# Supplementary material for: scMultiome analysis identifies embryonic hindbrain progenitors with mixed rhombomere identities
Source: eLife. 2023 Nov 10;12:e87772. doi: 10.7554/eLife.87772 (PMC10662952; doi:10.7554/eLife.87772)
Supplement: Figure 1—source data 2. [file elife-87772-fig1-data2.xlsx]

## Sheet: 1.Description
	This workbook lists all genes differentially expressed in each cluster relative to all clusters present in that analysis, as follows:
	Sheet	Content												Figure	Neural clusters
	1	Description
	2	List of all genes differentially expressed in each cluster relative to all clusters observed in 10hpf whole zebrafish embryos (res3.0)												Fig.3 - Fig. Supp. 1	HB.1, MHB, FB & eye.1, MB, CHB, HB.2, SC, FB & eye.2, HB & NC, FB, Ciliated
	3	List of all genes differentially expressed in each cluster relative to all clusters observed in 13hpf (rep1) dissected zebrafish hindbrains (res3.0)												Fig.1 - Fig. Supp. 1	r1 r2 & r4, FB & MB, MHB.1, CHB.1, SC, MHB.2, CHB.2, r3, r5, Neuron, r6, Eye.1, Eye.2, FB & eye, Ciliated
	4	List of all genes differentially expressed in each cluster relative to all clusters observed in 13hpf DEAB-treated dissected zebrafish hindbrains (res3.0)												Fig.7 - Fig. Supp. 1	r1/r2/r4, MHB.1, MB.1, HB-like, MHB.2, Eye.1, SC.1, FB/eye.1, r3, SC.2?, MHB.3, NC.2?, eye.2, ciliated
	5	List of all genes differentially expressed in each cluster relative to all clusters observed in 16hpf dissected zebrafish hindbrains (res3.0)												Fig.2 - Fig. Supp. 1	r2/r4, MB, CaudHB.1, SC, CaudHB.2, MHB, Neurons, DorsalNT/NC, r3, r6, r5.1, r5.2, Ciliated, Eye
	6	List of all genes differentially expressed in each cluster relative to all clusters observed in neural subset of 10hpf whole zebrafish embryos (res6.0)												Fig.3
	7	List of all genes differentially expressed in each cluster relative to all clusters observed in neural subset of 13hpf (rep1) dissected zebrafish hindbrains (res8.0)												Fig.1
	8	List of all genes differentially expressed in each cluster relative to all clusters observed in neural subset of 16hpf dissected zebrafish hindbrains (res6.0)												Fig.2
	The columns in each sheet contain the following information:
	Column	Information
	A	Gene name
	B	p value
	C	fold change in gene expression between the specified cluster (sample 1) and all clusters (sample 2); expressed as log2 of average for all cells in each cluster
	D	Percentage of cells in sample 1 expressing the gene
	E	Percentage of cells in sample 2 expressing the gene
	F	adjusted p value
	G	cluster name
	H	Gene name

## Sheet: 2.WE10hpf_WT_all_clusters
	p_val	avg_log2FC	pct.1	pct.2	p_val_adj	cluster	gene
cldni	1.80458e-184	1.21619	0.664	0.015	3.22803e-180	Placode.1	cldni
samd10a	4.91149e-166	1.30942	0.614	0.015	8.78568e-162	Placode.1	samd10a
myh9a	4.56343e-154	1.6688	0.786	0.057	8.16306e-150	Placode.1	myh9a
rpe65b	7.09403e-154	1.66862	0.736	0.044	1.26898e-149	Placode.1	rpe65b
gata2a	8.20622e-145	1.60952	0.786	0.059	1.46793e-140	Placode.1	gata2a
niban2a	4.65957e-140	1.81814	0.793	0.071	8.33504e-136	Placode.1	niban2a
F2RL3	6.06149e-135	1.08278	0.529	0.016	1.08428e-130	Placode.1	F2RL3
pls3	1.65985e-134	2.28934	0.857	0.103	2.96913e-130	Placode.1	pls3
fermt1	2.03632e-131	1.57267	0.793	0.073	3.64257e-127	Placode.1	fermt1
pitpnc1b	1.49167e-129	1.15674	0.55	0.022	2.66831e-125	Placode.1	pitpnc1b
itga3b	2.1395e-129	1.7723	0.821	0.089	3.82713e-125	Placode.1	itga3b
bmp7a	3.73137e-122	1.4433	0.779	0.083	6.67467e-118	Placode.1	bmp7a
tp63	1.70056e-119	2.46668	0.957	0.172	3.04196e-115	Placode.1	tp63
myo9b	7.97952e-118	0.849904	0.493	0.018	1.42738e-113	Placode.1	myo9b
gata3	1.92372e-117	1.15823	0.607	0.04	3.44116e-113	Placode.1	gata3
plekha6	1.52064e-115	2.32128	0.921	0.161	2.72013e-111	Placode.1	plekha6
tnfaip8l2b	7.17571e-115	0.851776	0.443	0.012	1.28359e-110	Placode.1	tnfaip8l2b
myo1eb	3.09439e-112	0.969506	0.564	0.034	5.53525e-108	Placode.1	myo1eb
cnksr1	2.32155e-107	1.10504	0.621	0.048	4.15278e-103	Placode.1	cnksr1
zgc:92380	6.59354e-107	1.07606	0.493	0.023	1.17945e-102	Placode.1	zgc:92380
dok4	4.0379e-106	1.46707	0.593	0.046	7.22299e-102	Placode.1	dok4
ahnak	9.26967e-105	1.51542	0.829	0.124	1.65816e-100	Placode.1	ahnak
hpgd	2.54834e-104	0.987407	0.479	0.022	4.55847e-100	Placode.1	hpgd
dnase1l4.1	4.60325e-104	1.25293	0.679	0.07	8.23429e-100	Placode.1	dnase1l4.1
lama5	1.32907e-103	2.66589	0.979	0.246	2.37744e-99	Placode.1	lama5
tagln2	2.23994e-98	1.33444	0.579	0.05	4.0068e-94	Placode.1	tagln2
zgc:86896	5.10989e-98	0.739097	0.414	0.015	9.14057e-94	Placode.1	zgc:86896
ppap2d	1.59386e-97	1.1029	0.5	0.031	2.8511e-93	Placode.1	ppap2d
tfap2c	1.21435e-94	1.70068	0.843	0.145	2.17223e-90	Placode.1	tfap2c
zgc:92360	1.72681e-92	0.617196	0.386	0.013	3.08892e-88	Placode.1	zgc:92360
ptk2bb	3.18501e-92	0.667447	0.364	0.011	5.69735e-88	Placode.1	ptk2bb
adam28	1.34424e-91	0.932675	0.429	0.021	2.40458e-87	Placode.1	adam28
itga6b	3.04362e-90	1.17703	0.636	0.071	5.44443e-86	Placode.1	itga6b
cyp2y3	7.76393e-90	0.616159	0.357	0.011	1.38881e-85	Placode.1	cyp2y3
sh3d21	1.862e-89	0.64432	0.357	0.011	3.33074e-85	Placode.1	sh3d21
fmo5	1.62167e-87	1.30705	0.693	0.101	2.90085e-83	Placode.1	fmo5
mmp30	2.36729e-87	0.840685	0.429	0.023	4.23461e-83	Placode.1	mmp30
nbeal2	1.40729e-86	0.930542	0.471	0.032	2.51735e-82	Placode.1	nbeal2
map3k15	6.12635e-86	0.868236	0.443	0.027	1.09588e-81	Placode.1	map3k15
krt4	2.21796e-85	0.748136	0.4	0.019	3.96748e-81	Placode.1	krt4
iqgap1	1.82721e-83	1.1882	0.671	0.095	3.26851e-79	Placode.1	iqgap1
camk2d1	2.62881e-83	0.881042	0.493	0.038	4.70242e-79	Placode.1	camk2d1
sema3b	2.86967e-82	0.611381	0.314	0.008	5.13327e-78	Placode.1	sema3b
itpr3	8.26821e-82	1.12298	0.65	0.089	1.47902e-77	Placode.1	itpr3
prss12	2.19818e-80	0.741783	0.4	0.022	3.9321e-76	Placode.1	prss12
satb2	5.23867e-79	0.60116	0.371	0.018	9.37093e-75	Placode.1	satb2
fat2	1.00998e-77	1.31595	0.764	0.139	1.80666e-73	Placode.1	fat2
padi2	2.91662e-75	0.546211	0.321	0.012	5.21724e-71	Placode.1	padi2
sult2st1	4.66278e-74	0.553164	0.321	0.013	8.34079e-70	Placode.1	sult2st1
trpm6	9.52471e-73	0.676513	0.407	0.029	1.70378e-68	Placode.1	trpm6
cdh1	5.41451e-72	1.34533	0.886	0.229	9.68547e-68	Placode.1	cdh1
vgll4l	6.00786e-72	0.565379	0.329	0.015	1.07469e-67	Placode.1	vgll4l
serpinh1a	1.42707e-70	0.704641	0.4	0.029	2.55275e-66	Placode.1	serpinh1a
zyx	1.85608e-70	1.4105	0.736	0.167	3.32015e-66	Placode.1	zyx
ecrg4b	3.82668e-70	0.559461	0.314	0.013	6.84517e-66	Placode.1	ecrg4b
grhl2b	4.74507e-69	1.23079	0.686	0.118	8.48798e-65	Placode.1	grhl2b
rras2	5.26975e-68	1.32199	0.707	0.142	9.42653e-64	Placode.1	rras2
cyt1	7.34687e-68	0.442361	0.286	0.01	1.31421e-63	Placode.1	cyt1
ppfibp2b	1.60118e-67	0.879724	0.479	0.052	2.8642e-63	Placode.1	ppfibp2b
pawr	3.90632e-67	1.14976	0.643	0.11	6.98762e-63	Placode.1	pawr
myh9b	1.57417e-65	1.16226	0.636	0.116	2.81588e-61	Placode.1	myh9b
bin2b	5.81674e-65	0.486266	0.314	0.016	1.0405e-60	Placode.1	bin2b
bmp2b	2.11515e-64	0.963326	0.529	0.072	3.78359e-60	Placode.1	bmp2b
sdr16c5a	4.44928e-64	0.790556	0.429	0.042	7.95888e-60	Placode.1	sdr16c5a
ank3a	5.38549e-64	0.841605	0.371	0.028	9.63356e-60	Placode.1	ank3a
cfl1l	1.42501e-63	0.458295	0.257	0.008	2.54906e-59	Placode.1	cfl1l
si:ch211-242b18.1	2.09784e-63	1.20762	0.721	0.162	3.75261e-59	Placode.1	si:ch211-242b18.1
tmem154	8.10522e-63	0.410956	0.229	0.005	1.44986e-58	Placode.1	tmem154
itprid1	1.00828e-62	0.386676	0.229	0.005	1.80362e-58	Placode.1	itprid1
mfge8b	2.84681e-61	1.17183	0.671	0.147	5.09237e-57	Placode.1	mfge8b
dgkzb	3.85232e-61	0.940566	0.564	0.088	6.89104e-57	Placode.1	dgkzb
alcama	4.66727e-61	1.34448	0.821	0.215	8.34881e-57	Placode.1	alcama
nuak1a	1.11201e-60	0.657904	0.393	0.035	1.98917e-56	Placode.1	nuak1a
bcam	1.53566e-60	1.75767	0.921	0.363	2.74699e-56	Placode.1	bcam
b3gnt2b	2.62904e-60	0.757843	0.5	0.065	4.70282e-56	Placode.1	b3gnt2b
tmsb1	1.80132e-59	0.48559	0.271	0.012	3.2222e-55	Placode.1	tmsb1
pcdh19	6.48005e-59	1.7012	1	0.718	1.15915e-54	Placode.1	pcdh19
pdzrn3b	1.31996e-58	1.42517	0.743	0.195	2.36115e-54	Placode.1	pdzrn3b
slit2	1.93859e-58	1.16219	0.721	0.16	3.46775e-54	Placode.1	slit2
dock5	5.22339e-56	0.896735	0.471	0.065	9.3436e-52	Placode.1	dock5
nfatc3a	7.2771e-56	0.977992	0.5	0.075	1.30173e-51	Placode.1	nfatc3a
dennd2da	7.40077e-56	0.801704	0.429	0.051	1.32385e-51	Placode.1	dennd2da
cd9b	2.21954e-55	0.576429	0.357	0.032	3.97031e-51	Placode.1	cd9b
rnf130	2.32242e-55	1.18033	0.65	0.145	4.15435e-51	Placode.1	rnf130
sema4e	1.21196e-54	0.35163	0.243	0.01	2.16796e-50	Placode.1	sema4e
capn8	1.8022e-54	0.666396	0.343	0.03	3.22378e-50	Placode.1	capn8
si:dkey-240h12.4	4.5282e-54	0.655438	0.364	0.035	8.10004e-50	Placode.1	si:dkey-240h12.4
CABZ01088428.1	5.01528e-54	0.928976	0.55	0.1	8.97133e-50	Placode.1	CABZ01088428.1
rock2b.1	6.7597e-54	1.06221	0.743	0.209	1.20918e-49	Placode.1	rock2b.1
epcam	1.69618e-52	0.904534	0.571	0.107	3.03412e-48	Placode.1	epcam
si:ch211-132p1.3	3.34871e-52	0.368068	0.207	0.006	5.99017e-48	Placode.1	si:ch211-132p1.3
atp8b1	3.81868e-52	0.542313	0.293	0.02	6.83086e-48	Placode.1	atp8b1
smad6b	5.21678e-52	1.5157	0.836	0.327	9.33177e-48	Placode.1	smad6b
fn1a	7.11781e-52	1.45748	0.871	0.304	1.27323e-47	Placode.1	fn1a
palm3	7.75311e-52	0.601516	0.3	0.022	1.38688e-47	Placode.1	palm3
pfn1	8.56982e-52	0.455252	0.286	0.019	1.53297e-47	Placode.1	pfn1
smad1	1.60105e-51	0.961652	0.6	0.127	2.86397e-47	Placode.1	smad1
cnn2	3.29116e-51	0.794921	0.479	0.076	5.88723e-47	Placode.1	cnn2
ssbp3a	3.62568e-51	1.11452	0.6	0.128	6.48561e-47	Placode.1	ssbp3a
dag1	1.35791e-50	1.58259	0.979	0.655	2.42903e-46	Placode.1	dag1
src	2.54869e-50	0.638305	0.357	0.037	4.55909e-46	Placode.1	src
elf1	1.00443e-49	0.997097	0.679	0.17	1.79672e-45	Placode.1	elf1
si:ch211-199g17.2	2.2522e-49	1.4498	0.65	0.165	4.02873e-45	Placode.1	si:ch211-199g17.2
hephl1a	3.46047e-49	0.977065	0.571	0.123	6.1901e-45	Placode.1	hephl1a
adora2aa	3.81865e-49	0.56743	0.307	0.026	6.83081e-45	Placode.1	adora2aa
stx2b	4.10943e-48	0.48067	0.279	0.02	7.35096e-44	Placode.1	stx2b
gna15.1	1.04375e-47	0.325392	0.171	0.003	1.86707e-43	Placode.1	gna15.1
plecb	1.23754e-47	0.436736	0.257	0.017	2.21371e-43	Placode.1	plecb
phactr4a	1.2814e-47	1.18063	0.7	0.207	2.29217e-43	Placode.1	phactr4a
cdc42ep3	6.8662e-47	0.332616	0.157	0.002	1.22823e-42	Placode.1	cdc42ep3
ppp1r9alb	1.57804e-46	0.396596	0.207	0.009	2.82281e-42	Placode.1	ppp1r9alb
apoeb	2.48378e-46	1.27762	0.886	0.418	4.44299e-42	Placode.1	apoeb
vsir	2.08873e-45	0.639107	0.379	0.05	3.73632e-41	Placode.1	vsir
pde4ba	2.49398e-45	0.652347	0.279	0.023	4.46123e-41	Placode.1	pde4ba
plcd1b	2.77705e-44	0.705297	0.486	0.085	4.96758e-40	Placode.1	plcd1b
pak2a	3.25974e-44	1.11838	0.743	0.266	5.83102e-40	Placode.1	pak2a
pdlim1	5.4895e-44	0.636384	0.4	0.059	9.81961e-40	Placode.1	pdlim1
col18a1a	9.70303e-44	1.33194	1	0.676	1.73568e-39	Placode.1	col18a1a
si:ch211-166a6.5	9.77577e-44	0.832417	0.529	0.113	1.74869e-39	Placode.1	si:ch211-166a6.5
lima1a	1.03966e-43	1.0192	0.8	0.274	1.85975e-39	Placode.1	lima1a
bcar1	1.22572e-43	1.18187	0.8	0.311	2.19256e-39	Placode.1	bcar1
zgc:171775	1.27208e-43	0.498086	0.293	0.027	2.27549e-39	Placode.1	zgc:171775
arhgdig	1.79887e-43	0.331842	0.221	0.013	3.21781e-39	Placode.1	arhgdig
si:dkey-239i20.2	2.58208e-43	0.552685	0.286	0.026	4.61883e-39	Placode.1	si:dkey-239i20.2
si:ch211-264f5.6	1.26961e-42	0.679319	0.386	0.055	2.27107e-38	Placode.1	si:ch211-264f5.6
2023-09-12	1.41817e-42	1.36562	0.886	0.505	2.53683e-38	Placode.1	2023-09-12
lamb1a	6.36395e-42	1.23401	0.95	0.585	1.13838e-37	Placode.1	lamb1a
znf385a	7.17363e-42	0.683546	0.607	0.131	1.28322e-37	Placode.1	znf385a
kctd15a	7.51515e-42	0.750694	0.614	0.155	1.34431e-37	Placode.1	kctd15a
ywhaz	1.07819e-41	0.92757	0.571	0.142	1.92866e-37	Placode.1	ywhaz
sh3gl1a	4.4471e-41	0.3379	0.171	0.006	7.95497e-37	Placode.1	sh3gl1a
si:ch211-1i11.3	1.1378e-39	0.83058	0.614	0.17	2.0353e-35	Placode.1	si:ch211-1i11.3
klf3	1.48175e-39	0.479288	0.286	0.03	2.65055e-35	Placode.1	klf3
esrp1	2.06799e-39	0.524575	0.429	0.073	3.69921e-35	Placode.1	esrp1
akap12b	6.01725e-39	1.35739	0.857	0.46	1.07637e-34	Placode.1	akap12b
smad7	2.74068e-38	0.970813	0.593	0.165	4.90252e-34	Placode.1	smad7
rps6ka3a	2.83103e-38	0.528859	0.393	0.065	5.06414e-34	Placode.1	rps6ka3a
bcar3	3.69834e-38	1.14129	0.779	0.297	6.61559e-34	Placode.1	bcar3
dspa	5.30463e-38	0.699938	0.407	0.073	9.48892e-34	Placode.1	dspa
ved	1.25108e-37	0.880278	0.507	0.114	2.23793e-33	Placode.1	ved
tspan15	1.83791e-37	0.544096	0.329	0.045	3.28765e-33	Placode.1	tspan15
jupa	7.73387e-37	1.14543	0.743	0.308	1.38344e-32	Placode.1	jupa
cxxc5b	8.16361e-37	0.825105	0.55	0.141	1.46031e-32	Placode.1	cxxc5b
bambia	8.38658e-37	0.7225	0.521	0.122	1.50019e-32	Placode.1	bambia
marcksl1b	9.84311e-37	0.937323	0.621	0.201	1.76074e-32	Placode.1	marcksl1b
alcamb	1.45573e-36	1.1067	0.986	0.716	2.60401e-32	Placode.1	alcamb
ptgs1	1.88135e-36	0.650685	0.421	0.077	3.36535e-32	Placode.1	ptgs1
ywhaqa	7.48476e-36	0.652258	0.493	0.114	1.33887e-31	Placode.1	ywhaqa
slc25a55a	7.79468e-36	0.922607	0.771	0.328	1.39431e-31	Placode.1	slc25a55a
rap1b	1.08012e-35	1.04827	0.807	0.415	1.93212e-31	Placode.1	rap1b
fndc3bb	2.43856e-35	1.10892	0.843	0.454	4.3621e-31	Placode.1	fndc3bb
shroom4	3.20049e-35	1.0439	0.786	0.375	5.72504e-31	Placode.1	shroom4
si:ch211-267e7.3	5.56674e-35	0.944143	0.664	0.246	9.95778e-31	Placode.1	si:ch211-267e7.3
ptpn3	8.81036e-35	0.281815	0.164	0.008	1.576e-30	Placode.1	ptpn3
si:ch211-129c21.1	1.28768e-34	0.326577	0.193	0.013	2.3034e-30	Placode.1	si:ch211-129c21.1
ARHGEF25	1.30712e-34	0.582327	0.35	0.055	2.33817e-30	Placode.1	ARHGEF25
tiam1b	1.3112e-34	1.09897	0.814	0.388	2.34547e-30	Placode.1	tiam1b
f3a	1.72604e-34	0.42022	0.279	0.034	3.08753e-30	Placode.1	f3a
dlc1	2.6208e-34	0.940738	0.643	0.217	4.68809e-30	Placode.1	dlc1
phldb2b	3.13752e-34	0.829565	0.357	0.062	5.6124e-30	Placode.1	phldb2b
gpc5a	4.71645e-34	0.631085	0.293	0.039	8.43679e-30	Placode.1	gpc5a
asap2b	1.21342e-33	0.295668	0.186	0.013	2.17057e-29	Placode.1	asap2b
arhgap17b	1.541e-33	0.428473	0.271	0.033	2.75653e-29	Placode.1	arhgap17b
cavin2a	1.12806e-32	0.300381	0.164	0.009	2.01787e-28	Placode.1	cavin2a
pxna	2.2377e-32	0.703482	0.45	0.106	4.0028e-28	Placode.1	pxna
eva1ba	8.81237e-32	0.490976	0.321	0.052	1.57636e-27	Placode.1	eva1ba
ltb4r2a	1.02843e-31	0.358638	0.179	0.013	1.83965e-27	Placode.1	ltb4r2a
gdpd2	1.33566e-31	0.292847	0.179	0.013	2.38923e-27	Placode.1	gdpd2
arhgef25b	5.77931e-31	0.250615	0.114	0.003	1.0338e-26	Placode.1	arhgef25b
sgms1	1.79466e-29	0.787663	0.564	0.182	3.21029e-25	Placode.1	sgms1
plxnb2a.1	2.93169e-29	0.772891	0.557	0.173	5.2442e-25	Placode.1	plxnb2a.1
mapk12a	3.43846e-29	0.414349	0.214	0.023	6.15072e-25	Placode.1	mapk12a
si:dkeyp-9d4.4	8.90204e-29	0.559523	0.357	0.073	1.5924e-24	Placode.1	si:dkeyp-9d4.4
pard6gb	9.74124e-29	1.0161	0.65	0.259	1.74251e-24	Placode.1	pard6gb
capn2a	2.83644e-28	0.27148	0.179	0.015	5.07383e-24	Placode.1	capn2a
ptbp1a	3.74695e-28	0.843889	0.686	0.305	6.70254e-24	Placode.1	ptbp1a
nid2a	4.02671e-28	0.967197	0.771	0.35	7.20298e-24	Placode.1	nid2a
fras1	5.27587e-28	0.991468	0.75	0.341	9.43748e-24	Placode.1	fras1
si:ch211-253b8.5	1.31429e-27	0.43032	0.264	0.04	2.351e-23	Placode.1	si:ch211-253b8.5
f11r.1	2.31177e-27	0.522573	0.421	0.102	4.1353e-23	Placode.1	f11r.1
adgrg6	2.81009e-27	0.388173	0.221	0.027	5.0267e-23	Placode.1	adgrg6
rarga	4.95115e-27	0.95766	0.779	0.377	8.85662e-23	Placode.1	rarga
id1	6.84022e-27	0.949497	0.929	0.694	1.22358e-22	Placode.1	id1
ctnnd1	1.05246e-26	0.924469	0.814	0.514	1.88265e-22	Placode.1	ctnnd1
lix1	1.68611e-26	0.310015	0.15	0.011	3.01612e-22	Placode.1	lix1
dnmt3bb.1	1.8029e-26	0.887496	0.529	0.176	3.22503e-22	Placode.1	dnmt3bb.1
BX649384.3	3.13314e-26	0.288819	0.2	0.022	5.60456e-22	Placode.1	BX649384.3
rgcc	5.79986e-26	0.33053	0.243	0.035	1.03748e-21	Placode.1	rgcc
fam107b	8.23864e-26	0.824344	0.629	0.257	1.47373e-21	Placode.1	fam107b
atp11a	1.00274e-25	0.628326	0.436	0.12	1.79369e-21	Placode.1	atp11a
sema6e	1.06507e-25	1.01731	0.593	0.229	1.90521e-21	Placode.1	sema6e
tpm3	2.625e-25	0.92826	0.757	0.428	4.69559e-21	Placode.1	tpm3
ctnna1	3.3663e-25	0.903054	0.879	0.731	6.02164e-21	Placode.1	ctnna1
lrrc8da	6.90055e-25	0.294801	0.236	0.034	1.23437e-20	Placode.1	lrrc8da
stard13b	8.84917e-25	0.565584	0.307	0.061	1.58294e-20	Placode.1	stard13b
lpp	9.05815e-25	1.10166	0.729	0.417	1.62032e-20	Placode.1	lpp
pkp2	1.2804e-24	0.55168	0.314	0.065	2.29038e-20	Placode.1	pkp2
flna	1.6961e-24	0.398542	0.321	0.066	3.03398e-20	Placode.1	flna
si:ch211-263k4.2.1	3.04373e-24	0.350204	0.164	0.016	5.44463e-20	Placode.1	si:ch211-263k4.2.1
igf2a	3.66322e-24	0.261218	0.186	0.021	6.55278e-20	Placode.1	igf2a
ephb2b	4.56846e-24	0.581376	0.336	0.075	8.17206e-20	Placode.1	ephb2b
btg1	6.24708e-24	0.893511	0.793	0.475	1.11748e-19	Placode.1	btg1
krt99	7.71195e-24	0.341757	0.136	0.01	1.37951e-19	Placode.1	krt99
pld1a	1.13934e-23	0.360236	0.214	0.03	2.03806e-19	Placode.1	pld1a
spint1a	1.43687e-23	0.320003	0.214	0.03	2.57027e-19	Placode.1	spint1a
mob2a	1.66103e-23	0.557045	0.507	0.166	2.97125e-19	Placode.1	mob2a
ccdc85cb	1.751e-23	0.332559	0.207	0.028	3.13219e-19	Placode.1	ccdc85cb
nol4lb	1.77566e-23	0.32461	0.193	0.024	3.17629e-19	Placode.1	nol4lb
rhbdf1a	2.40874e-23	0.433956	0.229	0.036	4.30875e-19	Placode.1	rhbdf1a
ptges	2.98313e-23	0.322765	0.2	0.026	5.33623e-19	Placode.1	ptges
rell1	7.00425e-23	0.669791	0.486	0.166	1.25292e-18	Placode.1	rell1
wnt9a	7.94034e-23	0.375356	0.193	0.025	1.42037e-18	Placode.1	wnt9a
pik3cb	1.33096e-22	0.627512	0.443	0.137	2.38081e-18	Placode.1	pik3cb
rapgef1b	1.40187e-22	0.730753	0.707	0.394	2.50767e-18	Placode.1	rapgef1b
sdc4	2.22466e-22	0.720086	0.593	0.247	3.97948e-18	Placode.1	sdc4
id3	2.93377e-22	0.567189	0.479	0.152	5.24794e-18	Placode.1	id3
lmo4b	6.31587e-22	0.547505	0.393	0.111	1.12978e-17	Placode.1	lmo4b
prrg2	7.34859e-22	0.290525	0.2	0.028	1.31452e-17	Placode.1	prrg2
fmnl2a	1.3922e-21	0.456841	0.329	0.079	2.49037e-17	Placode.1	fmnl2a
nuak2	1.39516e-21	0.568988	0.436	0.138	2.49567e-17	Placode.1	nuak2
pde7a	1.43818e-21	0.872543	0.771	0.455	2.57262e-17	Placode.1	pde7a
igsf3	1.68916e-21	0.939929	0.843	0.56	3.02157e-17	Placode.1	igsf3
fbrsl1	3.66843e-21	0.698366	0.564	0.225	6.56208e-17	Placode.1	fbrsl1
farp1	4.33267e-21	0.870895	0.736	0.423	7.75027e-17	Placode.1	farp1
nkd2a	5.28712e-21	0.347858	0.236	0.042	9.4576e-17	Placode.1	nkd2a
rbms1a	5.60284e-21	0.728355	0.671	0.315	1.00224e-16	Placode.1	rbms1a
klf6a	5.90583e-21	0.517818	0.307	0.073	1.05644e-16	Placode.1	klf6a
bambib	6.8652e-21	0.444528	0.307	0.073	1.22805e-16	Placode.1	bambib
hbp1	8.47178e-21	0.271405	0.186	0.026	1.51543e-16	Placode.1	hbp1
arhgap27l	1.67266e-20	0.260316	0.193	0.028	2.99206e-16	Placode.1	arhgap27l
slc25a23a	2.21401e-20	0.366637	0.25	0.049	3.96043e-16	Placode.1	slc25a23a
col16a1	2.22965e-20	0.460983	0.329	0.083	3.98839e-16	Placode.1	col16a1
edar	2.4405e-20	0.258507	0.207	0.033	4.36557e-16	Placode.1	edar
tes	3.22683e-20	0.434	0.329	0.084	5.77215e-16	Placode.1	tes
si:dkey-74k8.3	4.30106e-20	0.378639	0.271	0.058	7.69374e-16	Placode.1	si:dkey-74k8.3
notch2	6.23214e-20	0.425648	0.45	0.142	1.11481e-15	Placode.1	notch2
tfap2a	7.48953e-20	0.473259	0.421	0.128	1.33973e-15	Placode.1	tfap2a
meis1a	1.21699e-19	0.518001	0.271	0.059	2.17694e-15	Placode.1	meis1a
mrtfab	1.25438e-19	0.812255	0.621	0.306	2.24384e-15	Placode.1	mrtfab
tmem30b	1.91192e-19	0.331071	0.243	0.048	3.42003e-15	Placode.1	tmem30b
zfpm1	3.51161e-19	0.454649	0.414	0.128	6.28157e-15	Placode.1	zfpm1
apoc1	4.35433e-19	0.882441	0.65	0.352	7.78903e-15	Placode.1	apoc1
map7d1b	4.95347e-19	0.591111	0.393	0.127	8.86077e-15	Placode.1	map7d1b
bmpr1ab	6.21428e-19	0.691195	0.779	0.458	1.11161e-14	Placode.1	bmpr1ab
whrnb	6.61298e-19	0.45917	0.314	0.081	1.18293e-14	Placode.1	whrnb
bmpr2b	1.01745e-18	0.880966	0.686	0.393	1.82002e-14	Placode.1	bmpr2b
pde4d	1.18201e-18	0.601686	0.436	0.154	2.11438e-14	Placode.1	pde4d
cpamd8	1.18412e-18	0.454675	0.379	0.116	2.11815e-14	Placode.1	cpamd8
socs7	1.43758e-18	0.291297	0.2	0.034	2.57155e-14	Placode.1	socs7
frem2a	1.83441e-18	0.501615	0.371	0.113	3.2814e-14	Placode.1	frem2a
myo1cb	2.10987e-18	0.390472	0.271	0.062	3.77413e-14	Placode.1	myo1cb
tmem132e	2.66247e-18	0.716108	0.879	0.662	4.76262e-14	Placode.1	tmem132e
arhgef4	2.75768e-18	0.519877	0.314	0.084	4.93294e-14	Placode.1	arhgef4
arhgef39	3.62938e-18	0.422397	0.386	0.12	6.49224e-14	Placode.1	arhgef39
lypd6	5.5718e-18	0.837263	0.386	0.129	9.96684e-14	Placode.1	lypd6
hspg2	6.00188e-18	0.755238	0.85	0.536	1.07362e-13	Placode.1	hspg2
cldn7b	7.38293e-18	0.415524	0.321	0.087	1.32066e-13	Placode.1	cldn7b
frmd4ba	1.24709e-17	0.658485	0.779	0.452	2.2308e-13	Placode.1	frmd4ba
plxnb3	2.50338e-17	0.635139	0.543	0.235	4.47805e-13	Placode.1	plxnb3
phldb1b	2.50391e-17	0.753042	0.764	0.447	4.479e-13	Placode.1	phldb1b
smtnl	2.9607e-17	0.405405	0.321	0.092	5.2961e-13	Placode.1	smtnl
mtus1b	3.45181e-17	0.3065	0.186	0.032	6.1746e-13	Placode.1	mtus1b
actb1	3.61689e-17	0.673334	0.693	0.423	6.46989e-13	Placode.1	actb1
ccser2b	3.73056e-17	0.568089	0.479	0.193	6.67323e-13	Placode.1	ccser2b
xpo6	4.87511e-17	0.576322	0.486	0.194	8.7206e-13	Placode.1	xpo6
utrn	1.00554e-16	0.610438	0.507	0.221	1.79871e-12	Placode.1	utrn
fgfr4	1.08271e-16	0.563793	0.686	0.355	1.93675e-12	Placode.1	fgfr4
zgc:92242	1.13973e-16	0.747002	0.657	0.337	2.03875e-12	Placode.1	zgc:92242
amotl2b	1.67294e-16	0.290095	0.214	0.044	2.99256e-12	Placode.1	amotl2b
lama1	2.91525e-16	0.672366	0.779	0.516	5.2148e-12	Placode.1	lama1
tead1b	3.1645e-16	0.822651	0.75	0.509	5.66066e-12	Placode.1	tead1b
cica	3.58157e-16	0.264021	0.171	0.029	6.4067e-12	Placode.1	cica
lamc1	3.86312e-16	0.752649	0.921	0.758	6.91034e-12	Placode.1	lamc1
sox6	7.73045e-16	0.5646	0.357	0.12	1.38282e-11	Placode.1	sox6
pcdh15a	1.29574e-15	0.341639	0.229	0.053	2.31783e-11	Placode.1	pcdh15a
wwtr1	1.34154e-15	0.512096	0.5	0.223	2.39975e-11	Placode.1	wwtr1
wnk1b	1.43956e-15	0.502604	0.4	0.143	2.57508e-11	Placode.1	wnk1b
dpf3	1.81849e-15	0.355218	0.286	0.081	3.25291e-11	Placode.1	dpf3
gdpd5a	2.31065e-15	0.367051	0.171	0.031	4.1333e-11	Placode.1	gdpd5a
capza1a	3.46967e-15	0.44963	0.364	0.128	6.20655e-11	Placode.1	capza1a
arpc2	4.95465e-15	0.468776	0.371	0.132	8.86288e-11	Placode.1	arpc2
atp2a2a	6.32302e-15	0.413517	0.329	0.104	1.13106e-10	Placode.1	atp2a2a
zgc:100829	6.9957e-15	0.448961	0.543	0.242	1.25139e-10	Placode.1	zgc:100829
mxi1	7.50792e-15	0.421126	0.293	0.087	1.34302e-10	Placode.1	mxi1
fgfr1a	1.42217e-14	0.617856	0.814	0.604	2.54397e-10	Placode.1	fgfr1a
nrp1a	1.48745e-14	0.419664	0.364	0.122	2.66076e-10	Placode.1	nrp1a
ska2	1.49109e-14	0.434866	0.486	0.203	2.66726e-10	Placode.1	ska2
cyp2p7	2.03618e-14	0.42041	0.314	0.101	3.64233e-10	Placode.1	cyp2p7
cd2ap	2.21499e-14	0.656424	0.586	0.33	3.96217e-10	Placode.1	cd2ap
zgc:153867	2.50828e-14	0.465629	0.436	0.183	4.48682e-10	Placode.1	zgc:153867
slc22a23	3.06001e-14	0.299901	0.193	0.042	5.47374e-10	Placode.1	slc22a23
lasp1	4.64337e-14	0.521578	0.45	0.201	8.30605e-10	Placode.1	lasp1
pcdh17	4.86226e-14	0.784977	0.329	0.113	8.69762e-10	Placode.1	pcdh17
nhsb	4.91506e-14	0.506684	0.493	0.213	8.79207e-10	Placode.1	nhsb
pacsin3	7.37852e-14	0.45004	0.386	0.149	1.31987e-09	Placode.1	pacsin3
C10H21orf91	8.39336e-14	0.376775	0.364	0.129	1.5014e-09	Placode.1	C10H21orf91
abcc4	8.54862e-14	0.369956	0.279	0.083	1.52918e-09	Placode.1	abcc4
tln2a	8.97633e-14	0.59512	0.55	0.295	1.60569e-09	Placode.1	tln2a
wwc3	9.32474e-14	0.513379	0.593	0.32	1.66801e-09	Placode.1	wwc3
wasf2	1.33287e-13	0.339242	0.3	0.097	2.38425e-09	Placode.1	wasf2
ubtd1b	1.70613e-13	0.537218	0.457	0.208	3.05192e-09	Placode.1	ubtd1b
dlx3b	1.74645e-13	0.328135	0.314	0.099	3.12405e-09	Placode.1	dlx3b
thsd7ba	2.07929e-13	0.33053	0.214	0.054	3.71943e-09	Placode.1	thsd7ba
fosl2	2.22021e-13	0.319389	0.229	0.06	3.97151e-09	Placode.1	fosl2
plpp2b	3.19777e-13	0.368668	0.25	0.072	5.72017e-09	Placode.1	plpp2b
nr2f6b	3.68981e-13	0.339469	0.25	0.073	6.60032e-09	Placode.1	nr2f6b
creb3l2	3.89856e-13	0.30044	0.286	0.09	6.97374e-09	Placode.1	creb3l2
pkp4	4.30995e-13	0.460577	0.564	0.283	7.70963e-09	Placode.1	pkp4
lrba	4.5981e-13	0.591382	0.55	0.274	8.22507e-09	Placode.1	lrba
stim1a	4.83877e-13	0.468832	0.371	0.148	8.6556e-09	Placode.1	stim1a
yap1	5.4535e-13	0.739243	0.786	0.604	9.75523e-09	Placode.1	yap1
asph	6.12466e-13	0.436981	0.479	0.213	1.09558e-08	Placode.1	asph
mboat2a	6.14737e-13	0.358942	0.214	0.056	1.09964e-08	Placode.1	mboat2a
jmjd1cb	6.23878e-13	0.616124	0.821	0.724	1.11599e-08	Placode.1	jmjd1cb
castor2	9.82384e-13	0.454777	0.364	0.143	1.75729e-08	Placode.1	castor2
plekho1b	1.71774e-12	0.625678	0.579	0.341	3.07269e-08	Placode.1	plekho1b
mctp1b	1.72654e-12	0.333551	0.214	0.057	3.08844e-08	Placode.1	mctp1b
rbms1b	1.78135e-12	0.464045	0.371	0.151	3.18648e-08	Placode.1	rbms1b
si:dkey-65b13.8	2.31558e-12	0.351366	0.229	0.065	4.14211e-08	Placode.1	si:dkey-65b13.8
pth2ra	2.66722e-12	0.661255	0.179	0.042	4.77113e-08	Placode.1	pth2ra
rreb1b	3.03256e-12	0.552381	0.564	0.315	5.42464e-08	Placode.1	rreb1b
scarb2a	3.55901e-12	0.483906	0.586	0.33	6.36636e-08	Placode.1	scarb2a
cd81a	3.83326e-12	0.540166	0.75	0.498	6.85694e-08	Placode.1	cd81a
smad9	4.13797e-12	0.428045	0.271	0.09	7.40201e-08	Placode.1	smad9
arhgap12a	4.93474e-12	0.301489	0.271	0.087	8.82727e-08	Placode.1	arhgap12a
camta1b	5.36183e-12	0.329997	0.214	0.059	9.59125e-08	Placode.1	camta1b
camk2g1	8.9421e-12	0.571112	0.707	0.485	1.59956e-07	Placode.1	camk2g1
brinp3a.2	1.02966e-11	0.295036	0.186	0.046	1.84186e-07	Placode.1	brinp3a.2
dpyda.1	1.26046e-11	0.26321	0.243	0.073	2.25471e-07	Placode.1	dpyda.1
wu:fi36a10	1.63651e-11	0.309477	0.3	0.104	2.92739e-07	Placode.1	wu:fi36a10
fbn2b	1.71522e-11	0.453585	0.55	0.283	3.06819e-07	Placode.1	fbn2b
wipf2a	1.88196e-11	0.293666	0.236	0.072	3.36646e-07	Placode.1	wipf2a
slc4a2a	1.99923e-11	0.256573	0.25	0.077	3.57622e-07	Placode.1	slc4a2a
camkk1a	2.05296e-11	0.470895	0.243	0.077	3.67234e-07	Placode.1	camkk1a
tpm4a	2.86983e-11	0.345757	0.293	0.103	5.13354e-07	Placode.1	tpm4a
dgkaa	3.33535e-11	0.296136	0.229	0.069	5.96627e-07	Placode.1	dgkaa
tead3b	3.49451e-11	0.620909	0.721	0.518	6.25098e-07	Placode.1	tead3b
elmo3	4.35402e-11	0.411394	0.364	0.154	7.78846e-07	Placode.1	elmo3
mknk2b	4.55518e-11	0.425843	0.529	0.287	8.1483e-07	Placode.1	mknk2b
ppp3ccb	4.76006e-11	0.520955	0.529	0.297	8.51479e-07	Placode.1	ppp3ccb
trpm7	5.0608e-11	0.290477	0.279	0.098	9.05275e-07	Placode.1	trpm7
myl12.1	5.62084e-11	0.463927	0.486	0.253	1.00546e-06	Placode.1	myl12.1
atl3	5.8084e-11	0.250684	0.221	0.067	1.03901e-06	Placode.1	atl3
tgfbr1a	1.14515e-10	0.49717	0.521	0.291	2.04844e-06	Placode.1	tgfbr1a
smurf1	1.14662e-10	0.481409	0.736	0.516	2.05108e-06	Placode.1	smurf1
schip1	1.30612e-10	0.330859	0.314	0.122	2.33639e-06	Placode.1	schip1
usp32	1.34246e-10	0.36983	0.407	0.187	2.40139e-06	Placode.1	usp32
svild	1.53212e-10	0.386125	0.464	0.232	2.74065e-06	Placode.1	svild
hic2	1.65765e-10	0.292759	0.279	0.1	2.96521e-06	Placode.1	hic2
pxdn	3.74841e-10	0.472697	0.293	0.115	6.70516e-06	Placode.1	pxdn
plpp3	3.82913e-10	0.579635	0.536	0.31	6.84954e-06	Placode.1	plpp3
fgfr2	4.63479e-10	0.318999	0.793	0.497	8.29072e-06	Placode.1	fgfr2
col4a5	5.49394e-10	0.476879	0.55	0.308	9.82756e-06	Placode.1	col4a5
erf	6.12157e-10	0.539478	0.643	0.464	1.09503e-05	Placode.1	erf
cabp2b	6.46068e-10	0.29089	0.214	0.068	1.15569e-05	Placode.1	cabp2b
bmp4	8.11721e-10	0.303062	0.25	0.088	1.45201e-05	Placode.1	bmp4
cdc42se1	1.00499e-09	0.254468	0.236	0.081	1.79773e-05	Placode.1	cdc42se1
alox12	1.33082e-09	0.374013	0.286	0.112	2.38057e-05	Placode.1	alox12
ippk	1.44548e-09	0.34699	0.293	0.118	2.58567e-05	Placode.1	ippk
snap23.1	1.44718e-09	0.299223	0.279	0.107	2.58871e-05	Placode.1	snap23.1
arpc4	1.50565e-09	0.342469	0.321	0.135	2.69331e-05	Placode.1	arpc4
myoc	2.05146e-09	0.277534	0.164	0.046	3.66966e-05	Placode.1	myoc
wnt3	2.54691e-09	0.474037	0.257	0.097	4.55592e-05	Placode.1	wnt3
CU571061.1	2.63958e-09	0.311484	0.229	0.079	4.72169e-05	Placode.1	CU571061.1
rnf19a	4.81012e-09	0.498229	0.614	0.39	8.60433e-05	Placode.1	rnf19a
pdlim7	6.1832e-09	0.339948	0.214	0.076	0.000110605	Placode.1	pdlim7
BX649384.1	6.28687e-09	0.254525	0.229	0.081	0.00011246	Placode.1	BX649384.1
tjp2a	6.3122e-09	0.357533	0.4	0.194	0.000112913	Placode.1	tjp2a
impdh2	6.80308e-09	0.323973	0.236	0.087	0.000121693	Placode.1	impdh2
smoc2	8.09076e-09	0.270859	0.179	0.053	0.000144727	Placode.1	smoc2
zgc:92140	1.08282e-08	0.274078	0.129	0.032	0.000193695	Placode.1	zgc:92140
col14a1a	1.18473e-08	0.344205	0.264	0.103	0.000211924	Placode.1	col14a1a
nckap1	1.31195e-08	0.467177	0.636	0.466	0.000234681	Placode.1	nckap1
efna1a	1.36034e-08	0.33053	0.357	0.166	0.000243337	Placode.1	efna1a
vps13a	1.46781e-08	0.304578	0.336	0.153	0.000262562	Placode.1	vps13a
gab1	1.47688e-08	0.450536	0.757	0.573	0.000264184	Placode.1	gab1
fstl1b	1.64992e-08	0.508142	0.636	0.439	0.000295138	Placode.1	fstl1b
ezrb	2.05726e-08	0.316907	0.264	0.106	0.000368002	Placode.1	ezrb
actb2	2.08309e-08	0.366695	0.664	0.454	0.000372623	Placode.1	actb2
tll1	2.22507e-08	0.481326	0.321	0.143	0.00039802	Placode.1	tll1
cd151l	2.28727e-08	0.457211	0.393	0.215	0.000409147	Placode.1	cd151l
ptbp3	2.4109e-08	0.453594	0.671	0.524	0.000431262	Placode.1	ptbp3
agap3	2.54378e-08	0.448988	0.579	0.362	0.000455031	Placode.1	agap3
si:ch211-67e16.11	2.69534e-08	0.320552	0.171	0.054	0.000482143	Placode.1	si:ch211-67e16.11
skila	2.728e-08	0.349052	0.279	0.118	0.000487985	Placode.1	skila
atp2b4	2.97615e-08	0.353268	0.557	0.331	0.000532373	Placode.1	atp2b4
mrtfbb	3.07047e-08	0.282282	0.207	0.074	0.000549246	Placode.1	mrtfbb
lsp1b	3.08337e-08	0.297235	0.507	0.279	0.000551554	Placode.1	lsp1b
pard3bb	4.40441e-08	0.498667	0.771	0.608	0.00078786	Placode.1	pard3bb
inpp4b	4.57918e-08	0.256768	0.143	0.04	0.000819124	Placode.1	inpp4b
unc5b	5.89934e-08	0.477935	0.779	0.554	0.00105527	Placode.1	unc5b
si:dkey-6f10.3	6.04637e-08	0.398606	0.307	0.141	0.00108157	Placode.1	si:dkey-6f10.3
zbtb10	6.18545e-08	0.258136	0.243	0.096	0.00110645	Placode.1	zbtb10
lgr4	6.19784e-08	0.467392	0.571	0.387	0.00110867	Placode.1	lgr4
SEMA4F	7.47409e-08	0.340206	0.436	0.233	0.00133696	Placode.1	SEMA4F
rab13	9.36375e-08	0.253899	0.25	0.102	0.00167499	Placode.1	rab13
uacab	9.68084e-08	0.28406	0.343	0.163	0.00173171	Placode.1	uacab
vdrb	1.05602e-07	0.373823	0.6	0.388	0.00188901	Placode.1	vdrb
pou2f2a.1	1.191e-07	0.384124	0.264	0.115	0.00213046	Placode.1	pou2f2a.1
itgb1b	1.28669e-07	0.268217	0.286	0.127	0.00230164	Placode.1	itgb1b
frmd6	1.55256e-07	0.402821	0.45	0.269	0.00277721	Placode.1	frmd6
rreb1a	1.67684e-07	0.492593	0.621	0.441	0.00299954	Placode.1	rreb1a
cyth1a.1	2.2773e-07	0.391722	0.557	0.354	0.00407363	Placode.1	cyth1a.1
clasp1a	2.43774e-07	0.433088	0.586	0.41	0.00436064	Placode.1	clasp1a
tefa	2.93874e-07	0.36216	0.421	0.236	0.00525682	Placode.1	tefa
wnt11f2	2.97593e-07	0.294024	0.286	0.129	0.00532334	Placode.1	wnt11f2
FRMD1	3.34375e-07	0.256617	0.243	0.101	0.0059813	Placode.1	FRMD1
ryk	3.4704e-07	0.409856	0.714	0.585	0.00620785	Placode.1	ryk
baiap2a	3.5079e-07	0.407017	0.479	0.297	0.00627492	Placode.1	baiap2a
tspan9b	3.51344e-07	0.300318	0.343	0.172	0.00628483	Placode.1	tspan9b
ralgapa2	3.74155e-07	0.381823	0.45	0.273	0.00669289	Placode.1	ralgapa2
mpped2a	4.47832e-07	0.455361	0.386	0.215	0.00801081	Placode.1	mpped2a
gpcpd1	4.861e-07	0.393895	0.414	0.236	0.00869536	Placode.1	gpcpd1
daam1b	5.08253e-07	0.346382	0.407	0.224	0.00909164	Placode.1	daam1b
gnai2a	5.66141e-07	0.339088	0.657	0.466	0.0101271	Placode.1	gnai2a
cdc42bpb	5.9196e-07	0.44329	0.693	0.533	0.010589	Placode.1	cdc42bpb
RIMBP2	5.95347e-07	0.585283	0.336	0.169	0.0106496	Placode.1	RIMBP2
pik3r3a	6.06972e-07	0.341703	0.264	0.121	0.0108575	Placode.1	pik3r3a
ror1	6.10364e-07	0.364477	0.736	0.47	0.0109182	Placode.1	ror1
samd4a	6.65716e-07	0.318851	0.293	0.141	0.0119083	Placode.1	samd4a
mmp15b	6.90158e-07	0.318114	0.421	0.23	0.0123455	Placode.1	mmp15b
adam10a	7.59468e-07	0.335219	0.329	0.168	0.0135854	Placode.1	adam10a
rasl10a	7.9881e-07	0.274301	0.214	0.088	0.0142891	Placode.1	rasl10a
itgav	8.70972e-07	0.34888	0.371	0.207	0.0155799	Placode.1	itgav
patj	8.72095e-07	0.393238	0.5	0.318	0.0156	Placode.1	patj
llgl2	1.04523e-06	0.294595	0.343	0.182	0.018697	Placode.1	llgl2
scaper	1.32657e-06	0.356786	0.45	0.281	0.0237298	Placode.1	scaper
tmsb4x	1.52374e-06	0.339709	0.514	0.328	0.0272567	Placode.1	tmsb4x
si:ch211-250c4.4	1.53542e-06	0.272942	0.336	0.172	0.0274655	Placode.1	si:ch211-250c4.4
nedd9	1.62061e-06	0.34992	0.471	0.291	0.0289894	Placode.1	nedd9
boc	1.79726e-06	0.325377	0.729	0.575	0.0321493	Placode.1	boc
arhgap35a	1.85012e-06	0.48161	0.8	0.744	0.033095	Placode.1	arhgap35a
si:ch211-158d24.2	1.9821e-06	0.344321	0.307	0.155	0.0354559	Placode.1	si:ch211-158d24.2
si:dkeyp-86c4.1	2.68357e-06	0.340126	0.35	0.194	0.0480038	Placode.1	si:dkeyp-86c4.1
cdc42l	2.69295e-06	0.254294	0.286	0.141	0.0481715	Placode.1	cdc42l
bmpr1aa	3.20179e-06	0.396977	0.671	0.536	0.0572736	Placode.1	bmpr1aa
ATP9A	3.64325e-06	0.318919	0.421	0.242	0.0651705	Placode.1	ATP9A
arrb2b	4.17349e-06	0.259017	0.364	0.201	0.0746554	Placode.1	arrb2b
coro1ca	4.52807e-06	0.367049	0.671	0.535	0.0809982	Placode.1	coro1ca
tnfrsf19	4.78919e-06	0.472057	0.486	0.329	0.0856691	Placode.1	tnfrsf19
arfip1	4.92101e-06	0.336545	0.321	0.175	0.088027	Placode.1	arfip1
ptp4a2b	5.74611e-06	0.349223	0.529	0.376	0.102786	Placode.1	ptp4a2b
tmod2	6.1936e-06	0.289459	0.321	0.174	0.110791	Placode.1	tmod2
dtx4b	6.55023e-06	0.262439	0.25	0.121	0.117171	Placode.1	dtx4b
prkcbb	6.85153e-06	0.345384	0.429	0.264	0.12256	Placode.1	prkcbb
slc25a25b	7.75841e-06	0.373904	0.314	0.172	0.138782	Placode.1	slc25a25b
far1	8.77333e-06	0.339586	0.443	0.288	0.156937	Placode.1	far1
sun1	1.00376e-05	0.311208	0.479	0.313	0.179552	Placode.1	sun1
xbp1	1.02904e-05	0.282096	0.393	0.232	0.184075	Placode.1	xbp1
fcho2	1.06565e-05	0.312763	0.507	0.331	0.190623	Placode.1	fcho2
insrb	1.33264e-05	0.386609	0.814	0.673	0.238383	Placode.1	insrb
igf1ra	1.42841e-05	0.366293	0.786	0.734	0.255514	Placode.1	igf1ra
lef1	1.43118e-05	0.271655	0.564	0.367	0.25601	Placode.1	lef1
ddi2	1.9808e-05	0.259139	0.257	0.133	0.354326	Placode.1	ddi2
bmp1a	2.17181e-05	0.25089	0.236	0.114	0.388494	Placode.1	bmp1a
amotl2a	2.17391e-05	0.251331	0.329	0.187	0.388869	Placode.1	amotl2a
stk40	4.54388e-05	0.294103	0.307	0.177	0.812809	Placode.1	stk40
BICD2	4.73357e-05	0.289696	0.307	0.18	0.846741	Placode.1	BICD2
rac1a	6.14716e-05	0.252504	0.429	0.285	1	Placode.1	rac1a
actn4	6.55813e-05	0.291043	0.771	0.676	1	Placode.1	actn4
fryl	6.58744e-05	0.263606	0.429	0.279	1	Placode.1	fryl
rock2a	7.29611e-05	0.306974	0.5	0.371	1	Placode.1	rock2a
ptbp1b	7.8046e-05	0.312071	0.679	0.582	1	Placode.1	ptbp1b
macf1a	8.31615e-05	0.573328	0.6	0.517	1	Placode.1	macf1a
rhocb	9.04023e-05	0.276787	0.4	0.257	1	Placode.1	rhocb
kpna5	9.31668e-05	0.26657	0.264	0.148	1	Placode.1	kpna5
ppp2r5a	9.50711e-05	0.356105	0.307	0.185	1	Placode.1	ppp2r5a
esyt2a	0.000121954	0.297806	0.35	0.221	1	Placode.1	esyt2a
ptk2ab	0.000136645	0.296178	0.436	0.295	1	Placode.1	ptk2ab
celf5a	0.000145422	0.315755	0.107	0.039	1	Placode.1	celf5a
flot2a	0.000155463	0.292348	0.457	0.316	1	Placode.1	flot2a
tmem63ba	0.000159388	0.254636	0.479	0.346	1	Placode.1	tmem63ba
egln1b	0.000161303	0.361333	0.386	0.248	1	Placode.1	egln1b
stox2b	0.00016131	0.287718	0.379	0.25	1	Placode.1	stox2b
ppp2cb	0.000178126	0.30944	0.55	0.429	1	Placode.1	ppp2cb
oxsr1b	0.000184317	0.25089	0.229	0.125	1	Placode.1	oxsr1b
gnb1a	0.000281976	0.319828	0.443	0.321	1	Placode.1	gnb1a
cdk17	0.000284057	0.383908	0.507	0.396	1	Placode.1	cdk17
sema6dl	0.000318735	0.307548	0.557	0.427	1	Placode.1	sema6dl
nbn	0.000327867	0.284419	0.393	0.268	1	Placode.1	nbn
snx13	0.000398748	0.279441	0.236	0.135	1	Placode.1	snx13
sipa1l3	0.000434498	0.252002	0.686	0.59	1	Placode.1	sipa1l3
epn2	0.000442596	0.304578	0.443	0.33	1	Placode.1	epn2
arhgap23a	0.000611242	0.260092	0.243	0.143	1	Placode.1	arhgap23a
vaspb	0.000661054	0.271446	0.436	0.313	1	Placode.1	vaspb
fam193a	0.000685602	0.259896	0.371	0.251	1	Placode.1	fam193a
wwc1	0.000694487	0.335399	0.629	0.55	1	Placode.1	wwc1
shc1	0.000748184	0.329045	0.45	0.331	1	Placode.1	shc1
nckap5l	0.000813239	0.264303	0.429	0.314	1	Placode.1	nckap5l
nxn	0.0010405	0.292414	0.614	0.524	1	Placode.1	nxn
tmcc3	0.001098	0.252225	0.457	0.343	1	Placode.1	tmcc3
sbf1	0.00150289	0.255896	0.507	0.386	1	Placode.1	sbf1
si:dkey-33c12.4	0.00166529	0.278234	0.579	0.484	1	Placode.1	si:dkey-33c12.4
C7H20orf27	0.00189498	0.263934	0.571	0.458	1	Placode.1	C7H20orf27
dennd5b	0.00205768	0.283081	0.364	0.263	1	Placode.1	dennd5b
rab10	0.00207679	0.253245	0.529	0.417	1	Placode.1	rab10
ptpn4a	0.00256816	0.264941	0.329	0.229	1	Placode.1	ptpn4a
arhgef12b	0.00315196	0.269783	0.707	0.665	1	Placode.1	arhgef12b
sh3rf1	0.00638109	0.294819	0.529	0.46	1	Placode.1	sh3rf1
atrnl1b	0.00846449	0.332239	0.571	0.522	1	Placode.1	atrnl1b
mafba	1.69589e-81	0.806034	0.289	0.005	3.03361e-77	HB.1	mafba
col7a1l	3.87483e-71	0.964208	0.456	0.035	6.9313e-67	HB.1	col7a1l
rfx4	7.76263e-59	1.51583	0.939	0.27	1.38858e-54	HB.1	rfx4
bicd1a	2.98354e-58	0.777986	0.386	0.031	5.33696e-54	HB.1	bicd1a
hnf1ba	1.02279e-57	0.769081	0.439	0.044	1.82957e-53	HB.1	hnf1ba
meis3	2.40851e-55	1.28602	0.675	0.125	4.30834e-51	HB.1	meis3
prickle2b	3.64039e-54	1.63069	0.956	0.389	6.51192e-50	HB.1	prickle2b
tshz1	4.24742e-53	1.28676	0.781	0.195	7.59778e-49	HB.1	tshz1
meis2a.1	9.61433e-44	0.56016	0.404	0.051	1.71981e-39	HB.1	meis2a.1
cgnl1	1.25203e-39	1.02241	0.789	0.258	2.23963e-35	HB.1	cgnl1
map7d1a	7.11339e-33	1.12643	0.86	0.39	1.27244e-28	HB.1	map7d1a
sox13	3.01222e-30	1.0256	0.86	0.39	5.38826e-26	HB.1	sox13
wnt11	4.42482e-30	0.626967	0.377	0.066	7.91512e-26	HB.1	wnt11
crabp2a	5.29895e-30	0.667279	0.491	0.108	9.47875e-26	HB.1	crabp2a
greb1l	1.33554e-29	1.323	0.947	0.738	2.38901e-25	HB.1	greb1l
dtnba	1.37833e-28	0.792774	0.658	0.221	2.46556e-24	HB.1	dtnba
ctnnal1	3.82469e-28	0.966736	0.746	0.303	6.8416e-24	HB.1	ctnnal1
cdh7a	1.03668e-26	1.31399	0.465	0.12	1.85442e-22	HB.1	cdh7a
tnika	2.24771e-26	0.617708	0.544	0.152	4.02071e-22	HB.1	tnika
plxdc2	2.58704e-26	0.828038	0.789	0.295	4.6277e-22	HB.1	plxdc2
nova2	6.49788e-26	0.977169	0.904	0.432	1.16234e-21	HB.1	nova2
megf10	1.01217e-25	0.588559	0.263	0.038	1.81057e-21	HB.1	megf10
ulk1b	2.04257e-25	0.706307	0.596	0.188	3.65375e-21	HB.1	ulk1b
olig4	6.80839e-25	0.480381	0.193	0.019	1.21788e-20	HB.1	olig4
letm1	1.1309e-23	0.815631	0.825	0.396	2.02295e-19	HB.1	letm1
tfdp2	2.55078e-21	0.844119	0.754	0.35	4.56283e-17	HB.1	tfdp2
plch1	4.4176e-21	0.862934	0.807	0.416	7.9022e-17	HB.1	plch1
myh14	1.74137e-20	0.654287	0.465	0.144	3.11496e-16	HB.1	myh14
ncam1a	1.78706e-20	0.663192	0.798	0.318	3.19669e-16	HB.1	ncam1a
qkib	3.16077e-20	0.474632	0.342	0.079	5.65399e-16	HB.1	qkib
hs3st3b1b	4.78285e-20	0.713157	0.632	0.234	8.55556e-16	HB.1	hs3st3b1b
meis2a	5.81443e-20	0.642981	0.518	0.179	1.04009e-15	HB.1	meis2a
robo3	6.30367e-20	0.788327	0.912	0.551	1.1276e-15	HB.1	robo3
NAV1	1.37312e-19	0.787533	0.86	0.457	2.45624e-15	HB.1	NAV1
adgrl1a	2.83102e-18	0.597027	0.237	0.043	5.06412e-14	HB.1	adgrl1a
ror11	3.48847e-18	0.800084	0.842	0.466	6.24017e-14	HB.1	ror1
nbeaa	5.7597e-18	0.429939	0.412	0.121	1.0303e-13	HB.1	nbeaa
hip1	8.20812e-18	0.719928	0.851	0.536	1.46827e-13	HB.1	hip1
pax3b	2.5687e-17	0.602916	0.333	0.086	4.59489e-13	HB.1	pax3b
rnf220a	5.42146e-17	1.12509	0.667	0.335	9.69792e-13	HB.1	rnf220a
blmh	5.98023e-17	0.662955	0.798	0.436	1.06974e-12	HB.1	blmh
efnb3b	5.99628e-17	0.846005	0.632	0.304	1.07262e-12	HB.1	efnb3b
cdh2	1.23417e-16	0.673101	0.965	0.671	2.20769e-12	HB.1	cdh2
celsr1b	1.38037e-16	0.707322	0.728	0.367	2.4692e-12	HB.1	celsr1b
klf7a	6.14471e-16	0.562221	0.465	0.162	1.09917e-11	HB.1	klf7a
pax3a	2.05209e-15	0.935189	0.588	0.256	3.67078e-11	HB.1	pax3a
CT990561.1	2.46394e-15	0.400446	0.254	0.058	4.40749e-11	HB.1	CT990561.1
sema3fb	4.38027e-15	0.63257	0.64	0.286	7.83542e-11	HB.1	sema3fb
robo1	4.41836e-15	0.737654	0.947	0.799	7.90356e-11	HB.1	robo1
fgfr1b	4.46854e-15	0.627701	0.921	0.689	7.99333e-11	HB.1	fgfr1b
epha4b	4.53492e-15	0.477109	0.316	0.087	8.11206e-11	HB.1	epha4b
cntfr	5.94758e-15	0.887186	0.772	0.413	1.0639e-10	HB.1	cntfr
adgrl3.1	6.95785e-15	0.660667	0.395	0.134	1.24462e-10	HB.1	adgrl3.1
fat3a	8.09101e-15	0.580995	0.64	0.297	1.44732e-10	HB.1	fat3a
efna3b	8.66884e-15	0.572408	0.649	0.299	1.55068e-10	HB.1	efna3b
meis1b	5.63585e-14	0.549469	0.807	0.429	1.00814e-09	HB.1	meis1b
celsr1a	5.63996e-14	0.603637	0.825	0.479	1.00888e-09	HB.1	celsr1a
trim71	7.48123e-14	0.650655	0.877	0.635	1.33824e-09	HB.1	trim71
foxb1a	7.61023e-14	0.283785	0.184	0.034	1.36132e-09	HB.1	foxb1a
dla	9.59436e-14	0.601654	0.579	0.263	1.71624e-09	HB.1	dla
pax6b	1.02056e-13	0.459233	0.5	0.192	1.82559e-09	HB.1	pax6b
wnt4	1.06151e-13	0.346961	0.254	0.062	1.89884e-09	HB.1	wnt4
trps1	1.4775e-13	0.478765	0.868	0.536	2.64295e-09	HB.1	trps1
mdkb	2.87368e-13	0.443165	0.509	0.21	5.14044e-09	HB.1	mdkb
sox3	3.52742e-13	0.374657	0.316	0.095	6.30985e-09	HB.1	sox3
magi1b	5.84075e-13	0.539866	0.693	0.369	1.04479e-08	HB.1	magi1b
gabrp	8.15581e-13	0.31256	0.228	0.055	1.45891e-08	HB.1	gabrp
negr1	1.13927e-12	0.489663	0.579	0.268	2.03793e-08	HB.1	negr1
BX284638.2	1.22248e-12	0.512234	0.623	0.303	2.18677e-08	HB.1	BX284638.2
fgfr41	3.51769e-12	0.521619	0.675	0.362	6.29244e-08	HB.1	fgfr4
dbn1	3.90729e-12	0.467674	0.64	0.324	6.98936e-08	HB.1	dbn1
foxp1b	4.93048e-12	0.484362	0.623	0.321	8.81965e-08	HB.1	foxp1b
mylk3	5.93334e-12	0.413854	0.43	0.168	1.06136e-07	HB.1	mylk3
scube2	6.08026e-12	0.453544	0.474	0.203	1.08764e-07	HB.1	scube2
lrrn1	9.37272e-12	0.385745	0.263	0.078	1.67659e-07	HB.1	lrrn1
nsd2	1.19958e-11	0.57461	0.737	0.429	2.1458e-07	HB.1	nsd2
dixdc1b	2.37182e-11	0.416238	0.518	0.239	4.2427e-07	HB.1	dixdc1b
antxr1c	3.92379e-11	0.419625	0.263	0.081	7.01887e-07	HB.1	antxr1c
cadm1a	4.52476e-11	0.662492	0.561	0.305	8.09389e-07	HB.1	cadm1a
zfhx3	5.42994e-11	0.308164	0.439	0.176	9.71308e-07	HB.1	zfhx3
zeb2a	5.5405e-11	0.583669	0.754	0.462	9.91085e-07	HB.1	zeb2a
fgfr3	7.33356e-11	0.6494	0.526	0.264	1.31183e-06	HB.1	fgfr3
FP102911.1	1.2281e-10	0.257317	0.219	0.059	2.19682e-06	HB.1	FP102911.1
si:ch211-216b21.2	1.75034e-10	0.272009	0.132	0.024	3.13101e-06	HB.1	si:ch211-216b21.2
notch1b	2.18139e-10	0.44251	0.579	0.291	3.90208e-06	HB.1	notch1b
plekhh1	2.19498e-10	0.724841	0.675	0.453	3.92638e-06	HB.1	plekhh1
sema3gb	2.98986e-10	0.407148	0.254	0.08	5.34826e-06	HB.1	sema3gb
epb41a	3.48392e-10	0.43506	0.64	0.339	6.23204e-06	HB.1	epb41a
raraa	3.7453e-10	0.457104	0.728	0.404	6.6996e-06	HB.1	raraa
lfng	7.60007e-10	0.427123	0.649	0.373	1.3595e-05	HB.1	lfng
rassf8b	9.1456e-10	0.304512	0.316	0.116	1.63596e-05	HB.1	rassf8b
sox19a	1.1075e-09	0.330565	0.333	0.129	1.98109e-05	HB.1	sox19a
ncam1b	1.32014e-09	0.334244	0.254	0.082	2.36146e-05	HB.1	ncam1b
foxp4	1.39799e-09	0.424407	0.842	0.556	2.50073e-05	HB.1	foxp4
si:ch211-152c2.3	1.71547e-09	0.497451	0.544	0.314	3.06862e-05	HB.1	si:ch211-152c2.3
rhbdl3	1.73031e-09	0.427253	0.325	0.125	3.09518e-05	HB.1	rhbdl3
zeb1b	1.73918e-09	0.523365	0.895	0.6	3.11105e-05	HB.1	zeb1b
cep131	3.49499e-09	0.62964	0.456	0.234	6.25185e-05	HB.1	cep131
kaznb	3.58618e-09	0.398115	0.509	0.255	6.41496e-05	HB.1	kaznb
si:ch211-212k18.5	4.33036e-09	0.328248	0.421	0.19	7.74616e-05	HB.1	si:ch211-212k18.5
dhrs11a	4.62858e-09	0.32812	0.281	0.103	8.2796e-05	HB.1	dhrs11a
col18a1a1	5.95758e-09	0.38832	0.956	0.685	0.000106569	HB.1	col18a1a
mycn	6.28208e-09	0.462071	0.456	0.231	0.000112374	HB.1	mycn
ndnf	7.82801e-09	0.315009	0.219	0.069	0.000140027	HB.1	ndnf
dpydb	7.87104e-09	0.267049	0.149	0.036	0.000140797	HB.1	dpydb
gpm6bb	1.16566e-08	0.267724	0.272	0.099	0.000208513	HB.1	gpm6bb
lrch4	1.17526e-08	0.393342	0.57	0.309	0.000210231	HB.1	lrch4
epha2a	1.60908e-08	0.568359	0.588	0.351	0.000287832	HB.1	epha2a
NPAS3	1.62422e-08	0.345626	0.246	0.084	0.000290541	HB.1	NPAS3
kpnb3	1.64502e-08	0.461145	0.746	0.51	0.000294261	HB.1	kpnb3
arvcfb	1.74878e-08	0.278131	0.237	0.081	0.000312822	HB.1	arvcfb
sfrp1a	2.08762e-08	0.266925	0.325	0.13	0.000373433	HB.1	sfrp1a
adgrl2a	2.17099e-08	0.416749	1	0.919	0.000388347	HB.1	adgrl2a
pak6a	2.91073e-08	0.357794	0.281	0.108	0.000520672	HB.1	pak6a
si:dkey-195m11.8	3.18561e-08	0.350641	0.5	0.268	0.000569843	HB.1	si:dkey-195m11.8
pappab	3.30433e-08	0.332974	0.553	0.281	0.000591079	HB.1	pappab
flvcr1	3.57076e-08	0.283423	0.211	0.069	0.000638738	HB.1	flvcr1
hyal2b	5.83511e-08	0.393482	0.307	0.129	0.00104378	HB.1	hyal2b
nup210	9.57502e-08	0.340787	0.544	0.308	0.00171278	HB.1	nup210
dag11	9.61098e-08	0.330907	0.93	0.664	0.00171921	HB.1	dag1
s1pr2	1.03732e-07	0.356504	0.693	0.411	0.00185555	HB.1	s1pr2
zgc:110158	1.05065e-07	0.492051	0.886	0.656	0.0018794	HB.1	zgc:110158
notch3	1.10284e-07	0.375117	0.781	0.515	0.00197275	HB.1	notch3
fgd4a	1.20917e-07	0.285219	0.193	0.062	0.00216296	HB.1	fgd4a
lrp2a	1.21435e-07	0.375401	0.579	0.329	0.00217222	HB.1	lrp2a
nos1apa.1	1.42317e-07	0.336142	0.693	0.418	0.00254576	HB.1	nos1apa.1
pax6a	1.43004e-07	0.379337	0.307	0.129	0.00255805	HB.1	pax6a
usp54a	1.82123e-07	0.359001	0.719	0.493	0.00325782	HB.1	usp54a
tiparp	2.14301e-07	0.384539	0.447	0.235	0.00383341	HB.1	tiparp
gli2b	2.3864e-07	0.378304	0.412	0.212	0.00426879	HB.1	gli2b
phf21aa	2.76631e-07	0.368253	0.579	0.343	0.00494837	HB.1	phf21aa
ctnnd2b	2.81521e-07	0.33376	0.526	0.286	0.00503584	HB.1	ctnnd2b
efnb2a	3.3561e-07	0.333512	0.456	0.242	0.0060034	HB.1	efnb2a
ndst3	3.53535e-07	0.346537	0.246	0.097	0.00632404	HB.1	ndst3
notum1a	4.23567e-07	0.300145	0.272	0.11	0.00757676	HB.1	notum1a
mapk12b	4.63972e-07	0.260129	0.219	0.081	0.00829954	HB.1	mapk12b
spock1	4.65631e-07	0.363507	0.184	0.062	0.0083292	HB.1	spock1
col4a51	4.97435e-07	0.600747	0.518	0.314	0.00889812	HB.1	col4a5
spag9a	6.15037e-07	0.391836	0.57	0.354	0.0110018	HB.1	spag9a
si:dkey-157g16.6	7.63524e-07	0.255979	0.298	0.132	0.0136579	HB.1	si:dkey-157g16.6
synrg	8.42968e-07	0.336906	0.333	0.162	0.015079	HB.1	synrg
ttyh3b	1.0414e-06	0.339233	0.325	0.156	0.0186287	HB.1	ttyh3b
ago1	1.09822e-06	0.33083	0.421	0.225	0.019645	HB.1	ago1
gli3	1.13088e-06	0.303271	0.86	0.63	0.0202291	HB.1	gli3
alcamb1	1.15571e-06	0.392959	0.904	0.727	0.0206733	HB.1	alcamb
PHF21B	1.18749e-06	0.305519	0.351	0.174	0.0212418	HB.1	PHF21B
carm1	1.19095e-06	0.417138	0.711	0.528	0.0213037	HB.1	carm1
sfrp5	1.21772e-06	0.315148	0.281	0.119	0.0217826	HB.1	sfrp5
CT027815.1	1.43748e-06	0.349331	0.518	0.308	0.0257136	HB.1	CT027815.1
hspg21	1.51484e-06	0.435826	0.798	0.545	0.0270974	HB.1	hspg2
dact2	1.5809e-06	0.253324	0.325	0.153	0.0282792	HB.1	dact2
bmpr1ba	1.72695e-06	0.287995	0.474	0.251	0.0308917	HB.1	bmpr1ba
RIMBP21	1.88051e-06	0.488558	0.351	0.171	0.0336386	HB.1	RIMBP2
mta1	3.49023e-06	0.352285	0.746	0.573	0.0624333	HB.1	mta1
vat1	4.89286e-06	0.33493	0.263	0.119	0.0875235	HB.1	vat1
adka	5.23277e-06	0.425568	0.781	0.649	0.0936039	HB.1	adka
cemip2	5.47247e-06	0.366994	0.5	0.318	0.0978915	HB.1	cemip2
ctdp1	5.6463e-06	0.383444	0.904	0.755	0.101001	HB.1	ctdp1
orc6	5.76042e-06	0.282156	0.298	0.142	0.103042	HB.1	orc6
ror2	6.10784e-06	0.429324	0.737	0.573	0.109257	HB.1	ror2
slc12a4	6.35238e-06	0.291439	0.395	0.216	0.113631	HB.1	slc12a4
lamb2l	6.8631e-06	0.255293	0.202	0.081	0.122767	HB.1	lamb2l
srgap2	6.95248e-06	0.37001	0.754	0.618	0.124366	HB.1	srgap2
rarab	7.27245e-06	0.267672	0.711	0.479	0.13009	HB.1	rarab
efna5a	7.83449e-06	0.259996	0.737	0.483	0.140143	HB.1	efna5a
clmn	8.28894e-06	0.27373	0.377	0.204	0.148273	HB.1	clmn
xylt1	9.78974e-06	0.424348	0.544	0.364	0.175119	HB.1	xylt1
anapc1	1.0625e-05	0.33699	0.64	0.453	0.190059	HB.1	anapc1
nkd1	1.07435e-05	0.309104	0.544	0.325	0.192179	HB.1	nkd1
asap2a	1.12229e-05	0.294915	0.684	0.463	0.200756	HB.1	asap2a
fmnl2b	1.17761e-05	0.323526	0.746	0.519	0.210651	HB.1	fmnl2b
mbd3b	1.24682e-05	0.26263	0.57	0.343	0.223032	HB.1	mbd3b
lig1	1.28517e-05	0.26742	0.632	0.402	0.229892	HB.1	lig1
pcdh1b	1.4135e-05	0.339334	0.43	0.24	0.252847	HB.1	pcdh1b
col4a6	1.54494e-05	0.534746	0.711	0.525	0.276359	HB.1	col4a6
pkdccb	1.91563e-05	0.250125	0.263	0.125	0.342668	HB.1	pkdccb
bckdk	1.98878e-05	0.345777	0.325	0.173	0.355754	HB.1	bckdk
gpc4	2.10532e-05	0.398739	0.789	0.631	0.3766	HB.1	gpc4
mtss1la	2.10937e-05	0.294345	0.421	0.241	0.377325	HB.1	mtss1la
agrn	2.17276e-05	0.260248	0.886	0.756	0.388664	HB.1	agrn
inavaa	2.20381e-05	0.312092	0.228	0.103	0.394218	HB.1	inavaa
notch1a	2.48735e-05	0.345613	0.798	0.611	0.444937	HB.1	notch1a
atp2b41	2.59559e-05	0.256372	0.544	0.336	0.464298	HB.1	atp2b4
nrarpb	3.3777e-05	0.258136	0.272	0.134	0.604204	HB.1	nrarpb
lrp1ab	3.54271e-05	0.36292	0.789	0.631	0.63372	HB.1	lrp1ab
slc29a1a	4.03436e-05	0.263972	0.518	0.327	0.721666	HB.1	slc29a1a
rcc2	4.30626e-05	0.315955	0.544	0.376	0.770303	HB.1	rcc2
cdk6	4.84897e-05	0.265995	0.57	0.369	0.867383	HB.1	cdk6
plagl2	5.11226e-05	0.315514	0.684	0.516	0.914481	HB.1	plagl2
fzd3a	5.15574e-05	0.282471	0.553	0.367	0.92226	HB.1	fzd3a
ches1	5.51323e-05	0.336599	0.5	0.331	0.986207	HB.1	ches1
ccdc102a	6.73637e-05	0.283337	0.368	0.213	1	HB.1	ccdc102a
appb	7.20477e-05	0.254619	0.298	0.162	1	HB.1	appb
aatf	7.25015e-05	0.253967	0.5	0.316	1	HB.1	aatf
adarb1b	7.62485e-05	0.295963	0.728	0.556	1	HB.1	adarb1b
chrd	9.06072e-05	0.278618	0.333	0.186	1	HB.1	chrd
atp1b3b	0.000101064	0.277545	0.237	0.116	1	HB.1	atp1b3b
zbtb16b	0.000106611	0.303886	0.614	0.408	1	HB.1	zbtb16b
rtca	0.000109304	0.289304	0.482	0.315	1	HB.1	rtca
si:ch211-222l21.1	0.000123357	0.281756	0.93	0.856	1	HB.1	si:ch211-222l21.1
sobpb	0.000125662	0.291668	0.412	0.255	1	HB.1	sobpb
raph1b	0.000130369	0.275051	0.605	0.455	1	HB.1	raph1b
pola1	0.000135557	0.28184	0.614	0.43	1	HB.1	pola1
uhrf1	0.000158972	0.297725	0.43	0.267	1	HB.1	uhrf1
sipa1l1	0.00018351	0.251743	0.746	0.549	1	HB.1	sipa1l1
khdrbs1a	0.000184246	0.266126	0.956	0.894	1	HB.1	khdrbs1a
hells	0.000220453	0.286814	0.535	0.371	1	HB.1	hells
mibp	0.000259551	0.282223	0.333	0.197	1	HB.1	mibp
rsrp1	0.000265856	0.30156	0.825	0.673	1	HB.1	rsrp1
sf3a2	0.000302594	0.26016	0.325	0.192	1	HB.1	sf3a2
tmem131l	0.000312469	0.349523	0.596	0.452	1	HB.1	tmem131l
llgl1	0.000341842	0.298436	0.614	0.463	1	HB.1	llgl1
si:dkeyp-120h9.1	0.000408678	0.256122	0.298	0.171	1	HB.1	si:dkeyp-120h9.1
nhsl1b	0.000416632	0.285695	0.737	0.611	1	HB.1	nhsl1b
rps9	0.000456764	0.282755	0.807	0.701	1	HB.1	rps9
ptprfb	0.000519085	0.268043	0.912	0.847	1	HB.1	ptprfb
wdr62	0.000524953	0.260101	0.377	0.239	1	HB.1	wdr62
mcm2	0.000534194	0.316037	0.5	0.344	1	HB.1	mcm2
tmem198a	0.000537621	0.291234	0.421	0.275	1	HB.1	tmem198a
myh10	0.000561076	0.251481	0.649	0.484	1	HB.1	myh10
numbl	0.000652086	0.337721	0.5	0.371	1	HB.1	numbl
hnrnpl2	0.000679138	0.276825	0.579	0.456	1	HB.1	hnrnpl2
hs3st3b1a	0.000705281	0.274333	0.254	0.14	1	HB.1	hs3st3b1a
efnb1	0.000883404	0.317572	0.509	0.361	1	HB.1	efnb1
ntn1a	0.000917286	0.56525	0.351	0.224	1	HB.1	ntn1a
arhgap10	0.00107273	0.256298	0.456	0.318	1	HB.1	arhgap10
nxn1	0.00109394	0.276747	0.675	0.521	1	HB.1	nxn
boc1	0.00117336	0.389397	0.658	0.582	1	HB.1	boc
ipo11	0.00153223	0.309611	0.675	0.545	1	HB.1	ipo11
hpca	0.00160913	0.271871	0.281	0.175	1	HB.1	hpca
ctps1a	0.00165743	0.264225	0.816	0.738	1	HB.1	ctps1a
tnrc6a	0.00181418	0.269304	0.623	0.514	1	HB.1	tnrc6a
nck2b	0.00205765	0.27025	0.798	0.692	1	HB.1	nck2b
mllt10	0.00209007	0.27237	0.763	0.723	1	HB.1	mllt10
edc4	0.00209872	0.264588	0.491	0.365	1	HB.1	edc4
srgap1a	0.0025073	0.265109	0.64	0.537	1	HB.1	srgap1a
map3k4	0.00272673	0.291679	0.605	0.48	1	HB.1	map3k4
ncor1	0.00290091	0.256082	0.728	0.638	1	HB.1	ncor1
jarid2b	0.00323659	0.279247	0.965	0.924	1	HB.1	jarid2b
plxnb1b	0.0043763	0.269382	0.649	0.553	1	HB.1	plxnb1b
kirrel3l	0.00512312	0.806657	0.316	0.229	1	HB.1	kirrel3l
ncalda	0.00689307	0.256683	0.491	0.371	1	HB.1	ncalda
cdon	0.00743442	0.331863	0.535	0.446	1	HB.1	cdon
pax2a	2.44904e-144	2.74027	0.864	0.064	4.38085e-140	MHB	pax2a
en2a	5.49995e-99	0.528025	0.32	0.003	9.83831e-95	MHB	en2a
pax5	3.44908e-96	1.27266	0.485	0.023	6.16971e-92	MHB	pax5
en2b	2.60068e-85	0.841165	0.272	0.002	4.65209e-81	MHB	en2b
wnt1	2.36745e-76	0.815123	0.388	0.017	4.23489e-72	MHB	wnt1
CR356242.1	3.07222e-66	0.992912	0.447	0.034	5.49559e-62	MHB	CR356242.1
fam189a1	5.1711e-57	1.11849	0.485	0.052	9.25006e-53	MHB	fam189a1
lmx1bb	7.06566e-55	1.63992	0.767	0.161	1.26391e-50	MHB	lmx1bb
her5	1.24206e-49	0.510515	0.262	0.013	2.2218e-45	MHB	her5
ncam1a1	1.2019e-44	1.53177	0.913	0.313	2.14997e-40	MHB	ncam1a
pax7a	6.78207e-43	0.394466	0.175	0.005	1.21318e-38	MHB	pax7a
zbtb16a	1.76785e-41	1.50199	1	0.672	3.16233e-37	MHB	zbtb16a
wnt8b	9.15319e-41	0.784695	0.388	0.048	1.63732e-36	MHB	wnt8b
kirrel3l1	3.95255e-39	1.40316	0.728	0.202	7.07031e-35	MHB	kirrel3l
tenm4	5.50348e-39	1.42483	0.971	0.479	9.84463e-35	MHB	tenm4
st8sia2	2.76273e-37	0.746653	0.505	0.094	4.94196e-33	MHB	st8sia2
cplx2	5.83934e-35	0.759206	0.34	0.043	1.04454e-30	MHB	cplx2
kif21b	9.16236e-35	0.719596	0.447	0.077	1.63896e-30	MHB	kif21b
tgm2l	3.36507e-32	0.564868	0.427	0.075	6.01944e-28	MHB	tgm2l
her11	3.83386e-31	0.694126	0.33	0.045	6.85802e-27	MHB	her11
SAMD5	4.88123e-31	0.554291	0.388	0.064	8.73155e-27	MHB	SAMD5
ptprn2	1.1058e-30	0.865872	0.835	0.279	1.97805e-26	MHB	ptprn2
skia	4.75162e-30	0.998812	0.874	0.377	8.4997e-26	MHB	skia
nell2a	2.95616e-28	0.254732	0.155	0.008	5.28798e-24	MHB	nell2a
zfhx4	4.53215e-28	1.12008	0.796	0.336	8.10711e-24	MHB	zfhx4
sox21a	6.59544e-28	0.361764	0.194	0.015	1.17979e-23	MHB	sox21a
ebf2	7.10084e-28	0.620032	0.35	0.056	1.2702e-23	MHB	ebf2
rfx41	2.96274e-26	0.849073	0.806	0.284	5.29975e-22	MHB	rfx4
zeb1b1	9.85361e-26	0.988688	0.981	0.596	1.76261e-21	MHB	zeb1b
si:dkey-49n23.1	1.16538e-25	0.481848	0.398	0.079	2.08463e-21	MHB	si:dkey-49n23.1
nova21	3.26675e-25	1.01197	0.903	0.436	5.84356e-21	MHB	nova2
hs3st3b1b1	4.10854e-25	0.875129	0.689	0.233	7.34936e-21	MHB	hs3st3b1b
ror12	5.2832e-24	1.04192	0.913	0.464	9.45059e-20	MHB	ror1
ptprnb	7.49157e-24	0.574886	0.35	0.066	1.34009e-19	MHB	ptprnb
s1pr21	9.83246e-24	0.91402	0.845	0.403	1.75883e-19	MHB	s1pr2
msi1	2.593e-23	0.797393	0.728	0.287	4.63837e-19	MHB	msi1
ntn1a1	6.99307e-23	1.20501	0.602	0.208	1.25092e-18	MHB	ntn1a
ndst2b	1.38487e-22	0.897413	0.553	0.182	2.47725e-18	MHB	ndst2b
efna5a1	1.65256e-22	0.886824	0.864	0.476	2.95611e-18	MHB	efna5a
NAV11	1.30074e-21	1.06321	0.845	0.461	2.32677e-17	MHB	NAV1
bmpr1ba1	1.47648e-21	0.693124	0.66	0.24	2.64113e-17	MHB	bmpr1ba
cntfr1	1.58497e-21	0.707295	0.883	0.408	2.8352e-17	MHB	cntfr
amot	8.54482e-21	0.643785	0.495	0.153	1.5285e-16	MHB	amot
adgrv1	2.13892e-20	0.783303	0.835	0.367	3.82609e-16	MHB	adgrv1
BX284638.21	2.18266e-20	0.73439	0.718	0.299	3.90435e-16	MHB	BX284638.2
si:ch211-137a8.4	4.56106e-20	0.500779	0.515	0.16	8.15882e-16	MHB	si:ch211-137a8.4
esrrga	4.75933e-20	0.449287	0.417	0.104	8.51349e-16	MHB	esrrga
cachd1	9.2591e-20	0.852278	0.942	0.712	1.65627e-15	MHB	cachd1
lrig1	9.29813e-20	0.792743	0.757	0.369	1.66325e-15	MHB	lrig1
pax3a1	5.84168e-19	0.632951	0.689	0.251	1.04496e-14	MHB	pax3a
fat3a1	1.76214e-18	0.630116	0.699	0.296	3.15212e-14	MHB	fat3a
foxp41	3.62779e-18	0.839203	0.893	0.555	6.48939e-14	MHB	foxp4
ntn1b	3.95413e-18	0.746256	0.398	0.112	7.07314e-14	MHB	ntn1b
celsr1b1	4.13211e-18	0.68417	0.786	0.366	7.39152e-14	MHB	celsr1b
jag2b	4.29606e-18	0.731449	0.806	0.414	7.6848e-14	MHB	jag2b
si:ch211-269k10.2	1.37932e-17	0.596168	0.563	0.209	2.46733e-13	MHB	si:ch211-269k10.2
auts2b	1.55484e-17	0.809505	0.709	0.343	2.7813e-13	MHB	auts2b
arhgap21a	1.93132e-17	0.680918	0.583	0.236	3.45474e-13	MHB	arhgap21a
si:dkey-83f18.15	2.00766e-17	0.45231	0.505	0.169	3.59131e-13	MHB	si:dkey-83f18.15
stra6	2.14488e-17	0.497445	0.214	0.035	3.83676e-13	MHB	stra6
lipeb	2.1977e-17	0.806719	0.553	0.217	3.93124e-13	MHB	lipeb
map7d1a1	3.34325e-17	0.59862	0.796	0.398	5.9804e-13	MHB	map7d1a
col27a1b	3.57943e-17	0.382446	0.272	0.055	6.40288e-13	MHB	col27a1b
fgf18b	5.95852e-17	0.284369	0.184	0.026	1.06586e-12	MHB	fgf18b
her8a	1.84434e-15	0.561985	0.466	0.168	3.29915e-11	MHB	her8a
igdcc3	4.61412e-15	0.503301	0.282	0.067	8.25374e-11	MHB	igdcc3
cdh7a1	7.196e-15	0.563626	0.408	0.126	1.28722e-10	MHB	cdh7a
lrp2a1	8.56999e-15	0.677355	0.67	0.324	1.533e-10	MHB	lrp2a
plxna1a	3.35347e-14	0.599599	0.417	0.146	5.99869e-10	MHB	plxna1a
col4a61	3.98722e-14	0.568553	0.883	0.515	7.13234e-10	MHB	col4a6
pax3b1	4.00516e-14	0.442628	0.32	0.088	7.16442e-10	MHB	pax3b
serinc4	4.91349e-14	0.296414	0.146	0.02	8.78925e-10	MHB	serinc4
zgc:110796	7.74e-14	0.445002	0.631	0.284	1.38453e-09	MHB	zgc:110796
si:ch211-212k18.51	1.12279e-13	0.467199	0.485	0.188	2.00844e-09	MHB	si:ch211-212k18.5
thsd7aa	1.30642e-13	0.297109	0.184	0.033	2.33692e-09	MHB	thsd7aa
plxdc21	1.33944e-13	0.685974	0.66	0.308	2.396e-09	MHB	plxdc2
ppargc1b	2.37175e-13	0.338191	0.33	0.096	4.24258e-09	MHB	ppargc1b
nrp2b	2.81893e-13	0.726921	0.816	0.469	5.04251e-09	MHB	nrp2b
efna2a	3.12743e-13	0.649975	0.728	0.375	5.59434e-09	MHB	efna2a
blmh1	3.46043e-13	0.639464	0.748	0.442	6.19001e-09	MHB	blmh
pappab1	4.28582e-13	0.404852	0.66	0.275	7.66648e-09	MHB	pappab
foxp1b1	5.1563e-13	0.56477	0.65	0.322	9.22359e-09	MHB	foxp1b
mdkb1	5.6131e-13	0.435952	0.515	0.211	1.00407e-08	MHB	mdkb
sb:cb81	5.77783e-13	0.520912	0.447	0.166	1.03354e-08	MHB	sb:cb81
mllt101	1.32762e-12	0.602541	0.922	0.712	2.37485e-08	MHB	mllt10
si:dkey-195m11.81	1.47154e-12	0.530591	0.573	0.264	2.6323e-08	MHB	si:dkey-195m11.8
scube21	1.76047e-12	0.563534	0.485	0.204	3.14912e-08	MHB	scube2
gulp1a	2.35113e-12	0.359893	0.476	0.179	4.2057e-08	MHB	gulp1a
vegfc	2.42374e-12	0.264606	0.184	0.037	4.33558e-08	MHB	vegfc
gas7a	2.53707e-12	0.298199	0.214	0.048	4.53831e-08	MHB	gas7a
snx9b	2.93229e-12	0.363224	0.34	0.107	5.24527e-08	MHB	snx9b
her3	4.7537e-12	0.445599	0.252	0.066	8.50341e-08	MHB	her3
zeb2a1	5.06264e-12	0.648739	0.796	0.462	9.05605e-08	MHB	zeb2a
SIPA1	1.18312e-11	0.307181	0.194	0.043	2.11636e-07	MHB	SIPA1
nr2f5	1.86835e-11	0.462704	0.631	0.301	3.34211e-07	MHB	nr2f5
tns1b	4.51793e-11	0.424924	0.311	0.103	8.08167e-07	MHB	tns1b
zbtb16b1	4.7275e-11	0.671578	0.718	0.402	8.45655e-07	MHB	zbtb16b
trpc6b	7.12169e-11	0.268192	0.223	0.057	1.27393e-06	MHB	trpc6b
mn1b	7.27736e-11	0.337977	0.33	0.113	1.30177e-06	MHB	mn1b
si:ch211-168f7.5	8.19623e-11	0.465146	0.524	0.239	1.46614e-06	MHB	si:ch211-168f7.5
pkdcca	8.66488e-11	0.385573	0.709	0.346	1.54997e-06	MHB	pkdcca
gli31	1.04864e-10	0.591089	0.893	0.629	1.8758e-06	MHB	gli3
shroom3	1.05837e-10	0.38092	0.466	0.196	1.89322e-06	MHB	shroom3
sox19a1	2.39559e-10	0.276553	0.359	0.128	4.28524e-06	MHB	sox19a
si:ch73-386h18.1	2.79468e-10	0.468766	0.515	0.253	4.99913e-06	MHB	si:ch73-386h18.1
tiam2a	3.41162e-10	0.63407	0.757	0.48	6.1027e-06	MHB	tiam2a
dmbx1a	5.15054e-10	0.384641	0.252	0.074	9.21329e-06	MHB	dmbx1a
zeb2b	5.61766e-10	0.422298	0.398	0.161	1.00489e-05	MHB	zeb2b
ephb4b	9.04598e-10	0.455905	0.437	0.193	1.61814e-05	MHB	ephb4b
col4a52	1.17983e-09	0.366902	0.621	0.309	2.11049e-05	MHB	col4a5
rnf220a1	2.49481e-09	0.915535	0.592	0.342	4.46271e-05	MHB	rnf220a
wnt3a	3.25342e-09	0.390945	0.272	0.091	5.81971e-05	MHB	wnt3a
qkib1	3.30433e-09	0.315051	0.262	0.086	5.91079e-05	MHB	qkib
slc29a1a1	6.02969e-09	0.405159	0.592	0.324	0.000107859	MHB	slc29a1a
znrf3	6.4207e-09	0.665359	0.825	0.627	0.000114854	MHB	znrf3
letm11	9.63108e-09	0.496074	0.67	0.409	0.000172281	MHB	letm1
si:dkey-157g16.61	1.0047e-08	0.362853	0.33	0.131	0.00017972	MHB	si:dkey-157g16.6
si:dkey-217l24.1	1.04926e-08	0.329943	0.301	0.112	0.000187692	MHB	si:dkey-217l24.1
arfgef1	1.08953e-08	0.480465	0.612	0.36	0.000194895	MHB	arfgef1
tox	1.80753e-08	0.457334	0.864	0.596	0.000323331	MHB	tox
ZNF423	2.20188e-08	0.386839	0.699	0.402	0.000393873	MHB	ZNF423
ipo111	3.30068e-08	0.476434	0.806	0.537	0.000590426	MHB	ipo11
baz1b	3.63203e-08	0.367794	0.67	0.402	0.000649698	MHB	baz1b
fancc	5.41876e-08	0.250361	0.243	0.083	0.000969308	MHB	fancc
atm	6.69817e-08	0.38532	0.437	0.22	0.00119817	MHB	atm
ebf3a	9.113e-08	0.53048	0.34	0.146	0.00163013	MHB	ebf3a
man2a2	1.26837e-07	0.407333	0.505	0.281	0.00226886	MHB	man2a2
abcb5	1.42635e-07	0.421556	0.33	0.139	0.00255146	MHB	abcb5
lrp8	1.94131e-07	0.40958	0.515	0.286	0.00347261	MHB	lrp8
lmo3	2.67534e-07	0.304061	0.447	0.217	0.00478566	MHB	lmo3
CU570893.1	2.89938e-07	0.252661	0.214	0.073	0.00518641	MHB	CU570893.1
flrt3	2.91684e-07	0.329721	0.35	0.156	0.00521764	MHB	flrt3
plch11	3.17791e-07	0.284962	0.757	0.422	0.00568464	MHB	plch1
ephb4a	3.32419e-07	0.568099	0.709	0.545	0.00594632	MHB	ephb4a
kpnb31	3.35951e-07	0.468011	0.748	0.512	0.00600949	MHB	kpnb3
dgkh	3.36178e-07	0.33172	0.437	0.223	0.00601355	MHB	dgkh
syne2b	3.57611e-07	0.279794	0.408	0.19	0.00639695	MHB	syne2b
plxna3	3.58193e-07	0.31827	0.971	0.879	0.00640736	MHB	plxna3
ttc27	3.59065e-07	0.358508	0.573	0.337	0.00642295	MHB	ttc27
negr11	3.89033e-07	0.449961	0.505	0.275	0.00695902	MHB	negr1
rrm1	4.52038e-07	0.332785	0.476	0.251	0.00808606	MHB	rrm1
tmem131l1	5.49335e-07	0.375816	0.689	0.447	0.00982651	MHB	tmem131l
mbd3b1	5.76258e-07	0.313828	0.592	0.343	0.0103081	MHB	mbd3b
nkd11	6.9716e-07	0.351537	0.573	0.324	0.0124708	MHB	nkd1
adgrl2a1	7.65174e-07	0.388154	0.99	0.92	0.0136874	MHB	adgrl2a
frmd4ba1	8.28295e-07	0.346981	0.709	0.465	0.0148165	MHB	frmd4ba
prim2	1.00061e-06	0.455575	0.641	0.401	0.0178989	MHB	prim2
dbn11	1.01801e-06	0.392827	0.553	0.332	0.0182102	MHB	dbn1
igdcc4	1.04901e-06	0.28639	0.66	0.394	0.0187646	MHB	igdcc4
uck2a	1.17579e-06	0.31199	0.33	0.152	0.0210326	MHB	uck2a
ptprsa.1	1.49369e-06	0.412004	0.796	0.585	0.0267191	MHB	ptprsa.1
spag9a1	1.51099e-06	0.32348	0.592	0.354	0.0270287	MHB	spag9a
mcm3	1.88722e-06	0.332151	0.485	0.275	0.0337585	MHB	mcm3
ank2b	2.09241e-06	0.329135	0.252	0.104	0.037429	MHB	ank2b
wasf3b	2.41407e-06	0.407891	0.602	0.39	0.0431828	MHB	wasf3b
snx29	2.75402e-06	0.335788	0.447	0.25	0.049264	MHB	snx29
plagl21	3.13336e-06	0.336588	0.748	0.513	0.0560496	MHB	plagl2
dnmt1	3.58517e-06	0.294628	0.379	0.192	0.0641314	MHB	dnmt1
wdr18	3.92983e-06	0.376978	0.748	0.54	0.0702969	MHB	wdr18
mef2aa	4.15212e-06	0.313069	0.252	0.105	0.0742731	MHB	mef2aa
fnbp1a	4.33087e-06	0.259713	0.272	0.119	0.0774707	MHB	fnbp1a
tnikb	4.81451e-06	0.52537	0.524	0.366	0.0861219	MHB	tnikb
fam172a	4.90944e-06	0.366919	0.631	0.418	0.0878201	MHB	fam172a
agbl4.1	5.26486e-06	0.364486	0.32	0.157	0.0941778	MHB	agbl4.1
SEMA4F1	5.34475e-06	0.342046	0.437	0.238	0.0956069	MHB	SEMA4F
cita	5.56983e-06	0.297262	0.476	0.274	0.0996332	MHB	cita
adam15	7.8393e-06	0.268626	0.204	0.079	0.140229	MHB	adam15
rasal2	8.12982e-06	0.341475	0.786	0.611	0.145426	MHB	rasal2
plekha7b	8.50773e-06	0.330939	0.427	0.235	0.152186	MHB	plekha7b
ankrd10b	9.61176e-06	0.306889	0.379	0.202	0.171935	MHB	ankrd10b
crebzf	1.03483e-05	0.269613	0.767	0.527	0.185111	MHB	crebzf
fgfr21	1.2043e-05	0.273159	0.757	0.506	0.215425	MHB	fgfr2
syne1a	1.2104e-05	0.305974	0.214	0.086	0.216516	MHB	syne1a
uhrf11	1.64151e-05	0.3129	0.456	0.266	0.293633	MHB	uhrf1
ulk1b1	1.66087e-05	0.297943	0.388	0.205	0.297097	MHB	ulk1b
sema4c	2.06967e-05	0.37575	0.631	0.44	0.370222	MHB	sema4c
ssrp1a	2.23653e-05	0.362068	0.68	0.488	0.400071	MHB	ssrp1a
cemip21	4.37001e-05	0.298399	0.505	0.319	0.781707	MHB	cemip2
meis1b1	4.46261e-05	0.551549	0.602	0.445	0.798271	MHB	meis1b
si:ch211-243j20.2	4.76432e-05	0.266119	0.379	0.213	0.852242	MHB	si:ch211-243j20.2
anapc11	5.32711e-05	0.263535	0.65	0.453	0.952913	MHB	anapc1
grwd1	6.85689e-05	0.273943	0.476	0.306	1	MHB	grwd1
nat8l	6.93363e-05	0.296536	0.66	0.462	1	MHB	nat8l
ctdspl2a	7.0705e-05	0.252232	0.437	0.263	1	MHB	ctdspl2a
eef1g	7.16853e-05	0.267718	0.777	0.564	1	MHB	eef1g
ptpn13	7.63637e-05	0.257304	0.777	0.559	1	MHB	ptpn13
znf106b	9.39426e-05	0.322874	0.301	0.163	1	MHB	znf106b
camk2g2	9.49542e-05	0.319784	0.476	0.3	1	MHB	camk2g2
immp2l	9.55564e-05	0.340328	0.476	0.291	1	MHB	immp2l
pola11	9.60405e-05	0.266473	0.65	0.429	1	MHB	pola1
robo11	0.000102404	0.294172	0.874	0.805	1	MHB	robo1
sf3b3	0.00010749	0.252595	0.786	0.577	1	MHB	sf3b3
mcm21	0.000157698	0.34433	0.524	0.344	1	MHB	mcm2
phf6	0.000166966	0.27481	0.359	0.211	1	MHB	phf6
pcna	0.000180895	0.256544	0.515	0.352	1	MHB	pcna
zmiz1a	0.00018369	0.319823	0.738	0.594	1	MHB	zmiz1a
gli2b1	0.000195119	0.283562	0.369	0.216	1	MHB	gli2b
arhgap36	0.000201371	0.268259	0.301	0.159	1	MHB	arhgap36
nop56	0.00021382	0.323891	0.883	0.788	1	MHB	nop56
mast2	0.000214588	0.302132	0.66	0.464	1	MHB	mast2
unc119b	0.000233335	0.250064	0.223	0.108	1	MHB	unc119b
nap1l1	0.000235359	0.262822	0.738	0.544	1	MHB	nap1l1
PKN2	0.000238802	0.265322	0.34	0.193	1	MHB	PKN2
eef2a.1	0.000243055	0.257231	0.699	0.519	1	MHB	eef2a.1
fosab	0.000243242	0.268989	0.32	0.181	1	MHB	fosab
wdr19	0.000257357	0.255586	0.398	0.242	1	MHB	wdr19
epb41a1	0.000280148	0.276894	0.515	0.349	1	MHB	epb41a
dkc1	0.00029159	0.260131	0.825	0.681	1	MHB	dkc1
nabp1a	0.000306571	0.269524	0.544	0.374	1	MHB	nabp1a
kirrel1a	0.000329341	0.26001	0.592	0.397	1	MHB	kirrel1a
ccne2	0.000347542	0.293573	0.466	0.286	1	MHB	ccne2
e2f3	0.00036025	0.33642	0.699	0.514	1	MHB	e2f3
zcchc7	0.000362816	0.271178	0.689	0.536	1	MHB	zcchc7
etv4	0.000406625	0.321491	0.447	0.287	1	MHB	etv4
nav2b	0.000417601	0.333544	0.466	0.319	1	MHB	nav2b
arhgap29a	0.000434683	0.259513	0.485	0.315	1	MHB	arhgap29a
ctdspl2b	0.000447874	0.258807	0.379	0.235	1	MHB	ctdspl2b
afdna	0.000449304	0.311003	0.922	0.756	1	MHB	afdna
tusc3	0.000452992	0.26159	0.466	0.309	1	MHB	tusc3
kdm5bb	0.000517098	0.308984	0.398	0.26	1	MHB	kdm5bb
mta11	0.000544846	0.257995	0.738	0.574	1	MHB	mta1
hsp90ab1	0.000588603	0.260123	0.951	0.817	1	MHB	hsp90ab1
rrm2.1	0.000622042	0.311617	0.456	0.295	1	MHB	rrm2.1
bop1	0.000652889	0.28901	0.709	0.562	1	MHB	bop1
ddx18	0.000664367	0.274982	0.864	0.795	1	MHB	ddx18
LO018148.1	0.000667735	0.298024	0.631	0.484	1	MHB	LO018148.1
ctdp11	0.000736276	0.342627	0.864	0.758	1	MHB	ctdp1
acss2	0.000776063	0.254842	0.301	0.175	1	MHB	acss2
cpsf1	0.000778533	0.312253	0.476	0.336	1	MHB	cpsf1
stat3	0.000834787	0.278112	0.447	0.297	1	MHB	stat3
dtl	0.00091498	0.254806	0.476	0.313	1	MHB	dtl
orc3	0.000939942	0.286297	0.456	0.315	1	MHB	orc3
nme5	0.00101289	0.260589	0.476	0.322	1	MHB	nme5
rsrc1	0.00119927	0.312217	0.563	0.415	1	MHB	rsrc1
ncl	0.00126133	0.261539	0.845	0.727	1	MHB	ncl
hells1	0.00126238	0.272516	0.534	0.372	1	MHB	hells
grb10a	0.00132273	0.301676	0.835	0.716	1	MHB	grb10a
dnajc7	0.00146879	0.255755	0.485	0.348	1	MHB	dnajc7
sipa1l11	0.0015552	0.258327	0.718	0.552	1	MHB	sipa1l1
arnt2	0.00160712	0.266671	0.65	0.513	1	MHB	arnt2
zgc:153115	0.0018145	0.297773	0.515	0.389	1	MHB	zgc:153115
mcm10	0.00187004	0.263974	0.33	0.21	1	MHB	mcm10
nck2a	0.00189136	0.29995	0.505	0.376	1	MHB	nck2a
mdn1	0.00208572	0.25894	0.505	0.364	1	MHB	mdn1
mcm5	0.00218322	0.250978	0.437	0.299	1	MHB	mcm5
wls	0.00220265	0.278079	0.485	0.351	1	MHB	wls
nol6	0.00245811	0.25182	0.553	0.42	1	MHB	nol6
ptprfb1	0.00264356	0.266271	0.942	0.845	1	MHB	ptprfb
myh101	0.00278124	0.279316	0.631	0.487	1	MHB	myh10
thrab	0.00334605	0.286106	0.437	0.299	1	MHB	thrab
nnt	0.00367468	0.252859	0.456	0.336	1	MHB	nnt
suz12a	0.00367803	0.27292	0.417	0.289	1	MHB	suz12a
epn3a	0.00583987	0.289579	0.369	0.259	1	MHB	epn3a
arglu1a	0.00696799	0.271589	0.631	0.512	1	MHB	arglu1a
ints8	0.00885802	0.250483	0.796	0.732	1	MHB	ints8
si:dkey-91m11.5	8.43912e-136	2.03227	0.957	0.088	1.50959e-131	FB & eye.1	si:dkey-91m11.5
crb2a	9.33216e-113	1.47264	0.772	0.058	1.66934e-108	FB & eye.1	crb2a
traf4a	4.46304e-112	1.58012	0.815	0.072	7.98349e-108	FB & eye.1	traf4a
lhx2b	3.76796e-110	1.34976	0.707	0.047	6.74012e-106	FB & eye.1	lhx2b
spns2	1.2708e-100	1.37468	0.728	0.06	2.2732e-96	FB & eye.1	spns2
lhx9	1.59809e-81	0.495116	0.272	0.003	2.85866e-77	FB & eye.1	lhx9
si:ch73-364h19.1	1.93492e-81	0.92596	0.609	0.051	3.46118e-77	FB & eye.1	si:ch73-364h19.1
met	1.66144e-78	1.15488	0.739	0.085	2.97198e-74	FB & eye.1	met
six7	1.01802e-68	1.4759	0.826	0.129	1.82103e-64	FB & eye.1	six7
tet3	3.67184e-59	1.36286	0.739	0.129	6.56818e-55	FB & eye.1	tet3
sfrp51	2.33407e-58	1.33664	0.663	0.099	4.17519e-54	FB & eye.1	sfrp5
vcana	2.85438e-58	1.51253	0.848	0.188	5.10591e-54	FB & eye.1	vcana
rab11fip4a	2.43008e-56	1.49057	0.696	0.122	4.34693e-52	FB & eye.1	rab11fip4a
zic1	2.20594e-55	0.538611	0.38	0.027	3.94598e-51	FB & eye.1	zic1
si:dkey-240h12.3	2.5113e-54	1.22532	0.848	0.194	4.49221e-50	FB & eye.1	si:dkey-240h12.3
FP102911.11	1.38018e-53	0.767148	0.467	0.047	2.46887e-49	FB & eye.1	FP102911.1
rx3	1.57893e-53	0.639723	0.293	0.014	2.82439e-49	FB & eye.1	rx3
arhgef1a	2.51545e-52	1.1854	0.761	0.159	4.49963e-48	FB & eye.1	arhgef1a
pappab2	2.554e-52	1.76949	0.913	0.263	4.56859e-48	FB & eye.1	pappab
hs3st3b1a1	5.87355e-52	1.117	0.685	0.117	1.05066e-47	FB & eye.1	hs3st3b1a
mab21l2	7.83448e-51	0.454999	0.228	0.007	1.40143e-46	FB & eye.1	mab21l2
nr2f51	1.88441e-50	1.59644	0.924	0.286	3.37084e-46	FB & eye.1	nr2f5
shisa2a	2.00849e-48	1.39134	0.848	0.209	3.59279e-44	FB & eye.1	shisa2a
ANOS1	2.8476e-48	0.909889	0.576	0.088	5.09379e-44	FB & eye.1	ANOS1
pax2b	1.9274e-45	0.655629	0.348	0.029	3.44773e-41	FB & eye.1	pax2b
swap70b	8.21953e-45	0.556764	0.402	0.042	1.47031e-40	FB & eye.1	swap70b
plxdc22	2.41689e-43	1.28884	0.913	0.295	4.32333e-39	FB & eye.1	plxdc2
hs3st3b1b2	1.37079e-41	1.14644	0.837	0.227	2.45207e-37	FB & eye.1	hs3st3b1b
ptprn21	1.99757e-40	1.22274	0.891	0.279	3.57325e-36	FB & eye.1	ptprn2
fgfrl1a	6.38533e-40	1.11116	0.739	0.171	1.14221e-35	FB & eye.1	fgfrl1a
si:dkey-22o22.2	7.85486e-38	0.773339	0.5	0.077	1.40508e-33	FB & eye.1	si:dkey-22o22.2
pax6b1	5.7485e-36	1.17045	0.717	0.184	1.02829e-31	FB & eye.1	pax6b
hs6st1a	4.65304e-35	1.07837	0.696	0.176	8.32336e-31	FB & eye.1	hs6st1a
auts2b1	5.09035e-35	1.08034	0.913	0.334	9.10561e-31	FB & eye.1	auts2b
ek1	5.78425e-35	1.05244	0.761	0.206	1.03469e-30	FB & eye.1	ek1
ston2	1.23792e-34	0.896413	0.707	0.186	2.21439e-30	FB & eye.1	ston2
six3b	1.63794e-33	0.419393	0.293	0.029	2.92995e-29	FB & eye.1	six3b
bmpr1ba2	2.75792e-33	1.10098	0.772	0.237	4.93337e-29	FB & eye.1	bmpr1ba
tmem108	4.07562e-32	1.19729	0.902	0.389	7.29047e-28	FB & eye.1	tmem108
camsap3	1.24564e-30	0.666304	0.587	0.136	2.2282e-26	FB & eye.1	camsap3
tcf7l2	4.3939e-30	1.1576	0.826	0.375	7.85981e-26	FB & eye.1	tcf7l2
zeb1b2	1.00799e-29	1.20323	0.978	0.599	1.8031e-25	FB & eye.1	zeb1b
adgrv11	2.3819e-29	1.1403	0.891	0.367	4.26074e-25	FB & eye.1	adgrv1
clic4	2.59844e-29	1.02745	0.87	0.36	4.64809e-25	FB & eye.1	clic4
sox5	3.07455e-28	1.12781	0.793	0.293	5.49975e-24	FB & eye.1	sox5
efnb2b	3.6518e-28	1.0393	0.924	0.43	6.53234e-24	FB & eye.1	efnb2b
zgc:77158	2.88838e-27	1.01173	0.859	0.387	5.16674e-23	FB & eye.1	zgc:77158
gli32	9.78857e-27	1.21905	0.967	0.627	1.75098e-22	FB & eye.1	gli3
dclk2a	1.25513e-26	0.879401	0.554	0.143	2.24518e-22	FB & eye.1	dclk2a
meis2a1	3.73519e-26	0.679483	0.641	0.177	6.6815e-22	FB & eye.1	meis2a
zbtb16b2	3.86111e-26	1.12432	0.88	0.395	6.90675e-22	FB & eye.1	zbtb16b
pard6gb1	4.27675e-26	0.949626	0.75	0.265	7.65026e-22	FB & eye.1	pard6gb
cxadr	5.79851e-26	0.801627	0.87	0.343	1.03724e-21	FB & eye.1	cxadr
fgfr22	1.8928e-25	0.931578	0.935	0.497	3.38584e-21	FB & eye.1	fgfr2
rims2b	2.02556e-25	0.709067	0.533	0.133	3.62332e-21	FB & eye.1	rims2b
stm	6.52544e-25	0.731196	0.5	0.124	1.16727e-20	FB & eye.1	stm
nectin3b	1.39594e-24	0.879545	0.75	0.31	2.49705e-20	FB & eye.1	nectin3b
sox131	1.42684e-24	0.972175	0.87	0.396	2.55233e-20	FB & eye.1	sox13
cxcr4a	1.88703e-24	0.518419	0.359	0.064	3.37553e-20	FB & eye.1	cxcr4a
fgf14	4.5231e-24	0.298112	0.174	0.013	8.09093e-20	FB & eye.1	fgf14
ZNF4231	7.5349e-24	0.956808	0.88	0.394	1.34784e-19	FB & eye.1	ZNF423
vasnb	9.99326e-24	0.740605	0.5	0.127	1.78759e-19	FB & eye.1	vasnb
fndc5b	2.67288e-23	0.535543	0.315	0.052	4.78125e-19	FB & eye.1	fndc5b
ncam1a2	2.75417e-23	0.891845	0.859	0.321	4.92665e-19	FB & eye.1	ncam1a
adgrl3.11	1.11999e-22	0.688024	0.5	0.132	2.00344e-18	FB & eye.1	adgrl3.1
msi11	1.29813e-22	0.768276	0.772	0.287	2.3221e-18	FB & eye.1	msi1
gli2b2	1.5434e-22	0.732137	0.62	0.202	2.76083e-18	FB & eye.1	gli2b
sema3aa	1.83588e-22	0.787466	0.587	0.188	3.28402e-18	FB & eye.1	sema3aa
zbtb16a1	2.02371e-22	0.936916	1	0.675	3.62002e-18	FB & eye.1	zbtb16a
prox1a	6.42157e-22	0.279166	0.174	0.015	1.14869e-17	FB & eye.1	prox1a
dennd1b	2.76041e-21	0.779391	0.533	0.164	4.93782e-17	FB & eye.1	dennd1b
si:ch211-214c7.4	2.78064e-21	0.518161	0.457	0.113	4.974e-17	FB & eye.1	si:ch211-214c7.4
lman1	3.24919e-21	0.344813	0.239	0.032	5.81215e-17	FB & eye.1	lman1
lrp2a2	5.73471e-21	0.753002	0.793	0.319	1.02582e-16	FB & eye.1	lrp2a
afdna1	1.28326e-20	0.944042	0.967	0.755	2.29549e-16	FB & eye.1	afdna
tet2	2.43507e-20	0.543439	0.435	0.109	4.35585e-16	FB & eye.1	tet2
camkmt	9.35122e-20	0.657755	0.435	0.118	1.67275e-15	FB & eye.1	camkmt
flrt31	7.53137e-19	0.683624	0.5	0.149	1.34721e-14	FB & eye.1	flrt3
tenm41	1.33209e-18	1.10548	0.848	0.49	2.38284e-14	FB & eye.1	tenm4
chico	3.24316e-18	0.722743	0.598	0.221	5.80137e-14	FB & eye.1	chico
meis1b2	5.52769e-18	0.965974	0.826	0.433	9.88794e-14	FB & eye.1	meis1b
si:ch73-22o12.1	1.22013e-17	0.466008	0.511	0.152	2.18256e-13	FB & eye.1	si:ch73-22o12.1
otx2b	1.88648e-17	0.32774	0.304	0.062	3.37454e-13	FB & eye.1	otx2b
efnb2a1	2.48378e-17	0.647772	0.62	0.235	4.44299e-13	FB & eye.1	efnb2a
pax6a1	4.16878e-17	0.650493	0.435	0.124	7.45711e-13	FB & eye.1	pax6a
jam3b	6.87353e-17	0.705474	0.663	0.281	1.22954e-12	FB & eye.1	jam3b
nectin1b	9.54054e-17	0.76563	0.989	0.761	1.70661e-12	FB & eye.1	nectin1b
dvl3b	1.02973e-16	0.425887	0.391	0.102	1.84198e-12	FB & eye.1	dvl3b
nova22	1.1747e-16	0.675684	0.913	0.439	2.10131e-12	FB & eye.1	nova2
BX284638.22	1.17991e-16	0.622753	0.717	0.302	2.11062e-12	FB & eye.1	BX284638.2
crybg1a	1.76425e-16	0.652657	0.446	0.14	3.15588e-12	FB & eye.1	crybg1a
fat3a2	1.99513e-16	0.667764	0.696	0.299	3.56889e-12	FB & eye.1	fat3a
cdh21	2.60181e-16	0.717256	0.967	0.675	4.65412e-12	FB & eye.1	cdh2
2023-03-08	3.09646e-16	0.617192	0.587	0.23	5.53894e-12	FB & eye.1	2023-03-08
aplp2	4.05196e-16	0.650877	0.902	0.513	7.24814e-12	FB & eye.1	aplp2
pkdcca1	4.8863e-16	0.62906	0.783	0.344	8.74061e-12	FB & eye.1	pkdcca
arhgap32b	5.81274e-16	0.816584	0.75	0.413	1.03978e-11	FB & eye.1	arhgap32b
si:ch211-170d8.2	6.67881e-16	0.505408	0.413	0.121	1.19471e-11	FB & eye.1	si:ch211-170d8.2
nfia	4.74165e-15	0.571495	0.63	0.264	8.48186e-11	FB & eye.1	nfia
efna5a2	5.47687e-15	0.713574	0.826	0.481	9.79702e-11	FB & eye.1	efna5a
nav2b1	5.83875e-15	0.677673	0.674	0.307	1.04444e-10	FB & eye.1	nav2b
asap1b	9.25535e-15	0.740931	0.685	0.341	1.6556e-10	FB & eye.1	asap1b
klf13	2.51751e-14	0.314704	0.326	0.083	4.50333e-10	FB & eye.1	klf13
fat1a	1.09451e-13	0.62648	0.946	0.798	1.95786e-09	FB & eye.1	fat1a
sipa1l2	1.19727e-13	0.660901	0.87	0.651	2.14168e-09	FB & eye.1	sipa1l2
plxnb2b	1.61348e-13	0.25654	0.163	0.024	2.88618e-09	FB & eye.1	plxnb2b
tox1	2.13764e-13	0.730221	0.87	0.598	3.8238e-09	FB & eye.1	tox
grasp	3.02742e-13	0.412782	0.337	0.096	5.41545e-09	FB & eye.1	grasp
fnbp1a1	3.21882e-13	0.354273	0.38	0.114	5.75783e-09	FB & eye.1	fnbp1a
efnb3b1	5.22779e-13	0.607489	0.652	0.307	9.35148e-09	FB & eye.1	efnb3b
cadm3	6.41953e-13	0.364987	0.293	0.076	1.14832e-08	FB & eye.1	cadm3
adamts9	1.6307e-12	0.354298	0.272	0.068	2.917e-08	FB & eye.1	adamts9
plch12	1.67756e-12	0.623128	0.804	0.421	3.00082e-08	FB & eye.1	plch1
nxn2	2.14124e-12	0.701806	0.815	0.515	3.83025e-08	FB & eye.1	nxn
kif1b	3.97439e-12	0.453349	0.348	0.109	7.1094e-08	FB & eye.1	kif1b
foxp42	4.85344e-12	0.567441	0.87	0.559	8.68184e-08	FB & eye.1	foxp4
arhgap12b	6.38775e-12	0.546667	0.728	0.407	1.14264e-07	FB & eye.1	arhgap12b
celsr1b2	1.05981e-11	0.529165	0.739	0.371	1.89578e-07	FB & eye.1	celsr1b
si:ch211-285f17.1	1.60875e-11	0.511446	0.957	0.613	2.87773e-07	FB & eye.1	si:ch211-285f17.1
scube22	1.83512e-11	0.473334	0.5	0.205	3.28266e-07	FB & eye.1	scube2
gli1	2.24832e-11	0.407041	0.598	0.257	4.02179e-07	FB & eye.1	gli1
col18a1a2	2.48751e-11	0.720006	0.935	0.69	4.44967e-07	FB & eye.1	col18a1a
cntfr2	2.64749e-11	0.404858	0.804	0.416	4.73582e-07	FB & eye.1	cntfr
epha2b	2.86939e-11	0.551638	0.826	0.481	5.13277e-07	FB & eye.1	epha2b
si:dkey-217l24.11	5.23653e-11	0.428009	0.337	0.111	9.36711e-07	FB & eye.1	si:dkey-217l24.1
numbl1	5.43816e-11	0.57088	0.663	0.363	9.72778e-07	FB & eye.1	numbl
sall1a	7.94077e-11	0.365725	0.348	0.116	1.42044e-06	FB & eye.1	sall1a
nr2f2	1.36135e-10	0.297821	0.228	0.057	2.43519e-06	FB & eye.1	nr2f2
canx	1.4218e-10	0.524902	0.793	0.517	2.54331e-06	FB & eye.1	canx
atp8a1	2.7444e-10	0.47948	0.587	0.293	4.90919e-06	FB & eye.1	atp8a1
mdka	4.01946e-10	0.438029	0.261	0.076	7.19001e-06	FB & eye.1	mdka
rgl1	4.21876e-10	0.444071	0.674	0.357	7.54653e-06	FB & eye.1	rgl1
cyfip1	1.28418e-09	0.501882	0.62	0.348	2.29713e-05	FB & eye.1	cyfip1
cldn5a	1.54212e-09	0.369978	0.348	0.129	2.75855e-05	FB & eye.1	cldn5a
sox2	1.6888e-09	0.3018	0.304	0.102	3.02093e-05	FB & eye.1	sox2
igf2bp2a	1.81214e-09	0.325516	0.337	0.12	3.24155e-05	FB & eye.1	igf2bp2a
fam49a	4.21701e-09	0.366142	0.37	0.145	7.54339e-05	FB & eye.1	fam49a
si:dkey-112m2.1	4.6721e-09	0.306178	0.207	0.054	8.35746e-05	FB & eye.1	si:dkey-112m2.1
st8sia1	4.70214e-09	0.303866	0.359	0.134	8.41119e-05	FB & eye.1	st8sia1
rgs3b	4.80081e-09	0.275751	0.261	0.081	8.58769e-05	FB & eye.1	rgs3b
mylipa	6.95031e-09	0.666365	0.598	0.344	0.000124327	FB & eye.1	mylipa
zgc:114130	7.44351e-09	0.366671	0.391	0.161	0.00013315	FB & eye.1	zgc:114130
cdh23.1	8.11973e-09	0.25526	0.25	0.077	0.000145246	FB & eye.1	cdh23.1
pcdh191	8.84866e-09	0.390493	0.989	0.727	0.000158285	FB & eye.1	pcdh19
efna1a1	9.39359e-09	0.359387	0.402	0.169	0.000168033	FB & eye.1	efna1a
pou2f2a.11	1.59093e-08	0.256236	0.326	0.116	0.000284586	FB & eye.1	pou2f2a.1
mpp5a	1.77994e-08	0.422867	0.554	0.278	0.000318395	FB & eye.1	mpp5a
ccser2a	1.79707e-08	0.254216	0.228	0.067	0.000321461	FB & eye.1	ccser2a
si:dkey-12j5.1	2.56034e-08	0.457217	0.783	0.504	0.000457994	FB & eye.1	si:dkey-12j5.1
cnksr3	3.19982e-08	0.491144	0.543	0.298	0.000572384	FB & eye.1	cnksr3
phf21aa1	4.35794e-08	0.393334	0.63	0.343	0.000779548	FB & eye.1	phf21aa
arhgap33	4.46825e-08	0.434987	0.663	0.389	0.000799281	FB & eye.1	arhgap33
baz2ba	5.97028e-08	0.420942	0.924	0.728	0.00106796	FB & eye.1	baz2ba
tox2	6.08854e-08	0.450979	0.424	0.196	0.00108912	FB & eye.1	tox2
si:ch73-335l21.4	7.20175e-08	0.262495	0.152	0.036	0.00128825	FB & eye.1	si:ch73-335l21.4
nav2a	7.31198e-08	0.290707	0.467	0.216	0.00130797	FB & eye.1	nav2a
rassf8b1	9.26556e-08	0.349453	0.304	0.12	0.00165742	FB & eye.1	rassf8b
ift172	9.27586e-08	0.401887	0.5	0.26	0.00165927	FB & eye.1	ift172
map7d1a2	9.70605e-08	0.319096	0.717	0.405	0.00173622	FB & eye.1	map7d1a
rreb1b1	1.04603e-07	0.373165	0.609	0.32	0.00187114	FB & eye.1	rreb1b
si:ch211-210g13.5	1.11162e-07	0.262495	0.163	0.042	0.00198847	FB & eye.1	si:ch211-210g13.5
wee1	1.33749e-07	0.284292	0.402	0.179	0.0023925	FB & eye.1	wee1
tle2a	2.02874e-07	0.440428	0.87	0.645	0.00362901	FB & eye.1	tle2a
aldob	2.37557e-07	0.255817	0.272	0.1	0.00424941	FB & eye.1	aldob
znf536	2.45562e-07	0.287359	0.228	0.076	0.00439262	FB & eye.1	znf536
slc29a1a2	2.46753e-07	0.457586	0.576	0.327	0.00441391	FB & eye.1	slc29a1a
ctnnal11	2.71444e-07	0.401278	0.587	0.319	0.00485559	FB & eye.1	ctnnal1
epb41a2	2.84078e-07	0.426834	0.598	0.346	0.00508158	FB & eye.1	epb41a
mybbp1a	3.40999e-07	0.381372	0.75	0.509	0.0060998	FB & eye.1	mybbp1a
zfp36l1a	4.53215e-07	0.292122	0.272	0.104	0.00810711	FB & eye.1	zfp36l1a
rhoub	5.35149e-07	0.297121	0.283	0.11	0.00957275	FB & eye.1	rhoub
si:ch211-137a8.41	5.45319e-07	0.282782	0.38	0.17	0.00975467	FB & eye.1	si:ch211-137a8.4
rab30	5.81702e-07	0.308636	0.413	0.195	0.0104055	FB & eye.1	rab30
sppl3	7.65529e-07	0.510135	0.652	0.433	0.0136938	FB & eye.1	sppl3
sema3fb1	9.37955e-07	0.254873	0.576	0.295	0.0167781	FB & eye.1	sema3fb
rnd1b	1.02801e-06	0.337518	0.359	0.163	0.018389	FB & eye.1	rnd1b
dlc11	1.08526e-06	0.317273	0.478	0.239	0.0194131	FB & eye.1	dlc1
hspd1	1.12114e-06	0.267615	0.348	0.154	0.020055	FB & eye.1	hspd1
ccdc88c	1.13504e-06	0.352833	0.652	0.388	0.0203036	FB & eye.1	ccdc88c
ktn1	1.55659e-06	0.344831	0.674	0.446	0.0278442	FB & eye.1	ktn1
uck2a1	1.6009e-06	0.38056	0.337	0.152	0.0286369	FB & eye.1	uck2a
eif4g3a	1.61091e-06	0.31006	0.467	0.243	0.0288159	FB & eye.1	eif4g3a
elp4	1.62427e-06	0.343052	0.293	0.124	0.029055	FB & eye.1	elp4
CT027815.11	1.85636e-06	0.445778	0.522	0.31	0.0332066	FB & eye.1	CT027815.1
robo31	2.04264e-06	0.354559	0.826	0.561	0.0365387	FB & eye.1	robo3
tead3a	2.22275e-06	0.403452	0.467	0.255	0.0397605	FB & eye.1	tead3a
sh3bp4a	2.24177e-06	0.408345	0.467	0.253	0.0401008	FB & eye.1	sh3bp4a
mindy3	2.2575e-06	0.26373	0.283	0.115	0.0403821	FB & eye.1	mindy3
arhgap21a1	2.28213e-06	0.354194	0.467	0.245	0.0408227	FB & eye.1	arhgap21a
tmtc2b	2.92355e-06	0.259947	0.228	0.085	0.0522964	FB & eye.1	tmtc2b
ece1	3.21652e-06	0.252527	0.272	0.11	0.0575371	FB & eye.1	ece1
nrbp2a	3.24662e-06	0.307564	0.326	0.144	0.0580755	FB & eye.1	nrbp2a
acsl2	3.25583e-06	0.383849	0.457	0.254	0.0582403	FB & eye.1	acsl2
qsox2	3.42504e-06	0.40049	0.37	0.186	0.0612672	FB & eye.1	qsox2
arhgap29a1	3.50846e-06	0.361792	0.543	0.312	0.0627593	FB & eye.1	arhgap29a
negr12	3.51463e-06	0.314848	0.511	0.276	0.0628697	FB & eye.1	negr1
mat2ab	4.93506e-06	0.259362	0.315	0.141	0.0882784	FB & eye.1	mat2ab
rgma	5.00706e-06	0.275479	0.435	0.229	0.0895663	FB & eye.1	rgma
thrab1	5.38741e-06	0.373246	0.5	0.296	0.09637	FB & eye.1	thrab
tlcd3a	7.41893e-06	0.290936	0.424	0.222	0.13271	FB & eye.1	tlcd3a
cad	7.43277e-06	0.432812	0.674	0.448	0.132957	FB & eye.1	cad
zgc:86598	9.26214e-06	0.336245	0.511	0.304	0.165681	FB & eye.1	zgc:86598
bop11	1.01871e-05	0.372512	0.728	0.562	0.182227	FB & eye.1	bop1
adcy6b	1.22164e-05	0.420123	0.5	0.317	0.218527	FB & eye.1	adcy6b
srsf11	1.24541e-05	0.374177	0.652	0.453	0.222779	FB & eye.1	srsf11
uck2b	1.26648e-05	0.291201	0.391	0.201	0.226547	FB & eye.1	uck2b
pcdh171	1.29022e-05	0.339831	0.283	0.122	0.230795	FB & eye.1	pcdh17
man1a1	1.55585e-05	0.347084	0.424	0.245	0.27831	FB & eye.1	man1a1
rps8a	1.81824e-05	0.323514	0.772	0.587	0.325247	FB & eye.1	rps8a
eif5	2.02532e-05	0.275335	0.761	0.5	0.362289	FB & eye.1	eif5
plagl22	2.07287e-05	0.375206	0.717	0.517	0.370795	FB & eye.1	plagl2
zcchc71	2.30768e-05	0.374029	0.707	0.536	0.412798	FB & eye.1	zcchc7
pde1a	2.6259e-05	0.300288	0.25	0.109	0.469722	FB & eye.1	pde1a
wdr36	2.69466e-05	0.323984	0.793	0.59	0.482021	FB & eye.1	wdr36
orc31	2.79963e-05	0.336398	0.5	0.314	0.500798	FB & eye.1	orc3
gpc41	2.87788e-05	0.32322	0.837	0.631	0.514795	FB & eye.1	gpc4
pik3c2b	2.89266e-05	0.27674	0.663	0.426	0.51744	FB & eye.1	pik3c2b
nexmifb	2.98961e-05	0.285091	0.174	0.064	0.534782	FB & eye.1	nexmifb
igdcc41	3.18407e-05	0.356767	0.609	0.399	0.569567	FB & eye.1	igdcc4
zeb1a	3.54087e-05	0.262228	0.402	0.211	0.63339	FB & eye.1	zeb1a
si:ch211-212g7.6	3.82061e-05	0.256236	0.304	0.146	0.68343	FB & eye.1	si:ch211-212g7.6
fam171a1	4.13568e-05	0.288744	0.413	0.229	0.73979	FB & eye.1	fam171a1
fgfr1b1	4.30357e-05	0.251931	0.913	0.693	0.769823	FB & eye.1	fgfr1b
phf14	5.40586e-05	0.353493	0.609	0.422	0.967	FB & eye.1	phf14
si:dkey-49n23.11	5.45505e-05	0.272548	0.217	0.092	0.9758	FB & eye.1	si:dkey-49n23.1
tdh	6.10397e-05	0.285589	0.37	0.207	1	FB & eye.1	tdh
chsy1	6.41539e-05	0.425625	0.88	0.734	1	FB & eye.1	chsy1
trappc10	7.50472e-05	0.292291	0.457	0.274	1	FB & eye.1	trappc10
smyd2a	8.03514e-05	0.323116	0.304	0.157	1	FB & eye.1	smyd2a
shroom31	8.14896e-05	0.277546	0.37	0.204	1	FB & eye.1	shroom3
rps27.1	9.14026e-05	0.338919	0.739	0.563	1	FB & eye.1	rps27.1
npm1a	9.45419e-05	0.273827	0.783	0.577	1	FB & eye.1	npm1a
her6	9.4858e-05	0.315183	0.326	0.167	1	FB & eye.1	her6
chaf1a	0.000128731	0.32018	0.696	0.49	1	FB & eye.1	chaf1a
kpna3	0.000151166	0.352937	0.533	0.36	1	FB & eye.1	kpna3
skib	0.000240063	0.269393	0.337	0.187	1	FB & eye.1	skib
eef2a.11	0.000254523	0.264687	0.707	0.52	1	FB & eye.1	eef2a.1
htr2aa	0.000254944	0.301076	0.478	0.308	1	FB & eye.1	htr2aa
rpl3	0.000258188	0.259511	0.859	0.727	1	FB & eye.1	rpl3
nop2	0.000279511	0.289242	0.587	0.391	1	FB & eye.1	nop2
nabp1a1	0.000291574	0.290681	0.543	0.375	1	FB & eye.1	nabp1a
rps6	0.000293297	0.332777	0.761	0.581	1	FB & eye.1	rps6
rev3l	0.000293479	0.295302	0.37	0.221	1	FB & eye.1	rev3l
s1pr22	0.000321878	0.32877	0.598	0.421	1	FB & eye.1	s1pr2
fbxw7	0.000343208	0.266836	0.946	0.91	1	FB & eye.1	fbxw7
dennd5a	0.00036905	0.330142	0.511	0.349	1	FB & eye.1	dennd5a
ywhaqb	0.000378735	0.286124	0.576	0.392	1	FB & eye.1	ywhaqb
elmsan1b	0.000412707	0.34954	0.598	0.437	1	FB & eye.1	elmsan1b
pcsk5b	0.000415522	0.34807	0.522	0.36	1	FB & eye.1	pcsk5b
zgc:112982	0.000503305	0.252877	0.554	0.376	1	FB & eye.1	zgc:112982
pfdn1	0.00050354	0.29648	0.37	0.222	1	FB & eye.1	pfdn1
ctps1a1	0.000520151	0.2558	0.891	0.735	1	FB & eye.1	ctps1a
csnk1da	0.00052019	0.324309	0.576	0.421	1	FB & eye.1	csnk1da
nme2b.1	0.000552605	0.318939	0.489	0.335	1	FB & eye.1	nme2b.1
nhsl1b1	0.000581798	0.264363	0.804	0.609	1	FB & eye.1	nhsl1b
eif4h	0.00059021	0.299323	0.674	0.479	1	FB & eye.1	eif4h
kpnb32	0.00060417	0.254108	0.707	0.516	1	FB & eye.1	kpnb3
gcn1	0.00061456	0.293529	0.598	0.443	1	FB & eye.1	gcn1
prickle1b	0.000639859	0.370198	0.478	0.307	1	FB & eye.1	prickle1b
camk2g11	0.000674692	0.302686	0.641	0.496	1	FB & eye.1	camk2g1
adka1	0.000740769	0.28853	0.783	0.651	1	FB & eye.1	adka
stau2	0.000748128	0.311332	0.717	0.582	1	FB & eye.1	stau2
srpk1b	0.00086907	0.259323	0.674	0.488	1	FB & eye.1	srpk1b
hsp90ab11	0.000910106	0.255386	0.891	0.821	1	FB & eye.1	hsp90ab1
tmem131l2	0.000980547	0.261524	0.62	0.453	1	FB & eye.1	tmem131l
mycn1	0.00104127	0.260626	0.38	0.239	1	FB & eye.1	mycn
slc4a7	0.00107748	0.26781	0.489	0.328	1	FB & eye.1	slc4a7
eif4g1a	0.00113457	0.265749	0.859	0.741	1	FB & eye.1	eif4g1a
gtpbp4	0.00161727	0.291503	0.5	0.373	1	FB & eye.1	gtpbp4
si:dkey-239h2.3	0.00170548	0.306166	0.674	0.539	1	FB & eye.1	si:dkey-239h2.3
supt3h	0.00197411	0.266585	0.478	0.333	1	FB & eye.1	supt3h
immp2l1	0.0019918	0.330122	0.435	0.295	1	FB & eye.1	immp2l
metap1	0.00267112	0.28887	0.565	0.448	1	FB & eye.1	metap1
nap1l11	0.00290069	0.257798	0.707	0.547	1	FB & eye.1	nap1l1
eef1g1	0.00315304	0.259687	0.717	0.569	1	FB & eye.1	eef1g
nop561	0.00342778	0.256304	0.837	0.791	1	FB & eye.1	nop56
pwp2h	0.00349017	0.257374	0.728	0.594	1	FB & eye.1	pwp2h
pdik1l	0.00351933	0.27288	0.478	0.333	1	FB & eye.1	pdik1l
fam172a1	0.00476714	0.301229	0.554	0.424	1	FB & eye.1	fam172a
bard1	0.00514299	0.308855	0.391	0.267	1	FB & eye.1	bard1
acin1b	0.00594598	0.271438	0.696	0.581	1	FB & eye.1	acin1b
ttc271	0.00597229	0.260582	0.467	0.344	1	FB & eye.1	ttc27
rptor	0.00743749	0.252982	0.565	0.473	1	FB & eye.1	rptor
dph1	0.0099231	0.253265	0.522	0.425	1	FB & eye.1	dph1
rbpms2a	8.88711e-121	1.15763	0.484	0.011	1.58973e-116	Vasc & heart	rbpms2a
nrp1b	8.82234e-104	0.831733	0.363	0.004	1.57814e-99	Vasc & heart	nrp1b
gata5	2.0173e-98	1.06398	0.451	0.015	3.60855e-94	Vasc & heart	gata5
osr1	2.77817e-71	0.697758	0.352	0.013	4.96959e-67	Vasc & heart	osr1
tmem88a	1.25063e-63	0.598282	0.264	0.006	2.23712e-59	Vasc & heart	tmem88a
cdh11	3.5285e-61	2.4052	0.879	0.204	6.31177e-57	Vasc & heart	cdh11
bmp6	3.94221e-61	1.39567	0.407	0.028	7.05182e-57	Vasc & heart	bmp6
tbx20	6.08153e-55	0.640108	0.176	0.001	1.08786e-50	Vasc & heart	tbx20
fli1a	1.30968e-53	1.08968	0.352	0.024	2.34275e-49	Vasc & heart	fli1a
tal1	7.75137e-51	0.66213	0.143	0	1.38656e-46	Vasc & heart	tal1
id31	4.72947e-50	1.16685	0.736	0.147	8.46007e-46	Vasc & heart	id3
cxcl12a	3.54127e-49	1.47534	0.604	0.099	6.33462e-45	Vasc & heart	cxcl12a
zfpm11	2.394e-48	1.75829	0.648	0.123	4.28238e-44	Vasc & heart	zfpm1
drll.1	5.5766e-47	0.373926	0.143	0.001	9.97542e-43	Vasc & heart	drll.1
fbln1	4.65497e-45	0.648313	0.275	0.016	8.32681e-41	Vasc & heart	fbln1
lsp1a	3.07503e-43	1.20175	0.626	0.117	5.50061e-39	Vasc & heart	lsp1a
fgf10b	9.19173e-42	0.576021	0.242	0.013	1.64422e-37	Vasc & heart	fgf10b
etv2	9.21493e-41	0.912023	0.165	0.004	1.64837e-36	Vasc & heart	etv2
drl	1.92771e-39	0.273565	0.11	0	3.44829e-35	Vasc & heart	drl
drll.2	2.29805e-39	0.334008	0.121	0.001	4.11075e-35	Vasc & heart	drll.2
pcdh10a	2.58415e-39	0.344659	0.154	0.003	4.62252e-35	Vasc & heart	pcdh10a
cxcl12b	1.9672e-38	0.991527	0.484	0.075	3.51893e-34	Vasc & heart	cxcl12b
fgfrl1b	4.17155e-38	0.750926	0.308	0.028	7.46207e-34	Vasc & heart	fgfrl1b
pdgfra	4.69755e-38	0.940626	0.451	0.066	8.40298e-34	Vasc & heart	pdgfra
nrp2b1	4.9343e-38	1.81537	0.956	0.463	8.82647e-34	Vasc & heart	nrp2b
bmper	6.35392e-38	1.30512	0.396	0.051	1.13659e-33	Vasc & heart	bmper
kcnd3	7.60351e-38	0.728849	0.231	0.013	1.36012e-33	Vasc & heart	kcnd3
lmo2	5.77014e-35	0.749075	0.198	0.01	1.03216e-30	Vasc & heart	lmo2
pcdh12	7.93071e-35	0.420786	0.231	0.015	1.41865e-30	Vasc & heart	pcdh12
myo10l3	9.97834e-35	1.52187	0.791	0.274	1.78492e-30	Vasc & heart	myo10l3
piwil2	2.0982e-33	0.283855	0.121	0.002	3.75326e-29	Vasc & heart	piwil2
sema5bb	1.12151e-32	0.472141	0.396	0.055	2.00616e-28	Vasc & heart	sema5bb
itga4	7.79276e-30	0.560361	0.253	0.024	1.39397e-25	Vasc & heart	itga4
wt1a	9.36258e-30	0.316812	0.11	0.002	1.67478e-25	Vasc & heart	wt1a
nkx2.7	7.91699e-29	0.470934	0.209	0.016	1.41619e-24	Vasc & heart	nkx2.7
si:ch73-22o12.11	1.17392e-28	1.32935	0.56	0.15	2.09991e-24	Vasc & heart	si:ch73-22o12.1
ccdc85ca	3.96058e-28	0.805726	0.44	0.085	7.08468e-24	Vasc & heart	ccdc85ca
nrp1a1	3.48772e-25	1.00277	0.495	0.122	6.23883e-21	Vasc & heart	nrp1a
snai1b	7.24379e-25	0.818194	0.462	0.101	1.29577e-20	Vasc & heart	snai1b
tbx1	9.4905e-25	0.82035	0.253	0.031	1.69766e-20	Vasc & heart	tbx1
si:ch211-106e7.2	2.89853e-24	0.817087	0.615	0.193	5.18489e-20	Vasc & heart	si:ch211-106e7.2
pde11al	3.81159e-24	0.710412	0.286	0.04	6.81817e-20	Vasc & heart	pde11al
lima1a1	6.29187e-24	0.837992	0.769	0.292	1.12549e-19	Vasc & heart	lima1a
foxh1	7.39218e-23	0.509525	0.319	0.054	1.32231e-18	Vasc & heart	foxh1
setx	8.19304e-23	1.3778	0.681	0.292	1.46557e-18	Vasc & heart	setx
fstl1a	9.88283e-23	0.51897	0.33	0.056	1.76784e-18	Vasc & heart	fstl1a
fhl3a	1.26937e-22	0.844048	0.626	0.204	2.27065e-18	Vasc & heart	fhl3a
tpm4a1	1.41312e-21	0.650091	0.429	0.101	2.52779e-17	Vasc & heart	tpm4a
tgfbr3	5.51867e-21	0.841639	0.297	0.051	9.8718e-17	Vasc & heart	tgfbr3
trim35-7.1	8.20396e-21	0.603973	0.374	0.083	1.46752e-16	Vasc & heart	trim35-7.1
si:ch211-199g17.21	1.15224e-20	0.96953	0.571	0.185	2.06113e-16	Vasc & heart	si:ch211-199g17.2
gse1	2.17353e-20	1.08578	0.835	0.463	3.88802e-16	Vasc & heart	gse1
tmem88b	1.49897e-19	0.402756	0.22	0.029	2.68136e-15	Vasc & heart	tmem88b
kank2	1.57653e-19	0.411766	0.352	0.073	2.82009e-15	Vasc & heart	kank2
si:ch73-190f9.4	9.0849e-19	0.261005	0.165	0.017	1.62511e-14	Vasc & heart	si:ch73-190f9.4
kirrel1b	1.12799e-18	0.503372	0.209	0.028	2.01774e-14	Vasc & heart	kirrel1b
plxnb2a.11	2.38226e-18	0.704715	0.549	0.186	4.26139e-14	Vasc & heart	plxnb2a.1
eva1a	5.2654e-18	0.559165	0.22	0.033	9.41874e-14	Vasc & heart	eva1a
runx1t1	7.51109e-18	0.405511	0.132	0.011	1.34358e-13	Vasc & heart	runx1t1
fn1a1	1.53819e-17	1.3326	0.736	0.329	2.75152e-13	Vasc & heart	fn1a
crim1	1.85335e-17	0.635563	0.352	0.084	3.31527e-13	Vasc & heart	crim1
si:ch211-246m6.5.1	2.13449e-17	0.898133	0.505	0.169	3.81817e-13	Vasc & heart	si:ch211-246m6.5.1
plxnb2a	4.82525e-17	0.469692	0.264	0.05	8.6314e-13	Vasc & heart	plxnb2a
si:dkey-71l4.5	6.37643e-17	0.315538	0.253	0.044	1.14062e-12	Vasc & heart	si:dkey-71l4.5
adam12	1.19052e-16	0.929813	0.286	0.061	2.1296e-12	Vasc & heart	adam12
dok41	1.45587e-16	0.433281	0.341	0.077	2.60425e-12	Vasc & heart	dok4
slc9a3r1a	1.55339e-16	0.874937	0.352	0.093	2.77871e-12	Vasc & heart	slc9a3r1a
lsp1b1	2.17074e-16	0.686851	0.659	0.278	3.88302e-12	Vasc & heart	lsp1b
plxna2	2.80433e-16	0.601158	0.484	0.148	5.01639e-12	Vasc & heart	plxna2
fbn2b1	3.99327e-16	0.706379	0.67	0.284	7.14316e-12	Vasc & heart	fbn2b
lbx2	4.53431e-16	0.46825	0.187	0.027	8.11097e-12	Vasc & heart	lbx2
sobpa	1.02675e-15	0.259193	0.143	0.015	1.83665e-11	Vasc & heart	sobpa
si:ch211-1e14.1	2.40186e-15	0.370504	0.264	0.054	4.29644e-11	Vasc & heart	si:ch211-1e14.1
efnb3a	4.58303e-15	0.859133	0.571	0.246	8.19812e-11	Vasc & heart	efnb3a
itga9	1.07311e-14	0.789871	0.516	0.189	1.91959e-10	Vasc & heart	itga9
pax2a1	1.41691e-14	1.01661	0.363	0.1	2.53456e-10	Vasc & heart	pax2a
si:dkey-73n10.1	1.86549e-14	0.276093	0.187	0.029	3.33699e-10	Vasc & heart	si:dkey-73n10.1
zcchc24	7.69642e-14	0.632822	0.352	0.094	1.37674e-09	Vasc & heart	zcchc24
colec12	8.31272e-14	0.512446	0.253	0.055	1.48698e-09	Vasc & heart	colec12
smad91	9.59973e-14	0.341315	0.341	0.091	1.7172e-09	Vasc & heart	smad9
arhgef41	1.45453e-13	0.454393	0.33	0.09	2.60187e-09	Vasc & heart	arhgef4
smad71	1.52146e-13	0.558458	0.495	0.184	2.72158e-09	Vasc & heart	smad7
rbfox3a	1.8201e-13	0.975115	0.374	0.118	3.2558e-09	Vasc & heart	rbfox3a
fmnl3	2.01182e-13	0.767083	0.571	0.25	3.59874e-09	Vasc & heart	fmnl3
dlc12	2.08072e-13	0.58487	0.571	0.234	3.72199e-09	Vasc & heart	dlc1
si:dkey-261h17.1	3.1592e-13	0.569226	0.56	0.214	5.65118e-09	Vasc & heart	si:dkey-261h17.1
enpp2	1.56651e-12	0.361275	0.22	0.046	2.80217e-08	Vasc & heart	enpp2
neo1a	2.17876e-12	0.863286	0.923	0.811	3.89737e-08	Vasc & heart	neo1a
pttg1ipb	3.2182e-12	0.286246	0.231	0.051	5.75672e-08	Vasc & heart	pttg1ipb
grid1a	3.47502e-12	0.406243	0.187	0.035	6.21612e-08	Vasc & heart	grid1a
rapgefl1	4.63014e-12	0.302638	0.22	0.047	8.28239e-08	Vasc & heart	rapgefl1
sat1a.2	5.85233e-12	0.297597	0.198	0.04	1.04686e-07	Vasc & heart	sat1a.2
p3h2	1.57936e-11	0.652945	0.374	0.127	2.82515e-07	Vasc & heart	p3h2
phldb2a	1.96362e-11	0.301184	0.165	0.029	3.51252e-07	Vasc & heart	phldb2a
f3a1	1.97233e-11	0.286246	0.209	0.045	3.5281e-07	Vasc & heart	f3a
si:dkey-222b8.1.1	3.44185e-11	0.3366	0.231	0.056	6.15677e-07	Vasc & heart	si:dkey-222b8.1.1
si:dkeyp-14d3.1	3.96687e-11	0.355197	0.198	0.042	7.09593e-07	Vasc & heart	si:dkeyp-14d3.1
notch21	4.90102e-11	0.336041	0.429	0.153	8.76694e-07	Vasc & heart	notch2
tspan18b	6.15652e-11	0.402684	0.308	0.093	1.10128e-06	Vasc & heart	tspan18b
ripply1	6.86255e-11	0.696743	0.341	0.116	1.22757e-06	Vasc & heart	ripply1
whrnb1	8.42665e-11	0.517345	0.297	0.09	1.50736e-06	Vasc & heart	whrnb
lpcat1	1.85099e-10	0.642203	0.516	0.246	3.31105e-06	Vasc & heart	lpcat1
wnk1b1	1.99397e-10	0.6742	0.385	0.152	3.56682e-06	Vasc & heart	wnk1b
arid3c	1.99483e-10	0.737913	0.813	0.491	3.56835e-06	Vasc & heart	arid3c
gfra1a	2.19483e-10	0.713788	0.187	0.041	3.92611e-06	Vasc & heart	gfra1a
ptp4a2b1	2.98166e-10	0.54477	0.67	0.372	5.33359e-06	Vasc & heart	ptp4a2b
adgra1a	5.73341e-10	0.756086	0.132	0.022	1.02559e-05	Vasc & heart	adgra1a
foxn3	6.09254e-10	0.335957	0.275	0.081	1.08983e-05	Vasc & heart	foxn3
vox	6.34586e-10	0.537418	0.473	0.198	1.13515e-05	Vasc & heart	vox
ism2a	1.45365e-09	0.313409	0.132	0.023	2.60029e-05	Vasc & heart	ism2a
aldh1a2	3.14435e-09	0.262643	0.209	0.053	5.62462e-05	Vasc & heart	aldh1a2
adamts6	3.36474e-09	0.587506	0.231	0.067	6.01885e-05	Vasc & heart	adamts6
hs6st1b	3.42883e-09	0.455417	0.374	0.149	6.1335e-05	Vasc & heart	hs6st1b
carhsp1	4.6845e-09	0.276929	0.308	0.105	8.37963e-05	Vasc & heart	carhsp1
smad6b1	4.826e-09	0.847984	0.604	0.356	8.63274e-05	Vasc & heart	smad6b
farp2	4.86539e-09	0.883473	0.637	0.435	8.70321e-05	Vasc & heart	farp2
mef2cb	6.14007e-09	0.662372	0.132	0.025	0.000109834	Vasc & heart	mef2cb
ppp1r9ba	6.30488e-09	0.472116	0.418	0.187	0.000112782	Vasc & heart	ppp1r9ba
CU468041.2	7.39664e-09	0.329127	0.154	0.033	0.000132311	Vasc & heart	CU468041.2
tnnt3b	7.69066e-09	0.406632	0.319	0.117	0.00013757	Vasc & heart	tnnt3b
hhip	9.92803e-09	0.544798	0.374	0.152	0.000177593	Vasc & heart	hhip
meis31	1.0223e-08	0.619802	0.374	0.15	0.000182869	Vasc & heart	meis3
nhsb1	1.39576e-08	0.582671	0.462	0.223	0.000249673	Vasc & heart	nhsb
mtus1b1	1.44756e-08	0.255717	0.165	0.038	0.000258939	Vasc & heart	mtus1b
nckap5l1	1.57473e-08	0.540221	0.56	0.31	0.000281688	Vasc & heart	nckap5l
tiparp1	2.08429e-08	0.610624	0.473	0.237	0.000372838	Vasc & heart	tiparp
elk3	3.85404e-08	0.314716	0.253	0.083	0.00068941	Vasc & heart	elk3
itga5	4.54259e-08	0.573726	0.56	0.314	0.000812579	Vasc & heart	itga5
trabd2b	5.21155e-08	0.302016	0.143	0.032	0.000932241	Vasc & heart	trabd2b
sptan1	5.47203e-08	0.563633	0.747	0.52	0.000978837	Vasc & heart	sptan1
pth2ra1	9.63232e-08	0.391141	0.176	0.047	0.00172303	Vasc & heart	pth2ra
soga1	1.13464e-07	0.472467	0.593	0.33	0.00202965	Vasc & heart	soga1
mrc2	2.05859e-07	0.486349	0.396	0.19	0.00368241	Vasc & heart	mrc2
acsl1a	2.12094e-07	0.290735	0.231	0.077	0.00379394	Vasc & heart	acsl1a
plk3	2.30649e-07	0.481721	0.319	0.134	0.00412585	Vasc & heart	plk3
cited4a	2.60227e-07	0.300512	0.297	0.115	0.00465495	Vasc & heart	cited4a
ptprga	2.97072e-07	0.536235	0.538	0.299	0.00531402	Vasc & heart	ptprga
fmnl2a1	3.5321e-07	0.374793	0.253	0.091	0.00631822	Vasc & heart	fmnl2a
gdpd5b	4.2416e-07	0.38221	0.374	0.168	0.00758737	Vasc & heart	gdpd5b
akap12b1	5.29982e-07	0.459076	0.725	0.48	0.00948032	Vasc & heart	akap12b
rassf7a	5.9568e-07	0.317673	0.231	0.079	0.0106555	Vasc & heart	rassf7a
si:ch73-299h12.3	6.14768e-07	0.275335	0.231	0.08	0.010997	Vasc & heart	si:ch73-299h12.3
ttn.2	6.49724e-07	0.586647	0.176	0.051	0.0116223	Vasc & heart	ttn.2
hmcn2.1	7.08341e-07	0.611489	0.681	0.439	0.0126708	Vasc & heart	hmcn2.1
nrp2a	8.52764e-07	0.293331	0.22	0.074	0.0152542	Vasc & heart	nrp2a
CU571061.11	8.96392e-07	0.446956	0.231	0.083	0.0160347	Vasc & heart	CU571061.1
lama11	9.36257e-07	0.519082	0.725	0.527	0.0167478	Vasc & heart	lama1
pcca	1.02709e-06	0.403182	0.484	0.262	0.0183725	Vasc & heart	pcca
sh3pxd2b	1.05541e-06	0.276554	0.308	0.128	0.0188792	Vasc & heart	sh3pxd2b
gata2a1	1.24604e-06	0.307714	0.286	0.111	0.0222892	Vasc & heart	gata2a
tjp1b	1.25968e-06	0.951037	0.593	0.453	0.0225332	Vasc & heart	tjp1b
caska	1.3305e-06	0.539099	0.648	0.437	0.0237999	Vasc & heart	caska
cdh13	1.36971e-06	0.26419	0.154	0.043	0.0245014	Vasc & heart	cdh13
rnf145a	1.62855e-06	0.604315	0.495	0.289	0.0291315	Vasc & heart	rnf145a
bcor	2.06729e-06	0.510473	0.538	0.325	0.0369797	Vasc & heart	bcor
itsn1	2.17659e-06	0.376566	0.67	0.428	0.0389348	Vasc & heart	itsn1
nos1apa.11	2.27877e-06	0.754121	0.626	0.425	0.0407627	Vasc & heart	nos1apa.1
astn1	2.40172e-06	0.346544	0.154	0.045	0.042962	Vasc & heart	astn1
pdzrn3b1	2.58004e-06	0.535222	0.44	0.23	0.0461518	Vasc & heart	pdzrn3b
afap1	2.828e-06	0.515262	0.396	0.201	0.0505872	Vasc & heart	afap1
vasna	3.18668e-06	0.287492	0.22	0.08	0.0570034	Vasc & heart	vasna
rarab1	3.27621e-06	0.344257	0.725	0.481	0.0586049	Vasc & heart	rarab
tiam1b1	3.65106e-06	0.509879	0.615	0.413	0.0653101	Vasc & heart	tiam1b
si:dkey-68o6.5	3.93277e-06	0.287764	0.385	0.183	0.0703494	Vasc & heart	si:dkey-68o6.5
smoc21	4.43083e-06	0.399404	0.176	0.057	0.0792587	Vasc & heart	smoc2
cfap57	5.55379e-06	0.251699	0.143	0.041	0.0993462	Vasc & heart	cfap57
anks1b	5.93416e-06	0.346598	0.231	0.09	0.10615	Vasc & heart	anks1b
cd81a1	6.25087e-06	0.387503	0.725	0.507	0.111816	Vasc & heart	cd81a
nkd12	6.4797e-06	0.669348	0.495	0.331	0.115909	Vasc & heart	nkd1
arrb2b1	6.75633e-06	0.423231	0.385	0.205	0.120857	Vasc & heart	arrb2b
ccnjl	9.54667e-06	0.544367	0.659	0.47	0.170771	Vasc & heart	ccnjl
cdc42ep4a	1.36206e-05	0.478478	0.374	0.201	0.243646	Vasc & heart	cdc42ep4a
scml2	1.48316e-05	0.330277	0.626	0.392	0.265307	Vasc & heart	scml2
rnd3a	2.06977e-05	0.299136	0.407	0.218	0.37024	Vasc & heart	rnd3a
myo9aa	2.25403e-05	0.517345	0.451	0.279	0.403201	Vasc & heart	myo9aa
nradd	3.05954e-05	0.520009	0.56	0.348	0.547291	Vasc & heart	nradd
FRMD11	3.52401e-05	0.357825	0.242	0.106	0.630374	Vasc & heart	FRMD1
ddah2	5.68888e-05	0.268389	0.231	0.102	1	Vasc & heart	ddah2
fam214a	5.79964e-05	0.258611	0.396	0.218	1	Vasc & heart	fam214a
wnt8a.1	5.85471e-05	0.292792	0.297	0.141	1	Vasc & heart	wnt8a.1
fsta	6.44225e-05	0.305124	0.132	0.042	1	Vasc & heart	fsta
hk1	7.03228e-05	0.385903	0.385	0.22	1	Vasc & heart	hk1
yrk	7.20006e-05	0.277141	0.121	0.036	1	Vasc & heart	yrk
agap1	0.000119934	0.325733	0.791	0.669	1	Vasc & heart	agap1
nxn3	0.000120768	0.483698	0.67	0.523	1	Vasc & heart	nxn
sptlc2a	0.000122644	0.393963	0.242	0.115	1	Vasc & heart	sptlc2a
cblb	0.000144275	0.32075	0.264	0.128	1	Vasc & heart	cblb
bmpr2b1	0.000163434	0.261844	0.604	0.407	1	Vasc & heart	bmpr2b
trim33	0.000165383	0.396763	0.637	0.483	1	Vasc & heart	trim33
ypel1	0.000176387	0.345894	0.286	0.147	1	Vasc & heart	ypel1
ube2e3	0.000181786	0.381237	0.681	0.542	1	Vasc & heart	ube2e3
prex2	0.000198672	0.375506	0.264	0.131	1	Vasc & heart	prex2
rnf24	0.000218096	0.357583	0.341	0.187	1	Vasc & heart	rnf24
asap1a	0.000232534	0.49045	0.615	0.494	1	Vasc & heart	asap1a
kdm6ba	0.000256331	0.347024	0.802	0.664	1	Vasc & heart	kdm6ba
prex1	0.000267551	0.408454	0.33	0.191	1	Vasc & heart	prex1
col12a1a	0.000311742	0.261005	0.385	0.228	1	Vasc & heart	col12a1a
pcbp4	0.000332383	0.42313	0.297	0.165	1	Vasc & heart	pcbp4
raraa1	0.000358945	0.273579	0.648	0.413	1	Vasc & heart	raraa
cnn3a	0.000362073	0.301839	0.297	0.163	1	Vasc & heart	cnn3a
sept9a	0.000414657	0.274965	0.22	0.104	1	Vasc & heart	sept9a
il11ra	0.00043045	0.325185	0.396	0.246	1	Vasc & heart	il11ra
mta3	0.000504329	0.422795	0.593	0.486	1	Vasc & heart	mta3
fkbp9	0.000519549	0.26057	0.429	0.265	1	Vasc & heart	fkbp9
pik3r3b	0.000526471	0.298202	0.22	0.11	1	Vasc & heart	pik3r3b
chsy11	0.000582846	0.476232	0.857	0.736	1	Vasc & heart	chsy1
wnt5b	0.000595293	0.520268	0.44	0.299	1	Vasc & heart	wnt5b
fam184a	0.000638872	0.275811	0.165	0.07	1	Vasc & heart	fam184a
phldb1b1	0.000706801	0.264045	0.637	0.464	1	Vasc & heart	phldb1b
anln	0.000780033	0.284828	0.352	0.209	1	Vasc & heart	anln
DDX17	0.000781308	0.283985	0.758	0.615	1	Vasc & heart	DDX17
suco	0.000844364	0.332279	0.429	0.294	1	Vasc & heart	suco
arfip11	0.000918955	0.261252	0.308	0.18	1	Vasc & heart	arfip1
lef11	0.00100065	0.375146	0.549	0.374	1	Vasc & heart	lef1
cxadr1	0.00103286	0.401868	0.505	0.364	1	Vasc & heart	cxadr
nid2a1	0.00108959	0.307484	0.571	0.375	1	Vasc & heart	nid2a
ralgapa1	0.00116289	0.289678	0.626	0.456	1	Vasc & heart	ralgapa1
cxxc5b1	0.00126988	0.271422	0.297	0.169	1	Vasc & heart	cxxc5b
tle3a	0.00128153	0.370021	0.527	0.394	1	Vasc & heart	tle3a
adgrl2a2	0.00133876	0.333044	0.934	0.924	1	Vasc & heart	adgrl2a
stox1	0.00150122	0.318812	0.242	0.131	1	Vasc & heart	stox1
dek	0.0016506	0.260306	0.374	0.236	1	Vasc & heart	dek
ZNF335	0.00190084	0.281573	0.484	0.328	1	Vasc & heart	ZNF335
tanc1b	0.0019283	0.336291	0.626	0.491	1	Vasc & heart	tanc1b
hoxb3a	0.00221169	0.440059	0.407	0.269	1	Vasc & heart	hoxb3a
tia1	0.00234803	0.264243	0.495	0.361	1	Vasc & heart	tia1
osbpl3b	0.00244873	0.257754	0.275	0.157	1	Vasc & heart	osbpl3b
ldb1a	0.00254051	0.261485	0.681	0.541	1	Vasc & heart	ldb1a
pbx4	0.00303288	0.276008	0.736	0.672	1	Vasc & heart	pbx4
eif4ebp3l	0.00318087	0.277414	0.352	0.226	1	Vasc & heart	eif4ebp3l
tead1b1	0.00460602	0.538901	0.604	0.525	1	Vasc & heart	tead1b
zgc:174862	0.00475981	0.251451	0.659	0.499	1	Vasc & heart	zgc:174862
serpinh1b	0.00491808	0.250123	0.582	0.434	1	Vasc & heart	serpinh1b
srsf4	0.00493594	0.253834	0.681	0.557	1	Vasc & heart	srsf4
cct8	0.00496277	0.251554	0.33	0.217	1	Vasc & heart	cct8
pbx1b	0.00550702	0.398631	0.176	0.092	1	Vasc & heart	pbx1b
tcf12	0.00632286	0.30322	0.33	0.21	1	Vasc & heart	tcf12
shroom41	0.00640584	0.28463	0.527	0.402	1	Vasc & heart	shroom4
sept7b	0.00735865	0.273178	0.418	0.295	1	Vasc & heart	sept7b
nkain4	0.00766099	0.337716	0.637	0.491	1	Vasc & heart	nkain4
ptbp2b	0.00841507	0.267567	0.462	0.351	1	Vasc & heart	ptbp2b
bach2b	0.00845336	0.303991	0.495	0.359	1	Vasc & heart	bach2b
tmem198a1	0.00867908	0.257212	0.396	0.279	1	Vasc & heart	tmem198a
tbx16l	5.06338e-148	1.81994	0.833	0.044	9.05737e-144	Somite.1	tbx16l
msgn1	5.70584e-138	2.43037	0.917	0.069	1.02066e-133	Somite.1	msgn1
tbx16	1.18028e-103	2.2105	0.929	0.108	2.11129e-99	Somite.1	tbx16
fn1b	3.8719e-99	2.20125	0.964	0.13	6.92605e-95	Somite.1	fn1b
rbm38	4.16513e-88	2.18151	0.94	0.145	7.45058e-84	Somite.1	rbm38
pcdh8	1.44163e-72	1.12958	0.631	0.059	2.57879e-68	Somite.1	pcdh8
XKR4	5.25212e-63	2.74141	0.964	0.239	9.39498e-59	Somite.1	XKR4
tob1a	4.68981e-59	1.0607	0.702	0.105	8.38913e-55	Somite.1	tob1a
mgst1.2	8.49164e-59	0.482993	0.238	0.005	1.51898e-54	Somite.1	mgst1.2
her1	2.61438e-58	1.11289	0.56	0.059	4.67661e-54	Somite.1	her1
vent	6.00746e-58	1.19167	0.69	0.099	1.07461e-53	Somite.1	vent
plekhn1	1.65214e-56	0.98017	0.488	0.046	2.95535e-52	Somite.1	plekhn1
jcada	3.5294e-55	0.788689	0.476	0.044	6.3134e-51	Somite.1	jcada
hspa12a	5.35211e-53	1.18815	0.738	0.132	9.57385e-49	Somite.1	hspa12a
myf5	1.79964e-52	0.686797	0.417	0.033	3.2192e-48	Somite.1	myf5
dlc	8.60135e-52	1.27929	0.56	0.071	1.53861e-47	Somite.1	dlc
samd10b	9.80432e-52	1.32401	0.536	0.062	1.7538e-47	Somite.1	samd10b
hes6	3.64025e-50	1.30886	0.905	0.243	6.51168e-46	Somite.1	hes6
hoxc3a	6.69955e-49	1.86351	1	0.317	1.19842e-44	Somite.1	hoxc3a
her7	5.23517e-45	0.720298	0.393	0.036	9.36466e-41	Somite.1	her7
lef12	5.73384e-44	1.55955	0.976	0.352	1.02567e-39	Somite.1	lef1
zgc:152968	1.51292e-43	0.455591	0.202	0.006	2.7063e-39	Somite.1	zgc:152968
pimr201	2.55611e-43	0.283198	0.202	0.006	4.57238e-39	Somite.1	pimr201
vox1	3.37752e-42	1.10724	0.786	0.183	6.04172e-38	Somite.1	vox
cdx1a	4.61182e-42	0.986981	0.655	0.121	8.24963e-38	Somite.1	cdx1a
rxraa	1.72345e-41	1.13239	0.667	0.137	3.0829e-37	Somite.1	rxraa
kcnj19a	7.08873e-41	0.649253	0.452	0.055	1.26803e-36	Somite.1	kcnj19a
has2	7.81258e-41	0.712767	0.417	0.046	1.39751e-36	Somite.1	has2
hoxc6b	8.35428e-41	1.202	0.845	0.208	1.49441e-36	Somite.1	hoxc6b
itm2cb	3.02916e-40	0.935254	0.595	0.108	5.41856e-36	Somite.1	itm2cb
rem1	6.1977e-40	0.889325	0.345	0.032	1.10864e-35	Somite.1	rem1
phkg2	7.81653e-40	0.817237	0.5	0.076	1.39822e-35	Somite.1	phkg2
pcdh1a	1.1816e-39	0.696046	0.381	0.039	2.11365e-35	Somite.1	pcdh1a
mllt3	1.25715e-38	1.58465	0.905	0.298	2.2488e-34	Somite.1	mllt3
lpar1	4.55072e-38	0.966098	0.667	0.135	8.14033e-34	Somite.1	lpar1
evx1	5.08703e-38	0.99854	0.738	0.166	9.09967e-34	Somite.1	evx1
LO016987.2	6.79495e-38	1.04347	0.75	0.189	1.21548e-33	Somite.1	LO016987.2
hoxb7a	8.36869e-38	1.1361	0.714	0.164	1.49699e-33	Somite.1	hoxb7a
sox51	6.9977e-37	1.29336	0.881	0.29	1.25175e-32	Somite.1	sox5
phc2a	2.84769e-36	1.34131	0.929	0.338	5.09395e-32	Somite.1	phc2a
plp2	4.75753e-36	0.865081	0.536	0.094	8.51027e-32	Somite.1	plp2
scinlb	1.50115e-34	0.712767	0.405	0.054	2.68526e-30	Somite.1	scinlb
greb1	1.95657e-34	1.28895	0.905	0.341	3.49991e-30	Somite.1	greb1
il17rd	1.59363e-33	1.29559	0.952	0.427	2.85069e-29	Somite.1	il17rd
wnt5b1	2.2457e-33	1.31274	0.833	0.278	4.01711e-29	Somite.1	wnt5b
ism1	5.49767e-33	0.773979	0.5	0.085	9.83424e-29	Somite.1	ism1
RTKN	9.63069e-33	0.76168	0.583	0.124	1.72274e-28	Somite.1	RTKN
zgc:56585	6.88626e-32	0.580809	0.369	0.048	1.23181e-27	Somite.1	zgc:56585
her12	8.74881e-32	0.608704	0.464	0.076	1.56499e-27	Somite.1	her12
unc45b	3.22742e-31	0.655135	0.405	0.056	5.77322e-27	Somite.1	unc45b
piwil1	3.56737e-30	0.33582	0.31	0.034	6.38131e-26	Somite.1	piwil1
hivep2a	1.15261e-29	0.683456	0.476	0.085	2.06179e-25	Somite.1	hivep2a
six4a	1.46215e-29	0.47421	0.274	0.027	2.6155e-25	Somite.1	six4a
cdx4	4.17441e-29	1.06632	0.774	0.255	7.46719e-25	Somite.1	cdx4
LO016987.1	1.30135e-28	0.481794	0.381	0.058	2.32786e-24	Somite.1	LO016987.1
shdb	2.32884e-28	1.14432	0.702	0.226	4.16583e-24	Somite.1	shdb
fzd10	3.38558e-28	0.523792	0.369	0.055	6.05613e-24	Somite.1	fzd10
timm50	8.01875e-28	1.22423	0.726	0.248	1.43439e-23	Somite.1	timm50
si:dkey-261h17.11	1.35115e-27	0.815551	0.726	0.206	2.41693e-23	Somite.1	si:dkey-261h17.1
grin2da	2.52474e-27	0.479894	0.262	0.027	4.51626e-23	Somite.1	grin2da
hoxb6b	8.68962e-27	0.621507	0.464	0.09	1.5544e-22	Somite.1	hoxb6b
sulf1	2.34526e-26	1.19251	0.833	0.31	4.19521e-22	Somite.1	sulf1
atp2a2a1	2.00157e-25	0.67043	0.488	0.103	3.58042e-21	Somite.1	atp2a2a
hoxa9a	2.40805e-25	0.579198	0.488	0.103	4.30751e-21	Somite.1	hoxa9a
fam222ba	5.9892e-25	0.497162	0.381	0.066	1.07135e-20	Somite.1	fam222ba
spon1b	2.85426e-24	0.882182	0.381	0.069	5.1057e-20	Somite.1	spon1b
trps11	1.27973e-23	1.31148	0.881	0.542	2.28918e-19	Somite.1	trps1
gli2a	1.30136e-23	1.09077	0.976	0.755	2.32787e-19	Somite.1	gli2a
antxr2a	1.3743e-23	0.454602	0.238	0.027	2.45835e-19	Somite.1	antxr2a
si:dkey-235d18.5	1.61819e-23	0.682737	0.345	0.06	2.89463e-19	Somite.1	si:dkey-235d18.5
ext1b	1.27141e-22	1.03577	0.857	0.48	2.2743e-18	Somite.1	ext1b
fn1a2	1.91811e-22	0.904565	0.833	0.326	3.43111e-18	Somite.1	fn1a
rarab2	3.74367e-22	1.47198	0.833	0.476	6.69667e-18	Somite.1	rarab
pde4cb	1.82557e-21	0.520691	0.357	0.064	3.26558e-17	Somite.1	pde4cb
draxin	3.16296e-20	0.748121	0.417	0.096	5.6579e-16	Somite.1	draxin
lhfpl6	3.2897e-20	0.532036	0.488	0.122	5.88462e-16	Somite.1	lhfpl6
si:ch73-106g13.1	5.30296e-20	0.354949	0.262	0.038	9.48594e-16	Somite.1	si:ch73-106g13.1
znfl1h	5.52224e-20	0.603797	0.488	0.131	9.87819e-16	Somite.1	znfl1h
si:dkey-51a16.9	5.92399e-20	0.390241	0.262	0.039	1.05968e-15	Somite.1	si:dkey-51a16.9
znfl1k	1.05742e-19	0.765413	0.69	0.253	1.89152e-15	Somite.1	znfl1k
fryl1	2.6726e-19	0.847957	0.679	0.271	4.78075e-15	Somite.1	fryl
rarga1	4.10636e-19	0.860161	0.845	0.388	7.34546e-15	Somite.1	rarga
slc4a11	6.51694e-19	0.38558	0.202	0.024	1.16575e-14	Somite.1	slc4a11
CR382300.2	6.81393e-19	0.443078	0.345	0.07	1.21888e-14	Somite.1	CR382300.2
cx43.4	1.11442e-18	0.873429	0.94	0.635	1.99348e-14	Somite.1	cx43.4
egln2	1.13267e-18	0.27093	0.19	0.022	2.02612e-14	Somite.1	egln2
kazna	2.35312e-18	0.64006	0.417	0.106	4.20926e-14	Somite.1	kazna
pstpip2	2.6789e-18	0.33346	0.167	0.017	4.79202e-14	Somite.1	pstpip2
kif26ab	2.82999e-18	1.01421	0.857	0.467	5.06229e-14	Somite.1	kif26ab
fam49al	4.07774e-18	0.594372	0.393	0.096	7.29426e-14	Somite.1	fam49al
itga51	4.70385e-18	0.675689	0.762	0.304	8.41425e-14	Somite.1	itga5
hmcn2.11	4.7862e-18	0.991991	0.81	0.433	8.56156e-14	Somite.1	hmcn2.1
notch1a1	4.91392e-18	0.809999	0.952	0.606	8.79002e-14	Somite.1	notch1a
arhgef37	1.46995e-17	0.578837	0.488	0.146	2.62945e-13	Somite.1	arhgef37
tsku	1.65786e-17	0.426122	0.31	0.061	2.96557e-13	Somite.1	tsku
arid3c1	4.37346e-17	0.909431	0.881	0.489	7.82324e-13	Somite.1	arid3c
nrarpa	4.92835e-17	0.664804	0.571	0.21	8.81583e-13	Somite.1	nrarpa
blf	5.05991e-17	0.282946	0.179	0.021	9.05117e-13	Somite.1	blf
hoxc8a	5.733e-17	0.360638	0.286	0.054	1.02552e-12	Somite.1	hoxc8a
ved1	6.59989e-17	0.695178	0.452	0.131	1.18059e-12	Somite.1	ved
fam222a	8.39416e-17	0.711435	0.643	0.256	1.50155e-12	Somite.1	fam222a
GALNTL6	9.42878e-17	0.548083	0.226	0.035	1.68662e-12	Somite.1	GALNTL6
pid1	1.28015e-16	0.919047	0.667	0.309	2.28993e-12	Somite.1	pid1
inka1b	1.39098e-16	0.452442	0.393	0.1	2.48818e-12	Somite.1	inka1b
sb:cb811	1.51818e-16	0.689512	0.5	0.167	2.71572e-12	Somite.1	sb:cb81
hhip1	1.58866e-16	0.600225	0.488	0.147	2.8418e-12	Somite.1	hhip
raraa2	4.13005e-16	0.829975	0.833	0.404	7.38783e-12	Somite.1	raraa
hoxd3a	7.99515e-16	0.569177	0.44	0.127	1.43017e-11	Somite.1	hoxd3a
nol4la	8.40519e-16	0.340544	0.321	0.07	1.50352e-11	Somite.1	nol4la
fndc3ba	4.95662e-15	0.806185	0.917	0.639	8.86639e-11	Somite.1	fndc3ba
lsp1b2	5.04398e-15	0.726106	0.655	0.28	9.02266e-11	Somite.1	lsp1b
si:dkey-68o6.51	1.43823e-14	0.706118	0.488	0.178	2.5727e-10	Somite.1	si:dkey-68o6.5
si:ch211-246m6.5.11	1.6425e-14	0.607973	0.5	0.171	2.93811e-10	Somite.1	si:ch211-246m6.5.1
necab2	7.03102e-14	0.686914	0.464	0.156	1.25771e-09	Somite.1	necab2
RALGDS	7.35012e-14	0.312198	0.262	0.054	1.31479e-09	Somite.1	RALGDS
FO082779.1	7.45523e-14	0.577192	0.56	0.224	1.33359e-09	Somite.1	FO082779.1
nid2a2	1.20241e-13	0.656143	0.762	0.366	2.15087e-09	Somite.1	nid2a
cables2b	1.42632e-13	0.326734	0.262	0.056	2.55141e-09	Somite.1	cables2b
ca9	3.53517e-13	0.389655	0.274	0.062	6.32372e-09	Somite.1	ca9
igf1rb	6.44523e-13	0.892436	0.762	0.512	1.15292e-08	Somite.1	igf1rb
zcchc241	9.2967e-13	0.523792	0.345	0.096	1.66299e-08	Somite.1	zcchc24
rnf241	1.53992e-12	0.688889	0.476	0.181	2.75461e-08	Somite.1	rnf24
pcmtd1	1.89843e-12	0.445477	0.369	0.111	3.39591e-08	Somite.1	pcmtd1
cxcl12a1	2.15479e-12	0.350002	0.381	0.113	3.85448e-08	Somite.1	cxcl12a
znfl1l	2.56254e-12	0.439789	0.405	0.132	4.58388e-08	Somite.1	znfl1l
rhoub1	5.88589e-12	0.423974	0.357	0.107	1.05287e-07	Somite.1	rhoub
apoc11	6.32521e-12	0.71402	0.69	0.361	1.13145e-07	Somite.1	apoc1
efna1b	1.26803e-11	0.451092	0.31	0.089	2.26825e-07	Somite.1	efna1b
dld	1.53725e-11	0.290747	0.393	0.123	2.74983e-07	Somite.1	dld
ephb3a	2.2758e-11	0.466076	0.667	0.301	4.07094e-07	Somite.1	ephb3a
pdzrn3b2	2.71074e-11	0.478525	0.56	0.224	4.84898e-07	Somite.1	pdzrn3b
magi1b1	5.19151e-11	0.724729	0.679	0.376	9.28657e-07	Somite.1	magi1b
ankrd37	5.66719e-11	0.267821	0.179	0.034	1.01375e-06	Somite.1	ankrd37
mgat1b	5.70456e-11	0.318986	0.298	0.084	1.02043e-06	Somite.1	mgat1b
hoxb5b	5.73532e-11	0.268731	0.214	0.046	1.02593e-06	Somite.1	hoxb5b
fam163ba	1.15296e-10	0.258783	0.131	0.019	2.06242e-06	Somite.1	fam163ba
fgf24	1.15708e-10	0.317341	0.19	0.038	2.06979e-06	Somite.1	fgf24
kdm7aa	1.17791e-10	0.520262	0.512	0.221	2.10705e-06	Somite.1	kdm7aa
sash1a	1.36185e-10	0.748736	0.821	0.599	2.43607e-06	Somite.1	sash1a
fkbp7	1.45166e-10	0.266126	0.214	0.048	2.59673e-06	Somite.1	fkbp7
sema4ba	1.50102e-10	0.371152	0.298	0.087	2.68503e-06	Somite.1	sema4ba
si:ch211-107n13.1	1.54005e-10	0.285632	0.262	0.069	2.75485e-06	Somite.1	si:ch211-107n13.1
bmp41	1.87352e-10	0.360196	0.31	0.09	3.35136e-06	Somite.1	bmp4
adamts18	1.92864e-10	0.573492	0.512	0.22	3.44995e-06	Somite.1	adamts18
hoxb10a	2.02564e-10	0.324166	0.238	0.059	3.62347e-06	Somite.1	hoxb10a
gnai2b	3.03084e-10	0.370204	0.333	0.107	5.42156e-06	Somite.1	gnai2b
tp53i11b	3.19351e-10	0.766167	0.44	0.184	5.71255e-06	Somite.1	tp53i11b
pcsk6	4.04113e-10	0.26244	0.262	0.07	7.22877e-06	Somite.1	pcsk6
cpa6	4.09286e-10	0.36341	0.369	0.121	7.3213e-06	Somite.1	cpa6
ror21	4.38823e-10	0.711914	0.798	0.573	7.84967e-06	Somite.1	ror2
lrp1ab1	5.14059e-10	0.553539	0.881	0.629	9.19549e-06	Somite.1	lrp1ab
ttyh3a	5.53177e-10	0.602888	0.857	0.619	9.89524e-06	Somite.1	ttyh3a
ap3b1a	7.14705e-10	0.514256	0.583	0.282	1.27846e-05	Somite.1	ap3b1a
si:ch73-132f6.5	7.62904e-10	0.255786	0.167	0.033	1.36468e-05	Somite.1	si:ch73-132f6.5
appa	8.25498e-10	0.513116	0.417	0.166	1.47665e-05	Somite.1	appa
lrfn5a	1.08506e-09	0.542407	0.143	0.025	1.94095e-05	Somite.1	lrfn5a
fbxw71	1.17884e-09	0.654229	0.964	0.909	2.10871e-05	Somite.1	fbxw7
zbtb16a2	1.23095e-09	0.558628	0.929	0.68	2.20192e-05	Somite.1	zbtb16a
arl4d	1.30986e-09	0.288248	0.202	0.048	2.34308e-05	Somite.1	arl4d
hipk3a	1.71447e-09	0.597394	0.75	0.536	3.06684e-05	Somite.1	hipk3a
nradd1	1.72626e-09	0.407179	0.69	0.342	3.08794e-05	Somite.1	nradd
mef2d	1.73035e-09	0.260623	0.381	0.133	3.09525e-05	Somite.1	mef2d
vash2	2.1529e-09	0.689501	0.548	0.291	3.8511e-05	Somite.1	vash2
slc25a25b1	7.21174e-09	0.439713	0.417	0.172	0.000129004	Somite.1	slc25a25b
pip4p2	7.42222e-09	0.361002	0.31	0.104	0.000132769	Somite.1	pip4p2
zgc:91944	8.05816e-09	0.263526	0.19	0.046	0.000144144	Somite.1	zgc:91944
wapla	9.2424e-09	0.542642	0.476	0.229	0.000165328	Somite.1	wapla
tcf7l1a	1.00119e-08	0.503621	0.69	0.404	0.000179093	Somite.1	tcf7l1a
gid8b	1.14274e-08	0.492783	0.286	0.097	0.000204413	Somite.1	gid8b
tle3b	1.35154e-08	0.543182	0.726	0.445	0.000241763	Somite.1	tle3b
spred2b	1.35272e-08	0.483214	0.798	0.532	0.000241975	Somite.1	spred2b
itga91	1.87696e-08	0.426697	0.452	0.194	0.00033575	Somite.1	itga9
ldb2b	2.7036e-08	0.270866	0.262	0.083	0.000483619	Somite.1	ldb2b
aldh1a21	2.91851e-08	0.371971	0.202	0.054	0.000522063	Somite.1	aldh1a2
p3h4	3.67057e-08	0.562064	0.69	0.431	0.000656592	Somite.1	p3h4
nrip1a	4.60645e-08	0.260922	0.25	0.076	0.000824002	Somite.1	nrip1a
LIN28A	4.71356e-08	0.433349	0.488	0.238	0.000843162	Somite.1	LIN28A
id11	4.77478e-08	0.516954	0.94	0.701	0.000854112	Somite.1	id1
serpinh1b1	5.08709e-08	0.407539	0.75	0.425	0.000909978	Somite.1	serpinh1b
lmbr1l	5.82139e-08	0.59879	0.631	0.39	0.00104133	Somite.1	lmbr1l
hoxc10a	6.27753e-08	0.35326	0.286	0.099	0.00112293	Somite.1	hoxc10a
si:dkey-57k2.7	1.12979e-07	0.253753	0.226	0.069	0.00202097	Somite.1	si:dkey-57k2.7
zgc:171506	1.18267e-07	0.276574	0.167	0.041	0.00211555	Somite.1	zgc:171506
prdm11	1.22827e-07	0.363044	0.31	0.118	0.00219714	Somite.1	prdm11
stox11	1.26099e-07	0.284604	0.333	0.126	0.00225566	Somite.1	stox1
myclb	1.49326e-07	0.348982	0.321	0.123	0.00267114	Somite.1	myclb
abi1a	1.85377e-07	0.403468	0.524	0.264	0.00331603	Somite.1	abi1a
sema4bb	1.97589e-07	0.464069	0.619	0.376	0.00353447	Somite.1	sema4bb
cdh22	2.50752e-07	0.485934	0.905	0.68	0.00448545	Somite.1	cdh2
arid3b	2.50967e-07	0.427454	0.929	0.814	0.0044893	Somite.1	arid3b
trim35-7.11	3.06279e-07	0.309144	0.262	0.09	0.00547871	Somite.1	trim35-7.1
st3gal8	3.11586e-07	0.323509	0.357	0.148	0.00557366	Somite.1	st3gal8
egln1b1	4.12146e-07	0.61463	0.464	0.248	0.00737246	Somite.1	egln1b
enah	4.4817e-07	0.549086	0.667	0.423	0.00801686	Somite.1	enah
prickle3	4.56473e-07	0.466606	0.452	0.232	0.00816538	Somite.1	prickle3
rreb1a1	4.69592e-07	0.51959	0.667	0.445	0.00840006	Somite.1	rreb1a
asph1	5.46253e-07	0.329999	0.464	0.224	0.00977137	Somite.1	asph
hoxb3a1	6.32138e-07	0.334258	0.536	0.263	0.0113077	Somite.1	hoxb3a
xrn2	7.47347e-07	0.37834	0.786	0.578	0.0133686	Somite.1	xrn2
pik3c2b1	8.25662e-07	0.532942	0.667	0.427	0.0147694	Somite.1	pik3c2b
hsp90aa1.1	8.58214e-07	0.25321	0.155	0.039	0.0153517	Somite.1	hsp90aa1.1
elmo1	1.59271e-06	0.39394	0.476	0.259	0.0284904	Somite.1	elmo1
npm1a1	1.79138e-06	0.38558	0.786	0.578	0.0320442	Somite.1	npm1a
lmo4a	1.9719e-06	0.292991	0.44	0.209	0.0352733	Somite.1	lmo4a
sesn3	2.3177e-06	0.279373	0.31	0.127	0.041459	Somite.1	sesn3
gnao1a	2.47178e-06	0.321498	0.357	0.159	0.0442152	Somite.1	gnao1a
si:dkey-57k2.7.1	3.81172e-06	0.260922	0.262	0.104	0.0681841	Somite.1	si:dkey-57k2.7.1
tiam1a	4.09832e-06	0.3283	0.631	0.375	0.0733107	Somite.1	tiam1a
dlg1l	5.20697e-06	0.5125	0.524	0.313	0.0931423	Somite.1	dlg1l
RIMBP22	6.30306e-06	0.437262	0.369	0.173	0.112749	Somite.1	RIMBP2
asap1a1	6.66869e-06	0.454158	0.702	0.49	0.11929	Somite.1	asap1a
pald1a	7.00202e-06	0.298992	0.333	0.15	0.125252	Somite.1	pald1a
peli2	7.22176e-06	0.441188	0.69	0.489	0.129183	Somite.1	peli2
macf1a1	8.61353e-06	0.561556	0.702	0.515	0.154079	Somite.1	macf1a
smfn	8.70058e-06	0.258958	0.262	0.105	0.155636	Somite.1	smfn
tcf3b	1.24513e-05	0.421316	0.631	0.425	0.222729	Somite.1	tcf3b
wnt8a	1.25881e-05	0.30817	0.202	0.072	0.225176	Somite.1	wnt8a
spry4	1.37915e-05	0.275288	0.452	0.235	0.246702	Somite.1	spry4
atg16l1	1.54846e-05	0.276181	0.405	0.208	0.276989	Somite.1	atg16l1
nt5dc2	1.65241e-05	0.371306	0.381	0.187	0.295582	Somite.1	nt5dc2
stard8	1.66641e-05	0.362383	0.548	0.346	0.298087	Somite.1	stard8
tns3.2	1.87562e-05	0.337011	0.321	0.152	0.33551	Somite.1	tns3.2
zc3h7a	2.16639e-05	0.294758	0.417	0.222	0.387524	Somite.1	zc3h7a
arhgap5	2.17881e-05	0.31321	0.702	0.47	0.389745	Somite.1	arhgap5
prickle1b1	2.46417e-05	0.265662	0.536	0.305	0.440791	Somite.1	prickle1b
fstl1b1	2.95813e-05	0.556654	0.595	0.448	0.52915	Somite.1	fstl1b
dnttip2	3.1597e-05	0.388627	0.56	0.341	0.565207	Somite.1	dnttip2
exosc4	3.26183e-05	0.270035	0.274	0.12	0.583476	Somite.1	exosc4
cux1a	3.65765e-05	0.365846	0.738	0.582	0.65428	Somite.1	cux1a
rbm28	3.73169e-05	0.372732	0.679	0.51	0.667524	Somite.1	rbm28
taf4a	4.10134e-05	0.358754	0.405	0.225	0.733648	Somite.1	taf4a
rbmx	5.1925e-05	0.373492	0.893	0.834	0.928835	Somite.1	rbmx
ebna1bp2	5.95624e-05	0.366816	0.583	0.402	1	Somite.1	ebna1bp2
usp31	6.16476e-05	0.471401	0.429	0.254	1	Somite.1	usp31
prmt7	6.68659e-05	0.271537	0.357	0.184	1	Somite.1	prmt7
pcca1	6.77802e-05	0.277812	0.464	0.264	1	Somite.1	pcca
agrn1	6.87162e-05	0.305641	0.893	0.758	1	Somite.1	agrn
armc9	7.32376e-05	0.323913	0.357	0.194	1	Somite.1	armc9
arrb2a	7.35769e-05	0.360968	0.417	0.246	1	Somite.1	arrb2a
gnaia	9.42069e-05	0.402583	0.512	0.331	1	Somite.1	gnaia
kcnma1a	9.68991e-05	0.328901	0.333	0.166	1	Somite.1	kcnma1a
slc20a2	9.8143e-05	0.379561	0.655	0.468	1	Somite.1	slc20a2
eif4ebp3l1	0.000104526	0.267259	0.405	0.224	1	Somite.1	eif4ebp3l
erf1	0.000107551	0.256115	0.679	0.468	1	Somite.1	erf
metrnla	0.000109494	0.416156	0.369	0.207	1	Somite.1	metrnla
pdcd11	0.000125421	0.353593	0.607	0.445	1	Somite.1	pdcd11
mybbp1a1	0.00013039	0.430998	0.679	0.514	1	Somite.1	mybbp1a
gsk3ab	0.000131367	0.270541	0.714	0.484	1	Somite.1	gsk3ab
si:ch73-281n10.2	0.00013928	0.371789	0.798	0.654	1	Somite.1	si:ch73-281n10.2
larp4ab	0.000159777	0.291115	0.512	0.327	1	Somite.1	larp4ab
sall4	0.000163473	0.287699	0.583	0.369	1	Somite.1	sall4
lrp5	0.000168159	0.372307	0.679	0.541	1	Somite.1	lrp5
heatr1	0.000172423	0.306179	0.714	0.548	1	Somite.1	heatr1
eif2s3	0.000176866	0.344628	0.512	0.327	1	Somite.1	eif2s3
fbxo18	0.000177829	0.381137	0.298	0.155	1	Somite.1	fbxo18
coq8aa	0.000183582	0.384426	0.464	0.302	1	Somite.1	coq8aa
qkia	0.000185381	0.321396	0.833	0.667	1	Somite.1	qkia
fgfrl1a1	0.000190325	0.281865	0.369	0.194	1	Somite.1	fgfrl1a
mych	0.000193527	0.33346	0.381	0.226	1	Somite.1	mych
ngfb	0.000199949	0.252688	0.179	0.069	1	Somite.1	ngfb
dusp19b	0.000207835	0.481663	0.702	0.524	1	Somite.1	dusp19b
rbfox2	0.000215606	0.290794	0.44	0.268	1	Somite.1	rbfox2
cep85l	0.000221238	0.28613	0.679	0.479	1	Somite.1	cep85l
igsf31	0.000223481	0.344594	0.726	0.576	1	Somite.1	igsf3
tcf3a	0.000227599	0.367659	0.726	0.548	1	Somite.1	tcf3a
znf106a	0.000236627	0.305128	0.5	0.324	1	Somite.1	znf106a
nos1apa.12	0.000237575	0.30607	0.631	0.426	1	Somite.1	nos1apa.1
poc1b	0.000245661	0.266346	0.333	0.176	1	Somite.1	poc1b
zgc:154058	0.000257811	0.250391	0.595	0.377	1	Somite.1	zgc:154058
phgdh	0.00025844	0.313436	0.274	0.136	1	Somite.1	phgdh
net1	0.000260487	0.29173	0.393	0.225	1	Somite.1	net1
enpp1	0.00034223	0.26531	0.238	0.112	1	Somite.1	enpp1
tcirg1b	0.000345561	0.262426	0.286	0.145	1	Somite.1	tcirg1b
setx1	0.000350542	0.43455	0.452	0.306	1	Somite.1	setx
efnb2b1	0.000366676	0.282628	0.643	0.447	1	Somite.1	efnb2b
ncoa3	0.00038094	0.292991	0.667	0.473	1	Somite.1	ncoa3
si:ch211-156j22.4	0.000383479	0.300021	0.393	0.232	1	Somite.1	si:ch211-156j22.4
gdi2	0.000401378	0.290229	0.298	0.161	1	Somite.1	gdi2
bard11	0.00040713	0.295616	0.429	0.266	1	Somite.1	bard1
gnai2a1	0.000416041	0.252746	0.655	0.473	1	Somite.1	gnai2a
plrg1	0.000440698	0.261384	0.286	0.146	1	Somite.1	plrg1
arhgap101	0.000448246	0.348301	0.488	0.318	1	Somite.1	arhgap10
agap31	0.000577499	0.473286	0.5	0.374	1	Somite.1	agap3
nfasca	0.000660864	0.411202	0.262	0.134	1	Somite.1	nfasca
amd1	0.000704203	0.265093	0.464	0.296	1	Somite.1	amd1
atxn2l	0.000728167	0.359967	0.476	0.338	1	Somite.1	atxn2l
polrmt	0.000732519	0.278553	0.405	0.261	1	Somite.1	polrmt
caska1	0.000745197	0.443241	0.571	0.442	1	Somite.1	caska
tfap4	0.000891074	0.355351	0.738	0.618	1	Somite.1	tfap4
akap1b	0.000895	0.258179	0.369	0.222	1	Somite.1	akap1b
ncl1	0.000914655	0.348397	0.81	0.73	1	Somite.1	ncl
mki67	0.000947439	0.349617	0.69	0.558	1	Somite.1	mki67
nkd13	0.00100051	0.274838	0.5	0.331	1	Somite.1	nkd1
si:ch211-196c10.15	0.00105709	0.294943	0.69	0.547	1	Somite.1	si:ch211-196c10.15
tars1	0.00116112	0.295049	0.393	0.25	1	Somite.1	tars1
pprc1	0.00119195	0.350654	0.571	0.433	1	Somite.1	pprc1
msi2a	0.00124543	0.273096	0.369	0.227	1	Somite.1	msi2a
arhgef12a	0.00144905	0.305368	0.655	0.509	1	Somite.1	arhgef12a
tax1bp1b	0.00146584	0.252958	0.5	0.337	1	Somite.1	tax1bp1b
rpl34	0.00159306	0.262881	0.857	0.813	1	Somite.1	rpl34
cacna2d2a	0.00162473	0.257146	0.357	0.216	1	Somite.1	cacna2d2a
utp3	0.00187628	0.262979	0.321	0.195	1	Somite.1	utp3
pdzd2	0.00196688	0.30751	0.452	0.311	1	Somite.1	pdzd2
slc7a3b	0.00197567	0.251176	0.488	0.335	1	Somite.1	slc7a3b
pif1	0.00246583	0.317341	0.286	0.161	1	Somite.1	pif1
rps25	0.00272676	0.313302	0.75	0.598	1	Somite.1	rps25
dkc11	0.00287873	0.300132	0.786	0.685	1	Somite.1	dkc1
kmt2a	0.00289776	0.33869	0.56	0.421	1	Somite.1	kmt2a
arhgap21b	0.00300638	0.268906	0.952	0.89	1	Somite.1	arhgap21b
mntb	0.00316416	0.385267	0.417	0.292	1	Somite.1	mntb
dhx37	0.00333824	0.322219	0.5	0.364	1	Somite.1	dhx37
rpl5a	0.0035753	0.25192	0.714	0.592	1	Somite.1	rpl5a
grk3	0.00376279	0.268199	0.476	0.349	1	Somite.1	grk3
zgc:158463	0.00407971	0.280167	1	0.996	1	Somite.1	zgc:158463
C7H20orf271	0.00435939	0.263264	0.619	0.46	1	Somite.1	C7H20orf27
maml3	0.00500042	0.358744	0.738	0.664	1	Somite.1	maml3
mapk1	0.0052403	0.311464	0.417	0.291	1	Somite.1	mapk1
ncapd2	0.00614242	0.25597	0.381	0.263	1	Somite.1	ncapd2
banp	0.00634088	0.279504	0.405	0.281	1	Somite.1	banp
prkcbb1	0.00755765	0.256525	0.405	0.271	1	Somite.1	prkcbb
pum3	0.00843701	0.255985	0.619	0.485	1	Somite.1	pum3
gusb	0.00862272	0.293677	0.31	0.202	1	Somite.1	gusb
msi2b	0.00878028	0.346437	0.548	0.439	1	Somite.1	msi2b
gar1	0.00914104	0.332738	0.44	0.34	1	Somite.1	gar1
kank1a	0.0091921	0.304176	0.393	0.267	1	Somite.1	kank1a
trit1	0.00972827	0.287468	0.595	0.489	1	Somite.1	trit1
pax6a2	1.71087e-54	1.29468	0.707	0.111	3.06041e-50	MB	pax6a
zfhx41	1.86395e-44	1.57603	0.927	0.335	3.33423e-40	MB	zfhx4
zbtb16b3	5.3591e-40	1.58427	0.963	0.394	9.58635e-36	MB	zbtb16b
nr2e1	1.31762e-39	0.353036	0.207	0.008	2.35695e-35	MB	nr2e1
ek11	4.40104e-39	1.39834	0.805	0.207	7.87257e-35	MB	ek1
igdcc31	2.53966e-38	0.851652	0.451	0.061	4.54294e-34	MB	igdcc3
fgfr31	1.84444e-35	1.29384	0.817	0.254	3.29933e-31	MB	fgfr3
ncam1a3	7.63115e-34	1.50635	0.878	0.323	1.36506e-29	MB	ncam1a
ptprn22	7.1083e-31	1.02622	0.866	0.284	1.27153e-26	MB	ptprn2
ndst2b1	8.95758e-31	1.22621	0.659	0.181	1.60233e-26	MB	ndst2b
ptprnb1	3.46372e-29	0.800587	0.415	0.066	6.19591e-25	MB	ptprnb
zbtb16a3	4.42805e-27	1.29812	0.988	0.677	7.92089e-23	MB	zbtb16a
sema3gb1	4.92786e-27	0.586984	0.427	0.074	8.81495e-23	MB	sema3gb
zgc:101100	5.11094e-26	0.36019	0.22	0.019	9.14246e-22	MB	zgc:101100
plxdc23	2.33752e-25	0.958203	0.841	0.303	4.18136e-21	MB	plxdc2
tenm42	2.36747e-24	1.2099	0.939	0.487	4.23493e-20	MB	tenm4
wnt8b1	2.12047e-23	0.591509	0.341	0.055	3.7931e-19	MB	wnt8b
lhx5	2.26539e-23	0.509926	0.22	0.022	4.05233e-19	MB	lhx5
nr2f21	3.55435e-23	0.535273	0.329	0.053	6.35802e-19	MB	nr2f2
arhgap21a2	5.42188e-23	0.768643	0.695	0.235	9.69865e-19	MB	arhgap21a
pdgfaa	8.39068e-23	0.435667	0.244	0.029	1.50092e-18	MB	pdgfaa
cachd11	1.42386e-21	0.96224	0.988	0.712	2.54701e-17	MB	cachd1
dvl3b1	2.68021e-21	0.623043	0.439	0.102	4.79436e-17	MB	dvl3b
epha4a	5.74744e-21	0.879021	0.854	0.388	1.0281e-16	MB	epha4a
gli33	9.53967e-21	1.23163	0.939	0.63	1.70646e-16	MB	gli3
zfpm2b	1.10331e-20	0.524727	0.293	0.046	1.9736e-16	MB	zfpm2b
otx2a	1.37094e-20	0.601119	0.476	0.117	2.45233e-16	MB	otx2a
pappab3	2.48897e-20	0.837983	0.768	0.275	4.45227e-16	MB	pappab
foxp43	3.72981e-20	1.05	0.902	0.559	6.67188e-16	MB	foxp4
si:ch211-269k10.21	4.10652e-20	0.660575	0.634	0.21	7.34574e-16	MB	si:ch211-269k10.2
otx2b1	1.39445e-19	0.477982	0.329	0.062	2.49439e-15	MB	otx2b
nova23	2.33317e-19	0.850901	0.939	0.44	4.17357e-15	MB	nova2
rfx42	4.09702e-19	0.737045	0.78	0.292	7.32875e-15	MB	rfx4
msi12	6.87422e-19	0.819528	0.732	0.293	1.22966e-14	MB	msi1
jag2b1	1.15533e-18	0.964754	0.841	0.417	2.06665e-14	MB	jag2b
cntfr3	5.50397e-18	0.79946	0.866	0.415	9.84551e-14	MB	cntfr
si:ch211-168f7.51	8.193e-18	0.731214	0.622	0.237	1.46556e-13	MB	si:ch211-168f7.5
hs6st1a1	3.00663e-17	0.957455	0.549	0.187	5.37826e-13	MB	hs6st1a
st8sia21	1.08484e-16	0.575426	0.402	0.105	1.94056e-12	MB	st8sia2
otx1	3.76782e-16	0.476833	0.354	0.083	6.73988e-12	MB	otx1
tet31	7.00808e-16	0.565817	0.488	0.146	1.25361e-11	MB	tet3
fgfr23	2.0981e-15	0.70596	0.878	0.503	3.75309e-11	MB	fgfr2
epha7	3.55514e-15	0.69157	0.78	0.358	6.35943e-11	MB	epha7
CABZ01053976.1	4.56449e-15	0.396595	0.354	0.088	8.16496e-11	MB	CABZ01053976.1
grin2db	6.93062e-15	0.349617	0.207	0.032	1.23975e-10	MB	grin2db
tiam1a1	7.09802e-15	0.858812	0.72	0.37	1.26969e-10	MB	tiam1a
mdka1	7.70994e-15	0.532913	0.317	0.074	1.37915e-10	MB	mdka
chl1a	1.16261e-14	0.472206	0.341	0.081	2.07967e-10	MB	chl1a
BX284638.23	3.77912e-14	0.706245	0.683	0.306	6.76008e-10	MB	BX284638.2
plxna1a1	4.2326e-14	0.601324	0.451	0.148	7.57128e-10	MB	plxna1a
pcdh172	4.62751e-14	1.04702	0.39	0.118	8.2777e-10	MB	pcdh17
adgrv12	1.45372e-13	0.690274	0.78	0.376	2.60042e-09	MB	adgrv1
fgfr42	1.53246e-13	0.678569	0.72	0.366	2.74127e-09	MB	fgfr4
rbfox3a1	2.88065e-13	0.699378	0.39	0.119	5.15291e-09	MB	rbfox3a
plch13	4.11067e-13	0.701246	0.805	0.424	7.35317e-09	MB	plch1
ildr2	5.87575e-13	0.505243	0.512	0.185	1.05105e-08	MB	ildr2
zeb1b3	6.51752e-13	0.761373	0.963	0.602	1.16585e-08	MB	zeb1b
col4a62	1.01261e-12	0.898635	0.829	0.523	1.81136e-08	MB	col4a6
caskin1	5.45785e-12	0.255669	0.366	0.107	9.76301e-08	MB	caskin1
amot1	8.51721e-12	0.529561	0.451	0.16	1.52356e-07	MB	amot
emx3	1.15716e-11	0.310089	0.171	0.029	2.06993e-07	MB	emx3
gli2a1	1.58859e-11	0.691326	0.963	0.756	2.84167e-07	MB	gli2a
wnt12	1.84129e-11	0.416953	0.183	0.033	3.2937e-07	MB	wnt1
celsr1b3	3.3523e-11	0.665928	0.707	0.375	5.99659e-07	MB	celsr1b
ZNF4232	5.78077e-11	0.57771	0.768	0.403	1.03406e-06	MB	ZNF423
lrp2a3	9.25389e-11	0.547304	0.683	0.328	1.65534e-06	MB	lrp2a
ephb4a1	1.40988e-10	0.76345	0.829	0.541	2.522e-06	MB	ephb4a
tox3	2.69119e-10	0.582126	0.902	0.598	4.814e-06	MB	tox
skib1	3.00217e-10	0.422228	0.463	0.181	5.37028e-06	MB	skib
s1pr23	3.39226e-10	0.633877	0.72	0.415	6.06808e-06	MB	s1pr2
fezf2	3.90937e-10	0.266636	0.22	0.05	6.99308e-06	MB	fezf2
pdgfaa.1	7.89469e-10	0.40198	0.183	0.039	1.4122e-05	MB	pdgfaa.1
dennd5a1	1.01299e-09	0.505359	0.646	0.343	1.81203e-05	MB	dennd5a
nav2a1	1.16254e-09	0.375403	0.512	0.216	2.07956e-05	MB	nav2a
pou2f2a.12	1.67374e-09	0.383245	0.341	0.116	2.99398e-05	MB	pou2f2a.1
fat3a3	1.9709e-09	0.448748	0.61	0.306	3.52555e-05	MB	fat3a
pag1	3.36732e-09	0.580032	0.439	0.183	6.02346e-05	MB	pag1
efnb2b2	6.42775e-09	0.560394	0.744	0.442	0.00011498	MB	efnb2b
pbx3b	7.06084e-09	0.370873	0.293	0.095	0.000126304	MB	pbx3b
si:ch211-214c7.41	7.08035e-09	0.352367	0.341	0.121	0.000126653	MB	si:ch211-214c7.4
zeb2b1	8.79093e-09	0.338607	0.415	0.163	0.000157252	MB	zeb2b
lmo31	1.01547e-08	0.404767	0.5	0.218	0.000181647	MB	lmo3
celsr1a1	1.38801e-08	0.466618	0.805	0.487	0.000248287	MB	celsr1a
sox11a	1.58482e-08	0.463326	0.549	0.267	0.000283492	MB	sox11a
dclk2a1	1.78397e-08	0.39954	0.39	0.155	0.000319117	MB	dclk2a
wnt41	1.87712e-08	0.431859	0.232	0.067	0.00033578	MB	wnt4
vasna1	1.99285e-08	0.369513	0.256	0.079	0.00035648	MB	vasna
tenm3	2.81218e-08	0.612665	0.732	0.515	0.000503043	MB	tenm3
pde1a1	4.00506e-08	0.427943	0.305	0.108	0.000716425	MB	pde1a
tnfrsf191	5.07311e-08	0.689646	0.585	0.33	0.000907478	MB	tnfrsf19
brsk2b	5.79445e-08	0.363841	0.256	0.085	0.00103651	MB	brsk2b
tiam2a1	6.1776e-08	0.525719	0.768	0.483	0.00110505	MB	tiam2a
sox52	6.31417e-08	0.81283	0.549	0.309	0.00112948	MB	sox5
celf3a	6.65018e-08	0.493774	0.463	0.226	0.00118958	MB	celf3a
epha2b1	7.2917e-08	0.550901	0.756	0.487	0.00130434	MB	epha2b
nxn4	8.50916e-08	0.508453	0.793	0.518	0.00152212	MB	nxn
afdna2	8.53818e-08	0.538091	0.915	0.759	0.00152731	MB	afdna
jam3b1	8.99688e-08	0.470552	0.549	0.289	0.00160936	MB	jam3b
pax6b2	1.02359e-07	0.510864	0.451	0.201	0.00183099	MB	pax6b
zic2b	1.02605e-07	0.464513	0.451	0.213	0.0018354	MB	zic2b
ccdc85ca1	1.14725e-07	0.282956	0.28	0.095	0.0020522	MB	ccdc85ca
map7d1a3	1.41126e-07	0.443112	0.683	0.409	0.00252446	MB	map7d1a
myh141	1.73815e-07	0.325448	0.378	0.155	0.00310921	MB	myh14
si:ch211-212k18.52	2.03074e-07	0.370672	0.427	0.195	0.00363258	MB	si:ch211-212k18.5
aff2	2.28742e-07	0.510622	0.573	0.321	0.00409174	MB	aff2
igdcc42	2.62084e-07	0.414419	0.671	0.397	0.00468816	MB	igdcc4
spsb4a	2.75123e-07	0.484292	0.902	0.72	0.00492141	MB	spsb4a
elp41	2.95485e-07	0.323552	0.317	0.123	0.00528563	MB	elp4
hs3st3b1b3	3.51481e-07	0.51612	0.5	0.249	0.00628729	MB	hs3st3b1b
nr2f52	3.56283e-07	0.534545	0.561	0.309	0.00637319	MB	nr2f5
p3h21	5.32288e-07	0.459136	0.329	0.13	0.00952157	MB	p3h2
cxadr2	5.46898e-07	0.473137	0.61	0.359	0.00978292	MB	cxadr
syne1a1	6.31555e-07	0.409745	0.244	0.086	0.0112973	MB	syne1a
cnksr31	1.00488e-06	0.436509	0.549	0.299	0.0179752	MB	cnksr3
skia1	1.30397e-06	0.343622	0.671	0.394	0.0233255	MB	skia
mbd3b2	1.51442e-06	0.438162	0.585	0.347	0.0270899	MB	mbd3b
si:ch73-364h19.11	1.75188e-06	0.370337	0.22	0.074	0.0313376	MB	si:ch73-364h19.1
si:ch211-222l21.11	2.05601e-06	0.428791	0.988	0.854	0.0367779	MB	si:ch211-222l21.1
dhx32b	2.13142e-06	0.27365	0.183	0.055	0.0381268	MB	dhx32b
acsl21	2.88067e-06	0.319386	0.488	0.253	0.0515295	MB	acsl2
tjp1a	2.9404e-06	0.440383	0.366	0.175	0.0525978	MB	tjp1a
ptprub	3.01205e-06	0.419758	0.415	0.214	0.0538795	MB	ptprub
tmem1081	4.1192e-06	0.33605	0.683	0.404	0.0736843	MB	tmem108
si:ch211-169p10.1	4.31781e-06	0.261625	0.28	0.112	0.0772369	MB	si:ch211-169p10.1
zgc:114120	4.56737e-06	0.280721	0.159	0.046	0.0817012	MB	zgc:114120
efnb11	5.52679e-06	0.306637	0.622	0.358	0.0988633	MB	efnb1
sdc2	5.88485e-06	0.317184	0.573	0.336	0.105268	MB	sdc2
exoc6	6.12036e-06	0.355881	0.512	0.288	0.109481	MB	exoc6
si:ch73-386h18.11	6.78821e-06	0.403525	0.463	0.259	0.121428	MB	si:ch73-386h18.1
tra2b	7.10444e-06	0.315469	0.573	0.336	0.127084	MB	tra2b
col15a1b	7.19081e-06	0.377717	0.317	0.137	0.128629	MB	col15a1b
blmh2	7.68624e-06	0.39274	0.683	0.45	0.137491	MB	blmh
mdkb2	7.7775e-06	0.277322	0.439	0.219	0.139124	MB	mdkb
epb41a3	7.84405e-06	0.430066	0.561	0.349	0.140314	MB	epb41a
zeb1a1	8.70569e-06	0.283381	0.427	0.211	0.155727	MB	zeb1a
FRMD5	9.47522e-06	0.309504	0.354	0.162	0.169493	MB	FRMD5
frmd4ba2	9.72067e-06	0.472724	0.683	0.469	0.173883	MB	frmd4ba
ptpn131	1.07513e-05	0.405428	0.78	0.562	0.192318	MB	ptpn13
six71	1.13654e-05	0.477091	0.341	0.159	0.203305	MB	six7
fnbp1a2	1.24953e-05	0.308627	0.28	0.121	0.223515	MB	fnbp1a
zgc:171772	1.46636e-05	0.361069	0.793	0.628	0.262302	MB	zgc:171772
atp8a11	1.523e-05	0.300988	0.524	0.298	0.272434	MB	atp8a1
pbx41	1.6861e-05	0.378642	0.915	0.663	0.301609	MB	pbx4
lrp81	2.11402e-05	0.356896	0.488	0.291	0.378157	MB	lrp8
plekha5	2.17194e-05	0.302889	0.341	0.165	0.388516	MB	plekha5
SEMA4F2	2.87458e-05	0.340175	0.439	0.24	0.514205	MB	SEMA4F
adcy6b1	3.36883e-05	0.303206	0.537	0.316	0.602616	MB	adcy6b
ston21	3.47737e-05	0.364139	0.39	0.206	0.622031	MB	ston2
[truncated: 6,333 more rows]

## Sheet: 3.HB13hpf_WT_all_clusters
	p_val	avg_log2FC	pct.1	pct.2	p_val_adj	cluster	gene
cyp26c1	1.76208e-53	2.20181	0.541	0.092	3.58266e-49	r1 r2 & r4	cyp26c1
plp1a	2.50432e-51	1.8745	0.827	0.248	5.09179e-47	r1 r2 & r4	plp1a
skap2	6.2138e-43	2.2599	0.444	0.074	1.26339e-38	r1 r2 & r4	skap2
lamb2	2.16234e-40	1.76857	0.707	0.204	4.39647e-36	r1 r2 & r4	lamb2
si:dkey-27i16.2	2.06969e-35	1.95862	0.263	0.029	4.2081e-31	r1 r2 & r4	si:dkey-27i16.2
nr2f2	3.29851e-35	1.87782	0.737	0.271	6.70654e-31	r1 r2 & r4	nr2f2
ndst3	1.28444e-34	1.92527	0.579	0.163	2.61153e-30	r1 r2 & r4	ndst3
cyp26b1	1.83754e-34	2.38172	0.256	0.028	3.73609e-30	r1 r2 & r4	cyp26b1
plxdc2	3.95802e-34	1.47784	0.842	0.362	8.04744e-30	r1 r2 & r4	plxdc2
vgll3	2.41353e-33	2.00128	0.173	0.011	4.90719e-29	r1 r2 & r4	vgll3
lamb2l	1.36988e-32	1.75962	0.654	0.219	2.78524e-28	r1 r2 & r4	lamb2l
cntfr	1.67253e-30	1.43673	0.962	0.667	3.40059e-26	r1 r2 & r4	cntfr
mpz	4.0982e-30	1.97019	0.331	0.058	8.33246e-26	r1 r2 & r4	mpz
st8sia2	5.19706e-29	1.83339	0.346	0.067	1.05667e-24	r1 r2 & r4	st8sia2
hoxa2b	6.66508e-29	1.70221	0.293	0.047	1.35514e-24	r1 r2 & r4	hoxa2b
epha4b	1.04167e-28	1.64492	0.752	0.317	2.11792e-24	r1 r2 & r4	epha4b
ptprna	4.04419e-28	1.41197	0.722	0.296	8.22265e-24	r1 r2 & r4	ptprna
adgrv1	2.11985e-27	1.16671	0.947	0.53	4.31008e-23	r1 r2 & r4	adgrv1
rgs3b	1.64877e-26	1.69254	0.444	0.117	3.35227e-22	r1 r2 & r4	rgs3b
rasal2	4.83407e-25	1.20789	0.895	0.612	9.82863e-21	r1 r2 & r4	rasal2
irx1a	1.20607e-24	1.56581	0.278	0.05	2.45219e-20	r1 r2 & r4	irx1a
adgrl2a	2.7622e-24	1.03474	0.947	0.729	5.6161e-20	r1 r2 & r4	adgrl2a
lrp2a	3.0985e-24	1.25173	0.82	0.429	6.29986e-20	r1 r2 & r4	lrp2a
sorbs2b	7.32302e-24	1.52298	0.624	0.242	1.48892e-19	r1 r2 & r4	sorbs2b
nrarpb	3.39136e-23	1.36492	0.647	0.266	6.89532e-19	r1 r2 & r4	nrarpb
mbd3b	8.92797e-23	1.19408	0.805	0.416	1.81523e-18	r1 r2 & r4	mbd3b
mapk11	1.20014e-22	1.53697	0.421	0.12	2.44012e-18	r1 r2 & r4	mapk11
plch1	1.29871e-22	1.07702	0.872	0.453	2.64053e-18	r1 r2 & r4	plch1
irx3a	2.24542e-22	1.52422	0.323	0.073	4.56539e-18	r1 r2 & r4	irx3a
efnb3b	2.40091e-22	1.17904	0.872	0.509	4.88154e-18	r1 r2 & r4	efnb3b
acsl2	4.83123e-22	1.46409	0.639	0.264	9.82285e-18	r1 r2 & r4	acsl2
sox13	3.41516e-21	1.43059	0.677	0.316	6.94371e-17	r1 r2 & r4	sox13
ncam1a	5.71621e-21	0.964238	0.91	0.501	1.16222e-16	r1 r2 & r4	ncam1a
chl1b	6.36773e-21	1.49674	0.421	0.126	1.29469e-16	r1 r2 & r4	chl1b
nat8l	9.96001e-21	1.28379	0.722	0.337	2.02507e-16	r1 r2 & r4	nat8l
cyp2p7	1.75023e-20	1.50358	0.271	0.056	3.55858e-16	r1 r2 & r4	cyp2p7
rfx4	2.03857e-20	0.925973	0.895	0.432	4.14482e-16	r1 r2 & r4	rfx4
BX324164.5	3.09409e-20	1.28374	0.414	0.123	6.29091e-16	r1 r2 & r4	BX324164.5
nova2	3.5627e-20	0.853698	0.992	0.72	7.24368e-16	r1 r2 & r4	nova2
lrig1	4.46612e-20	1.22211	0.857	0.566	9.08051e-16	r1 r2 & r4	lrig1
auts2b	3.10158e-19	1.4811	0.564	0.238	6.30614e-15	r1 r2 & r4	auts2b
dtnba	5.3893e-19	1.1072	0.744	0.372	1.09575e-14	r1 r2 & r4	dtnba
epha7	1.40193e-18	1.15804	0.782	0.432	2.8504e-14	r1 r2 & r4	epha7
msi1	2.48752e-18	0.889594	0.88	0.476	5.05762e-14	r1 r2 & r4	msi1
bmpr1ba	3.9751e-18	1.07678	0.677	0.319	8.08217e-14	r1 r2 & r4	bmpr1ba
pvrl2l	4.1692e-18	0.939631	0.887	0.527	8.47682e-14	r1 r2 & r4	pvrl2l
negr1	2.2197e-17	1.0186	0.789	0.411	4.51309e-13	r1 r2 & r4	negr1
pou3f3b	2.70004e-17	1.27058	0.459	0.164	5.48971e-13	r1 r2 & r4	pou3f3b
irx1b	4.22473e-17	1.43672	0.278	0.069	8.58972e-13	r1 r2 & r4	irx1b
celf2	7.21939e-17	1.27129	0.669	0.326	1.46785e-12	r1 r2 & r4	celf2
tet3	1.34237e-16	0.857957	0.91	0.567	2.7293e-12	r1 r2 & r4	tet3
celsr1b	1.54811e-16	0.98914	0.714	0.368	3.14761e-12	r1 r2 & r4	celsr1b
cgnl1	1.57617e-16	0.961211	0.85	0.519	3.20466e-12	r1 r2 & r4	cgnl1
ccdc85ca	2.06989e-16	1.04731	0.737	0.373	4.2085e-12	r1 r2 & r4	ccdc85ca
blmh	4.14309e-16	0.843532	0.872	0.586	8.42372e-12	r1 r2 & r4	blmh
cxcl12a	7.49841e-16	0.887409	0.571	0.24	1.52458e-11	r1 r2 & r4	cxcl12a
fam189a1	9.91582e-16	1.48937	0.323	0.098	2.01608e-11	r1 r2 & r4	fam189a1
ank2b	2.21568e-15	1.01526	0.737	0.407	4.50492e-11	r1 r2 & r4	ank2b
gpm6bb	2.26769e-15	1.22964	0.534	0.239	4.61067e-11	r1 r2 & r4	gpm6bb
ptprnb	2.31123e-15	1.03846	0.579	0.256	4.6992e-11	r1 r2 & r4	ptprnb
CR356242.1	2.48929e-15	1.47142	0.256	0.066	5.06123e-11	r1 r2 & r4	CR356242.1
cldn5a	2.79782e-15	0.898447	0.782	0.413	5.68853e-11	r1 r2 & r4	cldn5a
pou3f1	3.43183e-15	1.28219	0.331	0.103	6.9776e-11	r1 r2 & r4	pou3f1
sema5ba	6.26968e-15	1.0007	0.654	0.323	1.27475e-10	r1 r2 & r4	sema5ba
LO018430.2	8.72437e-15	1.24465	0.158	0.027	1.77384e-10	r1 r2 & r4	LO018430.2
brsk2b	1.00752e-14	1.1657	0.496	0.209	2.04849e-10	r1 r2 & r4	brsk2b
c4b	1.01467e-14	1.11508	0.436	0.163	2.06302e-10	r1 r2 & r4	c4b
pax6a	1.04388e-14	1.64806	0.368	0.129	2.12241e-10	r1 r2 & r4	pax6a
plekhh1	1.14312e-14	0.837077	0.85	0.571	2.32419e-10	r1 r2 & r4	plekhh1
FRMD5	1.47287e-14	1.0955	0.511	0.221	2.99464e-10	r1 r2 & r4	FRMD5
arhgef10lb	3.38692e-14	1.28423	0.526	0.245	6.88628e-10	r1 r2 & r4	arhgef10lb
ephb2b	5.08061e-14	1.16368	0.541	0.253	1.03299e-09	r1 r2 & r4	ephb2b
adamts3	7.98085e-14	1.2273	0.481	0.218	1.62267e-09	r1 r2 & r4	adamts3
fstl1b	1.49224e-13	0.92521	0.797	0.568	3.03402e-09	r1 r2 & r4	fstl1b
fzd3a	1.68923e-13	0.931007	0.677	0.382	3.43453e-09	r1 r2 & r4	fzd3a
gli2b	2.09123e-13	1.09796	0.571	0.282	4.25188e-09	r1 r2 & r4	gli2b
CT990561.1	3.22687e-13	1.67636	0.361	0.139	6.56088e-09	r1 r2 & r4	CT990561.1
ptprn2	3.49147e-13	0.950021	0.617	0.329	7.09886e-09	r1 r2 & r4	ptprn2
pcdh19	3.95617e-13	0.778709	0.872	0.535	8.04369e-09	r1 r2 & r4	pcdh19
tmsb4x	3.97496e-13	0.805044	0.827	0.595	8.08188e-09	r1 r2 & r4	tmsb4x
gli3	4.50567e-13	0.72185	0.932	0.765	9.16092e-09	r1 r2 & r4	gli3
azin1a	8.91769e-13	1.17896	0.564	0.299	1.81314e-08	r1 r2 & r4	azin1a
epb41a	9.0819e-13	0.761781	0.737	0.397	1.84653e-08	r1 r2 & r4	epb41a
robo1	1.15204e-12	0.730423	0.947	0.811	2.34232e-08	r1 r2 & r4	robo1
sox21b	1.21005e-12	1.10983	0.203	0.05	2.46028e-08	r1 r2 & r4	sox21b
cadm1a	3.26164e-12	0.708757	0.797	0.467	6.63157e-08	r1 r2 & r4	cadm1a
wnt8b	4.04891e-12	1.21978	0.361	0.133	8.23224e-08	r1 r2 & r4	wnt8b
qki2	4.4015e-12	0.859978	0.639	0.339	8.94914e-08	r1 r2 & r4	qki2
ccnd2a	4.73656e-12	0.825248	0.632	0.339	9.63038e-08	r1 r2 & r4	ccnd2a
CR848788.2	6.26668e-12	1.06132	0.376	0.149	1.27414e-07	r1 r2 & r4	CR848788.2
zbtb16b	8.79957e-12	0.595466	0.872	0.537	1.78913e-07	r1 r2 & r4	zbtb16b
ddr1	8.91588e-12	0.925894	0.699	0.416	1.81278e-07	r1 r2 & r4	ddr1
fat3a	8.96748e-12	0.796936	0.782	0.524	1.82327e-07	r1 r2 & r4	fat3a
srgap2	9.60978e-12	0.667106	0.947	0.773	1.95386e-07	r1 r2 & r4	srgap2
dag1	1.03207e-11	0.554816	0.977	0.792	2.09841e-07	r1 r2 & r4	dag1
jag2b	1.08781e-11	0.582157	0.992	0.789	2.21175e-07	r1 r2 & r4	jag2b
mapk12b	1.21545e-11	1.15085	0.383	0.16	2.47126e-07	r1 r2 & r4	mapk12b
si:dkey-151g10.3	1.61469e-11	0.938426	0.564	0.3	3.28299e-07	r1 r2 & r4	si:dkey-151g10.3
ptprfb	2.0366e-11	0.725824	0.932	0.837	4.14081e-07	r1 r2 & r4	ptprfb
dpysl2b	2.2457e-11	1.16321	0.308	0.112	4.56596e-07	r1 r2 & r4	dpysl2b
cdh2	2.34725e-11	0.518469	0.962	0.792	4.77244e-07	r1 r2 & r4	cdh2
acvr2bb	2.35132e-11	0.859868	0.647	0.365	4.78069e-07	r1 r2 & r4	acvr2bb
qkib	2.83062e-11	0.97442	0.556	0.284	5.75521e-07	r1 r2 & r4	qkib
SFMBT1	2.95365e-11	1.33938	0.308	0.117	6.00537e-07	r1 r2 & r4	SFMBT1
zbtb16a	3.23194e-11	0.507744	0.985	0.841	6.57118e-07	r1 r2 & r4	zbtb16a
ildr2	3.53123e-11	0.680577	0.752	0.449	7.1797e-07	r1 r2 & r4	ildr2
stat3	3.67484e-11	0.522493	0.985	0.926	7.47169e-07	r1 r2 & r4	stat3
rfx2	4.57438e-11	0.738516	0.82	0.593	9.30064e-07	r1 r2 & r4	rfx2
slc7a7	4.99891e-11	1.0068	0.534	0.283	1.01638e-06	r1 r2 & r4	slc7a7
si:ch211-137a8.4	5.77396e-11	0.897397	0.481	0.223	1.17396e-06	r1 r2 & r4	si:ch211-137a8.4
ank3b.1	8.02409e-11	1.0274	0.218	0.063	1.63146e-06	r1 r2 & r4	ank3b.1
sh3gl3a	8.03479e-11	1.02503	0.466	0.219	1.63363e-06	r1 r2 & r4	sh3gl3a
LHFPL6	8.29548e-11	1.33646	0.218	0.065	1.68664e-06	r1 r2 & r4	LHFPL6
gas7a	1.02543e-10	1.07667	0.323	0.123	2.0849e-06	r1 r2 & r4	gas7a
efna2a	1.22107e-10	0.98334	0.677	0.445	2.48267e-06	r1 r2 & r4	efna2a
coro1ca	1.9211e-10	0.793224	0.827	0.72	3.90597e-06	r1 r2 & r4	coro1ca
fbxl4	2.07032e-10	1.11431	0.301	0.112	4.20937e-06	r1 r2 & r4	fbxl4
arhgef10la	2.78617e-10	0.804798	0.564	0.3	5.66485e-06	r1 r2 & r4	arhgef10la
BX284638.2	3.17852e-10	0.692272	0.662	0.375	6.46258e-06	r1 r2 & r4	BX284638.2
plekha7b	4.94736e-10	0.821908	0.489	0.247	1.0059e-05	r1 r2 & r4	plekha7b
mdkb	6.07784e-10	0.881691	0.391	0.172	1.23575e-05	r1 r2 & r4	mdkb
rttn	8.33524e-10	0.936988	0.383	0.169	1.69472e-05	r1 r2 & r4	rttn
sh2d3ca	8.81278e-10	0.836709	0.398	0.178	1.79181e-05	r1 r2 & r4	sh2d3ca
cnksr3	9.38561e-10	0.854324	0.677	0.43	1.90828e-05	r1 r2 & r4	cnksr3
lfng	1.10486e-09	0.694059	0.737	0.488	2.2464e-05	r1 r2 & r4	lfng
mn1a	1.42053e-09	1.13829	0.383	0.179	2.88821e-05	r1 r2 & r4	mn1a
rnf44	1.43256e-09	0.714951	0.744	0.504	2.91268e-05	r1 r2 & r4	rnf44
pard6gb	1.4393e-09	0.688734	0.647	0.379	2.92639e-05	r1 r2 & r4	pard6gb
skia	1.78986e-09	0.693059	0.827	0.578	3.63915e-05	r1 r2 & r4	skia
si:dkeyp-86c4.1	1.8672e-09	1.08802	0.256	0.093	3.79639e-05	r1 r2 & r4	si:dkeyp-86c4.1
shroom4	2.15594e-09	0.813182	0.647	0.406	4.38346e-05	r1 r2 & r4	shroom4
si:ch211-106f21.1	2.30724e-09	1.08303	0.173	0.048	4.69108e-05	r1 r2 & r4	si:ch211-106f21.1
si:dkey-49n23.1	2.5111e-09	0.987006	0.361	0.159	5.10556e-05	r1 r2 & r4	si:dkey-49n23.1
epb41l4a	3.15745e-09	0.767533	0.429	0.204	6.41972e-05	r1 r2 & r4	epb41l4a
znf710a	3.19246e-09	0.913649	0.466	0.242	6.49091e-05	r1 r2 & r4	znf710a
mex3b	3.32033e-09	0.673953	0.624	0.359	6.7509e-05	r1 r2 & r4	mex3b
atp1a2a	3.82756e-09	1.03358	0.195	0.06	7.7822e-05	r1 r2 & r4	atp1a2a
tet1	3.90793e-09	1.02251	0.346	0.152	7.9456e-05	r1 r2 & r4	tet1
map2k6	5.10597e-09	0.771829	0.481	0.247	0.000103815	r1 r2 & r4	map2k6
tet2	5.50689e-09	0.738415	0.722	0.484	0.000111966	r1 r2 & r4	tet2
nr2f5	6.58127e-09	0.505797	0.857	0.59	0.00013381	r1 r2 & r4	nr2f5
nlgn3a	6.63796e-09	1.59716	0.226	0.079	0.000134963	r1 r2 & r4	nlgn3a
pola1	8.26775e-09	0.5381	0.729	0.46	0.0001681	r1 r2 & r4	pola1
sox19a	8.58267e-09	1.08067	0.271	0.104	0.000174503	r1 r2 & r4	sox19a
myh14	9.40367e-09	0.872493	0.391	0.186	0.000191195	r1 r2 & r4	myh14
htr3b	1.02962e-08	1.12721	0.301	0.127	0.000209343	r1 r2 & r4	htr3b
robo4	1.28322e-08	0.898966	0.383	0.175	0.000260904	r1 r2 & r4	robo4
slc25a21	1.33088e-08	0.967256	0.556	0.344	0.000270594	r1 r2 & r4	slc25a21
hs3st3b1b	1.69374e-08	0.851171	0.564	0.331	0.000344372	r1 r2 & r4	hs3st3b1b
bmpr1ab	2.01482e-08	0.608611	0.827	0.645	0.000409653	r1 r2 & r4	bmpr1ab
myclb	2.08581e-08	1.25779	0.346	0.165	0.000424086	r1 r2 & r4	myclb
si:dkey-195m11.8	2.26128e-08	0.642565	0.759	0.51	0.000459763	r1 r2 & r4	si:dkey-195m11.8
sox3	2.32404e-08	0.709357	0.564	0.316	0.000472524	r1 r2 & r4	sox3
plxnb1b	2.64147e-08	0.581005	0.774	0.523	0.000537064	r1 r2 & r4	plxnb1b
baz2ba	2.87095e-08	0.528547	0.925	0.837	0.000583721	r1 r2 & r4	baz2ba
nkd1	3.06493e-08	0.729021	0.571	0.332	0.000623161	r1 r2 & r4	nkd1
lin28a	3.09291e-08	0.613507	0.865	0.719	0.000628849	r1 r2 & r4	lin28a
dtnbp1b	3.86222e-08	1.07888	0.195	0.065	0.000785267	r1 r2 & r4	dtnbp1b
pou3f2b	4.71966e-08	0.848907	0.323	0.144	0.000959602	r1 r2 & r4	pou3f2b
ccdc88c	4.75316e-08	0.675159	0.624	0.376	0.000966412	r1 r2 & r4	ccdc88c
rrm1	4.81511e-08	0.875721	0.481	0.275	0.000979009	r1 r2 & r4	rrm1
crb2a	5.07291e-08	0.622741	0.699	0.43	0.00103142	r1 r2 & r4	crb2a
irx4b	6.67441e-08	0.977011	0.128	0.033	0.00135704	r1 r2 & r4	irx4b
zeb2b	7.75568e-08	1.0845	0.271	0.112	0.00157689	r1 r2 & r4	zeb2b
ulk1b	8.61865e-08	1.03379	0.421	0.225	0.00175234	r1 r2 & r4	ulk1b
plagl2	9.1772e-08	0.647189	0.774	0.604	0.00186591	r1 r2 & r4	plagl2
sb:cb81	9.24932e-08	0.632773	0.609	0.373	0.00188057	r1 r2 & r4	sb:cb81
atp8a1	1.04621e-07	0.838122	0.504	0.296	0.00212715	r1 r2 & r4	atp8a1
neo1b	1.04859e-07	0.633261	0.714	0.497	0.00213199	r1 r2 & r4	neo1b
ptpro.1	1.10479e-07	0.843541	0.135	0.037	0.00224625	r1 r2 & r4	ptpro.1
tprn	1.10643e-07	0.883912	0.308	0.139	0.0022496	r1 r2 & r4	tprn
fgf3	1.35965e-07	0.814956	0.105	0.024	0.00276444	r1 r2 & r4	fgf3
kaznb	1.37415e-07	0.622753	0.647	0.423	0.00279392	r1 r2 & r4	kaznb
wasf3b	1.66384e-07	0.638077	0.639	0.421	0.00338292	r1 r2 & r4	wasf3b
ogdha	1.66548e-07	0.860955	0.639	0.434	0.00338625	r1 r2 & r4	ogdha
rassf2a	1.73652e-07	0.727585	0.617	0.386	0.00353068	r1 r2 & r4	rassf2a
greb1	1.76209e-07	0.609681	0.729	0.515	0.00358267	r1 r2 & r4	greb1
her8.2	1.85041e-07	1.01696	0.135	0.038	0.00376226	r1 r2 & r4	her8.2
sfrp5	1.85897e-07	0.787863	0.383	0.191	0.00377965	r1 r2 & r4	sfrp5
igf2b	2.11994e-07	0.854496	0.421	0.219	0.00431026	r1 r2 & r4	igf2b
ATP8A1	2.27731e-07	0.639451	0.451	0.24	0.00463022	r1 r2 & r4	ATP8A1
gulp1b	2.92559e-07	1.051	0.218	0.086	0.0059483	r1 r2 & r4	gulp1b
adcyap1r1a	3.41533e-07	0.7305	0.143	0.042	0.00694405	r1 r2 & r4	adcyap1r1a
zic2a	3.83836e-07	1.32509	0.195	0.073	0.00780415	r1 r2 & r4	zic2a
rrm2.1	3.90131e-07	0.625804	0.729	0.54	0.00793214	r1 r2 & r4	rrm2.1
slc4a10a	4.01117e-07	1.05044	0.226	0.091	0.00815552	r1 r2 & r4	slc4a10a
cbx5	4.03513e-07	0.688681	0.504	0.297	0.00820422	r1 r2 & r4	cbx5
si:ch211-269k10.2	4.38897e-07	0.725808	0.481	0.278	0.00892366	r1 r2 & r4	si:ch211-269k10.2
neo1a	4.40063e-07	0.490565	0.977	0.912	0.00894736	r1 r2 & r4	neo1a
si:ch211-286o17.1	4.85504e-07	0.785926	0.444	0.248	0.00987126	r1 r2 & r4	si:ch211-286o17.1
ctnnd2b	5.02495e-07	0.592948	0.504	0.281	0.0102167	r1 r2 & r4	ctnnd2b
pax7b	5.99314e-07	1.03029	0.195	0.073	0.0121853	r1 r2 & r4	pax7b
lrp5	6.19803e-07	0.518889	0.865	0.716	0.0126018	r1 r2 & r4	lrp5
tigara	6.26384e-07	0.756983	0.113	0.029	0.0127356	r1 r2 & r4	tigara
mus81	6.58069e-07	0.677195	0.526	0.33	0.0133799	r1 r2 & r4	mus81
macf1b	6.75251e-07	0.856505	0.15	0.048	0.0137292	r1 r2 & r4	macf1b
htr3a	6.80538e-07	0.934372	0.316	0.153	0.0138367	r1 r2 & r4	htr3a
ephb3a	6.83188e-07	0.792057	0.391	0.207	0.0138906	r1 r2 & r4	ephb3a
slc7a3a	7.81357e-07	0.741618	0.504	0.313	0.0158866	r1 r2 & r4	slc7a3a
ctdp1	8.92165e-07	0.403208	0.865	0.697	0.0181395	r1 r2 & r4	ctdp1
zic1	9.83018e-07	0.935873	0.113	0.031	0.0199867	r1 r2 & r4	zic1
pfkfb3	1.01333e-06	0.799985	0.316	0.153	0.0206031	r1 r2 & r4	pfkfb3
skp2	1.02949e-06	0.901644	0.323	0.162	0.0209317	r1 r2 & r4	skp2
cdk6	1.03693e-06	0.532847	0.662	0.433	0.0210829	r1 r2 & r4	cdk6
gas1b	1.0508e-06	0.69346	0.526	0.329	0.0213649	r1 r2 & r4	gas1b
selplg	1.12358e-06	0.723028	0.105	0.027	0.0228445	r1 r2 & r4	selplg
abcb5	1.19723e-06	0.766508	0.406	0.221	0.024342	r1 r2 & r4	abcb5
CABZ01053976.1	1.31837e-06	0.891091	0.256	0.114	0.026805	r1 r2 & r4	CABZ01053976.1
gfap	1.3373e-06	0.639582	0.451	0.251	0.0271899	r1 r2 & r4	gfap
wwtr1	1.36477e-06	0.746063	0.474	0.293	0.0277485	r1 r2 & r4	wwtr1
lhfpl2b	1.38656e-06	0.758822	0.263	0.117	0.0281916	r1 r2 & r4	lhfpl2b
lig1	1.39262e-06	0.65922	0.549	0.342	0.0283147	r1 r2 & r4	lig1
si:ch1073-186i23.1	1.45036e-06	0.690336	0.376	0.2	0.0294887	r1 r2 & r4	si:ch1073-186i23.1
pcdh1g32	1.55061e-06	0.960372	0.15	0.051	0.0315271	r1 r2 & r4	pcdh1g32
egfra	1.56806e-06	1.06132	0.256	0.117	0.0318818	r1 r2 & r4	egfra
sulf2b	1.5948e-06	1.41073	0.18	0.067	0.0324254	r1 r2 & r4	sulf2b
tpx2	1.60468e-06	0.742987	0.526	0.345	0.0326263	r1 r2 & r4	tpx2
lrp8	1.67998e-06	0.539665	0.602	0.392	0.0341573	r1 r2 & r4	lrp8
fabp3	1.83551e-06	0.628313	0.421	0.231	0.0373195	r1 r2 & r4	fabp3
sox11a	1.91069e-06	0.475864	0.782	0.554	0.0388482	r1 r2 & r4	sox11a
gulp1a	1.94263e-06	0.925129	0.316	0.16	0.0394976	r1 r2 & r4	gulp1a
tead1b	1.97944e-06	0.694499	0.692	0.519	0.0402459	r1 r2 & r4	tead1b
metrn	2.03906e-06	0.604853	0.571	0.379	0.0414581	r1 r2 & r4	metrn
si:ch211-157p22.10	2.04101e-06	0.7014	0.173	0.063	0.0414979	r1 r2 & r4	si:ch211-157p22.10
cita	2.04897e-06	0.721828	0.496	0.314	0.0416597	r1 r2 & r4	cita
mis18bp1	2.08138e-06	0.697316	0.271	0.123	0.0423186	r1 r2 & r4	mis18bp1
ek1	2.25492e-06	0.305145	0.308	0.142	0.0458471	r1 r2 & r4	ek1
si:ch211-212k18.5	2.37934e-06	0.746087	0.459	0.277	0.0483767	r1 r2 & r4	si:ch211-212k18.5
si:ch211-214c7.4	2.7098e-06	0.662911	0.429	0.244	0.0550957	r1 r2 & r4	si:ch211-214c7.4
adgrl3.1	2.90191e-06	0.579134	0.406	0.215	0.0590016	r1 r2 & r4	adgrl3.1
dnmt1	3.09882e-06	0.901739	0.331	0.182	0.0630053	r1 r2 & r4	dnmt1
fgfr2	3.21175e-06	0.389032	0.925	0.783	0.0653012	r1 r2 & r4	fgfr2
cers6	3.5688e-06	0.987289	0.143	0.048	0.0725608	r1 r2 & r4	cers6
sfrp1a	3.58919e-06	1.02004	0.211	0.089	0.0729754	r1 r2 & r4	sfrp1a
znf1026	3.6608e-06	0.728211	0.218	0.092	0.0744313	r1 r2 & r4	znf1026
tuba1c	3.71625e-06	0.68807	0.135	0.044	0.0755589	r1 r2 & r4	tuba1c
micall2b	3.75329e-06	0.793686	0.233	0.101	0.0763118	r1 r2 & r4	micall2b
si:dkey-108k21.10	3.75356e-06	0.595481	0.504	0.301	0.0763175	r1 r2 & r4	si:dkey-108k21.10
smc4	3.80742e-06	0.592478	0.541	0.346	0.0774125	r1 r2 & r4	smc4
adcy2a	4.26494e-06	0.877791	0.143	0.048	0.0867148	r1 r2 & r4	adcy2a
magi2a	4.30096e-06	0.494058	0.526	0.317	0.087447	r1 r2 & r4	magi2a
hhat	4.36798e-06	0.935717	0.143	0.049	0.0888097	r1 r2 & r4	hhat
hnrnpa1a	4.5155e-06	0.563724	0.564	0.355	0.0918092	r1 r2 & r4	hnrnpa1a
men1	4.61036e-06	0.704215	0.293	0.143	0.0937379	r1 r2 & r4	men1
rbbp4	4.66428e-06	0.67759	0.414	0.235	0.0948341	r1 r2 & r4	rbbp4
lrrn1	5.5005e-06	0.776936	0.406	0.24	0.111836	r1 r2 & r4	lrrn1
gng2	5.672e-06	0.794363	0.256	0.119	0.115323	r1 r2 & r4	gng2
clstn1	6.18627e-06	0.697409	0.316	0.16	0.125779	r1 r2 & r4	clstn1
arhgap21a	6.67569e-06	0.598125	0.406	0.228	0.13573	r1 r2 & r4	arhgap21a
rrm2	6.76743e-06	0.537831	0.534	0.33	0.137595	r1 r2 & r4	rrm2
sox11b	6.7915e-06	0.843475	0.414	0.246	0.138085	r1 r2 & r4	sox11b
fsta	7.66641e-06	0.892081	0.263	0.127	0.155874	r1 r2 & r4	fsta
igbp1	7.83347e-06	0.814716	0.15	0.054	0.15927	r1 r2 & r4	igbp1
slc4a7	7.91487e-06	0.637748	0.541	0.385	0.160925	r1 r2 & r4	slc4a7
tmcc3	8.15517e-06	0.615198	0.489	0.3	0.165811	r1 r2 & r4	tmcc3
zgc:110366	8.8733e-06	0.814716	0.158	0.059	0.180412	r1 r2 & r4	zgc:110366
ext1a	9.12954e-06	0.654667	0.737	0.581	0.185622	r1 r2 & r4	ext1a
mki67	9.14498e-06	0.363322	0.82	0.605	0.185936	r1 r2 & r4	mki67
si:dkey-244a7.1	9.71742e-06	0.610431	0.617	0.445	0.197575	r1 r2 & r4	si:dkey-244a7.1
eme1	9.99592e-06	0.774438	0.444	0.278	0.203237	r1 r2 & r4	eme1
dtx4a	1.01725e-05	0.671671	0.526	0.346	0.206827	r1 r2 & r4	dtx4a
angptl4	1.02573e-05	0.589163	0.526	0.351	0.208552	r1 r2 & r4	angptl4
dnajc24	1.05252e-05	0.937577	0.135	0.047	0.213999	r1 r2 & r4	dnajc24
BX664742.3	1.05848e-05	0.737716	0.135	0.047	0.215209	r1 r2 & r4	BX664742.3
hmgn2	1.05976e-05	0.565027	0.571	0.397	0.215471	r1 r2 & r4	hmgn2
ep300b	1.08353e-05	0.428236	0.722	0.55	0.220304	r1 r2 & r4	ep300b
mllt10	1.1005e-05	0.494136	0.85	0.727	0.223754	r1 r2 & r4	mllt10
dtl	1.10639e-05	0.707966	0.361	0.197	0.22495	r1 r2 & r4	dtl
atf3	1.1078e-05	0.549184	0.759	0.604	0.225239	r1 r2 & r4	atf3
letm1	1.11122e-05	0.771573	0.421	0.258	0.225933	r1 r2 & r4	letm1
LO018022.1	1.13539e-05	0.705678	0.241	0.111	0.230847	r1 r2 & r4	LO018022.1
frmd4ba	1.16004e-05	0.386651	0.744	0.522	0.235859	r1 r2 & r4	frmd4ba
jarid2b	1.19382e-05	0.424504	0.947	0.843	0.242727	r1 r2 & r4	jarid2b
SLC7A1	1.19948e-05	0.78459	0.308	0.162	0.243878	r1 r2 & r4	SLC7A1
bcar3	1.20706e-05	0.402686	0.556	0.353	0.24542	r1 r2 & r4	bcar3
aldob	1.2502e-05	0.837756	0.263	0.129	0.254191	r1 r2 & r4	aldob
kif1aa	1.27953e-05	0.542931	0.195	0.082	0.260154	r1 r2 & r4	kif1aa
ptmaa	1.28406e-05	0.592308	0.549	0.36	0.261076	r1 r2 & r4	ptmaa
samhd1	1.29021e-05	0.596672	0.113	0.035	0.262325	r1 r2 & r4	samhd1
las1l	1.3983e-05	0.64863	0.361	0.198	0.284302	r1 r2 & r4	las1l
cemip2	1.43658e-05	0.527568	0.684	0.488	0.292085	r1 r2 & r4	cemip2
pygo1	1.44881e-05	0.730265	0.135	0.047	0.294572	r1 r2 & r4	pygo1
pou3f3a	1.46586e-05	0.679353	0.293	0.148	0.298038	r1 r2 & r4	pou3f3a
e2f3	1.49498e-05	0.533046	0.624	0.444	0.303958	r1 r2 & r4	e2f3
rab11fip3	1.56355e-05	0.658237	0.444	0.273	0.3179	r1 r2 & r4	rab11fip3
BX571678.1	1.56587e-05	0.714893	0.105	0.032	0.318372	r1 r2 & r4	BX571678.1
xpc	1.61392e-05	0.7335	0.338	0.185	0.328142	r1 r2 & r4	xpc
tubb2b	1.74217e-05	0.570011	0.534	0.345	0.354218	r1 r2 & r4	tubb2b
sox19b	1.79751e-05	0.671361	0.195	0.083	0.365469	r1 r2 & r4	sox19b
si:dkey-157g16.6	1.86907e-05	0.630604	0.481	0.312	0.38002	r1 r2 & r4	si:dkey-157g16.6
si:ch73-386h18.1	1.91419e-05	0.600023	0.534	0.367	0.389193	r1 r2 & r4	si:ch73-386h18.1
tead1a	1.93953e-05	0.48351	0.88	0.771	0.394346	r1 r2 & r4	tead1a
zgc:100920	1.95869e-05	0.702248	0.15	0.057	0.398241	r1 r2 & r4	zgc:100920
pole	1.97765e-05	0.619884	0.414	0.241	0.402096	r1 r2 & r4	pole
sass6	2.12005e-05	0.793283	0.278	0.144	0.431048	r1 r2 & r4	sass6
clic4	2.18584e-05	0.437193	0.767	0.569	0.444424	r1 r2 & r4	clic4
nav2a	2.21241e-05	0.384959	0.579	0.396	0.449827	r1 r2 & r4	nav2a
inpp4ab	2.24636e-05	0.771028	0.15	0.057	0.456729	r1 r2 & r4	inpp4ab
ercc1	2.31245e-05	0.730294	0.256	0.126	0.470167	r1 r2 & r4	ercc1
brip1	2.34696e-05	0.734856	0.376	0.218	0.477185	r1 r2 & r4	brip1
cbx8a	2.36691e-05	0.671414	0.226	0.104	0.48124	r1 r2 & r4	cbx8a
rpa1	2.60926e-05	0.623535	0.451	0.286	0.530514	r1 r2 & r4	rpa1
shisa3	2.67717e-05	0.738165	0.105	0.033	0.544322	r1 r2 & r4	shisa3
ptmab	2.76073e-05	0.372812	0.887	0.744	0.561311	r1 r2 & r4	ptmab
tmem35	2.8199e-05	0.743112	0.331	0.186	0.573342	r1 r2 & r4	tmem35
LO018148.1	2.82398e-05	0.490757	0.609	0.422	0.574173	r1 r2 & r4	LO018148.1
unc119b	2.86466e-05	0.693532	0.226	0.106	0.582443	r1 r2 & r4	unc119b
cacna1sb	2.97653e-05	0.723434	0.18	0.076	0.605188	r1 r2 & r4	cacna1sb
arxa	3.13295e-05	0.600266	0.105	0.033	0.636991	r1 r2 & r4	arxa
snx33	3.32494e-05	0.728793	0.226	0.107	0.676026	r1 r2 & r4	snx33
iffo1b	3.3807e-05	0.720463	0.158	0.063	0.687365	r1 r2 & r4	iffo1b
pola2	3.47828e-05	0.775452	0.226	0.108	0.707205	r1 r2 & r4	pola2
atp6v0b	3.66269e-05	0.715676	0.18	0.077	0.744699	r1 r2 & r4	atp6v0b
phf21aa	3.70036e-05	0.712118	0.383	0.231	0.752358	r1 r2 & r4	phf21aa
cep152	3.82753e-05	0.630677	0.308	0.164	0.778213	r1 r2 & r4	cep152
zgc:153405	3.8929e-05	0.656698	0.406	0.247	0.791504	r1 r2 & r4	zgc:153405
zeb2a	4.10357e-05	0.416102	0.782	0.599	0.834337	r1 r2 & r4	zeb2a
si:dkey-85n7.7	4.23914e-05	0.602734	0.105	0.034	0.861901	r1 r2 & r4	si:dkey-85n7.7
cdc14b	4.27624e-05	0.49179	0.737	0.571	0.869445	r1 r2 & r4	cdc14b
CU695011.2	4.31557e-05	0.907811	0.165	0.07	0.877443	r1 r2 & r4	CU695011.2
podxl	4.36106e-05	0.287254	0.361	0.201	0.88669	r1 r2 & r4	podxl
igf2bp1	4.40005e-05	0.400722	0.94	0.851	0.894618	r1 r2 & r4	igf2bp1
plppr3a	4.48282e-05	0.581898	0.504	0.336	0.911447	r1 r2 & r4	plppr3a
ssbp4	4.51496e-05	0.340039	0.714	0.53	0.917982	r1 r2 & r4	ssbp4
pax3a	4.55741e-05	0.418009	0.398	0.235	0.926612	r1 r2 & r4	pax3a
si:dkey-56m19.5	4.57599e-05	0.50821	0.474	0.301	0.93039	r1 r2 & r4	si:dkey-56m19.5
fam168a	4.62006e-05	0.486788	0.654	0.499	0.939351	r1 r2 & r4	fam168a
rhobtb2b	4.90028e-05	0.774927	0.165	0.069	0.996324	r1 r2 & r4	rhobtb2b
si:ch1073-303k11.2	4.9619e-05	0.536118	0.241	0.116	1	r1 r2 & r4	si:ch1073-303k11.2
znf576.1	5.11392e-05	0.906694	0.256	0.133	1	r1 r2 & r4	znf576.1
arhgap35a	5.30571e-05	0.438093	0.872	0.75	1	r1 r2 & r4	arhgap35a
atad5a	5.39236e-05	0.49224	0.451	0.28	1	r1 r2 & r4	atad5a
stag2b	5.49336e-05	0.597208	0.609	0.481	1	r1 r2 & r4	stag2b
arfgef1	5.65705e-05	0.585806	0.489	0.32	1	r1 r2 & r4	arfgef1
hmgb1a	5.67568e-05	0.57033	0.564	0.399	1	r1 r2 & r4	hmgb1a
kidins220b	5.69072e-05	0.638967	0.271	0.14	1	r1 r2 & r4	kidins220b
si:ch73-364h19.1	5.81153e-05	0.554802	0.376	0.218	1	r1 r2 & r4	si:ch73-364h19.1
ADAMTS7	5.83279e-05	0.849919	0.278	0.154	1	r1 r2 & r4	ADAMTS7
fgd4a	6.00646e-05	0.894135	0.241	0.122	1	r1 r2 & r4	fgd4a
marcksl1a	6.16361e-05	0.460528	0.744	0.593	1	r1 r2 & r4	marcksl1a
saal1	6.38459e-05	0.69185	0.143	0.056	1	r1 r2 & r4	saal1
spata13	6.61832e-05	0.600858	0.271	0.142	1	r1 r2 & r4	spata13
egfl6	6.71144e-05	0.850177	0.263	0.141	1	r1 r2 & r4	egfl6
ccnf	6.89041e-05	0.53955	0.556	0.389	1	r1 r2 & r4	ccnf
lrch4	6.92436e-05	0.381568	0.624	0.42	1	r1 r2 & r4	lrch4
ssh1a	6.96047e-05	0.662982	0.256	0.13	1	r1 r2 & r4	ssh1a
chaf1a	7.03713e-05	0.463676	0.639	0.468	1	r1 r2 & r4	chaf1a
mlh3	7.66134e-05	0.615501	0.218	0.104	1	r1 r2 & r4	mlh3
fxyd6l	7.73772e-05	0.673861	0.323	0.183	1	r1 r2 & r4	fxyd6l
CABZ01032476.1	7.7803e-05	0.677337	0.105	0.035	1	r1 r2 & r4	CABZ01032476.1
abca3b	8.36382e-05	0.546032	0.579	0.414	1	r1 r2 & r4	abca3b
baz1a.1	8.6189e-05	0.563949	0.391	0.24	1	r1 r2 & r4	baz1a.1
efnb2b	8.68573e-05	0.314299	0.624	0.432	1	r1 r2 & r4	efnb2b
tfdp2	8.70224e-05	0.404341	0.398	0.234	1	r1 r2 & r4	tfdp2
lrrtm1	8.93075e-05	0.584624	0.105	0.035	1	r1 r2 & r4	lrrtm1
fam167ab	8.93196e-05	0.559206	0.286	0.153	1	r1 r2 & r4	fam167ab
cxadr	9.44025e-05	0.352206	0.707	0.494	1	r1 r2 & r4	cxadr
cercam	9.58871e-05	0.700271	0.278	0.149	1	r1 r2 & r4	cercam
tmeff1b	9.68717e-05	0.628765	0.466	0.317	1	r1 r2 & r4	tmeff1b
irx5a	9.7512e-05	0.697782	0.135	0.053	1	r1 r2 & r4	irx5a
pbx4	9.99589e-05	0.376287	0.835	0.744	1	r1 r2 & r4	pbx4
wdhd1	0.000108354	0.639841	0.346	0.206	1	r1 r2 & r4	wdhd1
hmmr	0.000108744	1.01448	0.278	0.16	1	r1 r2 & r4	hmmr
adap2	0.000109088	0.675722	0.173	0.077	1	r1 r2 & r4	adap2
supt16h	0.000114739	0.54234	0.541	0.368	1	r1 r2 & r4	supt16h
mylk3	0.000121993	0.661045	0.323	0.187	1	r1 r2 & r4	mylk3
tmem235b	0.00012406	0.548789	0.233	0.116	1	r1 r2 & r4	tmem235b
magoh	0.000128189	0.649144	0.18	0.082	1	r1 r2 & r4	magoh
dlgap5	0.000128941	0.409045	0.647	0.468	1	r1 r2 & r4	dlgap5
adgrl1a	0.000130542	0.401382	0.316	0.178	1	r1 r2 & r4	adgrl1a
si:dkey-172k15.6	0.000131546	0.676265	0.15	0.063	1	r1 r2 & r4	si:dkey-172k15.6
fhod3b	0.000132811	1.02672	0.353	0.228	1	r1 r2 & r4	fhod3b
top2a	0.000132928	0.512119	0.481	0.316	1	r1 r2 & r4	top2a
ncoa5	0.000135917	0.71469	0.263	0.143	1	r1 r2 & r4	ncoa5
znf1183	0.000136856	0.551342	0.526	0.366	1	r1 r2 & r4	znf1183
mb21d2	0.000137673	0.654036	0.113	0.041	1	r1 r2 & r4	mb21d2
cenpk	0.000139678	0.551446	0.368	0.223	1	r1 r2 & r4	cenpk
fgfr4	0.000145513	0.505418	0.414	0.261	1	r1 r2 & r4	fgfr4
uacab	0.000145833	0.812606	0.331	0.203	1	r1 r2 & r4	uacab
msh6	0.000145962	0.529838	0.436	0.277	1	r1 r2 & r4	msh6
C21H18orf25	0.00014658	0.707542	0.368	0.231	1	r1 r2 & r4	C21H18orf25
nup160	0.000153492	0.656223	0.316	0.183	1	r1 r2 & r4	nup160
cd82a	0.000153499	0.611747	0.233	0.118	1	r1 r2 & r4	cd82a
gk5	0.000154393	0.671478	0.256	0.136	1	r1 r2 & r4	gk5
phf21ab	0.000156464	0.517474	0.474	0.316	1	r1 r2 & r4	phf21ab
tbc1d16	0.00015648	0.472343	0.233	0.116	1	r1 r2 & r4	tbc1d16
prim2	0.000156742	0.575924	0.541	0.392	1	r1 r2 & r4	prim2
si:ch211-272n13.3	0.000156832	0.667402	0.451	0.309	1	r1 r2 & r4	si:ch211-272n13.3
slc23a2	0.000160146	0.5447	0.451	0.299	1	r1 r2 & r4	slc23a2
zdhhc18b	0.000160229	0.694449	0.158	0.069	1	r1 r2 & r4	zdhhc18b
NPAS3	0.000163044	1.26402	0.211	0.111	1	r1 r2 & r4	NPAS3
hmgb2b	0.000164511	0.487159	0.504	0.335	1	r1 r2 & r4	hmgb2b
rnf220a	0.000168785	0.504063	0.534	0.365	1	r1 r2 & r4	rnf220a
mibp	0.000175691	0.60341	0.459	0.317	1	r1 r2 & r4	mibp
atad2	0.000179044	0.570423	0.323	0.19	1	r1 r2 & r4	atad2
trps1	0.000181671	0.329124	0.835	0.717	1	r1 r2 & r4	trps1
ccne2	0.000182032	0.698928	0.429	0.288	1	r1 r2 & r4	ccne2
hs2st1b	0.000188468	0.542328	0.466	0.323	1	r1 r2 & r4	hs2st1b
usp28	0.000193995	0.700978	0.188	0.089	1	r1 r2 & r4	usp28
itpr2	0.000197788	0.690591	0.18	0.085	1	r1 r2 & r4	itpr2
nusap1	0.000208251	0.590069	0.376	0.237	1	r1 r2 & r4	nusap1
cspg5a	0.000209383	0.568957	0.406	0.254	1	r1 r2 & r4	cspg5a
tardbpl	0.000212427	0.403521	0.752	0.566	1	r1 r2 & r4	tardbpl
ankrd11	0.000212969	0.307843	0.872	0.81	1	r1 r2 & r4	ankrd11
arvcfb	0.000213574	0.661955	0.624	0.497	1	r1 r2 & r4	arvcfb
dctd	0.000215627	0.657162	0.211	0.106	1	r1 r2 & r4	dctd
fhdc1	0.0002169	0.618446	0.331	0.196	1	r1 r2 & r4	fhdc1
kntc1	0.000217999	0.678079	0.346	0.212	1	r1 r2 & r4	kntc1
recql4	0.000219845	0.625819	0.256	0.139	1	r1 r2 & r4	recql4
ryk	0.000221982	0.463364	0.602	0.431	1	r1 r2 & r4	ryk
ctnna2	0.000224245	0.336342	0.338	0.202	1	r1 r2 & r4	ctnna2
map7d1a	0.000228447	0.359465	0.654	0.462	1	r1 r2 & r4	map7d1a
rgs7a	0.000240547	0.660788	0.128	0.051	1	r1 r2 & r4	rgs7a
nsd2	0.000242644	0.555945	0.429	0.281	1	r1 r2 & r4	nsd2
tmem9b	0.000245701	0.580517	0.188	0.089	1	r1 r2 & r4	tmem9b
pcnt	0.000248026	0.58647	0.564	0.412	1	r1 r2 & r4	pcnt
scube2	0.000253915	0.757954	0.414	0.275	1	r1 r2 & r4	scube2
si:ch73-376l24.2	0.00025483	0.410539	0.699	0.566	1	r1 r2 & r4	si:ch73-376l24.2
atad2b	0.000255023	0.414036	0.699	0.56	1	r1 r2 & r4	atad2b
pknox2	0.000259533	0.466449	0.421	0.281	1	r1 r2 & r4	pknox2
si:dkeyp-110a12.4	0.000261394	0.575949	0.113	0.042	1	r1 r2 & r4	si:dkeyp-110a12.4
galt	0.000263355	0.641252	0.429	0.286	1	r1 r2 & r4	galt
aff2	0.000264069	0.332837	0.556	0.378	1	r1 r2 & r4	aff2
fam168b	0.000264505	0.430262	0.511	0.35	1	r1 r2 & r4	fam168b
cdk12	0.00026807	0.417316	0.737	0.572	1	r1 r2 & r4	cdk12
rasl11b	0.000277392	0.706876	0.188	0.092	1	r1 r2 & r4	rasl11b
atrx	0.00028373	0.348886	0.729	0.566	1	r1 r2 & r4	atrx
zdhhc20a	0.000283798	0.682434	0.218	0.113	1	r1 r2 & r4	zdhhc20a
fgfr1b	0.000284448	0.336079	0.865	0.727	1	r1 r2 & r4	fgfr1b
si:dkeyp-68b7.5	0.000287959	0.750658	0.316	0.194	1	r1 r2 & r4	si:dkeyp-68b7.5
ncapd2	0.000290957	0.653924	0.383	0.249	1	r1 r2 & r4	ncapd2
brwd3	0.000296891	0.595958	0.353	0.217	1	r1 r2 & r4	brwd3
tox3	0.000302737	0.321803	0.398	0.242	1	r1 r2 & r4	tox3
ror1	0.000309256	0.628722	0.444	0.316	1	r1 r2 & r4	ror1
slc25a18	0.000312322	0.502188	0.436	0.295	1	r1 r2 & r4	slc25a18
hsh2d	0.000313025	0.521692	0.421	0.274	1	r1 r2 & r4	hsh2d
spop	0.000313765	0.400416	0.684	0.536	1	r1 r2 & r4	spop
si:dkey-1j5.4	0.000314688	0.629867	0.233	0.124	1	r1 r2 & r4	si:dkey-1j5.4
pdzd2	0.000314802	0.535415	0.398	0.258	1	r1 r2 & r4	pdzd2
hcfc1b	0.00032447	0.406443	0.677	0.526	1	r1 r2 & r4	hcfc1b
ctcf	0.000324809	0.5147	0.414	0.27	1	r1 r2 & r4	ctcf
cep170b	0.000328747	0.582162	0.15	0.066	1	r1 r2 & r4	cep170b
CACFD1	0.00033529	0.548941	0.158	0.071	1	r1 r2 & r4	CACFD1
FO681286.1	0.000339903	0.55364	0.158	0.071	1	r1 r2 & r4	FO681286.1
kcnh6a	0.00036932	0.40538	0.256	0.137	1	r1 r2 & r4	kcnh6a
casz1	0.000372236	0.695835	0.195	0.098	1	r1 r2 & r4	casz1
si:ch73-335l21.1	0.000372444	0.507191	0.301	0.175	1	r1 r2 & r4	si:ch73-335l21.1
GCA	0.000377916	0.626456	0.233	0.126	1	r1 r2 & r4	GCA
myh11b	0.000379138	0.547556	0.286	0.162	1	r1 r2 & r4	myh11b
vps8	0.000381271	0.673137	0.436	0.296	1	r1 r2 & r4	vps8
mlsl	0.000386442	0.605743	0.218	0.114	1	r1 r2 & r4	mlsl
si:ch211-152c2.3	0.000386453	0.6521	0.135	0.057	1	r1 r2 & r4	si:ch211-152c2.3
tfb1m	0.000391348	0.641113	0.18	0.088	1	r1 r2 & r4	tfb1m
ncalda	0.000391718	0.464395	0.609	0.46	1	r1 r2 & r4	ncalda
srek1ip1	0.000405286	0.697782	0.128	0.054	1	r1 r2 & r4	srek1ip1
si:ch211-288g17.3	0.000414924	0.458805	0.511	0.36	1	r1 r2 & r4	si:ch211-288g17.3
ccdc15	0.000415447	0.671316	0.143	0.063	1	r1 r2 & r4	ccdc15
si:dkey-276j7.1	0.000423525	0.684506	0.165	0.078	1	r1 r2 & r4	si:dkey-276j7.1
cdc7	0.000425592	0.667686	0.218	0.116	1	r1 r2 & r4	cdc7
sema3gb	0.000430382	0.689639	0.278	0.159	1	r1 r2 & r4	sema3gb
plk1	0.000430741	0.439283	0.489	0.332	1	r1 r2 & r4	plk1
brd7	0.000432184	0.514139	0.368	0.235	1	r1 r2 & r4	brd7
dph5	0.000436438	0.754197	0.15	0.068	1	r1 r2 & r4	dph5
stox2b	0.000439267	0.496657	0.609	0.463	1	r1 r2 & r4	stox2b
greb1l	0.00044418	0.263429	0.744	0.553	1	r1 r2 & r4	greb1l
znf865	0.000453784	0.518924	0.504	0.351	1	r1 r2 & r4	znf865
kdm7ab	0.000458362	0.344923	0.549	0.379	1	r1 r2 & r4	kdm7ab
rtn1a	0.000465247	0.51714	0.195	0.097	1	r1 r2 & r4	rtn1a
fsd1	0.000468167	0.551818	0.135	0.058	1	r1 r2 & r4	fsd1
si:dkey-34e4.1	0.000477278	0.621581	0.218	0.116	1	r1 r2 & r4	si:dkey-34e4.1
carm1	0.000489516	0.392775	0.541	0.377	1	r1 r2 & r4	carm1
zgc:112083	0.000497645	0.734777	0.218	0.118	1	r1 r2 & r4	zgc:112083
eif4g3a	0.000499465	0.511331	0.429	0.296	1	r1 r2 & r4	eif4g3a
si:dkeyp-118b1.2	0.000508272	0.544481	0.128	0.054	1	r1 r2 & r4	si:dkeyp-118b1.2
mcm4	0.00052401	0.431645	0.346	0.209	1	r1 r2 & r4	mcm4
grip1	0.000526054	0.434398	0.459	0.306	1	r1 r2 & r4	grip1
BX511034.7	0.00055753	0.654308	0.218	0.116	1	r1 r2 & r4	BX511034.7
abi1b	0.000571741	0.588239	0.308	0.188	1	r1 r2 & r4	abi1b
klf12b	0.000582464	0.47346	0.353	0.222	1	r1 r2 & r4	klf12b
usp1	0.000582857	0.579993	0.346	0.217	1	r1 r2 & r4	usp1
tnc	0.000591207	0.445879	0.338	0.206	1	r1 r2 & r4	tnc
naif1	0.000592274	0.732058	0.113	0.046	1	r1 r2 & r4	naif1
cbx3a	0.000619907	0.470605	0.436	0.296	1	r1 r2 & r4	cbx3a
fbxw7	0.000620367	0.29928	0.925	0.874	1	r1 r2 & r4	fbxw7
nin	0.000621402	0.53983	0.301	0.18	1	r1 r2 & r4	nin
cirbpa	0.000628567	0.309064	0.789	0.657	1	r1 r2 & r4	cirbpa
zdhhc15a	0.000634669	0.516801	0.218	0.116	1	r1 r2 & r4	zdhhc15a
mthfd1b	0.000644111	0.498499	0.526	0.389	1	r1 r2 & r4	mthfd1b
nbeab	0.000658934	0.486646	0.211	0.111	1	r1 r2 & r4	nbeab
si:ch211-113a14.19.1	0.000658959	0.554028	0.188	0.094	1	r1 r2 & r4	si:ch211-113a14.19.1
nf1b	0.000661867	0.565153	0.414	0.277	1	r1 r2 & r4	nf1b
lipg	0.000664497	0.576045	0.241	0.132	1	r1 r2 & r4	lipg
smyd4	0.000665903	0.541801	0.113	0.045	1	r1 r2 & r4	smyd4
si:ch211-185a18.2	0.000668609	0.300314	0.647	0.485	1	r1 r2 & r4	si:ch211-185a18.2
sh3bgr	0.00067299	0.566846	0.135	0.06	1	r1 r2 & r4	sh3bgr
racgap1	0.000679747	0.509691	0.481	0.341	1	r1 r2 & r4	racgap1
msna	0.000686499	0.40015	0.504	0.353	1	r1 r2 & r4	msna
marcksa	0.000692367	0.641153	0.331	0.211	1	r1 r2 & r4	marcksa
gatad1	0.000693748	0.562099	0.188	0.095	1	r1 r2 & r4	gatad1
si:ch73-281n10.2	0.000697599	0.333049	0.759	0.677	1	r1 r2 & r4	si:ch73-281n10.2
fasn	0.000738511	0.5858	0.286	0.17	1	r1 r2 & r4	fasn
malrd1	0.000739414	0.521458	0.271	0.158	1	r1 r2 & r4	malrd1
CABZ01037298.1	0.000746736	0.611967	0.278	0.168	1	r1 r2 & r4	CABZ01037298.1
lbr	0.000746965	0.374655	0.549	0.386	1	r1 r2 & r4	lbr
exoc6b	0.000752357	0.568524	0.429	0.3	1	r1 r2 & r4	exoc6b
uacaa	0.000753401	0.562826	0.263	0.152	1	r1 r2 & r4	uacaa
BX890572.2	0.00075508	0.665463	0.113	0.047	1	r1 r2 & r4	BX890572.2
rnd1b	0.000757188	0.665324	0.331	0.212	1	r1 r2 & r4	rnd1b
jam3b	0.000771123	0.464758	0.459	0.319	1	r1 r2 & r4	jam3b
tmem47	0.000785004	0.421342	0.308	0.184	1	r1 r2 & r4	tmem47
palm1b	0.000799523	0.679722	0.15	0.071	1	r1 r2 & r4	palm1b
kcnk5a	0.000808434	0.542086	0.218	0.117	1	r1 r2 & r4	kcnk5a
CR388132.2	0.000816212	0.639028	0.308	0.191	1	r1 r2 & r4	CR388132.2
slc29a4	0.000828396	0.574707	0.135	0.06	1	r1 r2 & r4	slc29a4
pdzd11	0.000846347	0.513548	0.12	0.051	1	r1 r2 & r4	pdzd11
hsph1	0.000849985	0.424949	0.571	0.427	1	r1 r2 & r4	hsph1
zgc:153426	0.000851044	0.68807	0.105	0.042	1	r1 r2 & r4	zgc:153426
ssrp1a	0.000854995	0.506168	0.504	0.367	1	r1 r2 & r4	ssrp1a
si:ch211-170d8.2	0.000858488	0.540703	0.143	0.065	1	r1 r2 & r4	si:ch211-170d8.2
ints8	0.000866402	0.357576	0.865	0.767	1	r1 r2 & r4	ints8
zgc:114130	0.000879019	0.542301	0.421	0.29	1	r1 r2 & r4	zgc:114130
KIF1C	0.000885183	0.497172	0.105	0.042	1	r1 r2 & r4	KIF1C
trim71	0.000890496	0.349645	0.857	0.72	1	r1 r2 & r4	trim71
khdrbs1a	0.00089476	0.291321	0.932	0.861	1	r1 r2 & r4	khdrbs1a
dpysl5a	0.000936439	0.574291	0.165	0.081	1	r1 r2 & r4	dpysl5a
tnika	0.000951348	0.417397	0.398	0.265	1	r1 r2 & r4	tnika
smarcb1a	0.000972778	0.544554	0.233	0.13	1	r1 r2 & r4	smarcb1a
kif23	0.000982233	0.504093	0.376	0.251	1	r1 r2 & r4	kif23
prkx	0.000997978	0.589582	0.286	0.172	1	r1 r2 & r4	prkx
recql5	0.00100391	0.481221	0.12	0.051	1	r1 r2 & r4	recql5
rspry1	0.00102563	0.594017	0.406	0.282	1	r1 r2 & r4	rspry1
klf7a	0.00104484	0.69346	0.398	0.278	1	r1 r2 & r4	klf7a
marcksb	0.00105088	0.552657	0.323	0.205	1	r1 r2 & r4	marcksb
top1l	0.00105089	0.414009	0.632	0.488	1	r1 r2 & r4	top1l
mief1	0.00105342	0.701508	0.158	0.078	1	r1 r2 & r4	mief1
srgap3	0.00105665	0.328701	0.571	0.406	1	r1 r2 & r4	srgap3
nsd3	0.00106257	0.382111	0.504	0.353	1	r1 r2 & r4	nsd3
lrrc42	0.00106812	0.638628	0.226	0.127	1	r1 r2 & r4	lrrc42
smarcd3b	0.00107316	0.506836	0.436	0.3	1	r1 r2 & r4	smarcd3b
elmod2	0.00112187	0.606721	0.278	0.169	1	r1 r2 & r4	elmod2
bmi1a	0.00112989	0.747535	0.15	0.073	1	r1 r2 & r4	bmi1a
fbxo16	0.0011376	0.413938	0.308	0.184	1	r1 r2 & r4	fbxo16
mtmr2	0.00114136	0.492048	0.12	0.052	1	r1 r2 & r4	mtmr2
nup93	0.00114664	0.437745	0.241	0.137	1	r1 r2 & r4	nup93
cep112	0.00118434	0.488431	0.489	0.36	1	r1 r2 & r4	cep112
opn1sw2	0.0012049	0.636771	0.195	0.106	1	r1 r2 & r4	opn1sw2
puf60a	0.00121926	0.358942	0.669	0.518	1	r1 r2 & r4	puf60a
nrxn3a	0.00126598	0.285952	0.233	0.126	1	r1 r2 & r4	nrxn3a
si:ch73-1a9.3	0.00127169	0.337855	0.805	0.67	1	r1 r2 & r4	si:ch73-1a9.3
CU137648.2	0.00127457	0.444428	0.519	0.381	1	r1 r2 & r4	CU137648.2
tox	0.00129833	0.346826	0.594	0.438	1	r1 r2 & r4	tox
tnpo2	0.00130398	0.413386	0.481	0.339	1	r1 r2 & r4	tnpo2
sinhcaf	0.00130973	0.521757	0.233	0.132	1	r1 r2 & r4	sinhcaf
smc2	0.00132918	0.633019	0.278	0.171	1	r1 r2 & r4	smc2
ctnnbip1	0.00133397	0.485009	0.308	0.192	1	r1 r2 & r4	ctnnbip1
fbxl6	0.0013452	0.565684	0.519	0.412	1	r1 r2 & r4	fbxl6
cobl	0.00134965	0.567034	0.195	0.104	1	r1 r2 & r4	cobl
mad2l1	0.00136206	0.528795	0.346	0.228	1	r1 r2 & r4	mad2l1
si:cabz01071912.2	0.00136368	0.483671	0.331	0.212	1	r1 r2 & r4	si:cabz01071912.2
cd226	0.00136455	0.549073	0.105	0.044	1	r1 r2 & r4	cd226
CR848788.1	0.00137317	0.568466	0.346	0.229	1	r1 r2 & r4	CR848788.1
brms1lb	0.00137843	0.5711	0.12	0.053	1	r1 r2 & r4	brms1lb
tmem229b	0.00138092	0.528756	0.158	0.077	1	r1 r2 & r4	tmem229b
shda	0.00139105	0.702235	0.158	0.079	1	r1 r2 & r4	shda
pyroxd2	0.00141338	0.63957	0.15	0.073	1	r1 r2 & r4	pyroxd2
slc12a4	0.00142612	0.610915	0.241	0.141	1	r1 r2 & r4	slc12a4
asmt	0.00143786	0.877791	0.113	0.05	1	r1 r2 & r4	asmt
fbxo5	0.0014433	0.571957	0.444	0.319	1	r1 r2 & r4	fbxo5
accs	0.00145095	0.716968	0.211	0.12	1	r1 r2 & r4	accs
rab39bb	0.00145443	0.671246	0.113	0.049	1	r1 r2 & r4	rab39bb
zgc:171759.1	0.00145724	0.654948	0.233	0.135	1	r1 r2 & r4	zgc:171759.1
plk4	0.0015044	0.442417	0.263	0.153	1	r1 r2 & r4	plk4
nsl1	0.00153845	0.534853	0.18	0.094	1	r1 r2 & r4	nsl1
zic3	0.00153947	0.911681	0.18	0.098	1	r1 r2 & r4	zic3
knl1	0.0015442	0.476576	0.263	0.156	1	r1 r2 & r4	knl1
rims1b	0.00154568	0.598721	0.346	0.227	1	r1 r2 & r4	rims1b
wdr76	0.00155017	0.643468	0.316	0.205	1	r1 r2 & r4	wdr76
ca16b	0.00157382	0.681257	0.12	0.054	1	r1 r2 & r4	ca16b
sumo3a	0.00158565	0.5566	0.271	0.164	1	r1 r2 & r4	sumo3a
grasp	0.00159102	0.659968	0.226	0.132	1	r1 r2 & r4	grasp
cep55l	0.00159321	0.562366	0.113	0.049	1	r1 r2 & r4	cep55l
zgc:174888	0.00160135	0.538235	0.256	0.152	1	r1 r2 & r4	zgc:174888
nfat5a	0.00160385	0.531947	0.286	0.177	1	r1 r2 & r4	nfat5a
si:dkey-77f5.8	0.00162567	0.594912	0.383	0.27	1	r1 r2 & r4	si:dkey-77f5.8
si:ch211-153a8.4	0.00162722	0.448448	0.444	0.314	1	r1 r2 & r4	si:ch211-153a8.4
crema	0.00162804	0.487429	0.436	0.313	1	r1 r2 & r4	crema
hmgb2a	0.00162979	0.348932	0.729	0.6	1	r1 r2 & r4	hmgb2a
kif18a	0.00166869	0.485419	0.361	0.24	1	r1 r2 & r4	kif18a
alms1	0.00166961	0.540331	0.376	0.261	1	r1 r2 & r4	alms1
efcab11	0.00167405	0.46556	0.511	0.382	1	r1 r2 & r4	efcab11
crb1	0.00167441	0.482938	0.346	0.225	1	r1 r2 & r4	crb1
ehd3	0.00167944	0.63163	0.158	0.08	1	r1 r2 & r4	ehd3
mylk2	0.00169731	0.460912	0.459	0.324	1	r1 r2 & r4	mylk2
mier1a	0.00171671	0.51271	0.286	0.178	1	r1 r2 & r4	mier1a
anp32a	0.00171824	0.396134	0.564	0.419	1	r1 r2 & r4	anp32a
znf367	0.00173378	0.539748	0.226	0.128	1	r1 r2 & r4	znf367
bub3	0.0017454	0.546002	0.18	0.095	1	r1 r2 & r4	bub3
mdka	0.00174564	0.28546	0.632	0.479	1	r1 r2 & r4	mdka
chd4b	0.00178029	0.276078	0.872	0.776	1	r1 r2 & r4	chd4b
ephb4a	0.00180196	0.506009	0.602	0.482	1	r1 r2 & r4	ephb4a
zgc:110540	0.0018474	0.570864	0.18	0.096	1	r1 r2 & r4	zgc:110540
ect2	0.0018727	0.423651	0.406	0.278	1	r1 r2 & r4	ect2
bicc2	0.00189262	0.667509	0.15	0.075	1	r1 r2 & r4	bicc2
kifc1	0.00190409	0.585598	0.301	0.195	1	r1 r2 & r4	kifc1
osbpl6	0.00190412	0.682113	0.113	0.05	1	r1 r2 & r4	osbpl6
dnajb2	0.00190912	0.336493	0.526	0.372	1	r1 r2 & r4	dnajb2
dtna	0.00191137	0.549765	0.113	0.05	1	r1 r2 & r4	dtna
rassf8b	0.00195096	0.474968	0.346	0.228	1	r1 r2 & r4	rassf8b
stk35	0.00197776	0.852786	0.128	0.06	1	r1 r2 & r4	stk35
pax3b	0.00202147	0.691293	0.113	0.05	1	r1 r2 & r4	pax3b
esco2	0.0020529	0.647963	0.218	0.126	1	r1 r2 & r4	esco2
nf1a	0.0020532	0.40666	0.602	0.48	1	r1 r2 & r4	nf1a
ppp2r5a	0.00205943	0.598778	0.301	0.196	1	r1 r2 & r4	ppp2r5a
rictorb	0.0020618	0.432321	0.15	0.074	1	r1 r2 & r4	rictorb
tia1l	0.00207274	0.458372	0.436	0.313	1	r1 r2 & r4	tia1l
BX324003.2	0.0020842	0.469378	0.113	0.05	1	r1 r2 & r4	BX324003.2
klhl24a	0.00208548	0.662254	0.301	0.196	1	r1 r2 & r4	klhl24a
ttll7	0.00208551	0.38245	0.353	0.228	1	r1 r2 & r4	ttll7
odf2a	0.00213089	0.452858	0.113	0.05	1	r1 r2 & r4	odf2a
tpbga	0.00213224	0.447743	0.143	0.069	1	r1 r2 & r4	tpbga
zc3h18	0.0021373	0.421877	0.519	0.394	1	r1 r2 & r4	zc3h18
pclaf	0.00215193	0.558052	0.316	0.205	1	r1 r2 & r4	pclaf
foxm1	0.00219137	0.616482	0.211	0.12	1	r1 r2 & r4	foxm1
fcho1	0.0022185	0.444928	0.398	0.272	1	r1 r2 & r4	fcho1
prpf40a	0.00223615	0.58829	0.436	0.326	1	r1 r2 & r4	prpf40a
tgfbr2b	0.00228946	0.845785	0.18	0.097	1	r1 r2 & r4	tgfbr2b
zc3h12b	0.00229514	0.689795	0.143	0.072	1	r1 r2 & r4	zc3h12b
kcnab2a	0.00229754	0.544059	0.271	0.168	1	r1 r2 & r4	kcnab2a
znf1130	0.00230076	0.515046	0.233	0.137	1	r1 r2 & r4	znf1130
setdb1b	0.00230155	0.591308	0.323	0.219	1	r1 r2 & r4	setdb1b
b3glcta	0.00231279	0.723236	0.226	0.136	1	r1 r2 & r4	b3glcta
acaca	0.00231929	0.541885	0.113	0.05	1	r1 r2 & r4	acaca
znf831	0.00232033	0.502995	0.105	0.045	1	r1 r2 & r4	znf831
casp3b	0.00235583	0.473949	0.105	0.045	1	r1 r2 & r4	casp3b
arhgef18b	0.00237353	0.502247	0.361	0.238	1	r1 r2 & r4	arhgef18b
zfat	0.00243016	0.453561	0.233	0.136	1	r1 r2 & r4	zfat
nr2f1b	0.00243714	0.831862	0.12	0.057	1	r1 r2 & r4	nr2f1b
acsl3b	0.00245878	0.50585	0.226	0.131	1	r1 r2 & r4	acsl3b
epn3a	0.00247197	0.504093	0.353	0.242	1	r1 r2 & r4	epn3a
gtpbp6	0.0024903	0.570596	0.143	0.071	1	r1 r2 & r4	gtpbp6
zeb1a	0.00249191	0.575891	0.361	0.255	1	r1 r2 & r4	zeb1a
diaph3	0.00253095	0.279184	0.579	0.438	1	r1 r2 & r4	diaph3
CU862020.1	0.00254337	0.55948	0.158	0.081	1	r1 r2 & r4	CU862020.1
phip	0.00256144	0.381821	0.677	0.582	1	r1 r2 & r4	phip
si:ch211-155k24.9	0.00260467	0.291018	0.489	0.35	1	r1 r2 & r4	si:ch211-155k24.9
pds5b	0.00263955	0.3087	0.519	0.363	1	r1 r2 & r4	pds5b
nuf2	0.0026463	0.514336	0.188	0.103	1	r1 r2 & r4	nuf2
si:ch211-108d22.2	0.00265515	0.376414	0.571	0.451	1	r1 r2 & r4	si:ch211-108d22.2
TANC2	0.00273161	0.373838	0.105	0.045	1	r1 r2 & r4	TANC2
med27	0.0027333	0.425623	0.496	0.36	1	r1 r2 & r4	med27
rfc3	0.0027335	0.608495	0.158	0.081	1	r1 r2 & r4	rfc3
fam102aa	0.00276029	0.468504	0.338	0.232	1	r1 r2 & r4	fam102aa
hltf	0.00280328	0.357194	0.248	0.146	1	r1 r2 & r4	hltf
zgc:110796	0.00282914	0.377176	0.436	0.307	1	r1 r2 & r4	zgc:110796
man2a2	0.00286038	0.409466	0.504	0.378	1	r1 r2 & r4	man2a2
FAM72B	0.00289373	0.647705	0.18	0.1	1	r1 r2 & r4	FAM72B
tada3l	0.00289567	0.516467	0.15	0.077	1	r1 r2 & r4	tada3l
sardh	0.00290137	0.620407	0.271	0.174	1	r1 r2 & r4	sardh
ipo11	0.00291516	0.35755	0.647	0.532	1	r1 r2 & r4	ipo11
sp8b	0.00293829	0.601483	0.158	0.083	1	r1 r2 & r4	sp8b
lancl1	0.00293934	0.763572	0.113	0.052	1	r1 r2 & r4	lancl1
nck2a	0.00296062	0.370175	0.481	0.343	1	r1 r2 & r4	nck2a
mark3b	0.00300372	0.449333	0.376	0.255	1	r1 r2 & r4	mark3b
pou3f2a	0.00301036	0.513548	0.113	0.051	1	r1 r2 & r4	pou3f2a
slc25a42	0.00301125	0.59391	0.188	0.106	1	r1 r2 & r4	slc25a42
si:zfos-943e10.1	0.00304439	0.43539	0.195	0.109	1	r1 r2 & r4	si:zfos-943e10.1
nsd1b	0.00307723	0.660788	0.105	0.047	1	r1 r2 & r4	nsd1b
nck2b	0.00310056	0.386687	0.647	0.537	1	r1 r2 & r4	nck2b
gpc1a	0.0031066	0.351239	0.226	0.129	1	r1 r2 & r4	gpc1a
chtf8	0.00312956	0.562366	0.113	0.052	1	r1 r2 & r4	chtf8
ubr3	0.00313447	0.48304	0.451	0.33	1	r1 r2 & r4	ubr3
hcfc1a	0.00315054	0.438413	0.451	0.329	1	r1 r2 & r4	hcfc1a
nipblb	0.00320546	0.40749	0.489	0.38	1	r1 r2 & r4	nipblb
si:ch211-126j24.1	0.00326693	0.57073	0.241	0.149	1	r1 r2 & r4	si:ch211-126j24.1
si:dkey-19e4.5	0.00335943	0.558752	0.233	0.142	1	r1 r2 & r4	si:dkey-19e4.5
tcea1	0.00337142	0.462395	0.301	0.194	1	r1 r2 & r4	tcea1
nasp	0.00337995	0.321225	0.406	0.274	1	r1 r2 & r4	nasp
nfyba	0.00339384	0.456553	0.451	0.331	1	r1 r2 & r4	nfyba
si:dkey-35m8.1	0.00339511	0.860391	0.218	0.13	1	r1 r2 & r4	si:dkey-35m8.1
umad1	0.00339896	0.536118	0.211	0.123	1	r1 r2 & r4	umad1
cenpf	0.0034363	0.379933	0.436	0.306	1	r1 r2 & r4	cenpf
bckdk	0.00343789	0.415235	0.263	0.16	1	r1 r2 & r4	bckdk
zdhhc16b	0.00347156	0.42799	0.128	0.061	1	r1 r2 & r4	zdhhc16b
osbpl3b	0.00347884	0.637848	0.368	0.267	1	r1 r2 & r4	osbpl3b
mcm2	0.0034829	0.452874	0.368	0.255	1	r1 r2 & r4	mcm2
creb1b	0.00349416	0.424556	0.361	0.244	1	r1 r2 & r4	creb1b
ccnt1	0.00350785	0.482187	0.361	0.251	1	r1 r2 & r4	ccnt1
fancb	0.00356443	0.452252	0.143	0.072	1	r1 r2 & r4	fancb
si:dkey-271j15.3	0.00356863	0.458344	0.113	0.052	1	r1 r2 & r4	si:dkey-271j15.3
papolg	0.00361861	0.46993	0.436	0.325	1	r1 r2 & r4	papolg
znf1153.1	0.00362416	0.525414	0.444	0.332	1	r1 r2 & r4	znf1153.1
nol11	0.00363027	0.51244	0.414	0.296	1	r1 r2 & r4	nol11
aaas	0.00363895	0.631449	0.105	0.048	1	r1 r2 & r4	aaas
agbl2	0.00364802	0.53479	0.195	0.112	1	r1 r2 & r4	agbl2
cbx3b	0.00365352	0.478235	0.135	0.067	1	r1 r2 & r4	cbx3b
crybg1a	0.0036608	0.297202	0.564	0.419	1	r1 r2 & r4	crybg1a
dennd2da	0.00367883	0.428605	0.263	0.162	1	r1 r2 & r4	dennd2da
ccdc102a	0.00368869	0.465701	0.338	0.224	1	r1 r2 & r4	ccdc102a
si:ch211-207i1.2	0.00369313	0.544474	0.293	0.194	1	r1 r2 & r4	si:ch211-207i1.2
proser3	0.0037359	0.428596	0.105	0.047	1	r1 r2 & r4	proser3
nucks1b	0.00377159	0.57132	0.361	0.251	1	r1 r2 & r4	nucks1b
igdcc4	0.0037751	0.29736	0.398	0.273	1	r1 r2 & r4	igdcc4
si:ch211-66k16.27	0.00381662	0.532126	0.286	0.186	1	r1 r2 & r4	si:ch211-66k16.27
sh2d4ba	0.00384895	0.551882	0.188	0.107	1	r1 r2 & r4	sh2d4ba
pbx3b	0.00387029	0.414031	0.301	0.196	1	r1 r2 & r4	pbx3b
aspm	0.00388555	0.449371	0.534	0.419	1	r1 r2 & r4	aspm
orc3	0.00392003	0.400813	0.436	0.32	1	r1 r2 & r4	orc3
brca2	0.00395578	0.471815	0.286	0.185	1	r1 r2 & r4	brca2
zgc:162698	0.00397523	0.385162	0.188	0.104	1	r1 r2 & r4	zgc:162698
kpnb3	0.00400446	0.456053	0.391	0.28	1	r1 r2 & r4	kpnb3
tax1bp3	0.00403199	0.407789	0.15	0.078	1	r1 r2 & r4	tax1bp3
bcl2l16	0.0040402	0.426378	0.241	0.146	1	r1 r2 & r4	bcl2l16
spock1	0.00410286	0.640009	0.218	0.132	1	r1 r2 & r4	spock1
cep192	0.00411662	0.488969	0.466	0.36	1	r1 r2 & r4	cep192
spred2a	0.00416365	0.321221	0.383	0.261	1	r1 r2 & r4	spred2a
usp54a	0.00418694	0.412153	0.429	0.319	1	r1 r2 & r4	usp54a
ncoa6	0.00423497	0.461636	0.241	0.147	1	r1 r2 & r4	ncoa6
rhot2	0.00425414	0.481897	0.12	0.058	1	r1 r2 & r4	rhot2
rnf8	0.00433344	0.427506	0.278	0.176	1	r1 r2 & r4	rnf8
si:dkey-117n7.5	0.00436048	0.427741	0.128	0.063	1	r1 r2 & r4	si:dkey-117n7.5
katnb1	0.00440879	0.486864	0.331	0.221	1	r1 r2 & r4	katnb1
shprh	0.00440973	0.513457	0.271	0.175	1	r1 r2 & r4	shprh
cdk1	0.0044498	0.573145	0.271	0.171	1	r1 r2 & r4	cdk1
tax1bp1b	0.00448151	0.270124	0.707	0.594	1	r1 r2 & r4	tax1bp1b
mms22l	0.00451107	0.478235	0.128	0.063	1	r1 r2 & r4	mms22l
bmb	0.00452016	0.498518	0.165	0.09	1	r1 r2 & r4	bmb
arhgef7a	0.00461853	0.542144	0.248	0.157	1	r1 r2 & r4	arhgef7a
tom1	0.00463505	0.540465	0.105	0.048	1	r1 r2 & r4	tom1
fen1	0.00474368	0.480769	0.218	0.132	1	r1 r2 & r4	fen1
ago1	0.00475012	0.387463	0.586	0.478	1	r1 r2 & r4	ago1
csrp2	0.00476472	0.461805	0.308	0.205	1	r1 r2 & r4	csrp2
dnmt3aa	0.00476922	0.420606	0.12	0.058	1	r1 r2 & r4	dnmt3aa
nxt2	0.00479823	0.476689	0.12	0.058	1	r1 r2 & r4	nxt2
prpf31	0.00491172	0.525671	0.143	0.074	1	r1 r2 & r4	prpf31
amd1	0.00492849	0.407824	0.459	0.337	1	r1 r2 & r4	amd1
rc3h1a	0.00499597	0.46989	0.368	0.264	1	r1 r2 & r4	rc3h1a
nt5dc2	0.00499786	0.289944	0.474	0.351	1	r1 r2 & r4	nt5dc2
ankrd28b	0.00503193	0.276661	0.594	0.464	1	r1 r2 & r4	ankrd28b
SRBD1	0.00503507	0.360909	0.444	0.317	1	r1 r2 & r4	SRBD1
celf3a	0.00507027	0.471118	0.414	0.31	1	r1 r2 & r4	celf3a
chaf1b	0.00513396	0.576135	0.158	0.087	1	r1 r2 & r4	chaf1b
def8	0.00518023	0.610517	0.406	0.311	1	r1 r2 & r4	def8
mad1l1	0.00518331	0.522751	0.383	0.276	1	r1 r2 & r4	mad1l1
pcyox1	0.00519734	0.446149	0.135	0.069	1	r1 r2 & r4	pcyox1
maptb	0.00522297	0.341515	0.474	0.35	1	r1 r2 & r4	maptb
ucp2	0.00525851	0.422931	0.421	0.306	1	r1 r2 & r4	ucp2
ptbp2b	0.00527234	0.451685	0.308	0.205	1	r1 r2 & r4	ptbp2b
pms2	0.0052771	0.322323	0.241	0.145	1	r1 r2 & r4	pms2
mzt2b	0.00534415	0.476689	0.12	0.059	1	r1 r2 & r4	mzt2b
elmo1	0.00536668	0.469052	0.376	0.274	1	r1 r2 & r4	elmo1
kif14	0.00538512	0.495206	0.361	0.253	1	r1 r2 & r4	kif14
rabl6b	0.00557574	0.771724	0.105	0.051	1	r1 r2 & r4	rabl6b
rngtt	0.00560592	0.443914	0.511	0.398	1	r1 r2 & r4	rngtt
ywhaqb	0.00561166	0.31681	0.699	0.575	1	r1 r2 & r4	ywhaqb
setdb1a	0.0056235	0.36163	0.429	0.304	1	r1 r2 & r4	setdb1a
prps1b	0.00567592	0.251009	0.639	0.47	1	r1 r2 & r4	prps1b
sox21a	0.00568592	0.520529	0.128	0.065	1	r1 r2 & r4	sox21a
katnal1	0.00574349	0.378173	0.113	0.054	1	r1 r2 & r4	katnal1
cmtr1	0.00578653	0.575133	0.218	0.135	1	r1 r2 & r4	cmtr1
lrp4	0.00580335	0.586386	0.188	0.112	1	r1 r2 & r4	lrp4
ctdspl2a	0.00586458	0.354926	0.338	0.225	1	r1 r2 & r4	ctdspl2a
igf2bp3	0.00588567	0.367886	0.82	0.733	1	r1 r2 & r4	igf2bp3
smarcad1a	0.0058938	0.448086	0.195	0.114	1	r1 r2 & r4	smarcad1a
si:ch73-366l1.5	0.00597028	0.366082	0.135	0.069	1	r1 r2 & r4	si:ch73-366l1.5
ogfod1	0.00597139	0.445828	0.113	0.054	1	r1 r2 & r4	ogfod1
h2az2b	0.00605512	0.328692	0.639	0.52	1	r1 r2 & r4	h2az2b
itga6a	0.006064	0.357164	0.308	0.201	1	r1 r2 & r4	itga6a
lsm3	0.00607882	0.420459	0.248	0.154	1	r1 r2 & r4	lsm3
morf4l1	0.00609507	0.539976	0.316	0.221	1	r1 r2 & r4	morf4l1
agpat4	0.00615228	0.691	0.165	0.094	1	r1 r2 & r4	agpat4
tox2	0.00616802	0.494573	0.414	0.31	1	r1 r2 & r4	tox2
scarb2a	0.00619077	0.355617	0.632	0.506	1	r1 r2 & r4	scarb2a
polk	0.00622396	0.419423	0.18	0.102	1	r1 r2 & r4	polk
polr1d	0.00625026	0.54371	0.226	0.142	1	r1 r2 & r4	polr1d
scap	0.00631827	0.449249	0.143	0.076	1	r1 r2 & r4	scap
CU459186.2	0.00632724	0.424741	0.263	0.169	1	r1 r2 & r4	CU459186.2
usp54b	0.00633412	0.539251	0.165	0.093	1	r1 r2 & r4	usp54b
ehmt1b	0.00637406	0.485045	0.459	0.349	1	r1 r2 & r4	ehmt1b
ZNF821	0.00638635	0.449316	0.286	0.188	1	r1 r2 & r4	ZNF821
ran	0.00643481	0.356362	0.519	0.398	1	r1 r2 & r4	ran
rab18a	0.00653824	0.451382	0.226	0.139	1	r1 r2 & r4	rab18a
ptprsa.1	0.00665155	0.26332	0.805	0.725	1	r1 r2 & r4	ptprsa.1
plce1	0.00665767	0.457909	0.316	0.217	1	r1 r2 & r4	plce1
si:dkey-111k8.2	0.00673345	0.520026	0.15	0.081	1	r1 r2 & r4	si:dkey-111k8.2
axin2	0.00676885	0.491813	0.331	0.234	1	r1 r2 & r4	axin2
zgc:163040	0.00678795	0.456042	0.12	0.06	1	r1 r2 & r4	zgc:163040
pms1	0.00686894	0.422325	0.278	0.182	1	r1 r2 & r4	pms1
dipk2b	0.00690956	0.417911	0.113	0.055	1	r1 r2 & r4	dipk2b
nes	0.00692148	0.3701	0.113	0.054	1	r1 r2 & r4	nes
CR293507.1	0.00693538	0.491035	0.18	0.105	1	r1 r2 & r4	CR293507.1
brd3b	0.00697527	0.310992	0.647	0.499	1	r1 r2 & r4	brd3b
puf60b	0.00698845	0.407327	0.316	0.212	1	r1 r2 & r4	puf60b
zgc:73226	0.00701335	0.519979	0.173	0.1	1	r1 r2 & r4	zgc:73226
peli1b	0.00704422	0.418208	0.459	0.343	1	r1 r2 & r4	peli1b
ZNF423	0.00717002	0.437085	0.511	0.399	1	r1 r2 & r4	ZNF423
gart	0.00718852	0.401084	0.226	0.139	1	r1 r2 & r4	gart
arhgef12b	0.0072158	0.360827	0.744	0.68	1	r1 r2 & r4	arhgef12b
tfcp2	0.00721927	0.533141	0.15	0.083	1	r1 r2 & r4	tfcp2
trip13	0.00722698	0.477789	0.165	0.093	1	r1 r2 & r4	trip13
DOCK4	0.00723743	0.429222	0.15	0.081	1	r1 r2 & r4	DOCK4
tnrc6c1	0.00723774	0.337838	0.594	0.474	1	r1 r2 & r4	tnrc6c1
dscc1	0.00732008	0.518203	0.218	0.136	1	r1 r2 & r4	dscc1
hs6st1b	0.0073377	0.378705	0.323	0.222	1	r1 r2 & r4	hs6st1b
si:dkey-222b8.1.1	0.00737662	0.477464	0.18	0.105	1	r1 r2 & r4	si:dkey-222b8.1.1
bcr	0.00738465	0.483126	0.263	0.169	1	r1 r2 & r4	bcr
pask	0.00739468	0.562676	0.188	0.112	1	r1 r2 & r4	pask
sec22c	0.00740774	0.436526	0.113	0.055	1	r1 r2 & r4	sec22c
dicer1	0.00745012	0.358792	0.466	0.337	1	r1 r2 & r4	dicer1
gdpd3a	0.00761956	0.550158	0.218	0.137	1	r1 r2 & r4	gdpd3a
wdr33	0.00768422	0.306394	0.617	0.5	1	r1 r2 & r4	wdr33
pcca	0.00769115	0.576332	0.459	0.371	1	r1 r2 & r4	pcca
rfc2	0.00771966	0.369007	0.226	0.139	1	r1 r2 & r4	rfc2
ccdc82	0.00772723	0.378564	0.263	0.169	1	r1 r2 & r4	ccdc82
znf185	0.00776368	0.447876	0.15	0.083	1	r1 r2 & r4	znf185
hspa4l	0.00779896	0.726962	0.18	0.106	1	r1 r2 & r4	hspa4l
mapkapk3	0.00787059	0.483685	0.128	0.067	1	r1 r2 & r4	mapkapk3
suv39h1b	0.00802464	0.498904	0.188	0.112	1	r1 r2 & r4	suv39h1b
mrtfaa	0.00806905	0.379188	0.135	0.071	1	r1 r2 & r4	mrtfaa
h3f3b.1	0.00812107	0.332733	0.436	0.322	1	r1 r2 & r4	h3f3b.1
b4galnt4a	0.00812147	0.575174	0.165	0.094	1	r1 r2 & r4	b4galnt4a
knstrn	0.00818521	0.43962	0.158	0.088	1	r1 r2 & r4	knstrn
sgo1	0.0082449	0.421412	0.18	0.105	1	r1 r2 & r4	sgo1
mical3a	0.00826144	0.372488	0.496	0.382	1	r1 r2 & r4	mical3a
immp2l	0.00826371	0.435398	0.308	0.21	1	r1 r2 & r4	immp2l
DST	0.00826413	0.307493	0.211	0.127	1	r1 r2 & r4	DST
trrap	0.0082664	0.263448	0.774	0.655	1	r1 r2 & r4	trrap
cenpi	0.00829585	0.45166	0.489	0.393	1	r1 r2 & r4	cenpi
hmgb3b	0.00834288	0.338736	0.135	0.071	1	r1 r2 & r4	hmgb3b
zgc:55733	0.00835115	0.386651	0.436	0.33	1	r1 r2 & r4	zgc:55733
si:dkey-92i17.2	0.00840227	0.555885	0.346	0.257	1	r1 r2 & r4	si:dkey-92i17.2
arhgap32b	0.00841111	0.508863	0.459	0.38	1	r1 r2 & r4	arhgap32b
zgc:113208	0.00842128	0.57003	0.293	0.203	1	r1 r2 & r4	zgc:113208
bora	0.0084404	0.471901	0.173	0.1	1	r1 r2 & r4	bora
sirt6	0.00847316	0.518534	0.331	0.235	1	r1 r2 & r4	sirt6
si:ch211-107m4.1	0.00856584	0.497005	0.256	0.169	1	r1 r2 & r4	si:ch211-107m4.1
ncapg	0.00857653	0.432612	0.271	0.179	1	r1 r2 & r4	ncapg
cdc14ab	0.0085903	0.300698	0.474	0.353	1	r1 r2 & r4	cdc14ab
pkd1a	0.00862551	0.430503	0.286	0.191	1	r1 r2 & r4	pkd1a
tns1b	0.00864381	0.29428	0.429	0.315	1	r1 r2 & r4	tns1b
clasp1a	0.0086703	0.457301	0.368	0.27	1	r1 r2 & r4	clasp1a
nlk2	0.00868808	0.478397	0.15	0.083	1	r1 r2 & r4	nlk2
mxd3	0.00870371	0.473525	0.323	0.225	1	r1 r2 & r4	mxd3
tardbp	0.00874527	0.368513	0.444	0.34	1	r1 r2 & r4	tardbp
cad	0.00875632	0.328732	0.549	0.434	1	r1 r2 & r4	cad
tk1	0.00877553	0.485339	0.203	0.124	1	r1 r2 & r4	tk1
si:dkey-31c13.1	0.00879919	0.43389	0.195	0.117	1	r1 r2 & r4	si:dkey-31c13.1
qars1	0.00885028	0.447393	0.105	0.051	1	r1 r2 & r4	qars1
rtn4a	0.00890157	0.527089	0.496	0.406	1	r1 r2 & r4	rtn4a
ranbp1	0.00891806	0.512686	0.323	0.231	1	r1 r2 & r4	ranbp1
kif7	0.008962	0.395555	0.203	0.123	1	r1 r2 & r4	kif7
znf1102.1	0.00898353	0.513548	0.105	0.052	1	r1 r2 & r4	znf1102.1
vma21	0.0090586	0.392331	0.12	0.061	1	r1 r2 & r4	vma21
mapre3a	0.00914522	0.699838	0.105	0.053	1	r1 r2 & r4	mapre3a
uspl1	0.00915303	0.51366	0.241	0.156	1	r1 r2 & r4	uspl1
ercc6	0.00916493	0.454739	0.331	0.236	1	r1 r2 & r4	ercc6
arglu1a	0.00918472	0.374487	0.474	0.359	1	r1 r2 & r4	arglu1a
stimate	0.00921715	0.421633	0.195	0.117	1	r1 r2 & r4	stimate
ncapg2	0.00923797	0.463516	0.15	0.084	1	r1 r2 & r4	ncapg2
hist1h4l.16	0.00924419	0.347659	0.451	0.337	1	r1 r2 & r4	hist1h4l.16
rab30	0.00941785	0.47937	0.301	0.209	1	r1 r2 & r4	rab30
znf318	0.00947704	0.282609	0.376	0.264	1	r1 r2 & r4	znf318
si:ch211-113a14.11	0.00951976	0.50585	0.203	0.123	1	r1 r2 & r4	si:ch211-113a14.11
vbp1	0.00961069	0.408688	0.218	0.136	1	r1 r2 & r4	vbp1
kctd17	0.00963243	0.26466	0.398	0.279	1	r1 r2 & r4	kctd17
ccnh	0.00970687	0.372206	0.271	0.178	1	r1 r2 & r4	ccnh
thap12b	0.00976611	0.502586	0.188	0.114	1	r1 r2 & r4	thap12b
znf1115.1	0.00976953	0.468104	0.18	0.107	1	r1 r2 & r4	znf1115.1
stil	0.00977778	0.374554	0.173	0.1	1	r1 r2 & r4	stil
atad5b	0.00979125	0.401502	0.278	0.186	1	r1 r2 & r4	atad5b
ppt2	0.00979302	0.416973	0.218	0.136	1	r1 r2 & r4	ppt2
arhgef18a	0.00981378	0.314445	0.241	0.152	1	r1 r2 & r4	arhgef18a
cicb	0.00983656	0.420875	0.421	0.323	1	r1 r2 & r4	cicb
stra6	3.48446e-79	3.41212	0.651	0.078	7.08461e-75	FB & MB	stra6
kif5c	1.00326e-39	2.41727	0.396	0.054	2.03984e-35	FB & MB	kif5c
sall3b	7.58249e-35	2.30598	0.434	0.078	1.54167e-30	FB & MB	sall3b
afap1l2	8.02545e-35	2.46249	0.425	0.074	1.63173e-30	FB & MB	afap1l2
dmbx1b	1.10381e-32	1.50384	0.189	0.012	2.24426e-28	FB & MB	dmbx1b
otx2b	1.28565e-28	1.62146	0.236	0.025	2.61399e-24	FB & MB	otx2b
syne1b	9.86412e-28	2.05731	0.509	0.132	2.00557e-23	FB & MB	syne1b
ptprnb1	2.16745e-27	1.67088	0.717	0.253	4.40687e-23	FB & MB	ptprnb
crb11	1.63802e-26	1.80234	0.632	0.21	3.33042e-22	FB & MB	crb1
ush1c	5.46617e-26	1.6142	0.264	0.036	1.11138e-21	FB & MB	ush1c
lmo3	1.4584e-25	1.98612	0.264	0.037	2.96521e-21	FB & MB	lmo3
ncam1a1	4.98136e-25	1.35031	0.943	0.506	1.01281e-20	FB & MB	ncam1a
sulf2a	5.12126e-25	2.01837	0.321	0.057	1.04126e-20	FB & MB	sulf2a
mab21l1	1.85352e-24	1.42447	0.123	0.006	3.76858e-20	FB & MB	mab21l1
ek11	2.17459e-24	1.47025	0.5	0.132	4.42137e-20	FB & MB	ek1
zbtb16b1	3.91182e-23	1.32661	0.906	0.54	7.95352e-19	FB & MB	zbtb16b
igf2b1	4.66331e-23	1.51817	0.613	0.211	9.48145e-19	FB & MB	igf2b
dock3	4.64005e-22	2.26188	0.434	0.124	9.43415e-18	FB & MB	dock3
lrp2a1	1.68582e-21	1.32601	0.821	0.435	3.4276e-17	FB & MB	lrp2a
tmem471	1.73398e-21	1.59985	0.528	0.172	3.52553e-17	FB & MB	tmem47
mbd3b1	2.25615e-21	1.2904	0.83	0.42	4.58721e-17	FB & MB	mbd3b
ndst2b	3.55254e-21	1.99281	0.566	0.211	7.22303e-17	FB & MB	ndst2b
pou3f3b1	6.17585e-21	1.57946	0.519	0.165	1.25567e-16	FB & MB	pou3f3b
ntn1a	7.2276e-21	1.61061	0.726	0.326	1.46952e-16	FB & MB	ntn1a
pdgfbb	2.34074e-20	1.49571	0.406	0.103	4.7592e-16	FB & MB	pdgfbb
fgfbp3	1.09902e-19	1.43936	0.217	0.033	2.23452e-15	FB & MB	fgfbp3
fgfr21	3.82967e-19	0.948132	0.981	0.782	7.78648e-15	FB & MB	fgfr2
tcf7l1b	5.45034e-19	1.4959	0.708	0.344	1.10816e-14	FB & MB	tcf7l1b
nova21	6.05577e-19	0.956888	1	0.724	1.23126e-14	FB & MB	nova2
nrarpb1	1.9498e-18	1.35942	0.642	0.272	3.96434e-14	FB & MB	nrarpb
otx1	2.04178e-17	1.52636	0.292	0.066	4.15135e-13	FB & MB	otx1
fam167ab1	3.5152e-17	1.32478	0.453	0.145	7.1471e-13	FB & MB	fam167ab
ptprn21	4.30359e-17	1.40161	0.698	0.329	8.75005e-13	FB & MB	ptprn2
msi11	1.20801e-16	1.12862	0.849	0.484	2.45613e-12	FB & MB	msi1
fgfr3	1.22271e-16	1.46769	0.717	0.39	2.48601e-12	FB & MB	fgfr3
ptch2	1.86045e-16	1.36914	0.566	0.224	3.78267e-12	FB & MB	ptch2
celsr1b1	3.8951e-16	1.27384	0.726	0.373	7.91952e-12	FB & MB	celsr1b
pou3f3a1	5.36163e-16	1.35791	0.434	0.142	1.09013e-11	FB & MB	pou3f3a
adgrv11	7.94508e-16	1.07954	0.887	0.541	1.61539e-11	FB & MB	adgrv1
plp1a1	1.04494e-15	1.25222	0.623	0.27	2.12458e-11	FB & MB	plp1a
SIPA1	1.21522e-15	1.36987	0.377	0.111	2.47079e-11	FB & MB	SIPA1
epha4b1	2.97985e-15	1.14789	0.689	0.328	6.05864e-11	FB & MB	epha4b
chl1a	3.38924e-15	0.929144	0.5	0.177	6.89099e-11	FB & MB	chl1a
blmh1	4.13633e-15	0.803638	0.934	0.587	8.40998e-11	FB & MB	blmh
crb2a1	7.19567e-15	0.984162	0.792	0.429	1.46302e-10	FB & MB	crb2a
mpp5a	7.87353e-15	1.18343	0.774	0.454	1.60085e-10	FB & MB	mpp5a
efna2a1	1.17177e-14	1.20775	0.764	0.444	2.38244e-10	FB & MB	efna2a
vwa7	4.93003e-14	1.23207	0.189	0.035	1.00237e-09	FB & MB	vwa7
znf536	7.37293e-14	1.80521	0.292	0.08	1.49906e-09	FB & MB	znf536
dmbx1a	3.08861e-13	1.28389	0.189	0.037	6.27975e-09	FB & MB	dmbx1a
si:ch211-214c7.41	5.0506e-13	1.25301	0.528	0.24	1.02689e-08	FB & MB	si:ch211-214c7.4
cldn5a1	9.83937e-13	0.913117	0.755	0.42	2.00054e-08	FB & MB	cldn5a
plch11	2.10582e-12	0.852693	0.792	0.464	4.28156e-08	FB & MB	plch1
rfx41	2.98603e-12	0.923665	0.802	0.445	6.0712e-08	FB & MB	rfx4
rbp5	5.85416e-12	1.37121	0.33	0.109	1.19027e-07	FB & MB	rbp5
zbtb16a1	7.68809e-12	0.629153	1	0.842	1.56314e-07	FB & MB	zbtb16a
plxna1a	1.02898e-11	1.13877	0.726	0.505	2.09213e-07	FB & MB	plxna1a
phgdh	1.20338e-11	1.29514	0.472	0.21	2.44672e-07	FB & MB	phgdh
amot	1.30319e-11	0.844205	0.84	0.52	2.64965e-07	FB & MB	amot
foxp4	1.38078e-11	0.756457	0.943	0.738	2.8074e-07	FB & MB	foxp4
arhgap21a1	1.53862e-11	1.08656	0.509	0.225	3.12832e-07	FB & MB	arhgap21a
arhgef10lb1	1.93586e-11	1.00046	0.547	0.248	3.936e-07	FB & MB	arhgef10lb
rhbdl3	2.02178e-11	1.05103	0.283	0.084	4.11069e-07	FB & MB	rhbdl3
tet31	2.22811e-11	0.917682	0.849	0.576	4.5302e-07	FB & MB	tet3
pvrl2l1	2.30907e-11	0.763036	0.849	0.535	4.69479e-07	FB & MB	pvrl2l
cadm1a1	5.30317e-11	0.713768	0.802	0.472	1.07824e-06	FB & MB	cadm1a
skia1	9.06983e-11	0.869095	0.811	0.583	1.84408e-06	FB & MB	skia
rfx21	1.08229e-10	0.778999	0.877	0.593	2.20052e-06	FB & MB	rfx2
znrf3	1.14157e-10	0.772291	0.868	0.705	2.32105e-06	FB & MB	znrf3
podxl1	1.33098e-10	1.03671	0.453	0.198	2.70616e-06	FB & MB	podxl
fam102aa1	1.53063e-10	1.04248	0.491	0.224	3.11207e-06	FB & MB	fam102aa
tet21	1.72156e-10	0.821527	0.783	0.484	3.50028e-06	FB & MB	tet2
cxadr1	2.83439e-10	0.7978	0.802	0.491	5.76287e-06	FB & MB	cxadr
iffo2a	2.92644e-10	1.22075	0.425	0.181	5.95003e-06	FB & MB	iffo2a
brsk2b1	2.94996e-10	0.746198	0.491	0.214	5.99785e-06	FB & MB	brsk2b
nrxn3a1	4.34213e-10	1.35276	0.33	0.122	8.82841e-06	FB & MB	nrxn3a
ptpn13	4.89158e-10	0.739852	0.792	0.535	9.94555e-06	FB & MB	ptpn13
mex3b1	5.00843e-10	0.889047	0.651	0.362	1.01831e-05	FB & MB	mex3b
pvalb6	5.273e-10	1.0613	0.226	0.064	1.07211e-05	FB & MB	pvalb6
sox11a1	5.91271e-10	0.858853	0.821	0.555	1.20217e-05	FB & MB	sox11a
dhx32b	7.06653e-10	1.46935	0.226	0.065	1.43677e-05	FB & MB	dhx32b
rims2a	2.06087e-09	1.35668	0.16	0.038	4.19017e-05	FB & MB	rims2a
fat3a1	2.83483e-09	0.740286	0.811	0.526	5.76378e-05	FB & MB	fat3a
epb41a1	3.39705e-09	0.889235	0.679	0.406	6.90688e-05	FB & MB	epb41a
lamb21	3.73885e-09	0.988132	0.472	0.226	7.60184e-05	FB & MB	lamb2
si:ch73-364h19.11	4.74678e-09	0.925907	0.462	0.215	9.65116e-05	FB & MB	si:ch73-364h19.1
sox19a1	4.7765e-09	1.04824	0.292	0.106	9.71158e-05	FB & MB	sox19a
ssbp41	4.85183e-09	0.828817	0.764	0.53	9.86475e-05	FB & MB	ssbp4
tox1	7.87337e-09	0.83727	0.689	0.435	0.000160081	FB & MB	tox
lamb2l1	8.27152e-09	0.811905	0.5	0.236	0.000168177	FB & MB	lamb2l
ptch1	8.6622e-09	1.06612	0.613	0.386	0.00017612	FB & MB	ptch1
rassf7a	9.59808e-09	0.602235	0.632	0.336	0.000195148	FB & MB	rassf7a
pou3f2a1	1.00173e-08	1.03056	0.179	0.048	0.000203671	FB & MB	pou3f2a
mab21l2	1.19763e-08	1.07532	0.113	0.021	0.000243502	FB & MB	mab21l2
arvcfb1	1.71943e-08	0.715319	0.726	0.493	0.000349595	FB & MB	arvcfb
sb:cb811	1.798e-08	0.873544	0.632	0.375	0.000365569	FB & MB	sb:cb81
BX284638.21	1.83951e-08	0.870617	0.651	0.38	0.000374008	FB & MB	BX284638.2
nfasca	1.86659e-08	0.69499	0.368	0.149	0.000379515	FB & MB	nfasca
ephb3a1	1.91449e-08	0.973121	0.434	0.207	0.000389254	FB & MB	ephb3a
sema5ba1	2.12245e-08	0.864731	0.604	0.332	0.000431537	FB & MB	sema5ba
dag11	2.73265e-08	0.532769	0.962	0.796	0.000555602	FB & MB	dag1
nr2e1	3.12838e-08	0.857289	0.179	0.049	0.000636063	FB & MB	nr2e1
gphna	3.17657e-08	1.01866	0.387	0.177	0.00064586	FB & MB	gphna
shha	3.30082e-08	0.966557	0.151	0.037	0.000671123	FB & MB	shha
efcc1	3.38327e-08	1.16049	0.226	0.075	0.000687886	FB & MB	efcc1
hmga2	3.40221e-08	1.1121	0.481	0.249	0.000691737	FB & MB	hmga2
pou3f2b1	3.54733e-08	1.1594	0.34	0.146	0.000721242	FB & MB	pou3f2b
BX005328.1	4.08329e-08	0.877006	0.292	0.11	0.000830214	FB & MB	BX005328.1
ntn1b	4.46511e-08	1.3247	0.274	0.105	0.000907846	FB & MB	ntn1b
nat8l1	4.50607e-08	0.860538	0.585	0.352	0.000916173	FB & MB	nat8l
pola11	4.99339e-08	0.668267	0.717	0.465	0.00101526	FB & MB	pola1
lin28a1	5.52158e-08	0.549339	0.925	0.718	0.00112265	FB & MB	lin28a
rnd1b1	5.54766e-08	0.905096	0.425	0.208	0.00112795	FB & MB	rnd1b
otx2a	6.08409e-08	1.06066	0.17	0.047	0.00123702	FB & MB	otx2a
adgrl2a1	6.56548e-08	0.634181	0.868	0.737	0.00133489	FB & MB	adgrl2a
rnf220a1	7.23516e-08	1.18823	0.566	0.366	0.00147105	FB & MB	rnf220a
ccne21	7.30067e-08	0.755948	0.538	0.283	0.00148437	FB & MB	ccne2
ddr11	7.36328e-08	0.729217	0.689	0.421	0.0014971	FB & MB	ddr1
ildr21	8.54691e-08	0.620637	0.745	0.454	0.00173776	FB & MB	ildr2
slc12a7a	9.01722e-08	0.835292	0.67	0.443	0.00183338	FB & MB	slc12a7a
plpp3	1.35843e-07	0.813543	0.557	0.312	0.00276197	FB & MB	plpp3
gria3b	1.47634e-07	1.36018	0.16	0.045	0.00300169	FB & MB	gria3b
sema3gb1	1.49415e-07	0.786249	0.358	0.156	0.00303791	FB & MB	sema3gb
epha71	1.53525e-07	0.859281	0.708	0.442	0.00312146	FB & MB	epha7
fhdc11	2.28661e-07	0.974421	0.396	0.195	0.00464913	FB & MB	fhdc1
drg1	2.50837e-07	0.779966	0.142	0.037	0.00510001	FB & MB	drg1
BX324164.51	2.52035e-07	1.063	0.311	0.134	0.00512437	FB & MB	BX324164.5
tnrc6c2	2.70829e-07	1.08766	0.226	0.081	0.0055065	FB & MB	tnrc6c2
plxnb1a	2.91326e-07	0.808502	0.453	0.238	0.00592324	FB & MB	plxnb1a
rhov	3.16646e-07	0.719026	0.377	0.174	0.00643804	FB & MB	rhov
zgc:77158	3.31098e-07	0.858688	0.613	0.387	0.00673189	FB & MB	zgc:77158
chmp6b	3.41521e-07	0.966388	0.415	0.209	0.00694381	FB & MB	chmp6b
nr2f21	3.92567e-07	0.724668	0.519	0.292	0.00798167	FB & MB	nr2f2
tpbga1	3.94161e-07	1.06982	0.198	0.067	0.00801409	FB & MB	tpbga
pbx41	4.09825e-07	0.589112	0.887	0.742	0.00833256	FB & MB	pbx4
qki21	4.21238e-07	0.693	0.585	0.347	0.0085646	FB & MB	qki2
rdh1	8.5207e-07	0.840797	0.123	0.031	0.0173243	FB & MB	rdh1
ptprna1	8.53984e-07	0.684768	0.557	0.312	0.0173632	FB & MB	ptprna
brwd31	9.28054e-07	0.912059	0.415	0.215	0.0188692	FB & MB	brwd3
si:dkey-103i16.6	9.34509e-07	1.01106	0.208	0.074	0.0190004	FB & MB	si:dkey-103i16.6
stox2b1	1.06097e-06	0.728883	0.67	0.462	0.0215716	FB & MB	stox2b
shroom2a	1.48693e-06	0.83283	0.443	0.243	0.0302323	FB & MB	shroom2a
tnika1	1.54615e-06	0.973213	0.453	0.264	0.0314364	FB & MB	tnika
rasal21	1.61082e-06	0.69294	0.792	0.623	0.0327511	FB & MB	rasal2
ccnd1	1.71353e-06	0.57085	0.887	0.715	0.0348395	FB & MB	ccnd1
chl1b1	1.79628e-06	0.967703	0.302	0.138	0.036522	FB & MB	chl1b
fsta1	1.87054e-06	0.87337	0.292	0.128	0.0380318	FB & MB	fsta
si:ch211-212k18.51	2.04937e-06	0.807772	0.481	0.279	0.0416677	FB & MB	si:ch211-212k18.5
pcdh191	2.06153e-06	0.605284	0.755	0.547	0.0419149	FB & MB	pcdh19
SAMD5	2.08039e-06	1.5084	0.189	0.067	0.0422985	FB & MB	SAMD5
trps11	2.31515e-06	0.527946	0.868	0.717	0.0470716	FB & MB	trps1
fhdc2	2.38662e-06	0.754324	0.292	0.128	0.0485248	FB & MB	fhdc2
wnt11	2.48807e-06	0.724582	0.396	0.198	0.0505875	FB & MB	wnt11
rrm21	3.32164e-06	0.988056	0.519	0.334	0.0675356	FB & MB	rrm2
marcksl1a1	3.49608e-06	0.592783	0.774	0.593	0.0710822	FB & MB	marcksl1a
cntfr1	3.72394e-06	0.438773	0.877	0.677	0.0757152	FB & MB	cntfr
myo18aa	4.0626e-06	0.866431	0.104	0.026	0.0826008	FB & MB	myo18aa
cdk61	4.27576e-06	0.679215	0.632	0.438	0.0869347	FB & MB	cdk6
gfap1	4.29173e-06	0.64288	0.472	0.253	0.0872595	FB & MB	gfap
dtx4a1	4.37699e-06	0.755675	0.538	0.348	0.0889929	FB & MB	dtx4a
ak3	4.55277e-06	0.81826	0.208	0.078	0.0925669	FB & MB	ak3
TENM2	4.67381e-06	1.14192	0.236	0.098	0.0950279	FB & MB	TENM2
fbxl41	4.93929e-06	1.06517	0.264	0.117	0.100426	FB & MB	fbxl4
sdcbp2	4.98486e-06	0.854278	0.613	0.434	0.101352	FB & MB	sdcbp2
zgc:92107	5.05667e-06	0.662024	0.736	0.535	0.102812	FB & MB	zgc:92107
tas1r1	5.15994e-06	0.741473	0.189	0.067	0.104912	FB & MB	tas1r1
zgc:113625	5.40847e-06	0.7803	0.311	0.146	0.109965	FB & MB	zgc:113625
ldlrad2	6.03856e-06	0.888393	0.16	0.053	0.122776	FB & MB	ldlrad2
tha1	6.17635e-06	0.815934	0.217	0.085	0.125577	FB & MB	tha1
lix1	7.51359e-06	1.0805	0.151	0.049	0.152766	FB & MB	lix1
RIMS2	7.58917e-06	0.797649	0.264	0.117	0.154303	FB & MB	RIMS2
zfhx4	7.9914e-06	0.503145	0.811	0.616	0.162481	FB & MB	zfhx4
si:dkey-30c15.10	8.27764e-06	0.807844	0.368	0.195	0.168301	FB & MB	si:dkey-30c15.10
usp38	8.2922e-06	0.989106	0.226	0.094	0.168597	FB & MB	usp38
2023-03-08	8.7253e-06	0.736772	0.462	0.265	0.177403	FB & MB	2023-03-08
acvr2bb1	8.85019e-06	0.594722	0.585	0.373	0.179942	FB & MB	acvr2bb
irx1a1	9.72139e-06	0.804623	0.17	0.06	0.197655	FB & MB	irx1a
plxnb1b1	9.97801e-06	0.590941	0.726	0.53	0.202873	FB & MB	plxnb1b
msh61	1.10956e-05	0.657805	0.481	0.277	0.225596	FB & MB	msh6
ctnnd2b1	1.13309e-05	0.527909	0.509	0.284	0.23038	FB & MB	ctnnd2b
wdhd11	1.21584e-05	0.814767	0.387	0.206	0.247205	FB & MB	wdhd1
ret	1.22311e-05	0.8872	0.104	0.027	0.248683	FB & MB	ret
fgfr1b1	1.24724e-05	0.393091	0.887	0.728	0.253588	FB & MB	fgfr1b
trim711	1.34144e-05	0.458813	0.858	0.722	0.272742	FB & MB	trim71
jarid2b1	1.48427e-05	0.488846	0.934	0.846	0.301782	FB & MB	jarid2b
erc2	1.49394e-05	0.965326	0.16	0.057	0.303748	FB & MB	erc2
gpc4	1.51098e-05	0.483177	0.811	0.627	0.307213	FB & MB	gpc4
gas7a1	1.59936e-05	1.00498	0.274	0.13	0.325183	FB & MB	gas7a
phf20b	1.67482e-05	0.866907	0.472	0.297	0.340524	FB & MB	phf20b
fzd3a1	1.76185e-05	0.757199	0.575	0.393	0.35822	FB & MB	fzd3a
mycn	1.84985e-05	0.749178	0.594	0.383	0.376112	FB & MB	mycn
stab1	1.91324e-05	0.887918	0.208	0.085	0.388999	FB & MB	stab1
inka2	1.98383e-05	0.764791	0.113	0.033	0.403353	FB & MB	inka2
jade3	2.02808e-05	0.868875	0.453	0.285	0.41235	FB & MB	jade3
FP236735.1	2.05339e-05	0.823384	0.123	0.037	0.417495	FB & MB	FP236735.1
fgf6a	2.10787e-05	0.688966	0.16	0.056	0.428572	FB & MB	fgf6a
gdf11	2.18985e-05	0.770654	0.387	0.218	0.44524	FB & MB	gdf11
rhpn1	2.19201e-05	0.905282	0.236	0.105	0.44568	FB & MB	rhpn1
phc2b	2.492e-05	0.863837	0.236	0.104	0.506673	FB & MB	phc2b
poglut1	2.57662e-05	0.64773	0.302	0.145	0.523879	FB & MB	poglut1
zgc:158689	2.63687e-05	0.846844	0.302	0.151	0.536129	FB & MB	zgc:158689
sdc4	2.65963e-05	0.567834	0.755	0.585	0.540757	FB & MB	sdc4
pfkfb31	2.69862e-05	0.904781	0.302	0.156	0.548683	FB & MB	pfkfb3
rgs3b1	2.71516e-05	0.635345	0.283	0.132	0.552047	FB & MB	rgs3b
myh141	2.81126e-05	0.76532	0.358	0.191	0.571584	FB & MB	myh14
cntn5	2.84397e-05	0.976027	0.104	0.029	0.578236	FB & MB	cntn5
kcnh6a1	3.00156e-05	0.877413	0.283	0.137	0.610278	FB & MB	kcnh6a
dennd5a	3.03322e-05	0.80883	0.491	0.315	0.616715	FB & MB	dennd5a
fbxl14b	3.05559e-05	0.694878	0.387	0.217	0.621263	FB & MB	fbxl14b
zmp:0000000524	3.07143e-05	0.892954	0.104	0.029	0.624483	FB & MB	zmp:0000000524
iqce	3.09671e-05	0.601562	0.17	0.062	0.629623	FB & MB	iqce
bcor	3.20796e-05	0.849944	0.321	0.165	0.652242	FB & MB	bcor
melk	3.443e-05	0.6848	0.245	0.11	0.700032	FB & MB	melk
syne2b	3.60384e-05	0.584499	0.472	0.282	0.732733	FB & MB	syne2b
mapk12b1	3.67832e-05	0.819094	0.321	0.168	0.747877	FB & MB	mapk12b
aspm1	3.68787e-05	0.597809	0.623	0.416	0.749819	FB & MB	aspm
ebf2	3.77792e-05	0.436986	0.283	0.133	0.768126	FB & MB	ebf2
tenm4	4.06463e-05	0.405926	0.774	0.584	0.826421	FB & MB	tenm4
brd2b	4.5365e-05	0.759493	0.236	0.106	0.922361	FB & MB	brd2b
ccnd2a1	5.02544e-05	0.631411	0.528	0.35	1	FB & MB	ccnd2a
wdr761	5.21013e-05	0.726617	0.368	0.204	1	FB & MB	wdr76
plekha7b1	5.24693e-05	0.718727	0.425	0.254	1	FB & MB	plekha7b
roraa	5.55105e-05	0.990471	0.123	0.04	1	FB & MB	roraa
lrrn11	5.55611e-05	0.592229	0.425	0.242	1	FB & MB	lrrn1
rpa11	5.68978e-05	0.654208	0.472	0.287	1	FB & MB	rpa1
wipf2b	6.32749e-05	0.763111	0.236	0.109	1	FB & MB	wipf2b
tcf7l2	6.75822e-05	0.730842	0.472	0.301	1	FB & MB	tcf7l2
jam3b1	6.98572e-05	0.5644	0.5	0.319	1	FB & MB	jam3b
celf3a1	7.12518e-05	0.884269	0.472	0.308	1	FB & MB	celf3a
sox131	7.47797e-05	0.744879	0.509	0.332	1	FB & MB	sox13
slc35f1	8.31962e-05	0.849677	0.264	0.132	1	FB & MB	slc35f1
nexmifb	8.39594e-05	1.14161	0.33	0.188	1	FB & MB	nexmifb
kctd171	8.8594e-05	0.826563	0.434	0.279	1	FB & MB	kctd17
epha4a	9.18412e-05	0.587578	0.566	0.358	1	FB & MB	epha4a
dtnba1	9.49861e-05	0.463933	0.575	0.388	1	FB & MB	dtnba
sinhcafl.1	9.74158e-05	0.678197	0.462	0.29	1	FB & MB	sinhcafl.1
si:dkey-185e18.7	0.000101831	0.744812	0.226	0.105	1	FB & MB	si:dkey-185e18.7
eml1	0.000105379	0.799788	0.208	0.092	1	FB & MB	eml1
ephb2b1	0.000105409	0.695963	0.434	0.264	1	FB & MB	ephb2b
si:dkey-208m12.2	0.000106158	0.728449	0.113	0.037	1	FB & MB	si:dkey-208m12.2
hibadhb	0.000108347	0.687676	0.132	0.046	1	FB & MB	hibadhb
ttbk1b	0.000108977	0.863595	0.132	0.047	1	FB & MB	ttbk1b
pik3c2b	0.000111421	0.461749	0.651	0.456	1	FB & MB	pik3c2b
stac	0.000111815	0.744638	0.264	0.132	1	FB & MB	stac
klhl23	0.000112346	0.72441	0.189	0.08	1	FB & MB	klhl23
smim8	0.000114374	0.770938	0.104	0.032	1	FB & MB	smim8
negr11	0.000115001	0.26592	0.679	0.424	1	FB & MB	negr1
ctdspl2b	0.000115682	0.788812	0.283	0.145	1	FB & MB	ctdspl2b
atp9b	0.00011921	0.563721	0.283	0.14	1	FB & MB	atp9b
robo2.1	0.000119702	0.796325	0.198	0.085	1	FB & MB	robo2.1
hmga1a	0.000121052	0.451576	0.858	0.726	1	FB & MB	hmga1a
kaznb1	0.000122847	0.70301	0.604	0.429	1	FB & MB	kaznb
zwilch	0.00014186	0.619234	0.189	0.08	1	FB & MB	zwilch
cbx7a	0.000150343	0.769169	0.491	0.337	1	FB & MB	cbx7a
nkx2.4b	0.000150581	0.68059	0.104	0.033	1	FB & MB	nkx2.4b
scube3	0.000159472	0.812618	0.406	0.26	1	FB & MB	scube3
sh3bp4a	0.00016007	0.626815	0.443	0.272	1	FB & MB	sh3bp4a
eif4g3a1	0.00016456	0.438479	0.491	0.294	1	FB & MB	eif4g3a
jag2b1	0.000166703	0.369017	0.925	0.796	1	FB & MB	jag2b
zeb1b	0.000169784	0.551729	0.708	0.576	1	FB & MB	zeb1b
qkib1	0.000172321	0.382283	0.481	0.293	1	FB & MB	qkib
rrm2.11	0.000172791	0.542582	0.708	0.544	1	FB & MB	rrm2.1
pcdh18a	0.000175029	0.841607	0.113	0.038	1	FB & MB	pcdh18a
bcl2l161	0.000175269	0.554892	0.283	0.145	1	FB & MB	bcl2l16
macf1a	0.000175658	0.35709	0.943	0.791	1	FB & MB	macf1a
eef1e1	0.000177239	0.69667	0.302	0.161	1	FB & MB	eef1e1
adnp2b	0.000183542	0.658153	0.396	0.233	1	FB & MB	adnp2b
gpnmb	0.000184448	0.606114	0.113	0.038	1	FB & MB	gpnmb
ldb2b	0.000193657	0.72501	0.208	0.095	1	FB & MB	ldb2b
rgs6	0.000197202	0.733131	0.245	0.121	1	FB & MB	rgs6
si:ch211-269k10.21	0.000205909	0.561576	0.453	0.283	1	FB & MB	si:ch211-269k10.2
fbxl16	0.000207636	0.64644	0.151	0.059	1	FB & MB	fbxl16
atf31	0.00021038	0.621352	0.736	0.608	1	FB & MB	atf3
tmem132e	0.000212652	0.771787	0.698	0.571	1	FB & MB	tmem132e
FRMD1	0.000214133	0.511754	0.217	0.1	1	FB & MB	FRMD1
cnn3b	0.000216668	0.657942	0.264	0.135	1	FB & MB	cnn3b
dnmt11	0.00021686	0.66196	0.33	0.184	1	FB & MB	dnmt1
foxo6b	0.00022043	0.911027	0.142	0.054	1	FB & MB	foxo6b
rb1	0.000226548	0.650073	0.5	0.348	1	FB & MB	rb1
etv5b	0.000230212	0.591848	0.434	0.272	1	FB & MB	etv5b
h2az2b1	0.000255545	0.39423	0.698	0.518	1	FB & MB	h2az2b
cyth1b	0.000257438	0.584511	0.547	0.369	1	FB & MB	cyth1b
dhodh	0.000262294	0.662868	0.151	0.06	1	FB & MB	dhodh
zeb1a1	0.000285795	0.741948	0.406	0.254	1	FB & MB	zeb1a
arhgap29a	0.00028671	0.367221	0.575	0.386	1	FB & MB	arhgap29a
col28a2a	0.000289898	0.960837	0.198	0.093	1	FB & MB	col28a2a
her4.2	0.000293503	0.648785	0.358	0.206	1	FB & MB	her4.2
jak1	0.0003018	0.578605	0.792	0.689	1	FB & MB	jak1
zgc:113263	0.000318654	0.894028	0.302	0.172	1	FB & MB	zgc:113263
FQ311908.1	0.000331093	0.645106	0.208	0.096	1	FB & MB	FQ311908.1
nsd21	0.000333692	0.651175	0.443	0.282	1	FB & MB	nsd2
srgap1a	0.000335902	0.45348	0.736	0.55	1	FB & MB	srgap1a
lig11	0.000349993	0.526551	0.519	0.347	1	FB & MB	lig1
gmnn	0.000350681	0.732835	0.406	0.265	1	FB & MB	gmnn
arhgap35a1	0.000356128	0.472499	0.84	0.754	1	FB & MB	arhgap35a
fcho11	0.000376508	0.582587	0.434	0.272	1	FB & MB	fcho1
si:dkey-91i10.2	0.000385267	0.594423	0.132	0.051	1	FB & MB	si:dkey-91i10.2
metrn1	0.000390329	0.537102	0.547	0.383	1	FB & MB	metrn
slc7a71	0.000402656	0.742425	0.443	0.292	1	FB & MB	slc7a7
eed	0.000425866	0.625314	0.16	0.068	1	FB & MB	eed
fam174b	0.00042799	0.551416	0.179	0.079	1	FB & MB	fam174b
mthfd1b1	0.000435477	0.494509	0.547	0.39	1	FB & MB	mthfd1b
foxo3b	0.000444005	0.99552	0.321	0.196	1	FB & MB	foxo3b
bmb1	0.000444085	0.819148	0.189	0.089	1	FB & MB	bmb
agbl4.1	0.000475959	0.526679	0.443	0.29	1	FB & MB	agbl4.1
tmem184a	0.000484803	0.761955	0.189	0.087	1	FB & MB	tmem184a
lbr1	0.000499518	0.661599	0.528	0.39	1	FB & MB	lbr
shroom41	0.000509053	0.505834	0.575	0.415	1	FB & MB	shroom4
slbp	0.000510586	0.632572	0.547	0.393	1	FB & MB	slbp
efs	0.000533215	0.600275	0.217	0.106	1	FB & MB	efs
fmnl2b	0.000535817	0.564439	0.491	0.336	1	FB & MB	fmnl2b
esco21	0.000547506	0.56381	0.245	0.126	1	FB & MB	esco2
spc25	0.000558785	0.7395	0.17	0.077	1	FB & MB	spc25
gpm6ba	0.000575608	0.824615	0.151	0.065	1	FB & MB	gpm6ba
cbx6b	0.000576629	0.564841	0.104	0.036	1	FB & MB	cbx6b
itga6a1	0.000584599	0.546682	0.34	0.201	1	FB & MB	itga6a
nap1l1	0.000585865	0.617107	0.509	0.368	1	FB & MB	nap1l1
si:ch211-286o17.11	0.000590671	0.592819	0.406	0.253	1	FB & MB	si:ch211-286o17.1
phf20a	0.000593099	0.756334	0.104	0.037	1	FB & MB	phf20a
cenpk1	0.000603586	0.777252	0.368	0.225	1	FB & MB	cenpk
zgc:1534051	0.000605192	0.467092	0.406	0.25	1	FB & MB	zgc:153405
msna1	0.000634834	0.596005	0.519	0.354	1	FB & MB	msna
nav2a1	0.000643546	0.37526	0.566	0.4	1	FB & MB	nav2a
lfng1	0.000645419	0.409028	0.66	0.497	1	FB & MB	lfng
pip4k2aa	0.00065809	0.568878	0.283	0.155	1	FB & MB	pip4k2aa
prpf40a1	0.000692403	0.41573	0.5	0.323	1	FB & MB	prpf40a
pip4p2	0.000693603	0.611016	0.236	0.121	1	FB & MB	pip4p2
acsl21	0.000703639	0.403666	0.453	0.282	1	FB & MB	acsl2
BX511034.71	0.000708922	0.675841	0.226	0.117	1	FB & MB	BX511034.7
ccdc6b	0.000709523	0.784047	0.226	0.118	1	FB & MB	ccdc6b
tp53inp1	0.000749245	0.858055	0.274	0.162	1	FB & MB	tp53inp1
si:dkey-261m9.6	0.000750345	0.660598	0.151	0.065	1	FB & MB	si:dkey-261m9.6
eme11	0.000759213	0.436986	0.443	0.28	1	FB & MB	eme1
si:ch73-386h18.11	0.000774442	0.643939	0.519	0.37	1	FB & MB	si:ch73-386h18.1
znf438	0.000780334	0.535705	0.425	0.272	1	FB & MB	znf438
CABZ01058261.1	0.000785695	0.533632	0.472	0.316	1	FB & MB	CABZ01058261.1
efna3b	0.000787407	0.691808	0.425	0.29	1	FB & MB	efna3b
pcyt1aa	0.000795255	0.641409	0.113	0.042	1	FB & MB	pcyt1aa
mllt101	0.000796213	0.45296	0.821	0.731	1	FB & MB	mllt10
ublcp1	0.000819316	0.647496	0.198	0.097	1	FB & MB	ublcp1
fosab	0.000820127	0.535836	0.689	0.544	1	FB & MB	fosab
slc44a5b	0.000821444	0.552259	0.302	0.172	1	FB & MB	slc44a5b
s1pr1	0.000846263	0.627486	0.123	0.048	1	FB & MB	s1pr1
rrm11	0.000857822	0.516988	0.434	0.281	1	FB & MB	rrm1
tinf2	0.000883099	0.627893	0.17	0.078	1	FB & MB	tinf2
CU459056.1	0.000884043	0.570356	0.443	0.295	1	FB & MB	CU459056.1
ttc9c	0.000891222	0.572841	0.179	0.084	1	FB & MB	ttc9c
si:ch211-222l21.1	0.000922536	0.368246	0.877	0.803	1	FB & MB	si:ch211-222l21.1
prim21	0.000923672	0.574723	0.557	0.393	1	FB & MB	prim2
hltf1	0.000936488	0.716991	0.264	0.146	1	FB & MB	hltf
sox31	0.000938071	0.473242	0.481	0.325	1	FB & MB	sox3
chd7	0.000940306	0.406759	0.764	0.654	1	FB & MB	chd7
pik3ca	0.000941476	0.801312	0.321	0.196	1	FB & MB	pik3ca
fbxo51	0.000944464	0.672426	0.453	0.32	1	FB & MB	fbxo5
tusc3	0.000956352	0.776382	0.434	0.302	1	FB & MB	tusc3
BX510922.4	0.00098544	0.72592	0.16	0.073	1	FB & MB	BX510922.4
CU639469.1	0.00100759	0.734395	0.311	0.188	1	FB & MB	CU639469.1
gulp1a1	0.00101326	0.747155	0.283	0.164	1	FB & MB	gulp1a
tsen34	0.00104214	0.868349	0.132	0.056	1	FB & MB	tsen34
rnf441	0.00113778	0.483642	0.651	0.514	1	FB & MB	rnf44
sema6bb	0.00114481	0.454989	0.16	0.071	1	FB & MB	sema6bb
ube2nb	0.00116077	0.573967	0.151	0.067	1	FB & MB	ube2nb
wnt7aa	0.00118121	0.746769	0.113	0.044	1	FB & MB	wnt7aa
suco	0.00118265	0.413858	0.557	0.4	1	FB & MB	suco
si:dkey-183j2.10	0.00118526	0.673506	0.274	0.157	1	FB & MB	si:dkey-183j2.10
srsf3a	0.00118872	0.521243	0.274	0.152	1	FB & MB	srsf3a
pcna	0.0012051	0.479522	0.547	0.386	1	FB & MB	pcna
clip2	0.00122738	0.528909	0.406	0.258	1	FB & MB	clip2
cops3	0.00123518	0.582837	0.16	0.073	1	FB & MB	cops3
mdka1	0.00129965	0.359217	0.632	0.481	1	FB & MB	mdka
bckdha	0.00137322	0.559322	0.123	0.05	1	FB & MB	bckdha
cnppd1	0.00137512	0.70336	0.179	0.088	1	FB & MB	cnppd1
robo11	0.00144969	0.363337	0.925	0.814	1	FB & MB	robo1
flr	0.0014727	0.6443	0.208	0.108	1	FB & MB	flr
ska3	0.00147911	0.642757	0.179	0.088	1	FB & MB	ska3
zgc:173615	0.00148042	0.564034	0.217	0.113	1	FB & MB	zgc:173615
mapre1a	0.00148925	0.510129	0.123	0.05	1	FB & MB	mapre1a
rfx3	0.00152091	0.584465	0.311	0.189	1	FB & MB	rfx3
si:dkey-7j14.6	0.0015351	0.658586	0.302	0.183	1	FB & MB	si:dkey-7j14.6
si:ch211-89o9.6	0.00155285	0.559187	0.113	0.045	1	FB & MB	si:ch211-89o9.6
bckdhb	0.00155901	0.424253	0.236	0.125	1	FB & MB	bckdhb
mcm10	0.0016323	0.55782	0.255	0.142	1	FB & MB	mcm10
LO018154.1	0.00165015	0.536206	0.198	0.1	1	FB & MB	LO018154.1
ppp2r5a1	0.00167503	0.63743	0.321	0.197	1	FB & MB	ppp2r5a
inavab	0.00172286	0.488614	0.425	0.283	1	FB & MB	inavab
cth	0.0017395	0.550643	0.151	0.069	1	FB & MB	cth
cemip21	0.00174195	0.405138	0.613	0.495	1	FB & MB	cemip2
hmgb2b1	0.00175847	0.530535	0.481	0.339	1	FB & MB	hmgb2b
hmmr1	0.00176619	0.462467	0.283	0.162	1	FB & MB	hmmr
stat31	0.00176738	0.256342	0.991	0.926	1	FB & MB	stat3
si:ch211-276c2.4	0.00177783	0.827523	0.245	0.141	1	FB & MB	si:ch211-276c2.4
xylt1	0.00182105	0.518812	0.585	0.439	1	FB & MB	xylt1
letm11	0.00183087	0.723748	0.387	0.262	1	FB & MB	letm1
MZT1	0.00183241	0.685485	0.16	0.076	1	FB & MB	MZT1
myo10	0.00185006	0.450146	0.443	0.292	1	FB & MB	myo10
hmgn21	0.00185145	0.527798	0.538	0.402	1	FB & MB	hmgn2
cdc25b	0.00185173	0.331731	0.538	0.368	1	FB & MB	cdc25b
skib	0.00185211	0.625596	0.255	0.145	1	FB & MB	skib
nectin3b	0.00189812	0.523193	0.623	0.465	1	FB & MB	nectin3b
zeb2a1	0.00189968	0.353704	0.764	0.603	1	FB & MB	zeb2a
mcm6	0.00198128	0.640275	0.302	0.186	1	FB & MB	mcm6
mospd1	0.00203542	0.721228	0.245	0.14	1	FB & MB	mospd1
adgrg1.1	0.00205135	0.702554	0.226	0.125	1	FB & MB	adgrg1.1
cbx3a1	0.00209414	0.431887	0.443	0.298	1	FB & MB	cbx3a
pag1	0.0021356	0.810421	0.283	0.167	1	FB & MB	pag1
tnrc6a	0.00214971	0.503273	0.623	0.517	1	FB & MB	tnrc6a
wasf3b1	0.00218164	0.438872	0.575	0.428	1	FB & MB	wasf3b
slc4a71	0.00219208	0.305436	0.557	0.386	1	FB & MB	slc4a7
atmin	0.00219222	0.499451	0.123	0.052	1	FB & MB	atmin
ppp1r7	0.00220519	0.48712	0.217	0.115	1	FB & MB	ppp1r7
kdm2ab	0.00227904	0.46623	0.415	0.275	1	FB & MB	kdm2ab
mapre1b	0.00228305	0.607505	0.264	0.154	1	FB & MB	mapre1b
CABZ01054394.1	0.00231621	0.63851	0.17	0.084	1	FB & MB	CABZ01054394.1
ssuh2rs1	0.00233699	0.413668	0.415	0.275	1	FB & MB	ssuh2rs1
cldn12	0.00241824	0.627776	0.151	0.071	1	FB & MB	cldn12
si:ch211-153a8.41	0.00242203	0.611623	0.443	0.316	1	FB & MB	si:ch211-153a8.4
clmn	0.00245181	0.514154	0.226	0.123	1	FB & MB	clmn
hs3st3b1b1	0.00246225	0.653661	0.472	0.34	1	FB & MB	hs3st3b1b
rad18	0.0025088	0.548533	0.425	0.292	1	FB & MB	rad18
BX470214.1	0.00253611	0.620532	0.142	0.064	1	FB & MB	BX470214.1
chd4a	0.00253825	0.430354	0.585	0.442	1	FB & MB	chd4a
zgc:173585	0.00263121	0.528803	0.255	0.148	1	FB & MB	zgc:173585
pole1	0.00270368	0.656141	0.368	0.246	1	FB & MB	pole
pacsin1b	0.00272175	0.524097	0.123	0.053	1	FB & MB	pacsin1b
pcdh17	0.0027664	1.32202	0.208	0.113	1	FB & MB	pcdh17
sox11b1	0.00276845	0.529747	0.377	0.251	1	FB & MB	sox11b
hnrnpr	0.00281459	0.454516	0.16	0.077	1	FB & MB	hnrnpr
kiz	0.00285877	0.638801	0.236	0.136	1	FB & MB	kiz
ANOS1	0.00310534	0.641316	0.179	0.092	1	FB & MB	ANOS1
auts2a	0.00312265	0.456883	0.528	0.397	1	FB & MB	auts2a
CU457819.1	0.00312506	0.793325	0.189	0.103	1	FB & MB	CU457819.1
nlk1	0.00315332	0.441583	0.453	0.312	1	FB & MB	nlk1
usp46	0.00324509	0.709817	0.113	0.049	1	FB & MB	usp46
c4b1	0.00334722	0.766914	0.283	0.177	1	FB & MB	c4b
arhgap32b1	0.00339217	0.501925	0.519	0.377	1	FB & MB	arhgap32b
hnrnpm	0.00341669	0.298876	0.811	0.731	1	FB & MB	hnrnpm
rttn1	0.00341798	0.485306	0.292	0.178	1	FB & MB	rttn
kif20a	0.00342272	0.626385	0.462	0.35	1	FB & MB	kif20a
si:ch211-266o15.1	0.00345465	0.498661	0.472	0.352	1	FB & MB	si:ch211-266o15.1
nbeaa	0.00349514	0.333449	0.377	0.243	1	FB & MB	nbeaa
si:ch1073-153i20.4	0.00359453	0.501198	0.311	0.197	1	FB & MB	si:ch1073-153i20.4
bub1bb	0.00365647	0.706764	0.189	0.101	1	FB & MB	bub1bb
rbm25b	0.00368204	0.455699	0.443	0.31	1	FB & MB	rbm25b
clgn	0.00368386	0.60275	0.255	0.152	1	FB & MB	clgn
orc6	0.00370901	0.482518	0.264	0.156	1	FB & MB	orc6
rubcn	0.00372457	0.676544	0.113	0.049	1	FB & MB	rubcn
cyfip2	0.00377093	0.541858	0.236	0.135	1	FB & MB	cyfip2
ccdc821	0.00377565	0.61475	0.274	0.17	1	FB & MB	ccdc82
brwd1	0.00378686	0.514832	0.472	0.345	1	FB & MB	brwd1
asf1ba	0.00381788	0.582146	0.151	0.074	1	FB & MB	asf1ba
si:ch211-153j24.3	0.00381941	0.572399	0.311	0.197	1	FB & MB	si:ch211-153j24.3
sdc2	0.00382953	0.494841	0.34	0.22	1	FB & MB	sdc2
cby1	0.00389984	0.634275	0.17	0.088	1	FB & MB	cby1
cdc45	0.0039118	0.605797	0.302	0.193	1	FB & MB	cdc45
sass61	0.00392624	0.47209	0.255	0.148	1	FB & MB	sass6
dpp6b	0.00394938	0.461632	0.132	0.06	1	FB & MB	dpp6b
fbxo30b	0.00395492	0.658402	0.104	0.044	1	FB & MB	fbxo30b
gng21	0.00396459	0.660558	0.217	0.123	1	FB & MB	gng2
brpf1	0.00397503	0.524715	0.104	0.043	1	FB & MB	brpf1
si:ch73-383l1.1	0.00403234	1.06066	0.151	0.075	1	FB & MB	si:ch73-383l1.1
ank2b1	0.00403809	0.47173	0.538	0.425	1	FB & MB	ank2b
tsr2	0.00406567	0.525523	0.34	0.222	1	FB & MB	tsr2
ccdc88c1	0.00407769	0.512606	0.509	0.387	1	FB & MB	ccdc88c
arhgap42b	0.00413539	0.8529	0.142	0.069	1	FB & MB	arhgap42b
zeb2b1	0.00417185	0.785	0.208	0.118	1	FB & MB	zeb2b
acsl4a	0.00421138	0.492696	0.16	0.08	1	FB & MB	acsl4a
fam204a	0.00422719	0.723608	0.123	0.056	1	FB & MB	fam204a
men11	0.00426214	0.71405	0.245	0.149	1	FB & MB	men1
fut8a	0.00428703	0.314799	0.443	0.296	1	FB & MB	fut8a
cbx1a	0.00428784	0.476044	0.491	0.365	1	FB & MB	cbx1a
kpnb31	0.00433511	0.667645	0.396	0.282	1	FB & MB	kpnb3
eif4h	0.00441329	0.462708	0.472	0.359	1	FB & MB	eif4h
zgc:110249	0.00442967	0.517032	0.226	0.129	1	FB & MB	zgc:110249
tmpoa	0.00455927	0.409918	0.368	0.243	1	FB & MB	tmpoa
fem1b	0.00464521	0.569437	0.132	0.062	1	FB & MB	fem1b
mibp1	0.00474822	0.472302	0.453	0.319	1	FB & MB	mibp
mcph1	0.00479034	0.767811	0.16	0.082	1	FB & MB	mcph1
adam8b	0.00487036	0.510279	0.123	0.056	1	FB & MB	adam8b
sec22c1	0.00491336	0.499451	0.123	0.056	1	FB & MB	sec22c
cachd1	0.00494067	0.399015	0.764	0.65	1	FB & MB	cachd1
nck2b1	0.00496805	0.458492	0.651	0.539	1	FB & MB	nck2b
rybpb	0.0050514	0.632879	0.236	0.142	1	FB & MB	rybpb
rad1	0.0051241	0.569708	0.123	0.056	1	FB & MB	rad1
klhl20	0.0051371	0.62997	0.217	0.125	1	FB & MB	klhl20
dut	0.00514566	0.600839	0.16	0.082	1	FB & MB	dut
CR352220.2	0.00515714	0.495403	0.415	0.29	1	FB & MB	CR352220.2
numa1	0.00521994	0.529617	0.292	0.182	1	FB & MB	numa1
hells	0.00523035	0.726208	0.292	0.193	1	FB & MB	hells
rad50	0.00525115	0.441513	0.151	0.074	1	FB & MB	rad50
sox9b	0.00526074	0.379225	0.16	0.081	1	FB & MB	sox9b
dtl1	0.00530049	0.820145	0.302	0.203	1	FB & MB	dtl
gltpa	0.00531474	0.642633	0.104	0.045	1	FB & MB	gltpa
si:dkey-1b17.5	0.00545572	0.544875	0.132	0.063	1	FB & MB	si:dkey-1b17.5
arcn1b	0.00548337	0.559669	0.132	0.063	1	FB & MB	arcn1b
ccna2	0.005494	0.689718	0.292	0.183	1	FB & MB	ccna2
stox1	0.00553627	0.510463	0.198	0.109	1	FB & MB	stox1
hirip3	0.00555057	0.524238	0.245	0.145	1	FB & MB	hirip3
dpysl5a1	0.00562355	0.548106	0.16	0.082	1	FB & MB	dpysl5a
rnaseh2b	0.00562501	0.744466	0.17	0.091	1	FB & MB	rnaseh2b
phf21aa1	0.00569256	0.402579	0.358	0.235	1	FB & MB	phf21aa
slc7a3a1	0.00575589	0.463189	0.443	0.319	1	FB & MB	slc7a3a
tfdp21	0.00578484	0.489761	0.358	0.239	1	FB & MB	tfdp2
xxylt1	0.0058871	0.514821	0.264	0.161	1	FB & MB	xxylt1
snphb	0.00592335	0.44209	0.123	0.056	1	FB & MB	snphb
lpl	0.00592831	0.493633	0.302	0.193	1	FB & MB	lpl
kmt2cb	0.00592976	0.26746	0.915	0.869	1	FB & MB	kmt2cb
mapk111	0.00593913	0.398996	0.236	0.136	1	FB & MB	mapk11
st8sia21	0.00597049	0.59757	0.16	0.082	1	FB & MB	st8sia2
nusap11	0.00604845	0.503333	0.358	0.24	1	FB & MB	nusap1
dnajb6a	0.00606717	0.465609	0.443	0.328	1	FB & MB	dnajb6a
C18H11orf58	0.00615388	0.699046	0.132	0.064	1	FB & MB	C18H11orf58
tnip1	0.00620201	0.512802	0.33	0.221	1	FB & MB	tnip1
her4.4	0.00622192	0.859953	0.16	0.085	1	FB & MB	her4.4
sulf2b1	0.00623961	0.709316	0.142	0.071	1	FB & MB	sulf2b
znf740b	0.00629361	0.654361	0.302	0.204	1	FB & MB	znf740b
dna2	0.00639746	0.503545	0.292	0.185	1	FB & MB	dna2
npat	0.00655967	0.511668	0.255	0.155	1	FB & MB	npat
hnrnpub	0.00659523	0.566779	0.575	0.488	1	FB & MB	hnrnpub
e2f8	0.00662633	0.45255	0.245	0.146	1	FB & MB	e2f8
plagl21	0.00667545	0.276184	0.745	0.608	1	FB & MB	plagl2
myl9b	0.00675518	0.416341	0.358	0.242	1	FB & MB	myl9b
aqp10b	0.00677951	0.559861	0.151	0.077	1	FB & MB	aqp10b
isg20	0.00678707	0.357605	0.557	0.423	1	FB & MB	isg20
trnau1apa	0.00681556	0.455545	0.189	0.103	1	FB & MB	trnau1apa
mcm3	0.0068516	0.565363	0.33	0.218	1	FB & MB	mcm3
ctdp11	0.00700367	0.295643	0.802	0.704	1	FB & MB	ctdp1
nkd11	0.00706258	0.251416	0.491	0.341	1	FB & MB	nkd1
BX544877.2	0.00706319	0.625015	0.226	0.136	1	FB & MB	BX544877.2
znf1851	0.00713447	0.432931	0.16	0.083	1	FB & MB	znf185
ncapd3	0.00717269	0.459544	0.226	0.132	1	FB & MB	ncapd3
polr2i	0.00719587	0.571916	0.179	0.099	1	FB & MB	polr2i
fer1l4	0.00720638	0.660608	0.396	0.29	1	FB & MB	fer1l4
ttyh3b	0.0072809	0.533602	0.274	0.169	1	FB & MB	ttyh3b
gulp1b1	0.00728403	0.574116	0.17	0.091	1	FB & MB	gulp1b
si:ch211-207i1.21	0.00731175	0.45658	0.302	0.195	1	FB & MB	si:ch211-207i1.2
CT998556.1	0.00745804	0.783665	0.132	0.066	1	FB & MB	CT998556.1
si:dkey-244a7.11	0.00752169	0.459159	0.566	0.451	1	FB & MB	si:dkey-244a7.1
nuf21	0.00752433	0.489563	0.189	0.105	1	FB & MB	nuf2
tcf3b	0.00755486	0.39848	0.708	0.61	1	FB & MB	tcf3b
si:ch211-155e24.3	0.00756355	0.492269	0.142	0.071	1	FB & MB	si:ch211-155e24.3
clockb	0.00766634	0.631295	0.264	0.17	1	FB & MB	clockb
tmtc1	0.007671	0.434565	0.283	0.177	1	FB & MB	tmtc1
ptpn6	0.00769597	0.802326	0.255	0.163	1	FB & MB	ptpn6
ezh2	0.00773484	0.431327	0.358	0.238	1	FB & MB	ezh2
tefa	0.00774927	0.475992	0.453	0.334	1	FB & MB	tefa
psmg2	0.00777805	0.490778	0.16	0.084	1	FB & MB	psmg2
rabggtb	0.00784192	0.527752	0.113	0.052	1	FB & MB	rabggtb
nup43	0.00793362	0.501461	0.151	0.078	1	FB & MB	nup43
abcb51	0.00799009	0.546805	0.349	0.228	1	FB & MB	abcb5
si:dkey-151g10.31	0.00804853	0.439703	0.434	0.312	1	FB & MB	si:dkey-151g10.3
col27a1b	0.00811274	0.581999	0.151	0.078	1	FB & MB	col27a1b
osbpl2b	0.00813037	0.502194	0.217	0.128	1	FB & MB	osbpl2b
insrb	0.00817862	0.3493	0.896	0.85	1	FB & MB	insrb
fam53b	0.00818425	0.541479	0.358	0.246	1	FB & MB	fam53b
acss1	0.0082297	0.529579	0.255	0.156	1	FB & MB	acss1
itpr1a	0.00836983	0.67101	0.104	0.047	1	FB & MB	itpr1a
socs5a	0.00838822	0.512802	0.321	0.213	1	FB & MB	socs5a
tubd1	0.00850921	0.580068	0.226	0.136	1	FB & MB	tubd1
flrt3	0.00870743	0.386316	0.377	0.262	1	FB & MB	flrt3
gnb1b	0.00875123	0.32923	0.755	0.655	1	FB & MB	gnb1b
nin1	0.00875941	0.540048	0.283	0.183	1	FB & MB	nin
ctnna21	0.00877525	0.278469	0.311	0.206	1	FB & MB	ctnna2
nup37	0.00880686	0.6034	0.226	0.14	1	FB & MB	nup37
pold2	0.00901601	0.645734	0.113	0.053	1	FB & MB	pold2
xrcc4	0.00905101	0.494472	0.132	0.066	1	FB & MB	xrcc4
si:dkey-102m7.3	0.00906591	0.329707	0.519	0.386	1	FB & MB	si:dkey-102m7.3
tfap4	0.00908127	0.374002	0.642	0.546	1	FB & MB	tfap4
chaf1a1	0.00909385	0.512749	0.613	0.472	1	FB & MB	chaf1a
fibpa	0.00926558	0.521947	0.16	0.085	1	FB & MB	fibpa
ctcf1	0.00950407	0.407065	0.387	0.274	1	FB & MB	ctcf
cenpf1	0.00964256	0.648311	0.406	0.31	1	FB & MB	cenpf
lrrc40	0.00972701	0.620398	0.179	0.103	1	FB & MB	lrrc40
cirbpa1	0.00983434	0.379366	0.755	0.661	1	FB & MB	cirbpa
igf2bp31	0.00986671	0.312759	0.802	0.736	1	FB & MB	igf2bp3
en2b	1.50701e-102	3.29769	0.647	0.049	3.06405e-98	MHB.1	en2b
wnt1	2.6721e-93	3.29732	0.422	0.017	5.43291e-89	MHB.1	wnt1
pax7a	1.4114e-78	3.30264	0.52	0.043	2.86966e-74	MHB.1	pax7a
pdgfbb1	2.26808e-71	2.70707	0.667	0.088	4.61146e-67	MHB.1	pdgfbb
ackr3a	5.00596e-59	1.88949	0.225	0.006	1.01781e-54	MHB.1	ackr3a
pax5	5.82992e-54	3.11529	0.51	0.067	1.18534e-49	MHB.1	pax5
dab1b	1.03869e-52	2.00624	0.255	0.012	2.11187e-48	MHB.1	dab1b
dmbx1a1	1.3335e-50	2.23716	0.343	0.028	2.71126e-46	MHB.1	dmbx1a
wnt8b1	1.0815e-49	2.613	0.637	0.121	2.19891e-45	MHB.1	wnt8b
wnt3	1.12315e-44	2.53627	0.814	0.262	2.28359e-40	MHB.1	wnt3
fgf22	2.90145e-41	2.18446	0.196	0.009	5.89923e-37	MHB.1	fgf22
ndst2b1	3.4842e-40	2.06645	0.735	0.202	7.08408e-36	MHB.1	ndst2b
otx11	4.01273e-40	1.95869	0.422	0.059	8.15869e-36	MHB.1	otx1
gria3b1	1.68454e-38	2.42226	0.324	0.035	3.42501e-34	MHB.1	gria3b
lmx1bb	7.29191e-35	2.32665	0.598	0.145	1.48259e-30	MHB.1	lmx1bb
rbm33b	1.10371e-32	1.841	0.186	0.012	2.24405e-28	MHB.1	rbm33b
pax2a	4.93985e-32	1.94507	0.588	0.143	1.00437e-27	MHB.1	pax2a
mapk1	7.58788e-30	1.90655	0.716	0.257	1.54277e-25	MHB.1	mapk1
cacnb3b	7.9456e-30	1.52854	0.186	0.013	1.6155e-25	MHB.1	cacnb3b
pou3f3a2	2.58036e-29	1.66888	0.549	0.136	5.24639e-25	MHB.1	pou3f3a
gas7a2	6.31489e-28	1.68554	0.5	0.116	1.28394e-23	MHB.1	gas7a
zfhx41	2.88937e-27	1.37903	0.941	0.608	5.87466e-23	MHB.1	zfhx4
foxp41	4.53152e-27	1.24668	0.971	0.737	9.21349e-23	MHB.1	foxp4
tenm41	1.45015e-26	1.40384	0.931	0.575	2.94845e-22	MHB.1	tenm4
il17rd	1.7607e-26	1.74991	0.775	0.328	3.57986e-22	MHB.1	il17rd
CABZ01041610.1	2.86127e-26	1.21989	0.167	0.012	5.81754e-22	MHB.1	CABZ01041610.1
efna5b	1.37745e-25	1.37083	0.167	0.013	2.80062e-21	MHB.1	efna5b
kif5c1	7.17031e-25	1.76849	0.333	0.059	1.45787e-20	MHB.1	kif5c
prom1b	8.71814e-25	1.45835	0.186	0.017	1.77257e-20	MHB.1	prom1b
mab21l21	9.30555e-25	1.808	0.186	0.017	1.89201e-20	MHB.1	mab21l2
znrf31	6.32898e-24	1.2947	0.951	0.7	1.28681e-19	MHB.1	znrf3
ptprnb2	6.39878e-23	1.55282	0.686	0.256	1.301e-18	MHB.1	ptprnb
efna3b1	2.31676e-22	1.58844	0.686	0.275	4.71044e-18	MHB.1	efna3b
rfx42	6.60403e-22	1.16407	0.902	0.44	1.34273e-17	MHB.1	rfx4
tle3b	8.09269e-20	1.39942	0.569	0.195	1.64541e-15	MHB.1	tle3b
ptprn22	1.86175e-19	1.20347	0.745	0.327	3.78532e-15	MHB.1	ptprn2
nova22	3.39026e-19	0.886561	1	0.725	6.89308e-15	MHB.1	nova2
gfap2	6.72183e-19	1.29238	0.627	0.244	1.36668e-14	MHB.1	gfap
pvalb61	7.2558e-19	1.64731	0.294	0.06	1.47525e-14	MHB.1	pvalb6
celsr1b2	1.36782e-18	1.25142	0.784	0.37	2.78106e-14	MHB.1	celsr1b
klhl14	4.08797e-18	1.27192	0.118	0.009	8.31165e-14	MHB.1	klhl14
mex3b2	9.57662e-18	1.2951	0.735	0.357	1.94712e-13	MHB.1	mex3b
csf2rb	7.34893e-17	1.18384	0.137	0.014	1.49418e-12	MHB.1	csf2rb
pou3f3b2	1.19777e-16	1.35019	0.49	0.167	2.4353e-12	MHB.1	pou3f3b
sb:cb812	1.26718e-16	1.28723	0.716	0.371	2.57643e-12	MHB.1	sb:cb81
negr12	5.2118e-16	1.21523	0.784	0.418	1.05966e-11	MHB.1	negr1
igdcc3	6.31854e-16	1.46657	0.314	0.078	1.28468e-11	MHB.1	igdcc3
tmem108	6.96466e-16	1.20397	0.686	0.329	1.41606e-11	MHB.1	tmem108
igsf9a	7.81531e-16	1.34366	0.765	0.431	1.58901e-11	MHB.1	igsf9a
chd4b1	3.66514e-15	0.885764	0.951	0.773	7.45196e-11	MHB.1	chd4b
her3	4.05209e-15	1.71583	0.176	0.028	8.23872e-11	MHB.1	her3
RNF224	5.64554e-15	1.22749	0.225	0.045	1.14785e-10	MHB.1	RNF224
serinc4	6.6273e-15	1.37467	0.127	0.014	1.34746e-10	MHB.1	serinc4
adgrv12	8.04066e-15	1.05548	0.853	0.543	1.63483e-10	MHB.1	adgrv1
mdka2	8.78863e-15	0.934225	0.853	0.469	1.7869e-10	MHB.1	mdka
si:dkey-280e21.3	1.17096e-14	1.08079	0.216	0.041	2.38081e-10	MHB.1	si:dkey-280e21.3
si:dkey-246i14.3	1.5102e-14	1.46223	0.176	0.029	3.07055e-10	MHB.1	si:dkey-246i14.3
ptprna2	1.74626e-14	0.993437	0.676	0.306	3.55049e-10	MHB.1	ptprna
crb2a2	2.39975e-14	0.961166	0.804	0.429	4.87918e-10	MHB.1	crb2a
sox21a1	2.65392e-14	1.46081	0.255	0.059	5.39595e-10	MHB.1	sox21a
pcdh192	2.74936e-14	0.990088	0.853	0.542	5.59001e-10	MHB.1	pcdh19
amot1	3.08876e-14	0.906221	0.853	0.52	6.28006e-10	MHB.1	amot
2023-09-03	3.0935e-14	1.16995	0.157	0.023	6.2897e-10	MHB.1	2023-09-03
col18a1a	3.59828e-14	0.950619	0.863	0.548	7.31602e-10	MHB.1	col18a1a
polrmt	3.60017e-14	1.71936	0.431	0.16	7.31986e-10	MHB.1	polrmt
pde4bb	4.44178e-14	1.55374	0.48	0.198	9.03102e-10	MHB.1	pde4bb
msi12	6.01532e-14	0.896949	0.882	0.483	1.22303e-09	MHB.1	msi1
abcb52	7.00925e-14	1.32198	0.539	0.217	1.42512e-09	MHB.1	abcb5
arf3a	8.28627e-14	0.92684	0.108	0.011	1.68477e-09	MHB.1	arf3a
blmh2	1.04566e-13	0.939056	0.892	0.59	2.12603e-09	MHB.1	blmh
ncam1a2	1.9833e-13	0.83732	0.882	0.51	4.03244e-09	MHB.1	ncam1a
mbd3b2	2.37053e-13	1.00678	0.765	0.425	4.81977e-09	MHB.1	mbd3b
her11	2.82964e-13	1.45114	0.167	0.028	5.75321e-09	MHB.1	her11
mllt102	3.17261e-13	0.80892	0.941	0.724	6.45055e-09	MHB.1	mllt10
gnai3	5.66944e-13	1.2351	0.225	0.051	1.15271e-08	MHB.1	gnai3
gli2a	7.27289e-13	0.752923	0.961	0.78	1.47872e-08	MHB.1	gli2a
otx2b1	1.36263e-12	1.12183	0.167	0.03	2.77051e-08	MHB.1	otx2b
gdf111	1.60789e-12	1.29668	0.5	0.211	3.26916e-08	MHB.1	gdf11
wnt3a	2.40425e-12	1.72293	0.265	0.072	4.88832e-08	MHB.1	wnt3a
plxna1a1	2.42624e-12	1.04353	0.794	0.502	4.93303e-08	MHB.1	plxna1a
si:ch211-207i1.22	2.83651e-12	1.11905	0.471	0.185	5.76718e-08	MHB.1	si:ch211-207i1.2
tet22	2.91694e-12	0.953506	0.784	0.484	5.93073e-08	MHB.1	tet2
tet32	3.30384e-12	0.774522	0.873	0.575	6.71738e-08	MHB.1	tet3
cachd11	4.44408e-12	0.92442	0.873	0.644	9.03571e-08	MHB.1	cachd1
wls	6.12608e-12	1.36482	0.539	0.259	1.24555e-07	MHB.1	wls
zgc:101100	7.90048e-12	0.831432	0.108	0.013	1.60633e-07	MHB.1	zgc:101100
SAMD51	9.50095e-12	1.22864	0.245	0.064	1.93173e-07	MHB.1	SAMD5
map7d1a1	1.02341e-11	0.950363	0.765	0.459	2.0808e-07	MHB.1	map7d1a
pax2b	1.15779e-11	1.14333	0.245	0.064	2.35402e-07	MHB.1	pax2b
SIPA11	1.28969e-11	1.23351	0.343	0.114	2.62221e-07	MHB.1	SIPA1
cep131	1.36173e-11	0.924493	0.627	0.308	2.76866e-07	MHB.1	cep131
nyap2b	1.42724e-11	1.15429	0.157	0.029	2.90186e-07	MHB.1	nyap2b
flrt31	1.51189e-11	0.989462	0.549	0.252	3.07398e-07	MHB.1	flrt3
tmem472	2.19903e-11	1.06514	0.451	0.178	4.47106e-07	MHB.1	tmem47
pacsin1b1	3.28792e-11	0.996399	0.206	0.048	6.685e-07	MHB.1	pacsin1b
gli31	3.61432e-11	0.886395	0.873	0.771	7.34864e-07	MHB.1	gli3
emc2	4.60379e-11	1.13212	0.618	0.34	9.36042e-07	MHB.1	emc2
plce11	8.31144e-11	1.25035	0.471	0.21	1.68988e-06	MHB.1	plce1
hs3st3b1b2	8.50162e-11	0.792151	0.667	0.329	1.72855e-06	MHB.1	hs3st3b1b
otx2a1	8.78342e-11	1.14341	0.196	0.046	1.78584e-06	MHB.1	otx2a
chmp6b1	8.8844e-11	1.103	0.48	0.206	1.80638e-06	MHB.1	chmp6b
col4a6	1.16109e-10	0.79895	0.833	0.542	2.36072e-06	MHB.1	col4a6
adgrl3.11	1.55611e-10	1.25139	0.48	0.214	3.16388e-06	MHB.1	adgrl3.1
CU459056.11	1.69843e-10	1.12086	0.559	0.289	3.45324e-06	MHB.1	CU459056.1
si:ch211-117k10.3	2.43844e-10	0.978123	0.206	0.052	4.95783e-06	MHB.1	si:ch211-117k10.3
crb12	3.29932e-10	1.32013	0.471	0.22	6.70819e-06	MHB.1	crb1
nrxn3a2	4.83562e-10	1.49739	0.333	0.122	9.83179e-06	MHB.1	nrxn3a
zgc:771581	5.71063e-10	1.03902	0.667	0.385	1.16109e-05	MHB.1	zgc:77158
dock31	9.75988e-10	1.15747	0.343	0.13	1.98438e-05	MHB.1	dock3
nr1d2a	1.26897e-09	1.08079	0.284	0.095	2.58007e-05	MHB.1	nr1d2a
gpr158a	1.50805e-09	0.905786	0.118	0.02	3.06616e-05	MHB.1	gpr158a
phc2b1	1.85805e-09	1.01591	0.294	0.101	3.77779e-05	MHB.1	phc2b
dmbx1b1	1.91085e-09	0.973131	0.108	0.017	3.88513e-05	MHB.1	dmbx1b
hephl1a	1.94195e-09	0.996677	0.441	0.193	3.94838e-05	MHB.1	hephl1a
pvrl2l2	2.86561e-09	0.581369	0.863	0.535	5.82636e-05	MHB.1	pvrl2l
pou3f2a2	2.95675e-09	1.06997	0.186	0.048	6.01167e-05	MHB.1	pou3f2a
arhgap21a2	3.20644e-09	1.0054	0.471	0.228	6.51934e-05	MHB.1	arhgap21a
tmtc2a	3.25801e-09	1.13616	0.167	0.04	6.62419e-05	MHB.1	tmtc2a
her8a	5.14226e-09	0.818605	0.559	0.28	0.000104552	MHB.1	her8a
gclc	5.58729e-09	1.05363	0.353	0.143	0.000113601	MHB.1	gclc
cldn5a2	6.22669e-09	0.714677	0.735	0.422	0.000126601	MHB.1	cldn5a
efna5a	6.98877e-09	0.920287	0.647	0.4	0.000142096	MHB.1	efna5a
nav2b	8.08282e-09	0.751816	0.647	0.373	0.00016434	MHB.1	nav2b
plp1a2	8.40138e-09	0.627694	0.569	0.274	0.000170817	MHB.1	plp1a
dock11	1.09178e-08	1.0263	0.382	0.165	0.000221981	MHB.1	dock11
fzd10	1.18269e-08	1.10945	0.314	0.122	0.000240464	MHB.1	fzd10
c4b2	1.22314e-08	1.09518	0.392	0.17	0.000248688	MHB.1	c4b
eif3ea	1.52459e-08	0.915831	0.696	0.459	0.00030998	MHB.1	eif3ea
plagl22	1.56704e-08	0.74629	0.784	0.606	0.000318611	MHB.1	plagl2
srgap1a1	2.22913e-08	0.717871	0.804	0.546	0.000453226	MHB.1	srgap1a
fzd3a2	2.49054e-08	0.78922	0.657	0.389	0.000506377	MHB.1	fzd3a
fat3a2	3.425e-08	0.583095	0.833	0.525	0.000696372	MHB.1	fat3a
FQ311928.1	3.52934e-08	1.35527	0.304	0.122	0.000717586	MHB.1	FQ311928.1
phgdh1	4.92763e-08	0.761703	0.451	0.211	0.00100188	MHB.1	phgdh
sept9b	5.20885e-08	1.20708	0.275	0.103	0.00105906	MHB.1	sept9b
skia2	5.39305e-08	0.643335	0.853	0.581	0.00109652	MHB.1	skia
scube21	6.20847e-08	0.809666	0.52	0.271	0.00126231	MHB.1	scube2
tiam2a	6.38328e-08	0.723844	0.833	0.671	0.00129785	MHB.1	tiam2a
efna2a2	6.66114e-08	0.967845	0.686	0.449	0.00135434	MHB.1	efna2a
srgap31	6.99061e-08	0.757367	0.667	0.403	0.00142133	MHB.1	srgap3
rnd1b2	7.44845e-08	0.787928	0.441	0.207	0.00151442	MHB.1	rnd1b
grwd1	8.63876e-08	0.891337	0.51	0.275	0.00175643	MHB.1	grwd1
ldb2b1	9.01253e-08	1.06559	0.255	0.092	0.00183243	MHB.1	ldb2b
chl1b2	9.51607e-08	1.60982	0.324	0.137	0.00193481	MHB.1	chl1b
si:ch211-286o17.12	9.69106e-08	0.852009	0.49	0.249	0.00197039	MHB.1	si:ch211-286o17.1
tnrc6c21	1.08612e-07	0.947113	0.235	0.081	0.0022083	MHB.1	tnrc6c2
zgc:109889	1.09779e-07	1.08079	0.304	0.126	0.00223203	MHB.1	zgc:109889
arvcfb2	1.09828e-07	0.657365	0.765	0.491	0.00223302	MHB.1	arvcfb
mat2aa	1.22586e-07	0.896305	0.598	0.364	0.00249242	MHB.1	mat2aa
celf5a	1.2808e-07	1.04681	0.216	0.07	0.00260413	MHB.1	celf5a
ttf1	1.34882e-07	0.997148	0.412	0.203	0.00274243	MHB.1	ttf1
arid5b	1.45386e-07	0.92474	0.471	0.242	0.00295599	MHB.1	arid5b
fnbp1a	1.49068e-07	1.04211	0.167	0.047	0.00303086	MHB.1	fnbp1a
jag2b2	1.53239e-07	0.543214	0.951	0.795	0.00311566	MHB.1	jag2b
cbx7a1	1.54243e-07	1.05763	0.549	0.334	0.00313607	MHB.1	cbx7a
hif1an	1.61472e-07	1.0707	0.363	0.166	0.00328305	MHB.1	hif1an
plch12	1.72935e-07	0.618949	0.755	0.467	0.00351612	MHB.1	plch1
arhgef10la1	2.06633e-07	0.992811	0.549	0.306	0.00420126	MHB.1	arhgef10la
zgc:1748881	2.08398e-07	1.03193	0.343	0.149	0.00423714	MHB.1	zgc:174888
si:dkey-112m2.1	2.0905e-07	1.36724	0.176	0.052	0.0042504	MHB.1	si:dkey-112m2.1
st3gal2	2.73641e-07	0.969589	0.167	0.048	0.00556367	MHB.1	st3gal2
ptpn61	2.79435e-07	0.877179	0.353	0.158	0.00568146	MHB.1	ptpn6
aldocb	2.96129e-07	1.19359	0.225	0.081	0.0060209	MHB.1	aldocb
FO704750.1	2.9971e-07	0.951198	0.314	0.134	0.0060937	MHB.1	FO704750.1
mpp5a1	3.19442e-07	0.670057	0.716	0.458	0.00649489	MHB.1	mpp5a
trim2b	3.3151e-07	1.02747	0.167	0.049	0.00674026	MHB.1	trim2b
zbtb16a2	3.67328e-07	0.445114	0.98	0.844	0.00746852	MHB.1	zbtb16a
insrb1	4.47126e-07	0.437047	0.922	0.848	0.00909097	MHB.1	insrb
nhsl1b	5.11022e-07	0.632331	0.765	0.569	0.0103901	MHB.1	nhsl1b
pou2f2a.1	5.76679e-07	1.06202	0.49	0.275	0.011725	MHB.1	pou2f2a.1
acsl3b1	6.65304e-07	0.808874	0.304	0.128	0.013527	MHB.1	acsl3b
BX284638.22	6.71816e-07	0.753459	0.608	0.383	0.0136594	MHB.1	BX284638.2
FQ311908.11	7.72964e-07	1.00528	0.245	0.094	0.0157159	MHB.1	FQ311908.1
ror11	7.84995e-07	0.812749	0.549	0.312	0.0159605	MHB.1	ror1
rspo2	8.4417e-07	0.908738	0.314	0.138	0.0171637	MHB.1	rspo2
cntfr2	8.63433e-07	0.328693	0.951	0.673	0.0175553	MHB.1	cntfr
stox2b2	8.64776e-07	0.754778	0.667	0.462	0.0175826	MHB.1	stox2b
hook2	9.81702e-07	0.955985	0.186	0.061	0.01996	MHB.1	hook2
inavaa	9.89272e-07	0.69588	0.206	0.07	0.0201139	MHB.1	inavaa
zeb1b1	1.08847e-06	0.59608	0.784	0.572	0.0221309	MHB.1	zeb1b
sox19b1	1.10062e-06	0.915911	0.225	0.083	0.0223777	MHB.1	sox19b
eml11	1.10172e-06	1.11222	0.235	0.09	0.0224002	MHB.1	eml1
bcor1	1.16652e-06	0.790482	0.353	0.163	0.0237177	MHB.1	bcor
prim22	1.25204e-06	0.67234	0.627	0.389	0.0254564	MHB.1	prim2
raly	1.31338e-06	1.34734	0.167	0.053	0.0267037	MHB.1	raly
lrwd1	1.72019e-06	0.893664	0.206	0.074	0.0349749	MHB.1	lrwd1
ftsj1	2.1414e-06	0.78113	0.108	0.025	0.043539	MHB.1	ftsj1
atxn1a	2.42244e-06	0.728543	0.255	0.1	0.049253	MHB.1	atxn1a
endouc	2.43818e-06	0.766593	0.147	0.043	0.049573	MHB.1	endouc
samm50l	2.65748e-06	0.798657	0.147	0.043	0.054032	MHB.1	samm50l
rad51	2.6673e-06	0.679291	0.363	0.171	0.0542315	MHB.1	rad51
tox4	2.67659e-06	0.706485	0.647	0.438	0.0544204	MHB.1	tox
inhbb	2.68752e-06	1.14185	0.157	0.049	0.0546426	MHB.1	inhbb
si:dkey-195m11.81	2.70193e-06	0.574817	0.755	0.514	0.0549357	MHB.1	si:dkey-195m11.8
dgkh	2.84059e-06	0.790231	0.461	0.253	0.0577548	MHB.1	dgkh
elmsan1b	3.46966e-06	0.710375	0.784	0.67	0.0705451	MHB.1	elmsan1b
msh62	3.4785e-06	0.810847	0.48	0.278	0.0707248	MHB.1	msh6
klf12b1	3.70868e-06	1.11833	0.402	0.221	0.0754049	MHB.1	klf12b
rfx22	3.87232e-06	0.583355	0.775	0.6	0.078732	MHB.1	rfx2
xpc1	3.9583e-06	0.80701	0.373	0.186	0.0804802	MHB.1	xpc
nap1l11	4.25637e-06	0.613694	0.588	0.363	0.0865406	MHB.1	nap1l1
BX784025.1	4.31335e-06	0.838924	0.265	0.112	0.0876991	MHB.1	BX784025.1
mtrr	4.43347e-06	0.963815	0.314	0.15	0.0901413	MHB.1	mtrr
kcnd1	4.4633e-06	0.8183	0.176	0.06	0.0907478	MHB.1	kcnd1
zhx2a	4.55625e-06	0.746091	0.569	0.346	0.0926377	MHB.1	zhx2a
wdpcp	4.72865e-06	1.02794	0.196	0.072	0.096143	MHB.1	wdpcp
pkib	4.83359e-06	0.697788	0.108	0.027	0.0982765	MHB.1	pkib
dag12	5.15556e-06	0.451931	0.951	0.797	0.104823	MHB.1	dag1
nfil3	5.26589e-06	0.883836	0.137	0.041	0.107066	MHB.1	nfil3
epb41l5	5.68231e-06	0.661607	0.52	0.305	0.115533	MHB.1	epb41l5
plekha7b2	5.92171e-06	0.606439	0.461	0.253	0.1204	MHB.1	plekha7b
sipa1l1	6.01062e-06	0.575628	0.706	0.487	0.122208	MHB.1	sipa1l1
myo9aa	6.01514e-06	0.570557	0.657	0.428	0.1223	MHB.1	myo9aa
trit1	6.22335e-06	0.685917	0.627	0.43	0.126533	MHB.1	trit1
fam110b	6.74486e-06	0.824868	0.167	0.056	0.137136	MHB.1	fam110b
mycb	6.83949e-06	0.946765	0.333	0.167	0.139061	MHB.1	mycb
nr2f6a	7.02767e-06	0.757516	0.392	0.206	0.142887	MHB.1	nr2f6a
pisd	7.15683e-06	1.0479	0.265	0.119	0.145513	MHB.1	pisd
naa40.1	7.36758e-06	0.741075	0.343	0.165	0.149798	MHB.1	naa40.1
tox21	7.55142e-06	0.824251	0.5	0.307	0.153535	MHB.1	tox2
emilin1a	8.17221e-06	0.76125	0.118	0.032	0.166157	MHB.1	emilin1a
BX908388.3	8.38562e-06	1.07587	0.353	0.183	0.170496	MHB.1	BX908388.3
pdik1l	9.19001e-06	0.75951	0.461	0.264	0.186851	MHB.1	pdik1l
PKN2	9.66708e-06	0.715563	0.314	0.146	0.196551	MHB.1	PKN2
rpf2	1.05117e-05	0.805417	0.265	0.117	0.213723	MHB.1	rpf2
slc12a7a1	1.09252e-05	0.758364	0.627	0.446	0.222132	MHB.1	slc12a7a
ano8b	1.11393e-05	0.693534	0.157	0.052	0.226485	MHB.1	ano8b
efna2b	1.13506e-05	0.743446	0.118	0.032	0.230781	MHB.1	efna2b
adam15	1.14565e-05	0.931928	0.147	0.048	0.232935	MHB.1	adam15
ssuh2rs11	1.18978e-05	0.708429	0.471	0.272	0.241907	MHB.1	ssuh2rs1
larp4ab	1.21252e-05	0.733802	0.422	0.232	0.24653	MHB.1	larp4ab
zcchc7	1.26921e-05	0.635538	0.716	0.527	0.258056	MHB.1	zcchc7
ciao1	1.27617e-05	0.888542	0.186	0.069	0.259471	MHB.1	ciao1
sart3	1.28219e-05	0.639118	0.51	0.298	0.260695	MHB.1	sart3
macrod2	1.30729e-05	0.856345	0.402	0.228	0.265798	MHB.1	macrod2
parp1	1.39929e-05	0.752063	0.441	0.25	0.284503	MHB.1	parp1
msi2b	1.63537e-05	0.701008	0.745	0.575	0.332503	MHB.1	msi2b
cxadr2	1.71562e-05	0.606387	0.716	0.497	0.34882	MHB.1	cxadr
zfat1	1.76579e-05	0.892092	0.284	0.134	0.35902	MHB.1	zfat
si:ch73-386h18.12	2.1217e-05	0.748987	0.569	0.368	0.431384	MHB.1	si:ch73-386h18.1
myo5aa	2.26766e-05	0.798238	0.167	0.06	0.461061	MHB.1	myo5aa
pms21	2.43984e-05	0.88217	0.294	0.144	0.496069	MHB.1	pms2
hk2	2.45862e-05	0.817974	0.412	0.231	0.499887	MHB.1	hk2
celf21	2.49996e-05	0.747644	0.52	0.341	0.508291	MHB.1	celf2
kif5ba.1	2.65768e-05	0.815498	0.255	0.115	0.540359	MHB.1	kif5ba.1
ephb4b	2.6869e-05	0.751688	0.402	0.231	0.546301	MHB.1	ephb4b
s1pr2	2.69476e-05	0.722262	0.5	0.322	0.547899	MHB.1	s1pr2
morc3a	2.73916e-05	0.72499	0.225	0.095	0.556925	MHB.1	morc3a
celf3a2	2.83086e-05	0.622223	0.5	0.306	0.575571	MHB.1	celf3a
nop56	2.9033e-05	0.385906	0.863	0.661	0.590299	MHB.1	nop56
ormdl3	2.93041e-05	0.766308	0.147	0.05	0.59581	MHB.1	ormdl3
pax3b1	2.94352e-05	0.695801	0.147	0.049	0.598477	MHB.1	pax3b
pik3c2b1	2.96376e-05	0.437237	0.706	0.454	0.602592	MHB.1	pik3c2b
dennd5b	3.18841e-05	0.582147	0.539	0.326	0.648267	MHB.1	dennd5b
ssbp42	3.40516e-05	0.464819	0.735	0.532	0.692337	MHB.1	ssbp4
vdrb	3.53419e-05	0.625107	0.657	0.481	0.718572	MHB.1	vdrb
si:dkey-91i10.21	3.54405e-05	0.688474	0.147	0.05	0.720576	MHB.1	si:dkey-91i10.2
ctps1a	3.56636e-05	0.619308	0.765	0.61	0.725113	MHB.1	ctps1a
zfhx3	3.65275e-05	0.573339	0.549	0.341	0.742678	MHB.1	zfhx3
knop1	3.67554e-05	0.66229	0.529	0.336	0.747311	MHB.1	knop1
bop1	3.70566e-05	0.553252	0.706	0.502	0.753436	MHB.1	bop1
adka	3.74977e-05	0.513622	0.775	0.593	0.762404	MHB.1	adka
met	3.92224e-05	1.2147	0.275	0.137	0.79747	MHB.1	met
kif21b	4.04755e-05	0.733802	0.353	0.189	0.822947	MHB.1	kif21b
cspg5a1	4.07645e-05	0.555462	0.451	0.254	0.828823	MHB.1	cspg5a
ctdp12	4.11354e-05	0.43726	0.814	0.703	0.836365	MHB.1	ctdp1
mrtfbb	4.15389e-05	0.983432	0.284	0.139	0.84457	MHB.1	mrtfbb
emid1	4.16839e-05	0.801441	0.186	0.072	0.847518	MHB.1	emid1
kcnab2a1	4.57742e-05	0.717591	0.324	0.167	0.930681	MHB.1	kcnab2a
fgf6a1	4.69389e-05	0.780768	0.157	0.057	0.954362	MHB.1	fgf6a
pold1	4.76072e-05	0.717225	0.206	0.086	0.967949	MHB.1	pold1
saal11	4.85943e-05	0.795896	0.157	0.057	0.988018	MHB.1	saal1
pigt	5.15011e-05	0.63767	0.245	0.11	1	MHB.1	pigt
pax7b1	5.26344e-05	0.940244	0.186	0.075	1	MHB.1	pax7b
wnt111	5.35313e-05	0.597286	0.373	0.2	1	MHB.1	wnt11
tor3a	5.45528e-05	0.540431	0.343	0.178	1	MHB.1	tor3a
mrpl33	5.49707e-05	0.890863	0.206	0.089	1	MHB.1	mrpl33
lfng2	5.54826e-05	0.508497	0.696	0.495	1	MHB.1	lfng
porb	5.55788e-05	0.636803	0.108	0.031	1	MHB.1	porb
aff21	5.62298e-05	0.750504	0.549	0.382	1	MHB.1	aff2
eif4a1b	5.77505e-05	0.708823	0.284	0.138	1	MHB.1	eif4a1b
tp53i11b	5.78296e-05	0.714339	0.235	0.105	1	MHB.1	tp53i11b
fntb	5.85545e-05	0.651989	0.314	0.159	1	MHB.1	fntb
angptl41	5.85942e-05	0.488624	0.569	0.352	1	MHB.1	angptl4
tenm3	5.8866e-05	0.357066	0.853	0.677	1	MHB.1	tenm3
hirip31	6.00166e-05	0.568271	0.294	0.143	1	MHB.1	hirip3
si:ch211-137a8.41	6.04349e-05	0.673931	0.402	0.232	1	MHB.1	si:ch211-137a8.4
mdc1	6.16714e-05	0.960698	0.216	0.096	1	MHB.1	mdc1
RUNDC1	6.1796e-05	0.760911	0.147	0.052	1	MHB.1	RUNDC1
ptprua	6.26207e-05	1.23874	0.284	0.144	1	MHB.1	ptprua
wnt7ba	6.27194e-05	0.911965	0.137	0.048	1	MHB.1	wnt7ba
sdc41	6.36796e-05	0.638768	0.735	0.587	1	MHB.1	sdc4
srpk1b	6.93153e-05	0.726342	0.441	0.263	1	MHB.1	srpk1b
ccnt2a	6.94555e-05	0.745437	0.314	0.163	1	MHB.1	ccnt2a
nudt14	7.43165e-05	0.696876	0.284	0.138	1	MHB.1	nudt14
ldb2a	7.57235e-05	0.729388	0.304	0.154	1	MHB.1	ldb2a
acsl22	7.73877e-05	0.491424	0.48	0.28	1	MHB.1	acsl2
gtpbp61	8.00838e-05	0.737748	0.176	0.07	1	MHB.1	gtpbp6
apcdd1l	8.10396e-05	0.962324	0.196	0.083	1	MHB.1	apcdd1l
qki22	8.12831e-05	0.624831	0.549	0.349	1	MHB.1	qki2
abi2a	8.45853e-05	0.577508	0.353	0.187	1	MHB.1	abi2a
si:dkey-154b15.1	8.56402e-05	0.579963	0.471	0.277	1	MHB.1	si:dkey-154b15.1
nfe2l1a	8.66369e-05	0.750402	0.275	0.137	1	MHB.1	nfe2l1a
jpt2	8.76351e-05	0.678504	0.265	0.127	1	MHB.1	jpt2
caskin1	8.84898e-05	0.393348	0.422	0.241	1	MHB.1	caskin1
fhdc12	9.30079e-05	0.636729	0.363	0.197	1	MHB.1	fhdc1
nanos1	9.56654e-05	0.767956	0.176	0.071	1	MHB.1	nanos1
MAP3K13	9.6196e-05	0.584696	0.216	0.093	1	MHB.1	MAP3K13
wdr18	9.68573e-05	0.576863	0.706	0.527	1	MHB.1	wdr18
ccne22	9.80069e-05	0.914478	0.461	0.289	1	MHB.1	ccne2
zfr2	0.000102274	0.714376	0.333	0.176	1	MHB.1	zfr2
cyth1b1	0.000103322	0.718959	0.549	0.37	1	MHB.1	cyth1b
jak11	0.000107665	0.561831	0.784	0.689	1	MHB.1	jak1
heatr3	0.000107728	0.703103	0.294	0.15	1	MHB.1	heatr3
adam8b1	0.000121584	0.898171	0.147	0.054	1	MHB.1	adam8b
slc1a3a	0.000124767	0.649987	0.471	0.283	1	MHB.1	slc1a3a
timm23a	0.000130681	0.745138	0.147	0.055	1	MHB.1	timm23a
gins2	0.000135239	0.733198	0.167	0.066	1	MHB.1	gins2
ddx10	0.000136205	0.66377	0.451	0.272	1	MHB.1	ddx10
ip6k2b	0.000139446	0.671757	0.343	0.183	1	MHB.1	ip6k2b
si:ch211-222l21.11	0.000142904	0.313004	0.892	0.802	1	MHB.1	si:ch211-222l21.1
col4a5	0.00014523	0.49823	0.49	0.302	1	MHB.1	col4a5
atr	0.000149412	0.681058	0.265	0.131	1	MHB.1	atr
exosc5	0.000152789	0.620272	0.304	0.158	1	MHB.1	exosc5
mycla	0.000153937	0.585264	0.422	0.257	1	MHB.1	mycla
nasp1	0.000157413	0.691703	0.451	0.274	1	MHB.1	nasp
pabpn1	0.000160047	0.51619	0.765	0.59	1	MHB.1	pabpn1
pwp2h	0.00016151	0.647798	0.637	0.476	1	MHB.1	pwp2h
gramd4b	0.0001658	0.790114	0.206	0.093	1	MHB.1	gramd4b
cby11	0.000167406	0.769023	0.196	0.086	1	MHB.1	cby1
dhrsx	0.000168591	0.745623	0.147	0.056	1	MHB.1	dhrsx
cyfip21	0.000169331	0.731672	0.265	0.133	1	MHB.1	cyfip2
gpn1	0.000172766	0.785668	0.225	0.107	1	MHB.1	gpn1
BX248108.1	0.00017937	0.815498	0.235	0.112	1	MHB.1	BX248108.1
rorca	0.000184023	0.572064	0.147	0.055	1	MHB.1	rorca
cbll1	0.000185545	0.647602	0.118	0.039	1	MHB.1	cbll1
adssl	0.000188244	0.609733	0.255	0.124	1	MHB.1	adssl
dhrs13a.3	0.000189971	0.580637	0.225	0.104	1	MHB.1	dhrs13a.3
rnf34b	0.000194637	0.718394	0.108	0.035	1	MHB.1	rnf34b
plk41	0.000199621	0.654672	0.294	0.154	1	MHB.1	plk4
si:ch211-216b21.2	0.000207831	0.816902	0.196	0.087	1	MHB.1	si:ch211-216b21.2
zgc:1107961	0.00021201	0.697068	0.461	0.308	1	MHB.1	zgc:110796
cldnb	0.00021423	0.455903	0.206	0.091	1	MHB.1	cldnb
rev1	0.000219765	0.688474	0.176	0.074	1	MHB.1	rev1
xxylt11	0.000222024	0.593335	0.304	0.159	1	MHB.1	xxylt1
bbs5	0.000224551	0.693534	0.137	0.051	1	MHB.1	bbs5
tprn1	0.000228286	0.840879	0.275	0.144	1	MHB.1	tprn
dvl3b	0.000231126	1.10157	0.265	0.14	1	MHB.1	dvl3b
mier1a1	0.000233976	0.670507	0.324	0.177	1	MHB.1	mier1a
cux1a	0.000242856	0.381307	0.598	0.406	1	MHB.1	cux1a
ildr22	0.000266317	0.388842	0.657	0.46	1	MHB.1	ildr2
phf20b1	0.000267872	0.522232	0.471	0.298	1	MHB.1	phf20b
chrm4a	0.000271142	0.508374	0.265	0.131	1	MHB.1	chrm4a
pfas	0.000277966	0.846476	0.255	0.132	1	MHB.1	pfas
pcdh18b	0.000281008	0.688474	0.137	0.052	1	MHB.1	pcdh18b
tra2b	0.000285481	0.661335	0.392	0.242	1	MHB.1	tra2b
si:dkey-74k8.3	0.000294535	0.587085	0.118	0.041	1	MHB.1	si:dkey-74k8.3
setdb1b1	0.000301329	0.584238	0.373	0.218	1	MHB.1	setdb1b
slc7a3b	0.000302664	0.527754	0.461	0.297	1	MHB.1	slc7a3b
ppig	0.000307775	0.458572	0.569	0.385	1	MHB.1	ppig
carm11	0.000309444	0.593617	0.529	0.381	1	MHB.1	carm1
lifra	0.000323649	0.595818	0.422	0.262	1	MHB.1	lifra
rfc1	0.000335682	0.523265	0.343	0.19	1	MHB.1	rfc1
atf4b	0.000337253	0.563661	0.588	0.447	1	MHB.1	atf4b
cdc123	0.000341155	0.732356	0.167	0.071	1	MHB.1	cdc123
map2k2b	0.000343008	0.663148	0.127	0.047	1	MHB.1	map2k2b
map3k5	0.0003474	0.65758	0.127	0.047	1	MHB.1	map3k5
epb41a2	0.000350533	0.306996	0.627	0.41	1	MHB.1	epb41a
pmpca	0.000371821	0.753271	0.235	0.119	1	MHB.1	pmpca
efnb2b1	0.000373205	0.541821	0.608	0.437	1	MHB.1	efnb2b
map3k22	0.000393547	1.01068	0.216	0.107	1	MHB.1	map3k22
znf576.2	0.00039433	0.598837	0.196	0.089	1	MHB.1	znf576.2
mapk14a	0.000398279	0.481754	0.49	0.315	1	MHB.1	mapk14a
spata131	0.000399699	0.631844	0.275	0.144	1	MHB.1	spata13
haus4	0.000401021	0.697309	0.176	0.078	1	MHB.1	haus4
zfpm2a	0.000401053	0.970186	0.216	0.106	1	MHB.1	zfpm2a
tmem44	0.000405012	0.879372	0.127	0.048	1	MHB.1	tmem44
dph1	0.000415003	0.686934	0.431	0.293	1	MHB.1	dph1
gsk3aa	0.000425491	0.551458	0.176	0.076	1	MHB.1	gsk3aa
bcdin3d	0.000437131	0.529101	0.108	0.037	1	MHB.1	bcdin3d
tfap41	0.000438802	0.505007	0.696	0.543	1	MHB.1	tfap4
BX663503.3	0.000447651	0.40447	0.127	0.047	1	MHB.1	BX663503.3
umps	0.000451511	0.709317	0.186	0.084	1	MHB.1	umps
pla2g12a	0.000456826	0.619279	0.137	0.053	1	MHB.1	pla2g12a
zgc:1534261	0.000456853	0.820633	0.118	0.043	1	MHB.1	zgc:153426
dtx4a2	0.000458453	0.603933	0.51	0.351	1	MHB.1	dtx4a
znf341	0.000459061	0.831824	0.137	0.054	1	MHB.1	znf341
slc29a1a	0.000461544	0.564711	0.382	0.229	1	MHB.1	slc29a1a
syne1b1	0.000463465	0.548919	0.275	0.147	1	MHB.1	syne1b
gart1	0.000471493	0.591742	0.265	0.138	1	MHB.1	gart
rpe	0.000482603	0.542168	0.127	0.048	1	MHB.1	rpe
znf106b	0.000486727	0.591454	0.471	0.313	1	MHB.1	znf106b
cbx1a1	0.000494692	0.544897	0.529	0.363	1	MHB.1	cbx1a
ccser2a	0.000498865	0.630057	0.127	0.048	1	MHB.1	ccser2a
ctdspl2a1	0.000500246	0.716543	0.373	0.225	1	MHB.1	ctdspl2a
oxct1a	0.000509249	0.600269	0.363	0.215	1	MHB.1	oxct1a
si:dkey-102m7.31	0.000552414	0.466519	0.559	0.384	1	MHB.1	si:dkey-102m7.3
larp7	0.000552883	0.792999	0.216	0.106	1	MHB.1	larp7
fbxo161	0.000563163	0.634488	0.324	0.185	1	MHB.1	fbxo16
btbd6b	0.000564077	0.678504	0.235	0.12	1	MHB.1	btbd6b
si:ch211-51e12.7	0.000592526	0.531314	0.48	0.323	1	MHB.1	si:ch211-51e12.7
mrpl20	0.000597564	0.613792	0.127	0.049	1	MHB.1	mrpl20
BX510934.1	0.000602372	0.558413	0.108	0.038	1	MHB.1	BX510934.1
pspc1	0.000605755	0.425363	0.627	0.448	1	MHB.1	pspc1
tomm20a	0.000619099	0.679016	0.216	0.107	1	MHB.1	tomm20a
si:dkey-276j7.11	0.000620708	0.694889	0.176	0.079	1	MHB.1	si:dkey-276j7.1
lmx1ba	0.000621983	0.84782	0.225	0.114	1	MHB.1	lmx1ba
h3f3b.11	0.000625185	0.473498	0.49	0.32	1	MHB.1	h3f3b.1
hprt1	0.000628456	0.717387	0.245	0.13	1	MHB.1	hprt1
trim8b	0.000643368	0.529951	0.324	0.184	1	MHB.1	trim8b
ogt.1.1	0.00064605	0.501154	0.637	0.488	1	MHB.1	ogt.1.1
mibp2	0.000647593	0.538621	0.284	0.153	1	MHB.1	mibp2
taar10	0.000666237	0.757402	0.304	0.177	1	MHB.1	taar10
rhpn11	0.000676139	0.60593	0.216	0.106	1	MHB.1	rhpn1
afdna	0.000682899	0.280343	0.853	0.739	1	MHB.1	afdna
plxdc21	0.000687101	0.585233	0.559	0.387	1	MHB.1	plxdc2
ripor1	0.000690298	0.363968	0.784	0.648	1	MHB.1	ripor1
cdh21	0.000692591	0.326637	0.951	0.795	1	MHB.1	cdh2
rfx31	0.000701768	0.486	0.333	0.188	1	MHB.1	rfx3
camk2g1	0.000711408	0.537928	0.618	0.462	1	MHB.1	camk2g1
hist1h2a3	0.000713381	0.809421	0.147	0.062	1	MHB.1	hist1h2a3
immp2l1	0.000727037	0.757681	0.343	0.21	1	MHB.1	immp2l
thrab	0.000734031	0.645016	0.422	0.273	1	MHB.1	thrab
pola12	0.000741119	0.442544	0.647	0.469	1	MHB.1	pola1
fam210ab	0.000767713	0.719106	0.137	0.056	1	MHB.1	fam210ab
si:dkeyp-120h9.1	0.000779866	0.631189	0.275	0.152	1	MHB.1	si:dkeyp-120h9.1
tjap1	0.000796281	0.636851	0.412	0.266	1	MHB.1	tjap1
snu13b	0.000808971	0.616226	0.363	0.222	1	MHB.1	snu13b
surf6	0.000810577	0.606669	0.186	0.087	1	MHB.1	surf6
tctn2	0.000820759	0.728046	0.186	0.087	1	MHB.1	tctn2
paxip1	0.00084826	0.451704	0.353	0.205	1	MHB.1	paxip1
jarid2b2	0.000859713	0.42697	0.922	0.846	1	MHB.1	jarid2b
xpo7	0.000868888	0.536578	0.461	0.304	1	MHB.1	xpo7
mych	0.000871033	0.457702	0.529	0.354	1	MHB.1	mych
dyrk1aa	0.000877568	0.682564	0.108	0.039	1	MHB.1	dyrk1aa
wdr4	0.000878844	0.631989	0.186	0.087	1	MHB.1	wdr4
eri1	0.000881793	0.633085	0.167	0.075	1	MHB.1	eri1
phf6	0.000914386	0.653274	0.275	0.154	1	MHB.1	phf6
elmo3	0.000925198	0.543617	0.324	0.189	1	MHB.1	elmo3
tead1a1	0.000926758	0.459651	0.882	0.773	1	MHB.1	tead1a
dscc11	0.000936259	0.579321	0.255	0.135	1	MHB.1	dscc1
rfwd3	0.000939536	0.669399	0.186	0.089	1	MHB.1	rfwd3
zgc:194989	0.000944863	0.527968	0.333	0.193	1	MHB.1	zgc:194989
nup155	0.000945871	0.542404	0.235	0.121	1	MHB.1	nup155
nsl11	0.000952294	0.635652	0.196	0.095	1	MHB.1	nsl1
palld	0.000977743	0.46083	0.745	0.632	1	MHB.1	palld
kpna4	0.000992374	0.497673	0.343	0.202	1	MHB.1	kpna4
zgc:173709	0.000993373	0.653274	0.275	0.15	1	MHB.1	zgc:173709
ephb4a1	0.000995971	0.472946	0.637	0.482	1	MHB.1	ephb4a
ctbp2a	0.000998848	0.343192	0.686	0.534	1	MHB.1	ctbp2a
wasf3b2	0.000999636	0.417451	0.598	0.427	1	MHB.1	wasf3b
si:dkey-239h2.3	0.00100243	0.428078	0.647	0.497	1	MHB.1	si:dkey-239h2.3
afap1l1b	0.00100558	0.613792	0.118	0.045	1	MHB.1	afap1l1b
supt3h	0.00100763	0.410407	0.588	0.421	1	MHB.1	supt3h
auts2a1	0.00100963	0.38349	0.569	0.395	1	MHB.1	auts2a
rad54l	0.00100967	0.590825	0.157	0.069	1	MHB.1	rad54l
lpgat1	0.0010128	0.436141	0.51	0.348	1	MHB.1	lpgat1
imp3	0.00101445	0.610241	0.167	0.075	1	MHB.1	imp3
si:dkey-122a22.2	0.00101588	0.596698	0.118	0.045	1	MHB.1	si:dkey-122a22.2
tfr1b	0.00102311	0.598097	0.176	0.082	1	MHB.1	tfr1b
pcyox11	0.00102533	0.591897	0.157	0.069	1	MHB.1	pcyox1
lcmt1	0.00102742	0.652602	0.363	0.23	1	MHB.1	lcmt1
dennd1b	0.00103925	0.561321	0.304	0.174	1	MHB.1	dennd1b
atm	0.0010437	0.516931	0.461	0.314	1	MHB.1	atm
dnmt3bb.1	0.00105424	0.610241	0.137	0.057	1	MHB.1	dnmt3bb.1
si:dkey-108k21.19	0.00105802	0.641078	0.255	0.138	1	MHB.1	si:dkey-108k21.19
CU862020.11	0.00106034	0.659791	0.176	0.082	1	MHB.1	CU862020.1
ktn1	0.00106635	0.57155	0.5	0.345	1	MHB.1	ktn1
atp13a3	0.00107246	0.341721	0.539	0.349	1	MHB.1	atp13a3
pdgfaa.1	0.00107405	0.39618	0.167	0.074	1	MHB.1	pdgfaa.1
nxpe3	0.00108509	0.646734	0.157	0.07	1	MHB.1	nxpe3
fam234a	0.00109966	0.636133	0.108	0.04	1	MHB.1	fam234a
coq8b	0.00110475	0.674426	0.157	0.07	1	MHB.1	coq8b
cks1b	0.00113122	0.653667	0.176	0.083	1	MHB.1	cks1b
CU459186.5	0.00114097	0.682127	0.235	0.125	1	MHB.1	CU459186.5
celsr2	0.0011509	0.467161	0.265	0.142	1	MHB.1	celsr2
ipo111	0.00115149	0.343869	0.676	0.532	1	MHB.1	ipo11
rplp2l	0.00117162	0.311144	0.863	0.739	1	MHB.1	rplp2l
tnfrsf19	0.00117404	0.682353	0.333	0.206	1	MHB.1	tnfrsf19
srebf1	0.00117653	0.654672	0.275	0.153	1	MHB.1	srebf1
ankrd10b	0.00120751	0.622586	0.353	0.226	1	MHB.1	ankrd10b
ehmt1b1	0.00122106	0.426608	0.5	0.348	1	MHB.1	ehmt1b
chtf18	0.00123371	0.670253	0.324	0.192	1	MHB.1	chtf18
prkag2a	0.0012697	0.504907	0.206	0.101	1	MHB.1	prkag2a
si:ch211-66k16.271	0.00128041	0.673616	0.314	0.186	1	MHB.1	si:ch211-66k16.27
CU459186.4	0.00129339	0.550829	0.216	0.11	1	MHB.1	CU459186.4
map3k4	0.00130421	0.369216	0.588	0.426	1	MHB.1	map3k4
kbtbd8	0.0013083	0.63742	0.294	0.174	1	MHB.1	kbtbd8
boc	0.00131757	0.426111	0.833	0.716	1	MHB.1	boc
slc9a7	0.00132078	0.605058	0.137	0.058	1	MHB.1	slc9a7
setd2	0.00132476	0.388802	0.569	0.385	1	MHB.1	setd2
ankrd27	0.00136364	0.578291	0.108	0.041	1	MHB.1	ankrd27
gldc	0.00137323	0.584638	0.235	0.125	1	MHB.1	gldc
rad181	0.00138349	0.29214	0.461	0.29	1	MHB.1	rad18
pds5a	0.00139067	0.54117	0.559	0.417	1	MHB.1	pds5a
vasna	0.00139459	0.736716	0.167	0.078	1	MHB.1	vasna
rpl36	0.00141279	0.273016	0.794	0.664	1	MHB.1	rpl36
tdh	0.0014369	0.642634	0.275	0.158	1	MHB.1	tdh
rfc5	0.00146814	0.723836	0.255	0.142	1	MHB.1	rfc5
tdp1	0.00147346	0.530637	0.451	0.305	1	MHB.1	tdp1
tmem169a	0.00153298	0.698553	0.196	0.1	1	MHB.1	tmem169a
ddb2	0.00153726	0.536786	0.147	0.064	1	MHB.1	ddb2
cpsf6	0.00154323	0.384786	0.51	0.337	1	MHB.1	cpsf6
nenf	0.00158402	0.55001	0.186	0.09	1	MHB.1	nenf
eef1g	0.00164627	0.388502	0.667	0.553	1	MHB.1	eef1g
srsf7a	0.00165426	0.52092	0.343	0.211	1	MHB.1	srsf7a
clul1.1	0.00166987	0.45395	0.127	0.052	1	MHB.1	clul1.1
npm1a	0.00167426	0.54306	0.578	0.473	1	MHB.1	npm1a
pag11	0.00169436	0.685054	0.284	0.167	1	MHB.1	pag1
cpm	0.00169871	0.686921	0.235	0.127	1	MHB.1	cpm
sfxn1	0.00171453	0.494836	0.137	0.059	1	MHB.1	sfxn1
mast3b	0.00173838	0.658077	0.275	0.159	1	MHB.1	mast3b
pdgfaa	0.001749	0.771117	0.167	0.078	1	MHB.1	pdgfaa
dop1a	0.00175299	0.446025	0.137	0.059	1	MHB.1	dop1a
aacs	0.00176517	0.737307	0.186	0.092	1	MHB.1	aacs
fam168b1	0.00177065	0.536557	0.5	0.353	1	MHB.1	fam168b
mat2ab	0.00177147	0.54416	0.333	0.203	1	MHB.1	mat2ab
bud31	0.00177195	0.495259	0.284	0.162	1	MHB.1	bud31
txndc17	0.001787	0.700707	0.137	0.06	1	MHB.1	txndc17
prnprs3	0.00181698	0.47025	0.255	0.139	1	MHB.1	prnprs3
ranbp11	0.00182036	0.601983	0.363	0.23	1	MHB.1	ranbp1
syne2b1	0.00182787	0.50358	0.431	0.284	1	MHB.1	syne2b
trps12	0.00183258	0.342423	0.853	0.718	1	MHB.1	trps1
ccdc18	0.0018526	0.522464	0.304	0.18	1	MHB.1	ccdc18
slc4a72	0.00185937	0.399748	0.539	0.388	1	MHB.1	slc4a7
ttll71	0.00186577	0.657123	0.363	0.23	1	MHB.1	ttll7
zgc:154006	0.00189234	0.775198	0.137	0.061	1	MHB.1	zgc:154006
zgc:1586891	0.00189679	0.469854	0.275	0.153	1	MHB.1	zgc:158689
oat	0.00190796	0.517203	0.167	0.078	1	MHB.1	oat
rrp12	0.00191728	0.552439	0.422	0.286	1	MHB.1	rrp12
msh2	0.00197539	0.712045	0.196	0.101	1	MHB.1	msh2
grin2bb	0.00197756	0.596296	0.186	0.092	1	MHB.1	grin2bb
kcnk5a1	0.00198547	0.462345	0.225	0.118	1	MHB.1	kcnk5a
mocs3	0.00201968	0.655609	0.196	0.101	1	MHB.1	mocs3
kdsr	0.00204937	0.458074	0.225	0.118	1	MHB.1	kdsr
fra10ac1	0.00205956	0.670677	0.225	0.122	1	MHB.1	fra10ac1
meis1b	0.00206197	0.306391	0.765	0.594	1	MHB.1	meis1b
wdr53	0.00206419	0.551458	0.167	0.079	1	MHB.1	wdr53
dusp19b	0.00209817	0.602508	0.804	0.669	1	MHB.1	dusp19b
kdm6a	0.00209989	0.408628	0.716	0.616	1	MHB.1	kdm6a
zgc:56585	0.00210092	0.483964	0.118	0.048	1	MHB.1	zgc:56585
naa30	0.00211068	0.54674	0.343	0.217	1	MHB.1	naa30
creb5b	0.0021215	0.411192	0.451	0.305	1	MHB.1	creb5b
calcoco1a	0.00212404	0.754833	0.294	0.176	1	MHB.1	calcoco1a
sema7a	0.00212426	0.5995	0.137	0.06	1	MHB.1	sema7a
atad5b1	0.00214926	0.444198	0.314	0.185	1	MHB.1	atad5b
nt5dc3	0.00215954	0.494836	0.137	0.06	1	MHB.1	nt5dc3
znf11831	0.00224321	0.446204	0.52	0.369	1	MHB.1	znf1183
med28	0.00228522	0.48904	0.108	0.042	1	MHB.1	med28
ppa2	0.00229664	0.59897	0.216	0.115	1	MHB.1	ppa2
arhgap32a	0.00231138	0.773714	0.157	0.075	1	MHB.1	arhgap32a
suz12a	0.00232367	0.483078	0.353	0.22	1	MHB.1	suz12a
wbp1lb	0.00235255	0.787793	0.108	0.043	1	MHB.1	wbp1lb
[truncated: 21,328 more rows]

## Sheet: 4.HB13hpf_DEAB_all_clusters
gene	p_val	avg_log2FC	pct.1	pct.2	p_val_adj	cluster	gene
sox10	0	1.76762	0.8	0.009	0	NC.1	sox10
sox9b	5.85851e-257	1.45513	0.766	0.026	1.20123e-252	NC.1	sox9b
ednrab	9.97735e-234	0.967959	0.524	0.005	2.04576e-229	NC.1	ednrab
foxd3	1.27221e-192	1.08798	0.538	0.014	2.60855e-188	NC.1	foxd3
ets1	5.87561e-179	1.04344	0.579	0.022	1.20473e-174	NC.1	ets1
snai1b	2.42042e-175	2.67709	0.966	0.128	4.96283e-171	NC.1	snai1b
pdgfra	1.05535e-167	2.57258	0.938	0.122	2.1639e-163	NC.1	pdgfra
kcnab1a	8.01625e-148	3.38987	0.862	0.122	1.64365e-143	NC.1	kcnab1a
twist1b	1.56343e-130	0.704138	0.421	0.015	3.20565e-126	NC.1	twist1b
myo10l1	1.32585e-123	1.26865	0.531	0.037	2.71853e-119	NC.1	myo10l1
col15a1b	8.23477e-120	2.28	0.979	0.211	1.68846e-115	NC.1	col15a1b
prex2	8.9091e-120	2.92446	0.897	0.196	1.82672e-115	NC.1	prex2
tfap2a	8.50311e-118	1.56939	0.883	0.145	1.74348e-113	NC.1	tfap2a
slc1a3a	3.51541e-108	2.0976	0.897	0.209	7.20801e-104	NC.1	slc1a3a
sdk2b	3.46008e-95	1.48208	0.586	0.072	7.09455e-91	NC.1	sdk2b
itga9	3.2912e-93	2.34832	0.931	0.245	6.74828e-89	NC.1	itga9
thsd7aa	5.36974e-92	1.63889	0.6	0.08	1.10101e-87	NC.1	thsd7aa
sox6	4.73544e-91	2.51787	0.924	0.278	9.70954e-87	NC.1	sox6
sox5	1.17821e-87	2.3597	0.924	0.309	2.4158e-83	NC.1	sox5
gdf6a	1.1856e-84	0.694394	0.441	0.039	2.43096e-80	NC.1	gdf6a
pax3a	3.06397e-84	2.64874	0.952	0.356	6.28236e-80	NC.1	pax3a
cdh7a	2.49104e-78	1.5296	0.91	0.23	5.10762e-74	NC.1	cdh7a
cyth1b	5.14736e-75	2.09943	0.903	0.376	1.05542e-70	NC.1	cyth1b
kalrnb	5.33679e-73	0.789374	0.545	0.077	1.09425e-68	NC.1	kalrnb
gria1a	5.49542e-71	1.5166	0.579	0.096	1.12678e-66	NC.1	gria1a
klf7a	6.62958e-71	1.47531	0.731	0.162	1.35933e-66	NC.1	klf7a
col16a1	1.57093e-69	1.44414	0.697	0.16	3.22103e-65	NC.1	col16a1
atp1b3a	2.2638e-66	1.34292	0.834	0.255	4.6417e-62	NC.1	atp1b3a
stard13b	3.19999e-63	1.5618	0.738	0.199	6.56125e-59	NC.1	stard13b
foxo6b	6.93205e-62	0.86586	0.352	0.034	1.42135e-57	NC.1	foxo6b
traf4a	1.36852e-57	1.15209	0.717	0.179	2.80601e-53	NC.1	traf4a
tle3b	1.68488e-56	1.43076	0.924	0.435	3.45467e-52	NC.1	tle3b
mmp15b	1.19227e-54	1.119	0.807	0.243	2.44463e-50	NC.1	mmp15b
dlc1	1.40404e-54	1.21825	0.821	0.27	2.87885e-50	NC.1	dlc1
si:dkey-22o22.2	1.43376e-53	1.16529	0.662	0.158	2.93977e-49	NC.1	si:dkey-22o22.2
cdon	2.17739e-52	1.3885	0.993	0.607	4.46451e-48	NC.1	cdon
fli1a	1.09431e-50	0.603157	0.441	0.069	2.24378e-46	NC.1	fli1a
scml4	1.0998e-45	0.3824	0.172	0.009	2.25502e-41	NC.1	scml4
plxna3	7.84606e-45	1.18835	1	0.906	1.60876e-40	NC.1	plxna3
foxn3	1.81255e-44	0.950812	0.745	0.234	3.71644e-40	NC.1	foxn3
lef1	2.24584e-44	1.4923	0.8	0.317	4.60487e-40	NC.1	lef1
nrp2a	7.04663e-43	1.82497	0.6	0.176	1.44484e-38	NC.1	nrp2a
abi3a	7.20119e-43	0.379462	0.262	0.028	1.47653e-38	NC.1	abi3a
zic2b	1.45947e-42	0.818584	0.669	0.2	2.99251e-38	NC.1	zic2b
cxxc5a	3.2275e-41	1.17631	0.807	0.339	6.61767e-37	NC.1	cxxc5a
slmapb	1.57214e-40	0.346061	0.228	0.022	3.22351e-36	NC.1	slmapb
samd11	1.95032e-40	1.14713	0.676	0.226	3.99893e-36	NC.1	samd11
zeb2a	2.54796e-39	1.19473	0.966	0.65	5.22434e-35	NC.1	zeb2a
mtus1b	4.29286e-39	0.57064	0.386	0.07	8.80208e-35	NC.1	mtus1b
mctp2a	5.50675e-39	0.717181	0.407	0.079	1.1291e-34	NC.1	mctp2a
tle2a	7.01537e-37	1.06284	0.959	0.751	1.43843e-32	NC.1	tle2a
fnbp1l	1.33308e-36	1.03727	0.945	0.621	2.73335e-32	NC.1	fnbp1l
ebf1b	5.98592e-35	0.75961	0.345	0.063	1.22735e-30	NC.1	ebf1b
tanc2a	6.10284e-35	1.08849	0.69	0.263	1.25133e-30	NC.1	tanc2a
cachd1	1.24111e-33	1.01659	0.986	0.826	2.54478e-29	NC.1	cachd1
skia	2.0824e-33	0.986995	0.931	0.64	4.26975e-29	NC.1	skia
afap1	4.94374e-32	0.858293	0.738	0.32	1.01366e-27	NC.1	afap1
si:dkey-240h12.3	1.64383e-31	0.703554	0.434	0.11	3.3705e-27	NC.1	si:dkey-240h12.3
ebf3a	2.06953e-31	1.28545	0.621	0.217	4.24337e-27	NC.1	ebf3a
BX908388.3	2.91902e-31	0.741073	0.648	0.232	5.98515e-27	NC.1	BX908388.3
st3gal4	4.421e-31	0.324494	0.172	0.016	9.06482e-27	NC.1	st3gal4
cacna1ba	4.50515e-31	0.759378	0.317	0.061	9.23736e-27	NC.1	cacna1ba
pcdh1b	6.40449e-31	0.718909	0.586	0.183	1.31318e-26	NC.1	pcdh1b
itgb1a	1.97684e-30	0.712735	0.579	0.201	4.05332e-26	NC.1	itgb1a
klf12b	3.01516e-30	0.920861	0.545	0.173	6.18229e-26	NC.1	klf12b
cbfb	3.13833e-30	0.949691	0.621	0.228	6.43482e-26	NC.1	cbfb
ZNF423	4.73482e-30	1.02354	0.938	0.625	9.70828e-26	NC.1	ZNF423
rhoj	3.79384e-29	0.584917	0.441	0.122	7.77889e-25	NC.1	rhoj
zfhx4	5.45607e-29	0.826232	0.966	0.651	1.11871e-24	NC.1	zfhx4
cdh6	6.55741e-29	0.878143	0.552	0.17	1.34453e-24	NC.1	cdh6
msx3	7.48558e-29	0.281108	0.214	0.028	1.53484e-24	NC.1	msx3
bach2b	1.95479e-28	0.831394	0.862	0.513	4.0081e-24	NC.1	bach2b
nr2f5	2.14669e-28	1.00935	0.883	0.562	4.40158e-24	NC.1	nr2f5
enpp1	3.63711e-28	1.04436	0.621	0.237	7.45754e-24	NC.1	enpp1
slit2	5.3922e-28	1.01392	0.6	0.22	1.10562e-23	NC.1	slit2
zbtb16a	6.936e-28	0.88678	1	0.893	1.42216e-23	NC.1	zbtb16a
ptpn11b	1.96789e-27	0.386313	0.29	0.055	4.03497e-23	NC.1	ptpn11b
hspg2	3.56008e-27	0.893724	0.938	0.594	7.29959e-23	NC.1	hspg2
alx1	5.44781e-27	0.258854	0.152	0.014	1.11702e-22	NC.1	alx1
wnt3	1.91971e-26	0.591003	0.621	0.216	3.93618e-22	NC.1	wnt3
robo3	5.35628e-26	0.897175	0.931	0.59	1.09825e-21	NC.1	robo3
trim3b	7.87325e-26	0.79334	0.641	0.278	1.61433e-21	NC.1	trim3b
fscn1a	2.11495e-25	0.636305	0.566	0.209	4.3365e-21	NC.1	fscn1a
bcr	2.47037e-25	0.76287	0.545	0.198	5.06526e-21	NC.1	bcr
cxxc5b	5.89339e-25	0.686039	0.552	0.202	1.20838e-20	NC.1	cxxc5b
tln2a	9.25381e-25	0.826743	0.697	0.347	1.8974e-20	NC.1	tln2a
stard9	1.22229e-24	0.435678	0.434	0.125	2.50619e-20	NC.1	stard9
itga4	1.43047e-24	0.5932	0.248	0.046	2.93303e-20	NC.1	itga4
nid1b	1.58633e-24	0.645527	0.648	0.27	3.25261e-20	NC.1	nid1b
pxdn	1.62945e-24	0.93783	0.51	0.186	3.34102e-20	NC.1	pxdn
greb1l	6.81001e-24	0.736181	0.993	0.763	1.39633e-19	NC.1	greb1l
rxraa	1.20579e-23	0.732361	0.497	0.168	2.47236e-19	NC.1	rxraa
fam20cb	1.38946e-23	0.776548	0.214	0.036	2.84895e-19	NC.1	fam20cb
fabp3	1.77003e-23	0.522563	0.469	0.151	3.62927e-19	NC.1	fabp3
spsb4a	2.58672e-23	0.862537	0.917	0.633	5.30381e-19	NC.1	spsb4a
hipk2	9.32386e-23	0.877732	0.862	0.585	1.91176e-18	NC.1	hipk2
rundc3aa	2.12614e-22	0.349351	0.241	0.047	4.35943e-18	NC.1	rundc3aa
2023-09-12	3.46682e-22	1.01611	0.89	0.645	7.10836e-18	NC.1	2023-09-12
CCKBR	3.58577e-22	0.349361	0.11	0.009	7.35226e-18	NC.1	CCKBR
adgrd1	3.97573e-22	0.392404	0.138	0.015	8.15184e-18	NC.1	adgrd1
msx1b	1.01356e-21	0.711586	0.545	0.2	2.07821e-17	NC.1	msx1b
osbpl10b	1.06822e-21	0.934543	0.641	0.324	2.19028e-17	NC.1	osbpl10b
alcama	5.24684e-21	1.01793	0.634	0.291	1.07581e-16	NC.1	alcama
hbegfb	1.02943e-20	0.357628	0.31	0.079	2.11074e-16	NC.1	hbegfb
fmnl2b	1.68254e-20	0.683764	0.876	0.608	3.44988e-16	NC.1	fmnl2b
ptk7a	2.11385e-20	0.632746	0.683	0.355	4.33424e-16	NC.1	ptk7a
id3	1.06355e-19	0.548325	0.545	0.214	2.1807e-15	NC.1	id3
axin2	4.16869e-19	0.630031	0.731	0.408	8.54749e-15	NC.1	axin2
swap70b	7.10269e-19	0.47133	0.317	0.092	1.45634e-14	NC.1	swap70b
tesk2	7.85529e-19	0.548679	0.441	0.167	1.61065e-14	NC.1	tesk2
dclk1b	1.90688e-18	0.460526	0.297	0.08	3.90987e-14	NC.1	dclk1b
nradd	4.08293e-18	0.52864	0.579	0.255	8.37164e-14	NC.1	nradd
bahcc1b	4.58916e-18	0.688861	0.924	0.662	9.40962e-14	NC.1	bahcc1b
si:ch73-364h19.1	5.07512e-18	0.621059	0.441	0.167	1.0406e-13	NC.1	si:ch73-364h19.1
zswim5	1.31589e-17	0.610561	0.931	0.8	2.69809e-13	NC.1	zswim5
CU459056.1	2.38404e-17	0.645377	0.524	0.235	4.88824e-13	NC.1	CU459056.1
srsf5a	2.71629e-17	0.580632	0.841	0.666	5.56948e-13	NC.1	srsf5a
ankrd44	4.12247e-17	0.413147	0.366	0.123	8.45271e-13	NC.1	ankrd44
serinc5	5.07765e-17	0.694377	0.848	0.61	1.04112e-12	NC.1	serinc5
afap1l1b	5.52004e-17	0.253	0.186	0.037	1.13183e-12	NC.1	afap1l1b
lmo4b	1.30369e-16	0.620728	0.448	0.175	2.67308e-12	NC.1	lmo4b
nckap5l	1.42305e-16	0.624234	0.669	0.384	2.91782e-12	NC.1	nckap5l
rab3ip	1.8759e-16	0.324027	0.29	0.083	3.84635e-12	NC.1	rab3ip
id1	2.0108e-16	0.814893	0.841	0.583	4.12294e-12	NC.1	id1
celf4	2.11649e-16	0.874249	0.414	0.165	4.33965e-12	NC.1	celf4
lfng	2.19989e-16	0.593828	0.779	0.471	4.51064e-12	NC.1	lfng
soga1	6.70181e-16	0.518686	0.855	0.583	1.37414e-11	NC.1	soga1
kctd15a	6.92689e-16	0.48515	0.455	0.178	1.42029e-11	NC.1	kctd15a
atf3	8.09243e-16	0.4377	0.331	0.108	1.65927e-11	NC.1	atf3
si:ch211-1e14.1	9.26291e-16	0.522759	0.476	0.201	1.89927e-11	NC.1	si:ch211-1e14.1
smad6b	1.1356e-15	0.541977	0.8	0.471	2.32843e-11	NC.1	smad6b
map2	1.84926e-15	0.59644	0.428	0.175	3.79172e-11	NC.1	map2
dock7	3.74409e-15	0.741773	0.745	0.521	7.67688e-11	NC.1	dock7
tmeff1b	1.83327e-14	0.517072	0.814	0.524	3.75893e-10	NC.1	tmeff1b
pik3c2b	4.17827e-14	0.547466	0.71	0.413	8.56712e-10	NC.1	pik3c2b
tes	4.50987e-14	0.341824	0.283	0.089	9.24704e-10	NC.1	tes
rapgef5b	1.14456e-13	0.396718	0.455	0.195	2.3468e-09	NC.1	rapgef5b
pcnx3	1.55344e-13	0.494602	0.524	0.271	3.18517e-09	NC.1	pcnx3
mtss1lb	1.66525e-13	0.308827	0.297	0.097	3.41442e-09	NC.1	mtss1lb
sema6e	1.75614e-13	0.72844	0.724	0.429	3.60078e-09	NC.1	sema6e
rftn2	2.44017e-13	0.458999	0.428	0.188	5.00332e-09	NC.1	rftn2
efhd2	3.30442e-13	0.358518	0.297	0.101	6.77538e-09	NC.1	efhd2
arhgap12b	3.33707e-13	0.547005	0.772	0.554	6.84232e-09	NC.1	arhgap12b
sema4c	4.76997e-13	0.491212	0.848	0.636	9.78034e-09	NC.1	sema4c
mrtfbb	8.4252e-13	0.539996	0.414	0.185	1.7275e-08	NC.1	mrtfbb
npm1a	1.0953e-12	0.49581	0.779	0.571	2.24581e-08	NC.1	npm1a
spag1a	1.10454e-12	0.309638	0.393	0.16	2.26475e-08	NC.1	spag1a
efna1a	1.30298e-12	0.394293	0.559	0.288	2.67164e-08	NC.1	efna1a
tns3.2	1.98937e-12	0.370978	0.441	0.197	4.07901e-08	NC.1	tns3.2
zeb1a	2.88967e-12	0.423575	0.538	0.285	5.92497e-08	NC.1	zeb1a
sdr16c5b	4.24715e-12	0.336882	0.317	0.119	8.70835e-08	NC.1	sdr16c5b
adgrl1a	6.31874e-12	0.650539	0.359	0.148	1.29559e-07	NC.1	adgrl1a
col12a1a	1.17353e-11	0.679552	0.572	0.346	2.4062e-07	NC.1	col12a1a
id2a	1.58128e-11	0.376708	0.248	0.083	3.24226e-07	NC.1	id2a
arhgef1a	2.11467e-11	0.341073	0.386	0.167	4.33592e-07	NC.1	arhgef1a
celf5a	4.56674e-11	0.846725	0.276	0.108	9.36365e-07	NC.1	celf5a
dock11	6.25755e-11	0.446516	0.386	0.174	1.28305e-06	NC.1	dock11
agrn	7.16025e-11	0.431302	0.972	0.916	1.46814e-06	NC.1	agrn
junba	7.85172e-11	0.296135	0.255	0.089	1.60992e-06	NC.1	junba
OSBPL8	1.09415e-10	0.448275	0.372	0.176	2.24344e-06	NC.1	OSBPL8
bmper	1.44324e-10	0.395476	0.276	0.101	2.95923e-06	NC.1	bmper
LO016987.2	2.09116e-10	0.469402	0.448	0.234	4.28772e-06	NC.1	LO016987.2
pho	5.34159e-10	0.518971	0.641	0.396	1.09524e-05	NC.1	pho
zbtb10	5.54929e-10	0.264308	0.269	0.102	1.13783e-05	NC.1	zbtb10
aclya	8.71136e-10	0.489889	0.421	0.22	1.78618e-05	NC.1	aclya
susd6	9.81935e-10	0.386527	0.552	0.312	2.01336e-05	NC.1	susd6
cited4b	1.16434e-09	0.331887	0.352	0.162	2.38737e-05	NC.1	cited4b
eif6	1.17117e-09	0.353805	0.407	0.2	2.40137e-05	NC.1	eif6
lsp1b	1.23005e-09	0.381161	0.586	0.35	2.52209e-05	NC.1	lsp1b
nop56	1.2786e-09	0.368781	0.979	0.861	2.62165e-05	NC.1	nop56
pum3	1.4676e-09	0.361947	0.731	0.519	3.00916e-05	NC.1	pum3
mllt10	1.53066e-09	0.389888	0.986	0.883	3.13846e-05	NC.1	mllt10
wasf3b	1.8583e-09	0.402002	0.759	0.534	3.81026e-05	NC.1	wasf3b
mef2aa	2.18352e-09	0.321447	0.455	0.23	4.47709e-05	NC.1	mef2aa
hspd1	2.84704e-09	0.282438	0.359	0.165	5.83758e-05	NC.1	hspd1
gas2l1	3.13684e-09	0.308343	0.2	0.068	6.43177e-05	NC.1	gas2l1
BX927333.1	3.54661e-09	0.329523	0.269	0.109	7.27196e-05	NC.1	BX927333.1
si:ch211-263k4.2.1	4.04929e-09	0.282715	0.2	0.068	8.30267e-05	NC.1	si:ch211-263k4.2.1
tbc1d1	4.36231e-09	0.362822	0.379	0.19	8.94449e-05	NC.1	tbc1d1
ccnjl	5.12417e-09	0.450575	0.703	0.494	0.000105066	NC.1	ccnjl
mybbp1a	1.54759e-08	0.469177	0.759	0.59	0.000317317	NC.1	mybbp1a
glceb	1.75367e-08	0.316189	0.593	0.36	0.000359573	NC.1	glceb
prom1a	1.91241e-08	0.272065	0.241	0.098	0.000392121	NC.1	prom1a
cnp	1.94433e-08	0.371148	0.469	0.269	0.000398666	NC.1	cnp
ror2	2.00561e-08	0.536558	0.731	0.538	0.000411231	NC.1	ror2
arrb1	2.31582e-08	0.268011	0.207	0.076	0.000474835	NC.1	arrb1
si:ch211-13k12.2	2.53324e-08	0.423796	0.697	0.496	0.000519416	NC.1	si:ch211-13k12.2
gmps	2.61075e-08	0.44377	0.8	0.636	0.000535309	NC.1	gmps
foxn2b	2.96323e-08	0.348333	0.407	0.215	0.000607581	NC.1	foxn2b
stt3b	3.39453e-08	0.417593	0.869	0.77	0.000696015	NC.1	stt3b
lrp1ab	4.37778e-08	0.384071	0.869	0.786	0.000897621	NC.1	lrp1ab
hnrnpm	4.85738e-08	0.383409	0.938	0.863	0.000995958	NC.1	hnrnpm
camsap2a	5.8008e-08	0.378055	0.428	0.245	0.0011894	NC.1	camsap2a
gtdc1	6.29752e-08	0.351591	0.393	0.213	0.00129124	NC.1	gtdc1
ptprk	6.91928e-08	0.380637	0.579	0.378	0.00141873	NC.1	ptprk
polr1a	7.0079e-08	0.378203	0.676	0.458	0.0014369	NC.1	polr1a
ctps1a	7.13087e-08	0.350671	0.91	0.77	0.00146211	NC.1	ctps1a
pprc1	7.88747e-08	0.357843	0.621	0.416	0.00161725	NC.1	pprc1
zgc:92242	8.70306e-08	0.4163	0.579	0.371	0.00178448	NC.1	zgc:92242
XKR4	8.86691e-08	1.04345	0.386	0.202	0.00181807	NC.1	XKR4
pard3ba	9.71366e-08	0.27264	0.214	0.084	0.00199169	NC.1	pard3ba
ptbp2b	9.89878e-08	0.339185	0.634	0.439	0.00202965	NC.1	ptbp2b
nf1b	1.11588e-07	0.373389	0.607	0.416	0.00228801	NC.1	nf1b
ephb4a	1.23515e-07	0.35785	0.869	0.666	0.00253255	NC.1	ephb4a
ephb4b	1.41071e-07	0.459862	0.476	0.294	0.00289253	NC.1	ephb4b
pwp2h	1.71734e-07	0.428311	0.786	0.653	0.00352123	NC.1	pwp2h
tmeff2a	1.9699e-07	0.316139	0.159	0.054	0.00403908	NC.1	tmeff2a
noc2l	1.97628e-07	0.342043	0.752	0.558	0.00405216	NC.1	noc2l
cwc27	2.3164e-07	0.350757	0.621	0.437	0.00474955	NC.1	cwc27
si:ch211-114l13.7	2.38101e-07	0.338495	0.338	0.182	0.00488203	NC.1	si:ch211-114l13.7
sptbn2	2.59143e-07	0.385126	0.566	0.376	0.00531347	NC.1	sptbn2
zgc:101566	2.94989e-07	0.285468	0.297	0.141	0.00604844	NC.1	zgc:101566
sulf1	3.32813e-07	0.442494	0.683	0.488	0.006824	NC.1	sulf1
slc39a14	3.6203e-07	0.562808	0.538	0.363	0.00742306	NC.1	slc39a14
cers2b	3.62672e-07	0.315431	0.407	0.232	0.00743623	NC.1	cers2b
bms1	4.26267e-07	0.374858	0.51	0.327	0.00874017	NC.1	bms1
st8sia6	4.56883e-07	0.335446	0.386	0.212	0.00936794	NC.1	st8sia6
pou2f2a.1	5.16913e-07	0.433651	0.552	0.354	0.0105988	NC.1	pou2f2a.1
tlcd3a	5.21283e-07	0.308913	0.497	0.302	0.0106884	NC.1	tlcd3a
cd276	5.46751e-07	0.265517	0.345	0.18	0.0112106	NC.1	cd276
prmt1	5.55294e-07	0.290378	0.738	0.565	0.0113857	NC.1	prmt1
smurf1	7.3395e-07	0.351374	0.759	0.604	0.0150489	NC.1	smurf1
erbb3b	7.88347e-07	0.306184	0.172	0.066	0.0161643	NC.1	erbb3b
ncoa2	8.32303e-07	0.358707	0.959	0.951	0.0170655	NC.1	ncoa2
marcksl1b	8.46726e-07	0.355598	0.538	0.345	0.0173613	NC.1	marcksl1b
prkcbp1l	8.82316e-07	0.367658	0.669	0.49	0.018091	NC.1	prkcbp1l
si:ch73-335l21.1	8.85205e-07	0.383548	0.531	0.365	0.0181502	NC.1	si:ch73-335l21.1
her9	1.15017e-06	0.525078	0.428	0.265	0.0235831	NC.1	her9
pcdh2g28	1.19713e-06	0.378033	0.428	0.259	0.0245459	NC.1	pcdh2g28
mgat4a	1.31998e-06	0.323815	0.497	0.313	0.0270649	NC.1	mgat4a
ARHGEF17	1.43372e-06	0.262928	0.4	0.228	0.029397	NC.1	ARHGEF17
nol6	1.43625e-06	0.276333	0.6	0.396	0.0294488	NC.1	nol6
rgs12a	1.45768e-06	0.358674	0.593	0.435	0.0298883	NC.1	rgs12a
jmjd1cb	1.71852e-06	0.340727	0.924	0.842	0.0352365	NC.1	jmjd1cb
dhx36	1.82922e-06	0.335874	0.807	0.646	0.0375062	NC.1	dhx36
MYO1D	1.87063e-06	0.322846	0.497	0.31	0.0383554	NC.1	MYO1D
cfdp1	2.10682e-06	0.353908	0.738	0.578	0.0431982	NC.1	cfdp1
trmt6	2.45556e-06	0.292869	0.469	0.296	0.0503489	NC.1	trmt6
pdcd11	2.48155e-06	0.293367	0.669	0.491	0.0508817	NC.1	pdcd11
nop2	3.05491e-06	0.325177	0.586	0.417	0.0626378	NC.1	nop2
mthfd1l	3.19289e-06	0.254331	0.359	0.201	0.065467	NC.1	mthfd1l
wdr36	3.75422e-06	0.341318	0.766	0.605	0.0769766	NC.1	wdr36
ncl	4.93395e-06	0.309186	0.883	0.748	0.101166	NC.1	ncl
slc36a1	5.58953e-06	0.259579	0.359	0.202	0.114608	NC.1	slc36a1
gnao1a	6.06902e-06	0.337743	0.49	0.31	0.124439	NC.1	gnao1a
rbm19	6.37087e-06	0.288435	0.524	0.343	0.130628	NC.1	rbm19
asap1a	6.56262e-06	0.354963	0.772	0.637	0.13456	NC.1	asap1a
pgpep1	7.07556e-06	0.254649	0.303	0.163	0.145077	NC.1	pgpep1
stat1a	7.10003e-06	0.256873	0.359	0.202	0.145579	NC.1	stat1a
atp1b2a	7.35116e-06	0.254907	0.372	0.217	0.150728	NC.1	atp1b2a
rab30	9.35942e-06	0.259253	0.614	0.419	0.191905	NC.1	rab30
zeb1b	9.49525e-06	0.259584	0.938	0.771	0.194691	NC.1	zeb1b
heatr1	1.07298e-05	0.298013	0.731	0.588	0.220005	NC.1	heatr1
ptbp3	1.08366e-05	0.264575	0.786	0.615	0.222193	NC.1	ptbp3
dbn1	1.27426e-05	0.286959	0.703	0.512	0.261273	NC.1	dbn1
col4a5	1.35666e-05	0.559806	0.607	0.496	0.27817	NC.1	col4a5
btbd7	1.41016e-05	0.288416	0.414	0.259	0.289139	NC.1	btbd7
rbm28	1.52165e-05	0.321263	0.724	0.585	0.311999	NC.1	rbm28
eef1b2	1.54313e-05	0.293523	0.897	0.791	0.316404	NC.1	eef1b2
kirrel1a	1.7063e-05	0.362208	0.766	0.631	0.349861	NC.1	kirrel1a
arl5a	2.0454e-05	0.286046	0.31	0.179	0.41939	NC.1	arl5a
si:ch211-220f16.2	2.22194e-05	0.287142	0.517	0.357	0.455587	NC.1	si:ch211-220f16.2
si:dkey-68o6.5	2.30526e-05	0.275177	0.276	0.15	0.472671	NC.1	si:dkey-68o6.5
RASA2	2.30692e-05	0.381158	0.441	0.3	0.47301	NC.1	RASA2
slc12a7a	2.76594e-05	0.33783	0.524	0.372	0.567129	NC.1	slc12a7a
sash1a	3.08548e-05	0.295856	0.697	0.547	0.632647	NC.1	sash1a
dkc1	3.27834e-05	0.310074	0.834	0.712	0.672191	NC.1	dkc1
col4a6	3.33983e-05	0.53285	0.821	0.712	0.684798	NC.1	col4a6
gpc5a	3.38707e-05	0.361868	0.248	0.133	0.694486	NC.1	gpc5a
rabgap1	3.43449e-05	0.282348	0.531	0.387	0.704209	NC.1	rabgap1
bcar1	4.00453e-05	0.273526	0.586	0.404	0.821089	NC.1	bcar1
ddx18	4.232e-05	0.282915	0.869	0.735	0.867729	NC.1	ddx18
midn	4.73346e-05	0.400187	0.759	0.65	0.970548	NC.1	midn
ewsr1a	4.75368e-05	0.251378	0.828	0.718	0.974695	NC.1	ewsr1a
nkd1	4.76058e-05	0.516503	0.538	0.429	0.976109	NC.1	nkd1
ucp2	5.11339e-05	0.292597	0.428	0.283	1	NC.1	ucp2
pvrl2l	5.16665e-05	0.360024	0.738	0.57	1	NC.1	pvrl2l
xylt1	5.24728e-05	0.252563	0.634	0.463	1	NC.1	xylt1
bcas3	5.77963e-05	0.270388	0.579	0.417	1	NC.1	bcas3
nck1b	7.13831e-05	0.282124	0.566	0.413	1	NC.1	nck1b
vav2	7.41949e-05	0.427155	0.538	0.419	1	NC.1	vav2
znf609a	7.5381e-05	0.268286	0.731	0.63	1	NC.1	znf609a
zbtb2b	7.55158e-05	0.281098	0.545	0.388	1	NC.1	zbtb2b
fgfr4	7.56547e-05	0.301567	0.579	0.42	1	NC.1	fgfr4
suco	8.42696e-05	0.3016	0.545	0.391	1	NC.1	suco
zgc:100829	8.44841e-05	0.267018	0.662	0.515	1	NC.1	zgc:100829
prps1b	8.5357e-05	0.25513	0.634	0.463	1	NC.1	prps1b
fbl	8.99018e-05	0.258233	0.593	0.437	1	NC.1	fbl
ier2a	0.000111241	0.297622	0.269	0.154	1	NC.1	ier2a
csk	0.000114391	0.304648	0.545	0.396	1	NC.1	csk
btaf1	0.000138096	0.269257	0.683	0.537	1	NC.1	btaf1
abcf1	0.000138112	0.270806	0.683	0.568	1	NC.1	abcf1
pes	0.00015869	0.262024	0.517	0.367	1	NC.1	pes
slc35d1a	0.000158949	0.269292	0.469	0.332	1	NC.1	slc35d1a
plppr3a	0.000169901	0.303444	0.455	0.31	1	NC.1	plppr3a
ddx3xb	0.000181056	0.25738	0.566	0.417	1	NC.1	ddx3xb
zmynd19	0.000197064	0.283257	0.538	0.413	1	NC.1	zmynd19
si:dkey-33c12.4	0.000202437	0.284763	0.648	0.509	1	NC.1	si:dkey-33c12.4
si:ch211-168f7.5	0.000202655	0.40188	0.586	0.475	1	NC.1	si:ch211-168f7.5
hnrnpabb	0.000230397	0.306677	0.71	0.58	1	NC.1	hnrnpabb
GK3P	0.000268293	0.271552	0.759	0.631	1	NC.1	GK3P
tfdp1a	0.00027923	0.284419	0.559	0.429	1	NC.1	tfdp1a
rrp12	0.000280517	0.250793	0.545	0.42	1	NC.1	rrp12
ADAMTS7	0.000286882	0.256092	0.386	0.259	1	NC.1	ADAMTS7
fam171a2a	0.000312722	0.25139	0.579	0.449	1	NC.1	fam171a2a
mn1a	0.000322422	0.295399	0.4	0.266	1	NC.1	mn1a
PLEKHH3	0.000328723	0.272333	0.407	0.282	1	NC.1	PLEKHH3
cdk5rap1	0.000330326	0.258722	0.697	0.572	1	NC.1	cdk5rap1
akap13	0.000381104	0.261768	0.697	0.578	1	NC.1	akap13
zmiz1a	0.000422911	0.289702	0.834	0.771	1	NC.1	zmiz1a
nsun2	0.000476096	0.268908	0.462	0.332	1	NC.1	nsun2
kdm2ba	0.000486608	0.292284	0.662	0.563	1	NC.1	kdm2ba
ap3b1a	0.000710026	0.254226	0.407	0.293	1	NC.1	ap3b1a
ttf1	0.000959326	0.287372	0.386	0.277	1	NC.1	ttf1
CR936977.2	0.0010097	0.579111	0.331	0.23	1	NC.1	CR936977.2
hspa9	0.00133644	0.276799	0.524	0.417	1	NC.1	hspa9
gphna	0.00149315	0.264093	0.414	0.305	1	NC.1	gphna
aff2	0.0018804	0.265898	0.586	0.456	1	NC.1	aff2
ttyh3a	0.00203098	0.28822	0.793	0.686	1	NC.1	ttyh3a
XPO5	0.00264116	0.264789	0.448	0.336	1	NC.1	XPO5
UTP14C	0.00317649	0.265762	0.372	0.272	1	NC.1	UTP14C
dnm2a	0.00704807	0.252678	0.538	0.455	1	NC.1	dnm2a
vgll3	2.33394e-155	1.19938	0.594	0.032	4.78552e-151	r1/r2/r4	vgll3
hoxa2b	6.50828e-110	0.666281	0.448	0.026	1.33446e-105	r1/r2/r4	hoxa2b
pax6a	6.14414e-101	1.87664	0.923	0.192	1.25979e-96	r1/r2/r4	pax6a
skap2	8.86178e-88	0.900161	0.524	0.056	1.81702e-83	r1/r2/r4	skap2
tox3	1.57071e-76	1.48646	0.958	0.321	3.22059e-72	r1/r2/r4	tox3
auts2b	5.21537e-76	1.59453	0.972	0.332	1.06936e-71	r1/r2/r4	auts2b
chl1b	9.07174e-75	1.68316	0.874	0.229	1.86007e-70	r1/r2/r4	chl1b
ephb4a1	8.08679e-67	1.77303	0.993	0.658	1.65812e-62	r1/r2/r4	ephb4a
plekhh1	7.88343e-66	1.77502	0.986	0.649	1.61642e-61	r1/r2/r4	plekhh1
cntfr	2.35324e-65	2.05857	1	0.685	4.82509e-61	r1/r2/r4	cntfr
irx3a	2.08534e-60	0.736291	0.594	0.111	4.27578e-56	r1/r2/r4	irx3a
CT990561.1	3.53558e-58	1.28061	0.664	0.156	7.24934e-54	r1/r2/r4	CT990561.1
ndst3	5.07109e-58	1.26395	0.86	0.268	1.03978e-53	r1/r2/r4	ndst3
col7a1l	5.50783e-56	1.0173	0.51	0.085	1.12932e-51	r1/r2/r4	col7a1l
ptprfb	7.7715e-55	1.30459	0.993	0.957	1.59347e-50	r1/r2/r4	ptprfb
rasal2	1.95504e-54	1.31959	1	0.761	4.00862e-50	r1/r2/r4	rasal2
lamb2l	2.76011e-53	0.93028	0.818	0.239	5.65934e-49	r1/r2/r4	lamb2l
FRMD5	2.89147e-49	1.35936	0.846	0.311	5.92866e-45	r1/r2/r4	FRMD5
greb1l1	1.8242e-46	1.27907	0.993	0.764	3.74033e-42	r1/r2/r4	greb1l
pax7b	3.25312e-46	1.57899	0.657	0.186	6.67019e-42	r1/r2/r4	pax7b
efnb3b	5.34129e-45	1.26328	0.986	0.656	1.09518e-40	r1/r2/r4	efnb3b
her4.2	6.21567e-45	1.34493	0.797	0.283	1.27446e-40	r1/r2/r4	her4.2
dtnba	5.10228e-44	1.16262	0.86	0.43	1.04617e-39	r1/r2/r4	dtnba
cyp26c1	6.86464e-44	0.505844	0.413	0.067	1.40753e-39	r1/r2/r4	cyp26c1
kdrl	1.11769e-43	0.641506	0.343	0.049	2.2917e-39	r1/r2/r4	kdrl
CU459056.11	2.02047e-43	0.951934	0.706	0.224	4.14277e-39	r1/r2/r4	CU459056.1
kif1aa	4.59481e-42	0.785628	0.469	0.098	9.42119e-38	r1/r2/r4	kif1aa
cgnl1	1.0498e-41	1.13847	0.888	0.425	2.1525e-37	r1/r2/r4	cgnl1
plp1a	2.77045e-41	1.00547	0.713	0.232	5.68054e-37	r1/r2/r4	plp1a
fstl1b	7.62513e-41	1.05401	0.972	0.697	1.56346e-36	r1/r2/r4	fstl1b
meis2a	8.05108e-41	0.906536	0.622	0.18	1.65079e-36	r1/r2/r4	meis2a
jag2b	2.62179e-39	1.1027	0.986	0.678	5.37573e-35	r1/r2/r4	jag2b
st8sia2	3.48522e-39	1.05802	0.776	0.292	7.14609e-35	r1/r2/r4	st8sia2
fam189a1	3.04014e-38	1.08886	0.615	0.184	6.2335e-34	r1/r2/r4	fam189a1
scube2	2.92713e-37	1.10037	0.846	0.384	6.0018e-33	r1/r2/r4	scube2
adgrl1a1	3.08035e-37	1.36375	0.524	0.138	6.31595e-33	r1/r2/r4	adgrl1a
CR356242.1	1.10477e-36	0.930688	0.538	0.141	2.26521e-32	r1/r2/r4	CR356242.1
her4.2.1	1.6883e-36	0.95898	0.601	0.177	3.46169e-32	r1/r2/r4	her4.2.1
bmpr1ba	8.79143e-36	1.05953	0.951	0.526	1.80259e-31	r1/r2/r4	bmpr1ba
lrp2a	9.18788e-36	1.09207	0.923	0.512	1.88388e-31	r1/r2/r4	lrp2a
LO018430.2	1.22215e-35	0.476991	0.336	0.057	2.5059e-31	r1/r2/r4	LO018430.2
sema3gb	5.37926e-35	0.904915	0.483	0.119	1.10296e-30	r1/r2/r4	sema3gb
epha4b	1.71732e-33	1.01702	0.832	0.368	3.52119e-29	r1/r2/r4	epha4b
adamts3	1.40516e-32	1.46633	0.636	0.237	2.88114e-28	r1/r2/r4	adamts3
ccdc85ca	4.29249e-32	0.801073	0.713	0.278	8.80133e-28	r1/r2/r4	ccdc85ca
rgs3b	1.42128e-31	0.774861	0.727	0.29	2.9142e-27	r1/r2/r4	rgs3b
lhfpl2b	8.66066e-31	0.675946	0.622	0.22	1.77578e-26	r1/r2/r4	lhfpl2b
mn1a1	3.91453e-30	0.759105	0.678	0.248	8.02636e-26	r1/r2/r4	mn1a
si:ch211-286o17.1	4.93519e-30	1.109	0.713	0.312	1.01191e-25	r1/r2/r4	si:ch211-286o17.1
irx5a	1.17149e-29	0.424649	0.315	0.06	2.40203e-25	r1/r2/r4	irx5a
her4.1	2.43992e-29	0.814731	0.531	0.163	5.00281e-25	r1/r2/r4	her4.1
letm1	2.63345e-28	0.811279	0.874	0.501	5.39963e-24	r1/r2/r4	letm1
si:ch211-152c2.3	3.36686e-28	0.666142	0.58	0.199	6.90342e-24	r1/r2/r4	si:ch211-152c2.3
tead1b	8.44217e-28	1.06706	0.895	0.662	1.73098e-23	r1/r2/r4	tead1b
dennd2b	1.59526e-27	0.63361	0.441	0.125	3.27091e-23	r1/r2/r4	dennd2b
adgrv1	9.32724e-27	0.809033	0.958	0.59	1.91246e-22	r1/r2/r4	adgrv1
her15.1	2.59471e-26	0.892647	0.839	0.441	5.3202e-22	r1/r2/r4	her15.1
cdh2	8.654e-26	0.732082	0.993	0.819	1.77442e-21	r1/r2/r4	cdh2
cadm1a	9.50027e-26	0.89813	0.895	0.536	1.94794e-21	r1/r2/r4	cadm1a
pkdcca	7.3878e-25	0.928992	0.699	0.32	1.51479e-20	r1/r2/r4	pkdcca
her2	9.38962e-25	0.632302	0.434	0.129	1.92525e-20	r1/r2/r4	her2
cxcl12a	1.06768e-24	0.559871	0.622	0.221	2.18916e-20	r1/r2/r4	cxcl12a
nr2f51	1.72313e-24	0.788627	0.923	0.56	3.53311e-20	r1/r2/r4	nr2f5
neo1a	1.33174e-23	0.655291	0.986	0.957	2.73061e-19	r1/r2/r4	neo1a
igf2b	2.94465e-23	0.313521	0.224	0.038	6.03771e-19	r1/r2/r4	igf2b
ror1	3.67479e-23	0.787177	0.909	0.55	7.53479e-19	r1/r2/r4	ror1
plch1	1.58185e-22	0.728182	0.944	0.595	3.24342e-18	r1/r2/r4	plch1
fam168a	3.02847e-22	0.774147	0.958	0.787	6.20958e-18	r1/r2/r4	fam168a
mapk12b	3.35209e-22	0.484637	0.413	0.127	6.87313e-18	r1/r2/r4	mapk12b
akt1	1.95419e-21	0.314549	0.196	0.032	4.00687e-17	r1/r2/r4	akt1
nova2	2.67602e-21	0.760241	0.986	0.663	5.48692e-17	r1/r2/r4	nova2
mapk11	3.53497e-21	0.520618	0.483	0.172	7.2481e-17	r1/r2/r4	mapk11
zbtb16a1	5.24134e-21	0.709379	1	0.893	1.07469e-16	r1/r2/r4	zbtb16a
her3	3.5881e-20	0.555438	0.259	0.058	7.35705e-16	r1/r2/r4	her3
lfng1	3.73987e-20	0.754507	0.804	0.469	7.66823e-16	r1/r2/r4	lfng
epha4a	7.55135e-20	0.309141	0.902	0.474	1.54833e-15	r1/r2/r4	epha4a
fndc3ba	1.4342e-19	0.62338	0.972	0.793	2.94068e-15	r1/r2/r4	fndc3ba
epha7	1.51095e-19	0.686916	0.895	0.577	3.09804e-15	r1/r2/r4	epha7
mdkb	2.83171e-19	0.615335	0.671	0.324	5.80613e-15	r1/r2/r4	mdkb
adgrl2a	3.661e-19	0.574752	1	0.917	7.50652e-15	r1/r2/r4	adgrl2a
her12	4.37923e-19	0.6333	0.601	0.253	8.97918e-15	r1/r2/r4	her12
kaznb	4.61781e-19	0.615767	0.755	0.393	9.46835e-15	r1/r2/r4	kaznb
robo4	5.03982e-19	0.761034	0.469	0.175	1.03336e-14	r1/r2/r4	robo4
sorbs2b	9.28128e-19	0.412059	0.406	0.131	1.90303e-14	r1/r2/r4	sorbs2b
s1pr2	1.80564e-18	0.6855	0.818	0.496	3.70229e-14	r1/r2/r4	s1pr2
gli2b	2.69467e-18	0.72519	0.657	0.35	5.52514e-14	r1/r2/r4	gli2b
sulf2b	1.34905e-17	0.505645	0.308	0.089	2.76609e-13	r1/r2/r4	sulf2b
tead1a	1.45036e-17	0.685224	0.888	0.652	2.97382e-13	r1/r2/r4	tead1a
stk40	2.85714e-17	0.471122	0.413	0.151	5.85828e-13	r1/r2/r4	stk40
her15.2	3.26066e-17	0.590331	0.615	0.29	6.68565e-13	r1/r2/r4	her15.2
ephb2b	6.78074e-17	0.751115	0.601	0.298	1.39032e-12	r1/r2/r4	ephb2b
BX284638.2	9.06848e-17	0.670879	0.811	0.496	1.8594e-12	r1/r2/r4	BX284638.2
cyp26b1	1.60643e-16	0.539983	0.252	0.063	3.29383e-12	r1/r2/r4	cyp26b1
shroom2a	1.75097e-16	0.611875	0.636	0.333	3.59019e-12	r1/r2/r4	shroom2a
notch1b	2.64785e-16	0.606075	0.839	0.537	5.42915e-12	r1/r2/r4	notch1b
lin28a	2.66391e-16	0.556331	0.874	0.569	5.46209e-12	r1/r2/r4	lin28a
ptprn2	3.33263e-16	0.571188	0.818	0.444	6.83323e-12	r1/r2/r4	ptprn2
ncam1a	3.70159e-16	0.603249	0.951	0.59	7.58975e-12	r1/r2/r4	ncam1a
her4.4	3.91879e-16	0.579741	0.385	0.141	8.03508e-12	r1/r2/r4	her4.4
cspg5a	4.15601e-16	0.521148	0.587	0.269	8.52148e-12	r1/r2/r4	cspg5a
uacab	4.59207e-16	0.512903	0.573	0.259	9.41558e-12	r1/r2/r4	uacab
cdk6	4.62303e-16	0.612837	0.776	0.48	9.47905e-12	r1/r2/r4	cdk6
fat3a	5.39641e-16	0.574781	0.916	0.643	1.10648e-11	r1/r2/r4	fat3a
lamb2	7.35871e-16	0.399448	0.287	0.084	1.50883e-11	r1/r2/r4	lamb2
nr2f2	8.71228e-16	0.588037	0.629	0.314	1.78637e-11	r1/r2/r4	nr2f2
lrig1	1.06119e-15	0.725976	0.895	0.636	2.17587e-11	r1/r2/r4	lrig1
SFMBT1	1.23226e-15	0.400269	0.364	0.129	2.52664e-11	r1/r2/r4	SFMBT1
wwtr1	1.48334e-15	0.643595	0.671	0.394	3.04144e-11	r1/r2/r4	wwtr1
fgfr41	2.16384e-15	0.517756	0.734	0.411	4.43674e-11	r1/r2/r4	fgfr4
rrm1	2.41464e-15	0.641875	0.769	0.459	4.95098e-11	r1/r2/r4	rrm1
nsd2	3.19541e-15	0.484468	0.839	0.55	6.55188e-11	r1/r2/r4	nsd2
ctnnd2b	3.20394e-15	0.554455	0.783	0.446	6.56935e-11	r1/r2/r4	ctnnd2b
si:ch1073-186i23.1	3.24218e-15	0.493979	0.559	0.273	6.64777e-11	r1/r2/r4	si:ch1073-186i23.1
tiam1a	3.33091e-15	0.669846	0.776	0.491	6.82969e-11	r1/r2/r4	tiam1a
myh14	4.39249e-15	0.476313	0.559	0.254	9.00637e-11	r1/r2/r4	myh14
sema5ba	6.60988e-15	0.522281	0.587	0.277	1.35529e-10	r1/r2/r4	sema5ba
pax3b	9.12663e-15	0.372274	0.385	0.138	1.87132e-10	r1/r2/r4	pax3b
zeb2b	1.07001e-14	0.537802	0.476	0.206	2.19395e-10	r1/r2/r4	zeb2b
her4.3	2.06105e-14	0.281781	0.266	0.078	4.22597e-10	r1/r2/r4	her4.3
hs3st3b1a	2.07835e-14	0.567465	0.42	0.17	4.26146e-10	r1/r2/r4	hs3st3b1a
tet3	2.54726e-14	0.506909	0.902	0.552	5.22291e-10	r1/r2/r4	tet3
msi1	2.62573e-14	0.460474	0.902	0.564	5.38379e-10	r1/r2/r4	msi1
zbtb42	2.81977e-14	0.288798	0.294	0.093	5.78165e-10	r1/r2/r4	zbtb42
tinagl1	2.82742e-14	0.495891	0.245	0.071	5.79733e-10	r1/r2/r4	tinagl1
plxdc2	5.32602e-14	0.533744	0.734	0.409	1.09205e-09	r1/r2/r4	plxdc2
tpm3	5.75645e-14	0.500592	0.748	0.468	1.1803e-09	r1/r2/r4	tpm3
rfx4	1.02531e-13	0.412023	0.825	0.445	2.10229e-09	r1/r2/r4	rfx4
arhgef10la	1.38369e-13	0.519067	0.615	0.332	2.83711e-09	r1/r2/r4	arhgef10la
tox	1.43722e-13	0.547757	0.951	0.746	2.94688e-09	r1/r2/r4	tox
ccdc102a	1.73854e-13	0.511108	0.671	0.389	3.5647e-09	r1/r2/r4	ccdc102a
srgap2	1.94924e-13	0.58304	0.986	0.881	3.99672e-09	r1/r2/r4	srgap2
epb41a	3.04038e-13	0.479073	0.832	0.546	6.23399e-09	r1/r2/r4	epb41a
notch1a	3.80539e-13	0.515372	0.888	0.614	7.80258e-09	r1/r2/r4	notch1a
LO018148.1	5.79815e-13	0.542372	0.79	0.541	1.18885e-08	r1/r2/r4	LO018148.1
gpm6bb	8.14348e-13	0.452229	0.552	0.282	1.66974e-08	r1/r2/r4	gpm6bb
BX324164.5	8.7545e-13	0.312935	0.301	0.105	1.79502e-08	r1/r2/r4	BX324164.5
arhgef10lb	1.01187e-12	0.498327	0.483	0.225	2.07474e-08	r1/r2/r4	arhgef10lb
ccn1	1.43581e-12	0.270581	0.189	0.048	2.94398e-08	r1/r2/r4	ccn1
lix1	2.27692e-12	0.290647	0.273	0.089	4.6686e-08	r1/r2/r4	lix1
gng2	3.65395e-12	0.268502	0.322	0.118	7.49205e-08	r1/r2/r4	gng2
LHFPL6	5.44357e-12	0.389629	0.259	0.085	1.11615e-07	r1/r2/r4	LHFPL6
gulp1a	5.79566e-12	0.357561	0.608	0.321	1.18834e-07	r1/r2/r4	gulp1a
ank2b	6.0527e-12	0.443713	0.783	0.512	1.24105e-07	r1/r2/r4	ank2b
epha2a	6.37101e-12	0.711967	0.517	0.276	1.30631e-07	r1/r2/r4	epha2a
ncam1b	7.07917e-12	0.350186	0.538	0.257	1.45151e-07	r1/r2/r4	ncam1b
ssh1a	7.39687e-12	0.296207	0.266	0.09	1.51665e-07	r1/r2/r4	ssh1a
nat8l	9.36831e-12	0.436502	0.86	0.589	1.92088e-07	r1/r2/r4	nat8l
adgrg1.1	1.46914e-11	0.259469	0.287	0.102	3.01232e-07	r1/r2/r4	adgrg1.1
adgrl3.1	1.77634e-11	0.456081	0.538	0.275	3.64222e-07	r1/r2/r4	adgrl3.1
ddr1	1.90467e-11	0.539734	0.699	0.46	3.90534e-07	r1/r2/r4	ddr1
setbp1	2.53157e-11	0.518112	0.727	0.495	5.19073e-07	r1/r2/r4	setbp1
negr1	2.58858e-11	0.452463	0.769	0.472	5.30763e-07	r1/r2/r4	negr1
si:dkeyp-86c4.1	2.75993e-11	0.440116	0.455	0.224	5.65896e-07	r1/r2/r4	si:dkeyp-86c4.1
blmh	3.73212e-11	0.471263	0.867	0.63	7.65233e-07	r1/r2/r4	blmh
baz2ba	4.27515e-11	0.394714	0.958	0.878	8.76577e-07	r1/r2/r4	baz2ba
sox3	5.06184e-11	0.372928	0.322	0.129	1.03788e-06	r1/r2/r4	sox3
si:dkey-151g10.3	5.57128e-11	0.55857	0.664	0.451	1.14234e-06	r1/r2/r4	si:dkey-151g10.3
fam167ab	5.91551e-11	0.383171	0.371	0.161	1.21292e-06	r1/r2/r4	fam167ab
egfl6	6.15019e-11	0.437885	0.441	0.217	1.26104e-06	r1/r2/r4	egfl6
shroom3	6.39839e-11	0.507759	0.629	0.38	1.31193e-06	r1/r2/r4	shroom3
celsr1b	7.57785e-11	0.368287	0.818	0.5	1.55376e-06	r1/r2/r4	celsr1b
gpc4	8.28546e-11	0.412783	0.881	0.662	1.69885e-06	r1/r2/r4	gpc4
rrm2.1	9.8339e-11	0.493673	0.881	0.633	2.01634e-06	r1/r2/r4	rrm2.1
zgc:112083	1.10296e-10	0.298782	0.357	0.151	2.26151e-06	r1/r2/r4	zgc:112083
metrn	1.15892e-10	0.408071	0.65	0.402	2.37626e-06	r1/r2/r4	metrn
si:ch211-137a8.4	1.55589e-10	0.387984	0.573	0.315	3.19019e-06	r1/r2/r4	si:ch211-137a8.4
acsl2	1.61276e-10	0.414691	0.615	0.352	3.3068e-06	r1/r2/r4	acsl2
trim71	1.69882e-10	0.482437	0.909	0.754	3.48325e-06	r1/r2/r4	trim71
hip1	1.7122e-10	0.478341	0.811	0.638	3.51069e-06	r1/r2/r4	hip1
crim1	1.80925e-10	0.765568	0.51	0.29	3.70968e-06	r1/r2/r4	crim1
si:dkey-34e4.1	2.27922e-10	0.409561	0.531	0.295	4.6733e-06	r1/r2/r4	si:dkey-34e4.1
ppm1la	2.30551e-10	0.334217	0.273	0.104	4.72722e-06	r1/r2/r4	ppm1la
dbn11	2.38804e-10	0.403468	0.769	0.508	4.89643e-06	r1/r2/r4	dbn1
zeb2a1	4.27555e-10	0.38163	0.923	0.653	8.76658e-06	r1/r2/r4	zeb2a
magi2a	5.71908e-10	0.455601	0.608	0.364	1.17264e-05	r1/r2/r4	magi2a
boc	5.93825e-10	0.497447	0.916	0.779	1.21758e-05	r1/r2/r4	boc
rnf44	6.26119e-10	0.436408	0.874	0.689	1.28379e-05	r1/r2/r4	rnf44
sfrp5	6.69092e-10	0.319821	0.434	0.202	1.37191e-05	r1/r2/r4	sfrp5
phldb1b	7.66713e-10	0.456687	0.79	0.614	1.57207e-05	r1/r2/r4	phldb1b
myclb	8.76569e-10	0.283292	0.315	0.129	1.79732e-05	r1/r2/r4	myclb
fgfr1b	1.32867e-09	0.373112	0.923	0.701	2.72431e-05	r1/r2/r4	fgfr1b
sfrp1a	1.47224e-09	0.327309	0.315	0.135	3.01868e-05	r1/r2/r4	sfrp1a
nrarpb	1.54504e-09	0.291355	0.364	0.167	3.16794e-05	r1/r2/r4	nrarpb
tmem9b	1.57874e-09	0.265594	0.245	0.092	3.23704e-05	r1/r2/r4	tmem9b
pcdh19	1.93313e-09	0.324609	0.972	0.776	3.9637e-05	r1/r2/r4	pcdh19
slc7a7	2.54001e-09	0.368897	0.315	0.137	5.20803e-05	r1/r2/r4	slc7a7
arhgef7a	2.56691e-09	0.379504	0.559	0.326	5.26318e-05	r1/r2/r4	arhgef7a
arhgap24	2.89937e-09	0.273322	0.517	0.286	5.94486e-05	r1/r2/r4	arhgap24
hs3st3b1b	3.76127e-09	0.383035	0.678	0.408	7.7121e-05	r1/r2/r4	hs3st3b1b
nedd9	3.86396e-09	0.3079	0.643	0.389	7.92267e-05	r1/r2/r4	nedd9
mex3b	5.36793e-09	0.360128	0.413	0.215	0.000110064	r1/r2/r4	mex3b
ago1	5.7898e-09	0.400543	0.664	0.443	0.000118714	r1/r2/r4	ago1
sox11a	6.09905e-09	0.371083	0.615	0.368	0.000125055	r1/r2/r4	sox11a
cdca7a	6.38342e-09	0.403456	0.524	0.308	0.000130886	r1/r2/r4	cdca7a
rerea	7.30301e-09	0.37212	0.965	0.844	0.000149741	r1/r2/r4	rerea
si:dkey-49n23.1	7.36474e-09	0.41427	0.448	0.231	0.000151007	r1/r2/r4	si:dkey-49n23.1
celsr2	7.79779e-09	0.302456	0.42	0.211	0.000159886	r1/r2/r4	celsr2
si:dkey-195m11.8	9.15774e-09	0.455788	0.727	0.499	0.00018777	r1/r2/r4	si:dkey-195m11.8
kirrel3l	1.01047e-08	0.596458	0.706	0.482	0.000207187	r1/r2/r4	kirrel3l
atp8a1	1.06093e-08	0.386922	0.72	0.487	0.000217534	r1/r2/r4	atp8a1
dla	1.19157e-08	0.383468	0.469	0.263	0.00024432	r1/r2/r4	dla
sh2d3ca	1.64461e-08	0.309609	0.399	0.199	0.00033721	r1/r2/r4	sh2d3ca
rbms2b	1.68253e-08	0.460358	0.678	0.448	0.000344986	r1/r2/r4	rbms2b
ctdp1	1.70495e-08	0.429996	0.951	0.842	0.000349582	r1/r2/r4	ctdp1
NPAS3	1.80536e-08	0.409081	0.364	0.182	0.000370171	r1/r2/r4	NPAS3
inavab	1.82394e-08	0.382741	0.587	0.364	0.000373981	r1/r2/r4	inavab
orc6	1.93334e-08	0.280228	0.434	0.223	0.000396412	r1/r2/r4	orc6
fbxo5	2.50299e-08	0.32836	0.699	0.459	0.000513212	r1/r2/r4	fbxo5
vwa7	2.63021e-08	0.257801	0.259	0.105	0.000539298	r1/r2/r4	vwa7
plagl2	2.64124e-08	0.378869	0.895	0.738	0.00054156	r1/r2/r4	plagl2
greb1	2.75788e-08	0.331903	0.874	0.633	0.000565475	r1/r2/r4	greb1
si:ch211-212k18.5	2.90551e-08	0.303272	0.517	0.303	0.000595746	r1/r2/r4	si:ch211-212k18.5
sox13	3.21618e-08	0.342718	0.783	0.528	0.000659446	r1/r2/r4	sox13
mylk3	3.33698e-08	0.462326	0.448	0.247	0.000684213	r1/r2/r4	mylk3
recql4	4.30598e-08	0.342658	0.371	0.19	0.000882898	r1/r2/r4	recql4
cicb	4.64261e-08	0.423363	0.636	0.4	0.00095192	r1/r2/r4	cicb
arhgap32b	4.70174e-08	0.435637	0.706	0.507	0.000964044	r1/r2/r4	arhgap32b
map7d1a	4.70941e-08	0.361864	0.804	0.586	0.000965618	r1/r2/r4	map7d1a
rpa1	5.44002e-08	0.42475	0.692	0.482	0.00111542	r1/r2/r4	rpa1
ulk1b	5.63298e-08	0.319872	0.441	0.237	0.00115499	r1/r2/r4	ulk1b
h2az2b	7.97874e-08	0.328384	0.825	0.613	0.00163596	r1/r2/r4	h2az2b
neo1b	1.01127e-07	0.367376	0.741	0.542	0.00207351	r1/r2/r4	neo1b
ankrd11	1.12361e-07	0.4039	0.937	0.903	0.00230385	r1/r2/r4	ankrd11
uhrf1	1.74117e-07	0.386501	0.608	0.4	0.0035701	r1/r2/r4	uhrf1
rfc2	1.7574e-07	0.301763	0.392	0.21	0.00360337	r1/r2/r4	rfc2
spag9a	1.9513e-07	0.387672	0.755	0.541	0.00400095	r1/r2/r4	spag9a
pola1	2.1187e-07	0.435223	0.776	0.575	0.00434418	r1/r2/r4	pola1
pbx3b	2.19413e-07	0.284536	0.413	0.219	0.00449884	r1/r2/r4	pbx3b
usp54a	2.20003e-07	0.324261	0.727	0.521	0.00451093	r1/r2/r4	usp54a
skib	2.22588e-07	0.31755	0.517	0.314	0.00456395	r1/r2/r4	skib
hpca	2.41865e-07	0.310322	0.462	0.257	0.0049592	r1/r2/r4	hpca
aspg	2.44216e-07	0.26128	0.336	0.168	0.00500741	r1/r2/r4	aspg
b4galnt4a	2.55379e-07	0.27418	0.287	0.133	0.0052363	r1/r2/r4	b4galnt4a
notch3	2.6564e-07	0.313008	0.853	0.686	0.00544669	r1/r2/r4	notch3
dtl	3.50169e-07	0.33669	0.587	0.389	0.00717986	r1/r2/r4	dtl
rras2	4.02249e-07	0.427262	0.531	0.34	0.00824771	r1/r2/r4	rras2
wasf3b1	4.07117e-07	0.372728	0.734	0.536	0.00834753	r1/r2/r4	wasf3b
tnika	5.06255e-07	0.366952	0.517	0.319	0.0103803	r1/r2/r4	tnika
zranb3	5.50279e-07	0.353707	0.538	0.35	0.0112829	r1/r2/r4	zranb3
lig1	7.47954e-07	0.315926	0.818	0.597	0.0153361	r1/r2/r4	lig1
chaf1a	7.57858e-07	0.307369	0.825	0.678	0.0155391	r1/r2/r4	chaf1a
racgap1	7.58146e-07	0.327422	0.503	0.316	0.015545	r1/r2/r4	racgap1
lbr	8.04357e-07	0.293107	0.678	0.46	0.0164925	r1/r2/r4	lbr
itga6a	8.48238e-07	0.29984	0.51	0.318	0.0173923	r1/r2/r4	itga6a
cyfip2	9.29107e-07	0.274951	0.476	0.278	0.0190504	r1/r2/r4	cyfip2
mms22l	9.89242e-07	0.287418	0.266	0.127	0.0202834	r1/r2/r4	mms22l
arhgap21a	1.05872e-06	0.304868	0.552	0.35	0.021708	r1/r2/r4	arhgap21a
cdc25b	1.12867e-06	0.330421	0.608	0.422	0.0231423	r1/r2/r4	cdc25b
hmgn2	1.22889e-06	0.27746	0.72	0.512	0.0251972	r1/r2/r4	hmgn2
dock4b	1.3409e-06	0.332102	0.636	0.446	0.0274938	r1/r2/r4	dock4b
rpa2	1.37472e-06	0.254893	0.336	0.175	0.0281873	r1/r2/r4	rpa2
baz1b	1.39846e-06	0.338539	0.776	0.59	0.028674	r1/r2/r4	baz1b
cdk2	1.40226e-06	0.284405	0.308	0.156	0.0287519	r1/r2/r4	cdk2
msna	1.4651e-06	0.250138	0.559	0.352	0.0300405	r1/r2/r4	msna
scmh1	1.51969e-06	0.251873	0.371	0.204	0.0311597	r1/r2/r4	scmh1
si:dkey-28i19.1	1.63715e-06	0.296626	0.517	0.333	0.0335682	r1/r2/r4	si:dkey-28i19.1
ipo11	1.90768e-06	0.325413	0.811	0.69	0.0391151	r1/r2/r4	ipo11
esco2	1.91702e-06	0.272577	0.392	0.219	0.0393067	r1/r2/r4	esco2
taf4a	1.98681e-06	0.287797	0.42	0.249	0.0407375	r1/r2/r4	taf4a
plekha7b	2.12417e-06	0.259517	0.573	0.369	0.043554	r1/r2/r4	plekha7b
cxadr	2.18449e-06	0.267154	0.762	0.55	0.0447909	r1/r2/r4	cxadr
hephl1a	2.76752e-06	0.257102	0.455	0.268	0.0567452	r1/r2/r4	hephl1a
si:dkeyp-120h9.1	3.33626e-06	0.266035	0.476	0.289	0.0684067	r1/r2/r4	si:dkeyp-120h9.1
si:dkeyp-68b7.5	3.5948e-06	0.269122	0.51	0.326	0.0737078	r1/r2/r4	si:dkeyp-68b7.5
rapgef2	3.64871e-06	0.382458	0.706	0.559	0.0748131	r1/r2/r4	rapgef2
rad18	4.03342e-06	0.323456	0.65	0.436	0.0827013	r1/r2/r4	rad18
slc44a5b	4.30823e-06	0.355908	0.455	0.294	0.0883359	r1/r2/r4	slc44a5b
adamts18	4.64316e-06	0.286827	0.336	0.183	0.0952033	r1/r2/r4	adamts18
hells	4.91963e-06	0.389299	0.608	0.431	0.100872	r1/r2/r4	hells
mcm6	5.44173e-06	0.309671	0.566	0.372	0.111577	r1/r2/r4	mcm6
lrp5	5.46699e-06	0.364523	0.839	0.743	0.112095	r1/r2/r4	lrp5
eme1	5.47933e-06	0.258644	0.559	0.365	0.112348	r1/r2/r4	eme1
prim2	5.64521e-06	0.402115	0.748	0.568	0.115749	r1/r2/r4	prim2
mxd3	5.86874e-06	0.296504	0.51	0.316	0.120333	r1/r2/r4	mxd3
ints8	6.15861e-06	0.305835	0.937	0.897	0.126276	r1/r2/r4	ints8
wdhd1	6.7968e-06	0.257981	0.538	0.345	0.139362	r1/r2/r4	wdhd1
acsl3b	7.06765e-06	0.299581	0.434	0.281	0.144915	r1/r2/r4	acsl3b
rai14	7.36684e-06	0.252594	0.545	0.359	0.15105	r1/r2/r4	rai14
sobpb	8.76213e-06	0.283102	0.441	0.275	0.179659	r1/r2/r4	sobpb
top2a	9.20575e-06	0.310689	0.657	0.465	0.188755	r1/r2/r4	top2a
abi2b	9.28699e-06	0.293731	0.594	0.422	0.19042	r1/r2/r4	abi2b
anapc1	9.39692e-06	0.277771	0.727	0.572	0.192674	r1/r2/r4	anapc1
acvr2bb	1.03986e-05	0.315579	0.636	0.468	0.213213	r1/r2/r4	acvr2bb
zgc:110540	1.12063e-05	0.25019	0.336	0.185	0.229775	r1/r2/r4	zgc:110540
kcnk5a	1.24219e-05	0.30938	0.434	0.271	0.254699	r1/r2/r4	kcnk5a
fbxl6	1.25302e-05	0.261462	0.699	0.524	0.256919	r1/r2/r4	fbxl6
nck2b	1.32316e-05	0.281695	0.881	0.821	0.271301	r1/r2/r4	nck2b
mcm3	1.35248e-05	0.301737	0.51	0.334	0.277312	r1/r2/r4	mcm3
her8a	1.43849e-05	0.254573	0.364	0.212	0.294949	r1/r2/r4	her8a
ccne2	1.44979e-05	0.373627	0.664	0.463	0.297265	r1/r2/r4	ccne2
brd3b	1.60875e-05	0.265175	0.811	0.627	0.329859	r1/r2/r4	brd3b
NAV1	1.61127e-05	0.296409	0.741	0.545	0.330375	r1/r2/r4	NAV1
hs2st1b	1.6551e-05	0.355319	0.622	0.481	0.339362	r1/r2/r4	hs2st1b
wwc3	1.70798e-05	0.465432	0.573	0.441	0.350204	r1/r2/r4	wwc3
sinhcafl.1	1.71472e-05	0.29784	0.587	0.433	0.351587	r1/r2/r4	sinhcafl.1
kntc1	1.7199e-05	0.25241	0.462	0.303	0.352648	r1/r2/r4	kntc1
ncalda	1.9049e-05	0.31984	0.741	0.605	0.39058	r1/r2/r4	ncalda
rgl1	1.99428e-05	0.257621	0.594	0.412	0.408908	r1/r2/r4	rgl1
phf21ab	2.15054e-05	0.27991	0.601	0.452	0.440947	r1/r2/r4	phf21ab
si:ch211-269k10.2	2.30486e-05	0.337887	0.594	0.426	0.472589	r1/r2/r4	si:ch211-269k10.2
kpnb3	2.60156e-05	0.335462	0.734	0.58	0.533424	r1/r2/r4	kpnb3
stim2b	2.62545e-05	0.250964	0.42	0.26	0.538323	r1/r2/r4	stim2b
cenpf	2.82609e-05	0.350574	0.517	0.342	0.579462	r1/r2/r4	cenpf
il11ra	3.3252e-05	0.418828	0.483	0.348	0.6818	r1/r2/r4	il11ra
hira	3.48461e-05	0.270411	0.629	0.458	0.714484	r1/r2/r4	hira
nos1apa.1	3.82824e-05	0.272211	0.867	0.694	0.784942	r1/r2/r4	nos1apa.1
rb1	3.8624e-05	0.353279	0.58	0.439	0.791947	r1/r2/r4	rb1
aff21	3.8835e-05	0.267376	0.636	0.453	0.796272	r1/r2/r4	aff2
shcbp1	4.07977e-05	0.257487	0.336	0.199	0.836517	r1/r2/r4	shcbp1
arhgap35a	4.1214e-05	0.282702	0.944	0.882	0.845051	r1/r2/r4	arhgap35a
cdh7a1	4.47341e-05	0.379445	0.413	0.262	0.917229	r1/r2/r4	cdh7a
si:dkey-157g16.6	4.55961e-05	0.251296	0.49	0.331	0.934903	r1/r2/r4	si:dkey-157g16.6
fmnl3	5.21019e-05	0.320154	0.636	0.489	1	r1/r2/r4	fmnl3
CT027815.1	6.27152e-05	0.255925	0.587	0.423	1	r1/r2/r4	CT027815.1
rttn	6.42291e-05	0.273978	0.49	0.331	1	r1/r2/r4	rttn
chd2	6.85599e-05	0.250346	0.881	0.737	1	r1/r2/r4	chd2
adarb1b	7.15176e-05	0.255084	0.867	0.757	1	r1/r2/r4	adarb1b
arhgef18a	7.1794e-05	0.257091	0.427	0.274	1	r1/r2/r4	arhgef18a
si:ch211-153a8.4	7.19927e-05	0.287388	0.594	0.421	1	r1/r2/r4	si:ch211-153a8.4
cemip2	7.42826e-05	0.319616	0.601	0.461	1	r1/r2/r4	cemip2
fzd3a	7.5295e-05	0.265276	0.671	0.498	1	r1/r2/r4	fzd3a
SEMA4F	8.00043e-05	0.324866	0.503	0.363	1	r1/r2/r4	SEMA4F
sort1a	8.33407e-05	0.32182	0.399	0.266	1	r1/r2/r4	sort1a
smarcd1	0.000111116	0.26663	0.671	0.542	1	r1/r2/r4	smarcd1
ipo7	0.000116527	0.25707	0.979	0.918	1	r1/r2/r4	ipo7
ntn1a	0.000132863	0.834342	0.524	0.421	1	r1/r2/r4	ntn1a
pole	0.000144873	0.27418	0.566	0.407	1	r1/r2/r4	pole
arhgap29b	0.000151591	0.263428	0.49	0.342	1	r1/r2/r4	arhgap29b
nav3	0.000155669	0.296821	0.252	0.141	1	r1/r2/r4	nav3
kif14	0.000162162	0.255351	0.469	0.323	1	r1/r2/r4	kif14
stag1a	0.000164038	0.285373	0.629	0.486	1	r1/r2/r4	stag1a
pcca	0.000167606	0.272789	0.517	0.381	1	r1/r2/r4	pcca
pkn1a	0.000199044	0.263818	0.629	0.5	1	r1/r2/r4	pkn1a
slx4ip	0.000217403	0.289637	0.476	0.336	1	r1/r2/r4	slx4ip
e2f3	0.000219056	0.262687	0.762	0.656	1	r1/r2/r4	e2f3
mybl2b	0.000239772	0.26003	0.364	0.235	1	r1/r2/r4	mybl2b
mcm5	0.000253236	0.306458	0.552	0.408	1	r1/r2/r4	mcm5
rin2	0.000271287	0.25327	0.629	0.485	1	r1/r2/r4	rin2
nasp	0.000290286	0.303879	0.517	0.378	1	r1/r2/r4	nasp
mcm4	0.000315573	0.254838	0.51	0.361	1	r1/r2/r4	mcm4
tgfbr2b	0.000360809	0.269318	0.238	0.132	1	r1/r2/r4	tgfbr2b
etv4	0.00037668	0.361736	0.434	0.296	1	r1/r2/r4	etv4
carm1	0.000419474	0.251234	0.741	0.623	1	r1/r2/r4	carm1
smc1al	0.000456693	0.272669	0.832	0.716	1	r1/r2/r4	smc1al
clic4	0.000504059	0.250179	0.65	0.499	1	r1/r2/r4	clic4
kat7b	0.00060681	0.250786	0.517	0.379	1	r1/r2/r4	kat7b
cenpi	0.000632067	0.286898	0.573	0.467	1	r1/r2/r4	cenpi
ptch1	0.000676881	0.253161	0.671	0.551	1	r1/r2/r4	ptch1
fam168b	0.000991422	0.257473	0.545	0.419	1	r1/r2/r4	fam168b
nsd3	0.00136728	0.25179	0.664	0.57	1	r1/r2/r4	nsd3
zgc:153115	0.00162039	0.256231	0.559	0.464	1	r1/r2/r4	zgc:153115
ccnf	0.00164776	0.269005	0.608	0.486	1	r1/r2/r4	ccnf
serinc51	0.00181088	0.263963	0.713	0.618	1	r1/r2/r4	serinc5
lin28b	0.00289963	0.252225	0.671	0.584	1	r1/r2/r4	lin28b
cep131	0.00536939	0.46021	0.503	0.403	1	r1/r2/r4	cep131
pax5	1.08426e-163	2.78101	0.912	0.101	2.22316e-159	MHB.1	pax5
pax2a	1.66783e-110	2.4375	0.963	0.193	3.41973e-106	MHB.1	pax2a
pax2b	8.98827e-98	1.99756	0.757	0.122	1.84295e-93	MHB.1	pax2b
en2b	6.10912e-77	1.28118	0.603	0.083	1.25261e-72	MHB.1	en2b
jag2b1	2.2808e-51	1.47675	0.993	0.679	4.67656e-47	MHB.1	jag2b
gas7a	2.62376e-51	1.0684	0.772	0.223	5.37975e-47	MHB.1	gas7a
st8sia21	1.52696e-42	0.978007	0.816	0.291	3.13087e-38	MHB.1	st8sia2
nrp2a1	5.18642e-40	1.10373	0.625	0.176	1.06342e-35	MHB.1	nrp2a
ptprnb	1.29697e-38	1.03868	0.824	0.303	2.65931e-34	MHB.1	ptprnb
il17rd	4.28716e-38	1.07079	0.86	0.359	8.79039e-34	MHB.1	il17rd
ptprna	2.3108e-37	0.823582	0.485	0.113	4.73807e-33	MHB.1	ptprna
rfx41	5.64986e-37	1.09996	0.956	0.438	1.15845e-32	MHB.1	rfx4
zbtb16a2	2.19043e-36	1.01474	1	0.894	4.49126e-32	MHB.1	zbtb16a
negr11	3.54489e-35	1.05901	0.919	0.464	7.26845e-31	MHB.1	negr1
etv41	3.19844e-33	0.99831	0.728	0.279	6.55808e-29	MHB.1	etv4
lmx1bb	3.32062e-33	0.958792	0.706	0.237	6.80859e-29	MHB.1	lmx1bb
ptprn21	5.58501e-31	0.887006	0.919	0.439	1.14515e-26	MHB.1	ptprn2
efna2a	9.30251e-31	1.29407	0.919	0.566	1.90739e-26	MHB.1	efna2a
si:ch211-286o17.11	5.29194e-30	1.06087	0.743	0.311	1.08506e-25	MHB.1	si:ch211-286o17.1
meis2a1	1.48254e-29	0.546833	0.596	0.183	3.03981e-25	MHB.1	meis2a
adgrl3.11	7.56115e-29	0.98993	0.684	0.268	1.55034e-24	MHB.1	adgrl3.1
gbx2	1.3903e-28	0.277362	0.162	0.015	2.85066e-24	MHB.1	gbx2
nell2a	1.66544e-28	0.374961	0.243	0.036	3.41481e-24	MHB.1	nell2a
lamb2l1	2.16945e-28	0.739463	0.684	0.249	4.44823e-24	MHB.1	lamb2l
lrig11	5.93855e-28	0.888375	0.934	0.634	1.21764e-23	MHB.1	lrig1
efna5a	6.60203e-28	0.871761	0.971	0.673	1.35368e-23	MHB.1	efna5a
ism1	2.21406e-27	0.411486	0.279	0.048	4.53971e-23	MHB.1	ism1
si:ch211-216b21.2	7.36594e-27	0.822519	0.346	0.077	1.51031e-22	MHB.1	si:ch211-216b21.2
hs3st3b1b1	1.78759e-26	0.950885	0.831	0.4	3.66527e-22	MHB.1	hs3st3b1b
adgrv11	2.77847e-26	0.962894	0.949	0.592	5.69698e-22	MHB.1	adgrv1
s1pr21	4.51698e-26	0.932399	0.86	0.494	9.26161e-22	MHB.1	s1pr2
qkib	7.57105e-26	0.809242	0.625	0.233	1.55237e-21	MHB.1	qkib
trim2b	2.31853e-25	0.376718	0.257	0.045	4.75391e-21	MHB.1	trim2b
fam189a11	3.28089e-25	1.04249	0.544	0.189	6.72714e-21	MHB.1	fam189a1
en2a	7.02495e-25	0.35939	0.228	0.036	1.4404e-20	MHB.1	en2a
notum1a	5.94349e-24	0.649951	0.36	0.09	1.21865e-19	MHB.1	notum1a
fat3a1	1.86554e-23	0.725698	0.963	0.641	3.8251e-19	MHB.1	fat3a
vwa71	2.36545e-23	0.511172	0.375	0.099	4.85011e-19	MHB.1	vwa7
tet31	5.8528e-23	0.831691	0.904	0.553	1.20006e-18	MHB.1	tet3
si:dkey-217l24.1	2.05151e-22	0.54404	0.515	0.177	4.20642e-18	MHB.1	si:dkey-217l24.1
plxdc21	8.16338e-22	0.727092	0.801	0.406	1.67382e-17	MHB.1	plxdc2
tenm4	2.21581e-21	0.798125	0.963	0.704	4.54329e-17	MHB.1	tenm4
zbtb16b	7.13909e-21	0.703941	0.949	0.626	1.4638e-16	MHB.1	zbtb16b
plekhh11	7.72746e-21	0.755625	0.919	0.654	1.58444e-16	MHB.1	plekhh1
scube21	7.83507e-21	0.940859	0.735	0.392	1.6065e-16	MHB.1	scube2
sesn3	2.04816e-20	0.659583	0.368	0.11	4.19955e-16	MHB.1	sesn3
CR356242.11	3.74993e-20	0.741006	0.441	0.148	7.68885e-16	MHB.1	CR356242.1
nova21	5.48211e-20	0.735327	0.985	0.664	1.12405e-15	MHB.1	nova2
ncam1a1	1.44821e-19	0.751095	0.949	0.591	2.96942e-15	MHB.1	ncam1a
greb11	1.54152e-19	0.68982	0.904	0.632	3.16073e-15	MHB.1	greb1
zeb1b1	3.41174e-19	0.725131	0.993	0.768	6.99543e-15	MHB.1	zeb1b
frmpd3	2.46156e-18	0.473908	0.257	0.062	5.04718e-14	MHB.1	frmpd3
pax7a	8.0474e-18	0.518165	0.324	0.088	1.65004e-13	MHB.1	pax7a
mdkb1	1.47062e-17	0.53767	0.669	0.325	3.01536e-13	MHB.1	mdkb
arhgef10lb1	2.35957e-17	0.530017	0.537	0.223	4.83806e-13	MHB.1	arhgef10lb
NAV11	5.00608e-17	0.769426	0.838	0.54	1.02645e-12	MHB.1	NAV1
srgap1a	9.81706e-17	0.706486	0.912	0.702	2.01289e-12	MHB.1	srgap1a
pou3f3b	1.15205e-16	0.369707	0.36	0.115	2.36216e-12	MHB.1	pou3f3b
si:ch73-386h18.1	1.74083e-16	0.625799	0.75	0.441	3.5694e-12	MHB.1	si:ch73-386h18.1
kif21b	1.76151e-16	0.551206	0.485	0.2	3.6118e-12	MHB.1	kif21b
spry2	1.96411e-16	0.378789	0.493	0.197	4.02721e-12	MHB.1	spry2
tenm3	6.72576e-16	0.630756	0.919	0.648	1.37905e-11	MHB.1	tenm3
plch11	8.33576e-16	0.611825	0.963	0.595	1.70916e-11	MHB.1	plch1
gfap	9.89235e-16	0.391998	0.375	0.129	2.02833e-11	MHB.1	gfap
ctnnd2b1	1.15931e-15	0.534139	0.801	0.446	2.37705e-11	MHB.1	ctnnd2b
cldn5a	1.17747e-15	0.454307	0.515	0.22	2.41429e-11	MHB.1	cldn5a
cdh7a2	1.36473e-15	0.469149	0.588	0.252	2.79824e-11	MHB.1	cdh7a
ank2b1	1.63037e-15	0.540934	0.816	0.511	3.34291e-11	MHB.1	ank2b
sox131	1.72759e-15	0.571663	0.86	0.524	3.54224e-11	MHB.1	sox13
msi11	4.01228e-15	0.542824	0.897	0.565	8.22677e-11	MHB.1	msi1
col18a1a	5.49384e-15	0.574782	0.949	0.69	1.12646e-10	MHB.1	col18a1a
plp1a1	1.29813e-14	0.469128	0.559	0.243	2.66168e-10	MHB.1	plp1a
si:ch211-284f22.3	1.64236e-14	0.56658	0.691	0.381	3.3675e-10	MHB.1	si:ch211-284f22.3
pax3b1	2.41772e-14	0.507574	0.375	0.139	4.95729e-10	MHB.1	pax3b
cpm	2.67496e-14	0.404257	0.331	0.113	5.48474e-10	MHB.1	cpm
rasal21	6.67754e-14	0.547326	0.941	0.765	1.36916e-09	MHB.1	rasal2
ppp1r14ab	7.55743e-14	0.272416	0.235	0.063	1.54957e-09	MHB.1	ppp1r14ab
sb:cb81	7.98009e-14	0.456087	0.471	0.205	1.63624e-09	MHB.1	sb:cb81
spred2a	8.38607e-14	0.531937	0.728	0.447	1.71948e-09	MHB.1	spred2a
her8a1	9.11818e-14	0.3796	0.478	0.206	1.86959e-09	MHB.1	her8a
celsr1b1	9.62308e-14	0.472679	0.868	0.498	1.97312e-09	MHB.1	celsr1b
prkd2	3.09591e-13	0.4147	0.544	0.261	6.34785e-09	MHB.1	prkd2
ndst31	5.36134e-13	0.368592	0.61	0.285	1.09929e-08	MHB.1	ndst3
tox1	8.9072e-13	0.541074	0.971	0.746	1.82633e-08	MHB.1	tox
jarid2b	9.19556e-13	0.46788	1	0.969	1.88546e-08	MHB.1	jarid2b
shroom31	1.22452e-12	0.497355	0.684	0.377	2.51075e-08	MHB.1	shroom3
sema5ba1	1.69213e-12	0.53324	0.566	0.279	3.46955e-08	MHB.1	sema5ba
nav2b	1.7864e-12	0.633336	0.735	0.478	3.66283e-08	MHB.1	nav2b
zeb2b1	1.95314e-12	0.315763	0.478	0.207	4.00473e-08	MHB.1	zeb2b
spry4	2.50543e-12	0.302348	0.463	0.2	5.13714e-08	MHB.1	spry4
ankrd111	2.96216e-12	0.491035	0.956	0.902	6.07361e-08	MHB.1	ankrd11
her31	3.13453e-12	0.253705	0.221	0.061	6.42705e-08	MHB.1	her3
pvrl2l1	3.78818e-12	0.521972	0.86	0.563	7.76729e-08	MHB.1	pvrl2l
brsk2b	3.82127e-12	0.420395	0.471	0.215	7.83513e-08	MHB.1	brsk2b
ulk1b1	4.64737e-12	0.456404	0.493	0.235	9.52897e-08	MHB.1	ulk1b
mdka	6.23325e-12	0.547869	0.647	0.36	1.27807e-07	MHB.1	mdka
auts2a	7.55392e-12	0.485086	0.809	0.574	1.54886e-07	MHB.1	auts2a
foxp4	1.04787e-11	0.480204	0.971	0.806	2.14855e-07	MHB.1	foxp4
efna3b	1.19072e-11	0.520175	0.728	0.467	2.44144e-07	MHB.1	efna3b
lrp2a1	1.28972e-11	0.446009	0.838	0.518	2.64444e-07	MHB.1	lrp2a
kaznb1	1.75782e-11	0.477876	0.684	0.398	3.60424e-07	MHB.1	kaznb
onecut2	1.96135e-11	0.271087	0.228	0.069	4.02154e-07	MHB.1	onecut2
chrm4a	2.14777e-11	0.37364	0.235	0.077	4.40378e-07	MHB.1	chrm4a
stra6	2.31183e-11	0.364318	0.243	0.077	4.74018e-07	MHB.1	stra6
plxna31	2.78183e-11	0.408205	0.978	0.908	5.70386e-07	MHB.1	plxna3
tox2	6.08549e-11	0.533431	0.61	0.367	1.24777e-06	MHB.1	tox2
lipeb	8.91418e-11	0.619626	0.456	0.24	1.82776e-06	MHB.1	lipeb
cadm1a1	1.04157e-10	0.417601	0.846	0.54	2.13564e-06	MHB.1	cadm1a
skia1	1.38559e-10	0.4178	0.897	0.643	2.84101e-06	MHB.1	skia
letm11	1.58362e-10	0.364401	0.809	0.506	3.24706e-06	MHB.1	letm1
map7d1a1	1.71995e-10	0.400749	0.846	0.584	3.52658e-06	MHB.1	map7d1a
mex3b1	2.60696e-10	0.3353	0.449	0.213	5.34532e-06	MHB.1	mex3b
zgc:110796	2.63239e-10	0.420038	0.632	0.397	5.39746e-06	MHB.1	zgc:110796
hephl1a1	2.6766e-10	0.419953	0.507	0.266	5.4881e-06	MHB.1	hephl1a
man2a2	3.41925e-10	0.412124	0.647	0.39	7.01084e-06	MHB.1	man2a2
sema3aa	4.56676e-10	0.48777	0.397	0.191	9.36369e-06	MHB.1	sema3aa
lmx1ba	4.9306e-10	0.452298	0.338	0.142	1.01097e-05	MHB.1	lmx1ba
flrt3	6.71765e-10	0.420133	0.493	0.251	1.37739e-05	MHB.1	flrt3
zgc:1531151	7.28163e-10	0.401895	0.684	0.456	1.49303e-05	MHB.1	zgc:153115
foxp1b	7.72488e-10	0.346513	0.809	0.587	1.58391e-05	MHB.1	foxp1b
znf536	7.77574e-10	0.282634	0.265	0.095	1.59434e-05	MHB.1	znf536
mapk1	8.13933e-10	0.566761	0.625	0.415	1.66889e-05	MHB.1	mapk1
nr2f6b	1.05167e-09	0.327831	0.309	0.127	2.15633e-05	MHB.1	nr2f6b
ebf2	2.12934e-09	0.310618	0.353	0.15	4.36599e-05	MHB.1	ebf2
mllt101	2.33225e-09	0.415915	0.985	0.883	4.78205e-05	MHB.1	mllt10
nos1apa.11	4.25362e-09	0.434283	0.875	0.694	8.72162e-05	MHB.1	nos1apa.1
efnb2b	5.81961e-09	0.510583	0.603	0.38	0.000119325	MHB.1	efnb2b
ssbp4	6.42996e-09	0.401596	0.897	0.76	0.00013184	MHB.1	ssbp4
SEMA4F1	6.91754e-09	0.539646	0.574	0.359	0.000141837	MHB.1	SEMA4F
zgc:109889	7.176e-09	0.352539	0.382	0.189	0.000147137	MHB.1	zgc:109889
b4galt2	7.34744e-09	0.260953	0.206	0.07	0.000150652	MHB.1	b4galt2
mapk111	8.38209e-09	0.322672	0.375	0.179	0.000171866	MHB.1	mapk11
cobl	8.99574e-09	0.384398	0.412	0.21	0.000184449	MHB.1	cobl
pdzd2	1.03642e-08	0.382818	0.662	0.415	0.000212507	MHB.1	pdzd2
rnf441	1.16143e-08	0.407781	0.897	0.688	0.00023814	MHB.1	rnf44
rnf220a	1.21529e-08	0.92882	0.618	0.418	0.000249183	MHB.1	rnf220a
lin28a1	1.33283e-08	0.43071	0.772	0.576	0.000273284	MHB.1	lin28a
tiam2a	2.13781e-08	0.369635	0.86	0.702	0.000438337	MHB.1	tiam2a
igdcc4	2.17593e-08	0.384626	0.735	0.484	0.000446153	MHB.1	igdcc4
gpm6bb1	2.36722e-08	0.323369	0.507	0.286	0.000485374	MHB.1	gpm6bb
zmp:0000000936	2.3855e-08	0.360283	0.39	0.193	0.000489122	MHB.1	zmp:0000000936
fhdc1	2.5316e-08	0.331746	0.426	0.22	0.000519079	MHB.1	fhdc1
epb41a1	2.92176e-08	0.411653	0.809	0.549	0.000599078	MHB.1	epb41a
her4.21	3.06474e-08	0.577287	0.522	0.301	0.000628394	MHB.1	her4.2
nap1l1	3.53118e-08	0.392633	0.779	0.596	0.000724034	MHB.1	nap1l1
robo1	3.57582e-08	0.396162	0.956	0.892	0.000733186	MHB.1	robo1
ildr2	3.69786e-08	0.376139	0.596	0.373	0.000758208	MHB.1	ildr2
cspg5a1	4.28314e-08	0.310618	0.507	0.275	0.000878215	MHB.1	cspg5a
ano8b	4.93995e-08	0.313506	0.331	0.159	0.00101289	MHB.1	ano8b
rab11fip3	5.04991e-08	0.319505	0.441	0.238	0.00103543	MHB.1	rab11fip3
efna2b	5.53851e-08	0.257997	0.184	0.063	0.00113562	MHB.1	efna2b
si:dkeyp-120h9.11	6.42335e-08	0.342866	0.493	0.289	0.00131704	MHB.1	si:dkeyp-120h9.1
rbfox3a	6.45773e-08	0.332864	0.463	0.254	0.00132409	MHB.1	rbfox3a
sfrp1a1	6.60671e-08	0.278778	0.309	0.136	0.00135464	MHB.1	sfrp1a
tle3a	6.94487e-08	0.414691	0.669	0.472	0.00142398	MHB.1	tle3a
CABZ01037298.1	7.05994e-08	0.268954	0.39	0.197	0.00144757	MHB.1	CABZ01037298.1
BX284638.21	8.22245e-08	0.32652	0.765	0.5	0.00168593	MHB.1	BX284638.2
znrf3	8.44268e-08	0.427857	0.941	0.859	0.00173109	MHB.1	znrf3
si:ch211-269k10.21	8.82271e-08	0.348359	0.662	0.422	0.00180901	MHB.1	si:ch211-269k10.2
rfx2	9.51297e-08	0.364419	0.765	0.571	0.00195054	MHB.1	rfx2
greb1l2	1.09485e-07	0.418435	0.934	0.768	0.00224488	MHB.1	greb1l
nkd11	1.09576e-07	0.324452	0.676	0.422	0.00224674	MHB.1	nkd1
cad	1.14833e-07	0.333285	0.721	0.487	0.00235453	MHB.1	cad
eif4g3a	1.21535e-07	0.348036	0.574	0.359	0.00249196	MHB.1	eif4g3a
ptprsa.1	1.9403e-07	0.353543	0.912	0.802	0.0039784	MHB.1	ptprsa.1
grb10a	1.96416e-07	0.357667	0.912	0.803	0.00402732	MHB.1	grb10a
celf3a	2.57721e-07	0.458398	0.537	0.355	0.00528431	MHB.1	celf3a
her121	2.82609e-07	0.486064	0.456	0.263	0.00579462	MHB.1	her12
fzd3a1	2.9532e-07	0.413167	0.713	0.496	0.00605523	MHB.1	fzd3a
phf21aa	3.03009e-07	0.295074	0.706	0.456	0.0062129	MHB.1	phf21aa
nat8l1	3.18353e-07	0.406803	0.787	0.594	0.0065275	MHB.1	nat8l
her11	3.33083e-07	0.328077	0.162	0.056	0.00682954	MHB.1	her11
arfgef1	3.53768e-07	0.440507	0.647	0.488	0.00725366	MHB.1	arfgef1
efnb3b1	4.31579e-07	0.308026	0.86	0.665	0.00884909	MHB.1	efnb3b
pax3a1	5.0231e-07	0.331859	0.603	0.379	0.0102994	MHB.1	pax3a
gli2b1	5.0746e-07	0.397603	0.551	0.358	0.010405	MHB.1	gli2b
her4.11	6.62862e-07	0.484639	0.338	0.176	0.0135913	MHB.1	her4.1
notch1b1	7.13493e-07	0.303938	0.772	0.542	0.0146295	MHB.1	notch1b
roraa	7.21377e-07	0.256831	0.176	0.066	0.0147911	MHB.1	roraa
snx33	7.71609e-07	0.282782	0.368	0.198	0.0158211	MHB.1	snx33
serinc52	8.84942e-07	0.386528	0.801	0.613	0.0181448	MHB.1	serinc5
blmh1	1.09337e-06	0.333361	0.831	0.633	0.0224185	MHB.1	blmh
plekha7b1	1.72786e-06	0.347312	0.581	0.369	0.0354281	MHB.1	plekha7b
nup107	1.82781e-06	0.252271	0.493	0.292	0.0374775	MHB.1	nup107
grid2	2.32943e-06	0.375493	0.294	0.146	0.0477627	MHB.1	grid2
slc29a1a	2.36899e-06	0.299551	0.632	0.429	0.0485738	MHB.1	slc29a1a
plagl21	2.45138e-06	0.307007	0.912	0.738	0.050263	MHB.1	plagl2
spred2b	2.55753e-06	0.383145	0.816	0.663	0.0524396	MHB.1	spred2b
oxct1a	2.60054e-06	0.279333	0.551	0.362	0.0533214	MHB.1	oxct1a
eif3s10	2.9121e-06	0.288388	0.956	0.834	0.0597096	MHB.1	eif3s10
pcdh191	3.46788e-06	0.319272	0.934	0.779	0.0711053	MHB.1	pcdh19
adka	3.47376e-06	0.320088	0.897	0.801	0.071226	MHB.1	adka
casz1	3.55068e-06	0.278616	0.221	0.096	0.0728032	MHB.1	casz1
dbn12	3.6797e-06	0.292831	0.735	0.511	0.0754485	MHB.1	dbn1
fut8a	4.33767e-06	0.263365	0.632	0.42	0.0889395	MHB.1	fut8a
arhgef18a1	4.52071e-06	0.255528	0.456	0.273	0.0926927	MHB.1	arhgef18a
si:ch211-212k18.51	4.7053e-06	0.266171	0.485	0.306	0.0964775	MHB.1	si:ch211-212k18.5
dixdc1b	4.77633e-06	0.296677	0.515	0.329	0.097934	MHB.1	dixdc1b
prpf4ba	4.78047e-06	0.285562	0.632	0.44	0.0980188	MHB.1	prpf4ba
srgap3	4.78961e-06	0.376968	0.691	0.554	0.0982061	MHB.1	srgap3
smc1al1	5.90347e-06	0.284712	0.853	0.715	0.121045	MHB.1	smc1al
gng21	6.00625e-06	0.259066	0.257	0.122	0.123152	MHB.1	gng2
tdg.1	6.16775e-06	0.272934	0.559	0.372	0.126464	MHB.1	tdg.1
smarcad1b	6.3674e-06	0.273913	0.346	0.196	0.130557	MHB.1	smarcad1b
dhfr	6.68185e-06	0.27642	0.346	0.191	0.137005	MHB.1	dhfr
pot1	7.1258e-06	0.313035	0.507	0.337	0.146107	MHB.1	pot1
tusc3	7.95421e-06	0.280543	0.574	0.378	0.163093	MHB.1	tusc3
chn1	8.22713e-06	0.31474	0.61	0.451	0.168689	MHB.1	chn1
ipo111	9.04044e-06	0.328705	0.853	0.688	0.185365	MHB.1	ipo11
aff22	9.63333e-06	0.364033	0.618	0.454	0.197522	MHB.1	aff2
pbx3b1	9.94157e-06	0.309663	0.382	0.222	0.203842	MHB.1	pbx3b
rassf2a	1.11689e-05	0.256136	0.515	0.326	0.229007	MHB.1	rassf2a
ctdspl2b	1.33936e-05	0.253995	0.566	0.36	0.274622	MHB.1	ctdspl2b
plce1	1.39852e-05	0.277727	0.463	0.289	0.286752	MHB.1	plce1
acsl21	1.45227e-05	0.297501	0.529	0.358	0.297773	MHB.1	acsl2
ches1	1.52302e-05	0.298623	0.61	0.439	0.31228	MHB.1	ches1
baz1b1	1.53316e-05	0.330103	0.757	0.592	0.314359	MHB.1	baz1b
sema4ab	1.55666e-05	0.322678	0.61	0.439	0.319178	MHB.1	sema4ab
efnb2a	1.62443e-05	0.297179	0.522	0.35	0.333073	MHB.1	efnb2a
bmpr1ba1	1.77738e-05	0.27894	0.757	0.539	0.364435	MHB.1	bmpr1ba
kcnk5a1	1.82004e-05	0.292168	0.434	0.272	0.373181	MHB.1	kcnk5a
adgrl2a1	2.02234e-05	0.281747	0.993	0.917	0.414661	MHB.1	adgrl2a
ror11	2.09239e-05	0.389205	0.721	0.563	0.429025	MHB.1	ror1
naa40.1	2.26908e-05	0.259438	0.449	0.286	0.465253	MHB.1	naa40.1
fbxl61	2.33062e-05	0.328922	0.691	0.525	0.47787	MHB.1	fbxl6
ntn1b	2.38151e-05	0.622745	0.39	0.237	0.488305	MHB.1	ntn1b
tnpo2	2.54033e-05	0.305027	0.684	0.516	0.52087	MHB.1	tnpo2
spag9a1	2.71188e-05	0.313957	0.699	0.545	0.556044	MHB.1	spag9a
cep112	2.74022e-05	0.291709	0.632	0.464	0.561855	MHB.1	cep112
acvr2bb1	3.0638e-05	0.274049	0.64	0.468	0.628201	MHB.1	acvr2bb
trps1	3.41731e-05	0.2603	0.882	0.725	0.700686	MHB.1	trps1
ccdc102a1	3.82189e-05	0.45051	0.537	0.398	0.78364	MHB.1	ccdc102a
rttn1	4.51307e-05	0.27845	0.485	0.332	0.92536	MHB.1	rttn
arhgap29a	4.68528e-05	0.257639	0.676	0.481	0.960669	MHB.1	arhgap29a
FRMD51	5.09131e-05	0.278729	0.5	0.334	1	MHB.1	FRMD5
frmd4ba	6.03307e-05	0.419666	0.75	0.603	1	MHB.1	frmd4ba
immp2l	7.97445e-05	0.295169	0.493	0.323	1	MHB.1	immp2l
fgfr1a	9.04602e-05	0.323667	0.809	0.721	1	MHB.1	fgfr1a
stox2b	9.50192e-05	0.268161	0.588	0.418	1	MHB.1	stox2b
e2f31	0.000112557	0.273036	0.787	0.655	1	MHB.1	e2f3
rrm11	0.00011396	0.320398	0.625	0.468	1	MHB.1	rrm1
ago11	0.000146128	0.265855	0.603	0.447	1	MHB.1	ago1
phf20b	0.000157285	0.261361	0.559	0.4	1	MHB.1	phf20b
banf1	0.000174106	0.27106	0.471	0.329	1	MHB.1	banf1
ncalda1	0.000207717	0.279103	0.765	0.604	1	MHB.1	ncalda
ect2	0.000249659	0.267873	0.544	0.383	1	MHB.1	ect2
rnd3a	0.00025074	0.338289	0.574	0.427	1	MHB.1	rnd3a
ctbp2a	0.000336453	0.294411	0.699	0.563	1	MHB.1	ctbp2a
rrm2	0.000371877	0.384864	0.471	0.33	1	MHB.1	rrm2
arnt2	0.00049393	0.31764	0.779	0.69	1	MHB.1	arnt2
atp2a2b	0.000496463	0.263457	0.676	0.54	1	MHB.1	atp2a2b
tmem198a	0.000513901	0.26511	0.603	0.436	1	MHB.1	tmem198a
plk1	0.000547148	0.292526	0.485	0.362	1	MHB.1	plk1
tshz1	0.000563373	0.27394	0.382	0.26	1	MHB.1	tshz1
mylk31	0.00060095	0.295413	0.382	0.251	1	MHB.1	mylk3
nrip1b	0.000613865	0.286851	0.309	0.196	1	MHB.1	nrip1b
mcm61	0.0006986	0.304	0.5	0.376	1	MHB.1	mcm6
eif1axa	0.000846893	0.253927	0.412	0.283	1	MHB.1	eif1axa
sulf2b1	0.000955088	0.320068	0.184	0.097	1	MHB.1	sulf2b
LIN28A	0.00104791	0.253492	0.36	0.242	1	MHB.1	LIN28A
ntn1a1	0.00105459	0.539925	0.537	0.421	1	MHB.1	ntn1a
triob	0.00178083	0.25469	0.61	0.478	1	MHB.1	triob
her4.2.11	0.00189951	0.275828	0.309	0.196	1	MHB.1	her4.2.1
gli3	0.00457157	0.297907	0.926	0.87	1	MHB.1	gli3
ndst2b	5.3411e-80	2.22938	0.922	0.285	1.09514e-75	MB.1	ndst2b
chl1a	1.50778e-71	1.57289	0.736	0.141	3.09154e-67	MB.1	chl1a
efcc1	5.74044e-71	0.643133	0.403	0.036	1.17702e-66	MB.1	efcc1
crb1	4.54012e-69	1.14133	0.659	0.117	9.30906e-65	MB.1	crb1
helt	1.05991e-64	0.35316	0.194	0.005	2.17324e-60	MB.1	helt
ptprnb1	1.16371e-60	1.44164	0.93	0.299	2.38608e-56	MB.1	ptprnb
dmbx1a	2.75057e-58	0.724287	0.434	0.054	5.63977e-54	MB.1	dmbx1a
stra61	6.03262e-53	1.00844	0.45	0.066	1.23693e-48	MB.1	stra6
efna2a1	5.33638e-52	1.99814	0.961	0.565	1.09417e-47	MB.1	efna2a
plp1a2	2.84636e-49	1.16658	0.775	0.231	5.83617e-45	MB.1	plp1a
tmem47	5.23332e-47	0.773579	0.535	0.111	1.07304e-42	MB.1	tmem47
ncam1a2	1.55141e-45	1.46376	0.992	0.59	3.18102e-41	MB.1	ncam1a
SIPA1	5.52165e-45	0.823088	0.55	0.12	1.13216e-40	MB.1	SIPA1
gria3b	1.10428e-44	0.933323	0.426	0.07	2.26421e-40	MB.1	gria3b
ptprn22	7.60807e-44	1.18998	0.938	0.44	1.55996e-39	MB.1	ptprn2
zbtb16b1	4.36904e-43	1.29408	0.984	0.625	8.95828e-39	MB.1	zbtb16b
ntn1a2	1.82473e-40	1.56871	0.899	0.401	3.74142e-36	MB.1	ntn1a
CABZ01041610.1	9.76866e-40	0.509155	0.295	0.035	2.00297e-35	MB.1	CABZ01041610.1
dmbx1b	8.70716e-38	0.367407	0.24	0.024	1.78532e-33	MB.1	dmbx1b
epha4b1	4.00251e-36	1.25465	0.853	0.37	8.20675e-32	MB.1	epha4b
tet32	1.03285e-34	1.06955	0.953	0.551	2.11776e-30	MB.1	tet3
rfx42	1.09213e-34	1.16362	0.922	0.442	2.2393e-30	MB.1	rfx4
lmo3	1.19501e-34	0.953841	0.659	0.201	2.45025e-30	MB.1	lmo3
wnt11	1.55983e-33	0.71605	0.481	0.113	3.19827e-29	MB.1	wnt11
fgfr2	3.9465e-33	0.940659	0.992	0.834	8.0919e-29	MB.1	fgfr2
celsr1b2	2.26017e-32	0.89623	0.946	0.494	4.63426e-28	MB.1	celsr1b
znrf31	2.32503e-32	1.03878	0.984	0.857	4.76725e-28	MB.1	znrf3
mab21l2	1.29083e-31	0.586509	0.364	0.07	2.64672e-27	MB.1	mab21l2
fgfr3	1.51198e-31	1.81783	0.69	0.316	3.10017e-27	MB.1	fgfr3
nova22	2.22309e-31	1.03169	0.984	0.665	4.55823e-27	MB.1	nova2
zfhx41	5.46904e-30	0.97574	0.977	0.652	1.12137e-25	MB.1	zfhx4
pou3f3b1	6.51366e-30	0.582156	0.45	0.111	1.33556e-25	MB.1	pou3f3b
plxnb1a	3.23914e-28	0.903221	0.736	0.305	6.64152e-24	MB.1	plxnb1a
si:ch73-364h19.11	6.7522e-28	0.690163	0.543	0.163	1.38447e-23	MB.1	si:ch73-364h19.1
wnt4	6.25611e-27	0.951995	0.45	0.123	1.28275e-22	MB.1	wnt4
plxna1a	7.82608e-26	1.1655	0.876	0.572	1.60466e-21	MB.1	plxna1a
dhx32b	3.21965e-25	0.479483	0.465	0.129	6.60157e-21	MB.1	dhx32b
mbd3b	4.36929e-25	0.944941	0.907	0.619	8.95879e-21	MB.1	mbd3b
robo2	5.7908e-25	0.300376	0.264	0.046	1.18735e-20	MB.1	robo2
gdf11	1.5496e-24	0.668891	0.62	0.238	3.17731e-20	MB.1	gdf11
pou3f3a	4.59051e-24	0.375907	0.279	0.054	9.41238e-20	MB.1	pou3f3a
arhgap21a1	4.96377e-24	0.824038	0.729	0.341	1.01777e-19	MB.1	arhgap21a
SAMD5	5.27529e-24	0.665374	0.465	0.138	1.08165e-19	MB.1	SAMD5
rnf220a1	1.70532e-23	1.16613	0.767	0.41	3.49658e-19	MB.1	rnf220a
msi12	2.89462e-23	0.78134	0.938	0.564	5.93514e-19	MB.1	msi1
vegfc	5.2546e-23	0.464738	0.349	0.084	1.0774e-18	MB.1	vegfc
zbtb16a3	6.18105e-23	0.789893	1	0.894	1.26736e-18	MB.1	zbtb16a
st8sia22	8.24296e-23	0.674641	0.713	0.298	1.69014e-18	MB.1	st8sia2
ncam1b1	4.52634e-22	0.867666	0.636	0.254	9.28082e-18	MB.1	ncam1b
otx2b	8.162e-22	0.36003	0.287	0.061	1.67354e-17	MB.1	otx2b
sh2d3ca1	1.23777e-21	0.507339	0.543	0.192	2.53792e-17	MB.1	sh2d3ca
pvrl2l2	1.3499e-21	0.892467	0.907	0.561	2.76784e-17	MB.1	pvrl2l
greb12	7.98807e-21	0.740166	0.93	0.632	1.63787e-16	MB.1	greb1
tox4	8.09114e-21	0.705232	0.984	0.745	1.65901e-16	MB.1	tox
dock3	9.11283e-21	0.641253	0.465	0.163	1.86849e-16	MB.1	dock3
gfap1	1.0951e-20	0.479997	0.419	0.128	2.2454e-16	MB.1	gfap
blmh2	1.44946e-20	0.656032	0.922	0.629	2.97196e-16	MB.1	blmh
spsb4a1	2.54187e-20	0.83501	0.922	0.635	5.21184e-16	MB.1	spsb4a
col28a2a	2.8637e-20	0.263415	0.295	0.065	5.87174e-16	MB.1	col28a2a
si:ch73-386h18.11	3.52389e-20	0.702315	0.791	0.439	7.22539e-16	MB.1	si:ch73-386h18.1
rbp5	5.4968e-20	0.399536	0.31	0.076	1.12706e-15	MB.1	rbp5
eml1	7.88606e-20	0.510072	0.442	0.143	1.61696e-15	MB.1	eml1
zfpm2b	1.31779e-19	0.417097	0.295	0.069	2.702e-15	MB.1	zfpm2b
si:ch211-286o17.12	3.51399e-19	0.796942	0.69	0.316	7.20508e-15	MB.1	si:ch211-286o17.1
her4.22	3.64136e-19	0.959814	0.667	0.294	7.46624e-15	MB.1	her4.2
robo2.1	7.52697e-19	0.408261	0.295	0.072	1.54333e-14	MB.1	robo2.1
cspg5a2	8.97054e-19	0.559151	0.651	0.268	1.83932e-14	MB.1	cspg5a
cadm1a2	9.89892e-19	0.67748	0.907	0.537	2.02968e-14	MB.1	cadm1a
nr2f21	1.09785e-18	0.7187	0.659	0.314	2.25102e-14	MB.1	nr2f2
ephb4b1	1.11011e-18	0.643934	0.628	0.287	2.27616e-14	MB.1	ephb4b
jag2b2	2.13317e-18	0.712439	0.977	0.68	4.37384e-14	MB.1	jag2b
lrp2a2	5.12319e-18	0.63132	0.876	0.517	1.05046e-13	MB.1	lrp2a
her4.2.12	7.68799e-18	0.775081	0.488	0.186	1.57635e-13	MB.1	her4.2.1
plch12	2.23755e-17	0.604815	0.969	0.596	4.58787e-13	MB.1	plch1
BX284638.22	4.37427e-17	0.635583	0.829	0.497	8.969e-13	MB.1	BX284638.2
nrxn3a	5.27173e-17	0.538678	0.372	0.117	1.08092e-12	MB.1	nrxn3a
epb41a2	7.85806e-17	0.617581	0.876	0.546	1.61122e-12	MB.1	epb41a
brsk2b1	8.84247e-17	0.655551	0.519	0.213	1.81306e-12	MB.1	brsk2b
syne1b	1.23217e-16	0.40726	0.372	0.119	2.52643e-12	MB.1	syne1b
pou3f2b	1.65124e-16	0.360352	0.302	0.085	3.3857e-12	MB.1	pou3f2b
hs3st3b1b2	5.69124e-16	0.714255	0.744	0.406	1.16693e-11	MB.1	hs3st3b1b
foxp41	8.67409e-16	0.665241	0.969	0.807	1.77853e-11	MB.1	foxp4
otx1	1.41039e-15	0.402304	0.357	0.117	2.89187e-11	MB.1	otx1
mdka1	2.4055e-15	0.575728	0.69	0.359	4.93223e-11	MB.1	mdka
tet2	3.2976e-15	0.627031	0.736	0.422	6.7614e-11	MB.1	tet2
ptch11	1.16238e-14	0.670435	0.814	0.544	2.38335e-10	MB.1	ptch1
myh141	1.41806e-14	0.613161	0.55	0.256	2.9076e-10	MB.1	myh14
ntn1b1	1.89064e-14	0.758175	0.519	0.23	3.87657e-10	MB.1	ntn1b
zeb1b2	2.74799e-14	0.547793	0.969	0.77	5.63448e-10	MB.1	zeb1b
nfasca	3.33879e-14	0.353916	0.419	0.153	6.84585e-10	MB.1	nfasca
tenm41	3.43378e-14	0.618086	0.953	0.706	7.04063e-10	MB.1	tenm4
otx2a	8.82705e-14	0.336968	0.372	0.128	1.8099e-09	MB.1	otx2a
map7d1a2	1.06095e-13	0.569754	0.853	0.584	2.17537e-09	MB.1	map7d1a
vwa72	1.11132e-13	0.399695	0.318	0.103	2.27864e-09	MB.1	vwa7
mapk112	1.28072e-13	0.36653	0.442	0.176	2.62598e-09	MB.1	mapk11
negr12	2.27253e-13	0.481552	0.814	0.472	4.65959e-09	MB.1	negr1
gas7a1	3.05996e-13	0.468443	0.535	0.238	6.27414e-09	MB.1	gas7a
ngfb	3.67759e-13	0.439652	0.388	0.145	7.54053e-09	MB.1	ngfb
nav2a	4.26963e-13	0.586837	0.76	0.478	8.75445e-09	MB.1	nav2a
sema5ba2	6.21292e-13	0.554674	0.581	0.279	1.2739e-08	MB.1	sema5ba
nr2e1	6.98594e-13	0.277752	0.147	0.029	1.4324e-08	MB.1	nr2e1
enox1	8.77187e-13	0.416766	0.256	0.077	1.79858e-08	MB.1	enox1
nsd21	9.35541e-13	0.456165	0.822	0.553	1.91823e-08	MB.1	nsd2
arhgef10lb2	9.36981e-13	0.510589	0.488	0.226	1.92119e-08	MB.1	arhgef10lb
skia2	3.1852e-12	0.461906	0.907	0.643	6.53094e-08	MB.1	skia
sulf2a	5.2137e-12	0.469784	0.248	0.077	1.06902e-07	MB.1	sulf2a
ank2b2	5.60489e-12	0.527842	0.822	0.511	1.14923e-07	MB.1	ank2b
DOCK4	6.30903e-12	0.338071	0.333	0.122	1.2936e-07	MB.1	DOCK4
pdgfbb	7.02296e-12	0.356039	0.287	0.095	1.43999e-07	MB.1	pdgfbb
plekha7b2	8.79004e-12	0.43885	0.659	0.366	1.80231e-07	MB.1	plekha7b
cntfr1	9.46206e-12	0.284774	0.969	0.688	1.9401e-07	MB.1	cntfr
si:ch211-168f7.51	9.97918e-12	0.461178	0.775	0.465	2.04613e-07	MB.1	si:ch211-168f7.5
her15.21	1.00994e-11	0.585171	0.566	0.295	2.07079e-07	MB.1	her15.2
itga6a1	1.04024e-11	0.356881	0.612	0.313	2.13291e-07	MB.1	itga6a
her4.41	1.23498e-11	0.326676	0.372	0.143	2.53221e-07	MB.1	her4.4
ek1	1.50414e-11	0.254392	0.597	0.285	3.08408e-07	MB.1	ek1
arvcfb	1.51833e-11	0.407789	0.698	0.367	3.11318e-07	MB.1	arvcfb
phf21aa1	1.70709e-11	0.433493	0.744	0.455	3.50022e-07	MB.1	phf21aa
efna2b1	1.80251e-11	0.266871	0.217	0.062	3.69587e-07	MB.1	efna2b
si:ch211-269k10.22	1.81178e-11	0.612104	0.659	0.423	3.71488e-07	MB.1	si:ch211-269k10.2
zeb2b2	2.71991e-11	0.409433	0.465	0.208	5.57691e-07	MB.1	zeb2b
mcm51	3.34472e-11	0.568764	0.659	0.403	6.85801e-07	MB.1	mcm5
ago12	3.41204e-11	0.455579	0.705	0.442	6.99604e-07	MB.1	ago1
mex3b2	3.80331e-11	0.429859	0.45	0.214	7.79831e-07	MB.1	mex3b
mn1a2	6.59243e-11	0.407575	0.519	0.26	1.35171e-06	MB.1	mn1a
ephb4a2	7.61556e-11	0.378698	0.915	0.665	1.56149e-06	MB.1	ephb4a
tiam1a1	7.69808e-11	0.543353	0.744	0.494	1.57841e-06	MB.1	tiam1a
mllt102	8.19644e-11	0.393189	0.977	0.884	1.6806e-06	MB.1	mllt10
scube22	1.12175e-10	0.566854	0.667	0.397	2.30004e-06	MB.1	scube2
ildr21	1.52228e-10	0.436004	0.643	0.371	3.12129e-06	MB.1	ildr2
qkib1	2.68845e-10	0.364696	0.496	0.242	5.5124e-06	MB.1	qkib
si:ch211-212k18.52	2.78881e-10	0.472942	0.55	0.303	5.71818e-06	MB.1	si:ch211-212k18.5
fhdc11	3.26575e-10	0.317358	0.465	0.218	6.69609e-06	MB.1	fhdc1
si:ch211-137a8.41	3.31525e-10	0.358319	0.581	0.316	6.7976e-06	MB.1	si:ch211-137a8.4
col27a1b	3.84046e-10	0.431323	0.318	0.131	7.87448e-06	MB.1	col27a1b
dpysl5a	3.89386e-10	0.318698	0.271	0.099	7.98396e-06	MB.1	dpysl5a
tiam2a1	4.05102e-10	0.417155	0.899	0.7	8.30622e-06	MB.1	tiam2a
tnika1	5.20123e-10	0.407137	0.581	0.317	1.06646e-05	MB.1	tnika
lrig12	5.5397e-10	0.428082	0.868	0.639	1.13586e-05	MB.1	lrig1
cacnb3b	6.20025e-10	0.303642	0.217	0.068	1.2713e-05	MB.1	cacnb3b
msi2b	6.84634e-10	0.640474	0.783	0.62	1.40377e-05	MB.1	msi2b
slc9a3r1a	7.08267e-10	0.375617	0.411	0.194	1.45223e-05	MB.1	slc9a3r1a
igf2bp1	8.35597e-10	0.45898	0.969	0.907	1.71331e-05	MB.1	igf2bp1
s1pr22	9.0188e-10	0.44343	0.76	0.501	1.84921e-05	MB.1	s1pr2
emid1	9.92428e-10	0.635099	0.264	0.097	2.03487e-05	MB.1	emid1
tox21	1.13956e-09	0.42024	0.628	0.367	2.33655e-05	MB.1	tox2
sox31	1.23818e-09	0.367508	0.318	0.131	2.53877e-05	MB.1	sox3
lfng2	1.4358e-09	0.340515	0.76	0.474	2.94396e-05	MB.1	lfng
crb2a	1.48155e-09	0.323358	0.318	0.125	3.03776e-05	MB.1	crb2a
ano8b1	1.5798e-09	0.292888	0.364	0.157	3.23921e-05	MB.1	ano8b
rasal22	1.66237e-09	0.368346	0.961	0.765	3.40852e-05	MB.1	rasal2
jarid2b1	2.84901e-09	0.373123	1	0.969	5.84161e-05	MB.1	jarid2b
ush2a	3.0392e-09	0.265129	0.186	0.056	6.23158e-05	MB.1	ush2a
gli2a	3.26073e-09	0.398489	0.969	0.839	6.6858e-05	MB.1	gli2a
her15.11	4.17642e-09	0.573281	0.705	0.451	8.56332e-05	MB.1	her15.1
tcf7l2	5.19245e-09	0.861468	0.659	0.47	0.000106466	MB.1	tcf7l2
igdcc3	5.26938e-09	0.252712	0.302	0.121	0.000108043	MB.1	igdcc3
tcf7l1b	5.8187e-09	0.43266	0.713	0.476	0.000119307	MB.1	tcf7l1b
stox2b1	8.30023e-09	0.376581	0.674	0.413	0.000170188	MB.1	stox2b
nap1l11	9.30338e-09	0.401404	0.837	0.593	0.000190757	MB.1	nap1l1
si:ch211-207i1.2	9.83624e-09	0.42702	0.457	0.245	0.000201682	MB.1	si:ch211-207i1.2
plxnb3	1.09996e-08	0.371934	0.574	0.347	0.000225536	MB.1	plxnb3
robo41	1.24029e-08	0.458065	0.38	0.182	0.000254309	MB.1	robo4
zgc:158689	1.25841e-08	0.325728	0.457	0.237	0.000258025	MB.1	zgc:158689
gphna1	1.30947e-08	0.424502	0.519	0.3	0.000268494	MB.1	gphna
agbl4.1	1.38607e-08	0.546136	0.519	0.293	0.000284199	MB.1	agbl4.1
CABZ01053976.1	1.41147e-08	0.277605	0.357	0.162	0.000289408	MB.1	CABZ01053976.1
adgrg1.11	1.57696e-08	0.275177	0.264	0.104	0.00032334	MB.1	adgrg1.1
acsl22	1.67167e-08	0.383849	0.589	0.355	0.000342759	MB.1	acsl2
efna3b1	1.99825e-08	0.392399	0.729	0.467	0.000409722	MB.1	efna3b
nos1apa.12	2.05883e-08	0.407685	0.907	0.693	0.000422142	MB.1	nos1apa.1
gramd4b	2.47925e-08	0.306567	0.419	0.21	0.000508346	MB.1	gramd4b
fat3a2	2.83065e-08	0.367292	0.899	0.645	0.000580397	MB.1	fat3a
robo11	3.52441e-08	0.406355	0.961	0.891	0.000722645	MB.1	robo1
svild	3.57118e-08	0.430846	0.659	0.431	0.000732235	MB.1	svild
frmd4ba1	3.79756e-08	0.44953	0.806	0.6	0.000778651	MB.1	frmd4ba
rrm12	4.1264e-08	0.401043	0.713	0.464	0.000846077	MB.1	rrm1
arhgef18a2	4.53275e-08	0.315984	0.496	0.271	0.000929395	MB.1	arhgef18a
mpp5a	5.33362e-08	0.351423	0.581	0.345	0.00109361	MB.1	mpp5a
ttyh2	6.11561e-08	0.373022	0.729	0.517	0.00125394	MB.1	ttyh2
ttll7	6.27964e-08	0.275162	0.473	0.248	0.00128758	MB.1	ttll7
pbx4	6.35361e-08	0.371526	0.922	0.825	0.00130274	MB.1	pbx4
amot	6.35665e-08	0.376922	0.674	0.424	0.00130337	MB.1	amot
cxadr1	6.39173e-08	0.350153	0.767	0.551	0.00131056	MB.1	cxadr
cdh21	7.00818e-08	0.306727	0.969	0.822	0.00143696	MB.1	cdh2
mcm41	8.38807e-08	0.417509	0.574	0.359	0.00171989	MB.1	mcm4
ptprna1	9.95584e-08	0.320441	0.287	0.125	0.00204135	MB.1	ptprna
ctnnd2b2	1.25402e-07	0.323432	0.729	0.451	0.00257125	MB.1	ctnnd2b
si:dkey-279j5.1	1.30492e-07	0.276823	0.24	0.097	0.00267561	MB.1	si:dkey-279j5.1
wdpcp	2.08124e-07	0.335389	0.287	0.129	0.00426737	MB.1	wdpcp
rfx21	2.13308e-07	0.367811	0.798	0.57	0.00437366	MB.1	rfx2
sox19a	2.33242e-07	0.276229	0.333	0.16	0.00478239	MB.1	sox19a
myo18aa	2.48784e-07	0.316755	0.171	0.059	0.00510106	MB.1	myo18aa
lig11	3.13552e-07	0.46684	0.791	0.6	0.00642906	MB.1	lig1
pou2f2a.11	3.63675e-07	0.39926	0.581	0.354	0.00745679	MB.1	pou2f2a.1
prex1	4.33247e-07	0.269681	0.566	0.342	0.0088833	MB.1	prex1
orc1	5.57094e-07	0.274773	0.403	0.214	0.0114227	MB.1	orc1
fzd3a2	5.84028e-07	0.367411	0.729	0.496	0.0119749	MB.1	fzd3a
trps11	6.46019e-07	0.346097	0.891	0.725	0.013246	MB.1	trps1
her8a2	6.55051e-07	0.296375	0.395	0.211	0.0134312	MB.1	her8a
atp8a11	6.9342e-07	0.391033	0.69	0.49	0.0142179	MB.1	atp8a1
pola11	7.21282e-07	0.451535	0.744	0.578	0.0147892	MB.1	pola1
her122	8.51703e-07	0.364636	0.465	0.263	0.0174633	MB.1	her12
msh3	8.63393e-07	0.266615	0.357	0.184	0.017703	MB.1	msh3
nck2b1	9.44055e-07	0.388841	0.938	0.818	0.0193569	MB.1	nck2b
cachd11	1.00185e-06	0.365555	0.922	0.831	0.0205419	MB.1	cachd1
cnksr3	1.14629e-06	0.318654	0.729	0.524	0.0235034	MB.1	cnksr3
celsr1a	1.17386e-06	0.280366	0.775	0.54	0.0240689	MB.1	celsr1a
fen1	1.398e-06	0.336314	0.45	0.261	0.0286646	MB.1	fen1
hells1	1.45075e-06	0.36429	0.636	0.43	0.0297462	MB.1	hells
SEMA4F2	1.64914e-06	0.502048	0.566	0.361	0.0338139	MB.1	SEMA4F
kcnk5a2	1.7357e-06	0.286791	0.465	0.27	0.0355888	MB.1	kcnk5a
nat8l2	1.90569e-06	0.332804	0.767	0.595	0.0390743	MB.1	nat8l
2023-03-08	2.35584e-06	0.287072	0.69	0.458	0.0483042	MB.1	2023-03-08
slc12a4	2.38634e-06	0.316774	0.411	0.239	0.0489295	MB.1	slc12a4
fut8a1	2.44456e-06	0.279242	0.628	0.421	0.0501234	MB.1	fut8a
fnbp1a	2.47488e-06	0.251928	0.45	0.251	0.0507449	MB.1	fnbp1a
mylk32	2.86199e-06	0.310831	0.426	0.249	0.0586822	MB.1	mylk3
aspm	2.8831e-06	0.457685	0.612	0.421	0.0591152	MB.1	aspm
ehbp1	3.36274e-06	0.277075	0.752	0.568	0.0689496	MB.1	ehbp1
wasf3b2	3.4118e-06	0.306712	0.729	0.537	0.0699556	MB.1	wasf3b
anapc11	3.49334e-06	0.327176	0.76	0.571	0.0716274	MB.1	anapc1
nkd12	3.70834e-06	0.314222	0.62	0.425	0.0760358	MB.1	nkd1
top2a1	4.48742e-06	0.491329	0.628	0.468	0.0920101	MB.1	top2a
phgdh	4.59716e-06	0.302982	0.442	0.265	0.0942603	MB.1	phgdh
rab11fip31	4.90506e-06	0.293494	0.411	0.241	0.100573	MB.1	rab11fip3
kaznb2	4.91572e-06	0.342453	0.605	0.403	0.100792	MB.1	kaznb
syne1a	4.98859e-06	0.251923	0.264	0.124	0.102286	MB.1	syne1a
nasp1	5.01333e-06	0.342073	0.574	0.376	0.102793	MB.1	nasp
mcm2	5.17613e-06	0.394323	0.597	0.403	0.106131	MB.1	mcm2
arhgap241	5.8555e-06	0.400681	0.465	0.29	0.120061	MB.1	arhgap24
sb:cb811	6.58411e-06	0.261893	0.38	0.211	0.135	MB.1	sb:cb81
cdc25b1	6.7559e-06	0.255823	0.651	0.421	0.138523	MB.1	cdc25b
zeb2a2	6.90692e-06	0.359293	0.837	0.66	0.14162	MB.1	zeb2a
tfdp2	6.94093e-06	0.250556	0.667	0.459	0.142317	MB.1	tfdp2
fmnl2b1	7.03673e-06	0.289286	0.814	0.614	0.144281	MB.1	fmnl2b
nav2b1	7.52163e-06	0.377387	0.651	0.484	0.154223	MB.1	nav2b
col4a61	7.6797e-06	0.25562	0.907	0.708	0.157465	MB.1	col4a6
msh6	7.68269e-06	0.410439	0.519	0.345	0.157526	MB.1	msh6
cables2a	8.00371e-06	0.335286	0.512	0.337	0.164108	MB.1	cables2a
tmem131l	8.56013e-06	0.295506	0.806	0.617	0.175517	MB.1	tmem131l
srgap1a1	8.67857e-06	0.329713	0.829	0.707	0.177945	MB.1	srgap1a
rrm21	9.74773e-06	0.413746	0.504	0.329	0.199867	MB.1	rrm2
birc5a	1.02321e-05	0.262791	0.302	0.159	0.209798	MB.1	birc5a
kif22	1.03468e-05	0.275905	0.558	0.349	0.212151	MB.1	kif22
jam3b	1.06748e-05	0.266266	0.674	0.463	0.218876	MB.1	jam3b
ephb3a	1.07549e-05	0.380369	0.558	0.382	0.220519	MB.1	ephb3a
her21	1.4101e-05	0.28757	0.279	0.139	0.289127	MB.1	her2
sgip1b	1.49011e-05	0.277781	0.302	0.163	0.305532	MB.1	sgip1b
e2f32	1.49627e-05	0.298517	0.837	0.652	0.306796	MB.1	e2f3
lamb2l2	1.5127e-05	0.255544	0.45	0.264	0.310165	MB.1	lamb2l
cdk61	1.56317e-05	0.347839	0.659	0.489	0.320512	MB.1	cdk6
klf8	1.65294e-05	0.268473	0.597	0.41	0.338918	MB.1	klf8
smarcad1b1	1.67315e-05	0.254483	0.349	0.196	0.343063	MB.1	smarcad1b
dnmt1	1.68885e-05	0.252794	0.504	0.315	0.346282	MB.1	dnmt1
ctdspl2b1	1.72397e-05	0.316434	0.535	0.363	0.353484	MB.1	ctdspl2b
plpp3	1.74375e-05	0.304364	0.62	0.441	0.357539	MB.1	plpp3
rbbp4	1.85707e-05	0.303515	0.589	0.411	0.380774	MB.1	rbbp4
kat6a	2.03282e-05	0.280621	0.659	0.489	0.41681	MB.1	kat6a
dnmt3bb.2	2.50403e-05	0.257961	0.628	0.458	0.513426	MB.1	dnmt3bb.2
cdc45	2.56334e-05	0.333021	0.426	0.274	0.525588	MB.1	cdc45
gpm6ba	2.74506e-05	0.302344	0.333	0.188	0.562846	MB.1	gpm6ba
clgn	3.01569e-05	0.266531	0.372	0.222	0.618337	MB.1	clgn
arhgef10la1	3.10451e-05	0.303202	0.519	0.339	0.636548	MB.1	arhgef10la
dctd	3.12943e-05	0.285099	0.364	0.216	0.641659	MB.1	dctd
her4.12	3.74139e-05	0.255353	0.326	0.177	0.767135	MB.1	her4.1
pard3bb	4.03963e-05	0.259232	0.922	0.823	0.828287	MB.1	pard3bb
kif23	4.14715e-05	0.350524	0.45	0.301	0.850331	MB.1	kif23
sox132	4.24964e-05	0.27889	0.744	0.532	0.871346	MB.1	sox13
mcm31	4.2877e-05	0.275556	0.519	0.335	0.879149	MB.1	mcm3
map2k6	4.46771e-05	0.311402	0.76	0.616	0.91606	MB.1	map2k6
pax7a1	4.4993e-05	0.399468	0.209	0.095	0.922537	MB.1	pax7a
espl1	4.55329e-05	0.275185	0.403	0.247	0.933607	MB.1	espl1
dennd5a	4.62824e-05	0.369424	0.628	0.483	0.948974	MB.1	dennd5a
baz1b2	4.91852e-05	0.28271	0.752	0.592	1	MB.1	baz1b
uhrf11	5.35284e-05	0.27927	0.581	0.403	1	MB.1	uhrf1
pax6a1	5.83477e-05	0.630574	0.364	0.228	1	MB.1	pax6a
letm12	5.92329e-05	0.296731	0.659	0.515	1	MB.1	letm1
lrp8	6.01943e-05	0.441722	0.643	0.471	1	MB.1	lrp8
ppp6r3	6.74781e-05	0.272165	0.643	0.483	1	MB.1	ppp6r3
nck2a	7.34855e-05	0.323391	0.69	0.538	1	MB.1	nck2a
znf711	7.98993e-05	0.262241	0.481	0.318	1	MB.1	znf711
chd4b	8.22941e-05	0.311417	0.907	0.843	1	MB.1	chd4b
prim21	8.62987e-05	0.295694	0.736	0.569	1	MB.1	prim2
recql41	8.85534e-05	0.315851	0.326	0.194	1	MB.1	recql4
pcm1	9.06819e-05	0.295775	0.442	0.303	1	MB.1	pcm1
tpx2	9.84867e-05	0.333468	0.574	0.422	1	MB.1	tpx2
ptp4a3b	0.000106106	0.263377	0.636	0.459	1	MB.1	ptp4a3b
cenpf1	0.000118419	0.392561	0.488	0.345	1	MB.1	cenpf
rb11	0.000140395	0.261429	0.597	0.439	1	MB.1	rb1
cemip21	0.000154063	0.287452	0.612	0.462	1	MB.1	cemip2
rpa11	0.000170461	0.293695	0.636	0.486	1	MB.1	rpa1
magi2b	0.00017561	0.321604	0.736	0.634	1	MB.1	magi2b
celf3a1	0.000218642	0.324603	0.504	0.357	1	MB.1	celf3a
pacsin1b	0.000218661	0.276281	0.295	0.172	1	MB.1	pacsin1b
si:ch211-216l23.2	0.000228264	0.258538	0.581	0.451	1	MB.1	si:ch211-216l23.2
pag1	0.000229219	0.309978	0.372	0.234	1	MB.1	pag1
ccnd1	0.000231465	0.278324	0.829	0.695	1	MB.1	ccnd1
ctdp11	0.00025315	0.304892	0.915	0.844	1	MB.1	ctdp1
prdm2b	0.000254197	0.268481	0.388	0.253	1	MB.1	prdm2b
arnt21	0.000262059	0.266485	0.806	0.688	1	MB.1	arnt2
hmox1a	0.000290557	0.273497	0.271	0.157	1	MB.1	hmox1a
brip1	0.000294199	0.327599	0.519	0.364	1	MB.1	brip1
arid1b	0.000329955	0.262232	0.682	0.529	1	MB.1	arid1b
gli31	0.000361546	0.5151	0.891	0.872	1	MB.1	gli3
tusc31	0.000380337	0.254721	0.527	0.381	1	MB.1	tusc3
paxip1	0.000392392	0.333568	0.45	0.322	1	MB.1	paxip1
zgc:1531152	0.000422157	0.266911	0.612	0.461	1	MB.1	zgc:153115
lzts2a	0.000502999	0.276754	0.473	0.333	1	MB.1	lzts2a
chaf1a1	0.000535994	0.267644	0.837	0.678	1	MB.1	chaf1a
dtl1	0.000574127	0.278193	0.535	0.393	1	MB.1	dtl
nnt	0.000599841	0.2821	0.636	0.507	1	MB.1	nnt
ncalda2	0.000726953	0.306114	0.736	0.606	1	MB.1	ncalda
rad181	0.000797716	0.250904	0.597	0.441	1	MB.1	rad18
dgkh	0.000816262	0.267931	0.457	0.323	1	MB.1	dgkh
kpnb31	0.000833877	0.303575	0.713	0.582	1	MB.1	kpnb3
wdhd11	0.000862567	0.354501	0.473	0.35	1	MB.1	wdhd1
plxnb1b	0.000904803	0.251496	0.791	0.701	1	MB.1	plxnb1b
erfl3	0.000930341	0.259928	0.752	0.589	1	MB.1	erfl3
cep1121	0.0009332	0.262222	0.605	0.466	1	MB.1	cep112
ogt.1.1	0.000985147	0.277416	0.767	0.677	1	MB.1	ogt.1.1
jade3	0.00107217	0.256539	0.659	0.525	1	MB.1	jade3
zc3h14	0.00118349	0.268482	0.535	0.404	1	MB.1	zc3h14
zgc:92107	0.00120199	0.279632	0.519	0.388	1	MB.1	zgc:92107
ctnna2	0.00142586	0.277522	0.302	0.192	1	MB.1	ctnna2
arfgef11	0.00146501	0.271914	0.597	0.491	1	MB.1	arfgef1
si:ch211-272n13.3	0.00160936	0.251958	0.481	0.357	1	MB.1	si:ch211-272n13.3
cdc6	0.00169181	0.306387	0.481	0.358	1	MB.1	cdc6
plk11	0.00347922	0.256173	0.465	0.364	1	MB.1	plk1
cabin1	0.00500752	0.26438	0.682	0.603	1	MB.1	cabin1
zmp:00000009361	0.00559901	0.277953	0.295	0.199	1	MB.1	zmp:0000000936
ccne21	0.00969422	0.286697	0.581	0.469	1	MB.1	ccne2
wnt8a.1	7.32224e-75	0.966602	0.535	0.06	1.50135e-70	HB-like	wnt8a.1
pax7b1	2.27483e-54	1.5955	0.763	0.187	4.66432e-50	HB-like	pax7b
cyp26b11	1.17741e-52	2.18498	0.43	0.057	2.41416e-48	HB-like	cyp26b1
greb1l3	2.34029e-51	1.61865	1	0.766	4.79853e-47	HB-like	greb1l
auts2b1	4.07529e-46	1.20168	0.947	0.341	8.35598e-42	HB-like	auts2b
CT990561.11	2.86736e-45	1.08103	0.667	0.162	5.87924e-41	HB-like	CT990561.1
ndst32	8.8521e-42	1.13089	0.842	0.276	1.81503e-37	HB-like	ndst3
bicd1a	1.2118e-40	0.553086	0.254	0.023	2.48468e-36	HB-like	bicd1a
chl1b1	3.79873e-37	1.1608	0.772	0.242	7.78892e-33	HB-like	chl1b
adgrl2a2	8.11752e-36	1.0077	1	0.918	1.66442e-31	HB-like	adgrl2a
kirrel3l1	1.83527e-35	1.61679	0.877	0.477	3.76303e-31	HB-like	kirrel3l
fhod3b	2.43077e-34	1.7023	0.623	0.19	4.98405e-30	HB-like	fhod3b
lamb2l3	1.42008e-33	0.829446	0.772	0.249	2.91172e-29	HB-like	lamb2l
mdkb2	1.50375e-33	0.892028	0.833	0.32	3.0833e-29	HB-like	mdkb
plch13	1.88545e-33	1.0734	0.974	0.598	3.86593e-29	HB-like	plch1
pappab	1.60832e-31	0.800038	0.588	0.155	3.29769e-27	HB-like	pappab
sema5ba3	2.7737e-31	0.955697	0.763	0.272	5.68719e-27	HB-like	sema5ba
si:ch211-152c2.31	3.71738e-31	0.631543	0.658	0.2	7.62212e-27	HB-like	si:ch211-152c2.3
gabrp	6.79918e-31	0.293342	0.184	0.016	1.3941e-26	HB-like	gabrp
lrp2a3	1.00525e-28	1.06989	0.921	0.517	2.06117e-24	HB-like	lrp2a
nova23	1.11363e-28	0.987731	0.991	0.667	2.28339e-24	HB-like	nova2
epha4b2	4.30532e-28	1.12884	0.825	0.374	8.82763e-24	HB-like	epha4b
plxdc22	4.54104e-28	0.965382	0.86	0.407	9.31095e-24	HB-like	plxdc2
cntfr2	1.70238e-26	1.05747	0.982	0.689	3.49055e-22	HB-like	cntfr
otpb	1.89234e-25	0.352927	0.158	0.014	3.88006e-21	HB-like	otpb
scube23	6.45507e-25	0.89802	0.816	0.392	1.32355e-20	HB-like	scube2
pcdh1g32	7.26017e-25	0.555647	0.404	0.097	1.48863e-20	HB-like	pcdh1g32
epha71	1.18619e-24	1.60834	0.877	0.582	2.43216e-20	HB-like	epha7
ncam1a3	1.49688e-24	1.06008	0.956	0.594	3.06921e-20	HB-like	ncam1a
adgrl1a2	1.88149e-24	1.46191	0.482	0.145	3.85781e-20	HB-like	adgrl1a
inpp4ab	5.24028e-24	0.451214	0.377	0.086	1.07447e-19	HB-like	inpp4ab
qkib2	7.68513e-24	0.837526	0.632	0.237	1.57576e-19	HB-like	qkib
cxcl12a1	9.42938e-24	0.872536	0.64	0.225	1.9334e-19	HB-like	cxcl12a
FRMD52	9.6144e-24	0.840515	0.772	0.322	1.97134e-19	HB-like	FRMD5
myh142	3.7452e-23	0.737483	0.667	0.252	7.67915e-19	HB-like	myh14
tfdp21	5.33566e-23	1.06582	0.807	0.453	1.09402e-18	HB-like	tfdp2
rasal23	1.25717e-22	0.82177	0.974	0.765	2.57771e-18	HB-like	rasal2
boc1	1.5106e-22	0.926669	0.93	0.78	3.09733e-18	HB-like	boc
letm13	1.99539e-22	0.902221	0.86	0.506	4.09135e-18	HB-like	letm1
cadm1a3	4.82982e-22	0.924132	0.895	0.54	9.90306e-18	HB-like	cadm1a
si:dkeyp-86c4.11	5.24412e-22	0.644034	0.588	0.22	1.07525e-17	HB-like	si:dkeyp-86c4.1
rgs3b1	7.8254e-22	0.767512	0.702	0.297	1.60452e-17	HB-like	rgs3b
hs3st3b1b3	1.75395e-21	0.977281	0.816	0.405	3.5963e-17	HB-like	hs3st3b1b
ulk1b2	2.14793e-21	0.736481	0.614	0.231	4.40411e-17	HB-like	ulk1b
hs3st3b1a1	2.82515e-21	0.865201	0.509	0.169	5.79269e-17	HB-like	hs3st3b1a
si:dkey-34e4.11	3.36814e-21	0.715812	0.675	0.291	6.90603e-17	HB-like	si:dkey-34e4.1
cdh7a3	5.69672e-21	1.83333	0.596	0.255	1.16806e-16	HB-like	cdh7a
LHFPL61	5.95014e-21	0.646234	0.342	0.083	1.22002e-16	HB-like	LHFPL6
gpr37b	1.27837e-20	0.330243	0.289	0.06	2.62117e-16	HB-like	gpr37b
her4.42	1.34704e-20	0.437695	0.474	0.139	2.76197e-16	HB-like	her4.4
sfrp51	1.68922e-20	0.699366	0.57	0.198	3.46358e-16	HB-like	sfrp5
tshz2	5.778e-20	0.566213	0.263	0.054	1.18472e-15	HB-like	tshz2
her4.23	6.91641e-20	1.00167	0.693	0.295	1.41814e-15	HB-like	her4.2
efnb3b2	8.0367e-20	0.837048	0.939	0.663	1.64785e-15	HB-like	efnb3b
ncam1b2	8.38679e-20	0.685605	0.64	0.256	1.71963e-15	HB-like	ncam1b
cdh22	2.63529e-19	0.681709	0.974	0.822	5.4034e-15	HB-like	cdh2
adgrv12	3.36058e-19	0.683883	0.965	0.594	6.89053e-15	HB-like	adgrv1
kaznb3	7.04457e-19	0.801459	0.772	0.396	1.44442e-14	HB-like	kaznb
plp1a3	7.41326e-19	0.669391	0.623	0.243	1.52001e-14	HB-like	plp1a
robo12	1.22348e-18	0.73338	0.991	0.89	2.50863e-14	HB-like	robo1
bmpr1ba2	2.66287e-18	0.654846	0.956	0.531	5.45994e-14	HB-like	bmpr1ba
trps12	3.94602e-18	0.69319	0.965	0.722	8.09092e-14	HB-like	trps1
nr2f22	5.09084e-18	0.628404	0.693	0.314	1.04383e-13	HB-like	nr2f2
ches11	5.59787e-18	0.812127	0.746	0.434	1.14779e-13	HB-like	ches1
ror12	5.73375e-18	0.806373	0.895	0.556	1.17565e-13	HB-like	ror1
celsr1b3	5.52861e-17	0.713502	0.86	0.502	1.13359e-12	HB-like	celsr1b
her4.13	1.0959e-16	0.586568	0.482	0.17	2.24703e-12	HB-like	her4.1
pcdh192	1.80228e-16	0.756666	0.982	0.778	3.69539e-12	HB-like	pcdh19
gli32	1.86862e-16	0.789234	0.956	0.869	3.83142e-12	HB-like	gli3
cspg5a3	2.02989e-16	0.694535	0.605	0.272	4.16208e-12	HB-like	cspg5a
trim711	2.51271e-16	0.679955	0.939	0.754	5.15207e-12	HB-like	trim71
NAV12	3.71411e-16	0.778968	0.851	0.542	7.6154e-12	HB-like	NAV1
usp54a1	4.1826e-16	0.607502	0.851	0.518	8.576e-12	HB-like	usp54a
BX284638.23	9.16214e-16	0.632116	0.842	0.499	1.87861e-11	HB-like	BX284638.2
chrd	1.07624e-15	0.442826	0.447	0.154	2.20671e-11	HB-like	chrd
mapk113	1.22821e-15	0.454638	0.474	0.176	2.51832e-11	HB-like	mapk11
dag1	2.03825e-15	0.547238	0.982	0.834	4.17922e-11	HB-like	dag1
strbp	3.72555e-15	0.460313	0.535	0.219	7.63888e-11	HB-like	strbp
si:dkey-83f18.15	3.91077e-15	0.278915	0.237	0.054	8.01865e-11	HB-like	si:dkey-83f18.15
PHF21B	8.44328e-15	0.523579	0.675	0.329	1.73121e-10	HB-like	PHF21B
NPAS31	1.10743e-14	0.771832	0.456	0.18	2.27067e-10	HB-like	NPAS3
mapk12b1	1.10832e-14	0.420434	0.386	0.132	2.27249e-10	HB-like	mapk12b
acsl23	1.30322e-14	0.501831	0.702	0.351	2.67213e-10	HB-like	acsl2
pvrl2l3	1.3837e-14	0.736149	0.895	0.564	2.83715e-10	HB-like	pvrl2l
sox133	2.42453e-14	0.663651	0.86	0.528	4.97125e-10	HB-like	sox13
meis2a.1	5.73305e-14	0.444632	0.377	0.13	1.1755e-09	HB-like	meis2a.1
etv42	1.41557e-13	0.601755	0.614	0.289	2.90248e-09	HB-like	etv4
s1pr23	1.76864e-13	0.562251	0.833	0.499	3.62641e-09	HB-like	s1pr2
si:ch211-137a8.42	2.62779e-13	0.470109	0.64	0.315	5.38802e-09	HB-like	si:ch211-137a8.4
ptprfb1	2.86657e-13	0.497284	1	0.957	5.87762e-09	HB-like	ptprfb
ddr11	3.23453e-13	0.509412	0.798	0.458	6.63208e-09	HB-like	ddr1
pax6a2	4.10834e-13	0.319316	0.561	0.219	8.42373e-09	HB-like	pax6a
gli2b2	4.54737e-13	0.506633	0.684	0.353	9.32393e-09	HB-like	gli2b
xylt11	5.12307e-13	0.827981	0.719	0.461	1.05043e-08	HB-like	xylt1
sox11a1	5.50567e-13	0.553193	0.667	0.368	1.12888e-08	HB-like	sox11a
negr13	7.9479e-13	0.515404	0.825	0.473	1.62964e-08	HB-like	negr1
arvcfb1	9.85171e-13	0.571051	0.702	0.369	2.01999e-08	HB-like	arvcfb
tnika2	9.98934e-13	0.481183	0.623	0.317	2.04821e-08	HB-like	tnika
mn1a3	1.144e-12	0.486866	0.553	0.26	2.34566e-08	HB-like	mn1a
meis1b	1.27332e-12	0.43737	0.912	0.574	2.61081e-08	HB-like	meis1b
pax3b2	3.60248e-12	0.483898	0.377	0.141	7.38652e-08	HB-like	pax3b
grin3bb	3.71035e-12	0.342391	0.281	0.086	7.60771e-08	HB-like	grin3bb
arhgef10lb3	4.62405e-12	0.539486	0.5	0.227	9.48116e-08	HB-like	arhgef10lb
SFMBT11	4.91856e-12	0.385966	0.36	0.132	1.0085e-07	HB-like	SFMBT1
efna3b2	5.0032e-12	0.602934	0.781	0.466	1.02586e-07	HB-like	efna3b
nsd22	5.10049e-12	0.540527	0.807	0.555	1.04581e-07	HB-like	nsd2
rfx43	5.57505e-12	0.404903	0.868	0.447	1.14311e-07	HB-like	rfx4
fat3a3	6.83125e-12	0.492324	0.939	0.645	1.40068e-07	HB-like	fat3a
her4.2.13	7.52308e-12	0.609881	0.456	0.19	1.54253e-07	HB-like	her4.2.1
dusp2	7.87603e-12	0.26402	0.167	0.036	1.6149e-07	HB-like	dusp2
pdzd21	1.34564e-11	0.529096	0.693	0.416	2.7591e-07	HB-like	pdzd2
hip11	1.35031e-11	0.633069	0.851	0.638	2.76867e-07	HB-like	hip1
ctnnd2b3	1.61718e-11	0.528055	0.763	0.451	3.31587e-07	HB-like	ctnnd2b
epha3	2.10573e-11	0.489191	0.368	0.138	4.3176e-07	HB-like	epha3
fgfr1b1	2.46789e-11	0.443931	0.93	0.703	5.06016e-07	HB-like	fgfr1b
ank2b3	2.96204e-11	0.616364	0.781	0.515	6.07338e-07	HB-like	ank2b
qki2	4.71689e-11	0.433272	0.553	0.275	9.67151e-07	HB-like	qki2
znf5361	5.79254e-11	0.425659	0.289	0.096	1.1877e-06	HB-like	znf536
zeb2b3	6.65762e-11	0.483078	0.465	0.21	1.36508e-06	HB-like	zeb2b
lzts2a1	8.45371e-11	0.519933	0.614	0.327	1.73335e-06	HB-like	lzts2a
gpm6bb2	9.48823e-11	0.475277	0.561	0.285	1.94547e-06	HB-like	gpm6bb
spry21	1.07906e-10	0.408932	0.447	0.202	2.21251e-06	HB-like	spry2
blmh3	1.27049e-10	0.501666	0.868	0.633	2.60502e-06	HB-like	blmh
dpysl2b	1.44004e-10	0.317279	0.368	0.145	2.95266e-06	HB-like	dpysl2b
fnbp1a1	1.7838e-10	0.302808	0.535	0.248	3.6575e-06	HB-like	fnbp1a
taf4a1	1.83465e-10	0.387148	0.5	0.247	3.76177e-06	HB-like	taf4a
gulp1a1	2.07465e-10	0.524603	0.596	0.325	4.25387e-06	HB-like	gulp1a
lrig13	3.41448e-10	0.465187	0.895	0.639	7.00105e-06	HB-like	lrig1
lfng3	3.62008e-10	0.415067	0.807	0.473	7.42262e-06	HB-like	lfng
entpd1	3.66434e-10	0.284521	0.211	0.061	7.51336e-06	HB-like	entpd1
adcy2a	3.74957e-10	0.257294	0.219	0.065	7.68811e-06	HB-like	adcy2a
fbxw7	3.81844e-10	0.389273	0.974	0.971	7.82934e-06	HB-like	fbxw7
fgfr42	4.40492e-10	0.469495	0.693	0.417	9.03185e-06	HB-like	fgfr4
irx3a1	5.44794e-10	0.266826	0.342	0.129	1.11705e-05	HB-like	irx3a
ANOS1	5.50018e-10	0.404054	0.368	0.151	1.12776e-05	HB-like	ANOS1
tox5	5.8138e-10	0.477527	0.974	0.748	1.19206e-05	HB-like	tox
ssbp41	5.81852e-10	0.561604	0.895	0.761	1.19303e-05	HB-like	ssbp4
st8sia23	5.86349e-10	0.484552	0.579	0.307	1.20225e-05	HB-like	st8sia2
jag2b3	7.66309e-10	0.389415	0.947	0.684	1.57124e-05	HB-like	jag2b
vegfc1	1.17126e-09	0.310232	0.263	0.09	2.40156e-05	HB-like	vegfc
lrp1ab1	1.23034e-09	0.494491	0.93	0.784	2.52269e-05	HB-like	lrp1ab
hapln1a	1.51316e-09	0.267878	0.246	0.079	3.10258e-05	HB-like	hapln1a
msi13	1.51556e-09	0.443375	0.851	0.571	3.10751e-05	HB-like	msi1
cicb1	1.80622e-09	0.542374	0.64	0.402	3.70348e-05	HB-like	cicb
plagl22	2.03961e-09	0.469423	0.93	0.738	4.18202e-05	HB-like	plagl2
trabd2a	2.11084e-09	0.267628	0.333	0.132	4.32806e-05	HB-like	trabd2a
zeb1b3	2.1937e-09	0.494434	0.991	0.77	4.49797e-05	HB-like	zeb1b
nlgn3a	2.32648e-09	0.482181	0.254	0.09	4.77021e-05	HB-like	nlgn3a
BX324164.51	2.95412e-09	0.275178	0.289	0.108	6.05712e-05	HB-like	BX324164.5
jarid2b2	3.06927e-09	0.440387	0.991	0.97	6.29324e-05	HB-like	jarid2b
ccdc102a2	3.20074e-09	0.472762	0.658	0.393	6.56279e-05	HB-like	ccdc102a
col28a2a1	3.2851e-09	0.46781	0.219	0.071	6.73577e-05	HB-like	col28a2a
epb41a3	3.32694e-09	0.453233	0.86	0.549	6.82157e-05	HB-like	epb41a
dtnba1	3.70171e-09	0.554287	0.667	0.445	7.58998e-05	HB-like	dtnba
itga6a2	3.81296e-09	0.344212	0.596	0.316	7.8181e-05	HB-like	itga6a
nhsl1b	4.97466e-09	0.377292	0.939	0.702	0.000102	HB-like	nhsl1b
fam189a12	5.39709e-09	0.716436	0.421	0.199	0.000110662	HB-like	fam189a1
si:ch211-191i18.2	5.46616e-09	0.453383	0.263	0.094	0.000112078	HB-like	si:ch211-191i18.2
dennd2da	6.14843e-09	0.43709	0.491	0.255	0.000126067	HB-like	dennd2da
fmnl31	6.32859e-09	0.550408	0.719	0.487	0.000129761	HB-like	fmnl3
lmo31	6.39529e-09	0.263086	0.465	0.214	0.000131129	HB-like	lmo3
nasp2	8.67428e-09	0.358236	0.667	0.372	0.000177857	HB-like	nasp
nav2a1	9.02653e-09	0.337668	0.754	0.48	0.00018508	HB-like	nav2a
vat1	1.08834e-08	0.290471	0.351	0.149	0.000223153	HB-like	vat1
rrm2.11	1.26202e-08	0.427487	0.877	0.636	0.000258764	HB-like	rrm2.1
fbrsl1	1.35615e-08	0.667611	0.737	0.545	0.000278064	HB-like	fbrsl1
shroom32	1.80766e-08	0.439363	0.632	0.383	0.000370644	HB-like	shroom3
robo31	2.3179e-08	0.427359	0.816	0.601	0.000475262	HB-like	robo3
zeb2a3	2.52895e-08	0.380279	0.939	0.656	0.000518536	HB-like	zeb2a
raraa	2.61994e-08	0.312945	0.518	0.272	0.000537192	HB-like	raraa
pax3a2	2.70229e-08	0.301653	0.675	0.377	0.000554077	HB-like	pax3a
rrm13	3.06846e-08	0.447451	0.719	0.465	0.000629157	HB-like	rrm1
mbd3b1	3.24692e-08	0.343141	0.86	0.623	0.000665748	HB-like	mbd3b
wdhd12	3.69725e-08	0.357333	0.605	0.344	0.000758084	HB-like	wdhd1
serinc53	3.78339e-08	0.408559	0.833	0.614	0.000775747	HB-like	serinc5
fzd3a3	3.90881e-08	0.397884	0.711	0.498	0.000801463	HB-like	fzd3a
srgap31	3.94102e-08	0.339606	0.781	0.551	0.000808067	HB-like	srgap3
nr2f52	4.47103e-08	0.321711	0.842	0.569	0.00091674	HB-like	nr2f5
adam19a	4.61539e-08	0.272258	0.333	0.142	0.000946339	HB-like	adam19a
plekhh12	4.72068e-08	0.422926	0.877	0.658	0.000967928	HB-like	plekhh1
her123	6.24382e-08	0.390572	0.509	0.262	0.00128023	HB-like	her12
notch1b2	7.05648e-08	0.4469	0.781	0.544	0.00144686	HB-like	notch1b
dcbld1	7.25532e-08	0.433579	0.754	0.534	0.00148763	HB-like	dcbld1
eml11	7.2879e-08	0.418322	0.333	0.15	0.00149431	HB-like	eml1
mcm42	7.29789e-08	0.383632	0.614	0.358	0.00149636	HB-like	mcm4
arglu1a	8.42517e-08	0.379513	0.842	0.689	0.0017275	HB-like	arglu1a
swap70b1	8.46384e-08	0.30289	0.254	0.098	0.00173543	HB-like	swap70b
hs6st1a	8.59523e-08	0.268717	0.684	0.413	0.00176237	HB-like	hs6st1a
pbx3b2	8.95468e-08	0.368451	0.439	0.22	0.00183607	HB-like	pbx3b
CR356242.12	9.3359e-08	0.645169	0.342	0.155	0.00191423	HB-like	CR356242.1
celf2	9.95037e-08	0.382198	0.614	0.378	0.00204022	HB-like	celf2
bmpr1bb	1.19056e-07	0.279403	0.351	0.161	0.00244113	HB-like	bmpr1bb
ildr22	1.37878e-07	0.289016	0.649	0.372	0.00282706	HB-like	ildr2
cyfip21	2.09373e-07	0.265681	0.518	0.278	0.00429298	HB-like	cyfip2
si:ch211-216b21.21	2.5e-07	0.496282	0.228	0.086	0.00512601	HB-like	si:ch211-216b21.2
jam3b1	2.5178e-07	0.289293	0.728	0.462	0.0051625	HB-like	jam3b
sox19a1	2.51914e-07	0.302174	0.342	0.161	0.00516525	HB-like	sox19a
dbn13	2.80805e-07	0.320327	0.754	0.512	0.00575762	HB-like	dbn1
etv5b	2.95486e-07	0.292693	0.588	0.343	0.00605865	HB-like	etv5b
adamts31	2.99758e-07	0.360478	0.465	0.251	0.00614625	HB-like	adamts3
hmgb1b	3.07204e-07	0.288022	0.526	0.298	0.0062989	HB-like	hmgb1b
rnf442	3.10762e-07	0.411497	0.886	0.691	0.00637186	HB-like	rnf44
znf609b	3.53813e-07	0.34331	0.982	0.902	0.00725458	HB-like	znf609b
notch31	3.61873e-07	0.336533	0.877	0.687	0.00741985	HB-like	notch3
add3a	3.64964e-07	0.489178	0.746	0.557	0.00748321	HB-like	add3a
cobl1	3.73924e-07	0.330897	0.412	0.212	0.00766695	HB-like	cobl
tusc32	3.921e-07	0.386541	0.605	0.378	0.00803962	HB-like	tusc3
pola12	4.09926e-07	0.54257	0.754	0.579	0.00840513	HB-like	pola1
mcm10	4.65206e-07	0.334248	0.518	0.291	0.00953858	HB-like	mcm10
ankrd112	4.87945e-07	0.446092	0.939	0.903	0.0100048	HB-like	ankrd11
prkd21	5.12947e-07	0.318576	0.482	0.266	0.0105175	HB-like	prkd2
si:ch211-269k10.23	5.57294e-07	0.4221	0.667	0.424	0.0114268	HB-like	si:ch211-269k10.2
sulf2b2	7.92335e-07	0.304643	0.237	0.095	0.016246	HB-like	sulf2b
cd82a	7.98558e-07	0.259584	0.386	0.195	0.0163736	HB-like	cd82a
kmt5ab	9.47925e-07	0.257226	0.368	0.18	0.0194363	HB-like	kmt5ab
cgnl11	1.11174e-06	0.330047	0.675	0.441	0.0227952	HB-like	cgnl1
lhfpl2b1	1.17658e-06	0.298121	0.43	0.234	0.0241245	HB-like	lhfpl2b
srgap21	1.44086e-06	0.32151	0.947	0.884	0.0295434	HB-like	srgap2
kpnb32	1.65032e-06	0.385702	0.807	0.579	0.0338381	HB-like	kpnb3
rtca	1.86775e-06	0.280145	0.632	0.392	0.0382964	HB-like	rtca
orc61	1.87023e-06	0.333603	0.421	0.227	0.0383471	HB-like	orc6
dock4b1	1.87406e-06	0.371008	0.649	0.448	0.0384258	HB-like	dock4b
robo42	2.03003e-06	0.354696	0.368	0.184	0.0416238	HB-like	robo4
her15.12	2.20676e-06	0.42401	0.702	0.453	0.0452473	HB-like	her15.1
phf21aa2	2.29832e-06	0.321251	0.728	0.457	0.0471248	HB-like	phf21aa
mn1b	2.29837e-06	0.259789	0.342	0.17	0.0471257	HB-like	mn1b
ints81	2.33005e-06	0.381201	0.956	0.897	0.0477753	HB-like	ints8
adcyap1r1a	2.46192e-06	0.312428	0.184	0.068	0.0504792	HB-like	adcyap1r1a
greb13	2.53122e-06	0.363172	0.842	0.638	0.0519001	HB-like	greb1
tox22	2.55412e-06	0.300053	0.596	0.37	0.0523696	HB-like	tox2
tmcc3	2.57304e-06	0.338654	0.588	0.391	0.0527577	HB-like	tmcc3
spred2a1	2.98977e-06	0.288826	0.658	0.453	0.0613023	HB-like	spred2a
micall2b	3.62643e-06	0.311431	0.342	0.179	0.0743563	HB-like	micall2b
baz2ba1	4.647e-06	0.254781	0.974	0.878	0.0952822	HB-like	baz2ba
lmnb2	5.47225e-06	0.371437	0.816	0.642	0.112203	HB-like	lmnb2
mat2aa	6.58227e-06	0.307941	0.807	0.572	0.134963	HB-like	mat2aa
ptmab	6.74002e-06	0.300121	0.947	0.831	0.138197	HB-like	ptmab
trhde.2.1	6.89812e-06	0.280007	0.254	0.118	0.141439	HB-like	trhde.2.1
znf318	7.11286e-06	0.335366	0.632	0.453	0.145842	HB-like	znf318
mibp	7.11316e-06	0.331254	0.535	0.341	0.145848	HB-like	mibp
slbp	7.59429e-06	0.277574	0.623	0.392	0.155713	HB-like	slbp
epn3a	7.88093e-06	0.37041	0.596	0.397	0.161591	HB-like	epn3a
exoc6b	8.9335e-06	0.427646	0.658	0.486	0.183172	HB-like	exoc6b
nsd1b	1.09681e-05	0.328403	0.263	0.126	0.22489	HB-like	nsd1b
b4galnt4a1	1.16236e-05	0.277601	0.281	0.136	0.238331	HB-like	b4galnt4a
psd3l	1.29334e-05	0.338801	0.789	0.601	0.265187	HB-like	psd3l
igdcc41	1.35533e-05	0.318837	0.693	0.489	0.277897	HB-like	igdcc4
igf1ra	1.41918e-05	0.253752	0.93	0.792	0.290988	HB-like	igf1ra
clic41	1.49111e-05	0.262824	0.702	0.498	0.305737	HB-like	clic4
pole1	1.96912e-05	0.388067	0.596	0.408	0.403748	HB-like	pole
plekha7b3	1.99257e-05	0.270757	0.57	0.372	0.408557	HB-like	plekha7b
hpca1	2.01041e-05	0.440252	0.421	0.262	0.412214	HB-like	hpca
necab2	2.10641e-05	0.320654	0.395	0.227	0.431899	HB-like	necab2
phactr4b	2.1746e-05	0.258146	0.737	0.541	0.445879	HB-like	phactr4b
ZNF4231	2.37973e-05	0.291496	0.825	0.635	0.487939	HB-like	ZNF423
ece2b	2.61698e-05	0.385966	0.482	0.307	0.536585	HB-like	ece2b
ezh2	2.99083e-05	0.293486	0.719	0.515	0.61324	HB-like	ezh2
efnb1	3.08146e-05	0.331242	0.719	0.528	0.631823	HB-like	efnb1
uacab1	3.27232e-05	0.280033	0.456	0.269	0.670957	HB-like	uacab
cyp26c11	3.95341e-05	0.25779	0.193	0.082	0.810608	HB-like	cyp26c1
ercc6l	4.24291e-05	0.25773	0.325	0.178	0.869967	HB-like	ercc6l
mxd31	4.53995e-05	0.288074	0.509	0.318	0.930871	HB-like	mxd3
si:ch73-386h18.12	4.68978e-05	0.261749	0.667	0.448	0.961593	HB-like	si:ch73-386h18.1
tmsb4x	4.81265e-05	0.263215	0.781	0.602	0.986785	HB-like	tmsb4x
sfpq	5.38413e-05	0.298571	0.956	0.955	1	HB-like	sfpq
ctnnbip1	5.52653e-05	0.314294	0.561	0.392	1	HB-like	ctnnbip1
acvr2bb2	6.45572e-05	0.307934	0.649	0.469	1	HB-like	acvr2bb
lrp51	7.42367e-05	0.262838	0.851	0.743	1	HB-like	lrp5
si:dkeyp-68b7.51	7.46632e-05	0.285397	0.509	0.329	1	HB-like	si:dkeyp-68b7.5
mpp6a	7.49834e-05	0.344643	0.658	0.468	1	HB-like	mpp6a
rimkla	8.19705e-05	0.266733	0.596	0.421	1	HB-like	rimkla
ncalda3	8.69159e-05	0.37658	0.754	0.606	1	HB-like	ncalda
lig12	9.30614e-05	0.387838	0.781	0.602	1	HB-like	lig1
ssrp1a	9.91243e-05	0.290245	0.781	0.622	1	HB-like	ssrp1a
dnmt3bb.3	9.9698e-05	0.271977	0.465	0.301	1	HB-like	dnmt3bb.3
arhgef7a1	0.000101547	0.346323	0.5	0.332	1	HB-like	arhgef7a
xk	0.000103586	0.259285	0.211	0.1	1	HB-like	xk
rbbp41	0.000110841	0.286148	0.588	0.412	1	HB-like	rbbp4
setdb1a	0.000115641	0.278309	0.561	0.395	1	HB-like	setdb1a
CABZ01031870.1	0.0001222	0.250656	0.307	0.169	1	HB-like	CABZ01031870.1
kif20a	0.000134219	0.340466	0.623	0.435	1	HB-like	kif20a
vrk1	0.000154579	0.279841	0.5	0.335	1	HB-like	vrk1
scmh11	0.000184065	0.259018	0.351	0.207	1	HB-like	scmh1
cbx3a	0.000194788	0.271639	0.57	0.403	1	HB-like	cbx3a
plxnb1b1	0.000204722	0.308432	0.825	0.7	1	HB-like	plxnb1b
slc23a2	0.000210655	0.270203	0.456	0.303	1	HB-like	slc23a2
pcna	0.000226307	0.262476	0.658	0.477	1	HB-like	pcna
carm11	0.00023103	0.28173	0.754	0.624	1	HB-like	carm1
alcamb	0.000281635	0.299333	0.842	0.677	1	HB-like	alcamb
si:ch1073-186i23.11	0.000292243	0.26385	0.43	0.283	1	HB-like	si:ch1073-186i23.1
epb41l5	0.000296331	0.294508	0.482	0.333	1	HB-like	epb41l5
lrch4	0.000307649	0.277501	0.675	0.517	1	HB-like	lrch4
pds5b	0.000308263	0.266472	0.754	0.579	1	HB-like	pds5b
tspan17	0.00032109	0.318064	0.57	0.414	1	HB-like	tspan17
seta	0.000321939	0.272473	0.632	0.476	1	HB-like	seta
prpf6	0.000362192	0.25485	0.632	0.452	1	HB-like	prpf6
daxx	0.000366488	0.28278	0.43	0.279	1	HB-like	daxx
top2a2	0.000428041	0.321245	0.64	0.469	1	HB-like	top2a
kif20bb	0.000509877	0.2527	0.456	0.307	1	HB-like	kif20bb
unkl	0.000565256	0.285628	0.57	0.427	1	HB-like	unkl
arhgap33	0.000606546	0.252359	0.614	0.451	1	HB-like	arhgap33
prim22	0.000711798	0.288858	0.746	0.57	1	HB-like	prim2
mcm52	0.000745918	0.307538	0.535	0.411	1	HB-like	mcm5
chn11	0.000822734	0.262905	0.596	0.453	1	HB-like	chn1
rab11fip32	0.000825662	0.253169	0.368	0.244	1	HB-like	rab11fip3
rpa12	0.000863119	0.290129	0.649	0.487	1	HB-like	rpa1
smc2	0.000901447	0.254823	0.447	0.312	1	HB-like	smc2
1981-03-01	0.00106069	0.263347	0.605	0.463	1	HB-like	2023-03-08
brip11	0.00109514	0.277487	0.5	0.366	1	HB-like	brip1
si:dkey-35m8.1	0.00126209	0.255596	0.272	0.157	1	HB-like	si:dkey-35m8.1
adck1	0.00128988	0.256845	0.439	0.306	1	HB-like	adck1
snx29	0.00131195	0.252362	0.605	0.455	1	HB-like	snx29
igf2bp3	0.00131811	0.269335	0.93	0.862	1	HB-like	igf2bp3
kansl1a	0.00133022	0.252984	0.754	0.631	1	HB-like	kansl1a
arhgef10la2	0.00153694	0.277477	0.5	0.341	1	HB-like	arhgef10la
si:dkey-49n23.11	0.00161179	0.322852	0.368	0.238	1	HB-like	si:dkey-49n23.1
phgdh1	0.00174301	0.307131	0.395	0.269	1	HB-like	phgdh
CR388132.2	0.00180609	0.277578	0.465	0.339	1	HB-like	CR388132.2
fbxo51	0.00182727	0.31186	0.588	0.468	1	HB-like	fbxo5
nap1l12	0.00215996	0.265815	0.719	0.601	1	HB-like	nap1l1
efna2a2	0.00217737	0.318121	0.693	0.581	1	HB-like	efna2a
tnrc6a	0.00315751	0.28327	0.728	0.599	1	HB-like	tnrc6a
chaf1a2	0.004448	0.265345	0.789	0.682	1	HB-like	chaf1a
pax7a2	4.74276e-170	2.4396	0.877	0.066	9.72456e-166	MHB.2	pax7a
en2b1	1.2672e-169	2.04952	0.925	0.075	2.59828e-165	MHB.2	en2b
pdzrn4	2.05482e-131	1.08987	0.443	0.014	4.21321e-127	MHB.2	pdzrn4
cxcl14	6.13251e-112	0.627237	0.292	0.004	1.25741e-107	MHB.2	cxcl14
nyap2b	1.07537e-104	0.741263	0.491	0.028	2.20494e-100	MHB.2	nyap2b
ackr3a	4.76407e-82	0.49131	0.302	0.011	9.76824e-78	MHB.2	ackr3a
pax51	5.85523e-77	2.25823	0.745	0.12	1.20056e-72	MHB.2	pax5
pdgfbb1	1.09405e-71	1.0177	0.623	0.081	2.24323e-67	MHB.2	pdgfbb
mab21l21	2.48328e-63	0.825256	0.528	0.065	5.09172e-59	MHB.2	mab21l2
wnt1	3.29772e-62	0.943042	0.434	0.043	6.76165e-58	MHB.2	wnt1
en2a1	1.40053e-57	0.597745	0.368	0.032	2.87164e-53	MHB.2	en2a
her111	1.81623e-57	0.78735	0.425	0.045	3.724e-53	MHB.2	her11
pax2a1	3.21003e-56	2.09804	0.83	0.209	6.58185e-52	MHB.2	pax2a
rbm33b	5.49526e-55	0.573226	0.292	0.02	1.12675e-50	MHB.2	rbm33b
gria3b1	1.51465e-53	1.00792	0.5	0.07	3.10564e-49	MHB.2	gria3b
prom1b	1.12037e-49	0.537233	0.34	0.033	2.29721e-45	MHB.2	prom1b
her5	3.00054e-48	0.410594	0.255	0.017	6.15231e-44	MHB.2	her5
sema3aa1	1.80674e-47	1.13545	0.717	0.179	3.70453e-43	MHB.2	sema3aa
wnt8b	1.39352e-43	1.08089	0.585	0.121	2.85728e-39	MHB.2	wnt8b
meis1b1	2.80958e-42	1.52488	0.991	0.571	5.76076e-38	MHB.2	meis1b
hs3st3b1b4	2.14582e-41	1.38092	0.925	0.401	4.39979e-37	MHB.2	hs3st3b1b
ptprnb2	2.5655e-41	1.26639	0.896	0.306	5.26031e-37	MHB.2	ptprnb
zfhx42	2.2305e-40	1.32984	0.981	0.655	4.57341e-36	MHB.2	zfhx4
tenm42	3.54725e-37	1.35682	1	0.706	7.27327e-33	MHB.2	tenm4
efna2a3	2.45924e-36	1.39088	0.953	0.569	5.04243e-32	MHB.2	efna2a
gas7a2	4.98217e-36	0.971375	0.755	0.231	1.02154e-31	MHB.2	gas7a
arhgap21a2	1.80653e-35	0.97786	0.868	0.338	3.70412e-31	MHB.2	arhgap21a
gfap2	2.91681e-35	0.67168	0.547	0.125	5.98064e-31	MHB.2	gfap
pax2b1	9.37849e-34	1.32299	0.557	0.139	1.92297e-29	MHB.2	pax2b
kif21b1	1.59617e-33	0.923795	0.67	0.195	3.27279e-29	MHB.2	kif21b
si:dkey-6b12.5	1.87697e-33	0.558375	0.33	0.049	3.84853e-29	MHB.2	si:dkey-6b12.5
cachd12	2.77432e-31	1.08186	1	0.828	5.68847e-27	MHB.2	cachd1
foxp42	3.28932e-31	1.09388	0.991	0.808	6.74442e-27	MHB.2	foxp4
emilin1a	3.3676e-31	0.409869	0.292	0.04	6.90492e-27	MHB.2	emilin1a
znrf32	6.56627e-31	1.15548	0.991	0.858	1.34635e-26	MHB.2	znrf3
CABZ01041610.11	8.27559e-31	0.613287	0.283	0.038	1.69683e-26	MHB.2	CABZ01041610.1
msi2b1	6.49411e-30	1.27836	0.925	0.615	1.33155e-25	MHB.2	msi2b
negr14	3.42145e-29	1.25696	0.915	0.47	7.01533e-25	MHB.2	negr1
alpl	8.27871e-29	0.588753	0.377	0.073	1.69747e-24	MHB.2	alpl
nkd13	9.76019e-29	1.13248	0.84	0.417	2.00123e-24	MHB.2	nkd1
ndst2b1	1.21811e-28	1.25089	0.736	0.3	2.49762e-24	MHB.2	ndst2b
tiam2a2	2.44667e-28	0.947478	0.962	0.699	5.01666e-24	MHB.2	tiam2a
pax3a3	1.49674e-27	0.812923	0.915	0.367	3.06892e-23	MHB.2	pax3a
cacnb3b1	1.66323e-27	0.548802	0.349	0.063	3.41028e-23	MHB.2	cacnb3b
ephb4b2	3.88225e-27	0.691648	0.764	0.284	7.96016e-23	MHB.2	ephb4b
tle3b1	1.81172e-26	0.856618	0.906	0.444	3.71474e-22	MHB.2	tle3b
tox23	2.11155e-26	0.892381	0.811	0.361	4.32951e-22	MHB.2	tox2
lmx1bb1	2.28564e-26	1.32379	0.698	0.244	4.68648e-22	MHB.2	lmx1bb
ncam1a4	2.73575e-26	1.0345	0.991	0.594	5.60939e-22	MHB.2	ncam1a
mdka2	7.55348e-26	0.859972	0.821	0.356	1.54877e-21	MHB.2	mdka
pou2f2a.12	1.06914e-25	0.918125	0.802	0.346	2.19216e-21	MHB.2	pou2f2a.1
nrxn3a1	1.25133e-25	0.696433	0.462	0.115	2.56573e-21	MHB.2	nrxn3a
si:ch211-286o17.13	7.09249e-25	0.975129	0.774	0.315	1.45424e-20	MHB.2	si:ch211-286o17.1
si:ch211-117c9.1	8.03822e-25	0.306149	0.179	0.019	1.64816e-20	MHB.2	si:ch211-117c9.1
amot1	9.39198e-25	0.930294	0.849	0.418	1.92573e-20	MHB.2	amot
cplx2	1.6674e-24	0.653713	0.387	0.088	3.41884e-20	MHB.2	cplx2
jag2b4	3.58091e-24	0.912787	1	0.682	7.3423e-20	MHB.2	jag2b
fgf22	4.92259e-24	0.311879	0.123	0.008	1.00933e-19	MHB.2	fgf22
SAMD51	8.12256e-24	0.717318	0.491	0.14	1.66545e-19	MHB.2	SAMD5
gdf111	1.049e-23	0.861761	0.651	0.24	2.15087e-19	MHB.2	gdf11
chl1a1	1.07013e-23	0.719302	0.538	0.156	2.1942e-19	MHB.2	chl1a
sox21a	6.73495e-23	0.385508	0.255	0.041	1.38093e-18	MHB.2	sox21a
zbtb16a4	8.342e-23	0.839435	1	0.895	1.71044e-18	MHB.2	zbtb16a
wnt31	9.3593e-23	1.04468	0.613	0.223	1.91903e-18	MHB.2	wnt3
s1pr24	1.02369e-22	0.814533	0.906	0.497	2.09897e-18	MHB.2	s1pr2
gli2a1	1.31066e-22	0.743181	1	0.839	2.68739e-18	MHB.2	gli2a
il17rd1	1.46711e-22	0.963741	0.783	0.369	3.00816e-18	MHB.2	il17rd
pou3f2b1	1.96921e-22	0.402629	0.368	0.084	4.03767e-18	MHB.2	pou3f2b
efna3b3	3.96148e-22	0.964855	0.868	0.464	8.12262e-18	MHB.2	efna3b
efcc11	4.34929e-22	0.455367	0.264	0.046	8.91778e-18	MHB.2	efcc1
adgrl3.12	5.11227e-22	0.935716	0.66	0.274	1.04822e-17	MHB.2	adgrl3.1
efna5a1	7.35628e-22	0.908664	0.953	0.678	1.50833e-17	MHB.2	efna5a
otx11	6.79073e-21	0.547442	0.425	0.116	1.39237e-16	MHB.2	otx1
foxp1b1	1.00871e-20	0.846415	0.915	0.585	2.06826e-16	MHB.2	foxp1b
lrp81	2.79335e-20	1.20903	0.83	0.464	5.72748e-16	MHB.2	lrp8
tmem471	6.91375e-20	0.474048	0.425	0.12	1.41759e-15	MHB.2	tmem47
ptprn23	1.61154e-19	0.73529	0.887	0.447	3.3043e-15	MHB.2	ptprn2
si:dkey-1h24.2	1.76453e-19	0.349985	0.189	0.027	3.618e-15	MHB.2	si:dkey-1h24.2
serinc4	2.79521e-19	0.327676	0.217	0.036	5.7313e-15	MHB.2	serinc4
tet33	4.43641e-19	0.738969	0.953	0.555	9.09641e-15	MHB.2	tet3
trim2b1	5.08261e-19	0.284885	0.255	0.048	1.04214e-14	MHB.2	trim2b
her32	5.28737e-19	0.553833	0.283	0.06	1.08412e-14	MHB.2	her3
efna2b2	8.65597e-19	0.400814	0.283	0.06	1.77482e-14	MHB.2	efna2b
crb11	1.19454e-18	0.456577	0.443	0.132	2.44929e-14	MHB.2	crb1
pou3f3a1	1.59918e-18	0.296317	0.274	0.056	3.27895e-14	MHB.2	pou3f3a
dmbx1a1	2.49876e-18	0.38974	0.292	0.064	5.12345e-14	MHB.2	dmbx1a
ldb2a	2.97026e-18	0.584843	0.538	0.196	6.09023e-14	MHB.2	ldb2a
inhbb	5.57558e-18	0.362097	0.34	0.085	1.14322e-13	MHB.2	inhbb
her8a3	5.72635e-18	0.594074	0.557	0.205	1.17413e-13	MHB.2	her8a
nova24	6.17931e-18	0.719336	0.991	0.668	1.26701e-13	MHB.2	nova2
mbd3b2	1.17075e-17	0.780313	0.906	0.621	2.40051e-13	MHB.2	mbd3b
SIPA11	1.29706e-17	0.519512	0.425	0.13	2.65949e-13	MHB.2	SIPA1
ephb4a3	2.27283e-17	0.697294	0.943	0.666	4.6602e-13	MHB.2	ephb4a
ppargc1b	2.67525e-17	0.48819	0.434	0.136	5.48533e-13	MHB.2	ppargc1b
rfx44	4.71829e-17	0.616325	0.915	0.447	9.67438e-13	MHB.2	rfx4
wnt3a	5.71837e-17	0.453385	0.283	0.065	1.1725e-12	MHB.2	wnt3a
plxna1a1	7.78343e-17	0.677869	0.887	0.574	1.59591e-12	MHB.2	plxna1a
plch14	9.5584e-17	0.767926	0.953	0.6	1.95985e-12	MHB.2	plch1
lef11	9.77756e-17	0.465037	0.774	0.327	2.00479e-12	MHB.2	lef1
ror13	1.10519e-16	0.749308	0.925	0.555	2.26608e-12	MHB.2	ror1
fgf18b	1.98365e-16	0.428787	0.377	0.11	4.06727e-12	MHB.2	fgf18b
dvl3b	3.91188e-16	0.562029	0.557	0.223	8.02091e-12	MHB.2	dvl3b
zgc:1098891	4.89344e-16	0.492926	0.5	0.186	1.00335e-11	MHB.2	zgc:109889
igdcc31	5.32772e-16	0.483568	0.387	0.119	1.0924e-11	MHB.2	igdcc3
met	8.08418e-16	0.370521	0.434	0.135	1.65758e-11	MHB.2	met
tenm31	8.71017e-16	0.655749	0.925	0.652	1.78593e-11	MHB.2	tenm3
pou3f3b2	1.05022e-15	0.364261	0.387	0.117	2.15338e-11	MHB.2	pou3f3b
otx2b1	1.08022e-15	0.315125	0.274	0.064	2.21489e-11	MHB.2	otx2b
flrt31	1.44332e-15	0.573231	0.594	0.249	2.95939e-11	MHB.2	flrt3
gabbr1a	1.68345e-15	0.403398	0.245	0.055	3.45174e-11	MHB.2	gabbr1a
col4a62	2.28473e-15	0.755746	0.934	0.709	4.6846e-11	MHB.2	col4a6
zeb1b4	2.60717e-15	0.665248	0.991	0.771	5.34574e-11	MHB.2	zeb1b
si:ch73-386h18.13	6.36354e-15	0.722457	0.745	0.445	1.30478e-10	MHB.2	si:ch73-386h18.1
axin21	1.18205e-14	0.687051	0.745	0.413	2.42368e-10	MHB.2	axin2
sb:cb812	2.03881e-14	0.481139	0.509	0.207	4.18038e-10	MHB.2	sb:cb81
nav2b2	3.15299e-14	0.638797	0.802	0.479	6.46489e-10	MHB.2	nav2b
vwa73	4.14077e-14	0.480317	0.34	0.104	8.49024e-10	MHB.2	vwa7
raly	5.15176e-14	0.551127	0.236	0.056	1.05632e-09	MHB.2	raly
kif5c	6.17802e-14	0.256111	0.179	0.034	1.26674e-09	MHB.2	kif5c
st8sia24	7.07746e-14	0.409345	0.698	0.303	1.45116e-09	MHB.2	st8sia2
polrmt	1.14647e-13	0.656234	0.632	0.328	2.35072e-09	MHB.2	polrmt
srgap32	1.19412e-13	0.809515	0.811	0.551	2.44841e-09	MHB.2	srgap3
wnt7ba	1.62465e-13	0.452258	0.34	0.108	3.33118e-09	MHB.2	wnt7ba
nat8l3	1.76467e-13	0.615363	0.858	0.593	3.61828e-09	MHB.2	nat8l
map7d1a3	1.80753e-13	0.591008	0.887	0.585	3.70617e-09	MHB.2	map7d1a
agrn1	2.99575e-13	0.58117	0.972	0.917	6.14248e-09	MHB.2	agrn
ttyh2l	4.06745e-13	0.302117	0.226	0.054	8.3399e-09	MHB.2	ttyh2l
si:ch211-216b21.22	5.34082e-13	0.377383	0.292	0.083	1.09508e-08	MHB.2	si:ch211-216b21.2
rbfox3a1	1.0543e-12	0.522819	0.547	0.253	2.16174e-08	MHB.2	rbfox3a
tmem108	1.23385e-12	0.541174	0.736	0.387	2.52989e-08	MHB.2	tmem108
pax3b3	1.62022e-12	0.43444	0.396	0.141	3.3221e-08	MHB.2	pax3b
skia3	1.6475e-12	0.615033	0.906	0.646	3.37804e-08	MHB.2	skia
msi14	1.75033e-12	0.525673	0.934	0.568	3.58889e-08	MHB.2	msi1
cspg5a4	1.88946e-12	0.489514	0.594	0.274	3.87415e-08	MHB.2	cspg5a
sh2d3ca2	2.64826e-12	0.427272	0.481	0.199	5.42999e-08	MHB.2	sh2d3ca
rgcc	3.52155e-12	0.363776	0.283	0.085	7.22058e-08	MHB.2	rgcc
kpnb33	3.58243e-12	0.513021	0.868	0.577	7.34541e-08	MHB.2	kpnb3
pde4bb	4.19233e-12	0.456577	0.453	0.194	8.59596e-08	MHB.2	pde4bb
zfpm2a	4.73196e-12	0.346125	0.255	0.072	9.70241e-08	MHB.2	zfpm2a
qkib3	5.68198e-12	0.452518	0.547	0.242	1.16503e-07	MHB.2	qkib
acss1	5.89683e-12	0.380123	0.472	0.195	1.20909e-07	MHB.2	acss1
otx2a1	6.53134e-12	0.30733	0.377	0.13	1.33919e-07	MHB.2	otx2a
fam110b	7.06267e-12	0.331251	0.245	0.067	1.44813e-07	MHB.2	fam110b
grm2b	7.41361e-12	0.416491	0.302	0.097	1.52009e-07	MHB.2	grm2b
wls	8.0492e-12	0.587496	0.698	0.384	1.65041e-07	MHB.2	wls
map21	8.2256e-12	0.354965	0.453	0.178	1.68658e-07	MHB.2	map2
tmtc2a	1.02563e-11	0.27509	0.245	0.067	2.10296e-07	MHB.2	tmtc2a
aff23	1.69107e-11	0.59839	0.764	0.45	3.46737e-07	MHB.2	aff2
srgap1a2	2.2708e-11	0.507479	0.943	0.703	4.65605e-07	MHB.2	srgap1a
dhx32b1	2.8724e-11	0.296719	0.377	0.137	5.88957e-07	MHB.2	dhx32b
hk2	2.95008e-11	0.496587	0.538	0.265	6.04884e-07	MHB.2	hk2
si:dkeyp-120h9.12	4.55042e-11	0.418925	0.585	0.287	9.33018e-07	MHB.2	si:dkeyp-120h9.1
ipo71	4.81901e-11	0.465229	1	0.918	9.88089e-07	MHB.2	ipo7
ptpn13	5.3372e-11	0.500376	0.896	0.655	1.09434e-06	MHB.2	ptpn13
meis2a.11	7.12915e-11	0.461437	0.349	0.132	1.46176e-06	MHB.2	meis2a.1
emid11	1.07954e-10	0.318031	0.302	0.097	2.21349e-06	MHB.2	emid1
pms2	1.42812e-10	0.345018	0.292	0.099	2.92823e-06	MHB.2	pms2
BX284638.24	1.59659e-10	0.409075	0.858	0.499	3.27366e-06	MHB.2	BX284638.2
arhgef10lb4	1.61196e-10	0.374519	0.509	0.228	3.30517e-06	MHB.2	arhgef10lb
dock111	2.18034e-10	0.378443	0.415	0.176	4.47057e-06	MHB.2	dock11
igsf9a	2.20744e-10	0.504634	0.66	0.357	4.52613e-06	MHB.2	igsf9a
eif4h	2.24323e-10	0.459197	0.84	0.58	4.59951e-06	MHB.2	eif4h
lrig14	2.63228e-10	0.438753	0.906	0.639	5.39722e-06	MHB.2	lrig1
auts2a1	2.67876e-10	0.546913	0.792	0.578	5.49254e-06	MHB.2	auts2a
ldlrap1a	2.69673e-10	0.302815	0.321	0.114	5.52938e-06	MHB.2	ldlrap1a
igf2bp2a	3.16349e-10	0.422602	0.368	0.148	6.48643e-06	MHB.2	igf2bp2a
ptprna2	4.0754e-10	0.305111	0.34	0.124	8.35621e-06	MHB.2	ptprna
mapk12	4.80608e-10	0.438296	0.698	0.415	9.85439e-06	MHB.2	mapk1
zbtb16b2	4.91839e-10	0.4642	0.943	0.631	1.00847e-05	MHB.2	zbtb16b
rpia	5.56624e-10	0.350055	0.5	0.233	1.1413e-05	MHB.2	rpia
stmn4	5.88724e-10	0.387184	0.415	0.182	1.20712e-05	MHB.2	stmn4
tshz11	6.46958e-10	0.474886	0.519	0.255	1.32652e-05	MHB.2	tshz1
adka1	6.59595e-10	0.510435	0.943	0.8	1.35243e-05	MHB.2	adka
apba1b	7.50875e-10	0.296857	0.311	0.111	1.5396e-05	MHB.2	apba1b
vegfc2	8.94992e-10	0.260434	0.274	0.09	1.83509e-05	MHB.2	vegfc
jarid2b3	1.00589e-09	0.375491	1	0.969	2.06249e-05	MHB.2	jarid2b
scube24	1.01056e-09	0.36886	0.736	0.397	2.07205e-05	MHB.2	scube2
celsr1b4	1.01348e-09	0.438575	0.84	0.504	2.07804e-05	MHB.2	celsr1b
pvrl2l4	1.14853e-09	0.492969	0.887	0.566	2.35494e-05	MHB.2	pvrl2l
st3gal2	1.19541e-09	0.263045	0.302	0.107	2.45107e-05	MHB.2	st3gal2
trabd2a1	1.34477e-09	0.329106	0.34	0.132	2.75731e-05	MHB.2	trabd2a
blmh4	1.4538e-09	0.441014	0.887	0.633	2.98087e-05	MHB.2	blmh
igdcc42	1.68671e-09	0.4177	0.774	0.486	3.45844e-05	MHB.2	igdcc4
ece2a	1.75276e-09	0.387112	0.557	0.276	3.59385e-05	MHB.2	ece2a
lrrfip1a	1.85906e-09	0.375807	0.575	0.306	3.81182e-05	MHB.2	lrrfip1a
usp24	1.9177e-09	0.498766	0.84	0.606	3.93205e-05	MHB.2	usp24
sesn31	1.97478e-09	0.502144	0.302	0.116	4.04908e-05	MHB.2	sesn3
ccser2a	2.02111e-09	0.295271	0.368	0.15	4.14408e-05	MHB.2	ccser2a
hipk21	2.03909e-09	0.506158	0.802	0.592	4.18094e-05	MHB.2	hipk2
fnbp1a2	2.08036e-09	0.451945	0.5	0.251	4.26557e-05	MHB.2	fnbp1a
hif1an	2.13616e-09	0.454539	0.425	0.199	4.37998e-05	MHB.2	hif1an
msi2a	2.35627e-09	0.363945	0.528	0.262	4.8313e-05	MHB.2	msi2a
ncl1	2.65208e-09	0.42964	0.915	0.749	5.43783e-05	MHB.2	ncl
zgc:1107961	2.66868e-09	0.436524	0.67	0.398	5.47186e-05	MHB.2	zgc:110796
bcor	2.73829e-09	0.435517	0.736	0.443	5.61459e-05	MHB.2	bcor
nap1l13	3.60049e-09	0.449329	0.849	0.595	7.38245e-05	MHB.2	nap1l1
celsr1a1	5.38293e-09	0.373157	0.849	0.539	0.000110372	MHB.2	celsr1a
col4a51	6.05376e-09	0.421373	0.792	0.489	0.000124126	MHB.2	col4a5
adam15	6.85214e-09	0.402001	0.302	0.118	0.000140496	MHB.2	adam15
pho1	7.37658e-09	0.510281	0.679	0.398	0.000151249	MHB.2	pho
madd	7.82696e-09	0.44156	0.528	0.279	0.000160484	MHB.2	madd
gli33	7.87535e-09	0.68137	0.972	0.869	0.000161476	MHB.2	gli3
plp1a4	8.97081e-09	0.423054	0.519	0.249	0.000183937	MHB.2	plp1a
tktb	1.02027e-08	0.313712	0.302	0.119	0.000209196	MHB.2	tktb
thrab	1.06427e-08	0.52007	0.651	0.413	0.000218218	MHB.2	thrab
tle3a1	1.06874e-08	0.406547	0.745	0.471	0.000219133	MHB.2	tle3a
mllt103	1.10112e-08	0.378078	0.991	0.884	0.000225775	MHB.2	mllt10
aldocb	1.14045e-08	0.250937	0.255	0.088	0.000233838	MHB.2	aldocb
si:ch73-335l21.11	1.19223e-08	0.415347	0.632	0.363	0.000244454	MHB.2	si:ch73-335l21.1
suz12a	1.26227e-08	0.458411	0.642	0.412	0.000258815	MHB.2	suz12a
zgc:1586891	1.53347e-08	0.336495	0.481	0.238	0.000314423	MHB.2	zgc:158689
plekha7b4	2.04746e-08	0.353554	0.651	0.369	0.000419811	MHB.2	plekha7b
slc29a1a1	2.10041e-08	0.413062	0.689	0.429	0.000430669	MHB.2	slc29a1a
sept9b	2.16518e-08	0.252905	0.415	0.186	0.000443949	MHB.2	sept9b
nudt14	2.35499e-08	0.372175	0.377	0.171	0.000482867	MHB.2	nudt14
abcb5	2.40759e-08	0.385116	0.368	0.158	0.000493653	MHB.2	abcb5
tox6	2.71913e-08	0.396859	0.953	0.749	0.000557531	MHB.2	tox
hephl1a2	2.72694e-08	0.393538	0.519	0.268	0.000559132	MHB.2	hephl1a
NAV13	2.83953e-08	0.612911	0.774	0.546	0.000582217	MHB.2	NAV1
ptprua	3.16251e-08	0.523053	0.415	0.201	0.000648441	MHB.2	ptprua
cxxc5a1	3.25231e-08	0.368512	0.642	0.355	0.000666853	MHB.2	cxxc5a
plce11	3.72085e-08	0.311959	0.538	0.287	0.000762923	MHB.2	plce1
heatr11	3.77106e-08	0.388174	0.821	0.587	0.000773217	MHB.2	heatr1
bop1	3.99482e-08	0.453713	0.811	0.651	0.000819098	MHB.2	bop1
FQ311928.1	4.17841e-08	0.522064	0.377	0.176	0.000856741	MHB.2	FQ311928.1
frmd4ba2	4.23245e-08	0.487423	0.811	0.602	0.000867821	MHB.2	frmd4ba
zfhx3	4.31281e-08	0.339735	0.538	0.28	0.0008843	MHB.2	zfhx3
cad1	4.656e-08	0.451329	0.726	0.49	0.000954667	MHB.2	cad
pprc11	4.74319e-08	0.415139	0.689	0.416	0.000972544	MHB.2	pprc1
ifrd2	6.09321e-08	0.276339	0.472	0.234	0.00124935	MHB.2	ifrd2
nos1apa.13	6.26236e-08	0.51805	0.896	0.696	0.00128403	MHB.2	nos1apa.1
btg3	6.49395e-08	0.442593	0.575	0.332	0.00133152	MHB.2	btg3
arid5b	6.53767e-08	0.458624	0.547	0.314	0.00134048	MHB.2	arid5b
enc1	6.68507e-08	0.399867	0.519	0.283	0.00137071	MHB.2	enc1
mocs3	7.23606e-08	0.314754	0.425	0.205	0.00148368	MHB.2	mocs3
arhgef10	9.0587e-08	0.333791	0.491	0.254	0.0018574	MHB.2	arhgef10
mrpl11	1.00694e-07	0.337038	0.434	0.215	0.00206463	MHB.2	mrpl11
gli2b3	1.02126e-07	0.377054	0.613	0.357	0.002094	MHB.2	gli2b
si:ch211-168f7.52	1.02426e-07	0.419292	0.717	0.47	0.00210014	MHB.2	si:ch211-168f7.5
ttc27	1.09445e-07	0.442414	0.623	0.399	0.00224406	MHB.2	ttc27
si:ch73-266f23.3	1.17408e-07	0.280724	0.34	0.151	0.00240734	MHB.2	si:ch73-266f23.3
soga11	1.26165e-07	0.41378	0.83	0.589	0.00258688	MHB.2	soga1
CU855936.2	1.34005e-07	0.265936	0.321	0.134	0.00274764	MHB.2	CU855936.2
arhgef10la3	1.36838e-07	0.427185	0.575	0.338	0.00280572	MHB.2	arhgef10la
foxn2b1	1.37157e-07	0.341838	0.425	0.218	0.00281226	MHB.2	foxn2b
ipo112	1.42994e-07	0.442789	0.868	0.69	0.00293196	MHB.2	ipo11
greb14	1.52715e-07	0.30555	0.896	0.636	0.00313127	MHB.2	greb1
ripor1	1.6035e-07	0.419029	0.83	0.623	0.00328782	MHB.2	ripor1
mibp2	1.61516e-07	0.278182	0.396	0.191	0.00331172	MHB.2	mibp2
fat3a4	1.76134e-07	0.363637	0.896	0.648	0.00361144	MHB.2	fat3a
dnmbp	1.77595e-07	0.378288	0.519	0.284	0.00364141	MHB.2	dnmbp
fhdc12	1.92691e-07	0.300375	0.443	0.221	0.00395093	MHB.2	fhdc1
nf1b1	1.9555e-07	0.338831	0.66	0.416	0.00400955	MHB.2	nf1b
nasp3	1.95894e-07	0.38505	0.623	0.375	0.00401662	MHB.2	nasp
mybbp1a1	1.96211e-07	0.431104	0.774	0.593	0.00402311	MHB.2	mybbp1a
ldha	1.97553e-07	0.250876	0.226	0.082	0.00405063	MHB.2	ldha
nop58	2.28424e-07	0.380116	0.764	0.533	0.00468361	MHB.2	nop58
slc7a3b	2.34671e-07	0.31869	0.679	0.408	0.0048117	MHB.2	slc7a3b
asap1b	2.369e-07	0.389151	0.623	0.377	0.0048574	MHB.2	asap1b
hs6st1a1	2.5196e-07	0.28676	0.689	0.413	0.00516619	MHB.2	hs6st1a
si:ch211-212k18.53	2.69932e-07	0.262877	0.557	0.305	0.00553469	MHB.2	si:ch211-212k18.5
mex3b3	2.93353e-07	0.338956	0.425	0.218	0.00601491	MHB.2	mex3b
dgkh1	3.01179e-07	0.444804	0.538	0.32	0.00617537	MHB.2	dgkh
npm1a1	3.02357e-07	0.328816	0.821	0.572	0.00619952	MHB.2	npm1a
gpt2l	3.52265e-07	0.26603	0.33	0.147	0.00722285	MHB.2	gpt2l
ctdp12	4.02538e-07	0.406275	0.943	0.844	0.00825363	MHB.2	ctdp1
hspa91	5.43363e-07	0.376755	0.642	0.413	0.0111411	MHB.2	hspa9
ptdss2	5.65315e-07	0.325172	0.472	0.257	0.0115912	MHB.2	ptdss2
cdk62	6.00326e-07	0.336874	0.764	0.486	0.0123091	MHB.2	cdk6
mrpl12	6.60705e-07	0.318877	0.406	0.207	0.0135471	MHB.2	mrpl12
pbx3b3	6.61371e-07	0.322169	0.434	0.221	0.0135607	MHB.2	pbx3b
ncam1b3	6.89705e-07	0.327902	0.491	0.264	0.0141417	MHB.2	ncam1b
rrp9	7.13686e-07	0.279237	0.443	0.232	0.0146334	MHB.2	rrp9
uck2a	7.32219e-07	0.281124	0.453	0.24	0.0150134	MHB.2	uck2a
gmps1	8.43535e-07	0.36317	0.849	0.636	0.0172958	MHB.2	gmps
naa40.11	8.68461e-07	0.348286	0.491	0.286	0.0178069	MHB.2	naa40.1
slc6a9	8.73365e-07	0.383687	0.453	0.245	0.0179075	MHB.2	slc6a9
baz1a.1	8.78898e-07	0.363996	0.679	0.483	0.0180209	MHB.2	baz1a.1
smpd4	9.72061e-07	0.288723	0.613	0.377	0.0199311	MHB.2	smpd4
epb41a4	1.26747e-06	0.318503	0.821	0.552	0.0259882	MHB.2	epb41a
zmym4	1.34085e-06	0.331432	0.594	0.366	0.0274928	MHB.2	zmym4
kcnn2	1.35963e-06	0.268718	0.321	0.148	0.0278778	MHB.2	kcnn2
ephb2a	1.63122e-06	0.251736	0.264	0.111	0.0334466	MHB.2	ephb2a
nup37	1.68406e-06	0.332081	0.415	0.222	0.03453	MHB.2	nup37
uck2b	1.93185e-06	0.327432	0.5	0.282	0.0396106	MHB.2	uck2b
mpped2a	2.00359e-06	0.254739	0.453	0.239	0.0410815	MHB.2	mpped2a
atm	2.30002e-06	0.386945	0.604	0.391	0.0471597	MHB.2	atm
klhdc4	2.32444e-06	0.271862	0.406	0.209	0.0476603	MHB.2	klhdc4
ctps1a1	2.36636e-06	0.314036	0.943	0.771	0.0485198	MHB.2	ctps1a
meis2a2	2.37071e-06	0.262197	0.396	0.197	0.0486091	MHB.2	meis2a
dnmt3bb.1	2.64297e-06	0.255453	0.358	0.174	0.0541914	MHB.2	dnmt3bb.1
cluha	2.75623e-06	0.328105	0.453	0.263	0.0565137	MHB.2	cluha
kmt2a	2.91017e-06	0.36624	0.717	0.512	0.05967	MHB.2	kmt2a
phf20b1	2.91157e-06	0.337912	0.613	0.4	0.0596989	MHB.2	phf20b
nop561	3.005e-06	0.328463	0.962	0.864	0.0616146	MHB.2	nop56
ttll4	3.13888e-06	0.335565	0.594	0.375	0.0643595	MHB.2	ttll4
trit1	3.15608e-06	0.366083	0.708	0.535	0.0647123	MHB.2	trit1
fynb	3.15739e-06	0.259284	0.368	0.189	0.0647391	MHB.2	fynb
atic	3.44643e-06	0.282688	0.377	0.193	0.0706657	MHB.2	atic
camk2b1	3.51253e-06	0.325198	0.311	0.15	0.0720208	MHB.2	camk2b1
chn12	3.79609e-06	0.308455	0.679	0.45	0.0778351	MHB.2	chn1
aif1l	3.83302e-06	0.306562	0.462	0.268	0.0785923	MHB.2	aif1l
si:ch211-137a8.43	3.90722e-06	0.365943	0.528	0.322	0.0801136	MHB.2	si:ch211-137a8.4
rrp8	4.10814e-06	0.28354	0.547	0.327	0.0842332	MHB.2	rrp8
acsl4a	4.38603e-06	0.275812	0.255	0.113	0.0899311	MHB.2	acsl4a
kirrel1a1	4.70771e-06	0.339081	0.849	0.63	0.096527	MHB.2	kirrel1a
efl1	5.02464e-06	0.348733	0.453	0.263	0.103025	MHB.2	efl1
atp2a2b1	5.38826e-06	0.287473	0.783	0.536	0.110481	MHB.2	atp2a2b
mthfd1b	6.00731e-06	0.34918	0.481	0.291	0.123174	MHB.2	mthfd1b
nkain1	6.86068e-06	0.276316	0.396	0.217	0.140671	MHB.2	nkain1
cbx3a1	7.10993e-06	0.289087	0.623	0.401	0.145782	MHB.2	cbx3a
si:dkey-239h2.3	7.15213e-06	0.325827	0.792	0.617	0.146647	MHB.2	si:dkey-239h2.3
tiparp	7.21601e-06	0.360485	0.453	0.259	0.147957	MHB.2	tiparp
zfpm2b1	7.34327e-06	0.288234	0.198	0.076	0.150566	MHB.2	zfpm2b
sntb1	7.70103e-06	0.270798	0.292	0.138	0.157902	MHB.2	sntb1
msh61	8.62843e-06	0.367464	0.557	0.345	0.176917	MHB.2	msh6
tet21	8.63803e-06	0.296575	0.67	0.428	0.177114	MHB.2	tet2
zgc:1531153	8.71325e-06	0.310141	0.679	0.46	0.178657	MHB.2	zgc:153115
wdr18	8.83707e-06	0.37205	0.915	0.739	0.181195	MHB.2	wdr18
zmp:00000009362	9.03615e-06	0.43588	0.358	0.197	0.185277	MHB.2	zmp:0000000936
prex11	9.34476e-06	0.335163	0.557	0.345	0.191605	MHB.2	prex1
pcna1	9.46761e-06	0.383716	0.698	0.476	0.194124	MHB.2	pcna
fbl1	9.47406e-06	0.269939	0.66	0.437	0.194256	MHB.2	fbl
kcnd1	9.60103e-06	0.300773	0.264	0.122	0.196859	MHB.2	kcnd1
rpl5a	1.00113e-05	0.3065	0.925	0.749	0.205271	MHB.2	rpl5a
pa2g4a	1.04657e-05	0.30285	0.519	0.319	0.21459	MHB.2	pa2g4a
tlcd4a	1.05079e-05	0.274005	0.321	0.16	0.215455	MHB.2	tlcd4a
eef1g	1.0671e-05	0.28205	0.858	0.648	0.218799	MHB.2	eef1g
FOXK2	1.09749e-05	0.361955	0.632	0.459	0.22503	MHB.2	FOXK2
slc23a21	1.23316e-05	0.269464	0.5	0.301	0.252848	MHB.2	slc23a2
larp4ab	1.4357e-05	0.275773	0.585	0.379	0.294375	MHB.2	larp4ab
tusc33	1.46458e-05	0.280577	0.613	0.379	0.300298	MHB.2	tusc3
arhgef18a3	1.52987e-05	0.25997	0.472	0.274	0.313684	MHB.2	arhgef18a
gldc	1.62608e-05	0.267409	0.321	0.164	0.333411	MHB.2	gldc
slc12a2	1.73806e-05	0.328766	0.745	0.563	0.356371	MHB.2	slc12a2
picalma	1.8337e-05	0.306903	0.585	0.384	0.375982	MHB.2	picalma
ranbp1	1.84066e-05	0.259438	0.519	0.324	0.37741	MHB.2	ranbp1
CR339054.7	1.87694e-05	0.259791	0.698	0.483	0.384848	MHB.2	CR339054.7
cadm1a4	1.93931e-05	0.267698	0.802	0.546	0.397635	MHB.2	cadm1a
ddx181	1.95111e-05	0.305311	0.868	0.738	0.400056	MHB.2	ddx18
si:ch211-158d24.2	2.01014e-05	0.328331	0.34	0.179	0.412159	MHB.2	si:ch211-158d24.2
si:ch211-207i1.21	2.01318e-05	0.328926	0.425	0.248	0.412782	MHB.2	si:ch211-207i1.2
tfap4	2.01561e-05	0.323477	0.84	0.687	0.41328	MHB.2	tfap4
polr3a	2.04801e-05	0.320124	0.406	0.239	0.419924	MHB.2	polr3a
ttyh3b	2.15082e-05	0.292841	0.519	0.317	0.441004	MHB.2	ttyh3b
rab11fip33	2.18183e-05	0.276452	0.425	0.242	0.447363	MHB.2	rab11fip3
tdh	2.24346e-05	0.280677	0.396	0.223	0.46	MHB.2	tdh
wdr75	2.25939e-05	0.271929	0.604	0.398	0.463266	MHB.2	wdr75
diaph3	2.32981e-05	0.314253	0.698	0.499	0.477704	MHB.2	diaph3
fxyd6l	2.34563e-05	0.275728	0.547	0.35	0.480949	MHB.2	fxyd6l
mcm21	2.51428e-05	0.484224	0.575	0.406	0.515528	MHB.2	mcm2
phgdh2	2.58378e-05	0.312797	0.443	0.267	0.529778	MHB.2	phgdh
spag9a2	2.69672e-05	0.311003	0.755	0.544	0.552935	MHB.2	spag9a
e2f33	2.78503e-05	0.338678	0.811	0.655	0.571043	MHB.2	e2f3
ulk4	2.9558e-05	0.260187	0.472	0.275	0.606057	MHB.2	ulk4
taar10	3.04787e-05	0.305951	0.283	0.145	0.624934	MHB.2	taar10
kcnk5a3	3.0653e-05	0.279335	0.462	0.272	0.62851	MHB.2	kcnk5a
nop53	3.32027e-05	0.253592	0.585	0.384	0.680789	MHB.2	nop53
c1qbp	3.35788e-05	0.258641	0.34	0.181	0.6885	MHB.2	c1qbp
dkc11	3.4235e-05	0.342319	0.811	0.716	0.701954	MHB.2	dkc1
prmt11	3.56567e-05	0.28145	0.783	0.565	0.731105	MHB.2	prmt1
mars1	3.57765e-05	0.274893	0.481	0.298	0.733562	MHB.2	mars1
slc38a4	3.69615e-05	0.306165	0.594	0.407	0.757859	MHB.2	slc38a4
slx4ip1	3.7523e-05	0.296793	0.519	0.336	0.769371	MHB.2	slx4ip
nol61	3.89779e-05	0.251934	0.604	0.4	0.799202	MHB.2	nol6
eef2a.1	4.45638e-05	0.315307	0.67	0.48	0.913736	MHB.2	eef2a.1
intu	4.50999e-05	0.258379	0.453	0.276	0.924729	MHB.2	intu
prmt5	4.53265e-05	0.254614	0.481	0.298	0.929375	MHB.2	prmt5
pwp2h1	4.59128e-05	0.34332	0.821	0.653	0.941395	MHB.2	pwp2h
pabpn1	5.48479e-05	0.261258	0.887	0.805	1	MHB.2	pabpn1
mcm53	5.64673e-05	0.302599	0.623	0.407	1	MHB.2	mcm5
pdcd111	5.6547e-05	0.287594	0.689	0.493	1	MHB.2	pdcd11
ppan	5.65571e-05	0.272168	0.632	0.428	1	MHB.2	ppan
ahsa1b	6.538e-05	0.262542	0.5	0.308	1	MHB.2	ahsa1b
ppa1b	6.54305e-05	0.274765	0.358	0.204	1	MHB.2	ppa1b
ttc14	6.59757e-05	0.311232	0.547	0.37	1	MHB.2	ttc14
raph1b	6.61427e-05	0.317959	0.708	0.546	1	MHB.2	raph1b
slc38a3b	6.73581e-05	0.300278	0.566	0.385	1	MHB.2	slc38a3b
kat2a	6.97258e-05	0.255082	0.453	0.276	1	MHB.2	kat2a
snu13b	7.40868e-05	0.306725	0.472	0.304	1	MHB.2	snu13b
parp1	7.63429e-05	0.288463	0.783	0.586	1	MHB.2	parp1
ttll71	9.13581e-05	0.270158	0.425	0.253	1	MHB.2	ttll7
cables2a1	9.58839e-05	0.293751	0.519	0.338	1	MHB.2	cables2a
adcy6b	0.000100857	0.253339	0.575	0.387	1	MHB.2	adcy6b
rnf443	0.000103478	0.330016	0.83	0.694	1	MHB.2	rnf44
chtf18	0.00010418	0.255106	0.425	0.26	1	MHB.2	chtf18
eif3ea	0.000116734	0.310891	0.83	0.725	1	MHB.2	eif3ea
wasf3b3	0.000127275	0.297765	0.717	0.539	1	MHB.2	wasf3b
pola13	0.00012899	0.398331	0.736	0.58	1	MHB.2	pola1
si:dkey-151g10.6	0.000138454	0.29737	0.972	0.947	1	MHB.2	si:dkey-151g10.6
myo9aa	0.000144914	0.276873	0.679	0.512	1	MHB.2	myo9aa
grb10a1	0.000145838	0.311845	0.915	0.804	1	MHB.2	grb10a
eif4a2	0.000145929	0.288643	0.736	0.586	1	MHB.2	eif4a2
ktn1	0.000146509	0.310723	0.736	0.569	1	MHB.2	ktn1
immp2l1	0.000157903	0.346092	0.491	0.325	1	MHB.2	immp2l
cct5	0.000161416	0.273244	0.472	0.303	1	MHB.2	cct5
metap1	0.000162519	0.279228	0.679	0.518	1	MHB.2	metap1
chd4b1	0.000170524	0.333706	0.915	0.843	1	MHB.2	chd4b
kri1	0.000179235	0.325696	0.519	0.36	1	MHB.2	kri1
lrmda	0.000186967	0.347046	0.311	0.172	1	MHB.2	lrmda
esf1	0.000196103	0.294882	0.481	0.322	1	MHB.2	esf1
mcm62	0.000207207	0.323684	0.547	0.376	1	MHB.2	mcm6
polr1a1	0.000208662	0.2785	0.651	0.463	1	MHB.2	polr1a
[truncated: 14,113 more rows]

## Sheet: 5.HB16hpf_WT_all_clusters
	p_val	avg_log2FC	pct.1	pct.2	p_val_adj	cluster	gene
cyp26b1	7.27892e-105	1.98128	0.561	0.041	1.46277e-100	r2/r4	cyp26b1
nr2f1b	3.46245e-62	1.13518	0.662	0.121	6.95813e-58	r2/r4	nr2f1b
chl1b	6.88165e-44	1.07272	0.719	0.204	1.38294e-39	r2/r4	chl1b
sema5ba	1.7299e-41	1.20372	0.914	0.381	3.4764e-37	r2/r4	sema5ba
LHFPL6	1.93233e-40	1.04748	0.525	0.118	3.88321e-36	r2/r4	LHFPL6
nr2f2	4.26358e-38	1.11774	0.82	0.34	8.56808e-34	r2/r4	nr2f2
pcdh19	6.35886e-38	1.16112	0.986	0.623	1.27788e-33	r2/r4	pcdh19
rasal2	4.44818e-37	1.12186	0.957	0.655	8.93906e-33	r2/r4	rasal2
mpz	2.60067e-36	0.927705	0.511	0.116	5.22631e-32	r2/r4	mpz
jag2b	4.04634e-36	1.06319	0.971	0.595	8.13152e-32	r2/r4	jag2b
epha4b	1.96052e-34	1.15108	0.906	0.472	3.93987e-30	r2/r4	epha4b
ptprnb	6.29958e-33	1.01124	0.856	0.371	1.26596e-28	r2/r4	ptprnb
plp1a	1.35329e-32	0.988184	0.878	0.394	2.71956e-28	r2/r4	plp1a
crb1	5.32259e-32	0.932544	0.662	0.231	1.06963e-27	r2/r4	crb1
efna2a	6.14446e-32	1.5523	0.849	0.462	1.23479e-27	r2/r4	efna2a
cntfr	9.30437e-32	1.22521	0.978	0.707	1.86981e-27	r2/r4	cntfr
robo4	7.57099e-31	0.988311	0.655	0.227	1.52147e-26	r2/r4	robo4
ptprn2	2.56814e-29	0.858322	0.777	0.316	5.16094e-25	r2/r4	ptprn2
sox13	3.12845e-29	1.26438	0.835	0.454	6.28692e-25	r2/r4	sox13
gas7a	4.38171e-28	0.657867	0.468	0.125	8.80549e-24	r2/r4	gas7a
zeb2b	6.93037e-28	0.613936	0.54	0.161	1.39273e-23	r2/r4	zeb2b
ptprfb	1.01988e-27	0.899244	0.986	0.889	2.04956e-23	r2/r4	ptprfb
adgrl2a	2.24551e-27	0.877561	0.971	0.78	4.51257e-23	r2/r4	adgrl2a
pou3f3b	2.76365e-27	0.688051	0.568	0.189	5.55383e-23	r2/r4	pou3f3b
adgrv1	1.37758e-25	0.930717	0.914	0.539	2.76838e-21	r2/r4	adgrv1
nova2	2.63398e-25	0.85268	0.978	0.601	5.29324e-21	r2/r4	nova2
ndst3	6.59491e-25	0.844594	0.568	0.204	1.32531e-20	r2/r4	ndst3
zbtb16a	2.12424e-24	0.763388	0.993	0.893	4.26888e-20	r2/r4	zbtb16a
msi1	2.13736e-24	0.779485	0.942	0.5	4.29525e-20	r2/r4	msi1
pax6a	9.28576e-24	0.94227	0.511	0.172	1.86607e-19	r2/r4	pax6a
ptprna	2.02014e-23	0.682811	0.727	0.311	4.05968e-19	r2/r4	ptprna
pvrl2l	2.24088e-23	0.832725	0.964	0.575	4.50328e-19	r2/r4	pvrl2l
sulf2b	2.37303e-23	1.0343	0.331	0.078	4.76883e-19	r2/r4	sulf2b
bmpr1ba	2.04278e-22	0.762539	0.827	0.407	4.10517e-18	r2/r4	bmpr1ba
lamb2l	2.488e-22	0.671471	0.604	0.236	4.99989e-18	r2/r4	lamb2l
vwa7	5.94332e-22	0.654639	0.482	0.16	1.19437e-17	r2/r4	vwa7
auts2b	2.90772e-21	0.844539	0.583	0.245	5.84335e-17	r2/r4	auts2b
si:dkey-35m8.1	3.00723e-21	0.973167	0.59	0.252	6.04332e-17	r2/r4	si:dkey-35m8.1
st8sia2	3.74811e-21	0.638376	0.655	0.281	7.53219e-17	r2/r4	st8sia2
tet3	1.0145e-19	0.682711	0.942	0.741	2.03873e-15	r2/r4	tet3
ephb2b	1.28462e-19	0.769758	0.691	0.341	2.58158e-15	r2/r4	ephb2b
hs3st3b1b	3.09063e-19	0.62501	0.734	0.353	6.21094e-15	r2/r4	hs3st3b1b
mapk11	4.6219e-19	0.544506	0.511	0.196	9.28816e-15	r2/r4	mapk11
cspg5a	1.39031e-18	0.598493	0.683	0.305	2.79397e-14	r2/r4	cspg5a
acsl2	1.43322e-18	0.597384	0.647	0.298	2.88019e-14	r2/r4	acsl2
rgs3b	1.56851e-18	0.536112	0.518	0.197	3.15208e-14	r2/r4	rgs3b
fhod3b	2.88533e-18	1.02909	0.719	0.387	5.79837e-14	r2/r4	fhod3b
epha7	3.07231e-18	1.01756	0.784	0.502	6.17412e-14	r2/r4	epha7
irx3a	3.56406e-18	0.444413	0.453	0.159	7.16234e-14	r2/r4	irx3a
cadm1a	4.26599e-18	0.725838	0.899	0.541	8.57293e-14	r2/r4	cadm1a
fat3a	4.29388e-18	0.673484	0.914	0.6	8.62898e-14	r2/r4	fat3a
cdh7a	5.40009e-18	0.997604	0.504	0.2	1.0852e-13	r2/r4	cdh7a
CT990561.1	7.24708e-18	0.883842	0.468	0.176	1.45637e-13	r2/r4	CT990561.1
efnb3b	1.04673e-17	0.630543	0.942	0.675	2.10351e-13	r2/r4	efnb3b
qkib	1.94945e-17	0.663866	0.669	0.32	3.91761e-13	r2/r4	qkib
robo1	2.01736e-17	0.665791	0.964	0.805	4.05409e-13	r2/r4	robo1
lmo3	2.20351e-17	0.598343	0.482	0.181	4.42817e-13	r2/r4	lmo3
arhgef10la	8.03643e-17	0.628722	0.64	0.318	1.615e-12	r2/r4	arhgef10la
ncam1a	8.73997e-17	0.583901	0.986	0.575	1.75638e-12	r2/r4	ncam1a
fhdc1	1.29544e-16	0.477121	0.597	0.258	2.60332e-12	r2/r4	fhdc1
sh2d3ca	1.47294e-16	0.532834	0.518	0.218	2.96003e-12	r2/r4	sh2d3ca
epb41a	1.71026e-16	0.586791	0.878	0.524	3.43694e-12	r2/r4	epb41a
mn1a	2.6073e-16	0.479695	0.46	0.172	5.23963e-12	r2/r4	mn1a
skap2	2.69678e-16	0.334817	0.259	0.065	5.41945e-12	r2/r4	skap2
blmh	5.11504e-16	0.538846	0.878	0.591	1.02792e-11	r2/r4	blmh
lrp2a	1.47826e-15	0.542696	0.791	0.445	2.9707e-11	r2/r4	lrp2a
lrig1	1.94326e-15	0.630562	0.885	0.606	3.90519e-11	r2/r4	lrig1
pax7b	2.0353e-15	1.04288	0.403	0.155	4.09014e-11	r2/r4	pax7b
plch1	2.23525e-15	0.484174	0.892	0.531	4.49196e-11	r2/r4	plch1
srgap1a	2.46981e-15	0.579831	0.928	0.711	4.96333e-11	r2/r4	srgap1a
celsr1b	2.53826e-15	0.651079	0.727	0.405	5.10088e-11	r2/r4	celsr1b
SFMBT1	7.61481e-15	0.483106	0.381	0.142	1.53027e-10	r2/r4	SFMBT1
clstn1	8.12179e-15	0.502494	0.547	0.248	1.63215e-10	r2/r4	clstn1
sfrp1a	1.00255e-14	0.492603	0.281	0.083	2.01473e-10	r2/r4	sfrp1a
ANOS1	1.13921e-14	0.370994	0.345	0.112	2.28936e-10	r2/r4	ANOS1
c4b	2.16203e-14	0.390495	0.288	0.086	4.34482e-10	r2/r4	c4b
si:ch211-286o17.1	3.3976e-14	0.6008	0.748	0.46	6.82781e-10	r2/r4	si:ch211-286o17.1
shroom4	3.57575e-14	0.609863	0.755	0.519	7.18584e-10	r2/r4	shroom4
sfrp5	5.12339e-14	0.650993	0.324	0.108	1.0296e-09	r2/r4	sfrp5
dbx1b	5.66465e-14	0.276555	0.165	0.032	1.13837e-09	r2/r4	dbx1b
tox	5.73449e-14	0.549158	0.935	0.66	1.1524e-09	r2/r4	tox
BX324164.5	2.29674e-13	0.370994	0.353	0.128	4.61553e-09	r2/r4	BX324164.5
ncalda	2.46498e-13	0.464491	0.842	0.553	4.95362e-09	r2/r4	ncalda
lrp5	2.64506e-13	0.574457	0.849	0.698	5.31552e-09	r2/r4	lrp5
rfx4	3.55978e-13	0.443371	0.849	0.466	7.15374e-09	r2/r4	rfx4
FRMD5	4.24217e-13	0.42038	0.597	0.291	8.52507e-09	r2/r4	FRMD5
celf2	5.56518e-13	0.50871	0.691	0.384	1.11838e-08	r2/r4	celf2
si:ch211-137a8.4	6.76461e-13	0.4502	0.547	0.269	1.35942e-08	r2/r4	si:ch211-137a8.4
fgfr3	7.05814e-13	0.831217	0.777	0.53	1.4184e-08	r2/r4	fgfr3
si:dkey-151g10.3	7.40349e-13	0.477699	0.691	0.407	1.48781e-08	r2/r4	si:dkey-151g10.3
si:ch73-386h18.1	7.55936e-13	0.437587	0.813	0.473	1.51913e-08	r2/r4	si:ch73-386h18.1
mn1b	8.07753e-13	0.324968	0.374	0.143	1.62326e-08	r2/r4	mn1b
zeb2a	8.78777e-13	0.431795	0.928	0.615	1.76599e-08	r2/r4	zeb2a
hs2st1b	1.50494e-12	0.725934	0.662	0.41	3.02432e-08	r2/r4	hs2st1b
jarid2b	2.73031e-12	0.466151	0.957	0.888	5.48684e-08	r2/r4	jarid2b
si:ch211-212k18.5	5.92103e-12	0.45194	0.568	0.305	1.18989e-07	r2/r4	si:ch211-212k18.5
cercam	8.10042e-12	0.42408	0.518	0.258	1.62786e-07	r2/r4	cercam
nlgn3a	8.13205e-12	0.746472	0.396	0.168	1.63422e-07	r2/r4	nlgn3a
hapln1a	8.59526e-12	0.289687	0.345	0.127	1.7273e-07	r2/r4	hapln1a
negr1	8.97488e-12	0.481815	0.82	0.505	1.80359e-07	r2/r4	negr1
ntn1a	9.58576e-12	1.0323	0.662	0.426	1.92635e-07	r2/r4	ntn1a
nrarpb	9.63582e-12	0.33815	0.36	0.142	1.93641e-07	r2/r4	nrarpb
ek1	1.76366e-11	0.268906	0.353	0.133	3.54424e-07	r2/r4	ek1
mapk12b	1.92608e-11	0.282134	0.309	0.112	3.87065e-07	r2/r4	mapk12b
phf21aa	3.84731e-11	0.415889	0.719	0.433	7.73155e-07	r2/r4	phf21aa
gpm6bb	4.23752e-11	0.489035	0.525	0.284	8.51571e-07	r2/r4	gpm6bb
eml1	7.5465e-11	0.280316	0.36	0.14	1.51654e-06	r2/r4	eml1
BX284638.2	8.30647e-11	0.429238	0.784	0.487	1.66927e-06	r2/r4	BX284638.2
ildr2	8.71773e-11	0.390472	0.576	0.313	1.75192e-06	r2/r4	ildr2
ptch1	1.18168e-10	0.574965	0.806	0.604	2.37471e-06	r2/r4	ptch1
si:ch73-364h19.1	1.18617e-10	0.45196	0.353	0.153	2.38372e-06	r2/r4	si:ch73-364h19.1
zgc:158689	1.53295e-10	0.339093	0.453	0.215	3.08062e-06	r2/r4	zgc:158689
pax7a	1.72718e-10	0.951912	0.353	0.155	3.47093e-06	r2/r4	pax7a
tcf7l1a	1.75157e-10	0.426136	0.806	0.587	3.51995e-06	r2/r4	tcf7l1a
greb1	1.76029e-10	0.421366	0.892	0.618	3.53747e-06	r2/r4	greb1
arhgap12b	3.38802e-10	0.41387	0.777	0.503	6.80857e-06	r2/r4	arhgap12b
tenm4	3.8707e-10	0.681143	0.899	0.654	7.77855e-06	r2/r4	tenm4
ctnnd2b	5.01124e-10	0.397986	0.633	0.357	1.00706e-05	r2/r4	ctnnd2b
dtx4a	5.34864e-10	0.447062	0.612	0.363	1.07486e-05	r2/r4	dtx4a
nr2f1a	5.78761e-10	0.297761	0.381	0.169	1.16308e-05	r2/r4	nr2f1a
sox3	6.46682e-10	0.335959	0.446	0.214	1.29957e-05	r2/r4	sox3
rnd1b	9.13815e-10	0.404676	0.446	0.221	1.8364e-05	r2/r4	rnd1b
ank2b	9.53553e-10	0.518236	0.705	0.484	1.91626e-05	r2/r4	ank2b
sulf2a	1.02603e-09	0.511164	0.345	0.15	2.06191e-05	r2/r4	sulf2a
rnf220a	1.19417e-09	0.713137	0.64	0.415	2.3998e-05	r2/r4	rnf220a
arvcfb	1.24765e-09	0.468563	0.755	0.495	2.50727e-05	r2/r4	arvcfb
spock1	1.25514e-09	0.820123	0.259	0.099	2.52232e-05	r2/r4	spock1
fgfr2	1.25911e-09	0.42895	0.957	0.819	2.5303e-05	r2/r4	fgfr2
scube2	1.36847e-09	0.605009	0.54	0.312	2.75007e-05	r2/r4	scube2
nsd2	1.70515e-09	0.468142	0.669	0.436	3.42668e-05	r2/r4	nsd2
si:ch211-214c7.4	1.81706e-09	0.392303	0.417	0.205	3.65156e-05	r2/r4	si:ch211-214c7.4
gfap	2.02534e-09	0.380255	0.432	0.21	4.07013e-05	r2/r4	gfap
arhgef10lb	2.35274e-09	0.448263	0.482	0.261	4.72807e-05	r2/r4	arhgef10lb
ddr1	2.69578e-09	0.472012	0.734	0.52	5.41745e-05	r2/r4	ddr1
adarb1b	3.05607e-09	0.44675	0.878	0.725	6.14147e-05	r2/r4	adarb1b
hephl1a	3.20238e-09	0.336149	0.403	0.194	6.43551e-05	r2/r4	hephl1a
egfl6	3.50865e-09	0.489506	0.396	0.2	7.05099e-05	r2/r4	egfl6
sdk1b	3.83301e-09	0.366108	0.417	0.204	7.70282e-05	r2/r4	sdk1b
rrm1	4.24639e-09	0.465817	0.612	0.391	8.53354e-05	r2/r4	rrm1
plekha7b	4.46183e-09	0.433307	0.583	0.349	8.9665e-05	r2/r4	plekha7b
dennd2da	7.72924e-09	0.427735	0.446	0.236	0.000155327	r2/r4	dennd2da
ctdspl2a	8.50883e-09	0.362353	0.511	0.293	0.000170993	r2/r4	ctdspl2a
cdh2	8.75563e-09	0.412969	0.914	0.759	0.000175953	r2/r4	cdh2
dhx32b	9.47431e-09	0.321622	0.388	0.182	0.000190396	r2/r4	dhx32b
tusc3	1.00748e-08	0.431564	0.612	0.385	0.000202463	r2/r4	tusc3
dpysl5a	1.05444e-08	0.363463	0.388	0.189	0.0002119	r2/r4	dpysl5a
pou3f1	1.33641e-08	0.304019	0.273	0.11	0.000268565	r2/r4	pou3f1
nck2a	1.35607e-08	0.388949	0.77	0.526	0.000272516	r2/r4	nck2a
trim71	1.43282e-08	0.413311	0.842	0.71	0.00028794	r2/r4	trim71
tbl1xr1a	1.70076e-08	0.408711	0.964	0.821	0.000341785	r2/r4	tbl1xr1a
srgap2	2.09285e-08	0.436405	0.928	0.814	0.000420578	r2/r4	srgap2
odc1	2.47281e-08	0.448111	0.64	0.426	0.000496935	r2/r4	odc1
fsta	2.79163e-08	0.503581	0.381	0.189	0.000561006	r2/r4	fsta
LO018022.1	2.86753e-08	0.257838	0.259	0.103	0.000576259	r2/r4	LO018022.1
grasp	2.96898e-08	0.417269	0.381	0.189	0.000596647	r2/r4	grasp
fam168a	3.10743e-08	0.412653	0.863	0.71	0.000624468	r2/r4	fam168a
zbtb16b	4.8385e-08	0.351099	0.935	0.742	0.000972344	r2/r4	zbtb16b
zeb1b	5.67475e-08	0.433028	0.914	0.696	0.0011404	r2/r4	zeb1b
spag9a	7.12203e-08	0.413735	0.64	0.426	0.00143124	r2/r4	spag9a
b4galnt4a	9.66442e-08	0.283191	0.309	0.139	0.00194216	r2/r4	b4galnt4a
wasf3b	9.69782e-08	0.385405	0.683	0.459	0.00194887	r2/r4	wasf3b
cep152	1.21575e-07	0.31463	0.446	0.25	0.00244317	r2/r4	cep152
plekhg7	1.26762e-07	0.317569	0.36	0.178	0.0025474	r2/r4	plekhg7
ephb3a	1.30412e-07	0.431772	0.482	0.29	0.00262076	r2/r4	ephb3a
baz2ba	1.36597e-07	0.311015	0.942	0.824	0.00274505	r2/r4	baz2ba
pard3bb	1.41552e-07	0.368596	0.914	0.737	0.00284463	r2/r4	pard3bb
nav2a	1.49484e-07	0.325569	0.612	0.394	0.00300402	r2/r4	nav2a
shroom2a	1.50212e-07	0.381749	0.475	0.282	0.00301867	r2/r4	shroom2a
trps1	1.78193e-07	0.428379	0.799	0.637	0.00358096	r2/r4	trps1
sipa1l2	1.89246e-07	0.365495	0.827	0.628	0.0038031	r2/r4	sipa1l2
arhgap35a	2.00232e-07	0.343996	0.95	0.858	0.00402387	r2/r4	arhgap35a
phactr4b	2.45485e-07	0.344975	0.626	0.415	0.00493328	r2/r4	phactr4b
hmgn2	3.05735e-07	0.317362	0.763	0.562	0.00614405	r2/r4	hmgn2
prr12b	3.09896e-07	0.301369	0.604	0.384	0.00622767	r2/r4	prr12b
her8a	4.24776e-07	0.272449	0.417	0.225	0.0085363	r2/r4	her8a
si:ch1073-186i23.1	4.72025e-07	0.37897	0.432	0.257	0.00948582	r2/r4	si:ch1073-186i23.1
rad18	4.78525e-07	0.359976	0.561	0.35	0.00961643	r2/r4	rad18
igf2bp1	5.51143e-07	0.334084	0.964	0.895	0.0110758	r2/r4	igf2bp1
tnika	5.54373e-07	0.295443	0.626	0.399	0.0111407	r2/r4	tnika
pbx3b	5.90973e-07	0.468232	0.324	0.162	0.0118762	r2/r4	pbx3b
rab11fip3	6.08437e-07	0.264866	0.453	0.256	0.0122272	r2/r4	rab11fip3
2023-03-08	6.65324e-07	0.285818	0.59	0.372	0.0133703	r2/r4	2023-03-08
sardh	6.72683e-07	0.309944	0.317	0.156	0.0135182	r2/r4	sardh
lbr	9.23913e-07	0.293839	0.647	0.435	0.018567	r2/r4	lbr
rrm2.1	1.06752e-06	0.566887	0.647	0.477	0.0214529	r2/r4	rrm2.1
ptch2	1.07028e-06	0.401988	0.475	0.283	0.0215083	r2/r4	ptch2
magi2a	1.13959e-06	0.26772	0.597	0.374	0.0229011	r2/r4	magi2a
adamts3	1.14024e-06	0.450735	0.381	0.214	0.0229142	r2/r4	adamts3
fzd3a	1.19256e-06	0.337751	0.64	0.441	0.0239657	r2/r4	fzd3a
kaznb	1.2994e-06	0.391469	0.647	0.425	0.0261127	r2/r4	kaznb
znf536	1.56201e-06	0.397877	0.23	0.1	0.0313901	r2/r4	znf536
dennd5a	1.80487e-06	0.358703	0.626	0.426	0.0362706	r2/r4	dennd5a
gli3	1.81093e-06	0.31378	0.899	0.786	0.0363925	r2/r4	gli3
plagl2	1.9856e-06	0.310936	0.878	0.704	0.0399025	r2/r4	plagl2
si:ch73-1a9.3	1.99584e-06	0.358477	0.791	0.651	0.0401084	r2/r4	si:ch73-1a9.3
slx4ip	2.0561e-06	0.266597	0.468	0.276	0.0413194	r2/r4	slx4ip
baz1b	2.23203e-06	0.307324	0.691	0.503	0.0448549	r2/r4	baz1b
tox2	3.17004e-06	0.252906	0.59	0.384	0.0637052	r2/r4	tox2
zgc:110158	3.67538e-06	0.278966	0.806	0.613	0.0738605	r2/r4	zgc:110158
hmmr	4.10561e-06	0.304033	0.367	0.204	0.0825063	r2/r4	hmmr
zgc:110796	4.14873e-06	0.257726	0.511	0.317	0.0833728	r2/r4	zgc:110796
LO018148.1	4.29084e-06	0.379216	0.662	0.489	0.0862288	r2/r4	LO018148.1
myh14	4.6161e-06	0.321495	0.46	0.279	0.0927652	r2/r4	myh14
pknox2	4.96378e-06	0.300611	0.388	0.227	0.0997521	r2/r4	pknox2
zgc:173552.3	6.15361e-06	0.257002	0.489	0.304	0.123663	r2/r4	zgc:173552.3
map2k6	6.76485e-06	0.291817	0.691	0.499	0.135947	r2/r4	map2k6
nat8l	1.25398e-05	0.440128	0.705	0.526	0.252	r2/r4	nat8l
dtnba	1.68627e-05	0.281209	0.561	0.376	0.338872	r2/r4	dtnba
eme1	1.87462e-05	0.309415	0.489	0.328	0.376724	r2/r4	eme1
si:ch211-269k10.2	1.94452e-05	0.291189	0.388	0.229	0.390771	r2/r4	si:ch211-269k10.2
crb2a	2.10673e-05	0.254148	0.381	0.214	0.423369	r2/r4	crb2a
ctdp1	2.31343e-05	0.342422	0.885	0.765	0.464907	r2/r4	ctdp1
si:dkey-195m11.8	2.38651e-05	0.298027	0.669	0.511	0.479592	r2/r4	si:dkey-195m11.8
gli1	2.45268e-05	0.301927	0.54	0.364	0.492892	r2/r4	gli1
cep192	2.66557e-05	0.259814	0.597	0.417	0.535674	r2/r4	cep192
h2az2b	2.66558e-05	0.27246	0.727	0.553	0.535676	r2/r4	h2az2b
lin28a	2.71692e-05	0.360749	0.712	0.529	0.545992	r2/r4	lin28a
man1a2	3.0526e-05	0.259357	0.712	0.525	0.613451	r2/r4	man1a2
[truncated: 15,162 more rows]

## Sheet: 6.WE10hpf_WT_neural_clusters
gene	p_val	avg_log2FC	pct.1	pct.2	p_val_adj	cluster	gene
[truncated: 4,274 more rows]

[truncated: 2 more sheets: 7.HB13hpf_WT_neural_clusters, 8.HB16hpf_WT_neural_clusters]
