# Supplementary material for: scMultiome analysis identifies embryonic hindbrain progenitors with mixed rhombomere identities
Source: eLife. 2023 Nov 10;12:e87772. doi: 10.7554/eLife.87772 (PMC10662952; doi:10.7554/eLife.87772)
Supplement: Figure 4—source data 1. [file elife-87772-fig4-data1.xlsx]

## Sheet: 1.Description
	This workbook lists all TF binding motifs enriched in the indicated cluster, as follows:
	Sheet	Content
	1	Description
	2 to 74	List of all TF motifs enriched in the indicated cluster relative to all clusters present at the indicated timepoint
	The columns in each sheet contain the following information:
	Column	Information
	A	Motif ID
	B	p value
	C	fold change in motif enrichment between the specified cluster (sample 1) and all clusters (sample 2); expressed as log2 of average for all cells in each sample
	D	Percentage of cells in sample 1 containing motif
	E	Percentage of cells in sample 2 containing motif
	F	adjusted p value
	G	Motif ID
	H	Motif name

## Sheet: 2.HB13hpf.neural.r1
	p_val	avg_log2FC	pct.1	pct.2	p_val_adj	motif	motif.name
MA1494.1	6.29216e-11	2.31632	0.923	0.488	1.03569e-07	MA1494.1	HNF4A(var.2)
MA1148.1	6.03432e-08	1.46713	0.769	0.479	9.9325e-05	MA1148.1	PPARA::RXRA
MA0856.1	7.10896e-08	2.51038	0.821	0.471	0.000117014	MA0856.1	RXRG
MA1574.1	2.52622e-07	1.48417	0.769	0.486	0.000415815	MA1574.1	THRB
MA0504.1	2.99177e-07	1.0494	0.795	0.484	0.000492445	MA0504.1	NR2C2
MA0512.2	5.42508e-07	1.98913	0.846	0.492	0.000892968	MA0512.2	Rxra
MA1550.1	9.58495e-07	1.69704	0.821	0.486	0.00157768	MA1550.1	PPARD
MA0677.1	1.74869e-06	1.83409	0.795	0.49	0.00287834	MA0677.1	Nr2f6
MA0855.1	2.44523e-06	2.09211	0.846	0.485	0.00402484	MA0855.1	RXRB
MA0115.1	5.90067e-06	1.76363	0.769	0.474	0.0097125	MA0115.1	NR1H2::RXRA
MA1537.1	7.35942e-06	1.21235	0.795	0.48	0.0121136	MA1537.1	NR2F1(var.2)
MA0142.1	2.83111e-05	0.992272	0.744	0.492	0.0466001	MA0142.1	Pou5f1::Sox2
MA0065.2	9.92447e-05	1.00221	0.795	0.485	0.163357	MA0065.2	Pparg::Rxra
MA1535.1	0.000151919	2.39436	0.718	0.481	0.250059	MA1535.1	NR2C1
MA0017.2	0.000167996	1.69952	0.769	0.486	0.276522	MA0017.2	NR2F1
MA1111.1	0.000716237	1.22442	0.744	0.464	1	MA1111.1	NR2F2
MA0139.1	0.00104147	1.33688	0.641	0.474	1	MA0139.1	CTCF
MA0016.1	0.00230364	0.42347	0.692	0.484	1	MA0016.1	usp
MA1087.1	0.00320758	0.399369	0.744	0.464	1	MA1087.1	WRKY45
MA0657.1	0.00358763	0.551549	0.692	0.461	1	MA0657.1	KLF13
MA0728.1	0.00537364	0.375983	0.692	0.476	1	MA0728.1	Nr2f6(var.2)
MA0160.1	0.00800652	0.990405	0.641	0.471	1	MA0160.1	NR4A2
MA0071.1	0.00856231	0.384437	0.538	0.48	1	MA0071.1	RORA
MA1564.1	0.0189656	0.32333	0.615	0.498	1	MA1564.1	SP9
MA1533.1	0.0195119	0.834331	0.718	0.482	1	MA1533.1	NR1I2
MA0423.1	0.0272403	0.615294	0.615	0.492	1	MA0423.1	YER130C
MA1449.1	0.033209	0.366615	0.641	0.497	1	MA1449.1	hlh-30
MA0857.1	0.0356464	0.878792	0.59	0.504	1	MA0857.1	Rarb
MA0516.2	0.0499278	0.505858	0.641	0.526	1	MA0516.2	SP2
MA0985.1	0.0644247	0.411624	0.436	0.491	1	MA0985.1	DRE1C
MA0531.1	0.0841479	0.394729	0.641	0.476	1	MA0531.1	CTCF
MA1451.1	0.104876	0.629874	0.59	0.481	1	MA1451.1	nhr-6
MA0978.1	0.121606	0.484953	0.41	0.502	1	MA0978.1	DREB1E
MA0859.1	0.133968	0.595047	0.615	0.492	1	MA0859.1	Rarg
MA1418.1	0.170308	0.423398	0.564	0.488	1	MA1418.1	IRF3
MA0729.1	0.183496	0.270146	0.538	0.491	1	MA0729.1	RARA
MA0771.1	0.186002	0.593451	0.308	0.492	1	MA0771.1	HSF4
MA1390.1	0.196749	0.41598	0.385	0.507	1	MA1390.1	HHO2
MA0302.1	0.251811	0.422271	0.538	0.497	1	MA0302.1	GAT4
MA1630.1	0.300707	0.260035	0.59	0.499	1	MA1630.1	Znf281
MA1045.1	0.318172	0.263776	0.385	0.49	1	MA1045.1	NAC043
MA0784.1	0.36671	0.393656	0.462	0.49	1	MA0784.1	POU1F1
MA0463.2	0.387102	0.378196	0.41	0.462	1	MA0463.2	BCL6
MA1042.1	0.426818	0.272434	0.564	0.488	1	MA1042.1	MYB59
MA1388.1	0.439593	0.482293	0.59	0.505	1	MA1388.1	AT3G24120
MA0259.1	0.448038	0.741175	0.513	0.497	1	MA0259.1	ARNT::HIF1A
MA0788.1	0.472899	0.542776	0.564	0.474	1	MA0788.1	POU3F3
MA0578.1	0.586727	0.461898	0.513	0.479	1	MA0578.1	SPL8
MA1664.1	0.602817	1.14542	0.41	0.485	1	MA1664.1	HSFA6B
MA1665.1	0.626271	0.447389	0.487	0.454	1	MA1665.1	HSFB2A
MA0486.2	0.630646	0.280949	0.385	0.47	1	MA0486.2	HSF1
MA1255.1	0.721394	0.410687	0.436	0.483	1	MA1255.1	AT1G22810
MA1151.1	0.732383	0.450471	0.462	0.47	1	MA1151.1	RORC
MA1667.1	0.738161	1.03078	0.462	0.48	1	MA1667.1	HSFC1
MA1666.1	0.751526	1.64665	0.333	0.475	1	MA1666.1	HSFB2B
MA0676.1	0.761864	0.399238	0.462	0.498	1	MA0676.1	Nr2e1
MA0772.1	0.776625	0.359116	0.436	0.486	1	MA0772.1	IRF7
MA1625.1	0.801853	0.572406	0.487	0.485	1	MA1625.1	Stat5b
MA1675.1	0.824609	0.611508	0.462	0.474	1	MA1675.1	NAC029
MA1407.1	0.872603	0.603401	0.41	0.49	1	MA1407.1	bZIP14
MA1293.1	0.912575	0.642044	0.462	0.495	1	MA1293.1	MYB57

## Sheet: 3.HB13hpf.neural.r2
	p_val	avg_log2FC	pct.1	pct.2	p_val_adj	motif	motif.name
MA0808.1	4.06529e-14	1.14689	0.919	0.447	6.69146e-11	MA0808.1	TEAD3
MA0090.3	3.70001e-13	2.21427	0.919	0.434	6.09021e-10	MA0090.3	TEAD1
MA0809.2	6.78404e-13	3.53761	0.919	0.446	1.11665e-09	MA0809.2	TEAD4
MA1121.1	6.19581e-12	0.757873	0.919	0.439	1.01983e-08	MA1121.1	TEAD2
MA0406.1	8.49273e-11	1.57898	0.892	0.438	1.3979e-07	MA0406.1	TEC1
MA1114.1	4.37343e-09	1.07009	0.919	0.495	7.19867e-06	MA1114.1	PBX3
MA0782.2	2.61597e-07	0.635764	0.946	0.493	0.000430589	MA0782.2	PKNOX1
MA0515.1	2.36994e-06	0.6478	0.838	0.463	0.00390092	MA0515.1	Sox6
MA0775.1	5.51318e-06	0.687319	0.811	0.458	0.00907469	MA0775.1	MEIS3
MA0442.2	7.35793e-06	0.94606	0.784	0.471	0.0121112	MA0442.2	SOX10
MA0498.2	1.87725e-05	0.757605	0.757	0.468	0.0308996	MA0498.2	MEIS1
MA0867.2	3.48949e-05	0.4543	0.838	0.482	0.057437	MA0867.2	SOX4
MA0514.1	3.57696e-05	0.736155	0.865	0.486	0.0588768	MA0514.1	Sox3
MA1120.1	7.27495e-05	0.820377	0.811	0.472	0.119746	MA1120.1	SOX13
MA0149.1	0.000146388	0.60555	0.811	0.505	0.240955	MA0149.1	EWSR1-FLI1
MA0445.1	0.00127148	0.725604	0.73	0.495	1	MA0445.1	D
MA0258.2	0.00196957	0.512151	0.757	0.463	1	MA0258.2	ESR2
MA0513.1	0.00328414	0.756489	0.73	0.494	1	MA0513.1	SMAD2::SMAD3::SMAD4
MA1563.1	0.00952961	0.350439	0.676	0.503	1	MA1563.1	SOX18
MA0080.5	0.0116399	0.532934	0.649	0.508	1	MA0080.5	SPI1
MA1097.1	0.0141905	0.588396	0.649	0.495	1	MA1097.1	ARALYDRAFT_493022
MA0078.1	0.0168183	0.530599	0.703	0.484	1	MA0078.1	Sox17
MA0081.2	0.0173592	0.400581	0.703	0.508	1	MA0081.2	SPIB
MA1152.1	0.0187568	0.294825	0.703	0.484	1	MA1152.1	SOX15
MA0508.3	0.022691	0.556255	0.595	0.502	1	MA0508.3	PRDM1
MA0870.1	0.0242608	0.498387	0.676	0.478	1	MA0870.1	Sox1
MA0371.1	0.0308724	0.262459	0.622	0.479	1	MA0371.1	ROX1
MA0142.1	0.0612267	0.347257	0.622	0.497	1	MA0142.1	Pou5f1::Sox2
MA0764.2	0.0616689	0.575265	0.595	0.493	1	MA0764.2	ETV4
MA0370.1	0.0728206	0.397999	0.676	0.49	1	MA0370.1	RME1
MA1562.1	0.110373	0.363925	0.568	0.478	1	MA1562.1	SOX14
MA1685.1	0.112364	0.53479	0.541	0.495	1	MA1685.1	ARF10
MA0092.1	0.121781	0.5961	0.595	0.474	1	MA0092.1	Hand1::Tcf3
MA0327.1	0.12281	0.479937	0.622	0.482	1	MA0327.1	HMRA1
MA0331.1	0.165713	0.730584	0.568	0.48	1	MA0331.1	MCM1
MA1561.1	0.166145	0.382776	0.378	0.479	1	MA1561.1	SOX12
MA0425.1	0.19244	0.260119	0.595	0.497	1	MA0425.1	YGR067C
MA1031.1	0.210077	0.472197	0.541	0.51	1	MA1031.1	OJ1581_H09.2
MA0804.1	0.348453	0.266843	0.541	0.472	1	MA0804.1	TBX19
MA1381.1	0.60228	0.283721	0.486	0.524	1	MA1381.1	AT3G46070
MA0019.1	0.850824	0.411342	0.514	0.494	1	MA0019.1	Ddit3::Cebpa
MA1057.1	0.987782	1.02564	0.432	0.485	1	MA1057.1	SPL12

## Sheet: 4.HB13hpf.neural.r1&r2
	p_val	avg_log2FC	pct.1	pct.2	p_val_adj	motif	motif.name
MA1628.1	3.6248e-11	1.13393	0.966	0.434	5.96642e-08	MA1628.1	Zic1::Zic2
MA0456.1	4.81602e-10	0.561431	0.931	0.43	7.92717e-07	MA0456.1	opa
MA1537.1	2.23735e-09	0.851292	0.931	0.479	3.68268e-06	MA1537.1	NR2F1(var.2)
MA1574.1	7.90536e-09	0.484062	0.931	0.484	1.30122e-05	MA1574.1	THRB
MA1550.1	7.96103e-08	0.300023	0.966	0.485	0.000131039	MA1550.1	PPARD
MA0017.2	3.60703e-07	0.811286	0.862	0.486	0.000593717	MA0017.2	NR2F1
MA0736.1	3.68581e-07	1.46329	0.828	0.48	0.000606684	MA0736.1	GLIS2
MA0728.1	9.79907e-07	1.02261	0.897	0.472	0.00161293	MA0728.1	Nr2f6(var.2)
MA1148.1	2.35423e-06	1.28725	0.897	0.478	0.00387507	MA1148.1	PPARA::RXRA
MA0504.1	2.75088e-06	0.594965	0.897	0.484	0.00452795	MA0504.1	NR2C2
MA0065.2	2.96875e-06	0.985569	0.862	0.486	0.00488656	MA0065.2	Pparg::Rxra
MA1102.2	4.67524e-06	1.97034	0.931	0.494	0.00769545	MA1102.2	CTCFL
MA1494.1	5.92668e-06	0.701972	0.862	0.495	0.00975531	MA1494.1	HNF4A(var.2)
MA0016.1	1.38783e-05	0.74386	0.862	0.481	0.0228436	MA0016.1	usp
MA0139.1	1.58502e-05	1.05382	0.862	0.469	0.0260895	MA0139.1	CTCF
MA1535.1	1.86859e-05	0.352505	0.759	0.482	0.030757	MA1535.1	NR2C1
MA1284.1	2.45598e-05	0.975536	0.793	0.485	0.0404254	MA1284.1	TCP1
MA1430.1	3.16876e-05	1.23864	0.759	0.478	0.0521579	MA1430.1	TB1
MA1548.1	4.41733e-05	0.981294	0.793	0.473	0.0727092	MA1548.1	PLAGL2
MA0268.1	4.64624e-05	1.09291	0.862	0.489	0.0764771	MA0268.1	ADR1
MA0337.1	4.64624e-05	1.09291	0.862	0.489	0.0764771	MA0337.1	MIG1
MA0782.2	0.000129008	0.392361	0.897	0.498	0.212348	MA0782.2	PKNOX1
MA1114.1	0.000131188	0.727241	0.828	0.502	0.215935	MA1114.1	PBX3
MA0258.2	0.000158194	1.1585	0.793	0.465	0.260388	MA0258.2	ESR2
MA0160.1	0.000235802	1.13026	0.69	0.471	0.388131	MA0160.1	NR4A2
MA0857.1	0.000258831	0.673185	0.897	0.495	0.426035	MA0857.1	Rarb
MA0155.1	0.00045584	1.31873	0.793	0.495	0.750312	MA0155.1	INSM1
MA0163.1	0.000637515	0.7478	0.759	0.493	1	MA0163.1	PLAG1
MA0378.1	0.000800658	0.354352	0.862	0.498	1	MA0378.1	SFP1
MA1451.1	0.00106216	0.298207	0.793	0.476	1	MA1451.1	nhr-6
MA1410.1	0.00109215	0.395697	0.793	0.498	1	MA1410.1	StBRC1
MA1111.1	0.00113433	0.514437	0.724	0.468	1	MA1111.1	NR2F2
MA1630.1	0.00122568	0.610269	0.793	0.494	1	MA1630.1	Znf281
MA1433.1	0.00201268	0.542034	0.724	0.482	1	MA1433.1	msn-1
MA0774.1	0.00206801	0.288249	0.759	0.481	1	MA0774.1	MEIS2
MA1556.1	0.00236745	1.02199	0.621	0.474	1	MA1556.1	RXRG(var.2)
MA1036.1	0.00236861	0.703306	0.69	0.472	1	MA1036.1	MYB111
MA0088.2	0.00248603	0.793687	0.621	0.473	1	MA0088.2	ZNF143
MA0565.2	0.00262588	0.615186	0.69	0.51	1	MA0565.2	FUS3
MA1087.1	0.00272874	0.354332	0.759	0.467	1	MA1087.1	WRKY45
MA0112.3	0.00366608	0.744467	0.724	0.497	1	MA0112.3	ESR1
MA0809.2	0.00403305	0.344205	0.586	0.46	1	MA0809.2	TEAD4
MA0398.1	0.00416767	0.563653	0.69	0.497	1	MA0398.1	SUM1
MA1555.1	0.0065266	0.513814	0.655	0.498	1	MA1555.1	RXRB(var.2)
MA0364.1	0.00660412	0.394317	0.69	0.478	1	MA0364.1	REI1
MA1162.1	0.00783899	0.660362	0.655	0.471	1	MA1162.1	TCX2
MA1578.1	0.00813491	0.341548	0.724	0.49	1	MA1578.1	VEZF1
MA1288.1	0.00880607	0.607258	0.621	0.49	1	MA1288.1	At1g72010
MA0498.2	0.00988833	0.526274	0.69	0.472	1	MA0498.2	MEIS1
MA1531.1	0.0110594	0.985085	0.621	0.497	1	MA1531.1	NR1D1
MA0494.1	0.0122891	0.259208	0.759	0.48	1	MA0494.1	Nr1h3::Rxra
MA0729.1	0.013764	0.586431	0.69	0.486	1	MA0729.1	RARA
MA1283.1	0.0167526	0.463189	0.724	0.495	1	MA1283.1	TCP14
MA0643.1	0.0176658	0.68248	0.586	0.484	1	MA0643.1	Esrrg
MA1286.1	0.0191946	0.749733	0.655	0.479	1	MA1286.1	TCP24
MA1585.1	0.0201772	0.311987	0.724	0.488	1	MA1585.1	ZKSCAN1
MA0952.1	0.0203013	0.252194	0.724	0.497	1	MA0952.1	ATHB-51
MA0797.1	0.0224012	1.18697	0.69	0.481	1	MA0797.1	TGIF2
MA0009.2	0.0224687	0.786807	0.586	0.481	1	MA0009.2	TBXT
MA1018.1	0.0226616	0.526824	0.586	0.486	1	MA1018.1	GATA9
MA1063.1	0.0231869	0.326028	0.69	0.486	1	MA1063.1	TCP19
MA0144.2	0.0255572	0.523641	0.586	0.485	1	MA0144.2	STAT3
MA0459.1	0.025803	0.403921	0.621	0.48	1	MA0459.1	tll
MA1528.1	0.0278161	0.502118	0.621	0.489	1	MA1528.1	NFIX(var.2)
MA1552.1	0.0314561	0.505674	0.552	0.493	1	MA1552.1	RARB(var.3)
MA1038.1	0.033647	0.271723	0.69	0.484	1	MA1038.1	MYB3
MA0377.1	0.034557	0.377626	0.69	0.49	1	MA0377.1	SFL1
MA1095.1	0.0345998	0.550752	0.69	0.483	1	MA1095.1	ARALYDRAFT_495258
MA1098.1	0.0345998	0.550752	0.69	0.483	1	MA1098.1	ARALYDRAFT_484486
MA0152.1	0.0401667	0.361418	0.621	0.474	1	MA0152.1	NFATC2
MA1019.1	0.0480589	0.449883	0.655	0.486	1	MA1019.1	Glyma19g26560.1
MA1291.1	0.0502771	0.479179	0.724	0.498	1	MA1291.1	TCP7
MA1676.1	0.0506063	0.389701	0.621	0.492	1	MA1676.1	NAC062
MA0631.1	0.0533837	1.60783	0.483	0.479	1	MA0631.1	Six3
MA1035.1	0.0605905	0.377062	0.724	0.493	1	MA1035.1	TCP4
MA1290.1	0.060658	0.571446	0.586	0.495	1	MA1290.1	TCP17
MA1054.1	0.0624381	0.293209	0.621	0.493	1	MA1054.1	ARALYDRAFT_897773
MA0402.1	0.0625159	0.375708	0.69	0.466	1	MA0402.1	SWI5
MA1194.1	0.0663748	0.362836	0.655	0.501	1	MA1194.1	AT3G10580
MA1602.1	0.0703915	0.525705	0.552	0.498	1	MA1602.1	ZSCAN29
MA0731.1	0.0725211	0.899469	0.552	0.485	1	MA0731.1	BCL6B
MA0355.1	0.0801296	0.559716	0.69	0.494	1	MA0355.1	PHD1
MA0090.3	0.0809176	0.456347	0.483	0.452	1	MA0090.3	TEAD1
MA1077.1	0.082559	0.684899	0.586	0.473	1	MA1077.1	WRKY18
MA0676.1	0.0846578	0.597312	0.621	0.493	1	MA0676.1	Nr2e1
MA0532.1	0.0855107	1.06917	0.586	0.471	1	MA0532.1	Stat92E
MA1079.1	0.0872514	0.34245	0.586	0.486	1	MA1079.1	WRKY21
MA1309.1	0.090556	0.300074	0.483	0.473	1	MA1309.1	WRKY3
MA0625.1	0.0941303	0.368463	0.586	0.486	1	MA0625.1	NFATC3
MA1296.1	0.09443	0.502307	0.552	0.499	1	MA1296.1	WRKY46
MA1042.1	0.0946158	0.828888	0.517	0.491	1	MA1042.1	MYB59
MA0977.1	0.0983868	0.466856	0.621	0.495	1	MA0977.1	DOF2.5
MA0982.1	0.10026	0.309492	0.69	0.488	1	MA0982.1	DOF2.4
MA1040.1	0.10325	1.46836	0.517	0.483	1	MA1040.1	MYB46
MA0946.1	0.105546	0.407335	0.517	0.477	1	MA0946.1	ARR11
MA1089.1	0.120298	0.428961	0.483	0.465	1	MA1089.1	WRKY57
MA1062.2	0.137604	0.784142	0.517	0.491	1	MA1062.2	TCP15
MA0304.1	0.176747	0.512001	0.552	0.482	1	MA0304.1	GCR1
MA1428.1	0.183844	0.305618	0.586	0.497	1	MA1428.1	TCP8
MA1318.1	0.197556	0.317801	0.586	0.488	1	MA1318.1	WRKY27
MA1421.1	0.197815	0.425594	0.586	0.492	1	MA1421.1	TCF7L1
MA1285.1	0.218801	0.728989	0.69	0.48	1	MA1285.1	At2g45680
MA1343.1	0.226035	0.271752	0.483	0.47	1	MA1343.1	bZIP52
MA0646.1	0.250508	0.408341	0.552	0.48	1	MA0646.1	GCM1
MA0111.1	0.260354	0.635408	0.552	0.485	1	MA0111.1	Spz1
MA1525.1	0.261581	0.291348	0.552	0.501	1	MA1525.1	NFATC4
MA0606.1	0.262701	0.613634	0.552	0.478	1	MA0606.1	NFAT5
MA0739.1	0.264093	0.26818	0.586	0.47	1	MA0739.1	Hic1
MA1527.1	0.296063	0.398564	0.586	0.503	1	MA1527.1	NFIC(var.2)
MA1287.1	0.311598	0.484246	0.586	0.51	1	MA1287.1	TCP21
MA1312.1	0.31773	0.323447	0.586	0.464	1	MA1312.1	WRKY47
MA1017.1	0.332344	0.756477	0.517	0.486	1	MA1017.1	GATA8
MA0333.1	0.345149	0.404399	0.483	0.473	1	MA0333.1	MET31
MA1177.1	0.396932	0.271956	0.517	0.48	1	MA1177.1	MYB65
MA1532.1	0.488839	0.652744	0.448	0.514	1	MA1532.1	NR1D2
MA1065.2	0.516577	0.715132	0.448	0.489	1	MA1065.2	TCP20
MA1437.1	0.536222	2.41305	0.552	0.484	1	MA1437.1	wc-1
MA0270.1	0.538164	0.362164	0.483	0.519	1	MA0270.1	AFT2
MA0310.1	0.552581	0.560664	0.448	0.492	1	MA0310.1	HAC1
MA1508.1	0.552977	0.855268	0.483	0.51	1	MA1508.1	IKZF1
MA1013.1	0.592236	0.381537	0.586	0.483	1	MA1013.1	GATA10
MA1015.1	0.592236	0.381537	0.586	0.483	1	MA1015.1	GATA12
MA1117.1	0.602868	0.283754	0.517	0.505	1	MA1117.1	RELB
MA0484.2	0.833142	0.416332	0.414	0.495	1	MA0484.2	HNF4G
MA0114.4	0.90936	0.303165	0.448	0.492	1	MA0114.4	HNF4A

## Sheet: 5.HB13hpf.neural.r3
	p_val	avg_log2FC	pct.1	pct.2	p_val_adj	motif	motif.name
MA0732.1	5.86355e-37	3.43512	1	0.364	9.6514e-34	MA0732.1	EGR3
MA1627.1	1.23553e-31	3.70906	0.979	0.467	2.03368e-28	MA1627.1	Wt1
MA0472.2	1.64988e-30	1.84573	1	0.394	2.7157e-27	MA0472.2	EGR2
MA0733.1	6.68146e-28	2.87508	0.957	0.425	1.09977e-24	MA0733.1	EGR4
MA1601.1	1.73356e-24	3.22071	0.915	0.452	2.85344e-21	MA1601.1	ZNF75D
MA1114.1	1.04719e-23	2.56061	0.957	0.488	1.72368e-20	MA1114.1	PBX3
MA0162.4	2.52448e-20	1.98173	1	0.44	4.1553e-17	MA0162.4	EGR1
MA0782.2	3.25976e-20	2.44195	0.936	0.488	5.36556e-17	MA0782.2	PKNOX1
MA0734.2	3.95426e-20	3.54018	0.957	0.466	6.50871e-17	MA0734.2	GLI2
MA1512.1	1.87584e-17	2.44869	0.915	0.455	3.08763e-14	MA1512.1	KLF11
MA1514.1	2.69991e-16	2.46847	0.872	0.481	4.44405e-13	MA1514.1	KLF17
MA0359.1	6.00572e-15	2.26657	0.851	0.449	9.88541e-12	MA0359.1	RAP1
MA0442.2	2.46403e-14	2.32574	0.83	0.465	4.0558e-11	MA0442.2	SOX10
MA1491.1	4.78419e-13	2.60132	0.894	0.478	7.87478e-10	MA1491.1	GLI3
MA0747.1	2.40818e-12	2.39954	0.872	0.471	3.96387e-09	MA0747.1	SP8
MA0515.1	1.09617e-11	3.1727	0.83	0.46	1.8043e-08	MA0515.1	Sox6
MA0867.2	5.28005e-11	1.54112	0.83	0.478	8.69097e-08	MA0867.2	SOX4
MA1403.1	5.89373e-11	1.57193	0.851	0.534	9.70108e-08	MA1403.1	BPC5
MA1563.1	1.01733e-09	2.24594	0.766	0.496	1.67453e-06	MA1563.1	SOX18
MA0149.1	2.27086e-09	1.80259	0.809	0.502	3.73783e-06	MA0149.1	EWSR1-FLI1
MA1404.1	6.61289e-08	0.998898	0.83	0.518	0.000108848	MA1404.1	BPC1
MA0371.1	8.56613e-08	1.55163	0.745	0.471	0.000140999	MA0371.1	ROX1
MA0741.1	1.22843e-07	2.35638	0.766	0.507	0.000202199	MA0741.1	KLF16
MA0277.1	1.27891e-07	1.12391	0.809	0.48	0.000210508	MA0277.1	AZF1
MA0514.1	1.34204e-07	0.920183	0.787	0.486	0.000220899	MA0514.1	Sox3
MA0078.1	1.52518e-07	1.26357	0.745	0.48	0.000251045	MA0078.1	Sox17
MA0508.3	3.71229e-07	0.861807	0.809	0.489	0.000611043	MA0508.3	PRDM1
MA1402.1	5.35806e-07	1.07085	0.872	0.517	0.000881937	MA1402.1	BPC6
MA0445.1	2.24058e-06	0.867241	0.745	0.492	0.00368799	MA0445.1	D
MA1120.1	3.60854e-06	1.17734	0.766	0.471	0.00593966	MA1120.1	SOX13
MA1511.1	3.95107e-06	2.34282	0.745	0.489	0.00650345	MA1511.1	KLF10
MA0868.2	7.32682e-06	0.806982	0.745	0.472	0.01206	MA0868.2	SOX8
MA1688.1	7.97211e-06	0.828181	0.723	0.486	0.0131221	MA1688.1	ARF16
MA0543.1	1.25278e-05	1.39988	0.723	0.512	0.0206208	MA0543.1	eor-1
MA0205.2	1.33282e-05	0.928359	0.745	0.535	0.0219382	MA0205.2	Trl
MA0142.1	2.37025e-05	1.02189	0.766	0.488	0.0390143	MA0142.1	Pou5f1::Sox2
MA0080.5	4.03802e-05	0.873792	0.723	0.503	0.0664658	MA0080.5	SPI1
MA1685.1	4.34238e-05	0.992619	0.702	0.486	0.0714756	MA1685.1	ARF10
MA0370.1	4.82323e-05	0.610867	0.766	0.483	0.0793904	MA0370.1	RME1
MA1517.1	4.91726e-05	2.14314	0.702	0.494	0.0809381	MA1517.1	KLF6
MA0516.2	7.46342e-05	1.42456	0.745	0.519	0.122848	MA0516.2	SP2
MA1152.1	8.44173e-05	0.57616	0.766	0.478	0.138951	MA1152.1	SOX15
MA0143.4	0.00012021	0.571699	0.766	0.481	0.197865	MA0143.4	SOX2
MA0077.1	0.000151108	0.349828	0.787	0.487	0.248724	MA0077.1	SOX9
MA0537.1	0.000157352	0.738427	0.723	0.508	0.259002	MA0537.1	blmp-1
MA0528.2	0.000197238	0.596437	0.723	0.509	0.324653	MA0528.2	ZNF263
MA0471.2	0.000256279	0.590706	0.745	0.484	0.421835	MA0471.2	E2F6
MA0327.1	0.000307098	0.574988	0.723	0.475	0.505482	MA0327.1	HMRA1
MA0443.1	0.000312323	1.30224	0.66	0.463	0.514083	MA0443.1	btd
MA1095.1	0.000335473	0.71502	0.745	0.476	0.552189	MA1095.1	ARALYDRAFT_495258
MA1098.1	0.000335473	0.71502	0.745	0.476	0.552189	MA1098.1	ARALYDRAFT_484486
MA0597.1	0.000339559	0.92938	0.681	0.489	0.558915	MA0597.1	THAP1
MA0513.1	0.000341737	0.547744	0.723	0.492	0.5625	MA0513.1	SMAD2::SMAD3::SMAD4
MA1564.1	0.000414664	1.55153	0.745	0.491	0.682537	MA1564.1	SP9
MA1416.1	0.000462948	0.519125	0.745	0.536	0.762013	MA1416.1	RAMOSA1
MA1370.1	0.000513118	0.489049	0.681	0.498	0.844592	MA1370.1	IDD5
MA1645.1	0.000528162	0.273607	0.723	0.501	0.869354	MA1645.1	NKX2-2
MA0753.2	0.00133423	0.575489	0.66	0.514	1	MA0753.2	ZNF740
MA0081.2	0.00154224	0.813701	0.723	0.505	1	MA0081.2	SPIB
MA0870.1	0.00198683	0.599185	0.617	0.478	1	MA0870.1	Sox1
MA0564.1	0.00259083	0.371741	0.681	0.489	1	MA0564.1	ABI3
MA1274.1	0.00261649	0.437459	0.681	0.494	1	MA1274.1	OBP3
MA0764.2	0.00286343	0.63064	0.681	0.487	1	MA0764.2	ETV4
MA1508.1	0.00335428	0.71441	0.617	0.504	1	MA1508.1	IKZF1
MA1565.1	0.0034893	0.449942	0.723	0.488	1	MA1565.1	TBX18
MA1268.1	0.00351861	0.648477	0.681	0.501	1	MA1268.1	AT1G69570
MA0493.1	0.00370315	1.37536	0.638	0.52	1	MA0493.1	Klf1
MA0322.1	0.00414733	0.588492	0.66	0.489	1	MA0322.1	INO4
MA1562.1	0.00435314	0.473647	0.681	0.471	1	MA1562.1	SOX14
MA1600.1	0.00451444	0.420667	0.66	0.491	1	MA1600.1	ZNF684
MA0120.1	0.00491932	0.707249	0.596	0.474	1	MA0120.1	id1
MA0039.4	0.00572035	0.861872	0.702	0.504	1	MA0039.4	KLF4
MA0268.1	0.00581576	0.570063	0.638	0.493	1	MA0268.1	ADR1
MA0337.1	0.00581576	0.570063	0.638	0.493	1	MA0337.1	MIG1
MA0746.2	0.00608842	1.74337	0.617	0.501	1	MA0746.2	SP3
MA0739.1	0.00660598	0.674352	0.702	0.462	1	MA0739.1	Hic1
MA1372.1	0.00694577	0.734205	0.617	0.489	1	MA1372.1	STZ
MA1405.1	0.00709694	0.545376	0.66	0.481	1	MA1405.1	SIZF2
MA0563.1	0.00723361	0.646776	0.66	0.494	1	MA0563.1	2021-09-03
MA1428.1	0.00750344	0.715355	0.596	0.495	1	MA1428.1	TCP8
MA0576.1	0.00759194	0.546705	0.638	0.48	1	MA0576.1	RAX3
MA1270.1	0.00832038	0.622816	0.638	0.484	1	MA1270.1	AT3G45610
MA1588.1	0.00857475	0.548696	0.66	0.493	1	MA1588.1	ZNF136
MA0050.2	0.00931697	0.36734	0.574	0.499	1	MA0050.2	IRF1
MA1116.1	0.0117531	0.327427	0.638	0.495	1	MA1116.1	RBPJ
MA0917.1	0.0126931	0.255375	0.66	0.475	1	MA0917.1	gcm2
MA1284.1	0.0154555	0.54345	0.617	0.488	1	MA1284.1	TCP1
MA0742.1	0.0159275	0.562631	0.319	0.481	1	MA0742.1	Klf12
MA1066.1	0.0164213	0.355312	0.702	0.504	1	MA1066.1	TCP23
MA1160.1	0.0167577	0.514373	0.681	0.489	1	MA1160.1	AT1G14580
MA1159.1	0.0169908	0.361214	0.638	0.468	1	MA1159.1	SGR5
MA1690.1	0.0187589	0.554763	0.66	0.501	1	MA1690.1	ARF25
MA1277.1	0.0192068	0.422763	0.617	0.488	1	MA1277.1	Adof1
MA0436.1	0.0277394	0.740658	0.553	0.484	1	MA0436.1	YPR022C
MA0384.1	0.0287033	0.933419	0.298	0.478	1	MA0384.1	SNT2
MA1278.1	0.0348467	0.511469	0.596	0.481	1	MA1278.1	OBP1
MA0766.2	0.045496	2.85348	0.319	0.473	1	MA0766.2	GATA5
MA0045.1	0.0473344	0.508328	0.596	0.488	1	MA0045.1	HMG-I/Y
MA1281.1	0.0535556	0.328711	0.617	0.48	1	MA1281.1	AT5G02460
MA0368.1	0.0592651	0.362886	0.553	0.488	1	MA0368.1	RIM101
MA0270.1	0.0695946	0.385339	0.553	0.516	1	MA0270.1	AFT2
MA0736.1	0.0727062	0.278732	0.574	0.486	1	MA0736.1	GLIS2
MA1623.1	0.0790769	0.32519	0.511	0.481	1	MA1623.1	Stat2
MA1064.1	0.0795719	0.367218	0.574	0.481	1	MA1064.1	TCP2
MA0738.1	0.0854145	0.499434	0.638	0.473	1	MA0738.1	HIC2
MA1515.1	0.0861833	1.27435	0.532	0.507	1	MA1515.1	KLF2
MA1279.1	0.0891657	0.469046	0.596	0.485	1	MA1279.1	COG1
MA1273.1	0.091484	0.363617	0.574	0.48	1	MA1273.1	dof4.2
MA0305.1	0.10553	0.570729	0.553	0.489	1	MA0305.1	GCR2
MA0425.1	0.115695	0.351469	0.553	0.498	1	MA0425.1	YGR067C
MA0940.1	0.122816	0.42938	0.574	0.499	1	MA0940.1	AP1
MA0836.2	0.134241	0.375213	0.553	0.487	1	MA0836.2	CEBPD
MA1381.1	0.141913	0.42432	0.553	0.52	1	MA1381.1	AT3G46070
MA1291.1	0.1438	0.433716	0.532	0.504	1	MA1291.1	TCP7
MA1035.1	0.156043	0.344875	0.638	0.493	1	MA1035.1	TCP4
MA1286.1	0.193902	0.606422	0.532	0.482	1	MA1286.1	TCP24
MA1267.1	0.193945	0.295795	0.553	0.499	1	MA1267.1	AT5G66940
MA0740.1	0.2099	0.97814	0.511	0.481	1	MA0740.1	KLF14
MA1357.1	0.241658	0.377598	0.511	0.484	1	MA1357.1	bHLH80
MA1057.1	0.250657	0.329809	0.574	0.478	1	MA1057.1	SPL12
MA0737.1	0.256306	0.742551	0.489	0.466	1	MA0737.1	GLIS3
MA0338.1	0.265244	0.489931	0.617	0.497	1	MA0338.1	MIG2
MA0339.1	0.265244	0.489931	0.617	0.497	1	MA0339.1	MIG3
MA1283.1	0.281215	0.472997	0.553	0.499	1	MA1283.1	TCP14
MA0377.1	0.288031	0.495085	0.511	0.495	1	MA0377.1	SFL1
MA0106.3	0.322257	1.26389	0.532	0.47	1	MA0106.3	TP53
MA0319.1	0.322556	0.499116	0.553	0.495	1	MA0319.1	HSF1
MA1050.1	0.326536	0.389968	0.574	0.514	1	MA1050.1	OsI_08196
MA0973.1	0.359441	0.348521	0.596	0.506	1	MA0973.1	CDF2
MA0554.1	0.35984	0.477234	0.553	0.477	1	MA0554.1	SOC1
MA0144.2	0.379768	0.329777	0.553	0.485	1	MA0144.2	STAT3
MA0079.4	0.411029	2.56212	0.383	0.492	1	MA0079.4	SP1
MA0575.1	0.449579	0.316517	0.596	0.473	1	MA0575.1	F3A4.140
MA1102.2	0.499043	0.38172	0.511	0.507	1	MA1102.2	CTCFL
MA0657.1	0.515442	2.33498	0.468	0.471	1	MA0657.1	KLF13
MA0150.2	0.519144	1.30358	0.511	0.468	1	MA0150.2	Nfe2l2
MA0288.1	0.553089	0.273659	0.638	0.496	1	MA0288.1	CUP9
MA0317.1	0.58683	0.294993	0.426	0.472	1	MA0317.1	HCM1
MA0614.1	0.58683	0.294993	0.426	0.472	1	MA0614.1	Foxj2
MA1012.1	0.597792	0.403672	0.489	0.481	1	MA1012.1	AGL27
MA1058.1	0.629227	0.507542	0.404	0.491	1	MA1058.1	SPL4
MA0518.1	0.710063	0.26025	0.511	0.488	1	MA0518.1	Stat4
MA1168.1	0.776851	0.257224	0.511	0.519	1	MA1168.1	MYR2
MA1377.1	0.812179	0.277884	0.511	0.464	1	MA1377.1	PLT1
MA0685.1	0.854771	3.19429	0.383	0.508	1	MA0685.1	SP4
MA1701.1	0.910199	0.317553	0.426	0.468	1	MA1701.1	elt-2
MA1122.1	0.940991	0.363579	0.447	0.475	1	MA1122.1	TFDP1

## Sheet: 6.HB13hpf.neural.r4
	p_val	avg_log2FC	pct.1	pct.2	p_val_adj	motif	motif.name
MA0070.1	2.80797e-11	1.36852	0.974	0.466	4.62192e-08	MA0070.1	PBX1
MA0514.1	2.54276e-06	1.42413	0.816	0.488	0.00418538	MA0514.1	Sox3
MA0078.1	6.10543e-06	1.59654	0.789	0.48	0.0100495	MA0078.1	Sox17
MA0515.1	1.00703e-05	1.68034	0.737	0.467	0.0165757	MA0515.1	Sox6
MA0077.1	4.8315e-05	1.00363	0.763	0.491	0.0795265	MA0077.1	SOX9
MA0867.2	0.000128066	0.701948	0.737	0.486	0.210797	MA0867.2	SOX4
MA1690.1	0.000177699	0.948236	0.763	0.498	0.292493	MA1690.1	ARF25
MA1685.1	0.000189599	0.954815	0.737	0.487	0.31208	MA1685.1	ARF10
MA0442.2	0.000191429	0.727645	0.763	0.471	0.315092	MA0442.2	SOX10
MA0371.1	0.00126457	0.663149	0.737	0.474	1	MA0371.1	ROX1
MA0868.2	0.00163418	0.576472	0.711	0.476	1	MA0868.2	SOX8
MA0445.1	0.00193499	0.643304	0.658	0.498	1	MA0445.1	D
MA1563.1	0.00248995	0.79849	0.763	0.499	1	MA1563.1	SOX18
MA1629.1	0.00289174	0.902521	0.579	0.436	1	MA1629.1	Zic2
MA1321.1	0.00350901	0.420966	0.684	0.488	1	MA1321.1	SPL13
MA0343.1	0.00379465	0.452638	0.789	0.498	1	MA0343.1	NDT80
MA0143.4	0.00405511	0.443138	0.684	0.487	1	MA0143.4	SOX2
MA1616.1	0.0052489	0.285014	0.711	0.468	1	MA1616.1	Prdm15
MA1152.1	0.00617551	0.323437	0.711	0.484	1	MA1152.1	SOX15
MA0045.1	0.00723834	0.599897	0.684	0.486	1	MA0045.1	HMG-I/Y
MA1012.1	0.0073902	0.480988	0.658	0.474	1	MA1012.1	AGL27
MA1562.1	0.00739424	0.91226	0.632	0.475	1	MA1562.1	SOX14
MA1022.1	0.00754311	0.426184	0.737	0.479	1	MA1022.1	PHYPADRAFT_38837
MA1120.1	0.00833589	0.475993	0.658	0.478	1	MA1120.1	SOX13
MA0610.1	0.010393	0.861538	0.684	0.49	1	MA0610.1	DMRT3
MA1374.1	0.0108847	0.269989	0.684	0.493	1	MA1374.1	IDD7
MA1628.1	0.0122929	2.22335	0.5	0.448	1	MA1628.1	Zic1::Zic2
MA0768.1	0.0141304	0.391548	0.684	0.482	1	MA0768.1	LEF1
MA1588.1	0.0146693	0.385004	0.658	0.495	1	MA1588.1	ZNF136
MA0142.1	0.0161966	0.648592	0.632	0.497	1	MA0142.1	Pou5f1::Sox2
MA0870.1	0.0174284	0.437568	0.711	0.476	1	MA0870.1	Sox1
MA1525.1	0.019789	0.265559	0.684	0.495	1	MA1525.1	NFATC4
MA1573.1	0.0219417	0.477419	0.605	0.475	1	MA1573.1	THAP11
MA1373.1	0.0223335	0.393214	0.632	0.467	1	MA1373.1	IDD2
MA1322.1	0.0234612	0.670992	0.658	0.488	1	MA1322.1	SPL9
MA0071.1	0.0249778	0.422345	0.263	0.491	1	MA0071.1	RORA
MA1064.1	0.0265543	0.699041	0.684	0.477	1	MA1064.1	TCP2
MA0087.1	0.0323586	0.386145	0.632	0.479	1	MA0087.1	Sox5
MA0554.1	0.0324415	0.289396	0.658	0.474	1	MA0554.1	SOC1
MA1603.1	0.0327197	0.720397	0.579	0.496	1	MA1603.1	Dmrt1
MA0739.1	0.0352123	0.514383	0.526	0.471	1	MA0739.1	Hic1
MA1695.1	0.0372171	0.679613	0.579	0.491	1	MA1695.1	ARF36
MA0738.1	0.0376109	0.311163	0.605	0.476	1	MA0738.1	HIC2
MA0393.1	0.0399906	0.399251	0.605	0.465	1	MA0393.1	STE12
MA0277.1	0.0406204	0.535207	0.605	0.491	1	MA0277.1	AZF1
MA0804.1	0.0411712	0.318738	0.605	0.469	1	MA0804.1	TBX19
MA0713.1	0.059088	0.532463	0.289	0.481	1	MA0713.1	PHOX2A
MA0582.1	0.0602791	0.408202	0.658	0.49	1	MA0582.1	RAV1
MA1157.1	0.0665507	0.484372	0.605	0.476	1	MA1157.1	NUC
MA0149.1	0.0741736	0.460256	0.579	0.514	1	MA0149.1	EWSR1-FLI1
MA1478.1	0.0748473	0.695927	0.658	0.477	1	MA1478.1	DMRTA2
MA1479.1	0.0755994	0.397336	0.632	0.477	1	MA1479.1	DMRTC2
MA0513.1	0.078106	0.254358	0.632	0.498	1	MA0513.1	SMAD2::SMAD3::SMAD4
MA1597.1	0.0837403	0.451141	0.579	0.481	1	MA1597.1	ZNF528
MA1600.1	0.087334	0.542275	0.632	0.493	1	MA1600.1	ZNF684
MA1065.2	0.0932872	0.282585	0.632	0.481	1	MA1065.2	TCP20
MA0624.1	0.0957556	0.314358	0.579	0.491	1	MA0624.1	NFATC1
MA0381.1	0.107765	0.685345	0.658	0.459	1	MA0381.1	SKN7
MA0333.1	0.122316	0.253135	0.553	0.47	1	MA0333.1	MET31
MA0082.1	0.123084	0.409898	0.605	0.485	1	MA0082.1	squamosa
MA0287.1	0.141351	0.576301	0.447	0.479	1	MA0287.1	CUP2
MA0300.1	0.148718	0.477689	0.342	0.491	1	MA0300.1	GAT1
MA1056.1	0.150431	0.529665	0.579	0.497	1	MA1056.1	SPL11
MA0081.2	0.151061	0.284294	0.579	0.513	1	MA0081.2	SPIB
MA0653.1	0.167348	0.391797	0.605	0.473	1	MA0653.1	IRF9
MA0946.1	0.172959	0.299331	0.632	0.471	1	MA0946.1	ARR11
MA0523.1	0.177626	0.794803	0.5	0.495	1	MA0523.1	TCF7L2
MA0486.2	0.178971	0.366137	0.5	0.465	1	MA0486.2	HSF1
MA1698.1	0.186348	0.281833	0.605	0.48	1	MA1698.1	ARF7
MA0362.1	0.219881	0.570996	0.553	0.49	1	MA0362.1	RDS2
MA1561.1	0.220293	0.527774	0.474	0.475	1	MA1561.1	SOX12
MA1602.1	0.22327	0.645465	0.579	0.497	1	MA1602.1	ZSCAN29
MA1014.1	0.22346	1.0098	0.447	0.481	1	MA1014.1	GATA11
MA0302.1	0.223725	0.587523	0.553	0.497	1	MA0302.1	GAT4
MA1013.1	0.224995	0.444467	0.474	0.487	1	MA1013.1	GATA10
MA1015.1	0.224995	0.444467	0.474	0.487	1	MA1015.1	GATA12
MA0770.1	0.229973	0.488158	0.5	0.443	1	MA0770.1	HSF2
MA1058.1	0.241273	0.512485	0.526	0.485	1	MA1058.1	SPL4
MA1018.1	0.251794	0.374472	0.579	0.486	1	MA1018.1	GATA9
MA1405.1	0.284085	0.524919	0.526	0.488	1	MA1405.1	SIZF2
MA0370.1	0.284761	0.542257	0.553	0.495	1	MA0370.1	RME1
MA0024.3	0.29437	0.261161	0.553	0.475	1	MA0024.3	E2F1
MA1384.1	0.303878	0.272252	0.553	0.493	1	MA1384.1	PHL7
MA0469.3	0.315986	0.973988	0.553	0.491	1	MA0469.3	E2F3
MA0460.1	0.336521	0.416517	0.5	0.498	1	MA0460.1	ttk
MA0596.1	0.342305	0.38266	0.632	0.507	1	MA0596.1	SREBF2
MA1280.1	0.344896	0.415789	0.474	0.495	1	MA1280.1	OBP4
MA0978.1	0.353493	0.313965	0.342	0.504	1	MA0978.1	DREB1E
MA0001.2	0.365342	0.551993	0.526	0.485	1	MA0001.2	AGL3
MA0338.1	0.372704	0.326431	0.579	0.5	1	MA0338.1	MIG2
MA0339.1	0.372704	0.326431	0.579	0.5	1	MA0339.1	MIG3
MA0864.2	0.382381	0.384292	0.526	0.492	1	MA0864.2	E2F2
MA1066.1	0.467445	0.328045	0.579	0.511	1	MA1066.1	TCP23
MA1070.1	0.475262	0.524918	0.526	0.479	1	MA1070.1	TGA7
MA0780.1	0.494136	0.293034	0.526	0.522	1	MA0780.1	PAX3
MA0266.1	0.549362	0.410775	0.553	0.488	1	MA0266.1	ABF2
MA1293.1	0.572719	0.276368	0.395	0.498	1	MA1293.1	MYB57
MA1408.1	0.581382	1.30484	0.447	0.501	1	MA1408.1	FaEOBII
MA0464.2	0.625308	0.475045	0.474	0.507	1	MA0464.2	BHLHE40
MA0750.2	0.63834	0.440553	0.447	0.475	1	MA0750.2	ZBTB7A
MA1325.1	0.66963	0.667728	0.474	0.48	1	MA1325.1	GATA14
MA1664.1	0.682446	0.254653	0.5	0.481	1	MA1664.1	HSFA6B
MA0517.1	0.809395	0.301725	0.5	0.5	1	MA0517.1	STAT1::STAT2
MA0809.2	0.815263	2.22964	0.421	0.466	1	MA0809.2	TEAD4
MA1594.1	0.824848	0.321519	0.5	0.474	1	MA1594.1	ZNF382
MA0265.1	0.825666	0.36055	0.5	0.49	1	MA0265.1	ABF1
MA1523.1	0.867679	0.565504	0.474	0.485	1	MA1523.1	MSANTD3
MA0002.2	0.873075	0.756423	0.526	0.481	1	MA0002.2	RUNX1
MA1666.1	0.890155	0.292456	0.474	0.469	1	MA1666.1	HSFB2B
MA0871.2	0.902454	0.250164	0.526	0.487	1	MA0871.2	TFEC
MA1534.1	0.928045	0.690415	0.447	0.505	1	MA1534.1	NR1I3
MA1389.1	0.963775	0.283388	0.5	0.507	1	MA1389.1	PHL1
MA1372.1	0.969231	0.375741	0.5	0.496	1	MA1372.1	STZ
MA0407.1	0.986413	0.288082	0.526	0.508	1	MA0407.1	THI2

## Sheet: 7.HB13hpf.neural.r5
	p_val	avg_log2FC	pct.1	pct.2	p_val_adj	motif	motif.name
MA0732.1	2.08922e-42	5.10782	1	0.366	3.43886e-39	MA0732.1	EGR3
MA0733.1	1.28392e-40	4.97508	1	0.425	2.11334e-37	MA0733.1	EGR4
MA0472.2	9.671e-38	6.16512	1	0.396	1.59185e-34	MA0472.2	EGR2
MA1627.1	1.81237e-28	3.02197	0.977	0.469	2.98317e-25	MA1627.1	Wt1
MA1512.1	5.16285e-27	3.39482	0.977	0.454	8.49804e-24	MA1512.1	KLF11
MA1521.1	4.10253e-22	2.7098	0.886	0.449	6.75276e-19	MA1521.1	MAFA
MA0734.2	8.43243e-21	2.12037	0.977	0.467	1.38798e-17	MA0734.2	GLI2
MA0162.4	1.2447e-20	1.474	0.977	0.443	2.04877e-17	MA0162.4	EGR1
MA0747.1	1.20247e-18	2.33408	0.909	0.47	1.97927e-15	MA0747.1	SP8
MA1601.1	6.5011e-18	2.08902	0.932	0.453	1.07008e-14	MA1601.1	ZNF75D
MA1520.1	1.72821e-17	2.42719	0.886	0.458	2.84463e-14	MA1520.1	MAF
MA0842.2	1.41175e-16	2.47106	0.841	0.433	2.32374e-13	MA0842.2	NRL
MA0117.2	2.15678e-15	2.09518	0.886	0.434	3.55006e-12	MA0117.2	Mafb
MA0359.1	2.17434e-15	2.13177	0.886	0.448	3.57897e-12	MA0359.1	RAP1
MA1514.1	4.05703e-15	1.47235	0.932	0.479	6.67788e-12	MA1514.1	KLF17
MA1491.1	1.67352e-14	1.6221	0.932	0.478	2.75461e-11	MA1491.1	GLI3
MA0495.3	6.33083e-14	1.6436	0.886	0.444	1.04205e-10	MA0495.3	MAFF
MA0659.2	5.72699e-13	0.988285	0.886	0.46	9.42662e-10	MA0659.2	MAFG
MA0741.1	8.36237e-13	1.72435	0.909	0.501	1.37645e-09	MA0741.1	KLF16
MA0591.1	4.12748e-12	2.64608	0.932	0.46	6.79383e-09	MA0591.1	Bach1::Mafk
MA1511.1	4.93654e-12	1.23264	0.955	0.48	8.12555e-09	MA1511.1	KLF10
MA0443.1	6.60698e-11	0.281853	0.955	0.449	1.08751e-07	MA0443.1	btd
MA1517.1	3.51467e-10	1.57228	0.909	0.485	5.78515e-07	MA1517.1	KLF6
MA0496.3	1.27487e-09	1.18475	0.841	0.401	2.09843e-06	MA0496.3	MAFK
MA0746.2	1.17126e-08	0.867495	0.818	0.491	1.92789e-05	MA0746.2	SP3
MA1564.1	2.1145e-08	1.115	0.818	0.488	3.48046e-05	MA1564.1	SP9
MA0150.2	2.19294e-08	1.5423	0.773	0.456	3.60959e-05	MA0150.2	Nfe2l2
MA0493.1	2.87591e-07	0.627871	0.841	0.511	0.000473375	MA0493.1	Klf1
MA0501.1	2.22656e-05	1.37789	0.659	0.443	0.0366492	MA0501.1	MAF::NFE2
MA0128.1	3.2002e-05	0.639176	0.795	0.508	0.0526754	MA0128.1	EmBP-1
MA0597.1	6.20316e-05	0.742527	0.727	0.488	0.102104	MA0597.1	THAP1
MA0089.2	7.04798e-05	1.24301	0.727	0.446	0.11601	MA0089.2	NFE2L1
MA0039.4	0.000100891	0.499831	0.705	0.504	0.166066	MA0039.4	KLF4
MA0767.1	0.000305315	0.577461	0.795	0.48	0.502549	MA0767.1	GCM2
MA1372.1	0.000570014	0.667688	0.727	0.485	0.938244	MA1372.1	STZ
MA0516.2	0.000774313	0.558933	0.659	0.524	1	MA0516.2	SP2
MA1623.1	0.000907686	0.686503	0.682	0.472	1	MA1623.1	Stat2
MA0332.1	0.00110604	0.80446	0.682	0.462	1	MA0332.1	MET28
MA0473.3	0.0011419	0.294956	0.727	0.488	1	MA0473.3	ELF1
MA0081.2	0.00114291	0.443831	0.705	0.507	1	MA0081.2	SPIB
MA0565.2	0.00134526	0.567172	0.682	0.508	1	MA0565.2	FUS3
MA1128.1	0.00141303	1.08468	0.659	0.426	1	MA1128.1	FOSL1::JUN
MA1142.1	0.00144585	1.86687	0.636	0.412	1	MA1142.1	FOSL1::JUND
MA0272.1	0.00156769	0.330936	0.705	0.462	1	MA0272.1	ARG81
MA0738.1	0.00199781	0.625221	0.614	0.475	1	MA0738.1	HIC2
MA0740.1	0.00212017	0.44217	0.682	0.472	1	MA0740.1	KLF14
MA0149.1	0.00216651	0.288656	0.818	0.502	1	MA0149.1	EWSR1-FLI1
MA1134.1	0.00269353	1.7795	0.614	0.413	1	MA1134.1	FOS::JUNB
MA1141.1	0.00286027	1.15166	0.659	0.412	1	MA1141.1	FOS::JUND
MA0478.1	0.00391231	1.52065	0.682	0.415	1	MA0478.1	FOSL2
MA1622.1	0.00419517	0.743607	0.659	0.429	1	MA1622.1	Smad2::Smad3
MA0735.1	0.00513879	0.279855	0.705	0.477	1	MA0735.1	GLIS1
MA0764.2	0.00522949	0.276379	0.682	0.488	1	MA0764.2	ETV4
MA0268.1	0.00593208	0.682565	0.659	0.492	1	MA0268.1	ADR1
MA0337.1	0.00593208	0.682565	0.659	0.492	1	MA0337.1	MIG1
MA0270.1	0.00690676	0.395548	0.727	0.508	1	MA0270.1	AFT2
MA0303.1	0.00906439	0.399303	0.614	0.419	1	MA0303.1	GCN4
MA1268.1	0.0132628	0.389835	0.727	0.499	1	MA1268.1	AT1G69570
MA1389.1	0.0147896	0.466927	0.614	0.501	1	MA1389.1	PHL1
MA0624.1	0.0159274	0.503485	0.682	0.486	1	MA0624.1	NFATC1
MA0973.1	0.0160132	0.711156	0.682	0.502	1	MA0973.1	CDF2
MA1636.1	0.0210822	0.400876	0.636	0.492	1	MA1636.1	CEBPG(var.2)
MA1384.1	0.0228246	0.305808	0.705	0.486	1	MA1384.1	PHL7
MA0581.1	0.0236134	0.764107	0.591	0.474	1	MA0581.1	LEC2
MA0045.1	0.0261155	0.410353	0.614	0.488	1	MA0045.1	HMG-I/Y
MA1381.1	0.0285786	0.452163	0.682	0.514	1	MA1381.1	AT3G46070
MA0088.2	0.0461942	0.319048	0.636	0.47	1	MA0088.2	ZNF143
MA0022.1	0.0483095	0.400344	0.591	0.493	1	MA0022.1	dl
MA0625.1	0.0567441	0.413001	0.568	0.486	1	MA0625.1	NFATC3
MA1115.1	0.0632864	0.442679	0.614	0.478	1	MA1115.1	POU5F1
MA0160.1	0.0649439	0.272605	0.545	0.475	1	MA0160.1	NR4A2
MA0287.1	0.0928814	0.452713	0.545	0.475	1	MA0287.1	CUP2
MA0564.1	0.159171	0.288354	0.568	0.496	1	MA0564.1	ABI3
MA0977.1	0.160283	0.267218	0.614	0.493	1	MA0977.1	DOF2.5
MA0787.1	0.177465	0.967427	0.568	0.482	1	MA0787.1	POU3F2
MA1676.1	0.19266	0.378508	0.455	0.498	1	MA1676.1	NAC062
MA1536.1	0.196317	0.351276	0.568	0.479	1	MA1536.1	NR2C2(var.2)
MA0507.1	0.199164	0.441734	0.591	0.491	1	MA0507.1	POU2F2
MA0530.1	0.231488	0.299784	0.568	0.506	1	MA0530.1	cnc::maf-S
MA1413.1	0.231785	0.32035	0.523	0.481	1	MA1413.1	UIF1
MA1200.1	0.26931	0.621738	0.5	0.494	1	MA1200.1	AGL25
MA0322.1	0.287917	0.314026	0.545	0.496	1	MA0322.1	INO4
MA1585.1	0.304478	0.379898	0.545	0.492	1	MA1585.1	ZKSCAN1
MA0772.1	0.358417	0.282961	0.432	0.487	1	MA0772.1	IRF7
MA0083.3	0.400816	0.29402	0.591	0.503	1	MA0083.3	SRF
MA1673.1	0.437918	0.845257	0.5	0.488	1	MA1673.1	LBD18
MA1234.1	0.549845	0.510861	0.545	0.478	1	MA1234.1	ERF017
MA1164.1	0.577675	0.343159	0.409	0.489	1	MA1164.1	HHO5
MA1421.1	0.648223	0.560764	0.477	0.496	1	MA1421.1	TCF7L1
MA0785.1	0.659969	0.257802	0.432	0.483	1	MA0785.1	POU2F1
MA0770.1	0.697831	0.403537	0.5	0.443	1	MA0770.1	HSF2
MA1159.1	0.761157	0.350713	0.5	0.476	1	MA1159.1	SGR5
MA0627.2	0.787333	0.660059	0.455	0.483	1	MA0627.2	POU2F3
MA1091.1	0.810988	0.463737	0.364	0.466	1	MA1091.1	WRKY62
MA0792.1	0.886501	0.369602	0.364	0.489	1	MA0792.1	POU5F1B
MA0197.2	0.937116	0.392849	0.477	0.492	1	MA0197.2	nub

## Sheet: 8.HB13hpf.neural.r6
	p_val	avg_log2FC	pct.1	pct.2	p_val_adj	motif	motif.name
MA0117.2	6.39259e-25	3.46442	0.947	0.434	1.05222e-21	MA0117.2	Mafb
MA0495.3	9.35754e-25	3.65509	0.947	0.444	1.54025e-21	MA0495.3	MAFF
MA1521.1	2.9114e-24	3.76193	0.947	0.45	4.79216e-21	MA1521.1	MAFA
MA0659.2	6.30241e-24	4.4841	0.947	0.461	1.03738e-20	MA0659.2	MAFG
MA0842.2	4.32403e-22	3.2404	0.974	0.43	7.11736e-19	MA0842.2	NRL
MA1520.1	2.04137e-18	2.64977	0.895	0.461	3.36009e-15	MA1520.1	MAF
MA0153.2	4.29843e-17	1.1592	0.974	0.382	7.07522e-14	MA0153.2	HNF1B
MA1210.1	1.68955e-15	2.43974	0.947	0.422	2.78101e-12	MA1210.1	HAT22
MA0046.2	4.0881e-15	0.759025	0.974	0.401	6.72901e-12	MA0046.2	HNF1A
MA1024.1	7.18564e-13	1.57526	0.947	0.456	1.18276e-09	MA1024.1	HAT1
MA1406.1	1.04499e-11	1.81588	0.895	0.442	1.72006e-08	MA1406.1	ATHB4
MA0591.1	1.1772e-10	2.6552	0.868	0.466	1.93767e-07	MA0591.1	Bach1::Mafk
MA1504.1	3.49964e-10	1.23107	0.921	0.442	5.76041e-07	MA1504.1	HOXC4
MA0496.3	6.9183e-10	2.139	0.842	0.404	1.13875e-06	MA0496.3	MAFK
MA1496.1	1.8205e-08	0.852359	1	0.45	2.99654e-05	MA1496.1	HOXA4
MA1211.1	2.31417e-08	1.18366	0.868	0.446	3.80912e-05	MA1211.1	ATHB18
MA0110.3	1.3929e-07	0.494193	0.895	0.429	0.000229272	MA0110.3	ATHB-5
MA0150.2	1.41839e-07	1.75913	0.842	0.455	0.000233466	MA0150.2	Nfe2l2
MA0530.1	2.75812e-06	0.797395	0.868	0.493	0.00453987	MA0530.1	cnc::maf-S
MA0677.1	4.64378e-06	0.31673	0.868	0.487	0.00764366	MA0677.1	Nr2f6
MA0070.1	5.76783e-06	0.593455	0.816	0.473	0.00949385	MA0070.1	PBX1
MA1198.1	6.58779e-06	0.425957	0.816	0.446	0.0108435	MA1198.1	HAT2
MA0501.1	7.03546e-06	0.841025	0.789	0.439	0.0115804	MA0501.1	MAF::NFE2
MA1574.1	7.87292e-06	0.395884	0.868	0.482	0.0129588	MA1574.1	THRB
MA1148.1	1.39875e-05	1.06812	0.789	0.478	0.0230235	MA1148.1	PPARA::RXRA
MA0089.2	2.10794e-05	0.317751	0.842	0.443	0.0346966	MA0089.2	NFE2L1
MA1026.2	2.89347e-05	0.369034	0.868	0.467	0.0476266	MA1026.2	ATHB15
MA0017.2	7.26162e-05	0.893258	0.895	0.481	0.119526	MA0017.2	NR2F1
MA0512.2	0.000237812	0.381068	0.816	0.493	0.391438	MA0512.2	Rxra
MA0419.1	0.000340134	0.885948	0.737	0.478	0.559861	MA0419.1	YAP7
MA0967.1	0.000804978	2.67575	0.658	0.478	1	MA0967.1	BZIP60
MA0857.1	0.00116275	0.322848	0.737	0.498	1	MA0857.1	Rarb
MA0859.1	0.00122121	0.411617	0.737	0.487	1	MA0859.1	Rarg
MA1622.1	0.00160261	3.97004	0.658	0.431	1	MA1622.1	Smad2::Smad3
MA0272.1	0.00269454	1.97839	0.711	0.464	1	MA0272.1	ARG81
MA1087.1	0.00331023	0.261208	0.737	0.465	1	MA1087.1	WRKY45
MA0477.2	0.00497207	1.0144	0.632	0.407	1	MA0477.2	FOSL1
MA1335.1	0.00517358	1.54853	0.632	0.486	1	MA1335.1	TGA4
MA0279.1	0.0070923	0.3676	0.711	0.466	1	MA0279.1	CAD1
MA0729.1	0.00924586	0.26681	0.684	0.485	1	MA0729.1	RARA
MA1047.2	0.00932702	1.70727	0.605	0.482	1	MA1047.2	TGA5
MA1389.1	0.00937859	0.538051	0.711	0.498	1	MA1389.1	PHL1
MA1556.1	0.0110687	0.501643	0.632	0.473	1	MA1556.1	RXRG(var.2)
MA1384.1	0.0111207	0.438849	0.684	0.488	1	MA1384.1	PHL7
MA0255.1	0.0145984	0.315908	0.658	0.48	1	MA0255.1	z
MA0451.1	0.014766	0.561404	0.632	0.481	1	MA0451.1	kni
MA1336.1	0.014803	1.90233	0.579	0.482	1	MA1336.1	TGA3
MA1045.1	0.0148977	0.615626	0.632	0.479	1	MA1045.1	NAC043
MA1350.1	0.0154018	0.51497	0.632	0.473	1	MA1350.1	bZIP42
MA1346.1	0.0155021	1.63517	0.553	0.476	1	MA1346.1	TGA10
MA1475.1	0.0173355	0.649283	0.526	0.486	1	MA1475.1	CREB3L4(var.2)
MA0526.3	0.0187428	0.330357	0.711	0.478	1	MA0526.3	USF2
MA0160.1	0.020288	1.25095	0.632	0.471	1	MA0160.1	NR4A2
MA1342.1	0.0204793	2.71028	0.579	0.475	1	MA1342.1	bZIP50
MA1127.1	0.021789	1.57543	0.553	0.485	1	MA1127.1	FOSB::JUN
MA1070.1	0.0227459	1.10963	0.553	0.478	1	MA1070.1	TGA7
MA0128.1	0.0303481	0.316525	0.632	0.516	1	MA0128.1	EmBP-1
MA1676.1	0.0324656	0.350032	0.684	0.488	1	MA1676.1	NAC062
MA1175.1	0.0335996	0.297156	0.632	0.464	1	MA1175.1	MYB81
MA0018.4	0.0337435	1.27761	0.605	0.489	1	MA0018.4	CREB1
MA0459.1	0.0347267	0.424852	0.658	0.477	1	MA0459.1	tll
MA1111.1	0.0355332	0.581413	0.553	0.473	1	MA1111.1	NR2F2
MA0573.1	0.0357518	0.871149	0.579	0.479	1	MA0573.1	ATHB-9
MA1348.1	0.0415845	0.784079	0.579	0.482	1	MA1348.1	TGA9
MA0962.1	0.0424467	0.291092	0.579	0.482	1	MA0962.1	BHLH34
MA1133.1	0.0578134	1.29597	0.553	0.498	1	MA1133.1	JUN::JUNB(var.2)
MA1145.1	0.0603112	1.91436	0.553	0.47	1	MA1145.1	FOSL2::JUND(var.2)
MA1168.1	0.0675575	0.420145	0.658	0.513	1	MA1168.1	MYR2
MA1345.1	0.071104	0.486965	0.658	0.491	1	MA1345.1	bZIP48
MA0420.1	0.074422	0.267024	0.632	0.489	1	MA0420.1	ERT1
MA0596.1	0.0752862	0.682758	0.632	0.507	1	MA0596.1	SREBF2
MA1470.1	0.0795728	0.31371	0.579	0.498	1	MA1470.1	BACH2(var.2)
MA0582.1	0.083553	0.438189	0.579	0.493	1	MA0582.1	RAV1
MA0534.1	0.08564	0.599983	0.605	0.492	1	MA0534.1	EcR::usp
MA0656.1	0.0949807	0.673247	0.553	0.474	1	MA0656.1	JDP2(var.2)
MA0139.1	0.103996	0.46652	0.553	0.478	1	MA0139.1	CTCF
MA0862.1	0.108419	0.582824	0.684	0.498	1	MA0862.1	GMEB2
MA1129.1	0.11367	0.786122	0.632	0.49	1	MA1129.1	FOSL1::JUN(var.2)
MA0609.2	0.115721	1.09154	0.526	0.499	1	MA0609.2	CREM
MA0605.2	0.122731	0.595875	0.526	0.484	1	MA0605.2	ATF3
MA1140.2	0.143804	0.382055	0.553	0.49	1	MA1140.2	JUNB(var.2)
MA1434.1	0.179951	0.322032	0.632	0.469	1	MA1434.1	NCU02182
MA1451.1	0.18425	0.495108	0.605	0.48	1	MA1451.1	nhr-6
MA0469.3	0.239177	0.738313	0.5	0.493	1	MA0469.3	E2F3
MA1243.1	0.249746	0.775001	0.526	0.495	1	MA1243.1	DREB19
MA0840.1	0.253948	0.856445	0.5	0.474	1	MA0840.1	Creb5
MA1139.1	0.266105	0.620996	0.526	0.474	1	MA1139.1	FOSL2::JUNB(var.2)
MA0492.1	0.280603	0.533495	0.605	0.48	1	MA0492.1	JUND(var.2)
MA0834.1	0.286268	0.491987	0.5	0.475	1	MA0834.1	ATF7
MA1131.1	0.297324	0.964783	0.474	0.468	1	MA1131.1	FOSL2::JUN(var.2)
MA1136.1	0.302053	0.422451	0.5	0.503	1	MA1136.1	FOSB::JUNB(var.2)
MA1536.1	0.3481	0.327948	0.447	0.485	1	MA1536.1	NR2C2(var.2)
MA0415.1	0.427748	0.349198	0.474	0.49	1	MA0415.1	YAP1
MA1177.1	0.440362	0.395346	0.474	0.481	1	MA1177.1	MYB65
MA1632.1	0.527596	0.493228	0.5	0.507	1	MA1632.1	ATF2
MA0098.3	0.534865	0.868465	0.5	0.463	1	MA0098.3	ETS1
MA0838.1	0.562559	0.660811	0.5	0.476	1	MA0838.1	CEBPG
MA1594.1	0.581391	0.261573	0.316	0.481	1	MA1594.1	ZNF382
MA0475.2	0.589048	0.644302	0.368	0.463	1	MA0475.2	FLI1
MA0759.1	0.643623	0.388628	0.5	0.455	1	MA0759.1	ELK3
MA0382.1	0.674603	0.332176	0.342	0.491	1	MA0382.1	SKO1
MA0100.3	0.704972	0.483407	0.553	0.497	1	MA0100.3	MYB
MA0391.1	0.707517	0.262154	0.553	0.485	1	MA0391.1	STB4
MA0474.2	0.74239	0.942955	0.526	0.465	1	MA0474.2	ERG
MA0946.1	0.820892	0.354639	0.447	0.479	1	MA0946.1	ARR11
MA0156.2	0.858456	0.834775	0.474	0.458	1	MA0156.2	FEV
MA0447.1	0.881312	0.477878	0.447	0.487	1	MA0447.1	gt
MA0760.1	0.909905	0.707575	0.342	0.473	1	MA0760.1	ERF
MA0076.2	0.959782	0.336646	0.447	0.461	1	MA0076.2	ELK4
MA0972.1	0.978206	0.667665	0.526	0.473	1	MA0972.1	CCA1

## Sheet: 9.HB13hp.neural.SC.1
	p_val	avg_log2FC	pct.1	pct.2	p_val_adj	motif	motif.name
MA0878.2	2.19404e-25	0.94724	0.977	0.291	3.61139e-22	MA0878.2	CDX1
MA1473.1	8.00146e-24	1.15862	0.977	0.31	1.31704e-20	MA1473.1	CDX4
MA0650.2	3.1849e-23	1.8638	1	0.341	5.24235e-20	MA0650.2	HOXA13
MA0485.2	9.93377e-23	5.60414	0.932	0.383	1.6351e-19	MA0485.2	HOXC9
MA0909.2	3.4796e-22	0.937942	0.932	0.383	5.72743e-19	MA0909.2	HOXD13
MA1640.1	4.14279e-22	3.02494	0.932	0.422	6.81902e-19	MA1640.1	MEIS2(var.2)
MA0913.2	2.87608e-21	2.32205	0.955	0.375	4.73403e-18	MA0913.2	HOXD9
MA0465.2	2.87846e-20	2.52497	0.932	0.386	4.73794e-17	MA0465.2	CDX2
MA0165.1	1.42762e-19	1.3841	0.909	0.381	2.34986e-16	MA0165.1	Abd-B
MA0594.2	1.49158e-19	3.38908	0.932	0.424	2.45515e-16	MA0594.2	HOXA9
MA0873.1	5.89436e-19	0.802649	0.909	0.4	9.70212e-16	MA0873.1	HOXD12
MA1503.1	6.56683e-19	1.98413	0.932	0.395	1.0809e-15	MA1503.1	HOXB9
MA1113.2	1.53375e-18	2.48756	0.909	0.421	2.52455e-15	MA1113.2	PBX2
MA1506.1	2.47975e-18	3.13578	0.886	0.382	4.08167e-15	MA1506.1	HOXD10
MA0911.1	4.06588e-18	3.19937	0.932	0.418	6.69244e-15	MA0911.1	Hoxa11
MA0906.1	2.58347e-17	1.16019	0.864	0.406	4.25239e-14	MA0906.1	HOXC12
MA0907.1	3.68434e-17	1.6757	0.886	0.428	6.06443e-14	MA0907.1	HOXC13
MA0077.1	9.25614e-16	2.25785	0.955	0.48	1.52356e-12	MA0077.1	SOX9
MA0908.1	1.04875e-15	1.84659	0.932	0.411	1.72624e-12	MA0908.1	HOXD11
MA0651.1	2.80504e-15	2.45098	0.886	0.405	4.61709e-12	MA0651.1	HOXC11
MA0905.1	1.68738e-13	0.45491	0.932	0.405	2.77743e-10	MA0905.1	HOXC10
MA0434.1	8.50527e-13	2.85338	0.864	0.451	1.39997e-09	MA0434.1	YPR013C
MA0445.1	2.07993e-12	1.72425	0.909	0.485	3.42356e-09	MA0445.1	D
MA0899.1	3.87868e-12	0.371256	0.886	0.413	6.3843e-09	MA0899.1	HOXA10
MA0868.2	4.17286e-12	2.01853	0.818	0.469	6.86853e-09	MA0868.2	SOX8
MA1639.1	1.04907e-11	0.871356	0.886	0.435	1.72677e-08	MA1639.1	MEIS1(var.2)
MA0143.4	3.02915e-11	1.67442	0.818	0.479	4.98598e-08	MA0143.4	SOX2
MA1149.1	5.62192e-11	1.33461	0.841	0.433	9.25368e-08	MA1149.1	RARA::RXRG
MA0730.1	9.48434e-11	2.27429	0.864	0.464	1.56112e-07	MA0730.1	RARA(var.2)
MA0515.1	2.36368e-10	0.830927	0.886	0.458	3.89062e-07	MA0515.1	Sox6
MA0858.1	4.0805e-10	1.53638	0.818	0.453	6.71651e-07	MA0858.1	Rarb(var.2)
MA0514.1	4.73145e-10	1.1764	0.909	0.481	7.78796e-07	MA0514.1	Sox3
MA0924.1	2.27157e-09	1.17735	0.75	0.446	3.73901e-06	MA0924.1	pal-1
MA1120.1	4.05779e-09	1.37969	0.818	0.469	6.67913e-06	MA1120.1	SOX13
MA0159.1	4.86099e-09	2.30457	0.864	0.45	8.00119e-06	MA0159.1	RARA::RXRA
MA0867.2	1.16122e-08	0.931782	0.864	0.478	1.91137e-05	MA0867.2	SOX4
MA0381.1	1.3125e-08	1.08041	0.841	0.449	2.16038e-05	MA0381.1	SKN7
MA0629.1	3.19818e-08	1.93311	0.705	0.454	5.2642e-05	MA0629.1	Rhox11
MA0078.1	6.0349e-08	1.1027	0.864	0.475	9.93345e-05	MA0078.1	Sox17
MA1554.1	8.15788e-08	1.14579	0.773	0.462	0.000134279	MA1554.1	RFX7
MA1152.1	3.24974e-07	0.891195	0.75	0.48	0.000534907	MA1152.1	SOX15
MA0914.1	4.43378e-07	0.953672	0.864	0.451	0.0007298	MA0914.1	ISL2
MA0667.1	2.63825e-06	0.680645	0.727	0.476	0.00434255	MA0667.1	MYF6
MA0371.1	4.63597e-06	1.20043	0.773	0.47	0.0076308	MA0371.1	ROX1
MA0694.1	7.81889e-06	1.25872	0.705	0.508	0.0128699	MA0694.1	ZBTB7B
MA1563.1	8.10106e-06	0.660778	0.841	0.493	0.0133343	MA1563.1	SOX18
MA0442.2	2.00301e-05	0.763477	0.795	0.468	0.0329695	MA0442.2	SOX10
MA1562.1	0.00010841	0.80159	0.773	0.467	0.178442	MA1562.1	SOX14
MA1110.1	0.000528562	0.473624	0.75	0.478	0.870013	MA1110.1	NR1H4
MA0084.1	0.000670062	0.46543	0.682	0.469	1	MA0084.1	SRY
MA0327.1	0.000884789	0.567509	0.659	0.479	1	MA0327.1	HMRA1
MA1460.1	0.000912293	0.592448	0.659	0.47	1	MA1460.1	pho
MA1336.1	0.00127755	0.786542	0.727	0.475	1	MA1336.1	TGA3
MA0752.1	0.00163611	0.937064	0.636	0.448	1	MA0752.1	ZNF410
MA1600.1	0.0021104	0.52141	0.705	0.489	1	MA1600.1	ZNF684
MA0363.1	0.00223792	0.343463	0.636	0.494	1	MA0363.1	REB1
MA0395.1	0.00267314	0.605409	0.682	0.49	1	MA0395.1	STP2
MA0866.1	0.00296328	1.77326	0.659	0.486	1	MA0866.1	SOX21
MA0560.1	0.0030066	0.316439	0.636	0.488	1	MA0560.1	PIF3
MA1351.1	0.00322808	0.778345	0.614	0.478	1	MA1351.1	GBF3
MA0869.1	0.00370367	0.692131	0.705	0.483	1	MA0869.1	Sox11
MA0126.1	0.00400746	0.769855	0.659	0.476	1	MA0126.1	ovo
MA0239.1	0.00400746	0.769855	0.659	0.476	1	MA0239.1	prd
MA1047.2	0.00416104	0.694189	0.727	0.476	1	MA1047.2	TGA5
MA0586.2	0.00419675	0.650004	0.614	0.477	1	MA0586.2	SPL14
MA1438.1	0.00439667	0.417934	0.682	0.471	1	MA1438.1	atf-7
MA0695.1	0.00457498	0.842629	0.636	0.489	1	MA0695.1	ZBTB7C
MA0062.3	0.00558425	0.544747	0.705	0.472	1	MA0062.3	GABPA
MA0605.2	0.00573613	1.04602	0.682	0.476	1	MA0605.2	ATF3
MA0562.1	0.00611681	0.891244	0.614	0.483	1	MA0562.1	PIF5
MA1583.1	0.00665432	0.47527	0.682	0.489	1	MA1583.1	ZFP57
MA1234.1	0.0070774	0.487452	0.545	0.478	1	MA1234.1	ERF017
MA0270.1	0.00712406	0.482136	0.659	0.511	1	MA0270.1	AFT2
MA1145.1	0.00746727	0.45277	0.636	0.466	1	MA1145.1	FOSL2::JUND(var.2)
MA1691.1	0.00788655	0.563642	0.727	0.49	1	MA1691.1	ARF27
MA0582.1	0.00806367	0.673734	0.659	0.489	1	MA0582.1	RAV1
MA0421.1	0.0102489	0.561626	0.568	0.47	1	MA0421.1	NSI1
MA1139.1	0.0105476	0.2847	0.659	0.467	1	MA1139.1	FOSL2::JUNB(var.2)
MA1131.1	0.0107032	0.475881	0.614	0.461	1	MA1131.1	FOSL2::JUN(var.2)
MA1342.1	0.0115229	0.310668	0.659	0.47	1	MA1342.1	bZIP50
MA1059.2	0.0115466	0.565816	0.636	0.494	1	MA1059.2	SPL5
MA0002.2	0.0115542	0.497619	0.682	0.474	1	MA0002.2	RUNX1
MA0108.2	0.0116936	0.508133	0.682	0.499	1	MA0108.2	TBP
MA0656.1	0.0124352	0.520276	0.636	0.469	1	MA0656.1	JDP2(var.2)
MA1340.1	0.0131691	0.621112	0.568	0.49	1	MA1340.1	bZIP3
MA0761.2	0.0139892	0.650835	0.682	0.482	1	MA0761.2	ETV1
MA1409.1	0.0144693	0.300753	0.659	0.474	1	MA1409.1	OsRR22
MA1126.1	0.0146719	0.401161	0.659	0.475	1	MA1126.1	FOS::JUN(var.2)
MA1632.1	0.0185565	0.338534	0.682	0.498	1	MA1632.1	ATF2
MA1289.1	0.0209414	0.554675	0.682	0.487	1	MA1289.1	TCP3
MA1159.1	0.0210337	0.286058	0.614	0.47	1	MA1159.1	SGR5
MA1346.1	0.0212522	0.406438	0.682	0.469	1	MA1346.1	TGA10
MA0314.1	0.0217185	0.443547	0.682	0.496	1	MA0314.1	HAP3
MA0967.1	0.0217885	0.3672	0.705	0.475	1	MA0967.1	BZIP60
MA1282.1	0.0225392	0.357038	0.614	0.509	1	MA1282.1	PTF1
MA0640.2	0.0271733	0.606662	0.591	0.477	1	MA0640.2	ELF3
MA1070.1	0.0307464	0.449886	0.591	0.476	1	MA1070.1	TGA7
MA1365.2	0.0333328	0.297064	0.568	0.481	1	MA1365.2	AT5G47660
MA0083.3	0.0333378	0.514114	0.636	0.501	1	MA0083.3	SRF
MA1649.1	0.0344376	0.358967	0.636	0.471	1	MA1649.1	ZBTB12
MA1561.1	0.0455999	0.385868	0.659	0.466	1	MA1561.1	SOX12
MA1248.1	0.0487122	0.309909	0.545	0.482	1	MA1248.1	DREB26
MA1067.1	0.0686507	0.300246	0.568	0.482	1	MA1067.1	TCP5
MA0473.3	0.072175	0.523277	0.682	0.49	1	MA0473.3	ELF1
MA0598.3	0.0747511	0.406064	0.591	0.472	1	MA0598.3	EHF
MA0494.1	0.0774366	0.349749	0.568	0.485	1	MA0494.1	Nr1h3::Rxra
MA1697.1	0.0961057	0.378239	0.523	0.477	1	MA1697.1	ARF4
MA1436.1	0.101856	0.260353	0.591	0.496	1	MA1436.1	nuc-1
MA0968.2	0.111375	0.782717	0.523	0.49	1	MA0968.2	bZIP68
MA1364.1	0.123447	0.276263	0.568	0.501	1	MA1364.1	PIF7
MA1301.1	0.124169	0.423613	0.364	0.472	1	MA1301.1	WRKY33
MA0764.2	0.128905	0.323423	0.636	0.49	1	MA0764.2	ETV4
MA1255.1	0.149495	0.311603	0.545	0.478	1	MA1255.1	AT1G22810
MA0001.2	0.172784	0.518299	0.636	0.479	1	MA0001.2	AGL3
MA0393.1	0.174288	0.564773	0.568	0.466	1	MA0393.1	STE12
MA1178.1	0.186455	0.269955	0.523	0.467	1	MA1178.1	MYB3R1
MA0430.1	0.201578	0.322941	0.545	0.46	1	MA0430.1	YLR278C
MA0087.1	0.210548	0.557547	0.523	0.483	1	MA0087.1	Sox5
MA0638.1	0.240272	0.530149	0.523	0.491	1	MA0638.1	CREB3
MA0244.1	0.249882	0.38083	0.477	0.494	1	MA0244.1	slbo
MA1394.2	0.249897	0.312949	0.568	0.471	1	MA1394.2	MYB73
MA0566.1	0.267872	0.329013	0.523	0.507	1	MA0566.1	MYC2
MA0957.1	0.267872	0.329013	0.523	0.507	1	MA0957.1	BHLH3
MA0958.1	0.267872	0.329013	0.523	0.507	1	MA0958.1	BHLH13
MA0870.1	0.273866	0.44519	0.545	0.482	1	MA0870.1	Sox1
MA1068.1	0.31145	0.887034	0.5	0.478	1	MA1068.1	TGA2
MA0863.1	0.318911	0.870476	0.523	0.481	1	MA0863.1	MTF1
MA1295.1	0.331679	0.712996	0.568	0.5	1	MA1295.1	WRKY20
MA1058.1	0.332561	0.304348	0.545	0.483	1	MA1058.1	SPL4
MA0569.1	0.341566	0.299032	0.477	0.497	1	MA0569.1	MYC4
MA0440.1	0.356087	0.254695	0.568	0.501	1	MA0440.1	ZAP1
MA1434.1	0.397637	0.275419	0.5	0.475	1	MA1434.1	NCU02182
MA0949.1	0.524332	0.555442	0.477	0.485	1	MA0949.1	ARR2
MA0288.1	0.552485	0.251725	0.5	0.503	1	MA0288.1	CUP9
MA0930.1	0.566542	0.317576	0.455	0.457	1	MA0930.1	ABF3
MA0402.1	0.576428	0.495394	0.432	0.475	1	MA0402.1	SWI5
MA1290.1	0.645517	0.268521	0.545	0.496	1	MA1290.1	TCP17
MA1199.1	0.716364	0.474097	0.5	0.489	1	MA1199.1	AGL16
MA1010.1	0.731923	0.500631	0.455	0.472	1	MA1010.1	PHYPADRAFT_64121
MA1602.1	0.83706	0.705168	0.523	0.499	1	MA1602.1	ZSCAN29
MA0670.1	0.848062	0.368073	0.409	0.475	1	MA0670.1	NFIA
MA0012.1	0.859239	0.48279	0.409	0.488	1	MA0012.1	br(var.3)
MA1174.1	0.986335	0.395156	0.5	0.503	1	MA1174.1	MYB56
MA1291.1	0.986944	0.304769	0.591	0.501	1	MA1291.1	TCP7

## Sheet: 10.HB13hpf.neural.SC.2
	p_val	avg_log2FC	pct.1	pct.2	p_val_adj	motif	motif.name
MA1503.1	2.36609e-15	0.808972	1	0.4	3.89459e-12	MA1503.1	HOXB9
MA0650.2	1.23357e-14	1.10196	1	0.35	2.03046e-11	MA0650.2	HOXA13
MA0465.2	2.17763e-14	1.47868	1	0.392	3.58439e-11	MA0465.2	CDX2
MA0913.2	2.55085e-14	0.68967	1	0.382	4.19869e-11	MA0913.2	HOXD9
MA0651.1	6.82556e-14	1.88427	0.968	0.409	1.12349e-10	MA0651.1	HOXC11
MA0911.1	1.25353e-13	1.87895	0.968	0.424	2.06331e-10	MA0911.1	Hoxa11
MA0594.2	1.93394e-13	1.99873	0.968	0.43	3.18326e-10	MA0594.2	HOXA9
MA1149.1	2.22636e-13	1.91408	1	0.433	3.66459e-10	MA1149.1	RARA::RXRG
MA1640.1	6.30695e-13	2.54535	0.968	0.428	1.03812e-09	MA1640.1	MEIS2(var.2)
MA1113.2	5.50494e-12	2.07845	1	0.424	9.06112e-09	MA1113.2	PBX2
MA0907.1	1.12882e-11	1.13385	1	0.431	1.85804e-08	MA0907.1	HOXC13
MA0858.1	1.18332e-11	1.81595	0.968	0.453	1.94775e-08	MA0858.1	Rarb(var.2)
MA0908.1	4.31753e-11	0.511778	1	0.416	7.10665e-08	MA0908.1	HOXD11
MA0730.1	2.26623e-10	1.37795	1	0.465	3.73021e-07	MA0730.1	RARA(var.2)
MA0899.1	4.66724e-09	0.925094	0.935	0.418	7.68228e-06	MA0899.1	HOXA10
MA1639.1	7.11342e-09	0.620581	0.968	0.439	1.17087e-05	MA1639.1	MEIS1(var.2)
MA0159.1	1.97516e-08	1.13269	0.935	0.454	3.25112e-05	MA0159.1	RARA::RXRA
MA0629.1	1.84941e-07	1.47754	0.806	0.454	0.000304414	MA0629.1	Rhox11
MA0434.1	1.85171e-07	1.44953	0.839	0.458	0.000304791	MA0434.1	YPR013C
MA0924.1	2.39029e-07	0.517418	0.839	0.447	0.000393441	MA0924.1	pal-1
MA1282.1	6.78222e-07	1.26045	0.839	0.503	0.00111635	MA1282.1	PTF1
MA0143.4	9.67263e-07	1.42915	0.871	0.482	0.00159211	MA0143.4	SOX2
MA0515.1	1.1301e-06	0.707019	0.903	0.464	0.00186015	MA0515.1	Sox6
MA0514.1	4.93977e-06	0.943392	0.871	0.489	0.00813086	MA0514.1	Sox3
MA0868.2	1.06092e-05	0.971881	0.806	0.474	0.0174628	MA0868.2	SOX8
MA1054.1	7.4742e-05	0.977797	0.774	0.487	0.123025	MA1054.1	ARALYDRAFT_897773
MA1542.1	0.000165318	0.687768	0.742	0.474	0.272113	MA1542.1	OSR1
MA1120.1	0.000194861	0.780463	0.839	0.473	0.320741	MA1120.1	SOX13
MA1289.1	0.000203379	0.927831	0.806	0.485	0.334762	MA1289.1	TCP3
MA1504.1	0.000265486	0.307846	0.839	0.448	0.43699	MA1504.1	HOXC4
MA1211.1	0.000267125	0.848405	0.774	0.453	0.439688	MA1211.1	ATHB18
MA0077.1	0.000464137	0.602555	0.806	0.492	0.76397	MA0077.1	SOX9
MA0381.1	0.000520529	0.605576	0.806	0.456	0.856791	MA0381.1	SKN7
MA0445.1	0.000634635	0.312116	0.806	0.494	1	MA0445.1	D
MA0821.1	0.000819321	0.438391	0.774	0.503	1	MA0821.1	HES5
MA1035.1	0.000837119	1.07279	0.677	0.494	1	MA1035.1	TCP4
MA1434.1	0.000969621	0.646277	0.71	0.468	1	MA1434.1	NCU02182
MA1690.1	0.00142031	0.742608	0.839	0.497	1	MA1690.1	ARF25
MA1689.1	0.00181512	1.2485	0.613	0.489	1	MA1689.1	ARF18
MA1152.1	0.00264683	0.374791	0.774	0.483	1	MA1152.1	SOX15
MA1067.1	0.00293065	0.400007	0.742	0.478	1	MA1067.1	TCP5
MA0914.1	0.00299264	0.820591	0.645	0.465	1	MA0914.1	ISL2
MA0695.1	0.00317369	1.2739	0.71	0.489	1	MA0695.1	ZBTB7C
MA1097.1	0.00326742	0.386259	0.774	0.492	1	MA1097.1	ARALYDRAFT_493022
MA1290.1	0.00427193	0.643628	0.613	0.494	1	MA1290.1	TCP17
MA0469.3	0.00526114	1.14888	0.581	0.491	1	MA0469.3	E2F3
MA0694.1	0.00642741	1.62123	0.742	0.509	1	MA0694.1	ZBTB7B
MA0822.1	0.00800338	0.470034	0.71	0.501	1	MA0822.1	HES7
MA0597.1	0.0103623	0.727241	0.613	0.495	1	MA0597.1	THAP1
MA1563.1	0.0126418	0.264796	0.774	0.501	1	MA1563.1	SOX18
MA0020.1	0.0131214	0.596902	0.677	0.49	1	MA0020.1	Dof2
MA1096.1	0.0136993	0.475873	0.677	0.49	1	MA1096.1	ARALYDRAFT_496250
MA0327.1	0.0142477	0.540665	0.742	0.479	1	MA0327.1	HMRA1
MA1110.1	0.0157401	0.333425	0.71	0.483	1	MA1110.1	NR1H4
MA0100.3	0.0162864	0.579331	0.742	0.491	1	MA0100.3	MYB
MA0684.2	0.0165099	0.354521	0.742	0.465	1	MA0684.2	RUNX3
MA1050.1	0.0178269	0.86484	0.645	0.513	1	MA1050.1	OsI_08196
MA1696.1	0.023662	0.571748	0.645	0.487	1	MA1696.1	ARF39
MA0078.1	0.0256629	0.54925	0.677	0.486	1	MA0078.1	Sox17
MA0395.1	0.030259	0.350525	0.645	0.494	1	MA0395.1	STP2
MA1249.1	0.0303382	0.375768	0.645	0.484	1	MA1249.1	RAP210
MA0470.2	0.0308612	3.08784	0.581	0.459	1	MA0470.2	E2F4
MA1389.1	0.0313145	0.522757	0.645	0.502	1	MA1389.1	PHL1
MA0575.1	0.0365232	0.790006	0.548	0.477	1	MA0575.1	F3A4.140
MA1259.1	0.0385061	0.774486	0.613	0.482	1	MA1259.1	AT1G01250
MA1216.1	0.0391379	0.509701	0.613	0.485	1	MA1216.1	RAP21
MA0752.1	0.0391709	0.292459	0.613	0.452	1	MA0752.1	ZNF410
MA1057.1	0.0405571	0.251525	0.581	0.48	1	MA1057.1	SPL12
MA1206.1	0.041545	0.535598	0.645	0.469	1	MA1206.1	ARF2
MA1020.1	0.0418372	0.743834	0.645	0.484	1	MA1020.1	GT-1
MA0523.1	0.0441629	0.293727	0.742	0.486	1	MA0523.1	TCF7L2
MA0587.1	0.0488989	0.552519	0.645	0.497	1	MA0587.1	TCP16
MA0562.1	0.0493385	0.457243	0.613	0.485	1	MA0562.1	PIF5
MA0002.2	0.0534098	0.417209	0.613	0.479	1	MA0002.2	RUNX1
MA1562.1	0.0546123	0.387732	0.645	0.476	1	MA1562.1	SOX14
MA0024.3	0.0588828	2.86192	0.613	0.473	1	MA0024.3	E2F1
MA1219.1	0.0635247	0.271627	0.645	0.469	1	MA1219.1	CEJ1
MA1222.1	0.0648249	0.318535	0.581	0.473	1	MA1222.1	AT1G44830
MA1583.1	0.0673971	0.796049	0.613	0.494	1	MA1583.1	ZFP57
MA0244.1	0.0674305	0.503876	0.677	0.487	1	MA0244.1	slbo
MA1649.1	0.0678286	0.75658	0.613	0.474	1	MA1649.1	ZBTB12
MA1378.1	0.0716653	0.288235	0.581	0.482	1	MA1378.1	PLT3
MA1424.1	0.075245	0.390179	0.645	0.468	1	MA1424.1	ERF019
MA0034.1	0.0763477	0.281733	0.581	0.471	1	MA0034.1	Gam1
MA1093.1	0.0863923	0.514121	0.581	0.481	1	MA1093.1	WRKY75
MA1250.1	0.0878096	0.363953	0.613	0.465	1	MA1250.1	AT1G75490
MA0869.1	0.0918036	0.298838	0.581	0.491	1	MA0869.1	Sox11
MA0237.2	0.0918816	1.36545	0.645	0.477	1	MA0237.2	pan
MA0322.1	0.0990208	0.337154	0.677	0.492	1	MA0322.1	INO4
MA1685.1	0.108272	0.315796	0.613	0.493	1	MA1685.1	ARF10
MA1238.2	0.115425	0.803546	0.581	0.47	1	MA1238.2	ERF38
MA1697.1	0.120659	0.921541	0.516	0.478	1	MA1697.1	ARF4
MA0864.2	0.121957	2.38812	0.645	0.489	1	MA0864.2	E2F2
MA1233.2	0.122333	0.450476	0.548	0.478	1	MA1233.2	ERF021
MA0949.1	0.122523	0.312708	0.71	0.477	1	MA0949.1	ARR2
MA0620.3	0.122605	0.87146	0.613	0.476	1	MA0620.3	MITF
MA1265.2	0.128994	0.678138	0.516	0.474	1	MA1265.2	ERF015
MA0067.1	0.130077	0.311172	0.613	0.482	1	MA0067.1	Pax2
MA1460.1	0.132754	1.31673	0.581	0.476	1	MA1460.1	pho
MA0494.1	0.135915	0.313089	0.613	0.484	1	MA0494.1	Nr1h3::Rxra
MA0978.1	0.139279	0.422536	0.516	0.497	1	MA0978.1	DREB1E
MA1624.1	0.143082	0.472589	0.677	0.507	1	MA1624.1	Stat5a
MA0871.2	0.145697	1.1438	0.484	0.489	1	MA0871.2	TFEC
MA0946.1	0.151451	0.447857	0.581	0.474	1	MA0946.1	ARR11
MA1421.1	0.153938	0.391252	0.516	0.494	1	MA1421.1	TCF7L1
MA0768.1	0.154389	0.322932	0.613	0.486	1	MA0768.1	LEF1
MA1046.1	0.15958	0.359524	0.645	0.497	1	MA1046.1	NTL9
MA1415.1	0.163629	0.387922	0.613	0.508	1	MA1415.1	REF6
MA1414.1	0.180885	1.00723	0.581	0.469	1	MA1414.1	E2FA
MA1220.1	0.192102	0.381486	0.516	0.476	1	MA1220.1	TINY
MA0299.1	0.20124	0.44067	0.548	0.479	1	MA0299.1	GAL4
MA0931.1	0.201732	0.263191	0.484	0.491	1	MA0931.1	ABI5
MA1048.1	0.208494	0.332544	0.581	0.484	1	MA1048.1	ERF018
MA1251.1	0.211729	0.319296	0.516	0.483	1	MA1251.1	DEAR5
MA1159.1	0.212109	0.268368	0.613	0.472	1	MA1159.1	SGR5
MA0435.1	0.214194	0.394798	0.484	0.472	1	MA0435.1	YPR015C
MA0310.1	0.216008	0.471089	0.548	0.489	1	MA0310.1	HAC1
MA0541.1	0.216772	1.01472	0.516	0.473	1	MA0541.1	efl-1
MA0410.1	0.222411	0.911281	0.484	0.477	1	MA0410.1	UGA3
MA1055.1	0.231234	0.698852	0.516	0.492	1	MA1055.1	SPL1
MA0026.1	0.232714	0.892411	0.548	0.482	1	MA0026.1	Eip74EF
MA1234.1	0.245088	0.443896	0.613	0.477	1	MA1234.1	ERF017
MA0401.1	0.251564	0.468516	0.548	0.486	1	MA0401.1	SWI4
MA0011.1	0.255275	0.415192	0.516	0.476	1	MA0011.1	br(var.2)
MA0384.1	0.265518	0.395941	0.516	0.468	1	MA0384.1	SNT2
MA1692.1	0.272036	0.953255	0.581	0.476	1	MA1692.1	ARF29
MA1229.1	0.291202	0.575689	0.484	0.474	1	MA1229.1	AT2G44940
MA1045.1	0.292981	0.487144	0.419	0.487	1	MA1045.1	NAC043
MA0486.2	0.309056	0.533175	0.452	0.467	1	MA0486.2	HSF1
MA1339.1	0.31273	1.07072	0.355	0.495	1	MA1339.1	bZIP43
MA1205.1	0.344844	0.407198	0.548	0.504	1	MA1205.1	AGL6
MA1695.1	0.371661	0.408007	0.484	0.495	1	MA1695.1	ARF36
MA0955.1	0.375309	0.495947	0.484	0.491	1	MA0955.1	POPTR_0002s00440g
MA0776.1	0.384611	0.592059	0.452	0.473	1	MA0776.1	MYBL1
MA1287.1	0.387923	0.382527	0.613	0.509	1	MA1287.1	TCP21
MA0750.2	0.40597	0.519392	0.581	0.47	1	MA0750.2	ZBTB7A
MA0352.1	0.424028	0.622517	0.581	0.472	1	MA0352.1	PDR1
MA0265.1	0.431784	0.925539	0.452	0.492	1	MA0265.1	ABF1
MA1241.1	0.435548	0.41279	0.516	0.466	1	MA1241.1	AT4G32800
MA1459.1	0.457789	0.988586	0.581	0.507	1	MA1459.1	M1BP
MA0895.1	0.458533	1.10319	0.516	0.511	1	MA0895.1	HMBOX1
MA0944.1	0.467817	1.2108	0.484	0.49	1	MA0944.1	ARF8
MA1248.1	0.46907	0.277316	0.613	0.481	1	MA1248.1	DREB26
MA1314.1	0.470305	0.61354	0.548	0.486	1	MA1314.1	WRKY14
MA1407.1	0.482603	1.7375	0.387	0.49	1	MA1407.1	bZIP14
MA1687.1	0.489644	0.451817	0.452	0.484	1	MA1687.1	ARF14
MA1261.1	0.491172	0.290512	0.419	0.472	1	MA1261.1	AT5G67000
MA0535.1	0.514077	2.50512	0.452	0.468	1	MA0535.1	Mad
MA0995.2	0.524228	0.498708	0.581	0.48	1	MA0995.2	ERF039
MA1091.1	0.531182	0.388606	0.484	0.46	1	MA1091.1	WRKY62
MA0098.3	0.54216	1.1879	0.645	0.458	1	MA0098.3	ETS1
MA0983.1	0.549228	0.587558	0.452	0.486	1	MA0983.1	DOF5.6
MA1291.1	0.554152	0.276196	0.452	0.507	1	MA1291.1	TCP7
MA0185.1	0.554427	0.375096	0.516	0.486	1	MA0185.1	Deaf1
MA0411.1	0.563185	0.823189	0.484	0.483	1	MA0411.1	UPC2
MA0096.1	0.568411	3.96253	0.419	0.498	1	MA0096.1	bZIP910
MA0507.1	0.570841	0.707131	0.419	0.498	1	MA0507.1	POU2F2
MA1157.1	0.583642	0.592466	0.516	0.48	1	MA1157.1	NUC
MA1069.1	0.593137	0.261055	0.387	0.484	1	MA1069.1	TGA6
MA0475.2	0.599666	0.26132	0.516	0.457	1	MA0475.2	FLI1
MA0945.1	0.601211	0.310684	0.516	0.504	1	MA0945.1	ARR1
MA1230.1	0.605425	0.454402	0.548	0.466	1	MA1230.1	ERF037
MA1573.1	0.612358	0.267665	0.516	0.479	1	MA1573.1	THAP11
MA1253.1	0.620778	0.553256	0.452	0.479	1	MA1253.1	AT3G16280
MA0436.1	0.630726	0.330383	0.355	0.492	1	MA0436.1	YPR022C
MA0604.1	0.638582	0.575637	0.516	0.495	1	MA0604.1	Atf1
MA1676.1	0.652385	0.322966	0.484	0.496	1	MA1676.1	NAC062
MA0474.2	0.684626	1.76548	0.613	0.462	1	MA0474.2	ERG
MA1089.1	0.701814	0.275963	0.548	0.462	1	MA1089.1	WRKY57
MA0289.1	0.722136	0.663474	0.516	0.49	1	MA0289.1	DAL80
MA1318.1	0.734749	0.252482	0.484	0.491	1	MA1318.1	WRKY27
MA0071.1	0.786361	0.669692	0.516	0.481	1	MA0071.1	RORA
MA0763.1	0.787581	0.69367	0.516	0.453	1	MA0763.1	ETV3
MA1576.1	0.788397	0.281961	0.548	0.484	1	MA1576.1	THRB(var.3)
MA0760.1	0.799254	0.350635	0.484	0.467	1	MA0760.1	ERF
MA0534.1	0.810763	0.250885	0.516	0.496	1	MA0534.1	EcR::usp
MA1361.1	0.817229	1.75093	0.323	0.49	1	MA1361.1	bHLH18
MA0283.1	0.832872	1.12113	0.484	0.47	1	MA0283.1	CHA4
MA0969.1	0.83485	1.37304	0.452	0.474	1	MA0969.1	CMTA2
MA1484.1	0.84328	0.998468	0.387	0.479	1	MA1484.1	ETS2
MA0361.1	0.856908	0.362353	0.452	0.487	1	MA0361.1	RDS1
MA0429.1	0.856908	0.362353	0.452	0.487	1	MA0429.1	YLL054C
MA0156.2	0.871503	0.364394	0.452	0.459	1	MA0156.2	FEV
MA0948.1	0.884597	0.323064	0.484	0.483	1	MA0948.1	ARR18
MA0330.1	0.892169	2.01686	0.387	0.474	1	MA0330.1	MBP1::SWI6
MA1077.1	0.912229	0.28275	0.484	0.477	1	MA1077.1	WRKY18
MA1167.1	0.919964	0.251974	0.387	0.474	1	MA1167.1	EFM
MA1166.1	0.920674	0.281672	0.419	0.471	1	MA1166.1	PHL12
MA1068.1	0.949363	1.51521	0.452	0.48	1	MA1068.1	TGA2
MA0028.2	0.982923	0.278636	0.484	0.481	1	MA0028.2	ELK1
MA1579.1	0.990971	0.423451	0.387	0.462	1	MA1579.1	ZBTB26

[truncated: 64 more sheets: 11.HB13hpf.neural.SC.3, 12.HB13hpf.neural.CHB.1, 13.HB13hpf.neural.CHB.2, 14.HB13hpf.neural.CHB.3, 15.HB13hpf.neural.Ciliated, 16.HB13hpf.neural.FB.1, 17.HB13hpf.neural.FB.2, 18.HB13hpf.neural.FB.3, 19.HB13hpf.neural.FB.4, 20.HB13hpf.neural.MB.1, 21.HB13hpf.neural.MB.2, 22.HB13hpf.neural.MB.3, 23.HB13hpf.neural.MHB.1, 24.HB13hpf.neural.MHB.2, 25.HB13hpf.neural.MHB.3, 26.HB13hpf.neural.MHB.4, 27.HB13hpf.neural.MHB.5, 28.HB13hpf.neural.Neuron, 29.HB16hpf.neural.r1, 30.HB16hpf.neural.r2 …]
