# Supplementary material for: scMultiome analysis identifies embryonic hindbrain progenitors with mixed rhombomere identities
Source: eLife. 2023 Nov 10;12:e87772. doi: 10.7554/eLife.87772 (PMC10662952; doi:10.7554/eLife.87772)
Supplement: Figure 6—source data 1. [file elife-87772-fig6-data1.xlsx]

## Sheet: 1.Description
	This workbook lists all genes differentially expressed in each cluster relative to all clusters present in that analysis, as follows:
	Sheet	Content
	1	Description
	2	List of all genes differentially expressed in each cluster relative to all clusters observed in the integrated neural data set (res5.0)
	The columns in each sheet contain the following information:
	Column	Information
	A	Gene name
	B	p value
	C	fold change in gene expression between the specified cluster and all clusters; expressed as log2 of average for all cells in each cluster
	D	Percentage of cells in sample 1 expressing the gene
	E	Percentage of cells in sample 2 expressing the gene
	F	adjusted p value
	G	cluster number
	H	Gene name

## Sheet: 2.Integr.neural.marker.res.5
gene	p_val	avg_log2FC	pct.1	pct.2	p_val_adj	cluster	gene
stra6	5.83388e-86	1.69098	0.563	0.06	1.13772e-81	MB.1	stra6
dmbx1b	1.53249e-49	0.447485	0.286	0.024	2.98865e-45	MB.1	dmbx1b
ndst2b	4.59676e-38	1.24522	0.765	0.3	8.9646e-34	MB.1	ndst2b
otx2b	3.16679e-36	0.385652	0.311	0.041	6.17587e-32	MB.1	otx2b
otx1	7.25425e-34	0.537433	0.387	0.069	1.41472e-29	MB.1	otx1
rbp5	2.2138e-29	0.557164	0.336	0.061	4.31736e-25	MB.1	rbp5
fgfr2	3.56435e-28	1.1081	0.992	0.808	6.9512e-24	MB.1	fgfr2
mab21l2	3.51191e-26	0.431572	0.218	0.029	6.84892e-22	MB.1	mab21l2
ngfb	4.07614e-26	0.371555	0.218	0.029	7.94929e-22	MB.1	ngfb
kif5c	4.57365e-26	0.626097	0.303	0.055	8.91953e-22	MB.1	kif5c
otx2a	2.46736e-22	0.581175	0.311	0.067	4.81184e-18	MB.1	otx2a
SIPA1	6.04032e-20	0.536623	0.487	0.162	1.17798e-15	MB.1	SIPA1
ush1c	1.5481e-19	0.263373	0.176	0.025	3.01911e-15	MB.1	ush1c
fgfbp3	4.56229e-19	0.355587	0.261	0.055	8.89737e-15	MB.1	fgfbp3
pou3f3b	1.53672e-18	0.677182	0.597	0.26	2.99691e-14	MB.1	pou3f3b
tcf7l1b	2.5969e-17	0.978344	0.664	0.355	5.06448e-13	MB.1	tcf7l1b
dmbx1a	6.55081e-17	0.330361	0.252	0.056	1.27754e-12	MB.1	dmbx1a
efna2a	1.22819e-16	1.00319	0.815	0.564	2.39522e-12	MB.1	efna2a
ebf3a	1.27533e-16	0.918478	0.37	0.116	2.48716e-12	MB.1	ebf3a
syne1b	2.06235e-16	0.628942	0.378	0.119	4.022e-12	MB.1	syne1b
afap1l2	8.03861e-16	0.629374	0.235	0.055	1.56769e-11	MB.1	afap1l2
ek1	1.69774e-15	0.605805	0.513	0.21	3.31093e-11	MB.1	ek1
si:ch73-364h19.1	2.26307e-15	0.497101	0.504	0.201	4.41344e-11	MB.1	si:ch73-364h19.1
tcf7l2	3.64917e-15	1.01043	0.58	0.274	7.11661e-11	MB.1	tcf7l2
crb1	1.21351e-14	0.63333	0.647	0.329	2.36658e-10	MB.1	crb1
ntn1a	3.42338e-14	0.730618	0.765	0.43	6.67627e-10	MB.1	ntn1a
sall3b	5.66523e-14	0.493345	0.244	0.065	1.10483e-09	MB.1	sall3b
zfpm2b	1.54199e-13	0.413749	0.21	0.049	3.00719e-09	MB.1	zfpm2b
ptprnb	2.16951e-13	0.580452	0.807	0.487	4.23098e-09	MB.1	ptprnb
mbd3b	2.85624e-13	0.603541	0.857	0.63	5.57023e-09	MB.1	mbd3b
skia	7.27896e-13	0.622811	0.824	0.614	1.41954e-08	MB.1	skia
plxnb1a	1.89349e-12	0.411791	0.504	0.222	3.69268e-08	MB.1	plxnb1a
pdgfbb	3.04569e-12	0.417924	0.303	0.098	5.9397e-08	MB.1	pdgfbb
ncam1a	3.33989e-12	0.604441	0.966	0.851	6.51345e-08	MB.1	ncam1a
ptprn2	7.36232e-12	0.736987	0.748	0.531	1.4358e-07	MB.1	ptprn2
gria3b	1.12696e-11	0.492629	0.218	0.06	2.19781e-07	MB.1	gria3b
igf2b	2.1794e-11	0.436078	0.378	0.147	4.25026e-07	MB.1	igf2b
arhgap24	1.10591e-10	0.530811	0.328	0.13	2.15675e-06	MB.1	arhgap24
SAMD5	2.47498e-10	0.423606	0.311	0.118	4.82671e-06	MB.1	SAMD5
dock3	2.95764e-10	0.582237	0.319	0.13	5.76799e-06	MB.1	dock3
sulf2a	3.22797e-10	0.518026	0.37	0.155	6.29518e-06	MB.1	sulf2a
pou3f3a	8.06812e-10	0.339214	0.403	0.177	1.57344e-05	MB.1	pou3f3a
mecom	9.94175e-10	0.485241	0.126	0.027	1.93884e-05	MB.1	mecom
amot	2.80148e-09	0.481918	0.706	0.431	5.46345e-05	MB.1	amot
tmem47	1.00624e-08	0.436887	0.454	0.243	0.000196236	MB.1	tmem47
zbtb16b	4.10269e-08	0.477992	0.95	0.77	0.000800107	MB.1	zbtb16b
nova2	4.88561e-08	0.417911	1	0.948	0.000952791	MB.1	nova2
TENM2	5.83878e-08	0.486831	0.227	0.083	0.00113868	MB.1	TENM2
zbtb16a	9.83139e-08	0.390911	1	0.914	0.00191732	MB.1	zbtb16a
gli2a	3.69442e-07	0.366687	0.975	0.878	0.00720486	MB.1	gli2a
lin28a	4.6236e-07	0.480641	0.807	0.652	0.00901695	MB.1	lin28a
znrf3	5.21133e-07	0.414374	0.941	0.82	0.0101631	MB.1	znrf3
fzd7a	5.54841e-07	0.314426	0.437	0.245	0.0108205	MB.1	fzd7a
crb2a	8.64126e-07	0.465706	0.58	0.376	0.0168522	MB.1	crb2a
ephb2b	8.69258e-07	0.418763	0.513	0.305	0.0169523	MB.1	ephb2b
jag2b	9.53541e-07	0.421885	0.933	0.836	0.0185959	MB.1	jag2b
bmpr1ba	1.13725e-06	0.286565	0.622	0.371	0.0221786	MB.1	bmpr1ba
tet3	1.1704e-06	0.51136	0.874	0.702	0.0228252	MB.1	tet3
mpp5a	1.29341e-06	0.575949	0.605	0.431	0.0252241	MB.1	mpp5a
eml1	1.35959e-06	0.360896	0.336	0.169	0.0265147	MB.1	eml1
plxna1a	1.54303e-06	0.545146	0.706	0.579	0.0300922	MB.1	plxna1a
gphna	1.54478e-06	0.327852	0.445	0.254	0.0301264	MB.1	gphna
nav2b	1.78167e-06	0.403602	0.588	0.379	0.0347461	MB.1	nav2b
pbx4	2.02723e-06	0.347353	0.933	0.831	0.0395351	MB.1	pbx4
robo1	2.10377e-06	0.408448	0.983	0.877	0.0410277	MB.1	robo1
foxp4	2.12388e-06	0.308996	0.958	0.89	0.0414198	MB.1	foxp4
vwa7	2.15773e-06	0.330021	0.319	0.158	0.04208	MB.1	vwa7
tet2	3.5112e-06	0.461023	0.689	0.532	0.0684755	MB.1	tet2
zfhx4	4.2543e-06	0.405312	0.824	0.646	0.0829675	MB.1	zfhx4
fgfr3	6.25476e-06	0.752405	0.655	0.533	0.12198	MB.1	fgfr3
arhgap21a	7.56061e-06	0.304063	0.639	0.428	0.147447	MB.1	arhgap21a
plpp3	7.71601e-06	0.405534	0.546	0.366	0.150478	MB.1	plpp3
fsta	1.01585e-05	0.43832	0.336	0.181	0.19811	MB.1	fsta
ptpn13	1.67967e-05	0.284895	0.832	0.692	0.32757	MB.1	ptpn13
jak1	1.83822e-05	0.56538	0.521	0.369	0.358489	MB.1	jak1
epha4b	1.89964e-05	0.385884	0.731	0.536	0.370468	MB.1	epha4b
cxadr	1.95732e-05	0.337564	0.782	0.614	0.381717	MB.1	cxadr
mex3b	2.03739e-05	0.342478	0.546	0.373	0.397332	MB.1	mex3b
marcksl1a	2.28062e-05	0.325471	0.63	0.438	0.444766	MB.1	marcksl1a
adgrl2a	2.36003e-05	0.317673	0.95	0.858	0.460252	MB.1	adgrl2a
dennd5a	3.81903e-05	0.392329	0.605	0.428	0.744786	MB.1	dennd5a
iffo2a	4.2365e-05	0.30546	0.294	0.159	0.826203	MB.1	iffo2a
zgc:77158	5.17038e-05	0.455935	0.521	0.361	1	MB.1	zgc:77158
robo2.1	7.07599e-05	0.29194	0.277	0.146	1	MB.1	robo2.1
hs3st3b1b	7.80108e-05	0.421337	0.664	0.501	1	MB.1	hs3st3b1b
si:ch211-286o17.1	7.85392e-05	0.494999	0.529	0.359	1	MB.1	si:ch211-286o17.1
lmo3	8.51061e-05	0.307223	0.42	0.256	1	MB.1	lmo3
zgc:158463	8.5155e-05	0.284708	1	1	1	MB.1	zgc:158463
rasal2	8.89433e-05	0.339932	0.849	0.791	1	MB.1	rasal2
marcksl1b	9.38784e-05	0.282739	0.58	0.42	1	MB.1	marcksl1b
plp1a	0.000100272	0.315406	0.689	0.509	1	MB.1	plp1a
zgc:92107	0.000111115	0.302045	0.689	0.53	1	MB.1	zgc:92107
celsr1b	0.000119027	0.326491	0.782	0.654	1	MB.1	celsr1b
gli1	0.00013676	0.260879	0.445	0.288	1	MB.1	gli1
nrarpb	0.00014386	0.351904	0.445	0.303	1	MB.1	nrarpb
ccnd1	0.000154827	0.369055	0.807	0.73	1	MB.1	ccnd1
rybpb	0.000193273	0.262632	0.345	0.206	1	MB.1	rybpb
nav2a	0.000201083	0.337065	0.571	0.422	1	MB.1	nav2a
ccnd2a	0.000217622	0.30893	0.462	0.325	1	MB.1	ccnd2a
cemip2	0.000311551	0.274471	0.664	0.533	1	MB.1	cemip2
sdc4	0.000328401	0.285589	0.639	0.477	1	MB.1	sdc4
tmc5	0.000366718	0.25471	0.336	0.203	1	MB.1	tmc5
si:dkey-244a7.1	0.000394343	0.349698	0.471	0.336	1	MB.1	si:dkey-244a7.1
mdka	0.000455213	0.320949	0.664	0.512	1	MB.1	mdka
ptch1	0.000497151	0.413606	0.613	0.532	1	MB.1	ptch1
sema5ba	0.00050663	0.251751	0.681	0.508	1	MB.1	sema5ba
sox3	0.000566728	0.326352	0.496	0.367	1	MB.1	sox3
chrm4a	0.000710869	0.255362	0.261	0.151	1	MB.1	chrm4a
ripor1	0.000878843	0.260324	0.714	0.588	1	MB.1	ripor1
sesn1	0.000890601	0.266419	0.244	0.142	1	MB.1	sesn1
gpc4	0.000908908	0.283045	0.731	0.633	1	MB.1	gpc4
cldn5a	0.000921253	0.272736	0.588	0.458	1	MB.1	cldn5a
atf3	0.000921645	0.547353	0.395	0.274	1	MB.1	atf3
svild	0.000928371	0.429272	0.429	0.325	1	MB.1	svild
sugt1	0.00101647	0.272903	0.429	0.298	1	MB.1	sugt1
abcb5	0.00109334	0.322711	0.403	0.269	1	MB.1	abcb5
si:ch211-214c7.4	0.00113969	0.256527	0.429	0.301	1	MB.1	si:ch211-214c7.4
camk2g1	0.00124308	0.262145	0.681	0.547	1	MB.1	camk2g1
cachd1	0.00128475	0.320867	0.832	0.782	1	MB.1	cachd1
stat3	0.00138514	0.263737	0.706	0.557	1	MB.1	stat3
msi1	0.00150169	0.272357	0.866	0.776	1	MB.1	msi1
cbx7a	0.00253169	0.379017	0.261	0.166	1	MB.1	cbx7a
hsp90aa1.2	0.00278908	0.421945	0.487	0.364	1	MB.1	hsp90aa1.2
fbxo5	0.00280222	0.267041	0.546	0.431	1	MB.1	fbxo5
cenpf	0.00313783	0.304018	0.496	0.38	1	MB.1	cenpf
bcor	0.00328927	0.256092	0.429	0.307	1	MB.1	bcor
lrp2a	0.00369498	0.250698	0.782	0.723	1	MB.1	lrp2a
ranbp3b	0.00449482	0.257959	0.605	0.494	1	MB.1	ranbp3b
c4b	0.00507429	0.265983	0.303	0.2	1	MB.1	c4b
brdt	0.0052638	0.283602	0.723	0.648	1	MB.1	brdt
sfrp5	0.00544779	0.353289	0.235	0.145	1	MB.1	sfrp5
nr2f2	0.0061671	0.267021	0.471	0.361	1	MB.1	nr2f2
hs2st1b	0.00640401	0.29426	0.504	0.395	1	MB.1	hs2st1b
rbbp6	0.00670935	0.26673	0.723	0.693	1	MB.1	rbbp6
xylt1	0.00988471	0.251169	0.639	0.547	1	MB.1	xylt1
six7	9.0025e-106	1.111	0.408	0.012	1.75567e-101	MB.2	six7
lhx5	1.93362e-93	0.820362	0.324	0.007	3.77094e-89	MB.2	lhx5
nr2e1	9.55731e-65	0.595305	0.366	0.019	1.86387e-60	MB.2	nr2e1
arxb	2.62478e-36	0.424838	0.197	0.01	5.11884e-32	MB.2	arxb
emx3	1.10979e-34	0.479468	0.211	0.013	2.16432e-30	MB.2	emx3
otx2a1	2.04345e-34	0.771882	0.465	0.067	3.98514e-30	MB.2	otx2a
ek11	4.90055e-34	1.50622	0.761	0.209	9.55705e-30	MB.2	ek1
six3b	1.07633e-33	0.251565	0.141	0.005	2.09907e-29	MB.2	six3b
vcana	1.43136e-31	0.927675	0.451	0.071	2.79144e-27	MB.2	vcana
fezf2	5.33797e-29	0.343785	0.155	0.008	1.04101e-24	MB.2	fezf2
si:ch211-285f17.1	4.18236e-27	1.1779	0.817	0.301	8.15645e-23	MB.2	si:ch211-285f17.1
vasna	8.8574e-27	0.451365	0.31	0.038	1.72737e-22	MB.2	vasna
pdgfaa	7.30368e-25	0.608848	0.423	0.076	1.42436e-20	MB.2	pdgfaa
shisa2a	1.99881e-22	0.638813	0.296	0.043	3.89808e-18	MB.2	shisa2a
cntn3b	3.25664e-22	0.314331	0.183	0.016	6.35109e-18	MB.2	cntn3b
stra61	4.26854e-22	1.09416	0.394	0.076	8.3245e-18	MB.2	stra6
sox5	1.17273e-21	1.30299	0.648	0.226	2.28706e-17	MB.2	sox5
pax6a	7.27392e-20	0.93173	0.746	0.267	1.41856e-15	MB.2	pax6a
si:ch211-263k4.2	7.49614e-20	1.01771	0.31	0.055	1.4619e-15	MB.2	si:ch211-263k4.2
epha2b	7.79025e-19	1.13578	0.746	0.34	1.51925e-14	MB.2	epha2b
pde1a	1.06311e-18	0.619546	0.31	0.056	2.07328e-14	MB.2	pde1a
lhx2b	9.90674e-18	0.254255	0.113	0.007	1.93201e-13	MB.2	lhx2b
efnb2b	1.18285e-17	1.00689	0.845	0.429	2.30679e-13	MB.2	efnb2b
hs6st1a	1.36751e-16	0.965132	0.817	0.433	2.66691e-12	MB.2	hs6st1a
tcf7l21	1.41419e-16	1.20179	0.676	0.277	2.75796e-12	MB.2	tcf7l2
pag1	1.42343e-16	0.840801	0.563	0.193	2.77598e-12	MB.2	pag1
frem2b	2.40533e-16	0.337991	0.211	0.03	4.69087e-12	MB.2	frem2b
igdcc3	3.26997e-16	0.641314	0.465	0.13	6.3771e-12	MB.2	igdcc3
rbp51	4.26722e-15	0.5516	0.31	0.068	8.32193e-11	MB.2	rbp5
rorca	6.55958e-15	0.383193	0.197	0.029	1.27925e-10	MB.2	rorca
FP102911.1	1.72629e-14	0.373706	0.239	0.043	3.36661e-10	MB.2	FP102911.1
epha4a	1.90314e-14	0.619378	0.831	0.393	3.71151e-10	MB.2	epha4a
zfpm2b1	2.59423e-13	0.513126	0.254	0.051	5.05926e-09	MB.2	zfpm2b
fgfr31	3.66839e-13	0.897051	0.901	0.528	7.1541e-09	MB.2	fgfr3
ptprub	8.50704e-13	0.663135	0.521	0.197	1.65904e-08	MB.2	ptprub
otx2b1	2.12022e-12	0.369713	0.239	0.049	4.13485e-08	MB.2	otx2b
gpc6a	2.25029e-12	0.710971	0.648	0.305	4.38851e-08	MB.2	gpc6a
large2	2.92299e-12	0.787703	0.746	0.394	5.70042e-08	MB.2	large2
tenm3	4.19552e-12	0.892124	0.845	0.604	8.1821e-08	MB.2	tenm3
plxdc2	8.03125e-12	0.71217	0.887	0.606	1.56625e-07	MB.2	plxdc2
p3h2	1.35032e-11	0.592841	0.423	0.137	2.6334e-07	MB.2	p3h2
adamts18	3.56202e-11	0.591568	0.352	0.108	6.94665e-07	MB.2	adamts18
zfhx41	3.06947e-10	0.697657	0.873	0.648	5.98608e-06	MB.2	zfhx4
pappab	3.13096e-10	0.84157	0.507	0.212	6.106e-06	MB.2	pappab
sema3gb	3.67241e-10	0.645009	0.549	0.237	7.16193e-06	MB.2	sema3gb
tiam1a	4.65626e-10	0.737166	0.761	0.465	9.08064e-06	MB.2	tiam1a
zic1	5.22283e-10	0.256808	0.211	0.046	1.01856e-05	MB.2	zic1
epha7	6.93016e-10	0.549098	0.845	0.456	1.35152e-05	MB.2	epha7
pdgfaa.1	7.11573e-10	0.562404	0.239	0.061	1.38771e-05	MB.2	pdgfaa.1
pou2f2a.1	1.10315e-09	0.600343	0.465	0.189	2.15137e-05	MB.2	pou2f2a.1
pkdcca	1.38353e-09	0.336331	0.479	0.178	2.69815e-05	MB.2	pkdcca
si:ch211-269k10.2	1.56299e-09	0.519962	0.662	0.336	3.04815e-05	MB.2	si:ch211-269k10.2
ndst2b1	1.96121e-09	0.887785	0.606	0.314	3.82476e-05	MB.2	ndst2b
nhsl2	3.65538e-09	0.285869	0.239	0.062	7.12872e-05	MB.2	nhsl2
epha2a	3.82859e-09	0.505272	0.761	0.411	7.46651e-05	MB.2	epha2a
foxn3	5.02156e-09	0.436033	0.296	0.093	9.79306e-05	MB.2	foxn3
zgc:771581	5.73788e-09	0.659074	0.634	0.361	0.0001119	MB.2	zgc:77158
pcdh17	1.66523e-08	0.860171	0.31	0.106	0.000324754	MB.2	pcdh17
unc5b	2.42874e-08	0.463836	0.775	0.432	0.000473653	MB.2	unc5b
amot1	3.1905e-08	0.682772	0.732	0.435	0.000622212	MB.2	amot
fgfr4	4.31573e-08	0.649165	0.592	0.344	0.000841653	MB.2	fgfr4
dact1	7.46169e-08	0.280498	0.169	0.039	0.00145518	MB.2	dact1
camkmt	7.98247e-08	0.480809	0.366	0.143	0.00155674	MB.2	camkmt
chrd	8.78083e-08	0.270467	0.423	0.168	0.00171244	MB.2	chrd
ston2	1.41826e-07	0.465934	0.394	0.166	0.00276588	MB.2	ston2
epha3	2.54655e-07	0.528798	0.211	0.061	0.00496628	MB.2	epha3
met	4.8093e-07	0.599283	0.338	0.136	0.0093791	MB.2	met
afdna	6.48299e-07	0.533182	0.93	0.8	0.0126431	MB.2	afdna
grin2db	7.80851e-07	0.270962	0.127	0.027	0.0152282	MB.2	grin2db
tjp2b	1.14454e-06	0.37716	0.282	0.104	0.0223207	MB.2	tjp2b
tnfrsf19	1.26471e-06	0.545524	0.535	0.299	0.0246645	MB.2	tnfrsf19
her6	1.80101e-06	0.487644	0.366	0.156	0.0351234	MB.2	her6
si:dkey-274m17.3	3.63415e-06	0.307661	0.211	0.068	0.0708731	MB.2	si:dkey-274m17.3
wnt7ba	4.2998e-06	0.289704	0.225	0.077	0.0838547	MB.2	wnt7ba
man1a1	5.19954e-06	0.396249	0.324	0.14	0.101401	MB.2	man1a1
traf4a	5.53485e-06	0.525182	0.296	0.12	0.107941	MB.2	traf4a
sipa1l2	5.79947e-06	0.490762	0.817	0.653	0.113101	MB.2	sipa1l2
cachd11	8.57857e-06	0.612331	0.944	0.779	0.167299	MB.2	cachd1
si:dkey-240h12.3	8.59127e-06	0.384843	0.239	0.089	0.167547	MB.2	si:dkey-240h12.3
prom1a	8.70437e-06	0.32661	0.268	0.104	0.169753	MB.2	prom1a
si:ch211-222l21.1	8.85492e-06	0.452412	0.986	0.889	0.172689	MB.2	si:ch211-222l21.1
ptprn21	9.08135e-06	0.53725	0.761	0.535	0.177105	MB.2	ptprn2
ctnnb1	1.04573e-05	0.452321	0.831	0.651	0.203939	MB.2	ctnnb1
fgfr21	1.07744e-05	0.423763	0.944	0.813	0.210122	MB.2	fgfr2
otx11	1.21492e-05	0.32772	0.225	0.081	0.236934	MB.2	otx1
sdc2	1.27136e-05	0.313561	0.521	0.283	0.247941	MB.2	sdc2
chmp6b	1.37773e-05	0.501482	0.338	0.16	0.268685	MB.2	chmp6b
pbx3b	1.58981e-05	0.402866	0.408	0.199	0.310045	MB.2	pbx3b
wnt8b	2.09583e-05	0.311398	0.408	0.193	0.408728	MB.2	wnt8b
plxnb1a1	2.90859e-05	0.318767	0.451	0.229	0.567234	MB.2	plxnb1a
ZNF423	3.12335e-05	0.318986	0.761	0.478	0.609116	MB.2	ZNF423
si:dkey-112m2.1	3.14344e-05	0.446426	0.197	0.069	0.613034	MB.2	si:dkey-112m2.1
pax6b	3.74737e-05	0.553486	0.437	0.236	0.730811	MB.2	pax6b
syne1b1	3.75621e-05	0.280853	0.296	0.127	0.732537	MB.2	syne1b
sema3aa	3.8772e-05	0.353846	0.31	0.138	0.756132	MB.2	sema3aa
gabbr1a	4.61473e-05	0.256565	0.183	0.063	0.899964	MB.2	gabbr1a
lamb1a	4.85055e-05	0.273833	0.423	0.217	0.945955	MB.2	lamb1a
SEMA4F	5.20928e-05	0.363202	0.451	0.249	1	MB.2	SEMA4F
mycn	5.3815e-05	0.549169	0.549	0.344	1	MB.2	mycn
zfpm2a	5.93541e-05	0.310446	0.225	0.089	1	MB.2	zfpm2a
gdf11	5.96351e-05	0.445996	0.437	0.238	1	MB.2	gdf11
tle3b	6.07799e-05	0.418541	0.549	0.341	1	MB.2	tle3b
fgfrl1a	0.000106954	0.419003	0.31	0.147	1	MB.2	fgfrl1a
dvl3b	0.00013201	0.300588	0.38	0.201	1	MB.2	dvl3b
efnb3a	0.000142435	0.417255	0.423	0.243	1	MB.2	efnb3a
rspo2	0.000153585	0.286809	0.197	0.077	1	MB.2	rspo2
adgrl2a1	0.000171572	0.393766	0.972	0.859	1	MB.2	adgrl2a
mdka1	0.000179644	0.524549	0.69	0.514	1	MB.2	mdka
dennd5a1	0.000182476	0.349187	0.648	0.431	1	MB.2	dennd5a
fbrsl1	0.000190245	0.385836	0.521	0.329	1	MB.2	fbrsl1
iffo2a1	0.000204788	0.254128	0.324	0.161	1	MB.2	iffo2a
hsp70l	0.000255639	0.50192	0.239	0.108	1	MB.2	hsp70l
zbtb16b1	0.000258553	0.340255	0.93	0.775	1	MB.2	zbtb16b
slc35f1	0.000260408	0.265434	0.268	0.124	1	MB.2	slc35f1
canx	0.000267138	0.342123	0.704	0.557	1	MB.2	canx
gli2a1	0.000271289	0.326732	0.944	0.881	1	MB.2	gli2a
zgc:110158	0.000331308	0.395547	0.845	0.729	1	MB.2	zgc:110158
crb2a1	0.000428505	0.671745	0.549	0.381	1	MB.2	crb2a
raver2	0.000434355	0.377381	0.254	0.124	1	MB.2	raver2
slc38a2	0.000473829	0.46919	0.521	0.341	1	MB.2	slc38a2
gli3	0.000478404	0.389135	0.958	0.878	1	MB.2	gli3
aff2	0.000571942	0.430622	0.62	0.442	1	MB.2	aff2
kank1a	0.000610151	0.417294	0.366	0.202	1	MB.2	kank1a
jam3b	0.000781036	0.285412	0.634	0.467	1	MB.2	jam3b
alcama	0.00085573	0.343863	0.225	0.104	1	MB.2	alcama
her2	0.000865982	0.742938	0.38	0.237	1	MB.2	her2
emc2	0.00102035	0.319493	0.549	0.358	1	MB.2	emc2
hsp90ab1	0.00123363	0.45955	0.93	0.819	1	MB.2	hsp90ab1
marcksl1a1	0.00133516	0.292808	0.648	0.442	1	MB.2	marcksl1a
kiz	0.00161937	0.314999	0.38	0.233	1	MB.2	kiz
ror2	0.00162089	0.256975	0.634	0.457	1	MB.2	ror2
il12rb2l	0.00166173	0.262381	0.239	0.12	1	MB.2	il12rb2l
foxp41	0.00174617	0.423525	0.944	0.892	1	MB.2	foxp4
igf1ra	0.00196521	0.400794	0.775	0.712	1	MB.2	igf1ra
si:ch73-364h19.11	0.00202095	0.365616	0.352	0.212	1	MB.2	si:ch73-364h19.1
adam10a	0.00214541	0.257045	0.352	0.208	1	MB.2	adam10a
nav2a1	0.00225633	0.321664	0.606	0.424	1	MB.2	nav2a
jag2b1	0.00253487	0.357887	0.93	0.838	1	MB.2	jag2b
fosab	0.00281959	0.390517	0.493	0.33	1	MB.2	fosab
zgc:171772	0.00307756	0.336952	0.789	0.666	1	MB.2	zgc:171772
plxna1a1	0.00329884	0.347349	0.732	0.581	1	MB.2	plxna1a
zic2b	0.00355069	0.287104	0.451	0.28	1	MB.2	zic2b
bmp1a	0.00378169	0.286581	0.31	0.175	1	MB.2	bmp1a
eif3ea	0.0037834	0.277988	0.746	0.622	1	MB.2	eif3ea
shroom2a	0.00412315	0.329533	0.465	0.316	1	MB.2	shroom2a
aplp2	0.00417734	0.393164	0.521	0.381	1	MB.2	aplp2
ctdsp2	0.00453291	0.272162	0.282	0.165	1	MB.2	ctdsp2
rps4x	0.00525425	0.271876	0.718	0.622	1	MB.2	rps4x
hspa8	0.00577924	0.276838	0.761	0.67	1	MB.2	hspa8
ubr2	0.00581754	0.256047	0.465	0.321	1	MB.2	ubr2
celsr1b1	0.00582891	0.307751	0.761	0.657	1	MB.2	celsr1b
calr3a	0.00611133	0.287299	0.296	0.181	1	MB.2	calr3a
uggt2	0.00673921	0.342551	0.366	0.242	1	MB.2	uggt2
stox2b	0.00704804	0.37522	0.577	0.447	1	MB.2	stox2b
ybx1	0.00764282	0.313861	0.746	0.632	1	MB.2	ybx1
tiam2a	0.0084422	0.252702	0.789	0.648	1	MB.2	tiam2a
rpl39	0.00973499	0.265498	0.732	0.669	1	MB.2	rpl39
hsp70.3	0.00979245	0.463931	0.225	0.127	1	MB.2	hsp70.3
foxa2	2.24834e-35	0.348689	0.25	0.011	4.38472e-31	MB.3	foxa2
foxa1	4.47066e-23	0.280535	0.175	0.009	8.71868e-19	MB.3	foxa1
otx2a2	9.93481e-22	0.85929	0.475	0.072	1.93749e-17	MB.3	otx2a
dock31	1.58134e-20	1.29573	0.6	0.131	3.08393e-16	MB.3	dock3
scube3	9.91798e-20	1.53633	0.725	0.219	1.9342e-15	MB.3	scube3
shha	1.13391e-19	0.676292	0.275	0.027	2.21134e-15	MB.3	shha
ebf3a1	1.65554e-19	1.18072	0.6	0.121	3.22864e-15	MB.3	ebf3a
abi3a	1.37052e-17	0.326711	0.2	0.016	2.6728e-13	MB.3	abi3a
myo18aa	2.44385e-17	0.48352	0.275	0.031	4.766e-13	MB.3	myo18aa
afap1l21	4.69232e-16	0.80136	0.375	0.059	9.15095e-12	MB.3	afap1l2
foxa	6.8252e-15	0.338485	0.2	0.019	1.33105e-10	MB.3	foxa
nfia	4.93681e-14	1.25894	0.7	0.242	9.62778e-10	MB.3	nfia
plxnb1a2	9.83037e-14	0.923746	0.7	0.228	1.91712e-09	MB.3	plxnb1a
ntn1a1	1.19931e-13	1.19931	0.95	0.438	2.33889e-09	MB.3	ntn1a
sall3b1	1.58574e-13	0.585857	0.375	0.069	3.09251e-09	MB.3	sall3b
znf536	2.09102e-13	1.14051	0.5	0.123	4.0779e-09	MB.3	znf536
dmbx1b1	4.64014e-13	0.372738	0.25	0.033	9.04921e-09	MB.3	dmbx1b
lix1	5.58162e-13	0.552131	0.35	0.061	1.08853e-08	MB.3	lix1
shhb	8.0922e-13	0.497223	0.175	0.017	1.57814e-08	MB.3	shhb
spon1b	2.41752e-12	0.736946	0.3	0.048	4.71464e-08	MB.3	spon1b
tmem132e	3.32781e-11	1.24366	0.9	0.636	6.4899e-07	MB.3	tmem132e
cntn5	5.97396e-11	0.284895	0.175	0.02	1.16504e-06	MB.3	cntn5
scube1	1.2025e-10	0.638483	0.325	0.066	2.34512e-06	MB.3	scube1
ret	1.3216e-10	0.287895	0.15	0.015	2.57739e-06	MB.3	ret
ntn1b	1.50365e-10	1.15218	0.525	0.168	2.93241e-06	MB.3	ntn1b
rims2a	3.60712e-10	0.518211	0.3	0.06	7.0346e-06	MB.3	rims2a
nkx2.2b	4.25719e-10	0.311069	0.15	0.016	8.30238e-06	MB.3	nkx2.2b
podxl	4.45437e-10	0.695949	0.55	0.179	8.68692e-06	MB.3	podxl
plpp31	7.11728e-10	0.877416	0.775	0.368	1.38801e-05	MB.3	plpp3
gltpa	7.28273e-10	0.326571	0.2	0.029	1.42028e-05	MB.3	gltpa
TENM21	1.69447e-09	1.02052	0.35	0.086	3.30455e-05	MB.3	TENM2
pcdh7b	2.56638e-09	0.688301	0.325	0.076	5.00495e-05	MB.3	pcdh7b
ldlrad2	3.85919e-09	0.451994	0.375	0.094	7.52618e-05	MB.3	ldlrad2
fam131bb	4.72638e-09	0.336094	0.15	0.018	9.21739e-05	MB.3	fam131bb
lef1	5.00206e-09	0.648929	0.625	0.239	9.75501e-05	MB.3	lef1
rnf220a	5.6027e-09	0.973968	0.9	0.55	0.000109264	MB.3	rnf220a
MDFI	7.01267e-09	0.310643	0.225	0.04	0.000136761	MB.3	MDFI
sulf2a1	1.11752e-08	0.663277	0.5	0.16	0.000217939	MB.3	sulf2a
sim1a	2.15423e-08	0.315263	0.15	0.02	0.000420118	MB.3	sim1a
actn2b	3.8405e-08	0.314756	0.2	0.035	0.000748974	MB.3	actn2b
RIMS2	5.34624e-08	0.470986	0.5	0.173	0.00104262	MB.3	RIMS2
foxp42	8.78309e-08	0.71524	1	0.891	0.00171288	MB.3	foxp4
fndc3ba	1.29437e-07	0.77183	0.925	0.703	0.00252429	MB.3	fndc3ba
LO018333.1	1.33229e-07	0.275337	0.15	0.022	0.00259823	MB.3	LO018333.1
ephb3a	1.65259e-07	0.776602	0.675	0.339	0.00322287	MB.3	ephb3a
syne1b2	1.91032e-07	0.583861	0.4	0.127	0.0037255	MB.3	syne1b
lmo31	2.04834e-07	0.650207	0.6	0.258	0.00399468	MB.3	lmo3
crim1	2.10295e-07	0.415148	0.325	0.088	0.00410117	MB.3	crim1
ptch2	2.39471e-07	0.913547	0.625	0.308	0.00467017	MB.3	ptch2
spire1a	2.50407e-07	0.418275	0.4	0.124	0.00488344	MB.3	spire1a
tcf7l1b1	2.5239e-07	0.508188	0.775	0.364	0.00492211	MB.3	tcf7l1b
stox1	2.94162e-07	0.363764	0.3	0.078	0.00573675	MB.3	stox1
GFOD1	4.96043e-07	0.298956	0.225	0.049	0.00967382	MB.3	GFOD1
igf2b1	5.50651e-07	0.676257	0.425	0.154	0.0107388	MB.3	igf2b
ptprn22	7.19006e-07	0.949278	0.825	0.537	0.0140221	MB.3	ptprn2
BX663503.3	7.79206e-07	0.296049	0.225	0.05	0.0151961	MB.3	BX663503.3
nkx6.2	8.40105e-07	0.460501	0.275	0.072	0.0163837	MB.3	nkx6.2
foxp1b	9.15148e-07	0.91323	0.825	0.548	0.0178472	MB.3	foxp1b
col11a1a	1.09569e-06	0.595929	0.45	0.166	0.0213682	MB.3	col11a1a
prxl2b	1.30495e-06	0.352625	0.375	0.121	0.0254491	MB.3	prxl2b
nav3	1.39383e-06	0.358211	0.15	0.026	0.0271825	MB.3	nav3
ptch11	1.68563e-06	0.839321	0.8	0.532	0.0328732	MB.3	ptch1
kif5c1	1.75583e-06	0.51981	0.25	0.064	0.0342422	MB.3	kif5c
wif1	2.19313e-06	0.411055	0.15	0.026	0.0427705	MB.3	wif1
adgrv1	2.26516e-06	0.811397	0.95	0.769	0.0441752	MB.3	adgrv1
eya1	2.49687e-06	0.276713	0.3	0.084	0.048694	MB.3	eya1
pou2f2a.11	3.43928e-06	0.33447	0.5	0.192	0.0670728	MB.3	pou2f2a.1
lsp1a	4.16654e-06	0.511567	0.275	0.081	0.0812558	MB.3	lsp1a
si:dkey-91m11.5	6.6589e-06	0.328709	0.325	0.103	0.129862	MB.3	si:dkey-91m11.5
sema3bl	7.09903e-06	0.31123	0.15	0.028	0.138445	MB.3	sema3bl
tmem88b	7.43728e-06	0.277943	0.175	0.037	0.145042	MB.3	tmem88b
col27a1b	8.10965e-06	0.445091	0.3	0.092	0.158154	MB.3	col27a1b
cdh11	9.0087e-06	0.709711	0.475	0.188	0.175688	MB.3	cdh11
dhx32b	1.0723e-05	0.604933	0.45	0.188	0.209119	MB.3	dhx32b
otx12	1.21814e-05	0.440115	0.275	0.082	0.237561	MB.3	otx1
dtx4a	1.51447e-05	0.631366	0.675	0.416	0.295351	MB.3	dtx4a
sdcbp2	1.58792e-05	0.782709	0.625	0.374	0.309677	MB.3	sdcbp2
zfhx42	1.98074e-05	0.68969	0.9	0.65	0.386284	MB.3	zfhx4
CABZ01092982.2	2.05008e-05	0.321704	0.275	0.084	0.399806	MB.3	CABZ01092982.2
si:ch211-156b7.4	2.37233e-05	0.273596	0.3	0.097	0.462651	MB.3	si:ch211-156b7.4
tiparp	3.75028e-05	0.306967	0.475	0.202	0.73138	MB.3	tiparp
celsr1b2	3.81716e-05	0.636782	0.85	0.657	0.744423	MB.3	celsr1b
fhdc2	4.41305e-05	0.309275	0.325	0.114	0.860634	MB.3	fhdc2
LO018154.1	5.62734e-05	0.322214	0.3	0.103	1	MB.3	LO018154.1
zfhx3	5.70378e-05	0.569533	0.65	0.366	1	MB.3	zfhx3
nfasca	6.84181e-05	0.769326	0.5	0.238	1	MB.3	nfasca
schip1	7.29708e-05	0.423282	0.55	0.286	1	MB.3	schip1
amot2	0.00010149	0.450423	0.775	0.439	1	MB.3	amot
her15.2	0.000105231	0.545384	0.45	0.207	1	MB.3	her15.2
pdgfbb1	0.000122947	0.267494	0.3	0.105	1	MB.3	pdgfbb
fbxl16	0.000127919	0.26213	0.25	0.081	1	MB.3	fbxl16
stra62	0.000138085	0.527637	0.25	0.083	1	MB.3	stra6
fam214a	0.000143671	0.726879	0.55	0.324	1	MB.3	fam214a
fgfr22	0.000143675	0.666161	0.925	0.815	1	MB.3	fgfr2
zgc:921071	0.000151851	0.5177	0.8	0.533	1	MB.3	zgc:92107
slit1a	0.000160353	0.37457	0.425	0.19	1	MB.3	slit1a
skia1	0.000162902	0.476635	0.9	0.62	1	MB.3	skia
gphna1	0.000171275	0.419006	0.5	0.259	1	MB.3	gphna
fer1l4	0.000182251	0.327912	0.35	0.141	1	MB.3	fer1l4
plxnb1b	0.000221803	0.574287	0.85	0.655	1	MB.3	plxnb1b
rnd3a	0.000226974	0.395014	0.675	0.371	1	MB.3	rnd3a
hmga2	0.000228301	0.556353	0.425	0.196	1	MB.3	hmga2
fam117bb	0.000260447	0.49145	0.375	0.168	1	MB.3	fam117bb
cstf1	0.000321592	0.297028	0.325	0.131	1	MB.3	cstf1
ptpn4b	0.000338266	0.326027	0.375	0.166	1	MB.3	ptpn4b
grin2db1	0.000355115	0.456059	0.125	0.028	1	MB.3	grin2db
fosl2	0.000398	0.551669	0.35	0.149	1	MB.3	fosl2
capza1a	0.000441062	0.348956	0.35	0.159	1	MB.3	capza1a
sipa1l1	0.000492508	0.507672	0.825	0.635	1	MB.3	sipa1l1
syne2b	0.00054284	0.378893	0.575	0.327	1	MB.3	syne2b
mbd3b1	0.000544474	0.52618	0.825	0.638	1	MB.3	mbd3b
jund	0.000548999	0.265023	0.2	0.065	1	MB.3	jund
otx2b2	0.000593457	0.303917	0.175	0.052	1	MB.3	otx2b
eppk1	0.000608946	0.336453	0.325	0.141	1	MB.3	eppk1
ulk2	0.000612294	0.317198	0.2	0.065	1	MB.3	ulk2
gas7a	0.000710468	0.446876	0.4	0.195	1	MB.3	gas7a
myl9b	0.000795567	0.39915	0.225	0.085	1	MB.3	myl9b
ece2b	0.000819252	0.317049	0.575	0.312	1	MB.3	ece2b
dchs1b	0.000878988	0.269835	0.4	0.185	1	MB.3	dchs1b
nav2a2	0.000922532	0.565395	0.65	0.426	1	MB.3	nav2a
ift81	0.000960555	0.346322	0.325	0.147	1	MB.3	ift81
zbtb16b2	0.00109878	0.639617	0.9	0.777	1	MB.3	zbtb16b
sox11a	0.00116718	0.644825	0.75	0.532	1	MB.3	sox11a
her21	0.00125253	0.464878	0.45	0.237	1	MB.3	her2
lrp2a1	0.00140097	0.41645	0.9	0.723	1	MB.3	lrp2a
tead1a	0.00151691	0.438618	0.85	0.694	1	MB.3	tead1a
rerea	0.00157711	0.36922	0.925	0.732	1	MB.3	rerea
tpm4a	0.00157773	0.510214	0.575	0.355	1	MB.3	tpm4a
usp54a	0.0016557	0.38538	0.65	0.444	1	MB.3	usp54a
BX005328.1	0.00166783	0.279488	0.2	0.07	1	MB.3	BX005328.1
rassf7a	0.00172538	0.367277	0.6	0.367	1	MB.3	rassf7a
pfkfb3	0.00176088	0.430861	0.3	0.138	1	MB.3	pfkfb3
dixdc1a	0.00182101	0.331801	0.2	0.073	1	MB.3	dixdc1a
tnrc6c2	0.00195206	0.372777	0.3	0.138	1	MB.3	tnrc6c2
crb2a2	0.00208694	0.527307	0.6	0.383	1	MB.3	crb2a
trps1	0.00213448	0.463363	0.9	0.795	1	MB.3	trps1
yap1	0.00215771	0.44481	0.775	0.617	1	MB.3	yap1
tiam1a1	0.00245033	0.465119	0.675	0.47	1	MB.3	tiam1a
fhdc1	0.00251974	0.308767	0.55	0.357	1	MB.3	fhdc1
dync1li1	0.00252977	0.275686	0.325	0.156	1	MB.3	dync1li1
zeb2a	0.00276153	0.351187	0.95	0.779	1	MB.3	zeb2a
reep3b	0.00281448	0.308103	0.575	0.376	1	MB.3	reep3b
slc7a7	0.00307155	0.33952	0.45	0.234	1	MB.3	slc7a7
wtip	0.0031183	0.286822	0.45	0.243	1	MB.3	wtip
SAMD51	0.00312706	0.501357	0.275	0.125	1	MB.3	SAMD5
brd7	0.00317406	0.31085	0.5	0.308	1	MB.3	brd7
cdc25b	0.00319051	0.33951	0.65	0.434	1	MB.3	cdc25b
slc9a3r1a	0.00331609	0.346961	0.325	0.162	1	MB.3	slc9a3r1a
rps27l	0.00350786	0.291069	0.35	0.179	1	MB.3	rps27l
sipa1l3	0.00351582	0.411467	0.725	0.58	1	MB.3	sipa1l3
fgfr32	0.00366428	0.552726	0.725	0.536	1	MB.3	fgfr3
tpm3	0.0037124	0.291665	0.625	0.418	1	MB.3	tpm3
rspo21	0.00373209	0.797379	0.2	0.079	1	MB.3	rspo2
bcor1	0.00385574	0.289932	0.525	0.309	1	MB.3	bcor
calr	0.00387082	0.267222	0.325	0.158	1	MB.3	calr
tns2a	0.0041482	0.494752	0.15	0.052	1	MB.3	tns2a
pvrl2l	0.00419817	0.503545	0.85	0.723	1	MB.3	pvrl2l
mdh1aa	0.00452554	0.253252	0.225	0.095	1	MB.3	mdh1aa
fat3a	0.00470809	0.29516	0.9	0.75	1	MB.3	fat3a
lmbr1	0.00479183	0.341564	0.35	0.186	1	MB.3	lmbr1
cd81a	0.00507429	0.35267	0.775	0.647	1	MB.3	cd81a
ssbp4	0.00551667	0.359789	0.9	0.732	1	MB.3	ssbp4
atxn1a	0.0055181	0.252821	0.2	0.081	1	MB.3	atxn1a
irx3b	0.00559745	0.324595	0.175	0.067	1	MB.3	irx3b
fat1a	0.00572689	0.402495	0.875	0.846	1	MB.3	fat1a
kmt2cb	0.00573745	0.313522	0.975	0.912	1	MB.3	kmt2cb
ubtfl	0.00573792	0.369618	0.45	0.275	1	MB.3	ubtfl
fosl1a	0.00596009	0.32484	0.3	0.148	1	MB.3	fosl1a
pim1	0.00648189	0.286436	0.575	0.355	1	MB.3	pim1
spopla	0.00648219	0.275138	0.35	0.188	1	MB.3	spopla
akap12b	0.0065352	0.502555	0.725	0.553	1	MB.3	akap12b
tp53	0.00657678	0.329739	0.4	0.231	1	MB.3	tp53
ankmy1	0.00660126	0.312294	0.3	0.143	1	MB.3	ankmy1
rassf2a	0.00686169	0.330676	0.6	0.415	1	MB.3	rassf2a
ppp1r10	0.00693641	0.393702	0.75	0.601	1	MB.3	ppp1r10
LO016987.2	0.00697991	0.313444	0.325	0.17	1	MB.3	LO016987.2
nabp1a	0.00713976	0.328709	0.575	0.408	1	MB.3	nabp1a
il6st	0.00721606	0.579933	0.425	0.264	1	MB.3	il6st
mllt10	0.00746972	0.302232	0.925	0.841	1	MB.3	mllt10
si:dkeyp-68b7.5	0.00751185	0.251299	0.4	0.229	1	MB.3	si:dkeyp-68b7.5
xpc	0.007537	0.339178	0.425	0.249	1	MB.3	xpc
slit2	0.00763376	0.469093	0.25	0.116	1	MB.3	slit2
celf3a	0.00785648	0.308386	0.55	0.36	1	MB.3	celf3a
slbp	0.00839916	0.310781	0.6	0.388	1	MB.3	slbp
arhgap29a	0.00863109	0.281761	0.65	0.428	1	MB.3	arhgap29a
fcho1	0.00890266	0.259349	0.425	0.239	1	MB.3	fcho1
jag2b2	0.00945193	0.349469	0.95	0.839	1	MB.3	jag2b
lrrn1	0.00947312	0.413414	0.475	0.311	1	MB.3	lrrn1
actb2	0.00949621	0.349256	0.675	0.517	1	MB.3	actb2
hsh2d	0.00995213	0.260383	0.25	0.118	1	MB.3	hsh2d
her11	8.97138e-77	0.73437	0.393	0.026	1.7496e-72	MHB.1	her11
dmbx1a1	2.04985e-63	0.911767	0.446	0.047	3.99762e-59	MHB.1	dmbx1a
cacnb3b	1.03832e-55	0.457486	0.339	0.029	2.02493e-51	MHB.1	cacnb3b
wnt1	8.94986e-55	0.888608	0.491	0.066	1.7454e-50	MHB.1	wnt1
wnt8b1	1.56145e-40	1.1949	0.652	0.177	3.04514e-36	MHB.1	wnt8b
wnt3a	8.33239e-37	0.974257	0.562	0.134	1.62498e-32	MHB.1	wnt3a
lmx1bb	1.43012e-36	1.42387	0.679	0.201	2.78903e-32	MHB.1	lmx1bb
pax7a	7.92149e-36	1.0474	0.554	0.124	1.54485e-31	MHB.1	pax7a
ndst2b2	1.1051e-34	0.985116	0.795	0.299	2.15516e-30	MHB.1	ndst2b
rbm33b	1.22678e-33	0.464004	0.286	0.036	2.39248e-29	MHB.1	rbm33b
zfpm2b2	4.50948e-33	0.566973	0.312	0.044	8.79439e-29	MHB.1	zfpm2b
otx13	2.50843e-31	0.537452	0.384	0.07	4.89194e-27	MHB.1	otx1
zfhx43	9.9025e-31	1.05777	0.964	0.639	1.93119e-26	MHB.1	zfhx4
dab1b	2.37171e-30	0.369744	0.25	0.031	4.62531e-26	MHB.1	dab1b
her5	4.5014e-30	0.341797	0.179	0.015	8.77864e-26	MHB.1	her5
ackr3a	2.75526e-29	0.253082	0.179	0.015	5.37332e-25	MHB.1	ackr3a
wnt3	8.84875e-29	1.34822	0.67	0.247	1.72568e-24	MHB.1	wnt3
mao	1.31915e-28	0.373409	0.152	0.011	2.57261e-24	MHB.1	mao
mab21l21	4.93089e-28	0.40929	0.232	0.029	9.61622e-24	MHB.1	mab21l2
cachd12	5.85893e-27	0.971079	0.964	0.775	1.14261e-22	MHB.1	cachd1
cnpy1	1.84535e-26	0.374442	0.223	0.028	3.5988e-22	MHB.1	cnpy1
otx2b3	1.95703e-26	0.401072	0.277	0.044	3.8166e-22	MHB.1	otx2b
si:dkey-112m2.11	2.55975e-26	1.11065	0.321	0.061	4.99203e-22	MHB.1	si:dkey-112m2.1
esamb	2.82402e-26	0.272277	0.152	0.012	5.5074e-22	MHB.1	esamb
en2b	2.16464e-24	0.749755	0.464	0.12	4.22149e-20	MHB.1	en2b
en2a	7.3199e-22	0.380784	0.232	0.037	1.42753e-17	MHB.1	en2a
col15a1b	3.26274e-21	0.785718	0.536	0.183	6.363e-17	MHB.1	col15a1b
igdcc31	1.00033e-20	0.673715	0.429	0.125	1.95085e-16	MHB.1	igdcc3
tenm31	2.26151e-19	0.792983	0.929	0.595	4.4104e-15	MHB.1	tenm3
tmem108	2.14828e-18	0.733164	0.768	0.385	4.18959e-14	MHB.1	tmem108
wls	4.41215e-18	0.712999	0.696	0.341	8.60458e-14	MHB.1	wls
vasna1	6.75115e-18	0.282004	0.214	0.038	1.31661e-13	MHB.1	vasna
cdon	8.23832e-18	0.792229	0.812	0.468	1.60664e-13	MHB.1	cdon
pdgfaa1	1.99216e-17	0.514473	0.304	0.076	3.8851e-13	MHB.1	pdgfaa
col4a6	2.62111e-17	0.785644	0.946	0.697	5.11169e-13	MHB.1	col4a6
efna5a	2.84459e-17	0.792408	0.804	0.485	5.54753e-13	MHB.1	efna5a
ephb4b	6.47408e-17	0.557652	0.527	0.208	1.26258e-12	MHB.1	ephb4b
gli31	7.18083e-17	0.805987	0.973	0.876	1.4004e-12	MHB.1	gli3
rspo22	9.62547e-17	0.602548	0.286	0.071	1.87716e-12	MHB.1	rspo2
FQ311928.1	1.02963e-16	0.730717	0.366	0.112	2.00799e-12	MHB.1	FQ311928.1
si:dkey-246i14.3	8.10669e-16	0.388021	0.259	0.06	1.58097e-11	MHB.1	si:dkey-246i14.3
dvl3b1	1.8066e-14	0.550314	0.473	0.193	3.52324e-10	MHB.1	dvl3b
gpc5a	5.86045e-14	0.437952	0.232	0.057	1.14291e-09	MHB.1	gpc5a
pax2a	6.45394e-14	1.32166	0.473	0.199	1.25865e-09	MHB.1	pax2a
BX908388.3	7.26371e-13	0.459694	0.446	0.177	1.41657e-08	MHB.1	BX908388.3
dnmt3bb.1	7.54043e-13	0.345946	0.277	0.08	1.47053e-08	MHB.1	dnmt3bb.1
wnt7ba1	8.75619e-13	0.337235	0.259	0.073	1.70763e-08	MHB.1	wnt7ba
unc5b1	1.11645e-12	0.747418	0.723	0.428	2.17731e-08	MHB.1	unc5b
tnfrsf191	1.86892e-12	0.72699	0.571	0.293	3.64477e-08	MHB.1	tnfrsf19
lamb1a1	2.0019e-12	0.458973	0.491	0.21	3.90411e-08	MHB.1	lamb1a
pax3a	2.76849e-12	0.793287	0.768	0.464	5.3991e-08	MHB.1	pax3a
tenm4	3.95941e-12	0.410712	0.982	0.768	7.72164e-08	MHB.1	tenm4
znrf31	6.42058e-12	0.646857	0.973	0.819	1.25214e-07	MHB.1	znrf3
cux1a	6.56269e-12	0.483617	0.705	0.377	1.27985e-07	MHB.1	cux1a
rapgef5b	1.28402e-11	0.279478	0.214	0.055	2.50409e-07	MHB.1	rapgef5b
gli2a2	2.46354e-11	0.552996	0.982	0.878	4.8044e-07	MHB.1	gli2a
pdgfbb2	2.95602e-11	0.319567	0.304	0.099	5.76483e-07	MHB.1	pdgfbb
mrtfbb	6.15566e-11	0.510049	0.241	0.073	1.20048e-06	MHB.1	mrtfbb
ngfb1	9.44039e-11	0.258626	0.152	0.033	1.84107e-06	MHB.1	ngfb
lef11	9.77263e-11	0.679834	0.491	0.234	1.90586e-06	MHB.1	lef1
otx2a3	1.09519e-10	0.317086	0.241	0.071	2.13584e-06	MHB.1	otx2a
gria3b1	1.14822e-10	0.439009	0.214	0.06	2.23926e-06	MHB.1	gria3b
si:dkey-12j5.1	2.88197e-10	0.519962	0.768	0.522	5.62043e-06	MHB.1	si:dkey-12j5.1
si:dkey-240h12.31	6.09065e-10	0.31073	0.259	0.085	1.1878e-05	MHB.1	si:dkey-240h12.3
exosc5	6.72311e-10	0.324646	0.455	0.21	1.31114e-05	MHB.1	exosc5
met1	6.94298e-10	0.406928	0.339	0.132	1.35402e-05	MHB.1	met
emc21	1.0299e-09	0.453701	0.607	0.352	2.00851e-05	MHB.1	emc2
cxxc5a	1.14038e-09	0.481003	0.5	0.246	2.22397e-05	MHB.1	cxxc5a
wu:fi36a10	2.89669e-09	0.326564	0.295	0.109	5.64913e-05	MHB.1	wu:fi36a10
ror1	4.18032e-09	0.549005	0.768	0.491	8.15246e-05	MHB.1	ror1
tfr1b	4.67665e-09	0.271353	0.277	0.101	9.1204e-05	MHB.1	tfr1b
si:ch211-267e7.3	4.87975e-09	0.33916	0.277	0.103	9.51649e-05	MHB.1	si:ch211-267e7.3
SAMD52	7.14882e-09	0.323044	0.304	0.119	0.000139416	MHB.1	SAMD5
ephb4a	7.58434e-09	0.548798	0.812	0.614	0.00014791	MHB.1	ephb4a
prmt3	1.02751e-08	0.307173	0.473	0.232	0.000200384	MHB.1	prmt3
mych	1.02982e-08	0.397817	0.429	0.211	0.000200836	MHB.1	mych
ctps1a	1.12516e-08	0.471413	0.884	0.679	0.000219429	MHB.1	ctps1a
gart	2.16666e-08	0.295346	0.393	0.181	0.000422543	MHB.1	gart
foxp43	2.26707e-08	0.434198	0.973	0.889	0.000442125	MHB.1	foxp4
igsf9a	2.44275e-08	0.657574	0.688	0.454	0.000476386	MHB.1	igsf9a
pkdcca1	2.45176e-08	0.258006	0.402	0.177	0.000478142	MHB.1	pkdcca
efna3b	2.50491e-08	0.717569	0.732	0.54	0.000488507	MHB.1	efna3b
tle3b1	2.59246e-08	0.478315	0.571	0.336	0.000505582	MHB.1	tle3b
col18a1a	4.93876e-08	0.561864	0.955	0.81	0.000963157	MHB.1	col18a1a
col4a5	5.78016e-08	0.519966	0.67	0.423	0.00112725	MHB.1	col4a5
dock11	6.64333e-08	0.330049	0.384	0.183	0.00129558	MHB.1	dock11
zgc:771582	6.98222e-08	0.518847	0.58	0.358	0.00136167	MHB.1	zgc:77158
eif3ea1	1.03242e-07	0.393028	0.83	0.616	0.00201342	MHB.1	eif3ea
si:dkey-49n23.1	1.32654e-07	0.371903	0.348	0.159	0.00258702	MHB.1	si:dkey-49n23.1
fam189a1	1.43165e-07	0.257568	0.393	0.184	0.00279201	MHB.1	fam189a1
pou2f2a.12	1.64605e-07	0.43812	0.393	0.188	0.00321012	MHB.1	pou2f2a.1
slc29a1a	2.19015e-07	0.388861	0.607	0.362	0.00427124	MHB.1	slc29a1a
skia2	2.27699e-07	0.411281	0.875	0.613	0.00444059	MHB.1	skia
kcnab1a	3.33966e-07	0.509242	0.33	0.151	0.00651301	MHB.1	kcnab1a
pprc1	4.8925e-07	0.408245	0.527	0.309	0.00954134	MHB.1	pprc1
hk2	5.2018e-07	0.435847	0.438	0.243	0.0101445	MHB.1	hk2
noc2l	5.24596e-07	0.395625	0.688	0.46	0.0102307	MHB.1	noc2l
large21	5.33876e-07	0.324003	0.643	0.393	0.0104117	MHB.1	large2
rpia	5.34745e-07	0.258258	0.357	0.17	0.0104286	MHB.1	rpia
hmcn2.1	5.79912e-07	0.292483	0.384	0.182	0.0113095	MHB.1	hmcn2.1
sema3aa1	6.86623e-07	0.279291	0.304	0.135	0.0133905	MHB.1	sema3aa
tiam2a1	1.04599e-06	0.376524	0.83	0.643	0.0203989	MHB.1	tiam2a
rbms1a	1.52741e-06	0.558846	0.411	0.23	0.0297876	MHB.1	rbms1a
nop56	1.71135e-06	0.352967	0.92	0.755	0.0333747	MHB.1	nop56
pwp2h	1.83485e-06	0.387193	0.768	0.552	0.0357832	MHB.1	pwp2h
nol6	1.92317e-06	0.316656	0.58	0.367	0.0375056	MHB.1	nol6
klf12b	2.05868e-06	0.41706	0.312	0.154	0.0401484	MHB.1	klf12b
pax5	2.35502e-06	0.361743	0.304	0.138	0.0459277	MHB.1	pax5
pdcd11	4.56445e-06	0.370268	0.598	0.421	0.0890159	MHB.1	pdcd11
arhgap36	5.56675e-06	0.291367	0.17	0.062	0.108563	MHB.1	arhgap36
il17rd	6.44335e-06	0.395974	0.491	0.292	0.125658	MHB.1	il17rd
aff21	6.46865e-06	0.492991	0.616	0.439	0.126152	MHB.1	aff2
sorl1	7.33242e-06	0.304487	0.464	0.281	0.142997	MHB.1	sorl1
itga9	7.61261e-06	0.464212	0.268	0.128	0.148461	MHB.1	itga9
sash1a	7.9193e-06	0.441116	0.607	0.439	0.154442	MHB.1	sash1a
hephl1a	8.01231e-06	0.285257	0.384	0.207	0.156256	MHB.1	hephl1a
sdc21	8.30951e-06	0.317304	0.464	0.281	0.162052	MHB.1	sdc2
plxna1a2	9.66069e-06	0.450932	0.768	0.576	0.188403	MHB.1	plxna1a
gcn1	9.90804e-06	0.316121	0.607	0.409	0.193227	MHB.1	gcn1
klhdc4	1.04754e-05	0.306789	0.33	0.176	0.204292	MHB.1	klhdc4
bop1	1.36261e-05	0.330617	0.732	0.562	0.265737	MHB.1	bop1
lmx1ba	1.81357e-05	0.364167	0.241	0.11	0.353682	MHB.1	lmx1ba
boc	1.92893e-05	0.374281	0.875	0.737	0.37618	MHB.1	boc
dph1	1.97286e-05	0.318743	0.562	0.375	0.384747	MHB.1	dph1
rbm28	2.02983e-05	0.396325	0.688	0.503	0.395857	MHB.1	rbm28
naca	2.15715e-05	0.32435	0.714	0.537	0.420688	MHB.1	naca
fbl	2.37207e-05	0.303398	0.545	0.362	0.462601	MHB.1	fbl
mycb	2.61761e-05	0.263334	0.25	0.119	0.510486	MHB.1	mycb
zgc:66433	2.67463e-05	0.298551	0.375	0.215	0.521607	MHB.1	zgc:66433
mapk1	2.96668e-05	0.451801	0.5	0.339	0.578562	MHB.1	mapk1
rplp0	3.01817e-05	0.281734	0.911	0.797	0.588603	MHB.1	rplp0
fras1	3.05851e-05	0.267386	0.393	0.215	0.596471	MHB.1	fras1
coq8aa	3.34529e-05	0.280227	0.527	0.337	0.652399	MHB.1	coq8aa
axin2	3.74126e-05	0.358769	0.536	0.373	0.729621	MHB.1	axin2
canx1	3.93917e-05	0.354363	0.688	0.555	0.768216	MHB.1	canx
zhx2a	4.10957e-05	0.326963	0.464	0.292	0.801448	MHB.1	zhx2a
prmt1	5.58328e-05	0.286608	0.714	0.508	1	MHB.1	prmt1
ptprn23	6.5088e-05	0.261138	0.741	0.532	1	MHB.1	ptprn2
nap1l1	6.79344e-05	0.255021	0.777	0.562	1	MHB.1	nap1l1
nrxn3a	6.80395e-05	0.499527	0.312	0.175	1	MHB.1	nrxn3a
ncl	6.83172e-05	0.287522	0.875	0.7	1	MHB.1	ncl
mybbp1a	7.36104e-05	0.344366	0.616	0.456	1	MHB.1	mybbp1a
atp1b3a	7.54134e-05	0.264663	0.357	0.204	1	MHB.1	atp1b3a
npm1a	8.22569e-05	0.365728	0.643	0.524	1	MHB.1	npm1a
wdr18	8.44628e-05	0.35268	0.777	0.641	1	MHB.1	wdr18
palld	9.51161e-05	0.348917	0.634	0.436	1	MHB.1	palld
arhgap21a1	0.000106837	0.304133	0.589	0.431	1	MHB.1	arhgap21a
myo9aa	0.000109637	0.397149	0.545	0.384	1	MHB.1	myo9aa
ek12	0.000144603	0.395423	0.375	0.218	1	MHB.1	ek1
ddx10	0.000150235	0.27049	0.429	0.274	1	MHB.1	ddx10
celf5a	0.000152122	0.436202	0.17	0.073	1	MHB.1	celf5a
hspd1	0.000153341	0.29618	0.429	0.27	1	MHB.1	hspd1
phf3	0.000153904	0.304598	0.429	0.271	1	MHB.1	phf3
gdf111	0.000181655	0.25381	0.393	0.237	1	MHB.1	gdf11
si:dkey-239h2.3	0.000187243	0.268188	0.705	0.529	1	MHB.1	si:dkey-239h2.3
efna2a1	0.000199689	0.388246	0.741	0.569	1	MHB.1	efna2a
chd4b	0.000207508	0.33067	0.902	0.788	1	MHB.1	chd4b
ddx18	0.00021109	0.320895	0.795	0.653	1	MHB.1	ddx18
mllt101	0.000242052	0.25762	0.92	0.838	1	MHB.1	mllt10
lrpprc	0.000267262	0.263729	0.571	0.413	1	MHB.1	lrpprc
spsb4a	0.00028048	0.457088	0.67	0.551	1	MHB.1	spsb4a
lrba	0.000325857	0.26802	0.321	0.189	1	MHB.1	lrba
caskin1	0.000385002	0.302634	0.402	0.254	1	MHB.1	caskin1
snd1	0.000388222	0.323399	0.875	0.835	1	MHB.1	snd1
soga1	0.000449429	0.273347	0.527	0.363	1	MHB.1	soga1
nme2b.1	0.000546775	0.279771	0.464	0.315	1	MHB.1	nme2b.1
ptprua	0.000550793	0.513207	0.232	0.124	1	MHB.1	ptprua
zeb1b	0.00060569	0.310681	0.866	0.792	1	MHB.1	zeb1b
pax2b	0.000760666	0.252956	0.196	0.097	1	MHB.1	pax2b
rpl3	0.000980765	0.282889	0.857	0.721	1	MHB.1	rpl3
rpl22l1	0.00114346	0.261103	0.518	0.379	1	MHB.1	rpl22l1
gpc6a1	0.00115159	0.308122	0.438	0.309	1	MHB.1	gpc6a
ctnnb11	0.00125793	0.256199	0.83	0.648	1	MHB.1	ctnnb1
adcy6b	0.00144945	0.321414	0.339	0.223	1	MHB.1	adcy6b
dnttip2	0.0014755	0.322702	0.42	0.292	1	MHB.1	dnttip2
enox2	0.00167907	0.300248	0.491	0.353	1	MHB.1	enox2
rpl12	0.00174008	0.262647	0.732	0.582	1	MHB.1	rpl12
gmps	0.00205051	0.301763	0.616	0.5	1	MHB.1	gmps
ptprnb1	0.00228237	0.302654	0.625	0.497	1	MHB.1	ptprnb
map3k22	0.0024801	0.253446	0.205	0.116	1	MHB.1	map3k22
igf1rb	0.00272338	0.263819	0.661	0.54	1	MHB.1	igf1rb
tyw1	0.00360772	0.256927	0.589	0.449	1	MHB.1	tyw1
kpnb3	0.00387611	0.299112	0.634	0.514	1	MHB.1	kpnb3
slc38a5b	0.00558591	0.262339	0.661	0.55	1	MHB.1	slc38a5b
wdr36	0.00590103	0.272575	0.643	0.544	1	MHB.1	wdr36
agrn	0.00713932	0.358578	0.955	0.883	1	MHB.1	agrn
tnikb	0.00801717	0.282357	0.616	0.527	1	MHB.1	tnikb
ccne2	0.00849253	0.301235	0.536	0.405	1	MHB.1	ccne2
pax51	2.26271e-79	1.97846	0.771	0.117	4.41274e-75	MHB.2	pax5
en2b1	6.49043e-77	1.5054	0.733	0.109	1.26576e-72	MHB.2	en2b
lmx1bb1	9.8568e-47	1.31649	0.771	0.198	1.92227e-42	MHB.2	lmx1bb
en2a1	5.66266e-44	0.620576	0.324	0.033	1.10433e-39	MHB.2	en2a
pax2a1	2.70677e-43	1.87913	0.714	0.189	5.27874e-39	MHB.2	pax2a
il17rd1	7.87499e-39	1.09705	0.829	0.277	1.53578e-34	MHB.2	il17rd
frmpd3	9.55121e-30	0.699096	0.4	0.078	1.86268e-25	MHB.2	frmpd3
ppap2d	1.00946e-26	0.641268	0.476	0.117	1.96865e-22	MHB.2	ppap2d
pkdcca2	2.11784e-24	0.718556	0.562	0.17	4.1302e-20	MHB.2	pkdcca
pax2b1	1.1757e-23	0.868979	0.39	0.088	2.29286e-19	MHB.2	pax2b
si:ch211-284f22.3	7.03646e-19	0.804191	0.648	0.28	1.37225e-14	MHB.2	si:ch211-284f22.3
efna5a1	5.23169e-18	0.897169	0.829	0.485	1.02028e-13	MHB.2	efna5a
jag2b3	8.20215e-17	0.780635	0.971	0.835	1.59958e-12	MHB.2	jag2b
dachc	1.65687e-16	0.424954	0.305	0.075	3.23124e-12	MHB.2	dachc
fras11	2.96658e-16	0.723995	0.524	0.209	5.78543e-12	MHB.2	fras1
lmx1ba1	4.9395e-15	0.663314	0.352	0.106	9.633e-11	MHB.2	lmx1ba
fam189a11	1.22584e-14	0.63385	0.476	0.181	2.39064e-10	MHB.2	fam189a1
mdkb	3.63383e-14	0.579498	0.657	0.329	7.08669e-10	MHB.2	mdkb
cxxc5a1	5.43068e-14	0.599161	0.562	0.244	1.05909e-09	MHB.2	cxxc5a
slc1a3a	6.3976e-14	0.503913	0.571	0.255	1.24766e-09	MHB.2	slc1a3a
gas7a1	6.8056e-14	0.496538	0.486	0.185	1.32723e-09	MHB.2	gas7a
trim2b	1.07941e-13	0.324772	0.286	0.078	2.10506e-09	MHB.2	trim2b
wnt31	1.08605e-13	1.05535	0.543	0.254	2.11801e-09	MHB.2	wnt3
rbfox3a	8.33278e-13	0.614461	0.486	0.207	1.62506e-08	MHB.2	rbfox3a
wnt8b2	8.80685e-13	0.699906	0.457	0.188	1.71751e-08	MHB.2	wnt8b
plxdc21	1.42376e-12	0.7545	0.848	0.603	2.77662e-08	MHB.2	plxdc2
flrt3	1.78017e-12	0.506644	0.552	0.252	3.47168e-08	MHB.2	flrt3
rbm33b1	2.0891e-12	0.319006	0.19	0.041	4.07417e-08	MHB.2	rbm33b
sdk2a	2.29689e-12	0.286039	0.124	0.019	4.4794e-08	MHB.2	sdk2a
ptprn24	2.30925e-12	0.633323	0.848	0.528	4.5035e-08	MHB.2	ptprn2
CR356242.1	2.36295e-12	0.446397	0.362	0.122	4.60823e-08	MHB.2	CR356242.1
cpm	4.21326e-12	0.373288	0.305	0.096	8.21669e-08	MHB.2	cpm
fgf8b	9.30631e-12	0.262674	0.143	0.026	1.81492e-07	MHB.2	fgf8b
pax7a1	1.44521e-11	0.703582	0.371	0.134	2.81844e-07	MHB.2	pax7a
klhl14	2.2551e-11	0.251534	0.133	0.023	4.3979e-07	MHB.2	klhl14
nrp2a	3.41862e-11	0.349939	0.257	0.075	6.66699e-07	MHB.2	nrp2a
BX908388.31	3.50886e-11	0.389623	0.438	0.178	6.84298e-07	MHB.2	BX908388.3
boc1	1.49583e-10	0.526168	0.962	0.734	2.91717e-06	MHB.2	boc
samd11	1.72202e-10	0.39242	0.381	0.151	3.35829e-06	MHB.2	samd11
ptprna	1.96086e-10	0.623175	0.705	0.425	3.82406e-06	MHB.2	ptprna
hephl1a1	2.90184e-10	0.515501	0.448	0.205	5.65917e-06	MHB.2	hephl1a
kif21b	3.43324e-10	0.4708	0.467	0.21	6.69551e-06	MHB.2	kif21b
mef2aa	5.48697e-10	0.409893	0.448	0.199	1.07007e-05	MHB.2	mef2aa
lama5	7.2905e-10	0.481586	0.371	0.154	1.42179e-05	MHB.2	lama5
cdon1	9.87708e-10	0.776035	0.724	0.473	1.92623e-05	MHB.2	cdon
zic2a	1.21014e-09	0.425563	0.362	0.146	2.36001e-05	MHB.2	zic2a
vegfaa	1.72933e-09	0.262467	0.21	0.06	3.37254e-05	MHB.2	vegfaa
tenm41	2.01403e-09	0.328685	0.971	0.769	3.92775e-05	MHB.2	tenm4
fzd10	2.35913e-09	0.363382	0.343	0.138	4.60077e-05	MHB.2	fzd10
sema3fa	2.57792e-09	0.460213	0.333	0.128	5.02746e-05	MHB.2	sema3fa
zfhx44	2.73713e-09	0.614103	0.838	0.646	5.33796e-05	MHB.2	zfhx4
kcnab1a1	3.61161e-09	0.563132	0.362	0.15	7.04336e-05	MHB.2	kcnab1a
cep131	1.56397e-08	0.417938	0.667	0.4	0.000305005	MHB.2	cep131
casz1	1.68645e-08	0.462761	0.257	0.092	0.000328892	MHB.2	casz1
tead1a1	2.07707e-08	0.507607	0.867	0.689	0.00040507	MHB.2	tead1a
aff22	3.61886e-08	0.448955	0.705	0.435	0.000705749	MHB.2	aff2
vdrb	4.38567e-08	0.684606	0.695	0.475	0.000855294	MHB.2	vdrb
adgrl3.1	5.93239e-08	0.46208	0.6	0.363	0.00115693	MHB.2	adgrl3.1
wls1	7.09907e-08	0.47868	0.581	0.347	0.00138446	MHB.2	wls
col18a1a1	8.20463e-08	0.603062	0.924	0.811	0.00160007	MHB.2	col18a1a
pleca	9.46251e-08	0.478983	0.638	0.381	0.00184538	MHB.2	pleca
zgc:110425	1.06627e-07	0.28503	0.41	0.192	0.00207945	MHB.2	zgc:110425
pknox2	1.10374e-07	0.382458	0.467	0.248	0.00215251	MHB.2	pknox2
negr1	1.91526e-07	0.447818	0.905	0.712	0.00373514	MHB.2	negr1
ism1	3.11509e-07	0.279742	0.124	0.031	0.00607505	MHB.2	ism1
etv4	3.23606e-07	0.436895	0.352	0.166	0.00631096	MHB.2	etv4
kirrel3l	3.49523e-07	0.356102	0.743	0.458	0.0068164	MHB.2	kirrel3l
gli2a3	3.53035e-07	0.41765	0.99	0.878	0.0068849	MHB.2	gli2a
zbtb16a1	3.87192e-07	0.368765	0.99	0.915	0.00755102	MHB.2	zbtb16a
unc5b2	4.24033e-07	0.36805	0.705	0.43	0.00826949	MHB.2	unc5b
prkd2	4.80466e-07	0.282921	0.371	0.178	0.00937005	MHB.2	prkd2
si:dkey-22o22.2	5.40743e-07	0.400791	0.162	0.05	0.0105456	MHB.2	si:dkey-22o22.2
scube2	7.11641e-07	0.368187	0.629	0.38	0.0138784	MHB.2	scube2
ext1a	1.19827e-06	0.519288	0.714	0.532	0.0233686	MHB.2	ext1a
xpc1	1.34843e-06	0.340601	0.448	0.243	0.0262971	MHB.2	xpc
arhgap29a1	1.39213e-06	0.364596	0.648	0.422	0.0271494	MHB.2	arhgap29a
spry4	1.44985e-06	0.338481	0.41	0.21	0.028275	MHB.2	spry4
tenm32	1.55907e-06	0.411693	0.781	0.603	0.030405	MHB.2	tenm3
spry2	1.6582e-06	0.306779	0.371	0.19	0.0323382	MHB.2	spry2
hif1an	1.77247e-06	0.298581	0.381	0.192	0.0345667	MHB.2	hif1an
cited4a	2.06294e-06	0.363981	0.4	0.21	0.0402315	MHB.2	cited4a
zgc:173585	2.21314e-06	0.26457	0.257	0.109	0.0431607	MHB.2	zgc:173585
tns1b	3.03493e-06	0.33181	0.476	0.274	0.0591873	MHB.2	tns1b
nr2f6b	3.28294e-06	0.459833	0.381	0.21	0.0640239	MHB.2	nr2f6b
aifm3	3.97405e-06	0.365834	0.2	0.078	0.0775019	MHB.2	aifm3
tfap4	3.9879e-06	0.373524	0.819	0.636	0.0777719	MHB.2	tfap4
tpm4a1	4.03348e-06	0.526379	0.552	0.349	0.0786608	MHB.2	tpm4a
srgap1a	4.07097e-06	0.384538	0.848	0.698	0.079392	MHB.2	srgap1a
col14a1a	4.6687e-06	0.652174	0.381	0.208	0.0910491	MHB.2	col14a1a
znrf32	4.873e-06	0.407451	0.924	0.822	0.0950333	MHB.2	znrf3
ZNF4231	4.9842e-06	0.550724	0.657	0.478	0.0972019	MHB.2	ZNF423
efnb2b1	5.82239e-06	0.369374	0.638	0.432	0.113548	MHB.2	efnb2b
sdc41	6.50003e-06	0.310754	0.714	0.475	0.126764	MHB.2	sdc4
si:dkey-112m2.12	8.36857e-06	0.295858	0.181	0.068	0.163204	MHB.2	si:dkey-112m2.1
rpf1	8.45299e-06	0.267882	0.667	0.429	0.16485	MHB.2	rpf1
rexo4	8.47672e-06	0.260975	0.352	0.181	0.165313	MHB.2	rexo4
mapk11	8.76024e-06	0.379064	0.533	0.338	0.170842	MHB.2	mapk1
afdna1	9.69547e-06	0.414182	0.924	0.798	0.189081	MHB.2	afdna
ror11	9.86593e-06	0.391565	0.705	0.495	0.192405	MHB.2	ror1
dusp19b	1.03515e-05	0.513393	0.762	0.633	0.201875	MHB.2	dusp19b
tacc3	1.2546e-05	0.301189	0.429	0.239	0.244673	MHB.2	tacc3
srsf2a	1.51443e-05	0.302989	0.495	0.307	0.295343	MHB.2	srsf2a
znf106b	1.77968e-05	0.339293	0.457	0.285	0.347074	MHB.2	znf106b
angptl4	1.82384e-05	0.475362	0.362	0.204	0.355686	MHB.2	angptl4
cobl	1.82743e-05	0.302948	0.4	0.224	0.356386	MHB.2	cobl
auts2a	1.98702e-05	0.391474	0.676	0.503	0.387509	MHB.2	auts2a
pou3f3b1	2.127e-05	0.258866	0.457	0.269	0.414808	MHB.2	pou3f3b
stat31	2.28687e-05	0.428011	0.733	0.556	0.445986	MHB.2	stat3
cenpe	2.49474e-05	0.297142	0.524	0.325	0.486525	MHB.2	cenpe
top2a	2.76961e-05	0.324246	0.629	0.449	0.540129	MHB.2	top2a
si:dkey-102m7.3	2.98598e-05	0.315378	0.581	0.385	0.582325	MHB.2	si:dkey-102m7.3
slc29a1a1	3.11611e-05	0.296247	0.562	0.365	0.607704	MHB.2	slc29a1a
CABZ01058261.1	3.1934e-05	0.284227	0.562	0.361	0.622777	MHB.2	CABZ01058261.1
ankmy11	3.47155e-05	0.393338	0.276	0.14	0.677022	MHB.2	ankmy1
pard6gb	3.89271e-05	0.334504	0.6	0.395	0.759157	MHB.2	pard6gb
mdka2	4.34038e-05	0.361408	0.714	0.511	0.846462	MHB.2	mdka
gulp1a	5.06123e-05	0.269945	0.457	0.274	0.98704	MHB.2	gulp1a
srgap3	5.30398e-05	0.449929	0.657	0.551	1	MHB.2	srgap3
hk21	5.82151e-05	0.286301	0.41	0.245	1	MHB.2	hk2
lima1a	6.04285e-05	0.364889	0.505	0.319	1	MHB.2	lima1a
crb2a3	6.70131e-05	0.54253	0.533	0.38	1	MHB.2	crb2a
lef12	6.88572e-05	0.53687	0.39	0.239	1	MHB.2	lef1
efnb2a	8.06972e-05	0.292159	0.362	0.205	1	MHB.2	efnb2a
zic2b1	8.60805e-05	0.255091	0.457	0.278	1	MHB.2	zic2b
ptprnb2	0.000106847	0.320866	0.667	0.496	1	MHB.2	ptprnb
cbx7a1	0.000118126	0.259541	0.314	0.164	1	MHB.2	cbx7a
chrm4a1	0.000126496	0.269227	0.286	0.151	1	MHB.2	chrm4a
dusp6	0.000130519	0.262572	0.333	0.185	1	MHB.2	dusp6
acsbg2	0.00014399	0.29843	0.229	0.11	1	MHB.2	acsbg2
sb:cb81	0.000149922	0.337071	0.61	0.445	1	MHB.2	sb:cb81
mex3b1	0.000153028	0.292735	0.562	0.373	1	MHB.2	mex3b
BX784025.1	0.000172507	0.273419	0.267	0.142	1	MHB.2	BX784025.1
nxn	0.000176667	0.355543	0.676	0.498	1	MHB.2	nxn
mllt102	0.000190894	0.299902	0.933	0.838	1	MHB.2	mllt10
spred2a	0.000193403	0.387626	0.562	0.399	1	MHB.2	spred2a
anp32a	0.000225781	0.256881	0.619	0.464	1	MHB.2	anp32a
cachd13	0.000241741	0.293728	0.905	0.779	1	MHB.2	cachd1
rps6	0.000270614	0.27441	0.733	0.641	1	MHB.2	rps6
oxct1a	0.000281189	0.328845	0.486	0.316	1	MHB.2	oxct1a
pou2f2a.13	0.000295579	0.262353	0.333	0.191	1	MHB.2	pou2f2a.1
dbf4b	0.000299919	0.254276	0.39	0.241	1	MHB.2	dbf4b
mat2ab	0.000333428	0.291828	0.343	0.205	1	MHB.2	mat2ab
gli32	0.000334965	0.306076	0.971	0.876	1	MHB.2	gli3
suclg2	0.000381805	0.27128	0.438	0.293	1	MHB.2	suclg2
fgfr1a	0.000442846	0.276208	0.752	0.594	1	MHB.2	fgfr1a
s1pr2	0.000442914	0.305996	0.571	0.41	1	MHB.2	s1pr2
arrb2b	0.000462679	0.257909	0.4	0.256	1	MHB.2	arrb2b
sox13	0.000465909	0.256743	0.79	0.606	1	MHB.2	sox13
rab11fip4a	0.000469079	0.393232	0.343	0.217	1	MHB.2	rab11fip4a
ccna2	0.000487392	0.258585	0.429	0.286	1	MHB.2	ccna2
sipa1l21	0.000532853	0.339389	0.8	0.651	1	MHB.2	sipa1l2
ppp1r101	0.00072316	0.276633	0.762	0.596	1	MHB.2	ppp1r10
xylt11	0.000756237	0.268678	0.705	0.545	1	MHB.2	xylt1
zcchc7	0.000767987	0.256196	0.695	0.544	1	MHB.2	zcchc7
coro1ca	0.000928399	0.426424	0.771	0.629	1	MHB.2	coro1ca
CABZ01048666.1	0.000974239	0.270739	0.248	0.136	1	MHB.2	CABZ01048666.1
fosl21	0.000978965	0.423379	0.257	0.147	1	MHB.2	fosl2
elf1	0.000990683	0.300545	0.295	0.171	1	MHB.2	elf1
spred2b	0.00106045	0.288536	0.705	0.534	1	MHB.2	spred2b
CU459056.1	0.00112042	0.284701	0.352	0.224	1	MHB.2	CU459056.1
dtx4a1	0.0012317	0.291998	0.552	0.414	1	MHB.2	dtx4a
foxp44	0.00128858	0.355783	0.924	0.892	1	MHB.2	foxp4
dnajb1a	0.0017283	0.279718	0.4	0.276	1	MHB.2	dnajb1a
abca3b	0.00176763	0.359297	0.381	0.255	1	MHB.2	abca3b
pot1	0.0019544	0.259353	0.371	0.254	1	MHB.2	pot1
plxna2	0.00220577	0.407364	0.39	0.268	1	MHB.2	plxna2
cdc14b	0.00226509	0.347693	0.667	0.546	1	MHB.2	cdc14b
actb21	0.00278762	0.27096	0.619	0.515	1	MHB.2	actb2
plxna1a3	0.00290151	0.289053	0.686	0.58	1	MHB.2	plxna1a
si:ch211-13k12.2	0.00319574	0.25171	0.6	0.468	1	MHB.2	si:ch211-13k12.2
fign	0.003347	0.322079	0.638	0.535	1	MHB.2	fign
axin21	0.00380739	0.27128	0.495	0.376	1	MHB.2	axin2
si:ch211-286o17.11	0.00402315	0.285866	0.495	0.362	1	MHB.2	si:ch211-286o17.1
efna2a2	0.00426804	0.57392	0.657	0.573	1	MHB.2	efna2a
2023-09-12	0.0043213	0.25868	0.59	0.469	1	MHB.2	2023-09-12
emc22	0.00440602	0.287239	0.476	0.359	1	MHB.2	emc2
cldn5a1	0.00471784	0.335553	0.571	0.46	1	MHB.2	cldn5a
serinc5	0.00493964	0.2969	0.705	0.599	1	MHB.2	serinc5
brdt1	0.00514785	0.352116	0.724	0.648	1	MHB.2	brdt
NAV1	0.0056282	0.334516	0.629	0.471	1	MHB.2	NAV1
lfng	0.008237	0.273391	0.752	0.609	1	MHB.2	lfng
zgc:92242	0.00900451	0.252121	0.41	0.301	1	MHB.2	zgc:92242
en2b2	3.05094e-57	1.61643	0.731	0.116	5.94994e-53	MHB.3	en2b
pax52	4.04936e-49	2.01421	0.705	0.127	7.89706e-45	MHB.3	pax5
pax2a2	3.01693e-45	1.76105	0.821	0.192	5.88362e-41	MHB.3	pax2a
wnt11	1.0435e-40	1.00143	0.5	0.072	2.03504e-36	MHB.3	wnt1
fgf22	6.59509e-40	0.752297	0.282	0.022	1.28617e-35	MHB.3	fgf22
pdgfbb3	2.31044e-39	0.977999	0.551	0.094	4.50582e-35	MHB.3	pdgfbb
her51	4.22674e-36	0.394867	0.231	0.016	8.243e-32	MHB.3	her5
prom1b	1.43854e-34	0.40002	0.282	0.026	2.80544e-30	MHB.3	prom1b
pax2b2	1.10519e-29	1.42138	0.474	0.089	2.15534e-25	MHB.3	pax2b
her111	1.38399e-25	0.460469	0.282	0.036	2.69906e-21	MHB.3	her11
otx14	2.0875e-23	0.486846	0.397	0.075	4.07105e-19	MHB.3	otx1
gria3b2	2.11168e-23	0.555144	0.346	0.058	4.11819e-19	MHB.3	gria3b
lmx1bb2	2.72265e-23	1.1587	0.679	0.208	5.30972e-19	MHB.3	lmx1bb
rbm33b2	9.45916e-21	0.479391	0.269	0.04	1.84472e-16	MHB.3	rbm33b
irx7	1.43245e-20	0.455473	0.282	0.044	2.79357e-16	MHB.3	irx7
otx2a4	3.22467e-20	0.467376	0.359	0.07	6.28875e-16	MHB.3	otx2a
il17rd2	5.07577e-20	1.09275	0.705	0.287	9.89876e-16	MHB.3	il17rd
en2a2	2.94734e-19	0.346989	0.256	0.039	5.74791e-15	MHB.3	en2a
klhl141	3.35168e-19	0.342099	0.192	0.023	6.53645e-15	MHB.3	klhl14
dmbx1a2	5.76231e-15	0.403068	0.282	0.058	1.12377e-10	MHB.3	dmbx1a
nav2b1	7.35326e-15	0.833763	0.718	0.378	1.43403e-10	MHB.3	nav2b
flrt31	1.46679e-13	0.665077	0.603	0.254	2.86053e-09	MHB.3	flrt3
sox21a	3.5271e-13	0.501702	0.385	0.115	6.87856e-09	MHB.3	sox21a
zgc:153372	4.92662e-13	0.26333	0.179	0.029	9.60789e-09	MHB.3	zgc:153372
zfhx45	3.16263e-12	0.659088	0.962	0.644	6.16776e-08	MHB.3	zfhx4
gas7a2	3.57561e-11	0.504085	0.487	0.188	6.97316e-07	MHB.3	gas7a
polrmt	1.67955e-10	0.740919	0.551	0.276	3.27547e-06	MHB.3	polrmt
ptprn25	4.22134e-10	0.541164	0.872	0.531	8.23246e-06	MHB.3	ptprn2
ndst2b3	4.46029e-10	0.55097	0.628	0.312	8.69846e-06	MHB.3	ndst2b
atxn1a1	1.55247e-09	0.30925	0.269	0.076	3.02763e-05	MHB.3	atxn1a
s1pr21	3.47373e-09	0.56717	0.679	0.408	6.77447e-05	MHB.3	s1pr2
foxp45	9.12565e-09	0.548818	0.962	0.891	0.000177968	MHB.3	foxp4
znrf33	1.1311e-08	0.604864	0.91	0.823	0.000220586	MHB.3	znrf3
mapk12	1.35672e-08	0.602025	0.615	0.338	0.000264588	MHB.3	mapk1
cachd14	2.02473e-08	0.579827	0.923	0.779	0.000394864	MHB.3	cachd1
wnt32	2.18309e-08	0.758278	0.526	0.258	0.000425747	MHB.3	wnt3
cnpy11	2.74786e-08	0.292477	0.154	0.033	0.000535888	MHB.3	cnpy1
plxnb2a.1	4.12539e-08	0.306038	0.244	0.074	0.000804533	MHB.3	plxnb2a.1
CABZ01041610.1	5.14971e-08	0.250401	0.141	0.029	0.0010043	MHB.3	CABZ01041610.1
sall3b2	5.38789e-08	0.290658	0.231	0.068	0.00105075	MHB.3	sall3b
abcb51	6.7461e-08	0.659885	0.526	0.267	0.00131562	MHB.3	abcb5
zgc:174888	7.44387e-08	0.282163	0.231	0.068	0.0014517	MHB.3	zgc:174888
si:ch211-207i1.2	1.47408e-07	0.417398	0.5	0.242	0.00287475	MHB.3	si:ch211-207i1.2
nr1d2a	3.39221e-07	0.263108	0.218	0.067	0.00661549	MHB.3	nr1d2a
fgf18b	3.79827e-07	0.250691	0.205	0.061	0.00740739	MHB.3	fgf18b
fras12	6.95954e-07	0.505776	0.436	0.216	0.0135725	MHB.3	fras1
ppap2d1	7.38904e-07	0.359839	0.321	0.127	0.0144101	MHB.3	ppap2d
adam15	9.69636e-07	0.333514	0.282	0.106	0.0189098	MHB.3	adam15
efna5a2	1.04924e-06	0.642127	0.731	0.493	0.0204623	MHB.3	efna5a
SIPA11	1.0551e-06	0.382405	0.385	0.172	0.0205766	MHB.3	SIPA1
lmx1ba2	1.39018e-06	0.55926	0.282	0.111	0.0271113	MHB.3	lmx1ba
ephb4b1	1.58987e-06	0.38706	0.436	0.216	0.0310056	MHB.3	ephb4b
CU459056.11	2.22813e-06	0.390337	0.449	0.223	0.0434531	MHB.3	CU459056.1
slc35f11	2.43646e-06	0.56562	0.295	0.122	0.0475158	MHB.3	slc35f1
ldb2a	2.73854e-06	0.451958	0.372	0.178	0.053407	MHB.3	ldb2a
cxcl12b	2.77439e-06	0.305603	0.141	0.036	0.0541062	MHB.3	cxcl12b
znf5361	6.04837e-06	0.480836	0.295	0.123	0.117955	MHB.3	znf536
kif5c2	6.34367e-06	0.298136	0.192	0.063	0.123714	MHB.3	kif5c
SAMD53	6.38596e-06	0.265699	0.295	0.122	0.124539	MHB.3	SAMD5
hs3st3b1b1	1.0071e-05	0.510305	0.718	0.502	0.196405	MHB.3	hs3st3b1b
mllt103	1.40347e-05	0.387793	0.923	0.839	0.273705	MHB.3	mllt10
msi2b	1.58403e-05	0.522511	0.731	0.55	0.308917	MHB.3	msi2b
gdf112	1.89178e-05	0.454852	0.449	0.237	0.368935	MHB.3	gdf11
sb:cb811	2.00498e-05	0.463936	0.654	0.446	0.39101	MHB.3	sb:cb81
ntn1b1	3.51274e-05	0.652585	0.333	0.169	0.685054	MHB.3	ntn1b
lipeb	3.78041e-05	0.574206	0.333	0.167	0.737256	MHB.3	lipeb
arhgef10	3.93076e-05	0.439239	0.41	0.227	0.766577	MHB.3	arhgef10
ripor11	6.611e-05	0.462671	0.744	0.589	1	MHB.3	ripor1
dgkh	6.65712e-05	0.388605	0.513	0.308	1	MHB.3	dgkh
eif4ebp3l	6.85486e-05	0.265462	0.397	0.204	1	MHB.3	eif4ebp3l
si:dkey-246i14.31	7.38853e-05	0.282728	0.179	0.066	1	MHB.3	si:dkey-246i14.3
adgrv11	7.82527e-05	0.421051	0.859	0.769	1	MHB.3	adgrv1
dock32	9.3692e-05	0.407437	0.282	0.134	1	MHB.3	dock3
pde4bb	0.000113083	0.408551	0.346	0.19	1	MHB.3	pde4bb
chmp6b1	0.000113924	0.337186	0.321	0.16	1	MHB.3	chmp6b
skia3	0.000136726	0.401598	0.795	0.619	1	MHB.3	skia
amot3	0.000149666	0.374453	0.641	0.438	1	MHB.3	amot
lima1a1	0.000197723	0.302456	0.526	0.321	1	MHB.3	lima1a
vdrb1	0.000231582	0.443499	0.615	0.48	1	MHB.3	vdrb
rpl38	0.000265481	0.306287	0.833	0.681	1	MHB.3	rpl38
sdc42	0.000267988	0.41368	0.667	0.479	1	MHB.3	sdc4
rpl7a	0.000367889	0.318723	0.795	0.672	1	MHB.3	rpl7a
arid5b	0.000399579	0.300687	0.397	0.227	1	MHB.3	arid5b
bop11	0.000466253	0.360118	0.731	0.565	1	MHB.3	bop1
wnt8b3	0.000520293	0.411401	0.346	0.195	1	MHB.3	wnt8b
emc23	0.000524428	0.380024	0.513	0.359	1	MHB.3	emc2
palld1	0.000550994	0.460274	0.603	0.44	1	MHB.3	palld
pold1	0.000731091	0.263486	0.372	0.207	1	MHB.3	pold1
PKN2	0.000751196	0.250212	0.321	0.173	1	MHB.3	PKN2
serpinh1b	0.000788833	0.386253	0.641	0.469	1	MHB.3	serpinh1b
ccne21	0.000881974	0.38154	0.603	0.404	1	MHB.3	ccne2
rnf220a1	0.000939638	0.413434	0.705	0.551	1	MHB.3	rnf220a
snd11	0.000959246	0.296823	0.872	0.835	1	MHB.3	snd1
rplp2l	0.000961567	0.291153	0.808	0.728	1	MHB.3	rplp2l
ptch21	0.0010427	0.421952	0.462	0.308	1	MHB.3	ptch2
ebf3a2	0.0012197	0.586541	0.244	0.125	1	MHB.3	ebf3a
stag1a	0.00129271	0.343658	0.603	0.439	1	MHB.3	stag1a
ntn1a2	0.00135472	0.50172	0.615	0.441	1	MHB.3	ntn1a
kcnab1a2	0.00149151	0.332895	0.282	0.155	1	MHB.3	kcnab1a
zgc:110796	0.00169528	0.257101	0.603	0.431	1	MHB.3	zgc:110796
pabpc1a	0.00185805	0.256522	0.91	0.86	1	MHB.3	pabpc1a
rpl36	0.00193682	0.321826	0.782	0.7	1	MHB.3	rpl36
crb2a4	0.00227954	0.340317	0.526	0.382	1	MHB.3	crb2a
rabgap1l	0.00242069	0.258674	0.308	0.177	1	MHB.3	rabgap1l
cbx7a2	0.00244948	0.422023	0.282	0.167	1	MHB.3	cbx7a
mbd3b2	0.00247119	0.291668	0.769	0.637	1	MHB.3	mbd3b
jun	0.00259116	0.392978	0.333	0.206	1	MHB.3	jun
rpl19	0.00263433	0.288094	0.679	0.581	1	MHB.3	rpl19
faua	0.00281022	0.257497	0.654	0.492	1	MHB.3	faua
nrp2b	0.00297789	0.63159	0.41	0.276	1	MHB.3	nrp2b
celf3a1	0.00306846	0.265119	0.513	0.358	1	MHB.3	celf3a
grwd1	0.00311794	0.289556	0.436	0.3	1	MHB.3	grwd1
cux1a1	0.00331383	0.250811	0.538	0.388	1	MHB.3	cux1a
fgfr1a1	0.00386365	0.34557	0.705	0.597	1	MHB.3	fgfr1a
zcchc71	0.00390642	0.303574	0.679	0.546	1	MHB.3	zcchc7
rpl10a	0.00461207	0.266012	0.833	0.775	1	MHB.3	rpl10a
mdka3	0.00463393	0.298531	0.679	0.514	1	MHB.3	mdka
stox2b1	0.00473702	0.373493	0.564	0.447	1	MHB.3	stox2b
mpp5a1	0.00474069	0.350354	0.577	0.435	1	MHB.3	mpp5a
stat32	0.00484974	0.389065	0.679	0.56	1	MHB.3	stat3
si:dkey-244a7.11	0.00490446	0.316972	0.487	0.338	1	MHB.3	si:dkey-244a7.1
npm1a1	0.00522067	0.272315	0.654	0.526	1	MHB.3	npm1a
prim2	0.00536197	0.302323	0.692	0.566	1	MHB.3	prim2
gli2a4	0.00568622	0.2671	0.949	0.88	1	MHB.3	gli2a
smarcc1a	0.00577499	0.255158	0.654	0.523	1	MHB.3	smarcc1a
uhrf1	0.00607504	0.276416	0.5	0.368	1	MHB.3	uhrf1
ktn1	0.00650866	0.254119	0.615	0.473	1	MHB.3	ktn1
ccng1	0.00762508	0.297797	0.59	0.485	1	MHB.3	ccng1
rps11	0.00786375	0.302063	0.577	0.47	1	MHB.3	rps11
si:ch211-13k12.21	0.00857603	0.254497	0.59	0.47	1	MHB.3	si:ch211-13k12.2
eif4a2	0.00886014	0.279126	0.577	0.449	1	MHB.3	eif4a2
plxna21	0.00919597	0.392793	0.385	0.269	1	MHB.3	plxna2
arhgap21a2	0.00937058	0.279208	0.564	0.434	1	MHB.3	arhgap21a
tiam2a2	0.00946993	0.287617	0.744	0.649	1	MHB.3	tiam2a
pik3r1	0.00981411	0.261974	0.436	0.325	1	MHB.3	pik3r1
pax53	2.81507e-63	2.69323	0.907	0.128	5.48995e-59	MHB.4	pax5
en2b3	5.31268e-39	1.29991	0.741	0.122	1.03608e-34	MHB.4	en2b
fgf8b1	2.6329e-38	0.446772	0.333	0.024	5.13469e-34	MHB.4	fgf8b
pax2a3	1.72071e-33	1.82917	0.833	0.198	3.35573e-29	MHB.4	pax2a
pax2b3	6.10693e-29	1.56746	0.537	0.091	1.19097e-24	MHB.4	pax2b
lmx1bb3	2.42222e-23	1.06313	0.778	0.211	4.72381e-19	MHB.4	lmx1bb
ism11	9.24944e-20	0.487132	0.259	0.03	1.80382e-15	MHB.4	ism1
il17rd3	1.39752e-19	1.30893	0.778	0.29	2.72544e-15	MHB.4	il17rd
fras13	5.99399e-16	0.964912	0.648	0.213	1.16895e-11	MHB.4	fras1
ism2a	1.72171e-13	0.258359	0.185	0.023	3.35767e-09	MHB.4	ism2a
CABZ01041610.11	1.26649e-12	0.324538	0.204	0.029	2.4699e-08	MHB.4	CABZ01041610.1
ptprn26	1.38616e-12	0.942665	0.889	0.534	2.70328e-08	MHB.4	ptprn2
trim2b1	2.0928e-12	0.439719	0.352	0.081	4.08137e-08	MHB.4	trim2b
fgf18b1	4.72666e-12	0.366663	0.296	0.06	9.21792e-08	MHB.4	fgf18b
fgf8a	1.13219e-10	0.452896	0.259	0.054	2.208e-06	MHB.4	fgf8a
fgfrl1a1	3.15925e-10	1.02858	0.426	0.146	6.16117e-06	MHB.4	fgfrl1a
ppap2d2	5.21318e-10	0.634322	0.407	0.127	1.01667e-05	MHB.4	ppap2d
nkx6.21	8.1964e-10	0.304854	0.296	0.07	1.59846e-05	MHB.4	nkx6.2
sesn3	2.06717e-08	0.498577	0.333	0.099	0.000403139	MHB.4	sesn3
cacng8b	3.11819e-08	0.427848	0.241	0.059	0.00060811	MHB.4	cacng8b
bicc1a	3.72846e-08	0.279238	0.222	0.051	0.000727125	MHB.4	bicc1a
vegfaa1	1.94147e-07	0.31965	0.241	0.063	0.00378626	MHB.4	vegfaa
rbm33b3	1.54899e-06	0.391526	0.185	0.045	0.0302084	MHB.4	rbm33b
mapk13	1.93647e-06	0.578041	0.63	0.34	0.0377651	MHB.4	mapk1
zgc:1533721	2.02035e-06	0.505279	0.148	0.031	0.0394008	MHB.4	zgc:153372
kif21b1	2.02704e-06	0.439243	0.481	0.216	0.0395313	MHB.4	kif21b
foxp46	2.66347e-06	0.5592	0.981	0.891	0.0519429	MHB.4	foxp4
ntn1a3	4.0567e-06	0.413904	0.815	0.438	0.0791137	MHB.4	ntn1a
wdhd1	4.15278e-06	0.524084	0.648	0.366	0.0809875	MHB.4	wdhd1
efna5a3	5.42087e-06	0.694593	0.722	0.495	0.105718	MHB.4	efna5a
znf5362	5.51431e-06	0.418808	0.333	0.124	0.10754	MHB.4	znf536
si:ch211-284f22.31	6.20483e-06	0.450215	0.556	0.29	0.121007	MHB.4	si:ch211-284f22.3
plxna22	7.43849e-06	0.666276	0.5	0.268	0.145065	MHB.4	plxna2
si:ch211-286o17.12	8.86387e-06	0.458274	0.648	0.361	0.172863	MHB.4	si:ch211-286o17.1
ANOS1	9.13792e-06	0.323675	0.333	0.126	0.178208	MHB.4	ANOS1
adgrl3.11	9.1446e-06	0.534866	0.648	0.367	0.178338	MHB.4	adgrl3.1
slc1a3a1	9.493e-06	0.363844	0.537	0.262	0.185133	MHB.4	slc1a3a
rrm1	1.05345e-05	0.407669	0.759	0.464	0.205444	MHB.4	rrm1
jag2b4	1.24858e-05	0.724828	0.926	0.839	0.243498	MHB.4	jag2b
st8sia2	1.46218e-05	0.540508	0.556	0.309	0.285154	MHB.4	st8sia2
efna2a3	1.62173e-05	0.996588	0.796	0.572	0.31627	MHB.4	efna2a
zhx3	2.6721e-05	0.492734	0.426	0.204	0.521112	MHB.4	zhx3
msh6	3.5319e-05	0.585541	0.611	0.398	0.688792	MHB.4	msh6
lamb2l	4.11943e-05	0.421936	0.685	0.384	0.803371	MHB.4	lamb2l
lipeb1	4.94507e-05	0.391552	0.37	0.168	0.964387	MHB.4	lipeb
gab2	7.01514e-05	0.30067	0.315	0.131	1	MHB.4	gab2
efna3b1	7.3895e-05	0.84853	0.722	0.545	1	MHB.4	efna3b
BX649250.2	7.43011e-05	0.266764	0.333	0.141	1	MHB.4	BX649250.2
gas7a3	8.2499e-05	0.411022	0.407	0.193	1	MHB.4	gas7a
sox21a1	8.95695e-05	0.267293	0.296	0.12	1	MHB.4	sox21a
plce1	9.61603e-05	0.371287	0.519	0.274	1	MHB.4	plce1
cxxc5a2	0.000105052	0.344145	0.481	0.253	1	MHB.4	cxxc5a
fen1	0.000111804	0.282276	0.519	0.27	1	MHB.4	fen1
recql4	0.000131329	0.301727	0.407	0.198	1	MHB.4	recql4
rpa1	0.000158338	0.412894	0.704	0.455	1	MHB.4	rpa1
vdrb2	0.000215307	0.564898	0.667	0.48	1	MHB.4	vdrb
lrig1	0.000254956	0.494729	0.87	0.699	1	MHB.4	lrig1
en2a3	0.000282342	0.272882	0.148	0.044	1	MHB.4	en2a
etv41	0.000305131	0.475943	0.352	0.17	1	MHB.4	etv4
rpa2	0.000339787	0.275461	0.37	0.181	1	MHB.4	rpa2
ahcy	0.000353721	0.251295	0.222	0.084	1	MHB.4	ahcy
hmgn7	0.000354003	0.314027	0.611	0.376	1	MHB.4	hmgn7
mcm5	0.000355741	0.357431	0.648	0.389	1	MHB.4	mcm5
hs3st3b1b2	0.00035816	0.471635	0.759	0.503	1	MHB.4	hs3st3b1b
abcb7	0.000379234	0.270771	0.407	0.208	1	MHB.4	abcb7
dennd5b	0.000410762	0.411366	0.648	0.46	1	MHB.4	dennd5b
polr3a	0.000418574	0.268563	0.37	0.182	1	MHB.4	polr3a
sart3	0.00051643	0.367471	0.648	0.43	1	MHB.4	sart3
rabl2	0.000532435	0.257539	0.37	0.181	1	MHB.4	rabl2
upk3b	0.00056375	0.289875	0.241	0.101	1	MHB.4	upk3b
ier2a	0.00056441	0.257607	0.241	0.098	1	MHB.4	ier2a
celf2	0.000575141	0.352792	0.611	0.373	1	MHB.4	celf2
rnf150b	0.000586395	0.253108	0.241	0.099	1	MHB.4	rnf150b
plxna3	0.00068304	0.365545	0.926	0.865	1	MHB.4	plxna3
supt16h	0.000687482	0.309821	0.648	0.428	1	MHB.4	supt16h
pde4bb1	0.000723362	0.420132	0.37	0.191	1	MHB.4	pde4bb
pim3	0.000756891	0.27221	0.333	0.161	1	MHB.4	pim3
orc3	0.000805157	0.393937	0.556	0.371	1	MHB.4	orc3
abcb52	0.000850594	0.425099	0.481	0.271	1	MHB.4	abcb5
nr2f6b1	0.000912785	0.275495	0.407	0.213	1	MHB.4	nr2f6b
ccnd2a1	0.00095287	0.308294	0.537	0.327	1	MHB.4	ccnd2a
nudt14	0.00101066	0.338729	0.278	0.131	1	MHB.4	nudt14
parp1	0.00106248	0.300838	0.685	0.484	1	MHB.4	parp1
znrf34	0.00116996	0.424718	0.926	0.824	1	MHB.4	znrf3
lamc1	0.00123735	0.439482	0.722	0.551	1	MHB.4	lamc1
chek2	0.00128116	0.320807	0.296	0.148	1	MHB.4	chek2
e2f7	0.00141904	0.30469	0.315	0.159	1	MHB.4	e2f7
atad5a	0.0014356	0.342352	0.611	0.402	1	MHB.4	atad5a
purab	0.00154222	0.2792	0.241	0.106	1	MHB.4	purab
qkib	0.00155484	0.462838	0.648	0.445	1	MHB.4	qkib
brf1a	0.00158334	0.270267	0.296	0.142	1	MHB.4	brf1a
tcf7l1a	0.0015864	0.347095	0.685	0.502	1	MHB.4	tcf7l1a
s1pr22	0.0016424	0.467699	0.611	0.413	1	MHB.4	s1pr2
itga5	0.00165277	0.274187	0.222	0.096	1	MHB.4	itga5
ntn1b2	0.00170823	0.352022	0.333	0.171	1	MHB.4	ntn1b
ppargc1b	0.0017655	0.270073	0.315	0.159	1	MHB.4	ppargc1b
hmga21	0.00176816	0.457311	0.352	0.196	1	MHB.4	hmga2
lcorl	0.00182851	0.289803	0.463	0.276	1	MHB.4	lcorl
plagx	0.00185692	0.256826	0.407	0.231	1	MHB.4	plagx
znf384l	0.00213422	0.309334	0.463	0.288	1	MHB.4	znf384l
e2f3	0.00214481	0.42151	0.704	0.562	1	MHB.4	e2f3
ror12	0.00221409	0.331773	0.704	0.5	1	MHB.4	ror1
cdc5l	0.00251339	0.317979	0.5	0.327	1	MHB.4	cdc5l
cfl1	0.00251433	0.278011	0.741	0.533	1	MHB.4	cfl1
lin28b	0.00252045	0.326152	0.611	0.438	1	MHB.4	lin28b
fam110b	0.00269265	0.252415	0.167	0.066	1	MHB.4	fam110b
ptprna1	0.00271714	0.322587	0.63	0.433	1	MHB.4	ptprna
cad	0.00290108	0.386157	0.667	0.481	1	MHB.4	cad
fgfr1a2	0.00295065	0.326202	0.815	0.596	1	MHB.4	fgfr1a
rbfox3a1	0.00298376	0.337229	0.37	0.216	1	MHB.4	rbfox3a
ptbp1b	0.00342634	0.282586	0.815	0.663	1	MHB.4	ptbp1b
hsph1	0.00386818	0.454753	0.352	0.205	1	MHB.4	hsph1
rnf220a2	0.00398991	0.289858	0.741	0.551	1	MHB.4	rnf220a
wdr33	0.0040567	0.26254	0.796	0.591	1	MHB.4	wdr33
wu:fi36a101	0.00407279	0.345501	0.241	0.114	1	MHB.4	wu:fi36a10
cstf11	0.00429195	0.28058	0.259	0.132	1	MHB.4	cstf1
lig1	0.00465255	0.365157	0.722	0.551	1	MHB.4	lig1
ephb2b1	0.0047626	0.359968	0.481	0.311	1	MHB.4	ephb2b
crb2a5	0.00484426	0.527936	0.537	0.383	1	MHB.4	crb2a
man2a2	0.00516304	0.311219	0.574	0.401	1	MHB.4	man2a2
usp1	0.00520567	0.290105	0.426	0.268	1	MHB.4	usp1
si:dkey-239h2.31	0.00552379	0.297801	0.685	0.533	1	MHB.4	si:dkey-239h2.3
gulp1b	0.00553609	0.290713	0.241	0.119	1	MHB.4	gulp1b
dhx36	0.00578466	0.385756	0.667	0.539	1	MHB.4	dhx36
tiparp1	0.00597491	0.553319	0.333	0.204	1	MHB.4	tiparp
map2	0.00601211	0.284015	0.37	0.217	1	MHB.4	map2
soga11	0.00677216	0.273775	0.556	0.367	1	MHB.4	soga1
grb10a	0.00713708	0.317061	0.907	0.708	1	MHB.4	grb10a
pleca1	0.00723918	0.29644	0.556	0.389	1	MHB.4	pleca
greb1	0.00740209	0.315762	0.815	0.657	1	MHB.4	greb1
pold11	0.00762638	0.275176	0.352	0.209	1	MHB.4	pold1
spry21	0.00764523	0.27596	0.333	0.195	1	MHB.4	spry2
dnmt3ba	0.00780685	0.272791	0.537	0.372	1	MHB.4	dnmt3ba
srgap1a1	0.0079957	0.440168	0.796	0.703	1	MHB.4	srgap1a
rb1	0.00808425	0.32394	0.593	0.421	1	MHB.4	rb1
jade3	0.00813115	0.255757	0.593	0.437	1	MHB.4	jade3
aqr	0.00816042	0.257941	0.426	0.266	1	MHB.4	aqr
nasp	0.00818443	0.308152	0.556	0.39	1	MHB.4	nasp
spry41	0.00818924	0.361983	0.352	0.216	1	MHB.4	spry4
adgrv12	0.00857559	0.314701	0.907	0.769	1	MHB.4	adgrv1
nav2b2	0.0088477	0.290722	0.556	0.386	1	MHB.4	nav2b
ccne22	0.00903272	0.451201	0.556	0.407	1	MHB.4	ccne2
si:ch211-220f16.2	0.00923746	0.260238	0.407	0.252	1	MHB.4	si:ch211-220f16.2
cdh29	0.00963481	0.351584	0.296	0.17	1	MHB.4	cdh29
ipo7	0.00998107	0.277863	0.907	0.822	1	MHB.4	ipo7
pdgfbb4	1.72739e-40	1.21688	0.654	0.096	3.36876e-36	MHB.5	pdgfbb
gria3b3	8.91982e-38	1.20219	0.5	0.058	1.73954e-33	MHB.5	gria3b
mab21l22	7.02897e-32	0.581845	0.346	0.031	1.37079e-27	MHB.5	mab21l2
dab1b1	1.67523e-29	0.508195	0.346	0.034	3.26704e-25	MHB.5	dab1b
otx15	4.26512e-27	0.631274	0.5	0.076	8.31783e-23	MHB.5	otx1
csf2rb	8.67146e-26	0.282967	0.173	0.009	1.69111e-21	MHB.5	csf2rb
prom1b1	2.88637e-24	0.38082	0.288	0.029	5.629e-20	MHB.5	prom1b
dmbx1a3	7.49513e-24	0.666147	0.404	0.058	1.4617e-19	MHB.5	dmbx1a
en2b4	7.0369e-22	0.985075	0.596	0.126	1.37234e-17	MHB.5	en2b
pvalb6	7.42108e-21	0.528661	0.308	0.039	1.44726e-16	MHB.5	pvalb6
otx2b4	1.1053e-20	0.47069	0.346	0.048	2.15556e-16	MHB.5	otx2b
ndst2b4	7.17628e-20	1.1359	0.827	0.311	1.39952e-15	MHB.5	ndst2b
CABZ01041610.12	1.01621e-18	0.315237	0.25	0.028	1.98182e-14	MHB.5	CABZ01041610.1
got2b	9.78406e-16	0.272709	0.231	0.029	1.90809e-11	MHB.5	got2b
cxcl14	8.59034e-15	0.394034	0.173	0.018	1.67529e-10	MHB.5	cxcl14
fgf221	2.04298e-14	0.397743	0.212	0.027	3.98422e-10	MHB.5	fgf22
gdf113	2.26339e-14	1.20018	0.635	0.235	4.41406e-10	MHB.5	gdf11
zfhx46	6.97551e-14	0.877739	1	0.647	1.36036e-09	MHB.5	zfhx4
her3	9.9688e-14	0.716431	0.404	0.094	1.94412e-09	MHB.5	her3
pax7a2	1.33099e-12	1.0565	0.481	0.137	2.5957e-08	MHB.5	pax7a
tmem1081	3.35607e-12	0.862035	0.827	0.393	6.54501e-08	MHB.5	tmem108
dmbx1b2	1.60136e-11	0.260811	0.212	0.033	3.12297e-07	MHB.5	dmbx1b
efna2a4	2.3327e-11	0.944757	0.923	0.569	4.54923e-07	MHB.5	efna2a
SAMD54	4.57405e-11	0.502732	0.423	0.121	8.92031e-07	MHB.5	SAMD5
pax2a4	1.0346e-10	0.794624	0.577	0.204	2.01768e-06	MHB.5	pax2a
ephb4b2	1.04715e-10	0.71902	0.558	0.216	2.04215e-06	MHB.5	ephb4b
pax54	1.04796e-10	1.06123	0.462	0.139	2.04374e-06	MHB.5	pax5
kif5c3	1.51843e-10	0.368793	0.288	0.062	2.96124e-06	MHB.5	kif5c
efna5a4	1.7411e-10	0.83089	0.827	0.493	3.3955e-06	MHB.5	efna5a
zgc:101100	2.09741e-10	0.25393	0.173	0.025	4.09037e-06	MHB.5	zgc:101100
zgc:1533722	2.11064e-10	0.29744	0.192	0.03	4.11617e-06	MHB.5	zgc:153372
cachd15	8.72859e-10	0.746492	0.981	0.78	1.70225e-05	MHB.5	cachd1
klf12b1	1.30691e-09	0.84674	0.442	0.156	2.54874e-05	MHB.5	klf12b
zfpm2a1	1.48583e-09	0.526217	0.327	0.087	2.89766e-05	MHB.5	zfpm2a
ptprn27	2.76201e-09	0.587092	0.942	0.533	5.38648e-05	MHB.5	ptprn2
igdcc32	3.48292e-09	0.467029	0.423	0.133	6.7924e-05	MHB.5	igdcc3
si:dkey-246i14.32	4.28191e-09	0.532272	0.269	0.065	8.35058e-05	MHB.5	si:dkey-246i14.3
lrp8	7.13097e-09	0.98585	0.827	0.477	0.000139068	MHB.5	lrp8
sema3aa2	1.46961e-08	0.49534	0.404	0.138	0.000286604	MHB.5	sema3aa
foxp47	1.70956e-08	0.6522	0.981	0.891	0.000333398	MHB.5	foxp4
zcchc72	2.54313e-08	0.694861	0.827	0.545	0.000495961	MHB.5	zcchc7
timm50	2.67115e-08	0.402616	0.519	0.199	0.000520927	MHB.5	timm50
znrf35	5.21563e-08	0.637901	0.981	0.823	0.00101715	MHB.5	znrf3
hs3st3b1b3	5.35322e-08	0.691579	0.846	0.502	0.00104398	MHB.5	hs3st3b1b
mocs3	1.0154e-07	0.399096	0.365	0.122	0.00198024	MHB.5	mocs3
gart1	1.85722e-07	0.405747	0.462	0.185	0.00362195	MHB.5	gart
ncl1	2.04153e-07	0.509834	0.923	0.704	0.0039814	MHB.5	ncl
scube21	2.0958e-07	0.431606	0.75	0.383	0.00408724	MHB.5	scube2
wnt8b4	2.16901e-07	0.38604	0.5	0.193	0.00423	MHB.5	wnt8b
lnx1	2.1742e-07	0.277001	0.269	0.074	0.00424012	MHB.5	lnx1
ngfb2	2.5571e-07	0.273977	0.173	0.035	0.00498686	MHB.5	ngfb
amot4	3.3193e-07	0.713288	0.75	0.437	0.00647329	MHB.5	amot
fam210ab	4.98376e-07	0.274687	0.25	0.068	0.00971933	MHB.5	fam210ab
otx2a5	5.88067e-07	0.320934	0.269	0.075	0.0114685	MHB.5	otx2a
ldlrad4a	7.13312e-07	0.277613	0.327	0.105	0.013911	MHB.5	ldlrad4a
si:dkey-12j5.11	7.50398e-07	0.605204	0.808	0.528	0.0146343	MHB.5	si:dkey-12j5.1
polrmt1	8.57076e-07	0.68625	0.558	0.279	0.0167147	MHB.5	polrmt
tenm33	1.03449e-06	0.659962	0.904	0.605	0.0201746	MHB.5	tenm3
cc2d1b	1.2208e-06	0.352012	0.462	0.192	0.023808	MHB.5	cc2d1b
hif1an1	1.24712e-06	0.452525	0.462	0.194	0.0243213	MHB.5	hif1an
zfhx31	1.34524e-06	0.591735	0.673	0.364	0.0262349	MHB.5	zfhx3
nop561	1.6511e-06	0.549268	0.981	0.758	0.0321997	MHB.5	nop56
tiam2a3	1.71307e-06	0.677781	0.827	0.648	0.0334083	MHB.5	tiam2a
kremen1	1.78116e-06	0.396678	0.212	0.056	0.0347362	MHB.5	kremen1
nav2b3	2.346e-06	0.544902	0.692	0.383	0.0457517	MHB.5	nav2b
abcb53	2.5554e-06	0.506219	0.558	0.269	0.0498355	MHB.5	abcb5
fign1	2.89452e-06	0.395212	0.904	0.531	0.0564489	MHB.5	fign
pou3f3a1	3.0971e-06	0.455097	0.423	0.183	0.0603996	MHB.5	pou3f3a
skia4	3.33018e-06	0.509278	0.904	0.619	0.0649452	MHB.5	skia
pla2g6	4.57609e-06	0.292845	0.308	0.107	0.0892429	MHB.5	pla2g6
snu13b	5.98518e-06	0.405714	0.558	0.27	0.116723	MHB.5	snu13b
shcbp1	6.81134e-06	0.281623	0.462	0.198	0.132835	MHB.5	shcbp1
kif20a	8.08471e-06	0.535581	0.731	0.439	0.157668	MHB.5	kif20a
zgc:114120	8.3354e-06	0.321089	0.212	0.061	0.162557	MHB.5	zgc:114120
alpl	9.07336e-06	0.315903	0.192	0.052	0.176949	MHB.5	alpl
efna2b	9.13542e-06	0.283943	0.173	0.044	0.178159	MHB.5	efna2b
cd3eap	9.28753e-06	0.310426	0.462	0.204	0.181125	MHB.5	cd3eap
gli2a5	9.7746e-06	0.470324	1	0.88	0.190624	MHB.5	gli2a
ppargc1b1	1.04883e-05	0.307107	0.385	0.157	0.204544	MHB.5	ppargc1b
pwp2h1	1.29165e-05	0.53835	0.769	0.558	0.251898	MHB.5	pwp2h
wu:fi36a102	1.31407e-05	0.418559	0.308	0.113	0.256271	MHB.5	wu:fi36a10
aurka	1.33991e-05	0.41832	0.481	0.235	0.26131	MHB.5	aurka
rbm33b4	1.50589e-05	0.303777	0.173	0.045	0.293679	MHB.5	rbm33b
col4a61	1.63667e-05	0.494928	0.942	0.704	0.319183	MHB.5	col4a6
nat10	1.78059e-05	0.342846	0.5	0.24	0.347251	MHB.5	nat10
il17rd4	1.87368e-05	0.637544	0.558	0.295	0.365406	MHB.5	il17rd
tmem64	2.09224e-05	0.302391	0.308	0.117	0.408029	MHB.5	tmem64
abat	2.3505e-05	0.339194	0.327	0.127	0.458394	MHB.5	abat
nap1l4a	2.49704e-05	0.276645	0.385	0.161	0.486972	MHB.5	nap1l4a
nop2	2.69894e-05	0.428855	0.635	0.367	0.526347	MHB.5	nop2
pfas	2.82567e-05	0.296246	0.365	0.152	0.551062	MHB.5	pfas
cplx2	2.96915e-05	0.479379	0.25	0.087	0.579043	MHB.5	cplx2
ttc27	2.99503e-05	0.440663	0.635	0.374	0.584091	MHB.5	ttc27
mrpl12	3.22883e-05	0.341962	0.385	0.167	0.629686	MHB.5	mrpl12
ncam1a1	3.27567e-05	0.416536	0.981	0.854	0.638822	MHB.5	ncam1a
rpl10a1	3.45358e-05	0.492369	0.942	0.773	0.673518	MHB.5	rpl10a
CR936977.2	3.56804e-05	0.253297	0.269	0.095	0.695839	MHB.5	CR936977.2
bora	3.68594e-05	0.252573	0.308	0.117	0.718831	MHB.5	bora
msi2b1	3.74068e-05	0.557982	0.769	0.551	0.729507	MHB.5	msi2b
gli33	3.85994e-05	0.471723	0.962	0.879	0.752765	MHB.5	gli3
gar1	4.28898e-05	0.349633	0.5	0.252	0.836437	MHB.5	gar1
ripor12	4.40224e-05	0.50128	0.808	0.589	0.858525	MHB.5	ripor1
msi2a	4.8167e-05	0.371466	0.442	0.22	0.939354	MHB.5	msi2a
msh3	4.99503e-05	0.306965	0.365	0.158	0.97413	MHB.5	msh3
efna3b2	5.12288e-05	0.720412	0.731	0.545	0.999065	MHB.5	efna3b
dgkza	5.29748e-05	0.333948	0.385	0.169	1	MHB.5	dgkza
atic	5.5949e-05	0.310861	0.346	0.15	1	MHB.5	atic
romo1	5.93757e-05	0.285955	0.25	0.09	1	MHB.5	romo1
tenm42	6.19961e-05	0.362645	0.962	0.774	1	MHB.5	tenm4
tnrc6c21	6.83794e-05	0.31191	0.327	0.136	1	MHB.5	tnrc6c2
ptprua1	7.24945e-05	0.534423	0.308	0.125	1	MHB.5	ptprua
bop12	7.26056e-05	0.496533	0.808	0.565	1	MHB.5	bop1
hspd11	7.39102e-05	0.36739	0.519	0.272	1	MHB.5	hspd1
ldb2a1	7.64357e-05	0.330001	0.385	0.18	1	MHB.5	ldb2a
caskin11	8.17174e-05	0.349687	0.5	0.256	1	MHB.5	caskin1
mdn1	8.61402e-05	0.378805	0.596	0.342	1	MHB.5	mdn1
usp42	0.000103105	0.395634	0.654	0.394	1	MHB.5	usp42
macrod2	0.000112214	0.313345	0.404	0.195	1	MHB.5	macrod2
s1pr23	0.000121674	0.577172	0.615	0.413	1	MHB.5	s1pr2
fibpa	0.00012284	0.250458	0.212	0.072	1	MHB.5	fibpa
def8	0.000134972	0.368714	0.596	0.338	1	MHB.5	def8
suclg21	0.000147517	0.380478	0.519	0.295	1	MHB.5	suclg2
cyth1b	0.000165344	0.587135	0.558	0.353	1	MHB.5	cyth1b
zmp:0000000936	0.000166479	0.330403	0.269	0.108	1	MHB.5	zmp:0000000936
rps25	0.000172799	0.425058	0.846	0.61	1	MHB.5	rps25
pcmt	0.000183309	0.269257	0.25	0.097	1	MHB.5	pcmt
tor3a	0.000183659	0.265757	0.288	0.118	1	MHB.5	tor3a
nhsl21	0.000185898	0.286629	0.192	0.064	1	MHB.5	nhsl2
noc2l1	0.000192065	0.346893	0.692	0.466	1	MHB.5	noc2l
sox21a2	0.000200046	0.263288	0.288	0.12	1	MHB.5	sox21a
GCA	0.00020525	0.260399	0.308	0.129	1	MHB.5	GCA
ror13	0.000211707	0.586122	0.769	0.498	1	MHB.5	ror1
bcat2	0.000213705	0.337457	0.442	0.234	1	MHB.5	bcat2
immp2l	0.000224738	0.54857	0.481	0.291	1	MHB.5	immp2l
arhgap21a3	0.000243592	0.447607	0.635	0.434	1	MHB.5	arhgap21a
polr1a	0.000270765	0.402982	0.596	0.395	1	MHB.5	polr1a
thraa	0.000271046	0.255155	0.231	0.086	1	MHB.5	thraa
FP236812.1	0.00027352	0.296805	0.365	0.174	1	MHB.5	FP236812.1
gcna	0.000279619	0.274524	0.481	0.246	1	MHB.5	gcna
ptprnb3	0.000280398	0.522999	0.731	0.498	1	MHB.5	ptprnb
celsr1b3	0.000293431	0.348836	0.846	0.656	1	MHB.5	celsr1b
pa2g4b	0.000294275	0.273001	0.462	0.237	1	MHB.5	pa2g4b
si:dkey-7l6.3	0.000304081	0.268151	0.25	0.1	1	MHB.5	si:dkey-7l6.3
nphp4	0.00031397	0.276786	0.654	0.371	1	MHB.5	nphp4
adka	0.000318791	0.374594	0.923	0.718	1	MHB.5	adka
rpl7l1	0.000356282	0.288477	0.423	0.216	1	MHB.5	rpl7l1
eif1ad	0.000362053	0.251338	0.308	0.137	1	MHB.5	eif1ad
triob	0.000365946	0.279047	0.731	0.455	1	MHB.5	triob
kif2c	0.000373748	0.330672	0.538	0.299	1	MHB.5	kif2c
zbtb16a2	0.000385333	0.316392	1	0.916	1	MHB.5	zbtb16a
drosha	0.00039858	0.356499	0.423	0.231	1	MHB.5	drosha
pax2b4	0.000411127	0.347586	0.25	0.098	1	MHB.5	pax2b
rps4x1	0.000418786	0.354042	0.808	0.621	1	MHB.5	rps4x
larp4ab	0.000420552	0.383898	0.519	0.323	1	MHB.5	larp4ab
wnt33	0.000445575	0.387769	0.481	0.262	1	MHB.5	wnt3
scube11	0.000473775	0.27329	0.192	0.067	1	MHB.5	scube1
si:dkey-151g10.6	0.000486376	0.361293	0.981	0.922	1	MHB.5	si:dkey-151g10.6
zgc:163061.1	0.000488863	0.383458	0.115	0.03	1	MHB.5	zgc:163061.1
fgfr23	0.000536999	0.317375	0.962	0.814	1	MHB.5	fgfr2
pcxa	0.000565541	0.285846	0.404	0.209	1	MHB.5	pcxa
rpl31	0.000571954	0.363612	0.846	0.725	1	MHB.5	rpl3
top2a1	0.000622308	0.374831	0.692	0.452	1	MHB.5	top2a
gal3st4	0.000709756	0.275495	0.288	0.13	1	MHB.5	gal3st4
tdh	0.000731482	0.274316	0.404	0.213	1	MHB.5	tdh
aars1	0.000739282	0.286684	0.538	0.32	1	MHB.5	aars1
FQ311928.11	0.000740701	0.34433	0.269	0.121	1	MHB.5	FQ311928.1
rps6kal	0.000813606	0.310464	0.635	0.402	1	MHB.5	rps6kal
ddx181	0.000822288	0.348791	0.846	0.656	1	MHB.5	ddx18
zfr2	0.000853737	0.341755	0.481	0.269	1	MHB.5	zfr2
galnt11	0.000877773	0.31606	0.269	0.122	1	MHB.5	galnt11
ranbp1	0.000889124	0.301516	0.538	0.32	1	MHB.5	ranbp1
zgc:153284	0.000974254	0.454726	0.538	0.331	1	MHB.5	zgc:153284
wnt12	0.00100651	0.306303	0.212	0.084	1	MHB.5	wnt1
dkc1	0.0010234	0.328739	0.846	0.648	1	MHB.5	dkc1
hk22	0.00102456	0.334611	0.442	0.248	1	MHB.5	hk2
asap1b	0.00107172	0.352315	0.615	0.404	1	MHB.5	asap1b
uba52	0.00107531	0.411334	0.75	0.572	1	MHB.5	uba52
auts2a1	0.00112544	0.437654	0.673	0.507	1	MHB.5	auts2a
cita	0.00114759	0.291377	0.615	0.395	1	MHB.5	cita
foxp1b1	0.00116111	0.457697	0.769	0.548	1	MHB.5	foxp1b
rpl5a	0.00120079	0.360494	0.846	0.638	1	MHB.5	rpl5a
hccsa.1	0.00128102	0.271134	0.269	0.12	1	MHB.5	hccsa.1
zgc:771583	0.00133762	0.433701	0.577	0.364	1	MHB.5	zgc:77158
rpl21	0.00134114	0.270448	0.827	0.605	1	MHB.5	rpl21
erf	0.00138299	0.272709	0.673	0.425	1	MHB.5	erf
wsb1	0.00138639	0.274713	0.5	0.297	1	MHB.5	wsb1
nrbp2a	0.00147568	0.286615	0.346	0.179	1	MHB.5	nrbp2a
si:dkey-25o16.4	0.00158151	0.35244	0.481	0.293	1	MHB.5	si:dkey-25o16.4
prmt31	0.00163819	0.350459	0.423	0.24	1	MHB.5	prmt3
wdr43	0.00165482	0.250575	0.558	0.35	1	MHB.5	wdr43
igsf9a1	0.00170027	0.694022	0.615	0.461	1	MHB.5	igsf9a
mmd2b	0.00174123	0.280321	0.25	0.115	1	MHB.5	mmd2b
rnpc3	0.00187946	0.284277	0.519	0.313	1	MHB.5	rnpc3
flrt32	0.00188443	0.26171	0.462	0.261	1	MHB.5	flrt3
usp24	0.00190131	0.404302	0.75	0.561	1	MHB.5	usp24
stt3b	0.00190768	0.281069	0.808	0.639	1	MHB.5	stt3b
smap1	0.00193111	0.298615	0.769	0.572	1	MHB.5	smap1
supt3h	0.00195475	0.279832	0.615	0.402	1	MHB.5	supt3h
si:ch73-280o22.2	0.00213119	0.299846	0.442	0.271	1	MHB.5	si:ch73-280o22.2
eef2a.1	0.00214683	0.313819	0.635	0.442	1	MHB.5	eef2a.1
mpp6a	0.00220575	0.382354	0.615	0.42	1	MHB.5	mpp6a
cebpz	0.00222821	0.29191	0.404	0.229	1	MHB.5	cebpz
pcf11	0.00226434	0.289704	0.75	0.578	1	MHB.5	pcf11
zgc:174862	0.00235097	0.313687	0.5	0.31	1	MHB.5	zgc:174862
efl1	0.00236458	0.396402	0.365	0.217	1	MHB.5	efl1
traf7	0.00243368	0.278267	0.5	0.291	1	MHB.5	traf7
aspm	0.0024521	0.289538	0.731	0.498	1	MHB.5	aspm
rnd1b	0.00249519	0.251356	0.481	0.287	1	MHB.5	rnd1b
wdr181	0.00252996	0.37653	0.808	0.644	1	MHB.5	wdr18
si:ch211-269k10.21	0.0026176	0.307444	0.538	0.341	1	MHB.5	si:ch211-269k10.2
dnmbp	0.00263965	0.324403	0.442	0.269	1	MHB.5	dnmbp
cdk1	0.00267935	0.286335	0.423	0.25	1	MHB.5	cdk1
mat2ab1	0.00292206	0.342951	0.365	0.207	1	MHB.5	mat2ab
dnaja2a	0.00299337	0.266481	0.5	0.315	1	MHB.5	dnaja2a
wls2	0.00301685	0.290861	0.538	0.353	1	MHB.5	wls
robo2.11	0.0030521	0.449662	0.288	0.15	1	MHB.5	robo2.1
PKN21	0.00307297	0.253596	0.327	0.174	1	MHB.5	PKN2
cbx1a	0.0030954	0.277916	0.577	0.389	1	MHB.5	cbx1a
mat2aa	0.00313501	0.334139	0.654	0.446	1	MHB.5	mat2aa
si:dkey-28i19.1	0.00314969	0.286704	0.385	0.223	1	MHB.5	si:dkey-28i19.1
fbl1	0.00319295	0.318224	0.558	0.367	1	MHB.5	fbl
adck1	0.00320818	0.299587	0.481	0.301	1	MHB.5	adck1
thoc2	0.003282	0.307939	0.942	0.81	1	MHB.5	thoc2
acaca	0.00330454	0.291937	0.192	0.081	1	MHB.5	acaca
fam76b	0.00335418	0.294463	0.481	0.316	1	MHB.5	fam76b
si:ch73-386h18.1	0.00336155	0.339737	0.692	0.539	1	MHB.5	si:ch73-386h18.1
rhocb	0.00348225	0.267465	0.404	0.233	1	MHB.5	rhocb
utp25	0.00352771	0.281135	0.365	0.213	1	MHB.5	utp25
mrpl36	0.00354151	0.320229	0.327	0.177	1	MHB.5	mrpl36
zhx2a1	0.00360309	0.427559	0.462	0.297	1	MHB.5	zhx2a
mex3b2	0.00366891	0.403365	0.538	0.378	1	MHB.5	mex3b
paics	0.00384207	0.33034	0.442	0.282	1	MHB.5	paics
chd4b1	0.00408367	0.357727	0.846	0.793	1	MHB.5	chd4b
zeb1b1	0.00435064	0.296015	0.942	0.793	1	MHB.5	zeb1b
rpl22	0.00444699	0.282024	0.731	0.588	1	MHB.5	rpl22
si:ch211-126j24.1	0.00470113	0.274474	0.404	0.233	1	MHB.5	si:ch211-126j24.1
sept9b	0.00498705	0.292761	0.308	0.167	1	MHB.5	sept9b
ddx101	0.00504979	0.298774	0.462	0.277	1	MHB.5	ddx10
arntl2	0.00505127	0.282496	0.635	0.473	1	MHB.5	arntl2
pnn	0.00509819	0.281037	0.558	0.4	1	MHB.5	pnn
SEC14L1	0.00512955	0.331486	0.385	0.229	1	MHB.5	SEC14L1
taf1b	0.00522417	0.294276	0.327	0.184	1	MHB.5	taf1b
arhgef101	0.00549399	0.307135	0.404	0.229	1	MHB.5	arhgef10
polq	0.00568625	0.316635	0.673	0.532	1	MHB.5	polq
rpl37.1	0.00569811	0.306407	0.846	0.756	1	MHB.5	rpl37.1
crb11	0.00589397	0.371828	0.5	0.341	1	MHB.5	crb1
mbd3b3	0.00601532	0.312371	0.808	0.638	1	MHB.5	mbd3b
nbas	0.00610796	0.282245	0.423	0.263	1	MHB.5	nbas
plagl2	0.00618862	0.328005	0.846	0.717	1	MHB.5	plagl2
kif23	0.00635494	0.26856	0.481	0.313	1	MHB.5	kif23
dgkh1	0.00681452	0.25016	0.481	0.311	1	MHB.5	dgkh
mdka4	0.00692331	0.288601	0.692	0.516	1	MHB.5	mdka
rpl361	0.00699249	0.305663	0.865	0.699	1	MHB.5	rpl36
prkd3	0.00719158	0.314413	0.308	0.171	1	MHB.5	prkd3
rpl22l11	0.00734944	0.305457	0.538	0.382	1	MHB.5	rpl22l1
tyw11	0.00743423	0.287858	0.635	0.452	1	MHB.5	tyw1
zgc:112980	0.00762154	0.25885	0.385	0.236	1	MHB.5	zgc:112980
stox2b2	0.00776504	0.364669	0.596	0.447	1	MHB.5	stox2b
ptges3b	0.00787684	0.267836	0.519	0.341	1	MHB.5	ptges3b
ssuh2rs1	0.00790615	0.272065	0.442	0.282	1	MHB.5	ssuh2rs1
kif14	0.00803792	0.281882	0.5	0.334	1	MHB.5	kif14
dph11	0.00807155	0.338592	0.538	0.38	1	MHB.5	dph1
crb2a6	0.00869836	0.270155	0.558	0.383	1	MHB.5	crb2a
zgc:162472	0.00875924	0.264942	0.346	0.208	1	MHB.5	zgc:162472
spen	0.00877162	0.274693	0.577	0.393	1	MHB.5	spen
prkcbb	0.00877499	0.254301	0.365	0.224	1	MHB.5	prkcbb
pou3f3b2	0.00890498	0.282987	0.423	0.274	1	MHB.5	pou3f3b
aldh7a1	0.00989093	0.312371	0.346	0.211	1	MHB.5	aldh7a1
rpl18a	0.00994028	0.278696	0.731	0.56	1	MHB.5	rpl18a
sox1a	2.5346e-20	0.295144	0.176	0.005	4.94298e-16	MHB.6	sox1a
pkdcca3	8.37601e-14	1.51658	0.824	0.183	1.63349e-09	MHB.6	pkdcca
CR356242.11	7.05214e-12	1.40561	0.647	0.129	1.37531e-07	MHB.6	CR356242.1
pax2a5	6.6139e-10	1.61584	0.765	0.208	1.28984e-05	MHB.6	pax2a
si:dkey-188g12.1	1.02566e-09	0.354415	0.176	0.011	2.00024e-05	MHB.6	si:dkey-188g12.1
phox2a	5.87566e-09	0.264619	0.235	0.022	0.000114587	MHB.6	phox2a
si:dkey-83f18.15	4.48914e-08	0.641473	0.471	0.092	0.000875471	MHB.6	si:dkey-83f18.15
tgm2l	1.53925e-07	0.451306	0.353	0.056	0.00300185	MHB.6	tgm2l
s1pr24	4.09076e-07	1.13492	0.882	0.414	0.00797781	MHB.6	s1pr2
efna5a5	1.8501e-06	1.01964	0.882	0.498	0.0360807	MHB.6	efna5a
zeb1b2	2.15399e-06	1.04277	1	0.794	0.0420071	MHB.6	zeb1b
shisa2a1	2.4323e-06	0.607463	0.294	0.049	0.0474348	MHB.6	shisa2a
ror14	2.48295e-06	1.35693	0.882	0.501	0.0484224	MHB.6	ror1
NAV11	6.34696e-06	1.29676	0.824	0.476	0.123779	MHB.6	NAV1
ephb3a1	1.28677e-05	0.743033	0.765	0.342	0.250945	MHB.6	ephb3a
her52	1.46588e-05	0.390543	0.176	0.022	0.285875	MHB.6	her5
trpc6b	2.11951e-05	0.434349	0.235	0.038	0.413347	MHB.6	trpc6b
parvaa	2.53068e-05	0.555889	0.471	0.137	0.493534	MHB.6	parvaa
spry22	2.84794e-05	0.555686	0.588	0.195	0.555406	MHB.6	spry2
plin2	4.16488e-05	0.306489	0.235	0.039	0.812235	MHB.6	plin2
ebf2	5.78329e-05	0.604751	0.647	0.224	1	MHB.6	ebf2
inka1b	6.18096e-05	0.283969	0.235	0.04	1	MHB.6	inka1b
fam189a12	8.99792e-05	1.44268	0.529	0.191	1	MHB.6	fam189a1
her112	0.000104525	0.321418	0.235	0.042	1	MHB.6	her11
mt-atp6	0.000109918	0.912677	0.882	0.498	1	MHB.6	mt-atp6
arhgap361	0.000133269	0.481521	0.294	0.065	1	MHB.6	arhgap36
usp54a1	0.000134848	0.601828	0.824	0.445	1	MHB.6	usp54a
col27a1b1	0.000136654	0.528542	0.353	0.093	1	MHB.6	col27a1b
pax55	0.000146699	0.715411	0.471	0.144	1	MHB.6	pax5
mt-co2	0.000186118	0.798509	0.882	0.616	1	MHB.6	mt-co2
cnep1r1	0.000203524	0.391846	0.294	0.069	1	MHB.6	cnep1r1
AL929009.3	0.000223647	0.271418	0.294	0.066	1	MHB.6	AL929009.3
adgrl2a2	0.00024136	0.729497	1	0.862	1	MHB.6	adgrl2a
si:dkeyp-86c4.1	0.000302657	0.548039	0.412	0.128	1	MHB.6	si:dkeyp-86c4.1
glyctk	0.000309968	0.35269	0.235	0.048	1	MHB.6	glyctk
si:dkey-246j6.1	0.000309975	0.262252	0.176	0.029	1	MHB.6	si:dkey-246j6.1
sobpb	0.00031168	0.483905	0.412	0.126	1	MHB.6	sobpb
spsb4a1	0.000378979	0.765048	1	0.553	1	MHB.6	spsb4a
rasl10a	0.00059734	0.382892	0.176	0.031	1	MHB.6	rasl10a
glt8d1	0.000642803	0.312447	0.294	0.074	1	MHB.6	glt8d1
gng3	0.000670304	0.254586	0.176	0.031	1	MHB.6	gng3
efnb2b2	0.000714809	0.859565	0.765	0.439	1	MHB.6	efnb2b
robo3	0.00072087	0.648698	0.824	0.482	1	MHB.6	robo3
spns2	0.000777316	0.65383	0.176	0.033	1	MHB.6	spns2
mt-co3	0.0008061	0.527462	0.941	0.576	1	MHB.6	mt-co3
plxnb2a.11	0.000856998	0.352762	0.294	0.078	1	MHB.6	plxnb2a.1
nr6a1a	0.000910092	0.8743	0.706	0.399	1	MHB.6	nr6a1a
skia5	0.000968392	0.697774	0.882	0.623	1	MHB.6	skia
letm1	0.00100123	0.659461	0.765	0.488	1	MHB.6	letm1
si:dkey-49n23.11	0.00102622	0.483405	0.471	0.166	1	MHB.6	si:dkey-49n23.1
FO704871.1	0.00112285	0.349819	0.235	0.056	1	MHB.6	FO704871.1
fam120b	0.00117328	0.317393	0.353	0.106	1	MHB.6	fam120b
gbe1b	0.0015642	0.278251	0.235	0.057	1	MHB.6	gbe1b
mat2al	0.00161006	0.277707	0.118	0.017	1	MHB.6	mat2al
dkc11	0.00192891	0.636186	0.824	0.651	1	MHB.6	dkc1
znf827	0.00195316	0.666386	0.765	0.493	1	MHB.6	znf827
ehd1a	0.00208407	0.27483	0.235	0.059	1	MHB.6	ehd1a
cnpy2	0.00227624	0.337254	0.235	0.06	1	MHB.6	cnpy2
rnf41	0.00251942	0.367178	0.353	0.12	1	MHB.6	rnf41
afdna2	0.0027541	0.573136	1	0.802	1	MHB.6	afdna
bckdhb	0.00281864	0.347569	0.471	0.185	1	MHB.6	bckdhb
txndc15	0.00288392	0.27711	0.118	0.019	1	MHB.6	txndc15
serinc4	0.00295041	0.485975	0.235	0.065	1	MHB.6	serinc4
prpf39	0.00299991	0.45601	0.647	0.336	1	MHB.6	prpf39
si:dkey-16l2.16	0.00302559	0.312028	0.353	0.119	1	MHB.6	si:dkey-16l2.16
h3f3b.1	0.00312159	0.531054	0.706	0.436	1	MHB.6	h3f3b.1
dph3	0.0032106	0.276512	0.118	0.019	1	MHB.6	dph3
rad23ab	0.00334637	0.340644	0.118	0.019	1	MHB.6	rad23ab
ston21	0.0033873	0.586352	0.412	0.171	1	MHB.6	ston2
si:dkey-258f14.2	0.00344514	0.358126	0.353	0.125	1	MHB.6	si:dkey-258f14.2
si:zfos-905g2.1	0.00351072	0.410554	0.294	0.094	1	MHB.6	si:zfos-905g2.1
far1	0.00353342	0.485069	0.529	0.243	1	MHB.6	far1
prelid1a	0.00382556	0.306149	0.353	0.122	1	MHB.6	prelid1a
her31	0.00383771	0.701938	0.294	0.099	1	MHB.6	her3
si:ch211-152c2.3	0.00386183	0.454221	0.353	0.128	1	MHB.6	si:ch211-152c2.3
dock9b	0.00392461	0.509994	0.294	0.099	1	MHB.6	dock9b
nrp2b1	0.00398028	0.978177	0.529	0.278	1	MHB.6	nrp2b
rad51	0.00420616	0.37881	0.529	0.24	1	MHB.6	rad51
fnbp1l	0.00424215	0.520958	0.706	0.427	1	MHB.6	fnbp1l
ctsba	0.00442391	0.340147	0.294	0.095	1	MHB.6	ctsba
zgc:664331	0.00444067	0.536272	0.471	0.221	1	MHB.6	zgc:66433
btbd10a	0.00462769	0.470591	0.471	0.214	1	MHB.6	btbd10a
lrrc8c	0.00507383	0.479224	0.471	0.21	1	MHB.6	lrrc8c
rps251	0.00529046	0.346272	0.882	0.613	1	MHB.6	rps25
tmem145	0.00536107	0.375526	0.235	0.068	1	MHB.6	tmem145
tia1	0.00552543	0.598213	0.588	0.328	1	MHB.6	tia1
nol61	0.00554073	0.599038	0.647	0.375	1	MHB.6	nol6
usp14	0.00581524	0.568506	0.412	0.191	1	MHB.6	usp14
greb1l	0.00607568	0.441029	1	0.761	1	MHB.6	greb1l
gas7a4	0.00637884	0.392866	0.471	0.196	1	MHB.6	gas7a
etv42	0.00639868	0.44471	0.412	0.172	1	MHB.6	etv4
sec61a1l	0.00654393	0.328184	0.235	0.071	1	MHB.6	sec61a1l
szrd1	0.00673702	0.373928	0.471	0.212	1	MHB.6	szrd1
plxdc22	0.00682453	0.52641	0.882	0.612	1	MHB.6	plxdc2
taf4a	0.00695358	0.505438	0.412	0.191	1	MHB.6	taf4a
C18H19orf47	0.00713434	0.468079	0.471	0.239	1	MHB.6	C18H19orf47
mrpl22	0.00715011	0.326489	0.235	0.072	1	MHB.6	mrpl22
2023-09-15	0.00719819	0.394226	0.529	0.252	1	MHB.6	2023-09-15
clk2b	0.00740575	0.392664	0.412	0.173	1	MHB.6	clk2b
col18a1a2	0.00747746	0.509186	0.941	0.816	1	MHB.6	col18a1a
lmx1bb4	0.00764185	0.759598	0.471	0.222	1	MHB.6	lmx1bb
mdkb1	0.00775916	0.400915	0.647	0.341	1	MHB.6	mdkb
xk	0.00817316	0.485975	0.235	0.07	1	MHB.6	xk
auts2b	0.00827947	0.471388	0.706	0.396	1	MHB.6	auts2b
rpl23a	0.00843909	0.497316	0.765	0.499	1	MHB.6	rpl23a
mthfd1l	0.00859181	0.355396	0.412	0.176	1	MHB.6	mthfd1l
si:ch211-169p10.1	0.00875273	0.311493	0.294	0.103	1	MHB.6	si:ch211-169p10.1
ccdc187	0.0088139	0.490816	0.412	0.195	1	MHB.6	ccdc187
anapc7	0.00890566	0.333066	0.294	0.106	1	MHB.6	anapc7
ptp4a1	0.00914757	0.411105	0.647	0.383	1	MHB.6	ptp4a1
arrdc3b	2.76645e-20	1.02785	0.568	0.123	5.39512e-16	Neurog	arrdc3b
arrdc3a	3.30759e-13	0.726964	0.409	0.092	6.45045e-09	Neurog	arrdc3a
lhx2b1	9.12101e-12	0.450512	0.114	0.009	1.77878e-07	Neurog	lhx2b
dnttip21	1.32496e-09	1.10251	0.614	0.292	2.58394e-05	Neurog	dnttip2
rps16	2.37612e-08	0.865936	0.75	0.529	0.000463391	Neurog	rps16
zgc:162611	2.38232e-08	0.321431	0.182	0.031	0.000464601	Neurog	zgc:162611
ccl19a.1	3.60197e-08	0.282294	0.205	0.038	0.000702457	Neurog	ccl19a.1
shisa2a2	4.23798e-08	0.454965	0.227	0.047	0.000826492	Neurog	shisa2a
cdkn1ca	9.14561e-08	0.760359	0.5	0.209	0.00178358	Neurog	cdkn1ca
gbp	1.03363e-07	0.635928	0.386	0.134	0.00201578	Neurog	gbp
id1	1.2191e-07	1.07709	0.864	0.634	0.0023775	Neurog	id1
trib2	1.36533e-07	0.516378	0.5	0.205	0.00266266	Neurog	trib2
acin1a	1.64797e-07	0.816486	0.886	0.75	0.00321388	Neurog	acin1a
rps29	1.88006e-07	0.751844	0.909	0.69	0.00366648	Neurog	rps29
jhy	2.21171e-07	0.473174	0.182	0.035	0.00431329	Neurog	jhy
brd2a	3.88941e-07	0.932621	0.886	0.749	0.00758514	Neurog	brd2a
gadd45gb.1	1.22202e-06	1.36357	0.318	0.105	0.0238319	Neurog	gadd45gb.1
rps13	1.22427e-06	0.727619	0.727	0.482	0.0238757	Neurog	rps13
dla	1.59872e-06	0.896282	0.591	0.327	0.0311783	Neurog	dla
gmps1	1.62932e-06	0.742167	0.75	0.5	0.0317749	Neurog	gmps
rps12	1.99866e-06	0.74974	0.864	0.731	0.0389779	Neurog	rps12
BX530077.1	2.23427e-06	0.495158	0.205	0.047	0.0435727	Neurog	BX530077.1
si:dkey-151g10.61	2.71568e-06	0.622565	1	0.922	0.0529612	Neurog	si:dkey-151g10.6
sox4a	2.89772e-06	0.625815	0.432	0.171	0.0565113	Neurog	sox4a
rpl37.11	4.08238e-06	0.789681	0.909	0.755	0.0796146	Neurog	rpl37.1
polr2a	4.33307e-06	0.588891	0.659	0.376	0.0845036	Neurog	polr2a
rpl391	5.07435e-06	0.85298	0.818	0.668	0.09896	Neurog	rpl39
rpl362	5.54663e-06	0.649086	0.841	0.7	0.10817	Neurog	rpl36
usf1l	6.26193e-06	0.609858	0.5	0.25	0.12212	Neurog	usf1l
dido1	7.67082e-06	0.68485	0.841	0.683	0.149596	Neurog	dido1
si:dkey-117m1.4	8.5052e-06	0.523141	0.409	0.174	0.165868	Neurog	si:dkey-117m1.4
hnrnpabb	1.1577e-05	0.686261	0.682	0.488	0.225774	Neurog	hnrnpabb
mki67	1.68453e-05	1.08205	0.818	0.698	0.328518	Neurog	mki67
eef2b	1.91344e-05	0.637679	0.932	0.842	0.373159	Neurog	eef2b
ccdc142	3.24218e-05	0.52519	0.273	0.096	0.632291	Neurog	ccdc142
nenf	5.32938e-05	0.358494	0.25	0.085	1	Neurog	nenf
tpt1	5.34545e-05	0.587127	0.773	0.616	1	Neurog	tpt1
hsp90ab11	5.82528e-05	0.625478	0.909	0.821	1	Neurog	hsp90ab1
e2f31	5.86586e-05	0.530066	0.795	0.561	1	Neurog	e2f3
faua1	6.45627e-05	0.726599	0.682	0.494	1	Neurog	faua
ncl2	9.05011e-05	0.686941	0.75	0.708	1	Neurog	ncl
oga	0.000106622	0.646631	0.659	0.462	1	Neurog	oga
dlb	0.000112672	0.284532	0.273	0.094	1	Neurog	dlb
tmem131l	0.000125607	0.675306	0.659	0.49	1	Neurog	tmem131l
nkain1	0.000141981	0.465061	0.386	0.187	1	Neurog	nkain1
rpl35a	0.000164823	0.763854	0.705	0.563	1	Neurog	rpl35a
rps5	0.000189049	0.598196	0.705	0.611	1	Neurog	rps5
rps15a	0.000218654	0.656091	0.682	0.599	1	Neurog	rps15a
mat2aa1	0.000226214	0.617026	0.591	0.447	1	Neurog	mat2aa
atrx	0.000265455	0.559002	0.909	0.824	1	Neurog	atrx
rpl211	0.000269929	0.447518	0.75	0.607	1	Neurog	rpl21
thbs1b	0.000316944	0.274066	0.114	0.026	1	Neurog	thbs1b
fbxl18	0.000352842	0.324118	0.159	0.047	1	Neurog	fbxl18
phf20a	0.000446526	0.259783	0.205	0.07	1	Neurog	phf20a
bzw1b	0.000506851	0.393735	0.364	0.181	1	Neurog	bzw1b
acvr1ba	0.000608447	0.305666	0.273	0.114	1	Neurog	acvr1ba
pbxip1a	0.000736842	0.465702	0.273	0.12	1	Neurog	pbxip1a
zdhhc17	0.000753665	0.417019	0.273	0.117	1	Neurog	zdhhc17
pard6b	0.000810773	0.301587	0.205	0.075	1	Neurog	pard6b
neurog1	0.000887645	0.398045	0.136	0.039	1	Neurog	neurog1
rpl13a	0.000984505	0.737963	0.636	0.544	1	Neurog	rpl13a
slc16a9b	0.000992454	0.329484	0.273	0.114	1	Neurog	slc16a9b
CABZ01058721.1	0.00101777	0.260922	0.205	0.074	1	Neurog	CABZ01058721.1
si:ch211-222l21.11	0.00105304	0.390016	0.955	0.891	1	Neurog	si:ch211-222l21.1
uck2a	0.00106292	0.48089	0.386	0.215	1	Neurog	uck2a
cnn3b	0.00108383	0.368743	0.386	0.206	1	Neurog	cnn3b
rpl36a	0.00119667	0.613227	0.75	0.688	1	Neurog	rpl36a
acat2	0.00122174	0.384382	0.205	0.079	1	Neurog	acat2
cul3a	0.00126245	0.46814	0.523	0.342	1	Neurog	cul3a
rpl7a1	0.00128194	0.337522	0.841	0.673	1	Neurog	rpl7a
ypel1	0.00130492	0.267394	0.295	0.132	1	Neurog	ypel1
rpl32	0.00137326	0.526289	0.727	0.651	1	Neurog	rpl32
reep2	0.00139943	0.274662	0.273	0.119	1	Neurog	reep2
tent5ba	0.00140371	0.372009	0.182	0.065	1	Neurog	tent5ba
atad5a1	0.00140435	0.461075	0.568	0.404	1	Neurog	atad5a
hnrnpl	0.00154517	0.482631	0.682	0.55	1	Neurog	hnrnpl
cdc34b	0.00155893	0.394938	0.432	0.24	1	Neurog	cdc34b
rab2a	0.00159776	0.44916	0.409	0.231	1	Neurog	rab2a
rpl30	0.00170949	0.47928	0.568	0.396	1	Neurog	rpl30
rpl121	0.00174762	0.494197	0.705	0.587	1	Neurog	rpl12
h3f3b.11	0.0018956	0.494298	0.591	0.436	1	Neurog	h3f3b.1
sucla2	0.00205724	0.315304	0.273	0.127	1	Neurog	sucla2
fnbp1l1	0.00236981	0.469936	0.545	0.427	1	Neurog	fnbp1l
rps111	0.00253829	0.627627	0.614	0.471	1	Neurog	rps11
sema4bb	0.0027857	0.657797	0.477	0.333	1	Neurog	sema4bb
hif1al	0.00284317	0.488428	0.432	0.271	1	Neurog	hif1al
zgc:153990	0.00299632	0.263774	0.182	0.07	1	Neurog	zgc:153990
rpl35	0.00305023	0.47561	0.705	0.609	1	Neurog	rpl35
rps18	0.00306606	0.442272	0.795	0.658	1	Neurog	rps18
rftn2	0.00312061	0.25491	0.273	0.124	1	Neurog	rftn2
rfng	0.00316653	0.417655	0.409	0.248	1	Neurog	rfng
pcdh18b	0.00317582	0.297746	0.25	0.113	1	Neurog	pcdh18b
paics1	0.00327522	0.59215	0.432	0.283	1	Neurog	paics
rps28	0.00372593	0.381816	0.705	0.649	1	Neurog	rps28
ier5l	0.00383432	0.622801	0.318	0.18	1	Neurog	ier5l
rps252	0.00386862	0.379098	0.773	0.612	1	Neurog	rps25
ctps1a1	0.00392017	0.419492	0.773	0.687	1	Neurog	ctps1a
aldh4a1	0.0045739	0.342322	0.227	0.106	1	Neurog	aldh4a1
srsf5a	0.00464018	0.477682	0.636	0.547	1	Neurog	srsf5a
cd99l2	0.00466347	0.436135	0.477	0.314	1	Neurog	cd99l2
rif1	0.00490244	0.518432	0.477	0.33	1	Neurog	rif1
her15.1	0.005058	0.757372	0.477	0.322	1	Neurog	her15.1
alcamb	0.00512755	0.442092	0.705	0.591	1	Neurog	alcamb
etv5a	0.00517645	0.545355	0.432	0.289	1	Neurog	etv5a
mcm6	0.00523565	0.483795	0.5	0.345	1	Neurog	mcm6
rpl381	0.00546004	0.405386	0.773	0.684	1	Neurog	rpl38
rpl10a2	0.0056822	0.405642	0.818	0.776	1	Neurog	rpl10a
mat2b	0.00569993	0.27202	0.25	0.12	1	Neurog	mat2b
rplp1	0.00597482	0.402102	0.864	0.789	1	Neurog	rplp1
tle3b2	0.00623164	0.377653	0.5	0.345	1	Neurog	tle3b
pprc11	0.00626525	0.458283	0.477	0.316	1	Neurog	pprc1
rps61	0.00650326	0.485058	0.682	0.644	1	Neurog	rps6
zgc:113263	0.00650574	0.295639	0.432	0.263	1	Neurog	zgc:113263
rps27a	0.00667715	0.484228	0.705	0.645	1	Neurog	rps27a
rpl23	0.00686078	0.67203	0.682	0.604	1	Neurog	rpl23
ugcg	0.00753141	0.307829	0.523	0.36	1	Neurog	ugcg
timm17a	0.0080569	0.342941	0.136	0.052	1	Neurog	timm17a
sms	0.00812696	0.27928	0.295	0.156	1	Neurog	sms
amd1	0.00993818	0.523784	0.455	0.324	1	Neurog	amd1
xpo1a	0.00999519	0.364231	0.636	0.525	1	Neurog	xpo1a
col14a1a1	2.98627e-23	1.28049	0.681	0.202	5.82382e-19	r1	col14a1a
nr2f1b	9.89094e-22	1.05854	0.464	0.103	1.92893e-17	r1	nr2f1b
nrp2a1	1.75313e-21	0.845685	0.391	0.074	3.41896e-17	r1	nrp2a
bmpr1ba1	1.34158e-20	1.1381	0.826	0.371	2.61636e-16	r1	bmpr1ba
col5a3a	1.21304e-17	0.396414	0.42	0.098	2.36566e-13	r1	col5a3a
efna2a5	4.79438e-17	1.72542	0.841	0.569	9.34999e-13	r1	efna2a
sfrp51	2.62754e-16	1.06296	0.478	0.14	5.12423e-12	r1	sfrp5
sfrp1a	4.26008e-15	0.713792	0.435	0.126	8.30802e-11	r1	sfrp1a
adgrl2a3	1.14415e-14	0.81551	0.971	0.859	2.23132e-10	r1	adgrl2a
adamts3	4.41244e-14	0.832677	0.609	0.227	8.60514e-10	r1	adamts3
sesn31	7.01588e-14	0.591395	0.377	0.096	1.36824e-09	r1	sesn3
ptprn28	1.07478e-12	0.819777	0.884	0.532	2.09603e-08	r1	ptprn2
gas7a5	2.6977e-12	0.591203	0.522	0.189	5.26105e-08	r1	gas7a
rasal21	7.31676e-11	0.835381	0.942	0.789	1.42692e-06	r1	rasal2
pdzrn3b	3.19905e-10	0.707022	0.362	0.121	6.2388e-06	r1	pdzrn3b
fgfr24	5.88201e-10	0.747879	0.942	0.813	1.14711e-05	r1	fgfr2
hs2st1b1	2.13232e-09	0.946758	0.71	0.391	4.15845e-05	r1	hs2st1b
vegfaa2	1.35725e-08	0.365038	0.232	0.062	0.000264691	r1	vegfaa
ptprnb4	1.80906e-08	0.695895	0.768	0.495	0.000352802	r1	ptprnb
adcy2a	3.57162e-08	0.31287	0.188	0.045	0.000696537	r1	adcy2a
robo4	3.99982e-08	0.567147	0.507	0.224	0.000780045	r1	robo4
st8sia21	8.08074e-08	0.504335	0.594	0.306	0.00157591	r1	st8sia2
ptprna2	1.09612e-07	0.5254	0.725	0.429	0.00213765	r1	ptprna
si:ch211-286o17.13	2.8448e-07	0.776802	0.594	0.361	0.00554793	r1	si:ch211-286o17.1
pou3f3b3	3.08397e-07	0.496279	0.522	0.27	0.00601435	r1	pou3f3b
efnb2a1	3.86172e-07	0.432548	0.449	0.205	0.00753113	r1	efnb2a
lamb2l1	4.71588e-07	0.483142	0.681	0.382	0.0091969	r1	lamb2l
irx1b	8.20667e-07	0.399474	0.319	0.123	0.0160047	r1	irx1b
pcdh19	8.4664e-07	0.672969	0.957	0.789	0.0165112	r1	pcdh19
lrp5	9.83327e-07	0.460573	0.899	0.71	0.0191768	r1	lrp5
tcf7l1a1	1.06785e-06	0.554728	0.768	0.498	0.0208252	r1	tcf7l1a
robo11	1.07838e-06	0.511652	0.986	0.88	0.0210305	r1	robo1
sema5ba1	1.1049e-06	0.559303	0.783	0.509	0.0215477	r1	sema5ba
celf21	1.29677e-06	0.531272	0.638	0.371	0.0252896	r1	celf2
plp1a1	2.73582e-06	0.558148	0.754	0.511	0.053354	r1	plp1a
nr2f21	2.7982e-06	0.608801	0.623	0.359	0.0545704	r1	nr2f2
srgap1a2	3.41703e-06	0.475084	0.884	0.7	0.0666389	r1	srgap1a
lamb2	3.53402e-06	0.583486	0.42	0.205	0.0689204	r1	lamb2
klf12b2	4.78525e-06	0.428109	0.348	0.156	0.0933219	r1	klf12b
etv43	5.07837e-06	0.670111	0.362	0.168	0.0990384	r1	etv4
scube22	6.33854e-06	0.584296	0.623	0.384	0.123614	r1	scube2
jag2b5	7.62665e-06	0.542279	0.899	0.839	0.148735	r1	jag2b
sox131	1.27456e-05	0.774305	0.754	0.61	0.248565	r1	sox13
si:dkey-244a7.12	1.6751e-05	0.30202	0.594	0.335	0.326678	r1	si:dkey-244a7.1
lrig11	2.76591e-05	0.392569	0.884	0.697	0.539408	r1	lrig1
fgfrl1a2	3.41526e-05	0.308917	0.333	0.147	0.666043	r1	fgfrl1a
zgc:110540	3.76687e-05	0.316629	0.362	0.174	0.734615	r1	zgc:110540
ephb2b2	5.08556e-05	0.503464	0.522	0.309	0.991786	r1	ephb2b
chl1b	6.37208e-05	0.354454	0.522	0.284	1	r1	chl1b
tet31	6.5076e-05	0.437498	0.87	0.706	1	r1	tet3
fgfr1a3	6.84187e-05	0.492841	0.739	0.597	1	r1	fgfr1a
thrb	8.25471e-05	0.352623	0.377	0.191	1	r1	thrb
emsy	8.85524e-05	0.27743	0.261	0.11	1	r1	emsy
egfra	9.58745e-05	0.358646	0.261	0.112	1	r1	egfra
cntfr	0.000102485	0.303549	0.986	0.857	1	r1	cntfr
efnb3b	0.000116025	0.339749	0.884	0.669	1	r1	efnb3b
lsm7	0.000164063	0.280495	0.304	0.148	1	r1	lsm7
rhoac	0.000184791	0.25459	0.275	0.126	1	r1	rhoac
shcbp11	0.000233924	0.281738	0.377	0.198	1	r1	shcbp1
jarid2b	0.000237199	0.391078	0.971	0.937	1	r1	jarid2b
smc4	0.000240241	0.336457	0.623	0.433	1	r1	smc4
pard6gb1	0.000244831	0.461119	0.565	0.399	1	r1	pard6gb
mier1a	0.000251835	0.289564	0.435	0.249	1	r1	mier1a
nova21	0.000270519	0.277378	0.986	0.95	1	r1	nova2
plekhg7	0.000285605	0.310641	0.333	0.168	1	r1	plekhg7
lin28a1	0.000310205	0.467903	0.812	0.656	1	r1	lin28a
ints8	0.000311308	0.346571	0.957	0.833	1	r1	ints8
sorbs2b	0.000424899	0.500727	0.449	0.275	1	r1	sorbs2b
cmtr1	0.000531537	0.299864	0.362	0.205	1	r1	cmtr1
rrm2.1	0.000611103	0.551908	0.696	0.585	1	r1	rrm2.1
sdk1b	0.000723642	0.369078	0.319	0.169	1	r1	sdk1b
EML5	0.000723796	0.345849	0.304	0.164	1	r1	EML5
trmt1l	0.000876239	0.25405	0.261	0.127	1	r1	trmt1l
skp2	0.000907405	0.340911	0.406	0.256	1	r1	skp2
pknox1.1	0.0011915	0.279441	0.348	0.199	1	r1	pknox1.1
fat3a1	0.00130961	0.289948	0.841	0.75	1	r1	fat3a
ankrd11	0.00137719	0.323181	0.913	0.867	1	r1	ankrd11
pax7a3	0.00153483	0.637864	0.275	0.14	1	r1	pax7a
srgap2	0.00184631	0.388187	0.942	0.837	1	r1	srgap2
si:ch73-376l24.2	0.00191023	0.290399	0.696	0.529	1	r1	si:ch73-376l24.2
epc1b	0.00197326	0.34076	0.493	0.353	1	r1	epc1b
si:ch211-276i12.11	0.00243911	0.258843	0.217	0.106	1	r1	si:ch211-276i12.11
mn1a	0.0024464	0.283397	0.348	0.205	1	r1	mn1a
fbxw7	0.00256853	0.300973	0.971	0.944	1	r1	fbxw7
nat8l	0.0026636	0.464333	0.754	0.629	1	r1	nat8l
si:ch1073-186i23.1	0.00280836	0.27101	0.406	0.253	1	r1	si:ch1073-186i23.1
greb11	0.00299718	0.385914	0.725	0.659	1	r1	greb1
zbtb16a3	0.00315798	0.378499	0.971	0.917	1	r1	zbtb16a
macf1a	0.00320864	0.414618	0.87	0.799	1	r1	macf1a
klhl24a	0.00322753	0.261653	0.29	0.16	1	r1	klhl24a
shroom4	0.00345536	0.396427	0.594	0.48	1	r1	shroom4
hs3st3b1b4	0.00361611	0.258716	0.681	0.504	1	r1	hs3st3b1b
dock1	0.00364143	0.393312	0.783	0.728	1	r1	dock1
tube1	0.00487397	0.305296	0.217	0.112	1	r1	tube1
ncapg2	0.0049787	0.25233	0.232	0.123	1	r1	ncapg2
hephl1a2	0.00499586	0.305991	0.333	0.212	1	r1	hephl1a
arhgef10la	0.00518993	0.301664	0.594	0.436	1	r1	arhgef10la
orc31	0.00564002	0.3315	0.493	0.372	1	r1	orc3
hs6st1b	0.0084347	0.306218	0.348	0.217	1	r1	hs6st1b
znf5363	0.00865748	0.267032	0.232	0.126	1	r1	znf536
sulf2b	0.00916866	0.446285	0.217	0.119	1	r1	sulf2b
map2k6	0.00925493	0.261824	0.609	0.473	1	r1	map2k6
aff23	0.00947476	0.313366	0.609	0.442	1	r1	aff2
ccne23	0.00975213	0.352379	0.522	0.407	1	r1	ccne2
skap2	2.48306e-49	1.05484	0.612	0.08	4.84245e-45	r2	skap2
mpz	1.78755e-30	1.22104	0.642	0.144	3.48608e-26	r2	mpz
CT990561.1	2.83715e-30	1.47618	0.746	0.209	5.533e-26	r2	CT990561.1
vgll3	7.01004e-30	0.621939	0.254	0.022	1.3671e-25	r2	vgll3
pax6a1	1.44016e-24	1.22344	0.791	0.266	2.8086e-20	r2	pax6a
LHFPL6	6.18138e-22	0.776708	0.463	0.098	1.20549e-17	r2	LHFPL6
cyp26b1	7.13106e-21	0.900884	0.433	0.088	1.3907e-16	r2	cyp26b1
hoxa2b	8.57699e-21	0.531674	0.373	0.069	1.67268e-16	r2	hoxa2b
bmpr1ba2	9.59589e-21	0.999307	0.866	0.37	1.87139e-16	r2	bmpr1ba
nr2f22	3.65799e-20	1.10633	0.836	0.353	7.13382e-16	r2	nr2f2
lrig12	1.0137e-18	1.13623	0.925	0.696	1.97692e-14	r2	lrig1
auts2b1	1.02102e-18	1.02105	0.821	0.386	1.9912e-14	r2	auts2b
cxcl12a	1.3435e-18	0.87935	0.582	0.173	2.62009e-14	r2	cxcl12a
ppap2d3	8.21531e-18	0.694178	0.478	0.123	1.60215e-13	r2	ppap2d
epha71	1.9729e-17	0.906695	0.91	0.455	3.84756e-13	r2	epha7
si:dkey-27i16.2	2.96251e-17	0.333628	0.224	0.03	5.77749e-13	r2	si:dkey-27i16.2
pax7b	4.23105e-17	1.28145	0.522	0.155	8.25139e-13	r2	pax7b
ndst3	2.55248e-16	1.00467	0.716	0.303	4.97785e-12	r2	ndst3
tgfbr2b	8.04064e-16	0.410374	0.239	0.038	1.56809e-11	r2	tgfbr2b
atp1a2a	3.34287e-15	0.43176	0.284	0.053	6.51926e-11	r2	atp1a2a
ptprfb	6.40977e-15	0.885627	1	0.931	1.25003e-10	r2	ptprfb
cntfr1	1.07153e-14	1.00845	0.985	0.857	2.08971e-10	r2	cntfr
cyp26c1	3.46104e-14	0.677736	0.478	0.14	6.74971e-10	r2	cyp26c1
chl1b1	7.45842e-14	0.844106	0.687	0.279	1.45454e-09	r2	chl1b
fstl1b	8.76165e-14	0.925199	0.836	0.497	1.7087e-09	r2	fstl1b
irx3a	4.08308e-13	0.466768	0.478	0.148	7.96283e-09	r2	irx3a
shroom41	6.25395e-13	0.786894	0.791	0.474	1.21965e-08	r2	shroom4
ephb2b3	9.88585e-13	0.733078	0.687	0.304	1.92794e-08	r2	ephb2b
plxna23	2.50224e-12	0.575317	0.657	0.262	4.87987e-08	r2	plxna2
plp1a2	4.64252e-12	0.894834	0.866	0.508	9.05384e-08	r2	plp1a
zgc:1748881	9.67902e-12	0.464823	0.284	0.068	1.8876e-07	r2	zgc:174888
robo41	1.10675e-11	0.776368	0.582	0.222	2.15838e-07	r2	robo4
SFMBT1	1.33013e-11	0.569215	0.448	0.157	2.59402e-07	r2	SFMBT1
sdk1b1	5.12054e-11	0.525814	0.478	0.164	9.98607e-07	r2	sdk1b
col2a1a	1.05135e-10	0.39205	0.612	0.254	2.05034e-06	r2	col2a1a
si:dkey-49n23.12	1.475e-10	0.634806	0.448	0.16	2.87654e-06	r2	si:dkey-49n23.1
adgrv13	1.51607e-10	0.693456	0.97	0.767	2.95663e-06	r2	adgrv1
gli2b	1.63614e-10	0.570865	0.731	0.369	3.19079e-06	r2	gli2b
nrarpb1	1.85693e-10	0.606806	0.627	0.301	3.62139e-06	r2	nrarpb
tnc	4.27159e-10	0.49017	0.418	0.141	8.33046e-06	r2	tnc
lamb21	4.38393e-10	0.511777	0.522	0.203	8.54955e-06	r2	lamb2
igf2b2	6.72413e-10	0.48396	0.433	0.151	1.31134e-05	r2	igf2b
sorbs2b1	1.81237e-09	0.742145	0.582	0.271	3.53448e-05	r2	sorbs2b
pou3f3b4	1.87871e-09	0.539959	0.582	0.268	3.66386e-05	r2	pou3f3b
si:ch211-286o17.14	2.46539e-09	0.512381	0.716	0.357	4.808e-05	r2	si:ch211-286o17.1
LO018022.1	2.85886e-09	0.299889	0.358	0.114	5.57534e-05	r2	LO018022.1
dtnba	3.77106e-09	0.590591	0.791	0.469	7.35431e-05	r2	dtnba
rassf7a1	4.7026e-09	0.556197	0.716	0.361	9.17102e-05	r2	rassf7a
rasal22	6.31678e-09	0.573326	0.955	0.789	0.00012319	r2	rasal2
irx5a	6.49611e-09	0.313792	0.284	0.083	0.000126687	r2	irx5a
cyp2p7	7.02273e-09	0.406245	0.343	0.115	0.000136957	r2	cyp2p7
slc25a21	7.41797e-09	0.716095	0.597	0.304	0.000144665	r2	slc25a21
mn1b	7.93984e-09	0.366348	0.358	0.122	0.000154843	r2	mn1b
epha4b1	8.02358e-09	0.72964	0.821	0.537	0.000156476	r2	epha4b
kirrel3l1	1.07452e-08	0.646757	0.836	0.46	0.000209553	r2	kirrel3l
ddr1	2.66477e-08	0.657441	0.836	0.56	0.000519684	r2	ddr1
usp28	3.292e-08	0.291699	0.194	0.045	0.000642006	r2	usp28
jag2b6	4.55083e-08	0.468034	1	0.836	0.000887502	r2	jag2b
magi2a	1.02185e-07	0.337698	0.687	0.359	0.00199281	r2	magi2a
nbeab	1.3717e-07	0.278362	0.269	0.083	0.00267508	r2	nbeab
efnb3b1	1.37783e-07	0.548767	0.925	0.668	0.00268704	r2	efnb3b
mylk2	2.58261e-07	0.469342	0.448	0.197	0.00503661	r2	mylk2
acsl2	2.61153e-07	0.495494	0.746	0.42	0.005093	r2	acsl2
sema5ba2	2.9927e-07	0.538947	0.821	0.508	0.00583636	r2	sema5ba
BX324164.5	3.38067e-07	0.384791	0.463	0.21	0.00659298	r2	BX324164.5
marcksl1a2	3.84895e-07	0.685729	0.687	0.441	0.00750623	r2	marcksl1a
zbtb16a4	3.96429e-07	0.694937	0.985	0.916	0.00773116	r2	zbtb16a
rgs3b	4.01864e-07	0.440999	0.463	0.213	0.00783714	r2	rgs3b
neo1b	5.3721e-07	0.412424	0.776	0.47	0.0104767	r2	neo1b
pax7a4	5.39724e-07	0.966744	0.343	0.138	0.0105257	r2	pax7a
pdlim1	5.54602e-07	0.362172	0.269	0.089	0.0108158	r2	pdlim1
rasl11b	5.5958e-07	0.289151	0.239	0.075	0.0109129	r2	rasl11b
grasp	6.78732e-07	0.541824	0.358	0.147	0.0132366	r2	grasp
sox21b	8.29968e-07	0.250597	0.224	0.068	0.016186	r2	sox21b
mapk111	8.59834e-07	0.460422	0.537	0.274	0.0167685	r2	mapk11
celf22	1.06271e-06	0.654071	0.657	0.371	0.0207249	r2	celf2
lrp51	1.07598e-06	0.555202	0.851	0.712	0.0209837	r2	lrp5
egfl6	1.07799e-06	0.305352	0.448	0.202	0.021023	r2	egfl6
lhfpl2b	1.08869e-06	0.276478	0.403	0.167	0.0212317	r2	lhfpl2b
tead1b	1.10385e-06	0.53635	0.731	0.485	0.0215273	r2	tead1b
hs6st1b1	1.26779e-06	0.463723	0.448	0.214	0.0247244	r2	hs6st1b
tnrc6c1	1.36066e-06	0.397733	0.776	0.483	0.0265357	r2	tnrc6c1
CR848788.2	1.43177e-06	0.30372	0.343	0.136	0.0279224	r2	CR848788.2
mn1a1	1.45968e-06	0.542506	0.433	0.202	0.0284667	r2	mn1a
meis2a.1	1.74449e-06	0.501763	0.612	0.36	0.0340211	r2	meis2a.1
ttc6	2.18418e-06	0.309726	0.269	0.093	0.0425958	r2	ttc6
robo12	2.58899e-06	0.478875	0.955	0.881	0.0504906	r2	robo1
ccnd2a2	2.60531e-06	0.385476	0.597	0.324	0.0508087	r2	ccnd2a
hs2st1b2	2.76501e-06	0.378132	0.657	0.393	0.0539232	r2	hs2st1b
arhgef10lb	3.29803e-06	0.481238	0.612	0.345	0.0643182	r2	arhgef10lb
fbxl4	3.64776e-06	0.268253	0.284	0.104	0.0711386	r2	fbxl4
diaph3	3.98625e-06	0.439382	0.731	0.477	0.0777398	r2	diaph3
srgap21	4.23875e-06	0.431867	0.94	0.837	0.082664	r2	srgap2
cercam	4.37755e-06	0.369127	0.507	0.253	0.085371	r2	cercam
hmgb2a	5.61833e-06	0.465674	0.866	0.674	0.109569	r2	hmgb2a
nr2f1b1	6.09246e-06	0.500192	0.284	0.108	0.118815	r2	nr2f1b
irx1a	6.11089e-06	0.285044	0.254	0.092	0.119175	r2	irx1a
htr3b	6.19078e-06	0.361725	0.209	0.068	0.120733	r2	htr3b
gk5	6.6615e-06	0.324952	0.284	0.111	0.129913	r2	gk5
si:dkey-244a7.13	6.79799e-06	0.493556	0.567	0.336	0.132574	r2	si:dkey-244a7.1
si:dkey-35m8.1	8.52046e-06	0.687328	0.478	0.254	0.166166	r2	si:dkey-35m8.1
mad2l1	8.67073e-06	0.330482	0.522	0.268	0.169097	r2	mad2l1
tcf7l1a2	9.3524e-06	0.470248	0.716	0.5	0.18239	r2	tcf7l1a
pfkfb31	1.01307e-05	0.279275	0.328	0.135	0.197569	r2	pfkfb3
fkbp8	1.01665e-05	0.258396	0.328	0.136	0.198267	r2	fkbp8
tmsb4x	1.12597e-05	0.70075	0.761	0.583	0.219587	r2	tmsb4x
plekhh1	1.2667e-05	0.329338	0.94	0.713	0.247032	r2	plekhh1
fam102aa	1.33532e-05	0.351913	0.507	0.267	0.260415	r2	fam102aa
marcksl1b1	1.38073e-05	0.458134	0.657	0.421	0.269271	r2	marcksl1b
hs3st3b1b5	1.43443e-05	0.385893	0.761	0.502	0.279742	r2	hs3st3b1b
vwa71	1.6199e-05	0.387259	0.358	0.16	0.315912	r2	vwa7
mlxip	1.89297e-05	0.322981	0.597	0.342	0.369168	r2	mlxip
kif9	2.08882e-05	0.260817	0.239	0.087	0.407362	r2	kif9
ogdha	2.23644e-05	0.525136	0.597	0.363	0.436151	r2	ogdha
fosl22	2.27873e-05	0.419301	0.328	0.147	0.444398	r2	fosl2
pknox21	2.43892e-05	0.437106	0.478	0.251	0.475639	r2	pknox2
crebrf	2.60674e-05	0.290978	0.358	0.165	0.508367	r2	crebrf
sh2d3ca	3.07826e-05	0.393965	0.522	0.301	0.600323	r2	sh2d3ca
pvrl2l1	3.22312e-05	0.411823	0.925	0.72	0.628573	r2	pvrl2l
cgnl1	3.67569e-05	0.635904	0.731	0.542	0.716833	r2	cgnl1
rab1ab	4.15789e-05	0.272455	0.239	0.094	0.810872	r2	rab1ab
si:dkey-195m11.8	4.37845e-05	0.433053	0.761	0.583	0.853886	r2	si:dkey-195m11.8
nsl1	4.6649e-05	0.250752	0.254	0.102	0.909748	r2	nsl1
zeb2b	4.83046e-05	0.36767	0.507	0.279	0.942036	r2	zeb2b
dbx1a	5.30243e-05	0.255217	0.119	0.031	1	r2	dbx1a
lin28a2	5.3215e-05	0.465031	0.836	0.655	1	r2	lin28a
wwc3	5.78105e-05	0.354437	0.507	0.306	1	r2	wwc3
sox6	5.91061e-05	0.365837	0.418	0.218	1	r2	sox6
nr2f5	5.93535e-05	0.369526	0.791	0.537	1	r2	nr2f5
nav2a3	6.06394e-05	0.39887	0.642	0.423	1	r2	nav2a
tacc31	6.13855e-05	0.264746	0.463	0.241	1	r2	tacc3
mapk12b	6.21718e-05	0.367244	0.433	0.239	1	r2	mapk12b
dnajb2	6.4148e-05	0.353547	0.358	0.172	1	r2	dnajb2
stag2b	6.46598e-05	0.448125	0.776	0.578	1	r2	stag2b
ptprna3	6.51888e-05	0.388608	0.672	0.431	1	r2	ptprna
zc3h4	6.74517e-05	0.315164	0.582	0.337	1	r2	zc3h4
epb41a	7.41981e-05	0.400884	0.91	0.677	1	r2	epb41a
tpx2	7.72942e-05	0.419665	0.612	0.412	1	r2	tpx2
crybg1a	7.81465e-05	0.413213	0.418	0.226	1	r2	crybg1a
gpm6bb	8.4055e-05	0.357141	0.582	0.35	1	r2	gpm6bb
cep192	8.64754e-05	0.338411	0.657	0.427	1	r2	cep192
scarb2a	9.0712e-05	0.409459	0.701	0.49	1	r2	scarb2a
gtse1	9.07649e-05	0.307316	0.388	0.199	1	r2	gtse1
mex3b3	0.000100638	0.275101	0.612	0.375	1	r2	mex3b
stat33	0.000103682	0.789806	0.731	0.559	1	r2	stat3
cadm1a	0.00010607	0.458064	0.896	0.765	1	r2	cadm1a
si:dkey-151g10.3	0.000106291	0.403661	0.642	0.43	1	r2	si:dkey-151g10.3
crim11	0.000112359	0.369881	0.224	0.088	1	r2	crim1
b4galnt4a	0.000116958	0.28558	0.328	0.152	1	r2	b4galnt4a
opn1sw2	0.000117157	0.257983	0.254	0.108	1	r2	opn1sw2
meis1b	0.000117823	0.52076	0.851	0.708	1	r2	meis1b
pou3f1	0.000118166	0.318404	0.343	0.165	1	r2	pou3f1
hspa4a	0.000122071	0.436588	0.642	0.433	1	r2	hspa4a
tet32	0.00013409	0.415765	0.881	0.705	1	r2	tet3
crema	0.000144536	0.337094	0.328	0.16	1	r2	crema
atf4b	0.00015004	0.286009	0.612	0.387	1	r2	atf4b
cenpe1	0.000151051	0.376097	0.537	0.328	1	r2	cenpe
si:ch73-280o22.21	0.00016547	0.349067	0.463	0.269	1	r2	si:ch73-280o22.2
ppp6r3	0.000168753	0.302626	0.672	0.463	1	r2	ppp6r3
cdc14b1	0.000171157	0.389709	0.731	0.546	1	r2	cdc14b
dennd2da	0.00017535	0.362098	0.388	0.207	1	r2	dennd2da
atf31	0.000217246	0.611582	0.463	0.275	1	r2	atf3
ehmt1b	0.000219312	0.380286	0.642	0.433	1	r2	ehmt1b
rnd3a1	0.000225805	0.312531	0.612	0.37	1	r2	rnd3a
tmcc3	0.000230366	0.343911	0.642	0.42	1	r2	tmcc3
map3k14a	0.000230716	0.318301	0.388	0.206	1	r2	map3k14a
fsta1	0.000243069	0.47612	0.358	0.184	1	r2	fsta
anln	0.00024914	0.261609	0.493	0.285	1	r2	anln
cnksr3	0.00025592	0.43326	0.657	0.47	1	r2	cnksr3
tuba8l	0.000285226	0.299566	0.776	0.583	1	r2	tuba8l
hsph11	0.000285907	0.369558	0.388	0.204	1	r2	hsph1
fndc3ba1	0.000289979	0.250856	0.896	0.702	1	r2	fndc3ba
eif2ak3	0.000310214	0.282376	0.284	0.133	1	r2	eif2ak3
FRMD5	0.000325276	0.296357	0.642	0.417	1	r2	FRMD5
diaph2	0.000363279	0.280881	0.896	0.67	1	r2	diaph2
adgrl2a4	0.000366616	0.286779	0.985	0.859	1	r2	adgrl2a
brdt2	0.000371839	0.396731	0.836	0.646	1	r2	brdt
fam172a	0.000384038	0.320147	0.761	0.545	1	r2	fam172a
ncoa1	0.000385924	0.316999	0.701	0.493	1	r2	ncoa1
eme1	0.000411167	0.347351	0.567	0.379	1	r2	eme1
ldb1b	0.000426091	0.271896	0.448	0.258	1	r2	ldb1b
galnt1	0.000431887	0.360726	0.672	0.448	1	r2	galnt1
dock12	0.000470478	0.447514	0.821	0.727	1	r2	dock1
tox3	0.000470829	0.268565	0.687	0.439	1	r2	tox3
gas7a6	0.000484108	0.348035	0.358	0.194	1	r2	gas7a
SBNO2	0.000507915	0.514187	0.313	0.166	1	r2	SBNO2
znf1153.1	0.000549282	0.25655	0.493	0.301	1	r2	znf1153.1
herc4	0.000554401	0.256785	0.522	0.325	1	r2	herc4
arhgap241	0.000568987	0.289096	0.284	0.135	1	r2	arhgap24
jdp2b	0.000576657	0.258297	0.284	0.138	1	r2	jdp2b
boc2	0.000613534	0.462484	0.881	0.74	1	r2	boc
skia6	0.000617983	0.349432	0.836	0.619	1	r2	skia
rab5c	0.000628867	0.250205	0.448	0.258	1	r2	rab5c
fabp3	0.000641207	0.251329	0.478	0.279	1	r2	fabp3
smad6b	0.000679973	0.32871	0.522	0.35	1	r2	smad6b
zgc:91976	0.000742752	0.272541	0.373	0.207	1	r2	zgc:91976
arhgef10la1	0.00075164	0.373138	0.612	0.436	1	r2	arhgef10la
ppp2r5a	0.000784645	0.306329	0.358	0.201	1	r2	ppp2r5a
ndnf	0.000899107	0.25573	0.284	0.14	1	r2	ndnf
hivep2a	0.000900852	0.400202	0.373	0.213	1	r2	hivep2a
sardh	0.000902178	0.347181	0.358	0.201	1	r2	sardh
ube2s	0.000920393	0.253376	0.433	0.248	1	r2	ube2s
eml11	0.000921971	0.271733	0.328	0.173	1	r2	eml1
brca2	0.000924548	0.303545	0.433	0.26	1	r2	brca2
crb2a7	0.000927156	0.271402	0.612	0.38	1	r2	crb2a
baz2ba	0.000984317	0.26201	0.955	0.883	1	r2	baz2ba
si:ch1073-186i23.11	0.000999341	0.287524	0.418	0.253	1	r2	si:ch1073-186i23.1
timmdc1	0.00114951	0.257132	0.388	0.22	1	r2	timmdc1
slc7a3a	0.00116878	0.380074	0.537	0.364	1	r2	slc7a3a
hmmr	0.00119534	0.355033	0.373	0.216	1	r2	hmmr
coro1ca1	0.00119556	0.608951	0.716	0.633	1	r2	coro1ca
tbl1xr1a	0.00121488	0.335156	0.896	0.796	1	r2	tbl1xr1a
mus81	0.00125001	0.254825	0.567	0.364	1	r2	mus81
rasa1a	0.0013255	0.333479	0.791	0.621	1	r2	rasa1a
fzd7a1	0.00134569	0.266779	0.418	0.25	1	r2	fzd7a
acvr2bb	0.001442	0.285016	0.642	0.449	1	r2	acvr2bb
dnmt1	0.00146299	0.307506	0.478	0.315	1	r2	dnmt1
myclb	0.00150264	0.437211	0.343	0.202	1	r2	myclb
ank2b	0.00152653	0.274282	0.761	0.546	1	r2	ank2b
edrf1	0.00156499	0.366308	0.493	0.322	1	r2	edrf1
ccnf	0.00165038	0.328821	0.672	0.479	1	r2	ccnf
schip11	0.00171798	0.250821	0.463	0.285	1	r2	schip1
pcnt	0.00182361	0.396384	0.597	0.449	1	r2	pcnt
pan3	0.00186168	0.285992	0.463	0.308	1	r2	pan3
adarb1b	0.00187252	0.353201	0.881	0.748	1	r2	adarb1b
arhgap12b	0.00189807	0.406606	0.672	0.513	1	r2	arhgap12b
tax1bp1b	0.00196513	0.350648	0.597	0.452	1	r2	tax1bp1b
abcb54	0.00211314	0.332033	0.448	0.271	1	r2	abcb5
il6st1	0.00215449	0.427898	0.418	0.263	1	r2	il6st
tenm43	0.00216612	0.739641	0.881	0.775	1	r2	tenm4
plk1	0.00218231	0.376867	0.537	0.374	1	r2	plk1
negr11	0.00222252	0.351108	0.881	0.715	1	r2	negr1
podxl1	0.00224753	0.299054	0.328	0.181	1	r2	podxl
dlgap5	0.002384	0.292187	0.746	0.585	1	r2	dlgap5
hmgn2	0.00242838	0.329799	0.687	0.54	1	r2	hmgn2
sugt11	0.00244746	0.262516	0.463	0.3	1	r2	sugt1
myh10	0.00251558	0.262095	0.746	0.598	1	r2	myh10
creb5b	0.00263664	0.426935	0.313	0.18	1	r2	creb5b
pcdh191	0.0027016	0.370558	0.94	0.79	1	r2	pcdh19
ripor13	0.00284069	0.355059	0.746	0.589	1	r2	ripor1
mtmr3	0.00295821	0.260068	0.448	0.298	1	r2	mtmr3
AXL	0.00306133	0.252111	0.299	0.171	1	r2	AXL
elmsan1b	0.00306981	0.387572	0.627	0.48	1	r2	elmsan1b
vash2	0.00307917	0.281621	0.537	0.358	1	r2	vash2
wwtr1	0.00312827	0.251848	0.478	0.311	1	r2	wwtr1
CABZ01058261.11	0.00314524	0.279312	0.522	0.365	1	r2	CABZ01058261.1
tet21	0.00327316	0.279231	0.701	0.536	1	r2	tet2
aff24	0.0033382	0.275255	0.612	0.442	1	r2	aff2
stk24b	0.00343312	0.320759	0.493	0.342	1	r2	stk24b
top2a2	0.003441	0.316682	0.612	0.452	1	r2	top2a
atf7ip	0.00344283	0.252456	0.881	0.714	1	r2	atf7ip
ncalda	0.00347739	0.256849	0.731	0.583	1	r2	ncalda
sox31	0.00361673	0.302923	0.522	0.369	1	r2	sox3
grip1	0.00372277	0.254421	0.522	0.355	1	r2	grip1
mbd3b4	0.00391506	0.354376	0.746	0.638	1	r2	mbd3b
rai14	0.00404747	0.288474	0.418	0.267	1	r2	rai14
uacab	0.004144	0.307668	0.373	0.23	1	r2	uacab
tpm4a2	0.00447602	0.274787	0.522	0.354	1	r2	tpm4a
igf2bp1	0.00478412	0.255514	0.925	0.903	1	r2	igf2bp1
papolg	0.00487868	0.290557	0.433	0.296	1	r2	papolg
mthfd1b	0.00524985	0.302383	0.433	0.293	1	r2	mthfd1b
shroom2a1	0.00526127	0.274254	0.463	0.316	1	r2	shroom2a
lpl	0.00572585	0.308656	0.358	0.223	1	r2	lpl
[truncated: 7,165 more rows]
