# Supplementary material for: scMultiome analysis identifies embryonic hindbrain progenitors with mixed rhombomere identities
Source: eLife. 2023 Nov 10;12:e87772. doi: 10.7554/eLife.87772 (PMC10662952; doi:10.7554/eLife.87772)
Supplement: Figure 6—source data 2. [file elife-87772-fig6-data2.xlsx]

## Sheet: 1 Description
	This workbook lists all TF binding motifs enriched in the indicated cluster, as follows:
	Sheet	Content
	1	Description
	2 to 36	List of all TF motifs enriched in the indicated cluster relative to all clusters present in the integrated neural data set (res5.0)
	The columns in each sheet contain the following information:
	Column	Information
	A	Motif ID
	B	p value
	C	fold change in motif enrichment between the specified cluster and all clusters; expressed as log2 of average for all cells in each cluster
	D	Percentage of cells in sample 1 containing motif
	E	Percentage of cells in sample 2 containing motif
	F	adjusted p value
	G	Motif ID
	H	Motif name

## Sheet: 2 CHB.1
	p_val	avg_log2FC	pct.1	pct.2	p_val_adj	motif	motif.name
MA0153.2	1.51364e-61	3.64404	0.97	0.413	2.49144e-58	MA0153.2	HNF1B
MA0046.2	1.95584e-47	3.6109	0.926	0.442	3.21931e-44	MA0046.2	HNF1A
MA1211.1	1.53945e-31	1.98734	0.859	0.459	2.53393e-28	MA1211.1	ATHB18
MA1210.1	6.4334e-31	1.64671	0.83	0.431	1.05894e-27	MA1210.1	HAT22
MA1024.1	1.30006e-29	2.23444	0.815	0.429	2.1399e-26	MA1024.1	HAT1
MA1499.1	9.50197e-29	2.11517	0.83	0.455	1.56403e-25	MA1499.1	HOXB4
MA1504.1	9.50197e-29	2.11517	0.83	0.455	1.56403e-25	MA1504.1	HOXC4
MA0951.1	1.08005e-27	1.31122	0.822	0.476	1.77776e-24	MA0951.1	ATHB-16
MA0110.3	1.18141e-26	1.92384	0.785	0.446	1.94461e-23	MA0110.3	ATHB-5
MA0751.1	5.31711e-26	1.35528	0.956	0.463	8.75197e-23	MA0751.1	ZIC4
MA0697.1	7.83446e-26	0.383017	0.963	0.459	1.28955e-22	MA0697.1	ZIC3
MA0696.1	8.16043e-26	0.90473	0.963	0.462	1.34321e-22	MA0696.1	ZIC1
MA1584.1	2.83349e-25	0.273913	0.926	0.458	4.66393e-22	MA1584.1	ZIC5
MA0456.1	3.13975e-25	0.474653	0.926	0.455	5.16803e-22	MA0456.1	opa
MA1629.1	8.55608e-25	1.88474	0.926	0.448	1.40833e-21	MA1629.1	Zic2
MA1639.1	1.45847e-22	0.883406	0.815	0.479	2.40065e-19	MA1639.1	MEIS1(var.2)
MA1406.1	1.94195e-22	1.5316	0.793	0.447	3.19644e-19	MA1406.1	ATHB4
MA0954.2	8.3545e-21	1.05745	0.822	0.448	1.37515e-17	MA0954.2	ATHB7
MA1628.1	2.60747e-19	0.516649	0.874	0.467	4.2919e-16	MA1628.1	Zic1::Zic2
MA1149.1	4.2334e-18	1.14595	0.837	0.436	6.96818e-15	MA1149.1	RARA::RXRG
MA0186.1	1.49783e-17	1.23418	0.8	0.446	2.46542e-14	MA0186.1	Dfd
MA0203.1	1.49783e-17	1.23418	0.8	0.446	2.46542e-14	MA0203.1	Scr
MA0215.1	1.49783e-17	1.23418	0.8	0.446	2.46542e-14	MA0215.1	btn
MA1496.1	1.71866e-16	0.952035	0.793	0.45	2.82891e-13	MA1496.1	HOXA4
MA1198.1	1.96193e-15	0.474361	0.763	0.469	3.22934e-12	MA1198.1	HAT2
MA0730.1	8.32442e-14	0.289126	0.822	0.458	1.3702e-10	MA0730.1	RARA(var.2)
MA0736.1	1.18315e-13	0.872647	0.719	0.454	1.94747e-10	MA0736.1	GLIS2
MA0858.1	4.04061e-12	0.734315	0.733	0.454	6.65085e-09	MA0858.1	Rarb(var.2)
MA1212.1	1.19958e-11	0.281759	0.741	0.482	1.97451e-08	MA1212.1	ATHB13
MA1471.1	4.79956e-11	0.800913	0.719	0.469	7.90008e-08	MA1471.1	BARX2
MA1548.1	5.86219e-10	1.28522	0.674	0.471	9.64917e-07	MA1548.1	PLAGL2
MA0159.1	2.89647e-09	0.640332	0.696	0.451	4.76759e-06	MA0159.1	RARA::RXRA
MA1421.1	3.02842e-09	0.594338	0.667	0.466	4.98477e-06	MA1421.1	TCF7L1
MA0070.1	6.28697e-08	0.392002	0.689	0.48	0.000103484	MA0070.1	PBX1
MA0116.1	9.85929e-07	0.31504	0.637	0.445	0.00162284	MA0116.1	Znf423
MA1430.1	1.77541e-06	1.01283	0.667	0.492	0.00292233	MA1430.1	TB1
MA0903.1	2.1146e-06	0.253201	0.644	0.478	0.00348063	MA0903.1	HOXB3
MA1284.1	1.93467e-05	0.529235	0.667	0.464	0.0318447	MA1284.1	TCP1
MA1291.1	3.479e-05	0.455486	0.667	0.482	0.0572644	MA1291.1	TCP7
MA1326.1	0.000207249	0.259838	0.615	0.485	0.341132	MA1326.1	ZHD5
MA1054.1	0.000228834	0.753025	0.585	0.486	0.37666	MA1054.1	ARALYDRAFT_897773
MA0279.1	0.000261543	0.705787	0.548	0.472	0.430499	MA0279.1	CAD1
MA0737.1	0.000297306	0.330998	0.541	0.473	0.489366	MA0737.1	GLIS3
MA1410.1	0.000389811	0.636802	0.607	0.49	0.641629	MA1410.1	StBRC1
MA0016.1	0.000608956	0.372564	0.615	0.5	1	MA0016.1	usp
MA1285.1	0.000764672	0.341341	0.6	0.476	1	MA1285.1	At2g45680
MA0628.1	0.00513505	0.346084	0.556	0.494	1	MA0628.1	POU6F1
MA1389.1	0.00552531	0.482039	0.526	0.486	1	MA1389.1	PHL1
MA1570.1	0.00564762	0.307357	0.585	0.484	1	MA1570.1	TFAP4(var.2)
MA0778.1	0.0056991	0.32793	0.585	0.461	1	MA0778.1	NFKB2
MA1283.1	0.00789962	0.267525	0.563	0.486	1	MA1283.1	TCP14
MA1165.1	0.0086291	0.464508	0.541	0.453	1	MA1165.1	HHO6
MA1287.1	0.00950821	0.291128	0.615	0.484	1	MA1287.1	TCP21
MA0281.1	0.0121334	0.678777	0.4	0.514	1	MA0281.1	CBF1
MA1359.1	0.0137137	1.0208	0.556	0.498	1	MA1359.1	bHLH31
MA1686.1	0.0188608	0.268674	0.585	0.474	1	MA1686.1	ARF13
MA1095.1	0.0200353	0.282067	0.541	0.483	1	MA1095.1	ARALYDRAFT_495258
MA1098.1	0.0200353	0.282067	0.541	0.483	1	MA1098.1	ARALYDRAFT_484486
MA1167.1	0.0210573	0.469861	0.578	0.497	1	MA1167.1	EFM
MA0409.1	0.0251848	0.373274	0.415	0.501	1	MA0409.1	TYE7
MA0895.1	0.0322065	0.410685	0.533	0.483	1	MA0895.1	HMBOX1
MA0960.1	0.0325711	1.19693	0.415	0.518	1	MA0960.1	BHLH104
MA1290.1	0.0490675	0.289746	0.541	0.497	1	MA1290.1	TCP17
MA1064.1	0.053044	0.254375	0.57	0.494	1	MA1064.1	TCP2
MA1434.1	0.0785044	0.263999	0.481	0.485	1	MA1434.1	NCU02182
MA0278.1	0.0792557	0.361039	0.526	0.449	1	MA0278.1	BAS1
MA1384.1	0.0859169	0.431959	0.526	0.489	1	MA1384.1	PHL7
MA1168.1	0.112262	0.260891	0.563	0.496	1	MA1168.1	MYR2
MA1386.1	0.144494	0.352569	0.511	0.491	1	MA1386.1	HHO3
MA0389.1	0.240383	0.560442	0.481	0.502	1	MA0389.1	SRD1
MA1673.1	0.273183	0.313064	0.437	0.494	1	MA1673.1	LBD18
MA1031.1	0.281964	0.264029	0.511	0.483	1	MA1031.1	OJ1581_H09.2
MA1364.1	0.309307	0.533177	0.452	0.499	1	MA1364.1	PIF7
MA1164.1	0.387735	0.483661	0.481	0.471	1	MA1164.1	HHO5
MA1436.1	0.436534	0.310095	0.481	0.506	1	MA1436.1	nuc-1
MA1021.1	0.446038	0.455766	0.496	0.49	1	MA1021.1	PHYPADRAFT_48267
MA0649.1	0.489239	0.52617	0.459	0.508	1	MA0649.1	HEY2
MA1025.1	0.506474	0.414409	0.437	0.489	1	MA1025.1	HBI1
MA0956.1	0.786431	0.350342	0.444	0.498	1	MA0956.1	BEE2
MA0962.1	0.795036	0.501712	0.504	0.511	1	MA0962.1	BHLH34
MA0988.1	0.821294	0.391858	0.481	0.479	1	MA0988.1	PHYPADRAFT_143875
MA0549.1	0.866898	0.300524	0.496	0.497	1	MA0549.1	BZR2
MA1074.1	0.926313	0.950041	0.496	0.494	1	MA1074.1	UNE10

## Sheet: 3 CHB.2
	p_val	avg_log2FC	pct.1	pct.2	p_val_adj	motif	motif.name
MA0153.2	7.92863e-28	1.89414	0.883	0.421	1.30505e-24	MA0153.2	HNF1B
MA0858.1	2.82722e-26	2.037	0.883	0.448	4.65361e-23	MA0858.1	Rarb(var.2)
MA1210.1	1.46141e-24	2.83572	0.833	0.434	2.40547e-21	MA1210.1	HAT22
MA1149.1	4.26597e-23	1.43405	0.842	0.439	7.02178e-20	MA1149.1	RARA::RXRG
MA0046.2	9.96102e-23	1.96248	0.892	0.447	1.63958e-19	MA0046.2	HNF1A
MA1024.1	3.12091e-20	1.94533	0.792	0.433	5.13702e-17	MA1024.1	HAT1
MA1499.1	3.82982e-19	1.75273	0.808	0.459	6.30389e-16	MA1499.1	HOXB4
MA1504.1	3.82982e-19	1.75273	0.808	0.459	6.30389e-16	MA1504.1	HOXC4
MA1406.1	2.23097e-18	1.71036	0.758	0.451	3.67218e-15	MA1406.1	ATHB4
MA0730.1	2.40139e-18	0.883384	0.817	0.46	3.9527e-15	MA0730.1	RARA(var.2)
MA0159.1	4.94995e-17	1.55417	0.767	0.449	8.14762e-14	MA0159.1	RARA::RXRA
MA1639.1	2.17923e-15	0.87598	0.858	0.479	3.58701e-12	MA1639.1	MEIS1(var.2)
MA0954.2	2.3072e-13	1.10711	0.75	0.455	3.79765e-10	MA0954.2	ATHB7
MA1211.1	7.35556e-13	0.750668	0.758	0.467	1.21073e-09	MA1211.1	ATHB18
MA0951.1	4.48977e-12	0.540978	0.808	0.479	7.39016e-09	MA0951.1	ATHB-16
MA0110.3	6.6793e-12	1.01406	0.75	0.45	1.09941e-08	MA0110.3	ATHB-5
MA1198.1	1.41095e-11	0.638476	0.775	0.47	2.32242e-08	MA1198.1	HAT2
MA1496.1	5.08851e-10	1.2459	0.692	0.458	8.37568e-07	MA1496.1	HOXA4
MA0186.1	3.66083e-09	1.59432	0.683	0.454	6.02573e-06	MA0186.1	Dfd
MA0203.1	3.66083e-09	1.59432	0.683	0.454	6.02573e-06	MA0203.1	Scr
MA0215.1	3.66083e-09	1.59432	0.683	0.454	6.02573e-06	MA0215.1	btn
MA0626.1	4.52496e-05	0.587601	0.65	0.487	0.0744808	MA0626.1	Npas2
MA1436.1	0.000124718	0.337283	0.667	0.496	0.205285	MA1436.1	nuc-1
MA0962.1	0.000677122	0.26455	0.65	0.504	1	MA0962.1	BHLH34
MA0895.1	0.000682004	0.527717	0.658	0.477	1	MA0895.1	HMBOX1
MA0070.1	0.00102294	0.391691	0.592	0.487	1	MA0070.1	PBX1
MA1110.1	0.00126321	0.480557	0.592	0.479	1	MA1110.1	NR1H4
MA1535.1	0.00135472	0.503516	0.65	0.511	1	MA1535.1	NR2C1
MA1303.1	0.00182671	0.483862	0.625	0.485	1	MA1303.1	WRKY22
MA0568.1	0.00238573	0.468513	0.625	0.486	1	MA0568.1	MYC3
MA1308.1	0.00281948	0.284125	0.592	0.466	1	MA1308.1	WRKY70
MA1536.1	0.0032277	0.257777	0.642	0.487	1	MA1536.1	NR2C2(var.2)
MA1124.1	0.00329468	0.660245	0.55	0.466	1	MA1124.1	ZNF24
MA1316.1	0.00526049	0.473957	0.583	0.48	1	MA1316.1	WRKY71
MA1576.1	0.00760239	0.386101	0.575	0.479	1	MA1576.1	THRB(var.3)
MA1165.1	0.00798535	0.329219	0.567	0.452	1	MA1165.1	HHO6
MA1306.1	0.0108109	0.449603	0.55	0.471	1	MA1306.1	WRKY11
MA0357.1	0.0115879	0.266346	0.642	0.493	1	MA0357.1	PHO4
MA0074.1	0.0128342	0.346495	0.558	0.47	1	MA0074.1	RXRA::VDR
MA1122.1	0.013875	0.361091	0.583	0.502	1	MA1122.1	TFDP1
MA0959.1	0.0142414	0.633925	0.592	0.462	1	MA0959.1	AIB
MA1302.1	0.0195385	0.279882	0.575	0.479	1	MA1302.1	WRKY65
MA0569.1	0.0217295	0.25986	0.592	0.497	1	MA0569.1	MYC4
MA1089.1	0.0344126	0.481926	0.558	0.483	1	MA1089.1	WRKY57
MA1300.1	0.0360876	0.470735	0.558	0.452	1	MA1300.1	WRKY6
MA1295.1	0.0387996	0.347386	0.533	0.476	1	MA1295.1	WRKY20
MA1317.1	0.0550731	0.273799	0.567	0.472	1	MA1317.1	WRKY50
MA1315.1	0.0587182	0.258048	0.525	0.477	1	MA1315.1	WRKY24
MA1312.1	0.0766378	0.340376	0.542	0.476	1	MA1312.1	WRKY47
MA0419.1	0.0941857	0.495248	0.492	0.451	1	MA0419.1	YAP7
MA1296.1	0.148396	0.302336	0.55	0.471	1	MA1296.1	WRKY46
MA0272.1	0.187178	0.775499	0.4	0.344	1	MA0272.1	ARG81
MA0501.1	0.21027	0.523627	0.383	0.365	1	MA0501.1	MAF::NFE2
MA0391.1	0.223303	0.90837	0.417	0.496	1	MA0391.1	STB4
MA1298.1	0.228655	0.299325	0.575	0.482	1	MA1298.1	WRKY29
MA1324.1	0.252029	0.263235	0.475	0.467	1	MA1324.1	GATA20
MA0585.1	0.302251	0.278107	0.533	0.478	1	MA0585.1	AGL1
MA0089.2	0.356158	1.04956	0.375	0.353	1	MA0089.2	NFE2L1
MA1525.1	0.378752	0.628989	0.5	0.46	1	MA1525.1	NFATC4
MA0319.1	0.438278	0.28896	0.5	0.474	1	MA0319.1	HSF1
MA0625.1	0.525915	0.254662	0.442	0.466	1	MA0625.1	NFATC3
MA0024.3	0.973376	0.851503	0.458	0.489	1	MA0024.3	E2F1
MA0301.1	0.990299	0.401404	0.533	0.489	1	MA0301.1	GAT3

## Sheet: 4 CHB.3
	p_val	avg_log2FC	pct.1	pct.2	p_val_adj	motif	motif.name
MA0858.1	1.36349e-13	1.19929	0.863	0.456	2.24431e-10	MA0858.1	Rarb(var.2)
MA1149.1	3.2315e-12	1.45114	0.787	0.448	5.31905e-09	MA1149.1	RARA::RXRG
MA1639.1	5.18358e-12	1.29063	0.838	0.486	8.53217e-09	MA1639.1	MEIS1(var.2)
MA0730.1	2.23344e-10	1.2104	0.762	0.468	3.67625e-07	MA0730.1	RARA(var.2)
MA0153.2	2.25264e-10	1.15213	0.812	0.432	3.70785e-07	MA0153.2	HNF1B
MA0159.1	5.37857e-09	0.895602	0.787	0.454	8.85313e-06	MA0159.1	RARA::RXRA
MA1499.1	1.10418e-08	0.664076	0.838	0.464	1.81748e-05	MA1499.1	HOXB4
MA1504.1	1.10418e-08	0.664076	0.838	0.464	1.81748e-05	MA1504.1	HOXC4
MA0046.2	2.19818e-08	0.286111	0.812	0.457	3.6182e-05	MA0046.2	HNF1A
MA1210.1	2.5814e-08	1.25232	0.75	0.444	4.24899e-05	MA1210.1	HAT22
MA1130.1	2.87699e-08	13.4317	0.375	0.28	4.73552e-05	MA1130.1	FOSL2::JUN
MA1137.1	3.14411e-08	11.4591	0.4	0.3	5.17521e-05	MA1137.1	FOSL1::JUNB
MA0490.2	5.35431e-08	15.541	0.388	0.293	8.8132e-05	MA0490.2	JUNB
MA1128.1	5.52212e-08	13.3734	0.388	0.285	9.08941e-05	MA1128.1	FOSL1::JUN
MA1135.1	6.95316e-08	8.61901	0.388	0.282	0.000114449	MA1135.1	FOSB::JUNB
MA1144.1	7.18438e-08	11.6509	0.375	0.287	0.000118255	MA1144.1	FOSL2::JUND
MA1406.1	7.29572e-08	0.962411	0.738	0.457	0.000120088	MA1406.1	ATHB4
MA0655.1	8.38431e-08	10.2343	0.412	0.301	0.000138006	MA0655.1	JDP2
MA1138.1	9.50268e-08	10.4492	0.375	0.293	0.000156414	MA1138.1	FOSL2::JUNB
MA1141.1	1.35745e-07	15.0114	0.375	0.278	0.000223437	MA1141.1	FOS::JUND
MA0099.3	1.37379e-07	8.70886	0.375	0.29	0.000226125	MA0099.3	FOS::JUN
MA0477.2	1.61102e-07	14.5956	0.375	0.28	0.000265173	MA0477.2	FOSL1
MA1134.1	1.61212e-07	10.2699	0.388	0.282	0.000265355	MA1134.1	FOS::JUNB
MA0491.2	1.7987e-07	18.7279	0.362	0.285	0.000296067	MA0491.2	JUND
MA1142.1	2.2432e-07	8.63317	0.388	0.3	0.000369231	MA1142.1	FOSL1::JUND
MA0476.1	2.5024e-07	7.57629	0.375	0.276	0.000411895	MA0476.1	FOS
MA0303.1	5.54488e-07	9.00308	0.388	0.283	0.000912687	MA0303.1	GCN4
MA1622.1	6.95891e-07	15.7515	0.375	0.283	0.00114544	MA1622.1	Smad2::Smad3
MA1101.2	7.17303e-07	12.3098	0.362	0.283	0.00118068	MA1101.2	BACH2
MA0478.1	8.32022e-07	14.7744	0.35	0.272	0.00136951	MA0478.1	FOSL2
MA0489.1	1.2793e-06	8.92279	0.362	0.276	0.00210572	MA0489.1	JUN(var.2)
MA1132.1	1.50397e-06	11.6521	0.4	0.289	0.00247553	MA1132.1	JUN::JUNB
MA1024.1	2.7437e-06	0.660643	0.713	0.442	0.00451613	MA1024.1	HAT1
MA0841.1	2.99042e-06	10.6197	0.35	0.29	0.00492223	MA0841.1	NFE2
MA1448.1	7.75516e-06	11.8799	0.375	0.274	0.012765	MA1448.1	fos-1
MA0835.2	8.40721e-06	13.2053	0.388	0.295	0.0138383	MA0835.2	BATF3
MA0462.2	8.88589e-06	14.2771	0.362	0.284	0.0146262	MA0462.2	BATF::JUN
MA1634.1	1.15712e-05	14.83	0.362	0.286	0.0190462	MA1634.1	BATF
MA1335.1	2.60723e-05	0.372398	0.688	0.488	0.042915	MA1335.1	TGA4
MA0110.3	8.28806e-05	0.585615	0.675	0.458	0.136421	MA0110.3	ATHB-5
MA0541.1	0.000407457	0.545546	0.675	0.489	0.670674	MA0541.1	efl-1
MA1342.1	0.000422608	0.412161	0.6	0.471	0.695612	MA1342.1	bZIP50
MA1129.1	0.000684178	0.47035	0.65	0.479	1	MA1129.1	FOSL1::JUN(var.2)
MA1047.2	0.00090056	0.441158	0.625	0.484	1	MA1047.2	TGA5
MA0272.1	0.000975738	4.86843	0.375	0.346	1	MA0272.1	ARG81
MA1438.1	0.00119089	0.292354	0.65	0.49	1	MA1438.1	atf-7
MA0496.3	0.00150304	2.14464	0.388	0.357	1	MA0496.3	MAFK
MA1145.1	0.00180954	0.88016	0.625	0.471	1	MA1145.1	FOSL2::JUND(var.2)
MA1633.1	0.00192786	6.16433	0.362	0.324	1	MA1633.1	BACH1
MA1122.1	0.00236913	0.515984	0.625	0.502	1	MA1122.1	TFDP1
MA0656.1	0.00333051	0.401125	0.637	0.47	1	MA0656.1	JDP2(var.2)
MA0492.1	0.00455381	0.991928	0.575	0.468	1	MA0492.1	JUND(var.2)
MA0018.4	0.00459163	1.64186	0.575	0.469	1	MA0018.4	CREB1
MA0089.2	0.00595336	1.69577	0.412	0.352	1	MA0089.2	NFE2L1
MA0605.2	0.00662555	0.658557	0.537	0.492	1	MA0605.2	ATF3
MA1470.1	0.00729399	0.599686	0.575	0.483	1	MA1470.1	BACH2(var.2)
MA0954.2	0.00776537	0.259413	0.588	0.465	1	MA0954.2	ATHB7
MA1348.1	0.00803671	0.33615	0.588	0.495	1	MA1348.1	TGA9
MA0470.2	0.0084325	1.1657	0.625	0.493	1	MA0470.2	E2F4
MA1336.1	0.0110369	0.335795	0.575	0.483	1	MA1336.1	TGA3
MA1194.1	0.0118601	0.273853	0.325	0.497	1	MA1194.1	AT3G10580
MA1211.1	0.0118806	0.253457	0.6	0.477	1	MA1211.1	ATHB18
MA1632.1	0.0129176	0.922289	0.637	0.482	1	MA1632.1	ATF2
MA0864.2	0.0145507	0.362761	0.6	0.49	1	MA0864.2	E2F2
MA0568.1	0.0146395	0.32432	0.588	0.49	1	MA0568.1	MYC3
MA1133.1	0.0166883	0.308993	0.588	0.481	1	MA1133.1	JUN::JUNB(var.2)
MA0967.1	0.0169888	0.918281	0.6	0.489	1	MA0967.1	BZIP60
MA0501.1	0.0175638	2.82708	0.412	0.364	1	MA0501.1	MAF::NFE2
MA1219.1	0.0221044	0.489213	0.6	0.484	1	MA1219.1	CEJ1
MA0078.1	0.0222834	0.28419	0.613	0.467	1	MA0078.1	Sox17
MA0488.1	0.0237919	0.340949	0.562	0.479	1	MA0488.1	JUN
MA1460.1	0.0258104	0.257424	0.613	0.482	1	MA1460.1	pho
MA1692.1	0.0306929	0.475476	0.525	0.464	1	MA1692.1	ARF29
MA1206.1	0.0366918	0.291053	0.588	0.466	1	MA1206.1	ARF2
MA0469.3	0.0482317	1.11598	0.588	0.482	1	MA0469.3	E2F3
MA0327.1	0.0528629	0.551906	0.525	0.448	1	MA0327.1	HMRA1
MA1110.1	0.0623044	0.266553	0.55	0.483	1	MA1110.1	NR1H4
MA0518.1	0.0712942	0.327749	0.362	0.434	1	MA0518.1	Stat4
MA0001.2	0.0863455	0.489085	0.588	0.475	1	MA0001.2	AGL3
MA0407.1	0.0915777	0.774132	0.525	0.444	1	MA0407.1	THI2
MA0694.1	0.0959863	0.308261	0.575	0.476	1	MA0694.1	ZBTB7B
MA1202.1	0.111854	0.399255	0.5	0.458	1	MA1202.1	AGL55
MA0100.3	0.125637	0.483171	0.55	0.48	1	MA0100.3	MYB
MA0949.1	0.146742	0.273735	0.562	0.469	1	MA0949.1	ARR2
MA0833.2	0.150444	0.615548	0.525	0.47	1	MA0833.2	ATF4
MA1234.1	0.162846	0.614779	0.537	0.5	1	MA1234.1	ERF017
MA1389.1	0.16546	0.442473	0.588	0.485	1	MA1389.1	PHL1
MA1165.1	0.172832	0.630203	0.575	0.454	1	MA1165.1	HHO6
MA0985.1	0.179178	0.537871	0.525	0.466	1	MA0985.1	DRE1C
MA0445.1	0.187843	0.910297	0.512	0.45	1	MA0445.1	D
MA0024.3	0.210352	0.359438	0.512	0.486	1	MA0024.3	E2F1
MA0591.1	0.211208	1.44921	0.4	0.388	1	MA0591.1	Bach1::Mafk
MA0530.1	0.212974	0.653773	0.488	0.465	1	MA0530.1	cnc::maf-S
MA0868.2	0.233841	0.452262	0.537	0.444	1	MA0868.2	SOX8
MA0360.1	0.238488	0.667035	0.388	0.472	1	MA0360.1	RDR1
MA0419.1	0.325043	0.869817	0.45	0.453	1	MA0419.1	YAP7
MA1563.1	0.353159	0.580106	0.475	0.444	1	MA1563.1	SOX18
MA1325.1	0.37123	0.806271	0.537	0.472	1	MA1325.1	GATA14
MA0150.2	0.374837	1.00159	0.412	0.391	1	MA0150.2	Nfe2l2
MA0371.1	0.386118	0.251102	0.475	0.441	1	MA0371.1	ROX1
MA0143.4	0.398844	0.278928	0.438	0.445	1	MA0143.4	SOX2
MA0255.1	0.404497	0.370934	0.5	0.444	1	MA0255.1	z
MA1616.1	0.435012	0.420711	0.4	0.468	1	MA1616.1	Prdm15
MA1042.1	0.450178	0.420094	0.462	0.495	1	MA1042.1	MYB59
MA1456.1	0.452231	0.25718	0.512	0.494	1	MA1456.1	Dref
MA0077.1	0.489516	0.401703	0.462	0.448	1	MA0077.1	SOX9
MA0354.1	0.526105	0.346259	0.5	0.503	1	MA0354.1	PDR8
MA1295.1	0.526866	0.356975	0.462	0.479	1	MA1295.1	WRKY20
MA0948.1	0.552176	0.307019	0.475	0.487	1	MA0948.1	ARR18
MA0431.1	0.581759	0.551808	0.475	0.476	1	MA0431.1	TDA9
MA1394.2	0.673832	0.347382	0.4	0.484	1	MA1394.2	MYB73
MA1152.1	0.683161	0.424814	0.45	0.466	1	MA1152.1	SOX15
MA0282.1	0.720639	0.38817	0.425	0.461	1	MA0282.1	CEP3
MA1120.1	0.758298	0.29948	0.388	0.438	1	MA1120.1	SOX13
MA1409.1	0.785419	0.32321	0.425	0.482	1	MA1409.1	OsRR22
MA1157.1	0.79975	0.42712	0.45	0.47	1	MA1157.1	NUC
MA0319.1	0.823299	0.408885	0.5	0.474	1	MA0319.1	HSF1
MA1378.1	0.849585	0.359181	0.5	0.484	1	MA1378.1	PLT3
MA1304.1	0.88561	0.416834	0.438	0.478	1	MA1304.1	WRKY59
MA0729.1	0.960945	0.540713	0.525	0.497	1	MA0729.1	RARA
MA1261.1	0.964568	0.491055	0.525	0.472	1	MA1261.1	AT5G67000

## Sheet: 5 CHB.4
	p_val	avg_log2FC	pct.1	pct.2	p_val_adj	motif	motif.name
MA0142.1	1.17942e-13	1.54737	0.946	0.456	1.94132e-10	MA0142.1	Pou5f1::Sox2
MA0787.1	2.77932e-07	1.4614	0.865	0.493	0.000457476	MA0787.1	POU3F2
MA1102.2	7.30123e-07	0.793143	0.892	0.51	0.00120178	MA1102.2	CTCFL
MA1211.1	4.3705e-06	0.851018	0.838	0.476	0.00719384	MA1211.1	ATHB18
MA0507.1	2.03261e-05	0.765895	0.784	0.49	0.0334568	MA0507.1	POU2F2
MA0788.1	4.83393e-05	1.02023	0.838	0.494	0.0795665	MA0788.1	POU3F3
MA1115.1	6.44034e-05	0.72683	0.811	0.481	0.106008	MA1115.1	POU5F1
MA0197.2	6.70325e-05	0.762081	0.811	0.496	0.110335	MA0197.2	nub
MA0792.1	8.36947e-05	0.813795	0.865	0.495	0.137762	MA0792.1	POU5F1B
MA0784.1	0.000114241	0.839737	0.784	0.5	0.18804	MA0784.1	POU1F1
MA0789.1	0.000135518	0.76156	0.784	0.49	0.223063	MA0789.1	POU3F4
MA1406.1	0.000149577	0.524788	0.811	0.461	0.246204	MA1406.1	ATHB4
MA0894.1	0.000191054	0.449543	0.784	0.473	0.314474	MA0894.1	HESX1
MA1499.1	0.000198198	0.544606	0.757	0.472	0.326234	MA1499.1	HOXB4
MA1504.1	0.000198198	0.544606	0.757	0.472	0.326234	MA1504.1	HOXC4
MA0110.3	0.000285868	0.290798	0.703	0.461	0.470538	MA0110.3	ATHB-5
MA0644.1	0.000337068	0.356004	0.676	0.479	0.554813	MA0644.1	ESX1
MA0786.1	0.000516169	0.624922	0.757	0.492	0.849614	MA0786.1	POU3F1
MA0381.1	0.000570282	0.810093	0.703	0.467	0.938685	MA0381.1	SKN7
MA0434.1	0.000676451	0.545169	0.73	0.48	1	MA0434.1	YPR013C
MA1024.1	0.000838045	0.290094	0.649	0.448	1	MA1024.1	HAT1
MA0751.1	0.000992872	1.86101	0.811	0.486	1	MA0751.1	ZIC4
MA0627.2	0.00131293	0.477007	0.784	0.481	1	MA0627.2	POU2F3
MA1608.1	0.00141684	0.571765	0.703	0.474	1	MA1608.1	Isl1
MA0858.1	0.0015075	0.384737	0.676	0.467	1	MA0858.1	Rarb(var.2)
MA1584.1	0.0022516	4.06362	0.73	0.481	1	MA1584.1	ZIC5
MA1038.1	0.00306697	1.15876	0.703	0.477	1	MA1038.1	MYB3
MA0696.1	0.00317449	1.25103	0.784	0.486	1	MA0696.1	ZIC1
MA0785.1	0.00324938	0.370518	0.784	0.49	1	MA0785.1	POU2F1
MA1036.1	0.00337332	1.07372	0.649	0.489	1	MA1036.1	MYB111
MA0442.2	0.00598976	0.505694	0.676	0.453	1	MA0442.2	SOX10
MA0456.1	0.00662024	0.577214	0.757	0.478	1	MA0456.1	opa
MA1460.1	0.00741627	0.377225	0.676	0.484	1	MA1460.1	pho
MA0104.4	0.0101155	0.470279	0.757	0.504	1	MA0104.4	MYCN
MA1471.1	0.0113923	0.323725	0.703	0.48	1	MA1471.1	BARX2
MA1039.1	0.0114135	0.894491	0.622	0.498	1	MA1039.1	MYB4
MA0147.3	0.0138902	0.360657	0.595	0.499	1	MA0147.3	MYC
MA0657.1	0.0148571	0.526861	0.73	0.516	1	MA0657.1	KLF13
MA0059.1	0.0157013	0.336779	0.676	0.49	1	MA0059.1	MAX::MYC
MA1066.1	0.0162048	0.655021	0.649	0.487	1	MA1066.1	TCP23
MA1507.1	0.0193291	1.24305	0.649	0.502	1	MA1507.1	HOXD4
MA1289.1	0.0226344	0.306255	0.622	0.484	1	MA1289.1	TCP3
MA1629.1	0.0280562	0.866001	0.622	0.473	1	MA1629.1	Zic2
MA0078.1	0.0291828	0.542676	0.595	0.47	1	MA0078.1	Sox17
MA1208.1	0.03415	0.429384	0.73	0.497	1	MA1208.1	GT-2
MA0193.1	0.0426649	0.495446	0.568	0.481	1	MA0193.1	schlank
MA1020.1	0.042966	0.699338	0.568	0.489	1	MA1020.1	GT-1
MA0769.2	0.047519	0.500837	0.595	0.492	1	MA0769.2	TCF7
MA1496.1	0.0506116	0.420902	0.541	0.469	1	MA1496.1	HOXA4
MA0435.1	0.0515897	0.276684	0.568	0.495	1	MA0435.1	YPR015C
MA0363.1	0.0518373	0.492849	0.622	0.49	1	MA0363.1	REB1
MA1181.1	0.0535954	0.356387	0.649	0.49	1	MA1181.1	MYB113
MA0919.1	0.0680953	0.710009	0.595	0.495	1	MA0919.1	dsc-1
MA0025.2	0.0739261	0.381198	0.297	0.476	1	MA0025.2	NFIL3
MA1040.1	0.0816823	0.370503	0.676	0.493	1	MA1040.1	MYB46
MA0334.1	0.0837089	1.01833	0.595	0.494	1	MA0334.1	MET32
MA0574.1	0.097577	0.735184	0.568	0.489	1	MA0574.1	MYB15
MA1479.1	0.0989524	0.477328	0.595	0.488	1	MA1479.1	DMRTC2
MA1291.1	0.10053	0.752111	0.622	0.491	1	MA1291.1	TCP7
MA1175.1	0.117723	0.559519	0.514	0.488	1	MA1175.1	MYB81
MA1290.1	0.175987	0.309126	0.541	0.499	1	MA1290.1	TCP17
MA0932.1	0.188169	0.347097	0.541	0.492	1	MA0932.1	AHL12
MA0934.1	0.188169	0.347097	0.541	0.492	1	MA0934.1	AHL25
MA0822.1	0.193068	0.464213	0.622	0.511	1	MA0822.1	HES7
MA1057.1	0.202168	0.612667	0.541	0.48	1	MA1057.1	SPL12
MA1442.1	0.273585	0.266161	0.514	0.493	1	MA1442.1	mab-5
MA0126.1	0.362778	0.498747	0.486	0.47	1	MA0126.1	ovo
MA0239.1	0.362778	0.498747	0.486	0.47	1	MA0239.1	prd
MA0438.1	0.372569	0.492292	0.595	0.487	1	MA0438.1	YRM1
MA0724.1	0.400492	0.566686	0.459	0.459	1	MA0724.1	VENTX
MA0333.1	0.495134	0.575391	0.514	0.477	1	MA0333.1	MET31
MA0736.1	0.52052	0.835062	0.432	0.47	1	MA0736.1	GLIS2
MA1702.1	0.539467	1.12348	0.486	0.471	1	MA1702.1	Pdp1
MA1365.2	0.564083	0.252298	0.541	0.496	1	MA1365.2	AT5G47660
MA0494.1	0.618997	0.279617	0.541	0.504	1	MA0494.1	Nr1h3::Rxra
MA0429.1	0.764022	0.290773	0.514	0.496	1	MA0429.1	YLL054C
MA0118.1	0.811914	0.839977	0.405	0.478	1	MA0118.1	Macho-1
MA0777.1	0.828326	0.262765	0.486	0.467	1	MA0777.1	MYBL2
MA0372.1	0.96204	0.471124	0.486	0.482	1	MA0372.1	RPH1
MA0610.1	0.990654	0.656645	0.514	0.483	1	MA0610.1	DMRT3
MA0917.1	0.99632	0.380237	0.351	0.479	1	MA0917.1	gcm2

## Sheet: 6 Ciliated
	p_val	avg_log2FC	pct.1	pct.2	p_val_adj	motif	motif.name
MA1487.1	9.10506e-75	10.4202	0.98	0.415	1.49869e-71	MA1487.1	FOXE1
MA0546.1	1.37021e-73	15.0222	0.98	0.412	2.25536e-70	MA0546.1	pha-4
MA0297.1	1.91547e-71	18.5143	0.98	0.424	3.15286e-68	MA0297.1	FKH2
MA0042.2	1.91547e-71	18.5143	0.98	0.424	3.15286e-68	MA0042.2	FOXI1
MA0848.1	1.91547e-71	18.5143	0.98	0.424	3.15286e-68	MA0848.1	FOXO4
MA0849.1	1.91547e-71	18.5143	0.98	0.424	3.15286e-68	MA0849.1	FOXO6
MA0850.1	1.91547e-71	18.5143	0.98	0.424	3.15286e-68	MA0850.1	FOXP3
MA0446.1	1.43906e-68	11.5774	0.98	0.434	2.36869e-65	MA0446.1	fkh
MA1683.1	1.45752e-67	15.6388	0.98	0.43	2.39908e-64	MA1683.1	FOXA3
MA1446.1	3.20338e-66	12.9544	0.98	0.445	5.27276e-63	MA1446.1	daf-16
MA0481.3	6.04876e-66	12.3713	1	0.439	9.95626e-63	MA0481.3	FOXP1
MA0593.1	1.85624e-65	12.4598	0.98	0.434	3.05536e-62	MA0593.1	FOXP2
MA1103.2	6.14048e-65	15.2811	0.98	0.43	1.01072e-61	MA1103.2	FOXK2
MA0047.3	4.27433e-64	13.9805	1	0.442	7.03555e-61	MA0047.3	FOXA2
MA0852.2	3.32231e-63	12.2045	0.98	0.43	5.46853e-60	MA0852.2	FOXK1
MA0480.1	3.44803e-60	9.09477	0.98	0.433	5.67545e-57	MA0480.1	Foxo1
MA0031.1	1.05609e-59	11.0109	0.98	0.443	1.73833e-56	MA0031.1	FOXD1
MA0157.2	1.05609e-59	11.0109	0.98	0.443	1.73833e-56	MA0157.2	FOXO3
MA1606.1	8.0232e-59	9.91469	0.98	0.449	1.32062e-55	MA1606.1	Foxf1
MA0538.1	8.38129e-55	4.48424	0.959	0.455	1.37956e-51	MA0538.1	daf-12
MA0920.1	5.79423e-54	9.39072	0.98	0.463	9.5373e-51	MA0920.1	fkh-2
MA1489.1	5.79423e-54	9.39072	0.98	0.463	9.5373e-51	MA1489.1	FOXN3
MA1155.1	3.47676e-53	3.49054	0.959	0.449	5.72275e-50	MA1155.1	ZSCAN4
MA1607.1	3.94991e-53	11.0875	0.98	0.455	6.50155e-50	MA1607.1	Foxl2
MA0148.4	6.43837e-53	11.5931	1	0.454	1.05976e-49	MA0148.4	FOXA1
MA0458.1	1.07623e-52	7.09923	0.98	0.451	1.77147e-49	MA0458.1	slp1
MA0847.2	1.80038e-51	9.9421	0.98	0.468	2.96343e-48	MA0847.2	FOXD2
MA0233.1	3.58628e-50	1.82826	0.98	0.447	5.90302e-47	MA0233.1	mirr
MA0073.1	2.02497e-49	5.881	0.918	0.458	3.3331e-46	MA0073.1	RREB1
MA0613.1	6.65738e-49	10.5677	0.98	0.462	1.09581e-45	MA0613.1	FOXG1
MA0030.1	1.36753e-47	7.09497	0.959	0.459	2.25095e-44	MA0030.1	FOXF2
MA0509.2	7.08912e-47	8.27852	0.837	0.415	1.16687e-43	MA0509.2	RFX1
MA0798.2	1.23764e-46	13.8247	0.837	0.404	2.03715e-43	MA0798.2	RFX3
MA0846.1	1.1555e-45	8.7699	0.959	0.47	1.90196e-42	MA0846.1	FOXC2
MA0033.2	7.96696e-45	6.71249	1	0.446	1.31136e-41	MA0033.2	FOXL1
MA0365.1	1.73418e-44	11.3215	0.878	0.425	2.85446e-41	MA0365.1	RFX1
MA0510.2	1.90659e-44	7.49654	0.857	0.394	3.13825e-41	MA0510.2	RFX5
MA0406.1	2.39346e-44	3.23683	0.939	0.387	3.93964e-41	MA0406.1	TEC1
MA0799.1	2.62674e-44	7.19869	0.857	0.403	4.32361e-41	MA0799.1	RFX4
MA1107.2	5.0866e-44	6.39357	0.939	0.467	8.37254e-41	MA1107.2	KLF9
MA0929.1	2.23953e-43	8.51251	0.959	0.481	3.68627e-40	MA0929.1	NCU00019
MA0600.2	2.68129e-43	6.58031	0.857	0.41	4.4134e-40	MA0600.2	RFX2
MA1554.1	4.07393e-43	5.49653	0.918	0.436	6.70569e-40	MA1554.1	RFX7
MA1121.1	6.0352e-41	0.746756	0.918	0.377	9.93393e-38	MA1121.1	TEAD2
MA0851.1	6.11469e-41	6.86769	0.98	0.472	1.00648e-37	MA0851.1	Foxj3
MA0261.1	2.11886e-39	3.55402	0.98	0.45	3.48764e-36	MA0261.1	lin-14
MA0090.3	2.88893e-39	2.72806	0.898	0.378	4.75518e-36	MA0090.3	TEAD1
MA0808.1	2.03882e-38	1.8643	0.898	0.378	3.3559e-35	MA0808.1	TEAD3
MA0296.1	2.54328e-38	5.89505	0.959	0.476	4.18623e-35	MA0296.1	FKH1
MA0162.4	6.70311e-38	4.30473	0.959	0.438	1.10333e-34	MA0162.4	EGR1
MA0571.1	5.57974e-37	4.02621	0.898	0.466	9.18425e-34	MA0571.1	ANT
MA0326.1	2.23413e-36	4.37218	0.918	0.46	3.67738e-33	MA0326.1	MAC1
MA0845.1	7.43656e-36	5.62246	0.939	0.474	1.22406e-32	MA0845.1	FOXB1
MA0006.1	1.40123e-34	4.06806	0.939	0.471	2.30643e-31	MA0006.1	Ahr::Arnt
MA1080.1	1.79047e-33	3.37776	0.959	0.445	2.94712e-30	MA1080.1	WRKY23
MA0041.1	2.64401e-31	3.86907	0.98	0.475	4.35205e-28	MA0041.1	Foxd3
MA0565.2	2.90782e-31	2.86195	0.98	0.453	4.78627e-28	MA0565.2	FUS3
MA0032.2	9.03518e-30	5.33551	0.959	0.477	1.48719e-26	MA0032.2	FOXC1
MA0249.2	2.48417e-28	2.81918	0.918	0.452	4.08894e-25	MA0249.2	twi
MA0632.2	1.11326e-26	1.19994	1	0.514	1.83243e-23	MA0632.2	TCFL5
MA1619.1	2.31062e-26	5.74939	0.939	0.451	3.80327e-23	MA1619.1	Ptf1a(var.2)
MA0317.1	8.80217e-26	6.13656	0.918	0.472	1.44884e-22	MA0317.1	HCM1
MA0614.1	8.80217e-26	6.13656	0.918	0.472	1.44884e-22	MA0614.1	Foxj2
MA0839.1	2.31868e-25	4.55983	0.939	0.472	3.81655e-22	MA0839.1	CREB3L1
MA0698.1	2.39533e-25	4.19884	0.918	0.475	3.94271e-22	MA0698.1	ZBTB18
MA0667.1	4.16268e-25	4.26043	0.918	0.45	6.85177e-22	MA0667.1	MYF6
MA0863.1	4.52152e-25	3.6261	0.898	0.475	7.44242e-22	MA0863.1	MTF1
MA0479.1	6.54814e-25	2.98504	0.898	0.468	1.07782e-21	MA0479.1	FOXH1
MA1349.1	1.41796e-24	3.00073	0.959	0.467	2.33397e-21	MA1349.1	bZIP16
MA1580.1	1.96585e-24	3.9596	0.959	0.465	3.2358e-21	MA1580.1	ZBTB32
MA1351.1	2.13007e-24	2.87557	0.857	0.469	3.5061e-21	MA1351.1	GBF3
MA1647.1	2.1784e-24	3.22376	0.857	0.438	3.58565e-21	MA1647.1	PRDM4
MA0271.1	3.87627e-24	2.45048	0.918	0.442	6.38034e-21	MA0271.1	ARG80
MA1693.1	4.46695e-24	2.8122	0.857	0.46	7.3526e-21	MA1693.1	ARF34
MA1650.1	7.17868e-24	3.25855	0.98	0.513	1.18161e-20	MA1650.1	ZBTB14
MA1044.1	9.02567e-24	2.46681	0.898	0.452	1.48563e-20	MA1044.1	NAC92
MA0665.1	1.08503e-23	3.76638	0.918	0.441	1.78597e-20	MA0665.1	MSC
MA0761.2	2.41225e-23	2.80982	0.857	0.444	3.97056e-20	MA0761.2	ETV1
MA0295.1	5.06041e-23	1.89232	0.939	0.48	8.32943e-20	MA0295.1	FHL1
MA0506.1	9.57224e-23	1.53678	0.98	0.502	1.57559e-19	MA0506.1	NRF1
MA0832.1	1.70473e-22	1.97295	0.939	0.447	2.80598e-19	MA0832.1	Tcf21
MA0968.2	1.77951e-22	2.45799	0.898	0.47	2.92907e-19	MA0968.2	bZIP68
MA1415.1	1.87936e-22	2.41758	0.816	0.445	3.09343e-19	MA1415.1	REF6
MA0557.1	2.06709e-22	3.2041	0.959	0.494	3.40243e-19	MA0557.1	FHY3
MA1529.1	2.51849e-22	3.43867	0.959	0.465	4.14543e-19	MA1529.1	NHLH2
MA1412.1	2.74531e-22	3.13598	0.98	0.514	4.51878e-19	MA1412.1	TSAR2
MA0938.1	5.85036e-22	2.79772	0.837	0.452	9.6297e-19	MA0938.1	NAC058
MA0218.1	6.70405e-22	2.3861	1	0.466	1.10349e-18	MA0218.1	ct
MA0544.1	8.39713e-22	2.26023	0.939	0.453	1.38217e-18	MA0544.1	snpc-4
MA1338.1	2.94686e-21	2.47245	0.918	0.478	4.85054e-18	MA1338.1	AREB3
MA1641.1	3.92291e-21	3.96575	0.939	0.435	6.4571e-18	MA1641.1	MYF5
MA0048.2	6.12469e-21	3.26967	0.939	0.424	1.00812e-17	MA0048.2	NHLH1
MA0062.3	3.05326e-20	3.06998	0.878	0.455	5.02566e-17	MA0062.3	GABPA
MA0375.1	4.31252e-20	1.26044	0.98	0.522	7.0984e-17	MA0375.1	RSC30
MA1472.1	5.33539e-20	3.67952	0.939	0.425	8.78206e-17	MA1472.1	BHLHA15(var.2)
MA1382.1	5.69441e-20	5.85113	1	0.495	9.37299e-17	MA1382.1	FAR1
MA1655.1	6.42884e-20	4.00891	0.878	0.474	1.05819e-16	MA1655.1	ZNF341
MA0744.2	6.97977e-20	0.70334	0.878	0.452	1.14887e-16	MA0744.2	SCRT2
MA1311.2	8.01042e-20	2.10452	0.837	0.474	1.31852e-16	MA1311.2	WRKY28
MA0691.1	8.05773e-20	3.3793	0.939	0.46	1.3263e-16	MA0691.1	TFAP4
MA0405.1	1.06473e-19	2.45448	0.959	0.483	1.75254e-16	MA0405.1	TEA1
MA0500.2	1.50507e-19	2.96076	0.939	0.427	2.47734e-16	MA0500.2	MYOG
MA1337.1	1.74709e-19	3.01983	0.878	0.471	2.87572e-16	MA1337.1	bZIP44
MA1340.1	2.81288e-19	2.44619	0.898	0.471	4.63e-16	MA1340.1	bZIP3
MA0185.1	3.87318e-19	3.23578	0.918	0.478	6.37526e-16	MA0185.1	Deaf1
MA1474.1	4.59979e-19	3.54376	0.939	0.493	7.57126e-16	MA1474.1	CREB3L4
MA0598.3	1.03925e-18	2.7797	0.837	0.458	1.71061e-15	MA0598.3	EHF
MA0930.1	1.09826e-18	2.72537	0.878	0.475	1.80773e-15	MA0930.1	ABF3
MA1370.1	1.35358e-18	2.56712	0.776	0.467	2.22799e-15	MA1370.1	IDD5
MA0040.1	2.3917e-18	4.06287	0.918	0.481	3.93674e-15	MA0040.1	Foxq1
MA0939.1	3.70307e-18	2.78153	0.918	0.474	6.09526e-15	MA0939.1	NAC080
MA1105.2	4.84104e-18	1.6927	0.857	0.455	7.96835e-15	MA1105.2	GRHL2
MA0473.3	5.41182e-18	2.46023	0.837	0.464	8.90786e-15	MA0473.3	ELF1
MA1635.1	5.60776e-18	0.917689	0.918	0.443	9.23037e-15	MA1635.1	BHLHE22(var.2)
MA1668.1	8.67479e-18	2.18981	0.918	0.456	1.42787e-14	MA1668.1	DPBF3
MA0545.1	9.28115e-18	1.41713	0.939	0.436	1.52768e-14	MA0545.1	hlh-1
MA1697.1	9.91269e-18	2.32668	0.837	0.447	1.63163e-14	MA1697.1	ARF4
MA0034.1	1.24544e-17	2.80302	0.857	0.481	2.04999e-14	MA0034.1	Gam1
MA1341.1	2.63345e-17	2.43068	0.939	0.483	4.33465e-14	MA1341.1	bZIP53
MA0255.1	3.19416e-17	2.23269	0.816	0.439	5.25758e-14	MA0255.1	z
MA1411.1	3.21257e-17	2.57639	0.898	0.486	5.28788e-14	MA1411.1	TSAR1
MA1344.1	4.47352e-17	2.36006	0.939	0.481	7.36341e-14	MA1344.1	bZIP28
MA0844.1	5.12832e-17	2.69646	0.939	0.497	8.44122e-14	MA0844.1	XBP1
MA1197.1	5.61569e-17	2.63548	0.939	0.491	9.24343e-14	MA1197.1	CAMTA1
MA0936.1	5.75613e-17	2.2365	0.878	0.469	9.47459e-14	MA0936.1	T11I18.17
MA0013.1	5.75988e-17	2.12477	0.918	0.499	9.48077e-14	MA0013.1	br(var.4)
MA0996.1	7.30229e-17	3.65287	0.816	0.469	1.20196e-13	MA0996.1	ERF043
MA1310.1	7.56278e-17	1.88813	0.837	0.484	1.24483e-13	MA1310.1	WRKY42
MA0969.1	9.21272e-17	2.71652	0.939	0.49	1.51641e-13	MA0969.1	CMTA2
MA0518.1	1.13241e-16	2.98216	0.816	0.423	1.86395e-13	MA0518.1	Stat4
MA0764.2	1.22288e-16	1.98425	0.857	0.451	2.01286e-13	MA0764.2	ETV4
MA1672.1	1.41697e-16	2.30471	0.898	0.473	2.33232e-13	MA1672.1	GBF2
MA0640.2	1.56076e-16	2.25237	0.837	0.454	2.56902e-13	MA0640.2	ELF3
MA0063.2	1.74918e-16	2.27929	0.857	0.453	2.87914e-13	MA0063.2	NKX2-5
MA0343.1	2.75315e-16	1.95517	0.878	0.46	4.53168e-13	MA0343.1	NDT80
MA0126.1	3.06971e-16	2.14586	0.837	0.463	5.05274e-13	MA0126.1	ovo
MA0239.1	3.06971e-16	2.14586	0.837	0.463	5.05274e-13	MA0239.1	prd
MA1457.1	3.32184e-16	1.95818	0.857	0.484	5.46775e-13	MA1457.1	grh
MA1689.1	3.48735e-16	1.88598	0.898	0.457	5.74017e-13	MA1689.1	ARF18
MA1425.1	4.27526e-16	2.5043	0.857	0.483	7.03709e-13	MA1425.1	HYH
MA0210.1	4.84467e-16	1.33238	0.939	0.457	7.97432e-13	MA0210.1	ara
MA0217.1	4.84467e-16	1.33238	0.939	0.457	7.97432e-13	MA0217.1	caup
MA0007.3	6.35851e-16	2.20003	0.816	0.46	1.04661e-12	MA0007.3	Ar
MA0352.1	6.71483e-16	2.12096	0.98	0.496	1.10526e-12	MA0352.1	PDR1
MA1466.1	7.10152e-16	2.32525	0.918	0.49	1.16891e-12	MA1466.1	ATF6
MA0330.1	7.37727e-16	2.1748	0.898	0.483	1.2143e-12	MA0330.1	MBP1::SWI6
MA0472.2	9.1206e-16	0.961946	1	0.419	1.50125e-12	MA0472.2	EGR2
MA0638.1	9.40313e-16	2.44644	0.939	0.487	1.54776e-12	MA0638.1	CREB3
MA1001.2	1.32678e-15	3.11993	0.878	0.49	2.18387e-12	MA1001.2	ERF11
MA0686.1	1.42535e-15	1.88344	0.878	0.477	2.34613e-12	MA0686.1	SPDEF
MA0044.1	1.51444e-15	2.44908	0.857	0.468	2.49277e-12	MA0044.1	HMG-1
MA0311.1	1.64061e-15	2.92402	0.918	0.461	2.70044e-12	MA0311.1	HAL9
MA0776.1	2.69734e-15	2.30868	0.959	0.481	4.43983e-12	MA0776.1	MYBL1
MA1309.1	2.73493e-15	1.82478	0.776	0.467	4.50169e-12	MA1309.1	WRKY3
MA0816.1	4.16561e-15	2.32926	0.918	0.427	6.85659e-12	MA0816.1	Ascl2
MA1170.1	5.69365e-15	2.8179	0.857	0.477	9.37175e-12	MA1170.1	MYB118
MA0986.1	1.19936e-14	2.05624	0.837	0.471	1.97415e-11	MA0986.1	DREB2C
MA1334.1	1.25529e-14	1.99415	0.918	0.485	2.0662e-11	MA1334.1	GBF6
MA0963.1	1.31835e-14	1.96048	0.878	0.465	2.17001e-11	MA0963.1	BHLH78
MA0313.1	1.42114e-14	1.38829	0.857	0.453	2.3392e-11	MA0313.1	HAP2
MA0535.1	1.78511e-14	1.6822	0.918	0.496	2.93829e-11	MA0535.1	Mad
MA1237.1	2.15796e-14	2.3283	0.796	0.47	3.552e-11	MA1237.1	AT4G16750
MA0093.3	2.16286e-14	1.66653	0.857	0.471	3.56007e-11	MA0093.3	USF1
MA1223.1	2.54716e-14	2.76976	0.816	0.456	4.19263e-11	MA1223.1	ERF035
MA0136.2	2.69121e-14	2.27102	0.878	0.49	4.42973e-11	MA0136.2	ELF5
MA1671.1	2.8662e-14	1.92041	0.939	0.49	4.71777e-11	MA1671.1	ERF118
MA1508.1	3.10571e-14	2.18155	0.776	0.454	5.112e-11	MA1508.1	IKZF1
MA1106.1	3.27716e-14	2.39229	0.857	0.485	5.3942e-11	MA1106.1	HIF1A
MA1659.1	3.4365e-14	1.7972	0.878	0.484	5.65649e-11	MA1659.1	ABF4
MA1523.1	3.49187e-14	2.02518	0.816	0.475	5.74762e-11	MA1523.1	MSANTD3
MA0002.2	4.67144e-14	1.36348	0.837	0.449	7.68918e-11	MA0002.2	RUNX1
MA1221.1	4.73093e-14	1.22608	0.918	0.484	7.78712e-11	MA1221.1	RAP26
MA0645.1	4.75159e-14	2.8124	0.857	0.476	7.82111e-11	MA0645.1	ETV6
MA1230.1	4.77275e-14	3.09861	0.816	0.469	7.85595e-11	MA1230.1	ERF037
MA0393.1	5.01639e-14	1.817	0.776	0.457	8.25698e-11	MA0393.1	STE12
MA0581.1	5.94399e-14	1.6323	0.796	0.448	9.78381e-11	MA0581.1	LEC2
MA0454.1	6.43184e-14	2.09278	0.776	0.463	1.05868e-10	MA0454.1	odd
MA1010.1	6.5272e-14	1.99672	0.837	0.472	1.07438e-10	MA1010.1	PHYPADRAFT_64121
MA0762.1	6.59429e-14	2.49746	0.776	0.472	1.08542e-10	MA0762.1	ETV2
MA0992.2	6.70713e-14	2.88197	0.837	0.485	1.10399e-10	MA0992.2	ERF4
MA0937.1	6.98997e-14	2.43827	0.898	0.487	1.15055e-10	MA0937.1	NAC055
MA1544.1	8.10613e-14	2.34285	0.878	0.481	1.33427e-10	MA1544.1	OVOL1
MA0131.2	8.72894e-14	2.26869	0.837	0.498	1.43678e-10	MA0131.2	HINFP
MA0570.2	8.87867e-14	1.67899	0.898	0.485	1.46143e-10	MA0570.2	ABF1
MA0513.1	9.20126e-14	2.03375	0.776	0.45	1.51453e-10	MA0513.1	SMAD2::SMAD3::SMAD4
MA1261.1	9.66323e-14	1.68578	0.857	0.466	1.59057e-10	MA1261.1	AT5G67000
MA0727.1	1.05278e-13	1.41887	0.816	0.456	1.73287e-10	MA0727.1	NR3C2
MA1493.1	1.08694e-13	1.61698	0.857	0.488	1.7891e-10	MA1493.1	HES6
MA1023.1	1.24351e-13	2.48607	0.837	0.475	2.04682e-10	MA1023.1	PHYPADRAFT_28324
MA1240.1	1.46143e-13	1.77062	0.918	0.49	2.40551e-10	MA1240.1	ERF10
MA1545.1	1.46154e-13	2.30025	0.898	0.481	2.40569e-10	MA1545.1	OVOL2
MA1335.1	1.60678e-13	1.80036	0.837	0.488	2.64476e-10	MA1335.1	TGA4
MA0527.1	1.7232e-13	2.57235	0.878	0.481	2.83639e-10	MA0527.1	ZBTB33
MA1160.1	2.01179e-13	1.52973	0.837	0.459	3.3114e-10	MA1160.1	AT1G14580
MA1350.1	2.08116e-13	1.81134	0.857	0.473	3.4256e-10	MA1350.1	bZIP42
MA1266.1	2.09207e-13	1.12695	0.857	0.488	3.44355e-10	MA1266.1	RAP211
MA0942.1	2.44328e-13	2.49721	0.776	0.472	4.02164e-10	MA0942.1	ARF1
MA1090.1	2.62816e-13	1.5413	0.898	0.475	4.32596e-10	MA1090.1	WRKY60
MA0260.1	3.04482e-13	2.64644	0.857	0.442	5.01177e-10	MA0260.1	che-1
MA0360.1	3.3549e-13	1.57644	0.878	0.46	5.52216e-10	MA0360.1	RDR1
MA1363.1	3.53098e-13	1.9226	0.776	0.484	5.81199e-10	MA1363.1	bHLH69
MA0076.2	3.89296e-13	2.34274	0.837	0.478	6.40781e-10	MA0076.2	ELK4
MA1301.1	4.07722e-13	1.60258	0.816	0.456	6.7111e-10	MA1301.1	WRKY33
MA0278.1	4.24294e-13	1.65088	0.816	0.446	6.98388e-10	MA0278.1	BAS1
MA1247.1	4.81867e-13	1.40971	0.918	0.501	7.93153e-10	MA1247.1	ERF087
MA1314.1	4.90988e-13	1.40334	0.857	0.473	8.08166e-10	MA1314.1	WRKY14
MA1086.1	5.22335e-13	1.55242	0.776	0.466	8.59763e-10	MA1086.1	WRKY43
MA1440.1	5.35899e-13	2.01695	0.776	0.457	8.8209e-10	MA1440.1	fkh-9
MA1593.1	5.8112e-13	1.68447	0.878	0.475	9.56523e-10	MA1593.1	ZNF317
MA1455.1	5.86847e-13	1.71597	0.776	0.469	9.65949e-10	MA1455.1	dmrt99B
MA0097.1	7.51949e-13	2.33434	0.918	0.487	1.23771e-09	MA0097.1	bZIP911
MA0113.3	7.56034e-13	1.52824	0.796	0.466	1.24443e-09	MA0113.3	NR3C1
MA0582.1	8.24197e-13	1.60112	0.837	0.463	1.35663e-09	MA0582.1	RAV1
MA0394.1	8.87297e-13	1.71621	0.878	0.498	1.46049e-09	MA0394.1	STP1
MA1435.1	8.89193e-13	2.07054	0.898	0.482	1.46361e-09	MA1435.1	nit-4
MA1241.1	8.95064e-13	2.73222	0.857	0.471	1.47327e-09	MA1241.1	AT4G32800
MA1153.1	9.0435e-13	1.20008	0.878	0.465	1.48856e-09	MA1153.1	Smad4
MA1700.1	1.00954e-12	1.7717	0.796	0.461	1.6617e-09	MA1700.1	Clamp
MA1305.1	1.09316e-12	1.42981	0.776	0.483	1.79934e-09	MA1305.1	WRKY55
MA1366.1	1.20405e-12	2.0578	0.878	0.482	1.98186e-09	MA1366.1	AT1G76880
MA0137.3	1.32024e-12	3.00612	0.653	0.43	2.17312e-09	MA0137.3	STAT1
MA0320.1	1.3454e-12	1.46016	0.878	0.479	2.21453e-09	MA0320.1	IME1
MA0765.2	1.43509e-12	2.42124	0.898	0.499	2.36215e-09	MA0765.2	ETV5
MA1070.1	1.48556e-12	1.31802	0.878	0.49	2.44523e-09	MA1070.1	TGA7
MA1108.2	1.69574e-12	1.66873	0.796	0.46	2.79119e-09	MA1108.2	MXI1
MA1316.1	2.06141e-12	1.45521	0.776	0.479	3.39308e-09	MA1316.1	WRKY71
MA1426.1	2.19468e-12	3.73809	0.837	0.49	3.61244e-09	MA1426.1	MYB124
MA0243.1	2.21251e-12	2.25497	0.796	0.436	3.64178e-09	MA0243.1	sd
MA0532.1	2.25499e-12	1.55886	0.796	0.433	3.71171e-09	MA0532.1	Stat92E
MA0526.3	2.39726e-12	1.4775	0.816	0.471	3.94589e-09	MA0526.3	USF2
MA1345.1	2.40469e-12	1.75168	0.857	0.477	3.95811e-09	MA1345.1	bZIP48
MA1002.1	2.41145e-12	1.96832	0.898	0.487	3.96924e-09	MA1002.1	ERF112
MA1427.1	2.50319e-12	1.51315	0.816	0.466	4.12025e-09	MA1427.1	NAC028
MA1336.1	2.51771e-12	1.41273	0.898	0.477	4.14415e-09	MA1336.1	TGA3
MA1208.1	2.69946e-12	1.83054	0.878	0.493	4.4433e-09	MA1208.1	GT-2
MA1176.1	2.88742e-12	1.54585	0.837	0.475	4.7527e-09	MA1176.1	MYB119
MA1313.1	3.48077e-12	1.55396	0.857	0.474	5.72935e-09	MA1313.1	WRKY7
MA1081.1	3.60783e-12	1.9759	0.796	0.464	5.93849e-09	MA1081.1	WRKY25
MA1099.2	3.68669e-12	2.13162	0.857	0.511	6.06829e-09	MA1099.2	HES1
MA1229.1	3.80725e-12	3.12387	0.776	0.466	6.26673e-09	MA1229.1	AT2G44940
MA0329.1	3.87132e-12	1.5999	0.796	0.493	6.37219e-09	MA0329.1	MBP1
MA0083.3	4.20101e-12	1.79427	0.837	0.489	6.91487e-09	MA0083.3	SRF
MA1367.1	4.26147e-12	1.52524	0.837	0.467	7.01438e-09	MA1367.1	AT1G76870
MA1008.1	4.82143e-12	2.04321	0.776	0.482	7.93607e-09	MA1008.1	PHYPADRAFT_182268
MA0692.1	4.86798e-12	1.42557	0.837	0.496	8.01269e-09	MA0692.1	TFEB
MA1645.1	4.92169e-12	1.38876	0.796	0.448	8.1011e-09	MA1645.1	NKX2-2
MA0976.2	5.46441e-12	1.64048	0.878	0.469	8.99442e-09	MA0976.2	CRF4
MA1297.1	5.97069e-12	1.45587	0.816	0.474	9.82776e-09	MA1297.1	WRKY26
MA1517.1	6.50627e-12	1.42522	0.857	0.498	1.07093e-08	MA1517.1	KLF6
MA0995.2	6.58658e-12	2.49979	0.837	0.482	1.08415e-08	MA0995.2	ERF039
MA0009.2	6.62222e-12	2.06415	0.857	0.465	1.09002e-08	MA0009.2	TBXT
MA1239.1	7.05381e-12	1.31732	0.898	0.487	1.16106e-08	MA1239.1	ERF104
MA1006.1	7.19035e-12	1.33218	0.857	0.481	1.18353e-08	MA1006.1	ERF6
MA1346.1	8.05853e-12	1.41224	0.837	0.488	1.32643e-08	MA1346.1	TGA10
MA1032.1	8.34574e-12	1.73593	0.816	0.469	1.37371e-08	MA1032.1	DREB1G
MA0340.1	1.02231e-11	0.911768	0.918	0.459	1.68272e-08	MA0340.1	MOT3
MA0971.1	1.05849e-11	1.9694	0.776	0.466	1.74227e-08	MA0971.1	DREB1A
MA1228.1	1.28092e-11	1.17822	0.898	0.478	2.10839e-08	MA1228.1	AT4G18450
MA1253.1	1.32276e-11	1.95953	0.776	0.463	2.17726e-08	MA1253.1	AT3G16280
MA1249.1	1.3333e-11	1.92525	0.816	0.493	2.19461e-08	MA1249.1	RAP210
MA0641.1	1.41413e-11	2.60747	0.837	0.492	2.32766e-08	MA0641.1	ELF4
MA0550.2	1.41856e-11	2.30597	0.837	0.484	2.33495e-08	MA0550.2	BZR1
MA1259.1	1.5494e-11	4.33716	0.796	0.467	2.55031e-08	MA1259.1	AT1G01250
MA1244.1	1.64873e-11	1.47985	0.878	0.489	2.71381e-08	MA1244.1	ABR1
MA1318.1	1.68197e-11	1.60876	0.796	0.486	2.76853e-08	MA1318.1	WRKY27
MA0353.1	1.79479e-11	1.25465	0.918	0.462	2.95422e-08	MA0353.1	PDR3
MA1000.2	1.89214e-11	1.58522	0.898	0.48	3.11447e-08	MA1000.2	ERF105
MA1331.1	1.98761e-11	1.36217	0.857	0.477	3.27161e-08	MA1331.1	BEH4
MA1235.1	2.27956e-11	1.85617	0.816	0.473	3.75216e-08	MA1235.1	AIL7
MA1475.1	2.28959e-11	0.980784	0.857	0.49	3.76867e-08	MA1475.1	CREB3L4(var.2)
MA1392.1	2.38022e-11	1.43442	0.857	0.481	3.91785e-08	MA1392.1	MYB98
MA0321.1	2.42522e-11	1.39259	0.755	0.444	3.99191e-08	MA0321.1	INO2
MA0354.1	2.54029e-11	1.44518	0.918	0.494	4.18132e-08	MA0354.1	PDR8
MA1332.1	2.57216e-11	1.32174	0.857	0.483	4.23377e-08	MA1332.1	BEH2
MA0267.1	2.83819e-11	1.0606	0.878	0.466	4.67166e-08	MA0267.1	ACE2
MA1133.1	2.95397e-11	1.3166	0.837	0.478	4.86223e-08	MA1133.1	JUN::JUNB(var.2)
MA0975.1	2.98423e-11	1.55062	0.878	0.495	4.91203e-08	MA0975.1	CRF2
MA1257.1	3.0336e-11	1.19466	0.816	0.477	4.99331e-08	MA1257.1	ERF9
MA1333.1	3.05043e-11	1.76705	0.837	0.5	5.02101e-08	MA1333.1	BEH3
MA1220.1	3.14772e-11	3.07139	0.816	0.469	5.18114e-08	MA1220.1	TINY
MA1264.1	3.86959e-11	0.974458	0.918	0.496	6.36934e-08	MA1264.1	ESE1
MA0647.1	4.08477e-11	1.59722	0.776	0.491	6.72354e-08	MA0647.1	GRHL1
MA0369.1	4.46972e-11	1.93613	0.796	0.481	7.35716e-08	MA0369.1	RLM1
MA1348.1	4.55093e-11	1.06823	0.918	0.49	7.49083e-08	MA1348.1	TGA9
MA1372.1	5.02942e-11	1.56639	0.776	0.47	8.27842e-08	MA1372.1	STZ
MA0588.1	5.12799e-11	5.07902	0.796	0.487	8.44067e-08	MA0588.1	TGA1
MA1007.1	5.2946e-11	2.07758	0.837	0.481	8.71492e-08	MA1007.1	PHYPADRAFT_173530
MA1238.2	5.38178e-11	3.11047	0.755	0.48	8.85841e-08	MA1238.2	ERF38
MA0998.1	5.49671e-11	1.065	0.918	0.492	9.04759e-08	MA0998.1	ERF096
MA0379.1	5.76005e-11	1.27852	0.939	0.515	9.48105e-08	MA0379.1	MOT2
MA0404.1	6.24147e-11	1.27802	0.878	0.483	1.02735e-07	MA0404.1	TBS1
MA1068.1	6.82567e-11	1.91879	0.898	0.502	1.12351e-07	MA1068.1	TGA2
MA1262.1	6.95509e-11	1.09485	0.898	0.482	1.14481e-07	MA1262.1	ERF2
MA0987.1	7.08468e-11	1.40787	0.796	0.486	1.16614e-07	MA0987.1	PHYPADRAFT_140773
MA0616.2	7.09295e-11	1.55701	0.837	0.508	1.1675e-07	MA0616.2	HES2
MA0096.1	7.13655e-11	1.45968	0.878	0.495	1.17468e-07	MA0096.1	bZIP910
MA0428.1	7.49562e-11	1.87017	0.776	0.483	1.23378e-07	MA0428.1	YKL222C
MA1123.2	7.86393e-11	2.53299	0.816	0.454	1.2944e-07	MA1123.2	TWIST1
MA1252.1	8.58311e-11	1.70625	0.918	0.494	1.41278e-07	MA1252.1	PUCHI
MA0310.1	8.66219e-11	1.69994	0.816	0.498	1.4258e-07	MA0310.1	HAC1
MA0981.1	8.80542e-11	1.50636	0.735	0.476	1.44937e-07	MA0981.1	DOF1.8
MA1169.1	9.00507e-11	4.65375	0.898	0.472	1.48223e-07	MA1169.1	MYB105
MA0396.1	9.40996e-11	1.96932	0.776	0.485	1.54888e-07	MA0396.1	STP3
MA1233.2	9.92181e-11	4.25489	0.857	0.483	1.63313e-07	MA1233.2	ERF021
MA0414.1	1.01101e-10	1.78334	0.796	0.48	1.66413e-07	MA0414.1	XBP1
MA1378.1	1.02264e-10	1.78021	0.796	0.478	1.68327e-07	MA1378.1	PLT3
MA1299.1	1.0389e-10	1.50158	0.714	0.46	1.71003e-07	MA1299.1	WRKY17
MA1265.2	1.05537e-10	1.89079	0.755	0.49	1.73713e-07	MA1265.2	ERF015
MA0152.1	1.06924e-10	1.45487	0.776	0.441	1.75998e-07	MA0152.1	NFATC2
MA1236.1	1.08523e-10	1.36671	0.878	0.477	1.78629e-07	MA1236.1	ESE3
MA0980.2	1.08659e-10	1.69153	0.816	0.472	1.78853e-07	MA0980.2	RAP2-10
MA1140.2	1.11953e-10	1.1286	0.776	0.483	1.84274e-07	MA1140.2	JUNB(var.2)
MA1691.1	1.14501e-10	1.68305	0.776	0.46	1.88469e-07	MA1691.1	ARF27
MA0145.3	1.19977e-10	1.67219	0.816	0.489	1.97482e-07	MA0145.3	TFCP2
MA1618.1	1.21595e-10	1.73506	0.857	0.437	2.00145e-07	MA1618.1	Ptf1a
MA0997.1	1.22091e-10	0.712484	0.918	0.495	2.00961e-07	MA0997.1	ERF069
MA0259.1	1.25723e-10	1.52362	0.898	0.494	2.0694e-07	MA0259.1	ARNT::HIF1A
MA0943.1	1.26641e-10	1.561	0.816	0.475	2.0845e-07	MA0943.1	ARF5
MA0420.1	1.32692e-10	1.22187	0.796	0.47	2.18412e-07	MA0420.1	ERT1
MA1603.1	1.35417e-10	1.96973	0.837	0.466	2.22897e-07	MA1603.1	Dmrt1
MA0609.2	1.59551e-10	1.17728	0.918	0.507	2.62621e-07	MA0609.2	CREM
MA1043.1	1.59846e-10	1.27822	0.878	0.467	2.63107e-07	MA1043.1	NAC083
MA1458.1	1.67633e-10	1.3343	0.735	0.45	2.75925e-07	MA1458.1	Hsf
MA1675.1	1.83371e-10	1.50532	0.857	0.467	3.01829e-07	MA1675.1	NAC029
MA0567.1	1.83753e-10	1.26473	0.837	0.5	3.02458e-07	MA0567.1	ERF1B
MA0085.1	1.88135e-10	3.26839	0.653	0.444	3.0967e-07	MA0085.1	Su(H)
MA0327.1	1.9719e-10	1.68348	0.755	0.444	3.24574e-07	MA0327.1	HMRA1
MA1093.1	2.05599e-10	1.86241	0.816	0.474	3.38416e-07	MA1093.1	WRKY75
MA0122.3	2.06433e-10	2.2703	0.816	0.474	3.39789e-07	MA0122.3	Nkx3-2
MA1256.1	2.09957e-10	1.31247	0.857	0.484	3.4559e-07	MA1256.1	RAP212
MA1131.1	2.1341e-10	1.12825	0.857	0.473	3.51273e-07	MA1131.1	FOSL2::JUN(var.2)
MA1342.1	2.58624e-10	1.07902	0.857	0.468	4.25695e-07	MA1342.1	bZIP50
MA1225.1	2.82265e-10	0.634703	0.939	0.489	4.64609e-07	MA1225.1	ERF5
MA0376.1	2.86222e-10	1.20726	0.857	0.478	4.71121e-07	MA0376.1	RTG3
MA0823.1	3.0525e-10	1.44233	0.837	0.499	5.02442e-07	MA0823.1	HEY1
MA1403.1	3.11561e-10	1.40444	0.796	0.46	5.12829e-07	MA1403.1	BPC5
MA0580.1	3.18696e-10	1.30164	0.816	0.481	5.24574e-07	MA0580.1	DYT1
MA1009.1	3.20981e-10	1.47561	0.837	0.464	5.28335e-07	MA1009.1	ARF3
MA0656.1	3.30452e-10	0.912581	0.857	0.468	5.43925e-07	MA0656.1	JDP2(var.2)
MA1483.1	3.33739e-10	2.03882	0.816	0.468	5.49335e-07	MA1483.1	ELF2
MA1179.1	3.47228e-10	1.18729	0.796	0.469	5.71538e-07	MA1179.1	MYB1
MA0819.1	3.80666e-10	2.14371	0.755	0.478	6.26577e-07	MA0819.1	CLOCK
MA1315.1	3.91765e-10	1.15645	0.837	0.472	6.44846e-07	MA1315.1	WRKY24
MA1646.1	4.13029e-10	1.33741	0.735	0.452	6.79845e-07	MA1646.1	OSR2
MA1216.1	4.25413e-10	1.78988	0.755	0.487	7.0023e-07	MA1216.1	RAP21
MA1078.1	4.49684e-10	1.1845	0.776	0.466	7.4018e-07	MA1078.1	WRKY2
MA1376.1	4.73575e-10	3.2014	0.776	0.486	7.79505e-07	MA1376.1	DEAR3
MA0291.1	4.97785e-10	1.58376	0.898	0.473	8.19354e-07	MA0291.1	DAL82
MA1005.2	5.07765e-10	0.413725	0.878	0.499	8.35781e-07	MA1005.2	ERF3
MA0322.1	5.28241e-10	1.38453	0.735	0.455	8.69484e-07	MA0322.1	INO4
MA1171.1	5.55701e-10	1.7919	0.776	0.488	9.14685e-07	MA1171.1	MYB52
MA0993.1	5.56901e-10	1.37551	0.837	0.486	9.16659e-07	MA0993.1	ERF7
MA1049.1	5.71487e-10	0.725566	0.857	0.491	9.40668e-07	MA1049.1	ERF094
MA1231.1	7.17238e-10	0.817254	0.837	0.492	1.18057e-06	MA1231.1	ERF15
MA1339.1	7.86645e-10	1.57941	0.796	0.471	1.29482e-06	MA1339.1	bZIP43
MA1321.1	7.86702e-10	1.98282	0.735	0.493	1.29491e-06	MA1321.1	SPL13
MA0731.1	7.87797e-10	1.05232	0.816	0.457	1.29671e-06	MA0731.1	BCL6B
MA1224.1	8.0825e-10	1.92838	0.776	0.477	1.33038e-06	MA1224.1	CBF1
MA1232.1	8.28292e-10	1.85202	0.857	0.49	1.36337e-06	MA1232.1	AT4G28140
MA1227.2	8.31348e-10	1.86792	0.714	0.472	1.3684e-06	MA1227.2	ERF027
MA1368.2	8.41766e-10	1.78342	0.776	0.479	1.38555e-06	MA1368.2	GT-4
MA1094.1	8.51258e-10	1.41656	0.735	0.491	1.40117e-06	MA1094.1	WRKY8
MA1202.1	8.96159e-10	1.60925	0.735	0.454	1.47508e-06	MA1202.1	AGL55
MA0804.1	9.30723e-10	1.82318	0.796	0.447	1.53197e-06	MA0804.1	TBX19
MA0959.1	9.38408e-10	1.58111	0.755	0.463	1.54462e-06	MA0959.1	AIB
MA0382.1	9.73323e-10	1.37753	0.796	0.476	1.60209e-06	MA0382.1	SKO1
MA0838.1	1.00707e-09	1.53181	0.816	0.453	1.65764e-06	MA0838.1	CEBPG
MA0447.1	1.01265e-09	1.47889	0.857	0.481	1.66682e-06	MA0447.1	gt
MA1377.1	1.03553e-09	1.45781	0.776	0.476	1.70447e-06	MA1377.1	PLT1
MA0607.1	1.0527e-09	0.550205	0.837	0.473	1.73275e-06	MA0607.1	Bhlha15
MA1245.2	1.14152e-09	1.1001	0.857	0.496	1.87894e-06	MA1245.2	AT2G33710
MA0970.1	1.14498e-09	1.61963	0.857	0.498	1.88463e-06	MA0970.1	CMTA3
MA1416.1	1.14981e-09	1.25897	0.796	0.458	1.89259e-06	MA1416.1	RAMOSA1
MA1052.1	1.18175e-09	2.13007	0.878	0.499	1.94517e-06	MA1052.1	RAP2-6
MA0935.1	1.23627e-09	1.332	0.776	0.482	2.0349e-06	MA0935.1	NAC025
MA0605.2	1.23631e-09	1.09938	0.939	0.484	2.03496e-06	MA0605.2	ATF3
MA0349.1	1.2795e-09	2.07765	0.755	0.487	2.10606e-06	MA0349.1	OPI1
MA0695.1	1.28851e-09	1.46054	0.755	0.475	2.12089e-06	MA0695.1	ZBTB7C
MA1022.1	1.31694e-09	1.11223	0.776	0.465	2.16768e-06	MA1022.1	PHYPADRAFT_38837
MA1520.1	1.35001e-09	0.940108	0.735	0.447	2.22212e-06	MA1520.1	MAF
MA0283.1	1.37388e-09	1.65238	0.837	0.496	2.26141e-06	MA0283.1	CHA4
MA1053.1	1.414e-09	1.7071	0.878	0.497	2.32745e-06	MA1053.1	ERF109
MA0684.2	1.56978e-09	2.08908	0.694	0.445	2.58385e-06	MA0684.2	RUNX3
MA0586.2	1.76782e-09	1.59727	0.776	0.478	2.90984e-06	MA0586.2	SPL14
MA1246.1	1.78636e-09	0.513115	0.898	0.484	2.94035e-06	MA1246.1	LEP
MA0332.1	1.78947e-09	1.12649	0.837	0.461	2.94546e-06	MA0332.1	MET28
MA1127.1	1.93202e-09	0.842332	0.837	0.478	3.1801e-06	MA1127.1	FOSB::JUN
MA0463.2	1.94887e-09	1.44599	0.694	0.454	3.20784e-06	MA0463.2	BCL6
MA0084.1	1.97851e-09	1.58366	0.878	0.479	3.25662e-06	MA0084.1	SRY
MA1307.1	2.02771e-09	1.17187	0.776	0.468	3.33761e-06	MA1307.1	WRKY31
MA0098.3	2.07717e-09	1.81098	0.735	0.469	3.41902e-06	MA0098.3	ETS1
MA0840.1	2.10692e-09	0.715799	0.776	0.484	3.468e-06	MA0840.1	Creb5
MA1180.1	2.32665e-09	1.73749	0.735	0.481	3.82966e-06	MA1180.1	MYB3R4
MA0100.3	2.39175e-09	1.11568	0.837	0.475	3.93682e-06	MA0100.3	MYB
MA0020.1	2.44187e-09	1.59539	0.714	0.426	4.01932e-06	MA0020.1	Dof2
MA0421.1	2.53244e-09	1.00289	0.837	0.481	4.1684e-06	MA0421.1	NSI1
MA1371.1	2.56786e-09	1.09509	0.755	0.458	4.22669e-06	MA1371.1	IDD4
MA0579.1	2.62938e-09	0.993759	0.837	0.473	4.32796e-06	MA0579.1	CDC5
MA0999.1	2.63624e-09	0.886396	0.837	0.497	4.33925e-06	MA0999.1	ERF098
MA1303.1	2.64719e-09	1.22834	0.776	0.487	4.35727e-06	MA1303.1	WRKY22
MA0161.2	2.67725e-09	1.67228	0.714	0.431	4.40675e-06	MA0161.2	NFIC
MA1034.1	2.90509e-09	3.87647	0.837	0.509	4.78178e-06	MA1034.1	Os05g0497200
MA0834.1	3.27339e-09	1.25895	0.816	0.485	5.38801e-06	MA0834.1	ATF7
MA1679.1	3.47318e-09	4.23918	0.735	0.479	5.71685e-06	MA1679.1	RAP2-1
MA1143.1	3.51342e-09	0.437532	0.816	0.489	5.78308e-06	MA1143.1	FOSL1::JUND(var.2)
MA0566.1	3.86533e-09	1.18109	0.857	0.492	6.36234e-06	MA0566.1	MYC2
MA0957.1	3.86533e-09	1.18109	0.857	0.492	6.36234e-06	MA0957.1	BHLH3
MA0958.1	3.86533e-09	1.18109	0.857	0.492	6.36234e-06	MA0958.1	BHLH13
MA0368.1	4.07072e-09	1.74126	0.694	0.431	6.7004e-06	MA0368.1	RIM101
MA1308.1	4.16946e-09	1.37971	0.755	0.467	6.86293e-06	MA1308.1	WRKY70
MA0836.2	4.84545e-09	1.46542	0.714	0.452	7.97562e-06	MA0836.2	CEBPD
MA0660.1	5.02608e-09	2.18986	0.633	0.468	8.27292e-06	MA0660.1	MEF2B
MA1217.1	5.19505e-09	1.12747	0.837	0.471	8.55105e-06	MA1217.1	CBF2
MA1025.1	5.33913e-09	1.4065	0.755	0.48	8.78821e-06	MA1025.1	HBI1
MA0602.1	5.72783e-09	0.933597	0.857	0.482	9.42801e-06	MA0602.1	Arid5a
MA1302.1	6.29313e-09	1.33819	0.755	0.478	1.03585e-05	MA1302.1	WRKY65
MA1157.1	6.32537e-09	1.39101	0.714	0.464	1.04116e-05	MA1157.1	NUC
MA0213.1	6.36137e-09	1.01371	0.878	0.502	1.04708e-05	MA0213.1	brk
MA0750.2	6.61454e-09	1.81508	0.776	0.479	1.08875e-05	MA0750.2	ZBTB7A
MA1129.1	6.82176e-09	0.635652	0.857	0.477	1.12286e-05	MA1129.1	FOSL1::JUN(var.2)
MA1592.1	6.9744e-09	1.70098	0.735	0.464	1.14799e-05	MA1592.1	ZNF274
MA1560.1	7.18017e-09	1.4211	0.735	0.487	1.18186e-05	MA1560.1	SOHLH2
MA1362.1	7.29344e-09	1.38648	0.776	0.489	1.2005e-05	MA1362.1	bHLH77
MA0967.1	7.47849e-09	1.00561	0.816	0.486	1.23096e-05	MA0967.1	BZIP60
MA1694.1	7.83022e-09	1.51478	0.816	0.471	1.28885e-05	MA1694.1	ARF35
MA1145.1	7.94668e-09	1.0879	0.796	0.469	1.30802e-05	MA1145.1	FOSL2::JUND(var.2)
MA0620.3	7.97905e-09	1.13	0.816	0.487	1.31335e-05	MA0620.3	MITF
MA1136.1	8.04063e-09	0.969498	0.857	0.478	1.32349e-05	MA1136.1	FOSB::JUNB(var.2)
MA1298.1	8.14541e-09	1.43408	0.776	0.481	1.34073e-05	MA1298.1	WRKY29
MA1047.2	8.66706e-09	0.886752	0.816	0.482	1.4266e-05	MA1047.2	TGA5
MA0012.1	8.93629e-09	1.24486	0.837	0.477	1.47091e-05	MA0012.1	br(var.3)
MA0054.1	9.58215e-09	1.57489	0.755	0.476	1.57722e-05	MA0054.1	myb.Ph3
MA1114.1	9.70931e-09	1.01811	0.837	0.463	1.59815e-05	MA1114.1	PBX3
MA0029.1	9.76366e-09	1.08056	0.837	0.456	1.6071e-05	MA0029.1	Mecom
MA0549.1	9.79412e-09	1.34675	0.796	0.491	1.61211e-05	MA0549.1	BZR2
MA0287.1	9.99448e-09	1.20831	0.714	0.438	1.64509e-05	MA0287.1	CUP2
MA1394.2	1.02133e-08	1.12791	0.816	0.475	1.68111e-05	MA1394.2	MYB73
MA0324.1	1.0277e-08	1.3009	0.776	0.472	1.6916e-05	MA0324.1	LEU3
MA0351.1	1.05734e-08	1.37334	0.714	0.46	1.74038e-05	MA0351.1	DOT6
MA0350.1	1.06819e-08	1.44983	0.714	0.47	1.75824e-05	MA0350.1	TOD6
MA1207.1	1.07177e-08	0.844849	0.816	0.488	1.76413e-05	MA1207.1	GT-A3
MA0519.1	1.1346e-08	1.89686	0.714	0.436	1.86755e-05	MA0519.1	Stat5a::Stat5b
MA0418.1	1.16333e-08	1.74393	0.612	0.47	1.91484e-05	MA0418.1	YAP6
MA1439.1	1.21879e-08	1.05708	0.796	0.461	2.00612e-05	MA1439.1	elt-6
MA0401.1	1.27806e-08	0.995245	0.816	0.462	2.10369e-05	MA0401.1	SWI4
MA0101.1	1.32545e-08	1.52259	0.776	0.462	2.18169e-05	MA0101.1	REL
MA1373.1	1.34149e-08	1.3716	0.694	0.46	2.2081e-05	MA1373.1	IDD2
MA0498.2	1.36796e-08	0.969366	0.776	0.462	2.25166e-05	MA0498.2	MEIS1
MA1532.1	1.37025e-08	1.24041	0.755	0.479	2.25544e-05	MA1532.1	NR1D2
MA1588.1	1.37245e-08	1.12668	0.735	0.478	2.25906e-05	MA1588.1	ZNF136
MA0760.1	1.52411e-08	1.70311	0.776	0.464	2.50868e-05	MA0760.1	ERF
MA1222.1	1.55763e-08	1.17329	0.755	0.468	2.56386e-05	MA1222.1	AT1G44830
MA0828.1	1.55845e-08	0.79108	0.898	0.492	2.5652e-05	MA0828.1	SREBF2(var.2)
MA1251.1	1.57645e-08	2.09028	0.694	0.473	2.59483e-05	MA1251.1	DEAR5
MA0922.1	1.61666e-08	1.93296	0.714	0.465	2.66102e-05	MA0922.1	ces-2
MA1521.1	1.68419e-08	0.430554	0.776	0.428	2.77218e-05	MA1521.1	MAFA
MA0356.1	1.70293e-08	0.779151	0.857	0.495	2.80302e-05	MA0356.1	PHO2
MA1004.1	1.71922e-08	1.13625	0.837	0.498	2.82984e-05	MA1004.1	ERF13
MA1438.1	1.75061e-08	0.833932	0.796	0.49	2.88151e-05	MA1438.1	atf-7
MA1374.1	1.93166e-08	1.18642	0.673	0.458	3.17951e-05	MA1374.1	IDD7
MA0138.2	1.95795e-08	1.50236	0.735	0.467	3.22278e-05	MA0138.2	REST
MA1306.1	2.01848e-08	1.31343	0.735	0.469	3.32243e-05	MA1306.1	WRKY11
MA0004.1	2.04109e-08	1.88988	0.837	0.501	3.35964e-05	MA0004.1	Arnt
MA0770.1	2.05942e-08	0.969385	0.755	0.447	3.3898e-05	MA0770.1	HSF2
MA0402.1	2.10161e-08	1.10869	0.816	0.48	3.45924e-05	MA0402.1	SWI5
MA1704.1	2.12209e-08	1.54326	0.857	0.502	3.49296e-05	MA1704.1	zip-8
MA1178.1	2.15373e-08	1.54607	0.735	0.481	3.54503e-05	MA1178.1	MYB3R1
MA1666.1	2.19937e-08	1.03098	0.755	0.44	3.62016e-05	MA1666.1	HSFB2B
MA1687.1	2.20929e-08	0.969548	0.878	0.483	3.63649e-05	MA1687.1	ARF14
MA1393.2	2.30312e-08	1.16489	0.776	0.483	3.79093e-05	MA1393.2	MYB70
MA0994.1	2.39744e-08	1.21791	0.796	0.496	3.94619e-05	MA0994.1	ERF8
MA0511.2	2.40088e-08	1.22945	0.694	0.462	3.95185e-05	MA0511.2	RUNX2
MA1243.1	2.41439e-08	2.31998	0.796	0.484	3.97408e-05	MA1243.1	DREB19
MA1218.1	2.55996e-08	1.14949	0.776	0.469	4.2137e-05	MA1218.1	CBF4
MA1470.1	2.5836e-08	1.3672	0.776	0.48	4.25261e-05	MA1470.1	BACH2(var.2)
MA1159.1	2.70154e-08	1.47671	0.776	0.463	4.44674e-05	MA1159.1	SGR5
MA1391.2	2.81323e-08	1.24162	0.796	0.497	4.63057e-05	MA1391.2	MYB33
MA0649.1	3.2654e-08	1.18299	0.816	0.499	5.37485e-05	MA0649.1	HEY2
MA0978.1	3.32851e-08	1.08837	0.816	0.482	5.47873e-05	MA0978.1	DREB1E
MA0397.1	3.69248e-08	1.89582	0.796	0.485	6.07782e-05	MA0397.1	STP4
MA0862.1	3.84686e-08	0.975611	0.837	0.482	6.33193e-05	MA0862.1	GMEB2
MA1624.1	3.88643e-08	1.71154	0.694	0.436	6.39707e-05	MA1624.1	Stat5a
MA1174.1	3.97977e-08	1.40057	0.837	0.49	6.55069e-05	MA1174.1	MYB56
MA0985.1	3.98771e-08	1.33604	0.755	0.462	6.56376e-05	MA0985.1	DRE1C
MA0795.1	3.98819e-08	1.13265	0.796	0.466	6.56455e-05	MA0795.1	SMAD3
MA1051.1	4.26825e-08	2.10114	0.878	0.5	7.02554e-05	MA1051.1	RAP2-3
MA1557.1	4.73736e-08	0.971504	0.755	0.466	7.7977e-05	MA1557.1	SMAD5
MA1069.1	4.82401e-08	1.33447	0.796	0.508	7.94031e-05	MA1069.1	TGA6
MA0128.1	5.27182e-08	1.94316	0.755	0.482	8.67742e-05	MA0128.1	EmBP-1
MA0204.1	5.39792e-08	0.867271	0.755	0.466	8.88498e-05	MA0204.1	Six4
MA0246.1	5.39792e-08	0.867271	0.755	0.466	8.88498e-05	MA0246.1	so
MA1511.1	5.40713e-08	1.12938	0.755	0.504	8.90014e-05	MA1511.1	KLF10
MA0334.1	5.75056e-08	1.21956	0.816	0.489	9.46543e-05	MA0334.1	MET32
MA0284.1	5.7982e-08	1.23373	0.816	0.467	9.54384e-05	MA0284.1	CIN5
MA1199.1	6.14029e-08	1.16059	0.735	0.466	0.000101069	MA1199.1	AGL16
MA1484.1	6.629e-08	2.26437	0.694	0.475	0.000109113	MA1484.1	ETS2
MA1021.1	6.73805e-08	1.38572	0.735	0.485	0.000110908	MA1021.1	PHYPADRAFT_48267
MA0464.2	6.7424e-08	1.00243	0.837	0.502	0.00011098	MA0464.2	BHLHE40
MA1156.1	7.12052e-08	1.12549	0.776	0.467	0.000117204	MA1156.1	JKD
MA0543.1	7.324e-08	1.06167	0.796	0.457	0.000120553	MA0543.1	eor-1
MA0488.1	7.48942e-08	0.941081	0.735	0.476	0.000123276	MA0488.1	JUN
MA0129.1	7.83559e-08	1.19177	0.776	0.51	0.000128974	MA0129.1	TGA1A
MA0871.2	8.35884e-08	0.70263	0.816	0.501	0.000137587	MA0871.2	TFEC
MA1424.1	8.67302e-08	1.48406	0.735	0.481	0.000142758	MA1424.1	ERF019
MA0451.1	9.16096e-08	1.34176	0.735	0.454	0.000150789	MA0451.1	kni
MA0988.1	9.19483e-08	1.67842	0.816	0.472	0.000151347	MA0988.1	PHYPADRAFT_143875
MA1669.1	9.2061e-08	0.913003	0.755	0.468	0.000151532	MA1669.1	DREB1B
MA1038.1	9.25746e-08	1.42284	0.694	0.476	0.000152378	MA1038.1	MYB3
MA0475.2	9.32774e-08	1.61342	0.714	0.48	0.000153535	MA0475.2	FLI1
MA1304.1	9.45438e-08	1.05261	0.755	0.471	0.000155619	MA1304.1	WRKY59
MA1322.1	9.54884e-08	1.12668	0.837	0.475	0.000157174	MA1322.1	SPL9
MA0608.1	9.73525e-08	1.19624	0.816	0.498	0.000160242	MA0608.1	Creb3l2
MA0979.1	1.09674e-07	2.24503	0.776	0.507	0.000180524	MA0979.1	ERF008
MA1083.1	1.13787e-07	0.966145	0.755	0.449	0.000187294	MA1083.1	WRKY30
MA0416.1	1.16411e-07	1.08354	0.796	0.487	0.000191613	MA0416.1	YAP3
MA0825.1	1.23912e-07	1.52116	0.776	0.497	0.00020396	MA0825.1	MNT
MA0205.2	1.28457e-07	0.900295	0.776	0.452	0.000211441	MA0205.2	Trl
MA0114.4	1.29956e-07	1.10237	0.673	0.459	0.000213907	MA0114.4	HNF4A
MA0837.1	1.30296e-07	1.35203	0.776	0.447	0.000214467	MA0837.1	CEBPE
MA0415.1	1.30869e-07	1.10266	0.755	0.475	0.00021541	MA0415.1	YAP1
MA0800.1	1.31902e-07	0.365081	0.796	0.448	0.00021711	MA0800.1	EOMES
MA0552.1	1.37455e-07	1.02453	0.837	0.491	0.000226251	MA0552.1	PIF1
MA0636.1	1.38837e-07	0.742394	0.857	0.491	0.000228526	MA0636.1	BHLHE41
MA1104.2	1.4385e-07	0.788067	0.776	0.464	0.000236777	MA1104.2	GATA6
MA1533.1	1.49562e-07	1.06175	0.776	0.48	0.00024618	MA1533.1	NR1I2
MA1275.1	1.50513e-07	1.05557	0.776	0.477	0.000247745	MA1275.1	AT1G47655
MA0466.2	1.54468e-07	1.38201	0.796	0.451	0.000254254	MA0466.2	CEBPB
MA1139.1	1.54815e-07	0.709538	0.776	0.48	0.000254825	MA1139.1	FOSL2::JUNB(var.2)
MA1219.1	1.55391e-07	1.37884	0.755	0.482	0.000255774	MA1219.1	CEJ1
MA0773.1	1.58707e-07	1.95806	0.735	0.482	0.000261232	MA0773.1	MEF2D
MA0520.1	1.65048e-07	1.22097	0.776	0.45	0.000271669	MA0520.1	Stat6
MA1324.1	1.77875e-07	2.25627	0.776	0.461	0.000292782	MA1324.1	GATA20
MA1317.1	1.81599e-07	1.06024	0.755	0.471	0.000298912	MA1317.1	WRKY50
MA0459.1	1.89752e-07	1.02255	0.776	0.463	0.000312331	MA0459.1	tll
MA0639.1	1.93358e-07	0.815701	0.755	0.474	0.000318267	MA0639.1	DBP
MA0584.1	2.09053e-07	0.937301	0.735	0.467	0.000344101	MA0584.1	2022-09-01
MA0018.4	2.11211e-07	0.905938	0.816	0.466	0.000347653	MA0018.4	CREB1
MA1057.1	2.18751e-07	1.1283	0.735	0.476	0.000360064	MA1057.1	SPL12
MA0474.2	2.39674e-07	1.70035	0.694	0.465	0.000394503	MA0474.2	ERG
MA0081.2	2.48296e-07	1.06635	0.714	0.439	0.000408696	MA0081.2	SPIB
MA1260.1	2.51428e-07	1.50065	0.796	0.472	0.000413851	MA1260.1	AT1G77640
MA0777.1	2.53444e-07	0.941457	0.776	0.461	0.000417169	MA0777.1	MYBL2
MA0941.1	2.5474e-07	1.5114	0.755	0.507	0.000419302	MA0941.1	ABF2
MA0965.1	2.61407e-07	0.944837	0.816	0.498	0.000430276	MA0965.1	BIM2
MA1320.1	2.82619e-07	1.38439	0.755	0.486	0.00046519	MA1320.1	SPL15
MA1407.1	2.85033e-07	0.965547	0.816	0.494	0.000469164	MA1407.1	bZIP14
MA0497.1	2.89516e-07	1.55166	0.776	0.495	0.000476543	MA0497.1	MEF2C
MA0140.2	2.96202e-07	1.31028	0.755	0.484	0.000487549	MA0140.2	GATA1::TAL1
MA0359.1	3.03671e-07	1.14711	0.714	0.455	0.000499843	MA0359.1	RAP1
MA1602.1	3.13152e-07	0.989903	0.755	0.47	0.000515448	MA1602.1	ZSCAN29
MA0432.1	3.33872e-07	1.60792	0.796	0.469	0.000549554	MA0432.1	YNR063W
MA1059.2	3.37005e-07	1.26272	0.796	0.499	0.00055471	MA1059.2	SPL5
MA0282.1	3.71552e-07	0.960255	0.714	0.454	0.000611574	MA0282.1	CEP3
MA1089.1	3.80064e-07	0.860582	0.796	0.481	0.000625585	MA1089.1	WRKY57
MA0211.1	3.82675e-07	1.18944	0.714	0.484	0.000629884	MA0211.1	bap
MA0653.1	3.93873e-07	1.41079	0.714	0.454	0.000648315	MA0653.1	IRF9
MA1295.1	3.94665e-07	1.04087	0.735	0.473	0.000649618	MA1295.1	WRKY20
MA1248.1	4.1799e-07	2.08934	0.735	0.476	0.000688012	MA1248.1	DREB26
MA1191.1	4.28619e-07	0.741158	0.837	0.471	0.000705507	MA1191.1	AT3G10113
MA0843.1	4.6399e-07	0.677659	0.755	0.474	0.000763727	MA0843.1	TEF
MA0345.1	4.76907e-07	1.44989	0.898	0.54	0.000784988	MA0345.1	NHP6A
MA1542.1	4.96001e-07	1.3569	0.714	0.47	0.000816417	MA1542.1	OSR1
MA0622.1	5.18337e-07	1.72305	0.735	0.488	0.000853184	MA0622.1	Mlxip
MA0829.2	5.18468e-07	1.12839	0.755	0.485	0.000853398	MA0829.2	SREBF1(var.2)
MA0434.1	5.30206e-07	0.879083	0.776	0.478	0.000872719	MA0434.1	YPR013C
MA1058.1	5.61494e-07	1.16332	0.714	0.491	0.000924219	MA1058.1	SPL4
MA0408.1	5.98155e-07	1.28514	0.735	0.469	0.000984563	MA0408.1	TOS8
MA0484.2	6.3586e-07	1.03764	0.633	0.455	0.00104663	MA0484.2	HNF4G
MA1085.2	6.66573e-07	1.05073	0.735	0.465	0.00109718	MA1085.2	WRKY40
MA0916.1	6.67046e-07	1.47463	0.755	0.489	0.00109796	MA0916.1	Ets21C
MA0038.2	6.79724e-07	0.767685	0.816	0.472	0.00111883	MA0038.2	GFI1
MA1513.1	6.99836e-07	0.609304	0.878	0.514	0.00115193	MA1513.1	KLF15
MA0966.1	7.28536e-07	0.909877	0.776	0.484	0.00119917	MA0966.1	BIM3
MA1048.1	7.4811e-07	0.687019	0.776	0.493	0.00123139	MA1048.1	ERF018
MA1255.1	7.63636e-07	0.976593	0.776	0.463	0.00125694	MA1255.1	AT1G22810
MA1300.1	7.80543e-07	1.10368	0.755	0.451	0.00128477	MA1300.1	WRKY6
MA0983.1	7.8134e-07	0.75567	0.796	0.461	0.00128609	MA0983.1	DOF5.6
MA0973.1	7.85604e-07	0.706075	0.816	0.454	0.0012931	MA0973.1	CDF2
MA0281.1	8.42112e-07	0.676768	0.837	0.5	0.00138612	MA0281.1	CBF1
MA0318.1	8.97867e-07	0.660462	0.735	0.484	0.00147789	MA0318.1	HMRA2
MA0748.2	8.99071e-07	3.91171	0.796	0.5	0.00147987	MA0748.2	YY2
MA1250.1	9.02478e-07	1.05448	0.735	0.482	0.00148548	MA1250.1	AT1G75490
MA0931.1	9.19629e-07	1.08691	0.816	0.491	0.00151371	MA0931.1	ABI5
MA1242.1	9.19753e-07	2.01891	0.755	0.479	0.00151391	MA1242.1	AT3G57600
MA1462.1	9.22055e-07	0.776668	0.837	0.471	0.0015177	MA1462.1	vfl
MA1173.1	9.31283e-07	1.1195	0.755	0.481	0.00153289	MA1173.1	MYB101
MA0242.1	9.38579e-07	1.32181	0.694	0.476	0.0015449	MA0242.1	Bgb::run
MA0028.2	9.74166e-07	1.4003	0.796	0.493	0.00160348	MA0028.2	ELK1
MA0392.1	1.00899e-06	1.22809	0.796	0.479	0.0016608	MA0392.1	STB5
MA1395.1	1.0247e-06	1.03621	0.755	0.471	0.00168665	MA1395.1	MYB77
MA1181.1	1.15528e-06	1.52008	0.755	0.487	0.00190159	MA1181.1	MYB113
MA0053.1	1.23132e-06	0.716016	0.694	0.445	0.00202676	MA0053.1	MNB1A
MA0064.1	1.23132e-06	0.716016	0.694	0.445	0.00202676	MA0064.1	PBF
MA1419.1	1.27266e-06	1.16353	0.755	0.454	0.0020948	MA1419.1	IRF4
MA0577.2	1.27976e-06	1.15065	0.735	0.488	0.00210649	MA0577.2	SPL3
MA1464.1	1.28239e-06	0.288292	0.837	0.513	0.00211081	MA1464.1	ARNT2
MA0766.2	1.35318e-06	0.821475	0.714	0.451	0.00222733	MA0766.2	GATA5
MA1670.1	1.39931e-06	0.964681	0.735	0.473	0.00230326	MA1670.1	DREB1C
MA1702.1	1.4383e-06	0.808509	0.714	0.466	0.00236744	MA1702.1	Pdp1
MA0875.1	1.44203e-06	0.762401	0.816	0.47	0.00237358	MA0875.1	BARX1
MA0052.4	1.46554e-06	1.13439	0.755	0.496	0.00241228	MA0052.4	MEF2A
MA1359.1	1.46813e-06	1.02402	0.857	0.494	0.00241655	MA1359.1	bHLH31
MA1579.1	1.4757e-06	1.14868	0.653	0.445	0.002429	MA1579.1	ZBTB26
MA1258.1	1.57789e-06	1.38496	0.735	0.481	0.0025972	MA1258.1	DREB2
MA0564.1	1.5862e-06	1.03493	0.714	0.454	0.00261088	MA0564.1	ABI3
MA0794.1	1.62413e-06	1.03911	0.735	0.481	0.00267332	MA0794.1	PROX1
MA1625.1	1.63001e-06	1.2287	0.612	0.442	0.002683	MA1625.1	Stat5b
MA0663.1	1.67047e-06	0.953785	0.776	0.499	0.00274959	MA0663.1	MLX
MA0067.1	1.69044e-06	0.604216	0.837	0.467	0.00278247	MA0067.1	Pax2
MA1703.1	1.72969e-06	0.705236	0.714	0.468	0.00284706	MA1703.1	pqm-1
MA0361.1	1.78006e-06	0.787531	0.796	0.492	0.00292997	MA0361.1	RDS1
MA1525.1	1.78872e-06	0.661597	0.694	0.457	0.00294423	MA1525.1	NFATC4
MA0395.1	1.97195e-06	0.75857	0.837	0.498	0.00324584	MA0395.1	STP2
MA1124.1	2.10429e-06	0.949685	0.735	0.464	0.00346365	MA1124.1	ZNF24
MA1182.1	2.10599e-06	0.731565	0.816	0.475	0.00346646	MA1182.1	At3g09600
MA0533.1	2.11656e-06	1.09756	0.714	0.469	0.00348387	MA0533.1	su(Hw)
MA1077.1	2.13416e-06	0.980038	0.735	0.487	0.00351283	MA1077.1	WRKY18
MA0759.1	2.14085e-06	1.44929	0.714	0.487	0.00352383	MA0759.1	ELK3
MA0558.1	2.24737e-06	0.936458	0.735	0.474	0.00369917	MA0558.1	FLC
MA1172.1	2.29516e-06	1.1432	0.714	0.483	0.00377784	MA1172.1	MYB3R5
MA1056.1	2.30236e-06	0.896909	0.755	0.478	0.00378968	MA1056.1	SPL11
MA1294.1	2.30297e-06	1.26371	0.653	0.475	0.00379068	MA1294.1	MYB62
MA0286.1	2.43243e-06	1.00565	0.776	0.506	0.00400378	MA0286.1	CST6
MA0578.1	2.48292e-06	1.06476	0.755	0.488	0.00408688	MA0578.1	SPL8
MA1343.1	2.5315e-06	0.286477	0.816	0.462	0.00416684	MA1343.1	bZIP52
MA0589.1	2.5948e-06	0.997366	0.714	0.473	0.00427105	MA0589.1	ZAP1
MA0574.1	2.81863e-06	0.900782	0.796	0.484	0.00463947	MA0574.1	MYB15
MA0626.1	2.83656e-06	1.10636	0.755	0.49	0.00466898	MA0626.1	Npas2
MA1206.1	2.83896e-06	0.893489	0.653	0.466	0.00467292	MA1206.1	ARF2
MA1509.1	2.8554e-06	1.14824	0.633	0.482	0.00469999	MA1509.1	IRF6
MA0173.1	2.91037e-06	0.850685	0.796	0.473	0.00479047	MA0173.1	CG11617
MA0299.1	3.06725e-06	0.884104	0.796	0.475	0.0050487	MA0299.1	GAL4
MA0944.1	3.22908e-06	1.10942	0.735	0.474	0.00531507	MA0944.1	ARF8
MA0774.1	3.37883e-06	0.662622	0.653	0.467	0.00556156	MA0774.1	MEIS2
MA1088.1	3.41307e-06	0.777783	0.776	0.479	0.00561791	MA1088.1	WRKY48
MA0569.1	3.41867e-06	1.06478	0.837	0.495	0.00562713	MA0569.1	MYC4
MA0400.1	3.44398e-06	1.49953	0.776	0.469	0.00566879	MA0400.1	SUT2
MA0771.1	3.68993e-06	0.597817	0.694	0.447	0.00607362	MA0771.1	HSF4
MA1401.1	3.90383e-06	0.677577	0.816	0.473	0.0064257	MA1401.1	EPR1
MA0391.1	4.03633e-06	0.818385	0.735	0.487	0.00664379	MA0391.1	STB4
MA1184.1	4.34329e-06	0.573563	0.755	0.472	0.00714905	MA1184.1	RVE1
MA0594.2	4.40949e-06	0.773471	0.735	0.454	0.00725803	MA0594.2	HOXA9
MA1402.1	4.52769e-06	0.862003	0.714	0.459	0.00745258	MA1402.1	BPC6
MA1185.1	4.57106e-06	0.765947	0.776	0.471	0.00752396	MA1185.1	LHY1
MA0604.1	4.59363e-06	1.18602	0.755	0.515	0.00756111	MA0604.1	Atf1
MA0763.1	4.62247e-06	1.62408	0.735	0.477	0.00760859	MA0763.1	ETV3
MA0831.2	4.68086e-06	0.712776	0.816	0.49	0.0077047	MA0831.2	TFE3
MA0314.1	4.73063e-06	0.698041	0.816	0.534	0.00778661	MA0314.1	HAP3
MA0275.1	5.28251e-06	1.41988	0.694	0.475	0.00869502	MA0275.1	ASG1
MA0280.1	5.28251e-06	1.41988	0.694	0.475	0.00869502	MA0280.1	CAT8
MA0045.1	5.34474e-06	0.885169	0.735	0.465	0.00879744	MA0045.1	HMG-I/Y
MA0270.1	5.48199e-06	0.981382	0.694	0.476	0.00902336	MA0270.1	AFT2
MA0001.2	5.48975e-06	0.796935	0.673	0.475	0.00903612	MA0001.2	AGL3
MA1417.1	5.4907e-06	0.965716	0.796	0.471	0.00903769	MA1417.1	O2
MA1354.1	5.56425e-06	1.07149	0.714	0.468	0.00915875	MA1354.1	AT4G12670
MA0121.1	5.77663e-06	0.692985	0.735	0.474	0.00950833	MA0121.1	ARR10
MA0108.2	5.9202e-06	1.46796	0.673	0.474	0.00974465	MA0108.2	TBP
MA1698.1	6.09288e-06	0.842882	0.714	0.472	0.0100289	MA1698.1	ARF7
MA0989.1	6.17686e-06	0.792137	0.735	0.462	0.0101671	MA0989.1	PHYPADRAFT_153324
MA1037.1	6.46207e-06	1.15667	0.735	0.485	0.0106366	MA1037.1	MYB24
MA0123.1	6.51692e-06	0.920662	0.776	0.493	0.0107268	MA0123.1	abi4
MA1676.1	6.87604e-06	1.65559	0.694	0.486	0.011318	MA1676.1	NAC062
MA1380.1	6.97664e-06	1.131	0.776	0.524	0.0114836	MA1380.1	AT2G20110
MA1585.1	7.00978e-06	0.754014	0.755	0.484	0.0115381	MA1585.1	ZKSCAN1
MA0265.1	7.13521e-06	1.20022	0.735	0.487	0.0117446	MA0265.1	ABF1
MA0107.1	7.20063e-06	1.13576	0.673	0.468	0.0118522	MA0107.1	RELA
MA0438.1	7.59438e-06	1.01755	0.714	0.484	0.0125003	MA0438.1	YRM1
MA0409.1	7.97112e-06	0.519701	0.776	0.49	0.0131205	MA0409.1	TYE7
MA0615.1	8.17956e-06	0.641084	0.837	0.491	0.0134636	MA0615.1	Gmeb1
MA1361.1	8.18893e-06	0.752513	0.776	0.49	0.013479	MA1361.1	bHLH18
MA0493.1	8.26025e-06	0.376111	0.796	0.51	0.0135964	MA0493.1	Klf1
MA0664.1	8.29837e-06	0.675297	0.776	0.489	0.0136591	MA0664.1	MLXIPL
MA1011.1	8.42424e-06	0.423581	0.755	0.492	0.0138663	MA1011.1	PHYPADRAFT_72483
MA0290.1	8.97317e-06	0.788777	0.694	0.469	0.0147698	MA0290.1	DAL81
MA1512.1	9.13565e-06	0.356198	0.776	0.49	0.0150373	MA1512.1	KLF11
MA1036.1	9.70731e-06	1.29342	0.694	0.487	0.0159782	MA1036.1	MYB111
MA0548.2	9.7872e-06	0.835104	0.694	0.469	0.0161097	MA0548.2	AGL15
MA1074.1	1.03253e-05	1.17433	0.694	0.49	0.0169954	MA1074.1	UNE10
MA0926.1	1.04968e-05	0.92302	0.735	0.486	0.0172778	MA0926.1	unc-86
MA0619.1	1.08338e-05	0.452579	0.837	0.475	0.0178324	MA0619.1	LIN54
MA1387.1	1.11475e-05	1.17739	0.714	0.489	0.0183488	MA1387.1	AT1G13300
MA1573.1	1.17074e-05	0.562179	0.735	0.48	0.0192704	MA1573.1	THAP11
MA0262.1	1.17905e-05	0.953601	0.633	0.466	0.0194072	MA0262.1	mab-3
MA1323.1	1.17925e-05	1.29224	0.653	0.475	0.0194104	MA1323.1	GATA19
MA0021.1	1.21843e-05	0.75448	0.612	0.427	0.0200553	MA0021.1	Dof3
MA1269.1	1.29041e-05	0.813125	0.612	0.451	0.0212401	MA1269.1	dof4.5
MA1033.1	1.36648e-05	0.970236	0.796	0.497	0.0224922	MA1033.1	OJ1058_F05.8
MA1188.1	1.41863e-05	0.667657	0.673	0.472	0.0233507	MA1188.1	At3g11280
MA1664.1	1.44334e-05	0.699896	0.653	0.454	0.0237573	MA1664.1	HSFA6B
MA0156.2	1.49348e-05	1.28071	0.735	0.488	0.0245827	MA0156.2	FEV
MA0273.1	1.52263e-05	1.31812	0.633	0.477	0.0250626	MA0273.1	ARO80
MA0144.2	1.52698e-05	1.24816	0.735	0.433	0.025134	MA0144.2	STAT3
MA1175.1	1.59109e-05	0.912329	0.735	0.484	0.0261893	MA1175.1	MYB81
MA1680.1	1.66362e-05	0.764007	0.714	0.483	0.0273831	MA1680.1	RVE7
MA0015.1	1.68154e-05	1.01849	0.796	0.536	0.0276782	MA0015.1	Cf2
MA1356.1	1.68329e-05	0.747159	0.755	0.484	0.027707	MA1356.1	TRP2
MA1055.1	1.71442e-05	1.00965	0.694	0.488	0.0282194	MA1055.1	SPL1
MA0869.1	1.79199e-05	1.00802	0.714	0.478	0.0294961	MA0869.1	Sox11
MA1420.1	1.80653e-05	0.518054	0.694	0.471	0.0297355	MA1420.1	IRF5
MA1444.1	1.92777e-05	0.764912	0.714	0.484	0.0317311	MA1444.1	cebp-1
MA0540.1	1.92814e-05	1.52479	0.673	0.456	0.0317372	MA0540.1	dpy-27
MA0553.1	1.97941e-05	0.823742	0.673	0.474	0.0325812	MA0553.1	SMZ
MA0492.1	1.98581e-05	0.483972	0.796	0.465	0.0326864	MA0492.1	JUND(var.2)
MA0486.2	2.14521e-05	0.734981	0.694	0.439	0.0353102	MA0486.2	HSF1
MA1296.1	2.20098e-05	0.975886	0.735	0.469	0.0362282	MA1296.1	WRKY46
MA1271.1	2.25688e-05	0.665094	0.755	0.471	0.0371482	MA1271.1	DAG2
MA1667.1	2.26455e-05	0.727763	0.612	0.438	0.0372744	MA1667.1	HSFC1
MA1616.1	2.31728e-05	0.79564	0.694	0.461	0.0381424	MA1616.1	Prdm15
MA0960.1	2.3798e-05	0.41078	0.776	0.507	0.0391716	MA0960.1	BHLH104
MA0385.1	2.38919e-05	0.747257	0.694	0.46	0.0393261	MA0385.1	SOK2
MA0693.2	2.49525e-05	1.06897	0.673	0.505	0.0410718	MA0693.2	VDR
MA1364.1	2.5339e-05	0.839738	0.755	0.491	0.0417079	MA1364.1	PIF7
MA1674.1	2.70058e-05	0.810514	0.653	0.479	0.0444516	MA1674.1	NAC017
MA0325.1	2.76426e-05	0.662841	0.714	0.476	0.0454998	MA0325.1	LYS14
MA1166.1	3.03345e-05	1.13738	0.776	0.478	0.0499307	MA1166.1	PHL12
MA1203.1	3.0418e-05	0.682651	0.694	0.457	0.0500681	MA1203.1	AGL63
MA0010.1	3.14681e-05	0.754075	0.755	0.485	0.0517965	MA0010.1	br
MA0112.3	3.17057e-05	0.501717	0.755	0.482	0.0521876	MA0112.3	ESR1
MA0595.1	3.27739e-05	0.807401	0.776	0.476	0.0539459	MA0595.1	SREBF1
MA1263.1	3.32073e-05	1.31765	0.673	0.492	0.0546593	MA1263.1	AT1G36060
MA1276.1	3.35194e-05	0.685882	0.694	0.465	0.0551729	MA1276.1	AT3G52440
MA0982.1	3.49036e-05	0.507797	0.694	0.471	0.0574514	MA0982.1	DOF2.4
MA0439.1	3.49138e-05	1.15004	0.714	0.489	0.0574681	MA0439.1	YRR1
MA1060.1	3.6107e-05	1.14534	0.714	0.492	0.0594322	MA1060.1	SPL7
MA0080.5	3.70644e-05	0.686601	0.592	0.439	0.0610081	MA0080.5	SPI1
MA1126.1	3.72232e-05	0.462333	0.796	0.493	0.0612694	MA1126.1	FOS::JUN(var.2)
MA0109.1	3.94594e-05	0.9655	0.755	0.511	0.0649502	MA0109.1	HLTF
MA0059.1	3.9894e-05	0.865504	0.735	0.488	0.0656654	MA0059.1	MAX::MYC
MA0237.2	3.99365e-05	0.794931	0.714	0.461	0.0657355	MA0237.2	pan
MA0907.1	4.05732e-05	2.54209	0.755	0.442	0.0667835	MA0907.1	HOXC13
MA0292.1	4.20813e-05	1.03151	0.714	0.49	0.0692659	MA0292.1	ECM22
MA0380.1	4.20813e-05	1.03151	0.714	0.49	0.0692659	MA0380.1	SIP4
MA1677.1	4.36353e-05	1.08257	0.633	0.474	0.0718237	MA1677.1	NAC078
MA1079.1	4.38592e-05	0.549788	0.714	0.469	0.0721922	MA1079.1	WRKY21
MA0357.1	4.53548e-05	0.956841	0.735	0.496	0.074654	MA0357.1	PHO4
MA0386.1	4.64829e-05	0.809959	0.816	0.528	0.0765108	MA0386.1	SPT15
MA0568.1	4.84369e-05	1.26033	0.796	0.487	0.0797271	MA0568.1	MYC3
MA0043.3	5.3248e-05	0.731456	0.694	0.47	0.0876462	MA0043.3	HLF
MA0821.1	5.64467e-05	0.552256	0.796	0.488	0.0929113	MA0821.1	HES5
MA1158.1	5.6624e-05	0.839996	0.612	0.474	0.0932032	MA1158.1	MGP
MA1449.1	5.72271e-05	0.715237	0.776	0.492	0.0941958	MA1449.1	hlh-30
MA0305.1	5.87105e-05	0.96113	0.653	0.451	0.0966375	MA0305.1	GCR2
MA1045.1	5.99685e-05	0.986281	0.755	0.48	0.0987082	MA1045.1	NAC043
MA0803.1	6.04327e-05	0.650812	0.776	0.466	0.0994723	MA0803.1	TBX15
MA1662.1	6.14697e-05	0.781143	0.714	0.473	0.101179	MA1662.1	AT3G10030
MA0676.1	6.57372e-05	0.918207	0.735	0.478	0.108203	MA0676.1	Nr2e1
MA0437.1	7.13471e-05	0.617019	0.735	0.488	0.117437	MA0437.1	YPR196W
MA0637.1	7.16402e-05	0.784043	0.735	0.475	0.11792	MA0637.1	CENPB
MA0972.1	7.24892e-05	2.39668	0.592	0.467	0.119317	MA0972.1	CCA1
MA0610.1	7.65071e-05	0.607784	0.735	0.478	0.125931	MA0610.1	DMRT3
MA0147.3	8.03475e-05	0.985597	0.755	0.496	0.132252	MA0147.3	MYC
MA1161.1	8.23136e-05	0.764704	0.735	0.51	0.135488	MA1161.1	TSO1
MA0494.1	8.34458e-05	0.747957	0.694	0.501	0.137352	MA0494.1	Nr1h3::Rxra
MA0767.1	8.65387e-05	0.848058	0.673	0.48	0.142443	MA0767.1	GCM2
MA1234.1	8.80693e-05	0.711474	0.735	0.496	0.144962	MA1234.1	ERF017
MA0606.1	8.92861e-05	0.632736	0.694	0.456	0.146965	MA0606.1	NFAT5
MA1503.1	8.95858e-05	6.9619	0.694	0.413	0.147458	MA1503.1	HOXB9
MA0222.1	9.77796e-05	0.56172	0.755	0.478	0.160945	MA0222.1	exd
MA0670.1	0.000100783	0.768383	0.612	0.449	0.165888	MA0670.1	NFIA
MA0288.1	0.000106746	0.52984	0.673	0.453	0.175704	MA0288.1	CUP9
MA0575.1	0.000107085	0.713845	0.776	0.493	0.176262	MA0575.1	F3A4.140
MA1688.1	0.000109326	1.05579	0.673	0.463	0.179951	MA1688.1	ARF16
MA1183.1	0.000109567	0.548994	0.673	0.466	0.180348	MA1183.1	RVE6
MA0082.1	0.000110534	1.07927	0.673	0.464	0.181939	MA0082.1	squamosa
MA0419.1	0.000111018	0.566006	0.694	0.448	0.182735	MA0419.1	YAP7
MA0962.1	0.000114093	0.867917	0.714	0.507	0.187797	MA0962.1	BHLH34
MA0739.1	0.000115158	0.497355	0.735	0.454	0.189549	MA0739.1	Hic1
MA0556.1	0.00013343	0.607857	0.714	0.445	0.219626	MA0556.1	AP3
MA0627.2	0.00013453	0.702323	0.735	0.48	0.221436	MA0627.2	POU2F3
MA0102.4	0.000139667	1.28692	0.633	0.478	0.229892	MA0102.4	CEBPA
MA0772.1	0.00014841	1.39494	0.612	0.47	0.244282	MA0772.1	IRF7
MA1187.1	0.000155077	0.484459	0.653	0.468	0.255256	MA1187.1	LCL1
MA0956.1	0.000157541	0.799126	0.694	0.491	0.259312	MA0956.1	BEE2
MA1660.1	0.000162236	1.26876	0.653	0.484	0.267041	MA1660.1	ANAC13
MA1196.1	0.000164285	0.701577	0.714	0.475	0.270412	MA1196.1	At5g05790
MA1091.1	0.000173928	0.823775	0.735	0.473	0.286285	MA1091.1	WRKY62
MA0547.1	0.000187572	0.565301	0.653	0.459	0.308744	MA0547.1	skn-1
MA0562.1	0.000203127	0.866657	0.796	0.495	0.334347	MA0562.1	PIF5
MA0411.1	0.000204358	1.0568	0.673	0.479	0.336373	MA0411.1	UPC2
MA0749.1	0.00020464	0.641555	0.714	0.482	0.336838	MA0749.1	ZBED1
MA0333.1	0.000206254	0.631028	0.653	0.474	0.339495	MA0333.1	MET31
MA1092.1	0.000210127	0.6474	0.735	0.474	0.345869	MA1092.1	WRKY63
MA1405.1	0.000212357	0.865892	0.694	0.481	0.349539	MA1405.1	SIZF2
MA0662.1	0.000213359	0.876638	0.694	0.485	0.35119	MA0662.1	MIXL1
MA0346.1	0.000232038	1.06701	0.837	0.534	0.381934	MA0346.1	NHP6B
MA0573.1	0.000247869	0.75597	0.694	0.459	0.407993	MA0573.1	ATHB-9
MA0585.1	0.000254898	0.725232	0.714	0.476	0.419562	MA0585.1	AGL1
MA0378.1	0.000263057	0.700978	0.694	0.503	0.432991	MA0378.1	SFP1
MA0367.1	0.000265425	0.717103	0.694	0.476	0.436889	MA0367.1	RGT1
MA1632.1	0.000265489	0.259483	0.735	0.482	0.436994	MA1632.1	ATF2
MA0775.1	0.000268679	0.424217	0.673	0.455	0.442246	MA0775.1	MEIS3
MA0058.3	0.000269568	0.995802	0.714	0.5	0.443708	MA0058.3	MAX
MA1418.1	0.000271322	0.517998	0.633	0.434	0.446596	MA1418.1	IRF3
MA0037.3	0.00027316	1.00547	0.612	0.447	0.449621	MA0037.3	GATA3
MA0433.1	0.000283207	0.861685	0.755	0.49	0.466159	MA0433.1	YOX1
MA0630.1	0.000283207	0.861685	0.755	0.49	0.466159	MA0630.1	SHOX
MA0721.1	0.000283207	0.861685	0.755	0.49	0.466159	MA0721.1	UNCX
MA0429.1	0.000289962	0.483322	0.796	0.49	0.477277	MA0429.1	YLL054C
MA1292.1	0.000325922	0.635986	0.694	0.493	0.536467	MA1292.1	MYB27
MA0551.1	0.000331583	1.00654	0.612	0.482	0.545785	MA0551.1	HY5
MA0387.1	0.000337593	1.62388	0.673	0.503	0.555679	MA0387.1	SPT2
MA0022.1	0.000338082	0.798124	0.735	0.459	0.556483	MA0022.1	dl
MA1701.1	0.000355814	0.534976	0.694	0.456	0.585669	MA1701.1	elt-2
MA0752.1	0.00035865	0.518796	0.694	0.471	0.590338	MA0752.1	ZNF410
MA0918.1	0.00036324	0.531746	0.673	0.476	0.597893	MA0918.1	unc-62
MA0517.1	0.000375934	0.746941	0.531	0.441	0.618787	MA0517.1	STAT1::STAT2
MA1681.1	0.000376593	0.5033	0.735	0.474	0.619872	MA1681.1	SRM1
MA1692.1	0.000379237	0.913346	0.633	0.463	0.624224	MA1692.1	ARF29
MA1115.1	0.000379743	0.835832	0.673	0.482	0.625058	MA1115.1	POU5F1
MA0485.2	0.000393132	4.79525	0.714	0.4	0.647095	MA0485.2	HOXC9
MA0866.1	0.000394923	0.649275	0.694	0.461	0.650044	MA0866.1	SOX21
MA1379.1	0.000418013	0.995573	0.735	0.512	0.68805	MA1379.1	SOL1
MA0407.1	0.000418835	0.715622	0.592	0.444	0.689402	MA0407.1	THI2
MA0412.1	0.000425647	0.579364	0.735	0.481	0.700615	MA0412.1	UME6
MA1205.1	0.000431271	0.615415	0.755	0.476	0.709872	MA1205.1	AGL6
MA1352.1	0.000451804	1.03114	0.694	0.48	0.74367	MA1352.1	TRP1
MA1041.1	0.000454109	0.679758	0.673	0.482	0.747464	MA1041.1	MYB55
MA1280.1	0.000455389	0.758948	0.694	0.462	0.749571	MA1280.1	OBP4
MA1651.1	0.00046128	0.69364	0.612	0.472	0.759267	MA1651.1	ZFP42
MA0373.1	0.000480497	1.56516	0.633	0.486	0.790899	MA0373.1	RPN4
MA1177.1	0.000484936	0.476615	0.714	0.494	0.798205	MA1177.1	MYB65
MA1360.1	0.000488757	0.636649	0.714	0.496	0.804494	MA1360.1	bHLH74
MA0974.2	0.000495649	0.58145	0.735	0.475	0.815838	MA0974.2	CDF3
MA0430.1	0.000511067	0.672136	0.735	0.459	0.841216	MA0430.1	YLR278C
MA0294.1	0.000544913	0.896311	0.612	0.481	0.896927	MA0294.1	EDS1
MA0060.3	0.000549276	0.368151	0.735	0.545	0.904109	MA0060.3	NFYA
MA1524.1	0.00059002	0.413068	0.612	0.462	0.971173	MA1524.1	MSGN1
MA0092.1	0.000594518	0.576995	0.673	0.444	0.978576	MA0092.1	Hand1::Tcf3
MA0025.2	0.000596905	0.564141	0.592	0.47	0.982505	MA0025.2	NFIL3
MA1027.1	0.000605069	0.951364	0.612	0.487	0.995943	MA1027.1	KAN1
MA0417.1	0.00065641	0.320645	0.714	0.446	1	MA0417.1	YAP5
MA0279.1	0.00065893	0.274927	0.755	0.471	1	MA0279.1	CAD1
MA1389.1	0.000724382	0.692011	0.673	0.485	1	MA1389.1	PHL1
MA0336.1	0.000765176	1.01863	0.633	0.479	1	MA0336.1	MGA1
MA1277.1	0.000792708	0.331488	0.633	0.452	1	MA1277.1	Adof1
MA0925.1	0.00081005	0.36922	0.673	0.461	1	MA0925.1	sma-4
MA1436.1	0.000835425	0.874637	0.673	0.501	1	MA1436.1	nuc-1
MA0410.1	0.00086276	1.06833	0.673	0.508	1	MA0410.1	UGA3
MA1204.1	0.000873521	0.692645	0.735	0.492	1	MA1204.1	AGL13
MA1583.1	0.000927309	0.556975	0.673	0.475	1	MA1583.1	ZFP57
MA0050.2	0.000943659	1.01337	0.51	0.456	1	MA0050.2	IRF1
MA0095.2	0.000972268	0.650959	0.673	0.471	1	MA0095.2	YY1
MA0906.1	0.00101645	3.7221	0.653	0.439	1	MA0906.1	HOXC12
MA0323.1	0.00104835	0.702374	0.633	0.446	1	MA0323.1	IXR1
MA1478.1	0.00106252	0.905729	0.633	0.472	1	MA1478.1	DMRTA2
MA0197.2	0.00107278	0.539789	0.735	0.496	1	MA0197.2	nub
MA1623.1	0.00110347	0.312305	0.673	0.442	1	MA1623.1	Stat2
MA1384.1	0.00110711	0.524433	0.633	0.488	1	MA1384.1	PHL7
MA0673.1	0.00112638	1.66893	0.612	0.488	1	MA0673.1	NKX2-8
MA1404.1	0.00114268	0.392858	0.714	0.454	1	MA1404.1	BPC1
MA0945.1	0.00114571	0.402515	0.653	0.471	1	MA0945.1	ARR1
MA0633.1	0.00115938	0.940773	0.633	0.47	1	MA0633.1	Twist2
MA1358.1	0.0011687	0.538342	0.633	0.472	1	MA1358.1	bHLH130
MA0023.1	0.00117639	0.437502	0.633	0.455	1	MA0023.1	dl(var.2)
MA0119.1	0.00124472	0.927332	0.592	0.468	1	MA0119.1	NFIC::TLX1
MA1039.1	0.00131219	0.414935	0.714	0.496	1	MA1039.1	MYB4
MA0629.1	0.00133974	0.506021	0.673	0.478	1	MA0629.1	Rhox11
MA1665.1	0.00139546	0.501333	0.612	0.451	1	MA1665.1	HSFB2A
MA1162.1	0.00148391	0.786992	0.796	0.501	1	MA1162.1	TCX2
MA1657.1	0.00165193	0.279358	0.673	0.478	1	MA1657.1	ZNF652
MA0424.1	0.00167871	1.15361	0.633	0.484	1	MA0424.1	YER184C
MA1189.1	0.0017098	0.578167	0.612	0.482	1	MA1189.1	AT5G61620
MA0908.1	0.00175508	3.11224	0.714	0.431	1	MA0908.1	HOXD11
MA1589.1	0.00176293	0.420394	0.592	0.454	1	MA1589.1	ZNF140
MA1644.1	0.00176523	0.284019	0.755	0.54	1	MA1644.1	NFYC
MA1076.2	0.00177258	0.651535	0.653	0.477	1	MA1076.2	WRKY15
MA1491.1	0.00195056	0.569367	0.612	0.479	1	MA1491.1	GLI3
MA1061.1	0.00197627	0.636649	0.735	0.505	1	MA1061.1	SPT
MA0977.1	0.00199159	0.441769	0.735	0.486	1	MA0977.1	DOF2.5
MA1163.1	0.00205477	0.798819	0.653	0.484	1	MA1163.1	PHL11
MA0652.1	0.00222157	0.885248	0.551	0.461	1	MA0652.1	IRF8
MA0355.1	0.00223566	0.403258	0.571	0.464	1	MA0355.1	PHD1
MA0561.1	0.002239	0.311632	0.714	0.5	1	MA0561.1	PIF4
MA1186.1	0.00226043	0.319912	0.714	0.487	1	MA1186.1	At1g49010
MA0348.1	0.00231171	0.518054	0.673	0.483	1	MA0348.1	OAF1
MA0895.1	0.0023225	0.388185	0.633	0.483	1	MA0895.1	HMBOX1
MA0703.2	0.00240049	0.463963	0.735	0.51	1	MA0703.2	LMX1B
MA1190.1	0.00246296	0.338827	0.633	0.476	1	MA1190.1	RVE5
MA0651.1	0.00249521	0.892554	0.673	0.433	1	MA0651.1	HOXC11
MA0011.1	0.0024954	0.457466	0.653	0.486	1	MA0011.1	br(var.2)
MA0072.1	0.00250547	0.465362	0.673	0.478	1	MA0072.1	RORA(var.2)
MA1012.1	0.0025454	0.396679	0.673	0.469	1	MA1012.1	AGL27
MA0530.1	0.00254877	0.323444	0.673	0.461	1	MA0530.1	cnc::maf-S
MA0694.1	0.00266302	0.841827	0.571	0.478	1	MA0694.1	ZBTB7B
MA1528.1	0.00267575	0.510198	0.653	0.469	1	MA1528.1	NFIX(var.2)
MA0450.1	0.0028616	0.50575	0.694	0.5	1	MA0450.1	hkb
MA0911.1	0.00300842	3.96822	0.735	0.441	1	MA0911.1	Hoxa11
MA0905.1	0.003584	2.89749	0.612	0.431	1	MA0905.1	HOXC10
MA0646.1	0.00378009	0.464523	0.653	0.478	1	MA0646.1	GCM1
MA0244.1	0.00383041	1.25482	0.612	0.472	1	MA0244.1	slbo
MA1594.1	0.00385543	0.489441	0.612	0.481	1	MA1594.1	ZNF382
MA0897.1	0.00410365	0.815986	0.633	0.476	1	MA0897.1	Hmx2
MA0560.1	0.00412114	1.04912	0.612	0.484	1	MA0560.1	PIF3
MA0870.1	0.00414261	0.62777	0.633	0.454	1	MA0870.1	Sox1
MA1193.1	0.00421347	0.547874	0.633	0.488	1	MA1193.1	At2g38090
MA0247.2	0.00443583	1.4548	0.571	0.461	1	MA0247.2	tin
MA0335.1	0.00461516	0.452275	0.592	0.458	1	MA0335.1	MET4
MA0687.1	0.00524084	0.560345	0.571	0.456	1	MA0687.1	SPIC
MA1046.1	0.00532466	0.582613	0.592	0.505	1	MA1046.1	NTL9
MA0384.1	0.005541	0.269593	0.653	0.483	1	MA0384.1	SNT2
MA0165.1	0.00558934	0.33038	0.612	0.406	1	MA0165.1	Abd-B
MA1270.1	0.0056464	0.38403	0.592	0.444	1	MA1270.1	AT3G45610
MA0555.1	0.00574188	0.673579	0.633	0.469	1	MA0555.1	SVP
MA0069.1	0.00593018	0.285224	0.653	0.452	1	MA0069.1	PAX6
MA1357.1	0.00597021	0.493907	0.592	0.473	1	MA1357.1	bHLH80
MA1381.1	0.00604678	0.518019	0.551	0.467	1	MA1381.1	AT3G46070
MA0266.1	0.00688236	0.708002	0.653	0.463	1	MA0266.1	ABF2
MA0026.1	0.00734994	1.05959	0.633	0.486	1	MA0026.1	Eip74EF
MA0671.1	0.00740176	1.04683	0.531	0.48	1	MA0671.1	NFIX
MA0554.1	0.00749663	0.541319	0.592	0.462	1	MA0554.1	SOC1
MA1600.1	0.00750762	0.703469	0.612	0.479	1	MA1600.1	ZNF684
MA0304.1	0.00777372	0.416755	0.633	0.454	1	MA0304.1	GCR1
MA0917.1	0.00806146	0.288866	0.673	0.473	1	MA0917.1	gcm2
MA1325.1	0.00815947	0.60001	0.551	0.473	1	MA1325.1	GATA14
MA0953.1	0.00836768	0.392256	0.571	0.484	1	MA0953.1	ATHB-6
MA1194.1	0.00869949	0.417755	0.633	0.489	1	MA1194.1	AT3G10580
MA1167.1	0.00871214	0.688641	0.673	0.498	1	MA1167.1	EFM
MA0422.1	0.00875048	0.35118	0.653	0.487	1	MA0422.1	URC2
MA0193.1	0.00879485	0.383617	0.673	0.478	1	MA0193.1	schlank
MA1365.2	0.00981542	0.768886	0.612	0.495	1	MA1365.2	AT5G47660
MA1663.1	0.0100636	0.295929	0.653	0.477	1	MA1663.1	ANAC050
MA1117.1	0.0124522	0.524758	0.571	0.45	1	MA1117.1	RELB
MA0435.1	0.0124548	0.577373	0.612	0.493	1	MA0435.1	YPR015C
MA0005.2	0.0127048	0.34082	0.673	0.475	1	MA0005.2	AG
MA0328.2	0.0130547	0.316151	0.633	0.468	1	MA0328.2	MATALPHA2
MA1195.1	0.013139	0.396572	0.592	0.484	1	MA1195.1	AT5G56840
MA0036.3	0.0134931	0.279954	0.592	0.445	1	MA0036.3	GATA2
MA0901.2	0.0137693	0.606424	0.653	0.497	1	MA0901.2	HOXB13
MA0947.1	0.0143848	0.310083	0.592	0.475	1	MA0947.1	ARR14
MA0788.1	0.0147574	0.264478	0.673	0.496	1	MA0788.1	POU3F3
MA1546.1	0.0154964	0.438992	0.694	0.488	1	MA1546.1	PAX3(var.2)
MA1385.1	0.0162652	0.633923	0.592	0.476	1	MA1385.1	AT2G40260
MA0990.1	0.017098	0.553112	0.592	0.486	1	MA0990.1	EDT1
MA1540.1	0.0179823	0.675171	0.612	0.474	1	MA1540.1	NR5A1
MA1409.1	0.0183931	0.263407	0.633	0.477	1	MA1409.1	OsRR22
MA1030.1	0.0191675	0.326966	0.592	0.484	1	MA1030.1	P0510F09.23
MA1040.1	0.0203858	0.615784	0.592	0.494	1	MA1040.1	MYB46
MA0896.1	0.0216707	0.256355	0.592	0.469	1	MA0896.1	Hmx1
MA1087.1	0.0233995	0.295177	0.51	0.464	1	MA1087.1	WRKY45
MA0301.1	0.0234822	0.927275	0.633	0.488	1	MA0301.1	GAT3
MA0898.1	0.0241455	0.647219	0.612	0.493	1	MA0898.1	Hmx3
MA1661.1	0.0280115	0.385697	0.592	0.484	1	MA1661.1	AT-GTL1
MA0398.1	0.028291	0.272136	0.673	0.513	1	MA0398.1	SUM1
MA1383.1	0.030043	0.316059	0.612	0.496	1	MA1383.1	KAN2
MA0370.1	0.03054	0.30738	0.551	0.433	1	MA0370.1	RME1
MA1283.1	0.0334124	0.568275	0.592	0.488	1	MA1283.1	TCP14
MA0704.1	0.0372033	0.622647	0.612	0.466	1	MA0704.1	Lhx4
MA1541.1	0.0403438	0.495521	0.653	0.519	1	MA1541.1	NR6A1
MA1479.1	0.0458146	0.538204	0.551	0.488	1	MA1479.1	DMRTC2
MA0657.1	0.049873	0.31765	0.612	0.517	1	MA0657.1	KLF13
MA0442.2	0.0502654	0.334102	0.592	0.454	1	MA0442.2	SOX10
MA0955.1	0.0518162	0.385558	0.551	0.478	1	MA0955.1	POPTR_0002s00440g
MA0127.1	0.0538037	0.66368	0.592	0.51	1	MA0127.1	PEND
MA0864.2	0.054936	0.891033	0.612	0.491	1	MA0864.2	E2F2
MA0635.1	0.0557128	0.575609	0.612	0.492	1	MA0635.1	BARHL2
MA0289.1	0.0576789	0.505841	0.571	0.483	1	MA0289.1	DAL80
MA0465.2	0.0601014	1.6569	0.571	0.421	1	MA0465.2	CDX2
MA0507.1	0.060678	0.28251	0.551	0.493	1	MA0507.1	POU2F2
MA0634.1	0.0607148	0.327155	0.633	0.47	1	MA0634.1	ALX3
MA1649.1	0.0608936	0.539395	0.531	0.46	1	MA1649.1	ZBTB12
MA1408.1	0.0630017	0.438738	0.612	0.485	1	MA1408.1	FaEOBII
MA0483.1	0.0644461	0.387464	0.551	0.481	1	MA0483.1	Gfi1b
MA1075.1	0.0683278	0.368744	0.51	0.464	1	MA1075.1	WRKY12
MA1084.1	0.0683278	0.368744	0.51	0.464	1	MA1084.1	WRKY38
MA1534.1	0.0686354	0.456226	0.571	0.488	1	MA1534.1	NR1I3
MA1016.1	0.0743293	0.516568	0.653	0.482	1	MA1016.1	GATA15
MA1293.1	0.0754219	0.623958	0.551	0.483	1	MA1293.1	MYB57
MA0159.1	0.078767	0.510547	0.571	0.463	1	MA0159.1	RARA::RXRA
MA1678.1	0.0849366	1.41412	0.49	0.482	1	MA1678.1	NTL8
MA1682.1	0.0857399	0.319848	0.551	0.489	1	MA1682.1	TCX3
MA1355.1	0.0875996	0.253059	0.612	0.493	1	MA1355.1	TBP3
MA0390.1	0.0891409	0.359691	0.531	0.477	1	MA0390.1	STB3
MA1386.1	0.0925208	0.395781	0.551	0.491	1	MA1386.1	HHO3
MA1570.1	0.102615	0.274428	0.571	0.488	1	MA1570.1	TFAP4(var.2)
MA0681.2	0.105906	0.375004	0.612	0.529	1	MA0681.2	PHOX2B
MA0264.1	0.117536	0.600476	0.531	0.473	1	MA0264.1	ceh-22
MA0541.1	0.144699	0.45722	0.633	0.492	1	MA0541.1	efl-1
MA0672.1	0.145352	0.891005	0.49	0.49	1	MA0672.1	NKX2-3
MA1116.1	0.153047	0.82829	0.449	0.451	1	MA1116.1	RBPJ
MA1476.1	0.168723	0.696581	0.592	0.472	1	MA1476.1	DLX5
MA1054.1	0.191288	0.288246	0.449	0.492	1	MA1054.1	ARALYDRAFT_897773
MA0024.3	0.197242	0.758486	0.51	0.487	1	MA0024.3	E2F1
MA1168.1	0.201425	0.416861	0.551	0.499	1	MA1168.1	MYR2
MA0470.2	0.213642	0.965225	0.571	0.496	1	MA0470.2	E2F4
MA0536.1	0.236007	0.257652	0.51	0.476	1	MA0536.1	pnr
MA0469.3	0.268479	0.406387	0.49	0.486	1	MA0469.3	E2F3
MA0778.1	0.44019	0.541261	0.347	0.47	1	MA0778.1	NFKB2
MA0865.1	0.852207	0.405938	0.367	0.469	1	MA0865.1	E2F8
MA1696.1	0.92549	0.481055	0.429	0.472	1	MA1696.1	ARF39

## Sheet: 7 HB
	p_val	avg_log2FC	pct.1	pct.2	p_val_adj	motif	motif.name
MA0142.1	5.96544e-18	2.73516	0.931	0.458	9.81911e-15	MA0142.1	Pou5f1::Sox2
MA0789.1	6.81348e-10	1.95361	0.862	0.49	1.1215e-06	MA0789.1	POU3F4
MA0787.1	1.19932e-08	1.91302	0.828	0.495	1.97408e-05	MA0787.1	POU3F2
MA0792.1	1.27071e-08	1.58222	0.897	0.496	2.09158e-05	MA0792.1	POU5F1B
MA0785.1	2.10595e-07	1.37288	0.828	0.49	0.00034664	MA0785.1	POU2F1
MA1115.1	1.02513e-05	1.11293	0.862	0.481	0.0168736	MA1115.1	POU5F1
MA0784.1	1.22682e-05	1.3034	0.862	0.5	0.0201935	MA0784.1	POU1F1
MA0197.2	1.43776e-05	0.922481	0.793	0.498	0.0236656	MA0197.2	nub
MA0173.1	3.3349e-05	1.14153	0.828	0.475	0.0548925	MA0173.1	CG11617
MA0507.1	0.000100864	0.738853	0.862	0.49	0.166022	MA0507.1	POU2F2
MA1035.1	0.000183973	0.991149	0.621	0.49	0.302819	MA1035.1	TCP4
MA0627.2	0.000231497	0.764554	0.793	0.482	0.381044	MA0627.2	POU2F3
MA0070.1	0.000360013	0.552565	0.828	0.488	0.592582	MA0070.1	PBX1
MA0932.1	0.0003635	1.23801	0.69	0.49	0.59832	MA0932.1	AHL12
MA0934.1	0.0003635	1.23801	0.69	0.49	0.59832	MA0934.1	AHL25
MA0786.1	0.00111538	0.476921	0.759	0.493	1	MA0786.1	POU3F1
MA1102.2	0.00129401	0.34098	0.897	0.511	1	MA1102.2	CTCFL
MA0301.1	0.00129509	0.909551	0.621	0.489	1	MA0301.1	GAT3
MA1289.1	0.00136481	0.727354	0.69	0.483	1	MA1289.1	TCP3
MA0473.3	0.00190264	3.29664	0.724	0.469	1	MA0473.3	ELF1
MA0788.1	0.00223553	0.74059	0.793	0.496	1	MA0788.1	POU3F3
MA1674.1	0.00275976	1.01963	0.655	0.48	1	MA1674.1	NAC017
MA1695.1	0.00281137	0.772709	0.69	0.467	1	MA1695.1	ARF36
MA0087.1	0.00298429	0.392345	0.69	0.482	1	MA0087.1	Sox5
MA0059.1	0.00306068	0.514837	0.759	0.49	1	MA0059.1	MAX::MYC
MA0389.1	0.00336499	0.841098	0.69	0.499	1	MA0389.1	SRD1
MA1427.1	0.00359552	0.664475	0.759	0.469	1	MA1427.1	NAC028
MA1018.1	0.0044558	0.752116	0.759	0.474	1	MA1018.1	GATA9
MA1013.1	0.00462714	0.684676	0.621	0.482	1	MA1013.1	GATA10
MA1015.1	0.00462714	0.684676	0.621	0.482	1	MA1015.1	GATA12
MA0337.1	0.00594928	0.418868	0.655	0.489	1	MA0337.1	MIG1
MA1181.1	0.00716519	0.34236	0.724	0.489	1	MA1181.1	MYB113
MA0302.1	0.00788595	0.522174	0.759	0.476	1	MA0302.1	GAT4
MA1455.1	0.00839411	0.338546	0.621	0.473	1	MA1455.1	dmrt99B
MA1322.1	0.00875614	0.504417	0.724	0.48	1	MA1322.1	SPL9
MA1291.1	0.0103695	0.765045	0.655	0.491	1	MA1291.1	TCP7
MA0210.1	0.0109827	0.53048	0.793	0.462	1	MA0210.1	ara
MA0217.1	0.0109827	0.53048	0.793	0.462	1	MA0217.1	caup
MA0761.2	0.0113979	4.18172	0.69	0.449	1	MA0761.2	ETV1
MA1434.1	0.0135868	0.775085	0.621	0.483	1	MA1434.1	NCU02182
MA0765.2	0.0170369	3.33705	0.586	0.506	1	MA0765.2	ETV5
MA0062.3	0.0182369	2.61526	0.621	0.462	1	MA0062.3	GABPA
MA0454.1	0.0194805	0.297842	0.586	0.468	1	MA0454.1	odd
MA1400.1	0.0199429	0.353886	0.724	0.485	1	MA1400.1	At1g19000
MA0152.1	0.0207492	0.318776	0.586	0.446	1	MA0152.1	NFATC2
MA0737.1	0.0221641	0.747915	0.586	0.476	1	MA0737.1	GLIS3
MA1686.1	0.0223296	0.429904	0.655	0.479	1	MA1686.1	ARF13
MA1096.1	0.0226952	0.361115	0.655	0.494	1	MA1096.1	ARALYDRAFT_496250
MA1093.1	0.0232522	0.371201	0.655	0.479	1	MA1093.1	WRKY75
MA0421.1	0.0244343	0.324922	0.621	0.487	1	MA0421.1	NSI1
MA1014.1	0.0252048	0.545205	0.655	0.48	1	MA1014.1	GATA11
MA1676.1	0.0255233	0.851219	0.655	0.488	1	MA1676.1	NAC062
MA1450.1	0.0262316	0.710199	0.655	0.491	1	MA1450.1	lin-54
MA0598.3	0.0265373	2.47853	0.586	0.464	1	MA0598.3	EHF
MA0193.1	0.0290638	0.407811	0.586	0.481	1	MA0193.1	schlank
MA0076.2	0.0297035	1.94476	0.69	0.482	1	MA0076.2	ELK4
MA0318.1	0.0330354	0.396485	0.69	0.487	1	MA0318.1	HMRA2
MA1439.1	0.0334157	0.268245	0.276	0.471	1	MA1439.1	elt-6
MA1012.1	0.0335971	0.354113	0.69	0.471	1	MA1012.1	AGL27
MA1038.1	0.0338057	0.266417	0.69	0.478	1	MA1038.1	MYB3
MA1039.1	0.0348865	0.407244	0.621	0.499	1	MA1039.1	MYB4
MA0136.2	0.0353847	1.72378	0.724	0.496	1	MA0136.2	ELF5
MA1287.1	0.0367913	0.657683	0.552	0.49	1	MA1287.1	TCP21
MA1282.1	0.0384253	0.341264	0.655	0.492	1	MA1282.1	PTF1
MA0474.2	0.0422349	1.84795	0.552	0.468	1	MA0474.2	ERG
MA1036.1	0.0423812	0.27313	0.69	0.489	1	MA1036.1	MYB111
MA0333.1	0.0438306	0.403432	0.621	0.476	1	MA0333.1	MET31
MA1430.1	0.044695	0.586417	0.621	0.5	1	MA1430.1	TB1
MA0339.1	0.0462586	0.784854	0.517	0.462	1	MA0339.1	MIG3
MA0606.1	0.0470292	0.298716	0.69	0.458	1	MA0606.1	NFAT5
MA0750.2	0.0516567	2.06149	0.69	0.483	1	MA0750.2	ZBTB7A
MA0819.1	0.0527734	1.47152	0.586	0.482	1	MA0819.1	CLOCK
MA0054.1	0.0628008	0.595164	0.586	0.48	1	MA0054.1	myb.Ph3
MA1175.1	0.0642563	2.53379	0.655	0.487	1	MA1175.1	MYB81
MA1483.1	0.0686272	1.05714	0.552	0.474	1	MA1483.1	ELF2
MA0378.1	0.0693167	0.410555	0.621	0.505	1	MA0378.1	SFP1
MA0338.1	0.0717411	0.526404	0.586	0.495	1	MA0338.1	MIG2
MA0640.2	0.0772509	2.87426	0.586	0.46	1	MA0640.2	ELF3
MA0402.1	0.0774235	0.507663	0.621	0.485	1	MA0402.1	SWI5
MA0249.2	0.077554	3.8026	0.207	0.465	1	MA0249.2	twi
MA0886.1	0.0803216	0.376163	0.517	0.471	1	MA0886.1	EMX2
MA0933.1	0.0855923	0.354472	0.552	0.495	1	MA0933.1	AHL20
MA0645.1	0.0856688	0.535371	0.759	0.48	1	MA0645.1	ETV6
MA0274.1	0.0874924	0.593259	0.621	0.48	1	MA0274.1	ARR1
MA1290.1	0.103571	0.350307	0.69	0.497	1	MA1290.1	TCP17
MA1066.1	0.104088	0.332701	0.69	0.487	1	MA1066.1	TCP23
MA1300.1	0.106452	0.384245	0.655	0.455	1	MA1300.1	WRKY6
MA0764.2	0.113406	2.93165	0.552	0.458	1	MA0764.2	ETV4
MA0334.1	0.114111	0.474808	0.586	0.494	1	MA0334.1	MET32
MA1268.1	0.120092	0.301139	0.586	0.461	1	MA1268.1	AT1G69570
MA1436.1	0.125345	0.323251	0.621	0.504	1	MA1436.1	nuc-1
MA1371.1	0.126223	0.276647	0.517	0.464	1	MA1371.1	IDD4
MA1064.1	0.12973	0.456203	0.586	0.498	1	MA1064.1	TCP2
MA1588.1	0.130904	0.33179	0.586	0.482	1	MA1588.1	ZNF136
MA1060.1	0.131179	0.396825	0.621	0.495	1	MA1060.1	SPL7
MA1237.1	0.135123	0.368062	0.517	0.476	1	MA1237.1	AT4G16750
MA0267.1	0.139862	0.439922	0.552	0.474	1	MA0267.1	ACE2
MA1056.1	0.146604	0.407742	0.655	0.482	1	MA1056.1	SPL11
MA1374.1	0.156533	0.378723	0.552	0.461	1	MA1374.1	IDD7
MA0700.2	0.15943	0.460705	0.552	0.482	1	MA0700.2	LHX2
MA0098.3	0.166387	0.743219	0.586	0.473	1	MA0098.3	ETS1
MA0436.1	0.168826	0.2873	0.483	0.451	1	MA0436.1	YPR022C
MA0578.1	0.176098	0.482652	0.517	0.493	1	MA0578.1	SPL8
MA1396.1	0.176215	0.359404	0.586	0.473	1	MA1396.1	GATA6
MA1189.1	0.17795	0.290879	0.517	0.485	1	MA1189.1	AT5G61620
MA1216.1	0.182617	0.257947	0.552	0.492	1	MA1216.1	RAP21
MA1660.1	0.195369	0.30643	0.69	0.485	1	MA1660.1	ANAC13
MA1260.1	0.200927	0.731595	0.517	0.478	1	MA1260.1	AT1G77640
MA0738.1	0.206487	0.36283	0.517	0.461	1	MA0738.1	HIC2
MA0551.1	0.210571	0.340356	0.621	0.483	1	MA0551.1	HY5
MA0955.1	0.235135	0.287878	0.552	0.479	1	MA0955.1	POPTR_0002s00440g
MA1619.1	0.256769	1.77363	0.552	0.46	1	MA1619.1	Ptf1a(var.2)
MA1063.1	0.261642	0.395662	0.552	0.47	1	MA1063.1	TCP19
MA0631.1	0.277119	0.818066	0.552	0.486	1	MA0631.1	Six3
MA0759.1	0.288943	0.295343	0.552	0.491	1	MA0759.1	ELK3
MA0041.1	0.2938	1.09588	0.586	0.485	1	MA0041.1	Foxd3
MA1685.1	0.30565	0.271345	0.586	0.474	1	MA1685.1	ARF10
MA0956.1	0.307555	0.309163	0.621	0.493	1	MA0956.1	BEE2
MA1123.2	0.315395	5.00721	0.483	0.461	1	MA1123.2	TWIST1
MA1690.1	0.333165	0.581733	0.586	0.468	1	MA1690.1	ARF25
MA0698.1	0.345184	5.88821	0.552	0.483	1	MA0698.1	ZBTB18
MA0261.1	0.346185	0.366172	0.483	0.46	1	MA0261.1	lin-14
MA1108.2	0.346525	3.94726	0.414	0.467	1	MA1108.2	MXI1
MA0299.1	0.354653	0.362135	0.552	0.48	1	MA0299.1	GAL4
MA0441.1	0.372782	0.29797	0.483	0.479	1	MA0441.1	ZMS1
MA0390.1	0.381905	0.40194	0.448	0.479	1	MA0390.1	STB3
MA0611.1	0.393211	0.567358	0.552	0.48	1	MA0611.1	Dux
MA1665.1	0.427652	0.862138	0.414	0.455	1	MA1665.1	HSFB2A
MA1641.1	0.435125	1.06095	0.517	0.445	1	MA1641.1	MYF5
MA0350.1	0.435297	0.275053	0.414	0.476	1	MA0350.1	TOD6
MA1484.1	0.452328	0.25806	0.517	0.479	1	MA1484.1	ETS2
MA0108.2	0.460956	0.285326	0.448	0.479	1	MA0108.2	TBP
MA1153.1	0.487209	0.579321	0.483	0.473	1	MA1153.1	Smad4
MA1508.1	0.502539	0.540725	0.483	0.46	1	MA1508.1	IKZF1
MA0262.1	0.517929	0.627381	0.448	0.469	1	MA0262.1	mab-3
MA1310.1	0.535319	1.26644	0.483	0.492	1	MA1310.1	WRKY42
MA1664.1	0.538416	1.17267	0.379	0.459	1	MA1664.1	HSFA6B
MA1323.1	0.545973	0.275649	0.414	0.479	1	MA1323.1	GATA19
MA0633.1	0.548505	1.96189	0.345	0.475	1	MA0633.1	Twist2
MA0917.1	0.551246	0.309473	0.414	0.478	1	MA0917.1	gcm2
MA0760.1	0.559591	0.62328	0.483	0.471	1	MA0760.1	ERF
MA0930.1	0.683613	2.87467	0.414	0.484	1	MA0930.1	ABF3
MA1666.1	0.714101	0.903958	0.276	0.449	1	MA1666.1	HSFB2B
MA1618.1	0.718185	1.22654	0.379	0.447	1	MA1618.1	Ptf1a
MA1444.1	0.719102	0.669869	0.448	0.489	1	MA1444.1	cebp-1
MA0081.2	0.720214	0.551241	0.448	0.445	1	MA0081.2	SPIB
MA1437.1	0.840623	0.390968	0.379	0.492	1	MA1437.1	wc-1
MA0577.2	0.842976	0.290827	0.483	0.493	1	MA0577.2	SPL3
MA0762.1	0.874249	1.26528	0.483	0.479	1	MA0762.1	ETV2
MA1468.1	0.900395	0.873915	0.414	0.492	1	MA1468.1	ATOH7
MA1361.1	0.902264	0.276868	0.379	0.497	1	MA1361.1	bHLH18
MA0415.1	0.903513	0.636254	0.517	0.48	1	MA0415.1	YAP1
MA1667.1	0.906989	0.449435	0.448	0.442	1	MA1667.1	HSFC1
MA0771.1	0.929203	0.58214	0.483	0.452	1	MA0771.1	HSF4
MA1472.1	0.950537	0.755482	0.448	0.435	1	MA1472.1	BHLHA15(var.2)
MA0156.2	0.960577	0.264464	0.448	0.493	1	MA0156.2	FEV
MA0817.1	0.972789	0.778974	0.276	0.481	1	MA0817.1	BHLHE23
MA1440.1	0.982893	0.291705	0.379	0.464	1	MA1440.1	fkh-9
MA1352.1	0.995333	0.642663	0.448	0.485	1	MA1352.1	TRP1

## Sheet: 8 MB.1
	p_val	avg_log2FC	pct.1	pct.2	p_val_adj	motif	motif.name
MA0056.2	1.72342e-20	0.395878	0.782	0.372	2.83674e-17	MA0056.2	MZF1
MA1599.1	1.00045e-19	1.27635	0.84	0.455	1.64674e-16	MA1599.1	ZNF682
MA0984.1	3.05788e-13	1.42809	0.672	0.432	5.03327e-10	MA0984.1	DOF5.7
MA0372.1	6.61007e-11	0.84992	0.773	0.467	1.08802e-07	MA0372.1	RPH1
MA1578.1	1.74867e-10	2.16265	0.647	0.435	2.87831e-07	MA1578.1	VEZF1
MA0508.3	3.87564e-10	0.949389	0.706	0.416	6.3793e-07	MA0508.3	PRDM1
MA0036.3	4.84496e-10	0.421306	0.79	0.43	7.97481e-07	MA0036.3	GATA2
MA0961.1	5.67872e-10	0.620285	0.706	0.463	9.34718e-07	MA0961.1	BHLH112
MA0035.4	9.74542e-10	0.689244	0.748	0.436	1.6041e-06	MA0035.4	GATA1
MA0413.1	2.19664e-09	0.771491	0.714	0.475	3.61567e-06	MA0413.1	USV1
MA0452.2	5.38009e-09	0.699126	0.731	0.447	8.85563e-06	MA0452.2	Kr
MA0753.2	2.15163e-08	1.90066	0.639	0.455	3.54159e-05	MA0753.2	ZNF740
MA1399.1	5.90695e-08	0.960128	0.731	0.466	9.72284e-05	MA1399.1	At5g08520
MA1353.1	7.25479e-08	0.669907	0.706	0.456	0.000119414	MA1353.1	AT1G72740
MA1522.1	1.02795e-07	0.699464	0.697	0.467	0.000169201	MA1522.1	MAZ
MA0482.2	1.20665e-07	0.693802	0.681	0.457	0.000198615	MA0482.2	GATA4
MA0285.1	1.60989e-07	0.710883	0.689	0.456	0.000264989	MA0285.1	CRZ1
MA1561.1	2.04487e-07	0.892187	0.613	0.443	0.000336586	MA1561.1	SOX12
MA0306.1	3.10401e-07	0.836379	0.723	0.475	0.00051092	MA0306.1	GIS1
MA0163.1	3.54205e-07	0.411438	0.723	0.464	0.000583022	MA0163.1	PLAG1
MA0460.1	3.76115e-07	0.971459	0.63	0.487	0.000619086	MA0460.1	ttk
MA1154.1	5.62324e-07	0.912653	0.672	0.441	0.000925586	MA1154.1	ZNF282
MA0504.1	1.93565e-06	0.430521	0.723	0.51	0.00318609	MA0504.1	NR2C2
MA0537.1	2.9202e-06	0.557259	0.605	0.425	0.00480665	MA0537.1	blmp-1
MA0341.1	3.07165e-06	0.278216	0.714	0.453	0.00505594	MA0341.1	MSN2
MA0342.1	3.07165e-06	0.278216	0.714	0.453	0.00505594	MA0342.1	MSN4
MA0366.1	3.07165e-06	0.278216	0.714	0.453	0.00505594	MA0366.1	RGM1
MA0065.2	4.2245e-06	0.758542	0.739	0.504	0.00695353	MA0065.2	Pparg::Rxra
MA1071.1	4.30289e-06	0.537181	0.622	0.43	0.00708255	MA1071.1	DOF5.3
MA0164.1	4.73534e-06	0.651177	0.664	0.433	0.00779437	MA0164.1	Nr2e3
MA0431.1	4.96913e-06	0.760948	0.63	0.468	0.00817918	MA0431.1	TDA9
MA0149.1	6.70676e-06	0.294979	0.605	0.42	0.0110393	MA0149.1	EWSR1-FLI1
MA1104.2	1.0222e-05	0.588466	0.664	0.46	0.0168254	MA1104.2	GATA6
MA0423.1	1.51482e-05	0.963496	0.605	0.438	0.0249339	MA0423.1	YER130C
MA0057.1	1.68158e-05	0.673814	0.655	0.451	0.0276788	MA0057.1	MZF1(var.2)
MA1397.1	1.80889e-05	0.671039	0.605	0.473	0.0297744	MA1397.1	At1g74840
MA0559.1	1.8801e-05	0.527087	0.613	0.41	0.0309464	MA0559.1	PI
MA1354.1	2.04855e-05	0.474096	0.597	0.466	0.0337191	MA1354.1	AT4G12670
MA1587.1	2.55871e-05	0.529787	0.639	0.477	0.0421164	MA1587.1	ZNF135
MA1653.1	3.55902e-05	0.472051	0.697	0.48	0.0585815	MA1653.1	ZNF148
MA1117.1	4.20604e-05	0.5579	0.622	0.444	0.0692314	MA1117.1	RELB
MA0364.1	4.42639e-05	0.284613	0.664	0.468	0.0728583	MA0364.1	REI1
MA1274.1	6.6922e-05	0.423627	0.63	0.454	0.110154	MA1274.1	OBP3
MA1398.2	6.87467e-05	0.736837	0.647	0.478	0.113157	MA1398.2	KUA1
MA0092.1	8.44598e-05	0.356934	0.639	0.438	0.139021	MA0092.1	Hand1::Tcf3
MA1630.1	0.00010552	0.37778	0.622	0.446	0.173686	MA1630.1	Znf281
MA1404.1	0.000118127	0.275262	0.63	0.45	0.194437	MA1404.1	BPC1
MA0080.5	0.000155661	0.585934	0.597	0.434	0.256218	MA0080.5	SPI1
MA0955.1	0.000262932	0.626147	0.571	0.475	0.432787	MA0955.1	POPTR_0002s00440g
MA1701.1	0.00026416	0.339658	0.639	0.452	0.434807	MA1701.1	elt-2
MA1643.1	0.000265278	0.81192	0.63	0.461	0.436648	MA1643.1	NFIB
MA1562.1	0.000273292	0.345042	0.597	0.431	0.449838	MA1562.1	SOX14
MA1408.1	0.000328106	0.348743	0.639	0.48	0.540062	MA1408.1	FaEOBII
MA1352.1	0.000439147	0.26095	0.647	0.476	0.722836	MA1352.1	TRP1
MA0576.1	0.000580489	0.60905	0.58	0.479	0.955485	MA0576.1	RAX3
MA0543.1	0.00074249	0.26011	0.63	0.455	1	MA0543.1	eor-1
MA0859.1	0.000869229	0.44322	0.672	0.5	1	MA0859.1	Rarg
MA1164.1	0.000983774	0.569632	0.563	0.467	1	MA1164.1	HHO5
MA1273.1	0.00105259	0.320843	0.622	0.439	1	MA1273.1	dof4.2
MA1665.1	0.00111811	0.560895	0.588	0.447	1	MA1665.1	HSFB2A
MA1278.1	0.00114047	0.35931	0.613	0.444	1	MA1278.1	OBP1
MA0121.1	0.00117684	0.369239	0.63	0.472	1	MA0121.1	ARR10
MA0118.1	0.00126672	0.436901	0.622	0.469	1	MA0118.1	Macho-1
MA0088.2	0.00127757	0.476361	0.555	0.465	1	MA0088.2	ZNF143
MA0258.2	0.00131215	0.483027	0.647	0.464	1	MA0258.2	ESR2
MA0677.1	0.00180074	0.264416	0.664	0.521	1	MA0677.1	Nr2f6
MA0542.1	0.00193381	0.369521	0.613	0.479	1	MA0542.1	elt-3
MA0124.2	0.00240739	0.352265	0.58	0.467	1	MA0124.2	Nkx3-1
MA1281.1	0.00287024	0.266158	0.588	0.457	1	MA1281.1	AT5G02460
MA1540.1	0.00301911	0.36567	0.597	0.471	1	MA1540.1	NR5A1
MA1403.1	0.00316848	0.472304	0.58	0.461	1	MA1403.1	BPC5
MA0119.1	0.00341275	0.353588	0.605	0.463	1	MA0119.1	NFIC::TLX1
MA0505.1	0.00343678	0.67654	0.613	0.48	1	MA0505.1	Nr5a2
MA1192.1	0.00349872	0.270009	0.63	0.475	1	MA1192.1	At5g58900
MA1270.1	0.00391865	0.382355	0.571	0.441	1	MA1270.1	AT3G45610
MA1358.1	0.00421377	0.312724	0.588	0.47	1	MA1358.1	bHLH130
MA1279.1	0.00455848	0.284418	0.613	0.453	1	MA1279.1	COG1
MA0319.1	0.00461497	0.398072	0.588	0.469	1	MA0319.1	HSF1
MA1272.1	0.00524257	0.320972	0.588	0.476	1	MA1272.1	AT2G28810
MA0403.1	0.00699839	0.335145	0.613	0.467	1	MA0403.1	TBF1
MA1388.1	0.00757379	0.45258	0.647	0.465	1	MA1388.1	AT3G24120
MA0050.2	0.00828696	0.385745	0.513	0.454	1	MA0050.2	IRF1
MA1527.1	0.00871154	0.261339	0.571	0.457	1	MA1527.1	NFIC(var.2)
MA0407.1	0.00951706	0.35033	0.597	0.439	1	MA0407.1	THI2
MA1654.1	0.00967768	0.584457	0.588	0.457	1	MA1654.1	ZNF16
MA1413.1	0.0107154	0.53776	0.529	0.476	1	MA1413.1	UIF1
MA0860.1	0.0108139	0.461574	0.571	0.479	1	MA0860.1	Rarg(var.2)
MA0949.1	0.0109694	0.362753	0.529	0.469	1	MA0949.1	ARR2
MA0309.1	0.0110111	0.262064	0.639	0.469	1	MA0309.1	GZF3
MA0264.1	0.0113138	0.265051	0.588	0.468	1	MA0264.1	ceh-22
MA0071.1	0.011536	0.438328	0.571	0.486	1	MA0071.1	RORA
MA1381.1	0.0115383	0.637265	0.58	0.463	1	MA1381.1	AT3G46070
MA0563.1	0.0173326	0.509011	0.504	0.44	1	MA0563.1	2022-09-03
MA1432.1	0.0194514	0.297046	0.529	0.446	1	MA1432.1	cre-1
MA0029.1	0.0200403	0.312423	0.521	0.461	1	MA0029.1	Mecom
MA0540.1	0.0201333	0.341113	0.546	0.456	1	MA0540.1	dpy-27
MA0977.1	0.0224403	0.493932	0.563	0.487	1	MA0977.1	DOF2.5
MA0766.2	0.0231553	0.335714	0.538	0.453	1	MA0766.2	GATA5
MA1418.1	0.0294059	0.432573	0.513	0.434	1	MA1418.1	IRF3
MA0114.4	0.0295742	0.419414	0.521	0.461	1	MA0114.4	HNF4A
MA0865.1	0.0309653	0.303405	0.571	0.461	1	MA0865.1	E2F8
MA0425.1	0.0323086	0.418335	0.555	0.456	1	MA0425.1	YGR067C
MA1065.2	0.0410332	0.558241	0.529	0.475	1	MA1065.2	TCP20
MA1414.1	0.0475138	0.472082	0.387	0.507	1	MA1414.1	E2FA
MA0347.1	0.0477593	0.285858	0.597	0.474	1	MA0347.1	NRG1
MA0484.2	0.0512706	0.370307	0.513	0.456	1	MA0484.2	HNF4G
MA1271.1	0.0517244	0.269965	0.555	0.473	1	MA1271.1	DAG2
MA0371.1	0.0568807	0.383107	0.504	0.438	1	MA0371.1	ROX1
MA0074.1	0.0582458	0.318401	0.546	0.47	1	MA0074.1	RXRA::VDR
MA1575.1	0.0668575	0.445896	0.546	0.491	1	MA1575.1	THRB(var.2)
MA0266.1	0.0723692	0.261045	0.504	0.465	1	MA0266.1	ABF2
MA1111.1	0.0935233	0.355047	0.555	0.491	1	MA1111.1	NR2F2
MA0643.1	0.118484	0.286615	0.546	0.487	1	MA0643.1	Esrrg
MA1168.1	0.125726	0.308916	0.58	0.496	1	MA1168.1	MYR2
MA0637.1	0.175933	0.666472	0.529	0.478	1	MA0637.1	CENPB
MA1163.1	0.188711	0.346414	0.563	0.484	1	MA1163.1	PHL11
MA0024.3	0.203764	0.284658	0.403	0.491	1	MA0024.3	E2F1
MA0470.2	0.232885	0.375338	0.395	0.502	1	MA0470.2	E2F4
MA0778.1	0.378303	0.37278	0.496	0.466	1	MA0778.1	NFKB2
MA0652.1	0.496726	0.312166	0.496	0.461	1	MA0652.1	IRF8
MA0501.1	0.52291	0.290683	0.353	0.367	1	MA0501.1	MAF::NFE2
MA1664.1	0.735355	0.256141	0.454	0.458	1	MA1664.1	HSFA6B
MA0867.2	0.871226	0.542214	0.529	0.453	1	MA0867.2	SOX4
MA0274.1	0.957816	0.267258	0.471	0.483	1	MA0274.1	ARR1

## Sheet: 9 MB.2
	p_val	avg_log2FC	pct.1	pct.2	p_val_adj	motif	motif.name
MA0648.1	2.36459e-69	7.74744	1	0.28	3.89211e-66	MA0648.1	GSC
MA0190.1	8.42711e-69	7.57297	1	0.277	1.3871e-65	MA0190.1	Gsc
MA0212.1	8.42711e-69	7.57297	1	0.277	1.3871e-65	MA0212.1	bcd
MA0234.1	8.42711e-69	7.57297	1	0.277	1.3871e-65	MA0234.1	oc
MA0201.1	1.28268e-68	8.58544	1	0.327	2.11129e-65	MA0201.1	Ptx1
MA0467.1	3.33055e-67	13.976	1	0.277	5.48208e-64	MA0467.1	Crx
MA1443.1	1.602e-66	6.5655	0.986	0.322	2.63689e-63	MA1443.1	unc-30
MA0714.1	9.56568e-66	5.62641	0.986	0.318	1.57451e-62	MA0714.1	PITX3
MA0682.2	2.66218e-65	5.83746	1	0.298	4.38195e-62	MA0682.2	PITX1
MA0891.1	2.222e-64	9.01723	1	0.291	3.65741e-61	MA0891.1	GSC2
MA1547.1	5.96752e-64	5.65546	0.986	0.332	9.82253e-61	MA1547.1	PITX2
MA0712.2	2.39844e-63	5.62689	1	0.293	3.94784e-60	MA0712.2	OTX2
MA0915.1	9.59668e-57	5.37488	1	0.357	1.57961e-53	MA0915.1	dve
MA1480.1	1.42618e-56	4.9978	0.972	0.368	2.3475e-53	MA1480.1	DPRX
MA0883.1	2.89645e-54	6.0012	1	0.352	4.76756e-51	MA0883.1	Dmbx1
MA0056.2	4.00912e-52	5.73751	0.944	0.376	6.59901e-49	MA0056.2	MZF1
MA0719.1	4.31846e-40	4.21243	0.972	0.422	7.10818e-37	MA0719.1	RHOXF1
MA0035.4	1.28859e-32	2.52819	0.958	0.436	2.12101e-29	MA0035.4	GATA1
MA1599.1	6.43054e-32	2.38107	0.887	0.462	1.05847e-28	MA1599.1	ZNF682
MA0053.1	7.81388e-29	1.18469	0.944	0.435	1.28616e-25	MA0053.1	MNB1A
MA0064.1	7.81388e-29	1.18469	0.944	0.435	1.28616e-25	MA0064.1	PBF
MA0285.1	4.81823e-27	2.02324	0.901	0.454	7.9308e-24	MA0285.1	CRZ1
MA0341.1	9.97634e-27	1.7779	0.887	0.453	1.64211e-23	MA0341.1	MSN2
MA0342.1	9.97634e-27	1.7779	0.887	0.453	1.64211e-23	MA0342.1	MSN4
MA0366.1	9.97634e-27	1.7779	0.887	0.453	1.64211e-23	MA0366.1	RGM1
MA1548.1	1.02534e-25	2.31364	0.93	0.469	1.68772e-22	MA1548.1	PLAGL2
MA0456.1	1.73872e-22	3.03926	0.915	0.469	2.86194e-19	MA0456.1	opa
MA0164.1	2.72928e-22	1.87397	0.831	0.433	4.4924e-19	MA0164.1	Nr2e3
MA0116.1	3.32795e-22	2.43766	0.817	0.444	5.4778e-19	MA0116.1	Znf423
MA0697.1	5.704e-22	3.33644	0.887	0.475	9.38878e-19	MA0697.1	ZIC3
MA0696.1	7.98564e-22	3.41351	0.915	0.477	1.31444e-18	MA0696.1	ZIC1
MA1410.1	1.01565e-20	2.15173	0.845	0.486	1.67175e-17	MA1410.1	StBRC1
MA0737.1	3.61423e-20	2.45187	0.887	0.464	5.94903e-17	MA0737.1	GLIS3
MA0711.1	3.81823e-20	4.38471	0.859	0.463	6.28481e-17	MA0711.1	OTX1
MA0751.1	4.12444e-20	3.76855	0.887	0.479	6.78883e-17	MA0751.1	ZIC4
MA0036.3	9.31149e-20	2.35769	0.817	0.437	1.53267e-16	MA0036.3	GATA2
MA0163.1	9.69347e-20	2.38294	0.831	0.466	1.59554e-16	MA0163.1	PLAG1
MA0372.1	1.46642e-19	1.77746	0.831	0.471	2.41372e-16	MA0372.1	RPH1
MA1584.1	2.25579e-19	2.54155	0.901	0.472	3.71303e-16	MA1584.1	ZIC5
MA0118.1	5.76642e-19	2.34409	0.831	0.466	9.49153e-16	MA0118.1	Macho-1
MA0307.1	6.9854e-19	1.40272	0.845	0.432	1.1498e-15	MA0307.1	GLN3
MA1430.1	8.75433e-19	1.88607	0.859	0.491	1.44096e-15	MA1430.1	TB1
MA0675.1	1.4441e-17	1.8894	0.845	0.444	2.37699e-14	MA0675.1	NKX6-2
MA0452.2	2.11815e-17	1.46625	0.873	0.448	3.48647e-14	MA0452.2	Kr
MA0306.1	2.26146e-17	1.67241	0.859	0.476	3.72236e-14	MA0306.1	GIS1
MA0027.2	4.36971e-17	2.63106	0.803	0.459	7.19255e-14	MA0027.2	EN1
MA0701.2	4.36971e-17	2.63106	0.803	0.459	7.19255e-14	MA0701.2	LHX9
MA0579.1	4.40667e-17	2.03254	0.887	0.468	7.25339e-14	MA0579.1	CDC5
MA1615.1	9.52326e-17	1.80185	0.887	0.482	1.56753e-13	MA1615.1	Plagl1
MA0923.1	1.32392e-16	3.53865	0.831	0.453	2.17917e-13	MA0923.1	lim-4
MA1031.1	1.81822e-16	1.79061	0.845	0.474	2.9928e-13	MA1031.1	OJ1581_H09.2
MA0436.1	2.07076e-16	1.57526	0.789	0.441	3.40846e-13	MA0436.1	YPR022C
MA0666.1	2.89923e-16	1.92943	0.831	0.46	4.77213e-13	MA0666.1	MSX1
MA0708.1	2.89923e-16	1.92943	0.831	0.46	4.77213e-13	MA0708.1	MSX2
MA0642.1	3.22924e-16	3.56387	0.775	0.46	5.31533e-13	MA0642.1	EN2
MA0130.1	3.26229e-16	1.67162	0.775	0.447	5.36973e-13	MA0130.1	ZNF354C
MA0984.1	3.39115e-16	2.27186	0.789	0.433	5.58183e-13	MA0984.1	DOF5.7
MA0184.1	6.97702e-16	0.656447	0.789	0.452	1.14842e-12	MA0184.1	CG9876
MA0198.1	6.97702e-16	0.656447	0.789	0.452	1.14842e-12	MA0198.1	OdsH
MA0200.1	6.97702e-16	0.656447	0.789	0.452	1.14842e-12	MA0200.1	Pph13
MA0209.1	6.97702e-16	0.656447	0.789	0.452	1.14842e-12	MA0209.1	ap
MA0228.1	6.97702e-16	0.656447	0.789	0.452	1.14842e-12	MA0228.1	ind
MA0241.1	6.97702e-16	0.656447	0.789	0.452	1.14842e-12	MA0241.1	ro
MA0618.1	9.97186e-16	2.47549	0.789	0.457	1.64137e-12	MA0618.1	LBX1
MA0654.1	9.97186e-16	2.47549	0.789	0.457	1.64137e-12	MA0654.1	ISX
MA0716.1	9.97186e-16	2.47549	0.789	0.457	1.64137e-12	MA0716.1	PRRX1
MA0717.1	9.97186e-16	2.47549	0.789	0.457	1.64137e-12	MA0717.1	RAX2
MA0720.1	9.97186e-16	2.47549	0.789	0.457	1.64137e-12	MA0720.1	Shox2
MA0882.1	9.97186e-16	2.47549	0.789	0.457	1.64137e-12	MA0882.1	DLX6
MA0927.1	9.97186e-16	2.47549	0.789	0.457	1.64137e-12	MA0927.1	vab-7
MA1577.1	9.97186e-16	2.47549	0.789	0.457	1.64137e-12	MA1577.1	TLX2
MA0075.3	9.97186e-16	2.47549	0.789	0.457	1.64137e-12	MA0075.3	PRRX2
MA0188.1	1.47846e-15	0.277594	0.803	0.453	2.43354e-12	MA0188.1	Dr
MA0699.1	1.62446e-15	1.72784	0.803	0.45	2.67386e-12	MA0699.1	LBX2
MA1654.1	4.40817e-15	1.78668	0.761	0.454	7.25584e-12	MA1654.1	ZNF16
MA0736.1	4.72793e-15	1.5235	0.887	0.457	7.78218e-12	MA0736.1	GLIS2
MA1399.1	6.22754e-15	1.4085	0.831	0.468	1.02505e-11	MA1399.1	At5g08520
MA0347.1	1.19506e-14	1.7683	0.803	0.47	1.96707e-11	MA0347.1	NRG1
MA1071.1	1.44737e-14	2.15266	0.732	0.43	2.38237e-11	MA1071.1	DOF5.3
MA0151.1	1.89525e-14	0.988056	0.944	0.471	3.11959e-11	MA0151.1	Arid3a
MA1629.1	2.19247e-14	1.77906	0.859	0.463	3.6088e-11	MA1629.1	Zic2
MA1578.1	2.85735e-14	1.9737	0.817	0.434	4.70319e-11	MA1578.1	VEZF1
MA0256.1	2.88193e-14	2.06518	0.789	0.467	4.74365e-11	MA0256.1	zen
MA1353.1	2.93608e-14	1.43029	0.775	0.459	4.83279e-11	MA1353.1	AT1G72740
MA0132.2	4.71335e-14	0.403775	0.817	0.469	7.75817e-11	MA0132.2	PDX1
MA0893.2	4.71335e-14	0.403775	0.817	0.469	7.75817e-11	MA0893.2	GSX2
MA1063.1	6.21696e-14	1.73487	0.873	0.458	1.02331e-10	MA1063.1	TCP19
MA0124.2	1.22722e-13	1.92752	0.845	0.461	2.02001e-10	MA0124.2	Nkx3-1
MA0889.1	1.80055e-13	2.06014	0.789	0.454	2.96371e-10	MA0889.1	GBX1
MA0886.1	2.20074e-13	1.5043	0.761	0.463	3.62241e-10	MA0886.1	EMX2
MA0482.2	2.57666e-13	1.35984	0.775	0.459	4.24119e-10	MA0482.2	GATA4
MA0710.1	3.55897e-13	1.79304	0.775	0.451	5.85807e-10	MA0710.1	NOTO
MA0146.2	3.72288e-13	1.11837	0.901	0.461	6.12786e-10	MA0146.2	Zfx
MA0793.1	1.08124e-12	2.05489	0.746	0.448	1.77972e-09	MA0793.1	POU6F2
MA0229.1	1.18606e-12	1.31406	0.831	0.488	1.95225e-09	MA0229.1	inv
MA0661.1	1.37984e-12	0.950129	0.732	0.452	2.27122e-09	MA0661.1	MEOX1
MA0264.1	1.468e-12	1.21256	0.817	0.463	2.41633e-09	MA0264.1	ceh-22
MA0876.1	1.72426e-12	1.52553	0.761	0.47	2.83813e-09	MA0876.1	BSX
MA0880.1	1.72426e-12	1.52553	0.761	0.47	2.83813e-09	MA0880.1	Dlx3
MA0881.1	2.74146e-12	1.42549	0.803	0.467	4.51245e-09	MA0881.1	Dlx4
MA0634.1	3.41092e-12	1.43754	0.789	0.463	5.61438e-09	MA0634.1	ALX3
MA1097.1	3.77536e-12	1.92633	0.746	0.463	6.21425e-09	MA1097.1	ARALYDRAFT_493022
MA0892.1	4.87575e-12	1.65534	0.817	0.485	8.02549e-09	MA0892.1	GSX1
MA1628.1	5.10936e-12	2.17953	0.803	0.481	8.41e-09	MA1628.1	Zic1::Zic2
MA0587.1	6.90103e-12	1.81019	0.761	0.475	1.13591e-08	MA0587.1	TCP16
MA0364.1	9.53181e-12	1.77362	0.746	0.47	1.56894e-08	MA0364.1	REI1
MA1288.1	1.22079e-11	1.35219	0.817	0.471	2.00943e-08	MA1288.1	At1g72010
MA1273.1	1.65893e-11	1.17704	0.775	0.438	2.7306e-08	MA1273.1	dof4.2
MA1549.1	2.3944e-11	1.37115	0.789	0.454	3.94118e-08	MA1549.1	POU6F1(var.2)
MA0180.1	3.07018e-11	1.21583	0.789	0.472	5.05351e-08	MA0180.1	Vsx2
MA0037.3	3.10342e-11	1.30656	0.789	0.44	5.10824e-08	MA0037.3	GATA3
MA1428.1	4.18907e-11	1.31214	0.789	0.475	6.89521e-08	MA1428.1	TCP8
MA1701.1	5.34121e-11	1.38111	0.746	0.452	8.79163e-08	MA1701.1	elt-2
MA1286.1	5.5385e-11	1.23778	0.718	0.476	9.11637e-08	MA1286.1	TCP24
MA1581.1	5.99384e-11	1.21166	0.789	0.483	9.86586e-08	MA1581.1	ZBTB6
MA0161.2	7.27069e-11	1.07525	0.732	0.428	1.19675e-07	MA0161.2	NFIC
MA0368.1	7.69257e-11	1.15609	0.718	0.428	1.2662e-07	MA0368.1	RIM101
MA0766.2	1.63e-10	0.948025	0.789	0.447	2.68298e-07	MA0766.2	GATA5
MA0020.1	1.85376e-10	0.934667	0.732	0.422	3.0513e-07	MA0020.1	Dof2
MA0894.1	1.8578e-10	1.52841	0.761	0.469	3.05794e-07	MA0894.1	HESX1
MA1398.2	1.99925e-10	1.64159	0.718	0.479	3.29076e-07	MA1398.2	KUA1
MA0928.1	2.02593e-10	1.40964	0.761	0.473	3.33469e-07	MA0928.1	zfh-2
MA1019.1	2.06019e-10	1.69501	0.732	0.465	3.39108e-07	MA1019.1	Glyma19g26560.1
MA1355.1	2.12153e-10	1.12008	0.775	0.487	3.49204e-07	MA1355.1	TBP3
MA0890.1	3.37263e-10	1.27952	0.704	0.463	5.55135e-07	MA0890.1	GBX2
MA0339.1	3.53287e-10	1.30655	0.732	0.454	5.81511e-07	MA0339.1	MIG3
MA0304.1	4.83436e-10	1.01639	0.746	0.449	7.95735e-07	MA0304.1	GCR1
MA0914.1	4.98582e-10	1.07754	0.761	0.454	8.20666e-07	MA0914.1	ISL2
MA0105.4	7.17947e-10	1.55793	0.761	0.463	1.18174e-06	MA0105.4	NFKB1
MA0704.1	8.49582e-10	1.26393	0.775	0.46	1.39841e-06	MA0704.1	Lhx4
MA0268.1	1.29889e-09	0.994344	0.732	0.469	2.13797e-06	MA0268.1	ADR1
MA1281.1	1.57006e-09	1.38416	0.704	0.457	2.58432e-06	MA1281.1	AT5G02460
MA0671.1	1.63469e-09	1.02603	0.761	0.473	2.69071e-06	MA0671.1	NFIX
MA1274.1	1.68704e-09	1.2698	0.69	0.456	2.77686e-06	MA1274.1	OBP3
MA0413.1	1.99601e-09	0.777448	0.831	0.476	3.28543e-06	MA0413.1	USV1
MA0559.1	2.09326e-09	1.69979	0.676	0.413	3.44551e-06	MA0559.1	PI
MA0300.1	2.32286e-09	1.00455	0.789	0.466	3.82342e-06	MA0300.1	GAT1
MA0468.1	2.77001e-09	0.954234	0.789	0.484	4.55943e-06	MA0468.1	DUX4
MA1282.1	3.03409e-09	0.902061	0.775	0.486	4.9941e-06	MA1282.1	PTF1
MA1432.1	4.04112e-09	1.03098	0.704	0.442	6.65169e-06	MA1432.1	cre-1
MA1050.1	8.26146e-09	1.57687	0.732	0.475	1.35984e-05	MA1050.1	OsI_08196
MA0884.1	9.45764e-09	0.884622	0.803	0.483	1.55673e-05	MA0884.1	DUXA
MA0441.1	1.11019e-08	1.43052	0.746	0.471	1.82737e-05	MA0441.1	ZMS1
MA0674.1	1.11099e-08	0.518203	0.746	0.476	1.82869e-05	MA0674.1	NKX6-1
MA0722.1	1.11099e-08	0.518203	0.746	0.476	1.82869e-05	MA0722.1	VAX1
MA0723.1	1.11099e-08	0.518203	0.746	0.476	1.82869e-05	MA0723.1	VAX2
MA1481.1	1.11099e-08	0.518203	0.746	0.476	1.82869e-05	MA1481.1	DRGX
MA1500.1	1.11099e-08	0.518203	0.746	0.476	1.82869e-05	MA1500.1	HOXB6
MA1519.1	1.11099e-08	0.518203	0.746	0.476	1.82869e-05	MA1519.1	LHX5
MA0709.1	1.21818e-08	1.14398	0.761	0.463	2.00512e-05	MA0709.1	Msx3
MA1463.1	1.34714e-08	1.05749	0.803	0.481	2.21739e-05	MA1463.1	ARGFX
MA1656.1	1.72019e-08	1.25867	0.718	0.454	2.83144e-05	MA1656.1	ZNF449
MA1067.1	2.0544e-08	0.978875	0.761	0.482	3.38154e-05	MA1067.1	TCP5
MA1643.1	2.76582e-08	1.33751	0.718	0.462	4.55254e-05	MA1643.1	NFIB
MA1290.1	3.22924e-08	1.11881	0.718	0.492	5.31533e-05	MA1290.1	TCP17
MA0211.1	3.63087e-08	0.842878	0.789	0.479	5.97642e-05	MA0211.1	bap
MA0537.1	3.69125e-08	1.04182	0.718	0.425	6.0758e-05	MA0537.1	blmp-1
MA1326.1	3.79742e-08	0.844869	0.761	0.484	6.25056e-05	MA1326.1	ZHD5
MA0658.1	3.80648e-08	0.839968	0.718	0.46	6.26546e-05	MA0658.1	LHX6
MA0769.2	3.91277e-08	0.602361	0.789	0.485	6.44042e-05	MA0769.2	TCF7
MA1397.1	4.94168e-08	1.49645	0.69	0.473	8.13401e-05	MA1397.1	At1g74840
MA0460.1	6.10451e-08	1.18432	0.718	0.487	0.00010048	MA0460.1	ttk
MA0523.1	6.1096e-08	1.24954	0.732	0.466	0.000100564	MA0523.1	TCF7L2
MA0144.2	7.96367e-08	1.28422	0.704	0.432	0.000131082	MA0144.2	STAT3
MA1287.1	9.00333e-08	1.11468	0.761	0.483	0.000148195	MA1287.1	TCP21
MA0702.2	1.02152e-07	0.961215	0.732	0.468	0.000168143	MA0702.2	LMX1A
MA0768.1	1.33188e-07	1.11023	0.662	0.467	0.000219227	MA0768.1	LEF1
MA1064.1	1.37494e-07	0.936505	0.718	0.492	0.000226314	MA1064.1	TCP2
MA0670.1	1.42426e-07	1.19912	0.69	0.445	0.000234433	MA0670.1	NFIA
MA0319.1	1.50047e-07	1.25744	0.718	0.467	0.000246978	MA0319.1	HSF1
MA1284.1	2.28212e-07	1.07004	0.704	0.469	0.000375638	MA1284.1	TCP1
MA0168.1	2.82143e-07	0.464065	0.746	0.474	0.000464407	MA0168.1	B-H1
MA0169.1	2.82143e-07	0.464065	0.746	0.474	0.000464407	MA0169.1	B-H2
MA0171.1	2.82143e-07	0.464065	0.746	0.474	0.000464407	MA0171.1	CG11085
MA0175.1	2.82143e-07	0.464065	0.746	0.474	0.000464407	MA0175.1	lms
MA0192.1	2.82143e-07	0.464065	0.746	0.474	0.000464407	MA0192.1	Hmx
MA0196.1	2.82143e-07	0.464065	0.746	0.474	0.000464407	MA0196.1	NK7.1
MA0248.1	2.82143e-07	0.464065	0.746	0.474	0.000464407	MA0248.1	tup
MA0250.1	2.82143e-07	0.464065	0.746	0.474	0.000464407	MA0250.1	unc-4
MA0444.1	2.82143e-07	0.464065	0.746	0.474	0.000464407	MA0444.1	CG34031
MA1354.1	2.99869e-07	1.13919	0.69	0.466	0.000493584	MA1354.1	AT4G12670
MA1065.2	3.03592e-07	1.22771	0.676	0.472	0.000499712	MA1065.2	TCP20
MA1117.1	3.23502e-07	0.79031	0.746	0.444	0.000532485	MA1117.1	RELB
MA1270.1	3.30071e-07	1.00544	0.648	0.441	0.000543297	MA1270.1	AT3G45610
MA1352.1	3.64657e-07	0.610614	0.775	0.475	0.000600226	MA1352.1	TRP1
MA0542.1	4.39022e-07	1.21047	0.746	0.478	0.000722631	MA0542.1	elt-3
MA1066.1	6.58964e-07	1.04219	0.718	0.483	0.00108465	MA1066.1	TCP23
MA0332.1	7.20085e-07	0.851228	0.718	0.461	0.00118526	MA0332.1	MET28
MA0068.2	7.58257e-07	0.684731	0.704	0.46	0.00124809	MA0068.2	PAX4
MA0705.1	7.58257e-07	0.684731	0.704	0.46	0.00124809	MA0705.1	Lhx8
MA1597.1	7.74699e-07	1.01897	0.69	0.458	0.00127515	MA1597.1	ZNF528
MA1154.1	8.31999e-07	1.15519	0.62	0.447	0.00136947	MA1154.1	ZNF282
MA1433.1	9.04767e-07	0.885774	0.746	0.486	0.00148925	MA1433.1	msn-1
MA0290.1	9.24897e-07	1.24706	0.704	0.466	0.00152238	MA0290.1	DAL81
MA0092.1	9.4356e-07	1.37731	0.718	0.44	0.0015531	MA0092.1	Hand1::Tcf3
MA1278.1	1.06115e-06	0.978791	0.662	0.446	0.00174665	MA1278.1	OBP1
MA0735.1	1.10217e-06	0.917471	0.718	0.462	0.00181417	MA0735.1	GLIS1
MA0713.1	1.11863e-06	0.567529	0.761	0.483	0.00184126	MA0713.1	PHOX2A
MA1518.1	1.19753e-06	2.01156	0.676	0.46	0.00197113	MA1518.1	LHX1
MA0425.1	1.22419e-06	1.10368	0.662	0.454	0.00201502	MA0425.1	YGR067C
MA1054.1	1.3242e-06	0.907314	0.761	0.483	0.00217963	MA1054.1	ARALYDRAFT_897773
MA1271.1	1.55805e-06	1.05341	0.718	0.47	0.00256455	MA1271.1	DAG2
MA0358.1	1.63552e-06	0.790512	0.746	0.478	0.00269207	MA0358.1	PUT3
MA0700.2	1.76039e-06	0.874141	0.718	0.476	0.00289761	MA0700.2	LHX2
MA1116.1	1.96061e-06	0.620216	0.704	0.443	0.00322717	MA1116.1	RBPJ
MA1186.1	2.74385e-06	1.24966	0.746	0.483	0.00451637	MA1186.1	At1g49010
MA0403.1	3.658e-06	0.952518	0.704	0.467	0.00602106	MA0403.1	TBF1
MA0247.2	6.35731e-06	0.777206	0.676	0.457	0.0104641	MA0247.2	tin
MA1686.1	7.95289e-06	0.590181	0.732	0.473	0.0130905	MA1686.1	ARF13
MA1385.1	7.99284e-06	1.08418	0.648	0.473	0.0131562	MA1385.1	AT2G40260
MA1589.1	8.03682e-06	0.744024	0.634	0.451	0.0132286	MA1589.1	ZNF140
MA1164.1	8.03925e-06	0.602589	0.732	0.463	0.0132326	MA1164.1	HHO5
MA0155.1	8.31121e-06	0.573497	0.704	0.47	0.0136803	MA0155.1	INSM1
MA1439.1	8.45802e-06	1.08319	0.676	0.462	0.0139219	MA1439.1	elt-6
MA1272.1	8.46186e-06	1.0487	0.648	0.476	0.0139282	MA1272.1	AT2G28810
MA0331.1	8.66686e-06	1.31327	0.634	0.46	0.0142656	MA0331.1	MCM1
MA0662.1	1.07777e-05	0.742685	0.69	0.483	0.0177401	MA0662.1	MIXL1
MA1096.1	1.18457e-05	0.922078	0.62	0.492	0.0194981	MA1096.1	ARALYDRAFT_496250
MA0853.1	1.18841e-05	0.651355	0.648	0.461	0.0195612	MA0853.1	Alx4
MA0672.1	1.34616e-05	0.792692	0.718	0.483	0.0221578	MA0672.1	NKX2-3
MA0423.1	1.44754e-05	1.03998	0.606	0.442	0.0238266	MA0423.1	YER130C
MA0218.1	1.87647e-05	0.260671	0.746	0.468	0.0308867	MA0218.1	ct
MA1279.1	1.96505e-05	0.856994	0.634	0.456	0.0323447	MA1279.1	COG1
MA0051.1	2.00143e-05	0.627911	0.704	0.438	0.0329435	MA0051.1	IRF2
MA0308.1	2.02742e-05	0.95311	0.62	0.46	0.0333713	MA0308.1	GSM1
MA1147.1	2.60685e-05	0.972219	0.62	0.488	0.0429088	MA1147.1	NR4A2::RXRA
MA0431.1	2.64729e-05	0.737558	0.718	0.468	0.0435744	MA0431.1	TDA9
MA1690.1	3.4446e-05	0.735901	0.662	0.464	0.0566981	MA1690.1	ARF25
MA1285.1	3.70255e-05	1.00874	0.662	0.478	0.060944	MA1285.1	At2g45680
MA0854.1	4.05453e-05	0.565694	0.69	0.465	0.0667375	MA0854.1	Alx1
MA0370.1	4.35402e-05	1.10527	0.634	0.429	0.0716672	MA0370.1	RME1
MA0874.1	4.43842e-05	0.765811	0.676	0.502	0.0730563	MA0874.1	Arx
MA1035.1	4.4587e-05	0.724925	0.704	0.486	0.0733902	MA1035.1	TCP4
MA0183.1	4.58467e-05	0.3756	0.69	0.488	0.0754636	MA0183.1	HHEX
MA1587.1	5.02136e-05	1.043	0.69	0.479	0.0826516	MA1587.1	ZNF135
MA0715.1	5.47094e-05	0.657072	0.69	0.493	0.0900517	MA0715.1	PROP1
MA1695.1	5.49238e-05	0.719809	0.704	0.463	0.0904046	MA1695.1	ARF36
MA0263.1	5.53149e-05	0.421957	0.704	0.49	0.0910483	MA0263.1	ceh-10::ttx-3
MA1528.1	5.85765e-05	1.01892	0.662	0.467	0.0964169	MA1528.1	NFIX(var.2)
MA0574.1	5.95297e-05	0.452803	0.704	0.484	0.0979859	MA0574.1	MYB15
MA0396.1	6.06229e-05	0.479714	0.676	0.485	0.0997853	MA0396.1	STP3
MA0205.2	6.1938e-05	0.419805	0.662	0.452	0.10195	MA0205.2	Trl
MA1441.1	7.05003e-05	0.676746	0.648	0.486	0.116043	MA1441.1	lim-7
MA1189.1	7.45161e-05	0.481582	0.718	0.478	0.122653	MA1189.1	AT5G61620
MA0590.1	7.72194e-05	0.810838	0.648	0.474	0.127103	MA0590.1	LFY
MA1062.2	8.19e-05	0.817529	0.648	0.471	0.134807	MA1062.2	TCP15
MA1289.1	8.75177e-05	0.725124	0.648	0.481	0.144054	MA1289.1	TCP3
MA0088.2	8.95211e-05	0.471835	0.732	0.461	0.147352	MA0088.2	ZNF143
MA1276.1	8.99479e-05	0.973099	0.577	0.467	0.148054	MA1276.1	AT3G52440
MA0149.1	9.46746e-05	1.06955	0.648	0.423	0.155834	MA0149.1	EWSR1-FLI1
MA0684.2	9.54591e-05	0.693716	0.606	0.445	0.157126	MA0684.2	RUNX3
MA0688.1	0.00010171	0.420165	0.662	0.461	0.167414	MA0688.1	TBX2
MA0066.1	0.000115401	1.01298	0.676	0.454	0.18995	MA0066.1	PPARG
MA0503.1	0.000148592	0.608184	0.676	0.454	0.244583	MA0503.1	Nkx2-5(var.2)
MA0094.2	0.000155574	0.35262	0.718	0.488	0.256075	MA0094.2	Ubx
MA0277.1	0.000175973	1.03131	0.577	0.444	0.289652	MA0277.1	AZF1
MA1277.1	0.00017836	0.863427	0.606	0.451	0.293581	MA1277.1	Adof1
MA0309.1	0.000187919	0.81045	0.648	0.472	0.309314	MA0309.1	GZF3
MA0049.1	0.000203	0.596091	0.634	0.436	0.334138	MA0049.1	hb
MA1268.1	0.000218735	0.616221	0.648	0.457	0.360039	MA1268.1	AT1G69570
MA1095.1	0.000227583	0.770041	0.62	0.483	0.374602	MA1095.1	ARALYDRAFT_495258
MA1098.1	0.000227583	0.770041	0.62	0.483	0.374602	MA1098.1	ARALYDRAFT_484486
MA0125.1	0.000268886	1.17009	0.648	0.475	0.442586	MA0125.1	Nobox
MA0242.1	0.000281324	0.560188	0.648	0.475	0.46306	MA0242.1	Bgb::run
MA0479.1	0.0002965	0.286406	0.704	0.47	0.488039	MA0479.1	FOXH1
MA0680.1	0.000386006	0.92846	0.761	0.486	0.635366	MA0680.1	PAX7
MA0119.1	0.000460651	1.00124	0.606	0.466	0.758232	MA0119.1	NFIC::TLX1
MA1608.1	0.000516812	0.825762	0.676	0.472	0.850672	MA1608.1	Isl1
MA0518.1	0.000533095	0.754759	0.535	0.428	0.877475	MA0518.1	Stat4
MA0120.1	0.00053503	1.72171	0.493	0.427	0.880659	MA0120.1	id1
MA1527.1	0.000583951	0.603464	0.62	0.458	0.961184	MA1527.1	NFIC(var.2)
MA1267.1	0.000645289	0.588804	0.549	0.472	1	MA1267.1	AT5G66940
MA0417.1	0.000780339	0.63732	0.62	0.446	1	MA0417.1	YAP5
MA0644.1	0.000785642	0.514023	0.662	0.476	1	MA0644.1	ESX1
MA1404.1	0.000800786	0.56718	0.62	0.454	1	MA1404.1	BPC1
MA0337.1	0.000840561	0.320085	0.662	0.486	1	MA0337.1	MIG1
MA0983.1	0.000853869	0.579874	0.662	0.462	1	MA0983.1	DOF5.6
MA0021.1	0.000857689	0.474908	0.549	0.428	1	MA0021.1	Dof3
MA0673.1	0.000871294	0.409029	0.634	0.486	1	MA0673.1	NKX2-8
MA1491.1	0.00101403	0.681765	0.662	0.476	1	MA1491.1	GLI3
MA1530.1	0.00107563	0.499892	0.577	0.47	1	MA1530.1	NKX6-3
MA0111.1	0.00113781	0.341258	0.746	0.462	1	MA0111.1	Spz1
MA0932.1	0.00124986	0.479813	0.718	0.486	1	MA0932.1	AHL12
MA0934.1	0.00124986	0.479813	0.718	0.486	1	MA0934.1	AHL25
MA1280.1	0.00129216	0.722075	0.577	0.463	1	MA1280.1	OBP4
MA1421.1	0.00134662	0.686041	0.563	0.474	1	MA1421.1	TCF7L1
MA1531.1	0.00145	0.486508	0.662	0.487	1	MA1531.1	NR1D1
MA1125.1	0.00147129	0.675074	0.606	0.451	1	MA1125.1	ZNF384
MA0050.2	0.00180531	0.484181	0.592	0.453	1	MA0050.2	IRF1
MA1657.1	0.00184043	0.453479	0.563	0.479	1	MA1657.1	ZNF652
MA1408.1	0.00213829	0.385584	0.648	0.483	1	MA1408.1	FaEOBII
MA0508.3	0.0021601	0.278958	0.549	0.426	1	MA0508.3	PRDM1
MA0589.1	0.00218135	0.630128	0.592	0.475	1	MA0589.1	ZAP1
MA0407.1	0.0022842	0.555736	0.521	0.444	1	MA0407.1	THI2
MA0621.1	0.00240421	0.333073	0.69	0.491	1	MA0621.1	mix-a
MA0389.1	0.00242193	0.820707	0.69	0.495	1	MA0389.1	SRD1
MA0293.1	0.00272054	0.398752	0.634	0.469	1	MA0293.1	ECM23
MA1356.1	0.00320063	0.362755	0.648	0.485	1	MA1356.1	TRP2
MA0576.1	0.00332912	0.53979	0.62	0.479	1	MA0576.1	RAX3
MA0323.1	0.00347619	0.533723	0.592	0.446	1	MA0323.1	IXR1
MA1104.2	0.00351668	0.32218	0.648	0.465	1	MA1104.2	GATA6
MA1413.1	0.0041909	0.510265	0.662	0.473	1	MA1413.1	UIF1
MA0540.1	0.00446114	0.495877	0.577	0.457	1	MA0540.1	dpy-27
MA0734.2	0.00466978	0.408816	0.634	0.47	1	MA0734.2	GLI2
MA0140.2	0.005029	0.430485	0.592	0.486	1	MA0140.2	GATA1::TAL1
MA1522.1	0.00508222	0.684205	0.606	0.475	1	MA1522.1	MAZ
MA0753.2	0.00539364	0.395428	0.606	0.46	1	MA0753.2	ZNF740
MA0758.1	0.00560833	0.954879	0.563	0.457	1	MA0758.1	E2F7
MA0794.1	0.00576281	0.367649	0.676	0.481	1	MA0794.1	PROX1
MA1200.1	0.00584719	0.536162	0.634	0.46	1	MA1200.1	AGL25
MA0919.1	0.00591504	0.274744	0.662	0.491	1	MA0919.1	dsc-1
MA0253.1	0.0060707	0.43105	0.662	0.467	1	MA0253.1	vnd
MA0989.1	0.00617778	0.670451	0.563	0.464	1	MA0989.1	PHYPADRAFT_153324
MA0137.3	0.00688301	0.748821	0.493	0.433	1	MA0137.3	STAT1
MA0276.1	0.0084951	0.506044	0.592	0.486	1	MA0276.1	ASH1
MA1194.1	0.00885692	0.365517	0.662	0.486	1	MA1194.1	AT3G10580
MA0440.1	0.00910429	0.402624	0.577	0.492	1	MA0440.1	ZAP1
MA0778.1	0.00938713	0.363099	0.563	0.465	1	MA0778.1	NFKB2
MA1383.1	0.00943366	0.410621	0.577	0.496	1	MA1383.1	KAN2
MA0780.1	0.00999817	0.3623	0.676	0.487	1	MA0780.1	PAX3
MA1667.1	0.0109422	0.35794	0.592	0.437	1	MA1667.1	HSFC1
MA1624.1	0.0112721	0.531789	0.535	0.439	1	MA1624.1	Stat5a
MA1388.1	0.0119447	0.309068	0.634	0.469	1	MA1388.1	AT3G24120
MA0519.1	0.0122438	0.674301	0.563	0.438	1	MA0519.1	Stat5a::Stat5b
MA1006.1	0.0124126	0.299323	0.676	0.483	1	MA1006.1	ERF6
MA0725.1	0.0129562	0.269879	0.606	0.481	1	MA0725.1	VSX1
MA0726.1	0.0129562	0.269879	0.606	0.481	1	MA0726.1	VSX2
MA1293.1	0.0138144	0.422906	0.577	0.482	1	MA1293.1	MYB57
MA0080.5	0.0139678	0.451387	0.592	0.437	1	MA0080.5	SPI1
MA1681.1	0.0154379	0.407702	0.549	0.477	1	MA1681.1	SRM1
MA0269.1	0.0154686	0.355006	0.634	0.476	1	MA0269.1	AFT1
MA0322.1	0.0173578	0.331405	0.676	0.454	1	MA0322.1	INO4
MA1688.1	0.018069	0.262927	0.662	0.461	1	MA1688.1	ARF16
MA0335.1	0.0186934	0.353193	0.577	0.457	1	MA0335.1	MET4
MA1357.1	0.0192336	0.552583	0.563	0.473	1	MA1357.1	bHLH80
MA1575.1	0.0192493	0.550469	0.648	0.489	1	MA1575.1	THRB(var.2)
MA1663.1	0.0203506	0.253411	0.577	0.478	1	MA1663.1	ANAC050
MA1146.1	0.0207348	0.433444	0.577	0.492	1	MA1146.1	NR1H4::RXRA
MA1075.1	0.0209431	0.626054	0.606	0.461	1	MA1075.1	WRKY12
MA1084.1	0.0209431	0.626054	0.606	0.461	1	MA1084.1	WRKY38
MA1700.1	0.0214209	0.358076	0.563	0.465	1	MA1700.1	Clamp
MA1358.1	0.021853	0.603193	0.549	0.473	1	MA1358.1	bHLH130
MA0687.1	0.0220203	0.511573	0.535	0.456	1	MA0687.1	SPIC
MA0301.1	0.0265394	0.458902	0.592	0.488	1	MA0301.1	GAT3
MA0435.1	0.0281426	0.270722	0.592	0.493	1	MA0435.1	YPR015C
MA0101.1	0.0331065	0.522854	0.563	0.465	1	MA0101.1	REL
MA1696.1	0.0341584	0.287947	0.549	0.469	1	MA1696.1	ARF39
MA0321.1	0.0394438	0.269308	0.549	0.448	1	MA0321.1	INO2
MA0390.1	0.0424416	0.458228	0.563	0.476	1	MA0390.1	STB3
MA0350.1	0.0424487	0.823065	0.549	0.473	1	MA0350.1	TOD6
MA0305.1	0.0427049	0.288026	0.606	0.451	1	MA0305.1	GCR2
MA1039.1	0.0455589	0.454188	0.521	0.499	1	MA1039.1	MYB4
MA1291.1	0.046373	0.394274	0.606	0.489	1	MA1291.1	TCP7
MA0703.2	0.0477686	0.27086	0.563	0.513	1	MA0703.2	LMX1B
MA1664.1	0.0484704	0.407552	0.535	0.456	1	MA1664.1	HSFA6B
MA0328.2	0.049507	0.274146	0.563	0.469	1	MA0328.2	MATALPHA2
MA1665.1	0.0558839	0.705782	0.521	0.452	1	MA1665.1	HSFB2A
MA0302.1	0.0575565	0.26586	0.563	0.477	1	MA0302.1	GAT4
MA1431.1	0.0681471	0.57522	0.563	0.484	1	MA1431.1	rst2
MA1294.1	0.0714222	0.267577	0.535	0.477	1	MA1294.1	MYB62
MA0532.1	0.0742759	0.347279	0.507	0.438	1	MA0532.1	Stat92E
MA0122.3	0.0782611	0.30738	0.535	0.479	1	MA0122.3	Nkx3-2
MA0258.2	0.0832198	0.54195	0.521	0.472	1	MA0258.2	ESR2
MA0520.1	0.0848445	0.330617	0.549	0.454	1	MA0520.1	Stat6
MA1013.1	0.0858242	0.321801	0.493	0.484	1	MA1013.1	GATA10
MA1015.1	0.0858242	0.321801	0.493	0.484	1	MA1015.1	GATA12
MA1532.1	0.08702	0.533391	0.563	0.482	1	MA1532.1	NR1D2
MA1014.1	0.0891336	0.270292	0.549	0.48	1	MA1014.1	GATA11
MA1381.1	0.0955297	0.250516	0.563	0.466	1	MA1381.1	AT3G46070
MA0895.1	0.11933	0.885522	0.549	0.484	1	MA0895.1	HMBOX1
MA0274.1	0.120334	0.335498	0.451	0.483	1	MA0274.1	ARR1
MA0973.1	0.126151	0.696403	0.493	0.46	1	MA0973.1	CDF2
MA1417.1	0.128838	0.263377	0.549	0.475	1	MA1417.1	O2
MA1150.1	0.132417	0.359084	0.577	0.477	1	MA1150.1	RORB
MA0022.1	0.145519	0.326145	0.324	0.469	1	MA0022.1	dl
MA0865.1	0.150011	0.858692	0.493	0.466	1	MA0865.1	E2F8
MA1292.1	0.152413	0.410749	0.437	0.499	1	MA1292.1	MYB27
MA1538.1	0.171573	0.254398	0.549	0.491	1	MA1538.1	NR2F1(var.3)
MA1083.1	0.180822	0.305354	0.507	0.454	1	MA1083.1	WRKY30
MA0282.1	0.225539	0.402979	0.563	0.457	1	MA0282.1	CEP3
MA0152.1	0.249822	0.361952	0.521	0.445	1	MA0152.1	NFATC2
MA0486.2	0.266165	0.324748	0.549	0.441	1	MA0486.2	HSF1
MA0422.1	0.3261	0.270792	0.521	0.489	1	MA0422.1	URC2
MA0351.1	0.345015	0.272197	0.507	0.464	1	MA0351.1	DOT6
MA0336.1	0.356453	0.550471	0.521	0.481	1	MA0336.1	MGA1
MA0069.1	0.373746	0.484957	0.479	0.456	1	MA0069.1	PAX6
MA1324.1	0.394061	0.287142	0.507	0.466	1	MA1324.1	GATA20
MA0739.1	0.395862	0.628392	0.563	0.457	1	MA0739.1	Hic1
MA0505.1	0.397507	0.551313	0.479	0.487	1	MA0505.1	Nr5a2
MA0606.1	0.405638	0.342159	0.507	0.459	1	MA0606.1	NFAT5
MA1476.1	0.418418	0.298095	0.493	0.473	1	MA1476.1	DLX5
MA0400.1	0.421226	1.07781	0.521	0.473	1	MA0400.1	SUT2
MA1666.1	0.423792	0.397952	0.465	0.446	1	MA1666.1	HSFB2B
MA0397.1	0.424505	0.38998	0.563	0.489	1	MA0397.1	STP4
MA0287.1	0.425466	0.341533	0.465	0.443	1	MA0287.1	CUP2
MA1283.1	0.48872	0.261456	0.563	0.488	1	MA1283.1	TCP14
MA1325.1	0.512457	0.6371	0.465	0.475	1	MA1325.1	GATA14
MA1037.1	0.556543	0.382048	0.451	0.491	1	MA1037.1	MYB24
MA1555.1	0.562435	0.331455	0.465	0.506	1	MA1555.1	RXRB(var.2)
MA1343.1	0.609854	1.30231	0.437	0.47	1	MA1343.1	bZIP52
MA1199.1	0.615092	0.455628	0.493	0.471	1	MA1199.1	AGL16
MA0548.2	0.689578	0.293183	0.437	0.475	1	MA0548.2	AGL15
MA1458.1	0.819434	0.281995	0.437	0.456	1	MA1458.1	Hsf
MA1203.1	0.968441	0.357572	0.423	0.463	1	MA1203.1	AGL63

## Sheet: 10 MB.3
	p_val	avg_log2FC	pct.1	pct.2	p_val_adj	motif	motif.name
MA0682.2	1.62233e-15	0.568866	0.975	0.308	2.67035e-12	MA0682.2	PITX1
MA0714.1	2.0578e-15	0.339461	0.95	0.327	3.38713e-12	MA0714.1	PITX3
MA1480.1	2.74381e-14	0.797786	0.95	0.376	4.51632e-11	MA1480.1	DPRX
MA0883.1	3.08983e-14	0.479897	1	0.36	5.08586e-11	MA0883.1	Dmbx1
MA1547.1	7.39735e-14	0.628625	0.9	0.342	1.2176e-10	MA1547.1	PITX2
MA0719.1	1.52583e-13	0.922115	0.925	0.431	2.51151e-10	MA0719.1	RHOXF1
MA0326.1	1.44725e-10	1.00217	0.9	0.462	2.38217e-07	MA0326.1	MAC1
MA0056.2	1.77714e-10	0.455036	0.9	0.384	2.92518e-07	MA0056.2	MZF1
MA0711.1	1.51097e-09	0.993224	0.875	0.468	2.48706e-06	MA0711.1	OTX1
MA0073.1	2.51776e-09	0.314756	0.9	0.46	4.14424e-06	MA0073.1	RREB1
MA0482.2	1.33753e-07	2.02208	0.8	0.463	0.000220157	MA0482.2	GATA4
MA0036.3	1.3964e-07	1.96548	0.8	0.442	0.000229847	MA0036.3	GATA2
MA1399.1	1.84003e-07	1.31871	0.75	0.474	0.000302869	MA1399.1	At5g08520
MA1599.1	3.94937e-07	1.12306	0.825	0.468	0.000650066	MA1599.1	ZNF682
MA0085.1	1.0081e-06	1.16639	0.725	0.443	0.00165933	MA0085.1	Su(H)
MA0766.2	1.12057e-06	1.26506	0.65	0.454	0.00184446	MA0766.2	GATA5
MA0035.4	2.37842e-06	1.14753	0.775	0.446	0.00391488	MA0035.4	GATA1
MA0218.1	4.39479e-06	0.444394	0.85	0.47	0.00723383	MA0218.1	ct
MA0863.1	4.66556e-06	0.856881	0.8	0.479	0.0076795	MA0863.1	MTF1
MA0053.1	6.21688e-06	0.55513	0.725	0.445	0.010233	MA0053.1	MNB1A
MA0064.1	6.21688e-06	0.55513	0.725	0.445	0.010233	MA0064.1	PBF
MA1354.1	1.07141e-05	0.994603	0.75	0.468	0.0176354	MA1354.1	AT4G12670
MA0092.1	1.09143e-05	1.12306	0.7	0.444	0.017965	MA0092.1	Hand1::Tcf3
MA0233.1	1.21558e-05	0.40247	0.75	0.453	0.0200085	MA0233.1	mirr
MA0537.1	1.23902e-05	1.15035	0.675	0.43	0.0203943	MA0537.1	blmp-1
MA0479.1	1.36735e-05	0.765431	0.75	0.472	0.0225065	MA0479.1	FOXH1
MA0452.2	1.78985e-05	1.01457	0.725	0.457	0.029461	MA0452.2	Kr
MA0520.1	3.12359e-05	0.687914	0.75	0.451	0.0514143	MA0520.1	Stat6
MA0348.1	3.15324e-05	1.49679	0.775	0.482	0.0519023	MA0348.1	OAF1
MA0161.2	7.06369e-05	1.37277	0.65	0.433	0.116268	MA0161.2	NFIC
MA1581.1	7.72545e-05	0.927087	0.775	0.487	0.127161	MA1581.1	ZBTB6
MA1681.1	8.41637e-05	0.622044	0.775	0.474	0.138533	MA1681.1	SRM1
MA0121.1	0.000103389	1.05958	0.75	0.475	0.170178	MA0121.1	ARR10
MA1415.1	0.000119406	0.806403	0.7	0.448	0.196542	MA1415.1	REF6
MA0368.1	0.00012219	1.27556	0.65	0.433	0.201124	MA0368.1	RIM101
MA0508.3	0.000127448	1.24457	0.6	0.427	0.209779	MA0508.3	PRDM1
MA0939.1	0.000129129	1.35359	0.75	0.479	0.212546	MA0939.1	NAC080
MA0205.2	0.000171962	0.353483	0.725	0.454	0.28305	MA0205.2	Trl
MA0037.3	0.000173249	1.05795	0.625	0.447	0.285167	MA0037.3	GATA3
MA0290.1	0.000175299	0.772918	0.7	0.469	0.288542	MA0290.1	DAL81
MA0130.1	0.000192711	0.423162	0.825	0.45	0.317203	MA0130.1	ZNF354C
MA1491.1	0.000218847	0.657428	0.75	0.477	0.360223	MA1491.1	GLI3
MA1044.1	0.000264502	0.7374	0.675	0.457	0.43537	MA1044.1	NAC92
MA0307.1	0.000314336	0.327057	0.725	0.439	0.517398	MA0307.1	GLN3
MA1700.1	0.000346653	1.08668	0.65	0.465	0.57059	MA1700.1	Clamp
MA0312.1	0.000355296	0.611659	0.8	0.488	0.584817	MA0312.1	HAP1
MA1630.1	0.000358673	1.20743	0.675	0.451	0.590375	MA1630.1	Znf281
MA1693.1	0.000360797	0.579519	0.675	0.464	0.593872	MA1693.1	ARF34
MA0418.1	0.000548798	0.441975	0.75	0.468	0.903322	MA0418.1	YAP6
MA1402.1	0.000592487	0.477114	0.725	0.46	0.975234	MA1402.1	BPC6
MA0415.1	0.00060111	0.664099	0.65	0.478	0.989427	MA0415.1	YAP1
MA1688.1	0.000665152	0.667379	0.725	0.463	1	MA1688.1	ARF16
MA0582.1	0.000768733	0.893423	0.675	0.467	1	MA0582.1	RAV1
MA0460.1	0.000887855	0.861865	0.725	0.49	1	MA0460.1	ttk
MA0164.1	0.000944026	0.981163	0.65	0.441	1	MA0164.1	Nr2e3
MA1104.2	0.000945227	0.873028	0.75	0.465	1	MA1104.2	GATA6
MA1653.1	0.00096582	0.518265	0.6	0.489	1	MA1653.1	ZNF148
MA0938.1	0.000988275	0.938979	0.675	0.457	1	MA0938.1	NAC058
MA0405.1	0.00116939	0.941108	0.7	0.489	1	MA0405.1	TEA1
MA1579.1	0.00125556	0.805023	0.675	0.446	1	MA1579.1	ZBTB26
MA0937.1	0.00133832	1.28693	0.7	0.491	1	MA0937.1	NAC055
MA0211.1	0.00143989	0.423903	0.75	0.484	1	MA0211.1	bap
MA1356.1	0.00151569	0.706668	0.675	0.486	1	MA1356.1	TRP2
MA1431.1	0.00160207	0.793123	0.65	0.483	1	MA1431.1	rst2
MA1527.1	0.00165896	1.01594	0.625	0.46	1	MA1527.1	NFIC(var.2)
MA0262.1	0.00233317	0.708054	0.675	0.465	1	MA0262.1	mab-3
MA1235.1	0.00239343	0.335392	0.675	0.477	1	MA1235.1	AIL7
MA0540.1	0.00284055	0.721301	0.7	0.457	1	MA0540.1	dpy-27
MA0936.1	0.00297969	0.593897	0.725	0.473	1	MA0936.1	T11I18.17
MA0306.1	0.0030549	0.686355	0.7	0.484	1	MA0306.1	GIS1
MA1643.1	0.00308535	0.701038	0.6	0.467	1	MA1643.1	NFIB
MA0343.1	0.00322778	0.363821	0.625	0.466	1	MA0343.1	NDT80
MA1439.1	0.00323486	0.474861	0.65	0.465	1	MA1439.1	elt-6
MA0124.2	0.00339208	0.396331	0.7	0.469	1	MA0124.2	Nkx3-1
MA0029.1	0.00348103	0.40656	0.625	0.461	1	MA0029.1	Mecom
MA1188.1	0.00411404	0.340702	0.675	0.473	1	MA1188.1	At3g11280
MA0961.1	0.00412698	1.06056	0.7	0.471	1	MA0961.1	BHLH112
MA0777.1	0.00419494	0.592495	0.625	0.465	1	MA0777.1	MYBL2
MA1561.1	0.00432085	0.84797	0.625	0.448	1	MA1561.1	SOX12
MA1117.1	0.00456349	0.6278	0.675	0.449	1	MA1117.1	RELB
MA0739.1	0.00463224	1.05071	0.575	0.458	1	MA0739.1	Hic1
MA1071.1	0.00468144	0.523483	0.55	0.437	1	MA1071.1	DOF5.3
MA0445.1	0.00481181	0.877948	0.6	0.45	1	MA0445.1	D
MA0543.1	0.0056134	0.694745	0.7	0.46	1	MA0543.1	eor-1
MA0122.3	0.0063573	0.321457	0.7	0.477	1	MA0122.3	Nkx3-2
MA1695.1	0.00716604	0.569013	0.675	0.466	1	MA1695.1	ARF36
MA1269.1	0.00737357	0.369924	0.725	0.449	1	MA1269.1	dof4.5
MA0327.1	0.00738806	0.368874	0.6	0.448	1	MA0327.1	HMRA1
MA1514.1	0.00740225	0.377256	0.65	0.456	1	MA1514.1	KLF17
MA1413.1	0.00769985	0.426513	0.6	0.477	1	MA1413.1	UIF1
MA1352.1	0.00778456	0.50277	0.7	0.48	1	MA1352.1	TRP1
MA0586.2	0.00812486	0.287864	0.725	0.48	1	MA0586.2	SPL14
MA0284.1	0.00832282	0.427017	0.65	0.471	1	MA0284.1	CIN5
MA0963.1	0.00904095	0.294628	0.675	0.47	1	MA0963.1	BHLH78
MA1528.1	0.00945056	0.675632	0.7	0.469	1	MA1528.1	NFIX(var.2)
MA1307.1	0.00954017	0.443838	0.675	0.471	1	MA1307.1	WRKY31
MA1596.1	0.00966154	0.349566	0.6	0.483	1	MA1596.1	ZNF460
MA1353.1	0.00982966	0.297468	0.575	0.467	1	MA1353.1	AT1G72740
MA0119.1	0.0101696	0.524764	0.6	0.468	1	MA0119.1	NFIC::TLX1
MA0984.1	0.0105661	1.12653	0.6	0.441	1	MA0984.1	DOF5.7
MA1692.1	0.0112917	0.379021	0.625	0.464	1	MA1692.1	ARF29
MA0330.1	0.0114012	1.63678	0.675	0.488	1	MA0330.1	MBP1::SWI6
MA1090.1	0.0116798	0.460272	0.65	0.481	1	MA1090.1	WRKY60
MA1685.1	0.0116962	0.788208	0.65	0.473	1	MA1685.1	ARF10
MA1060.1	0.0120876	1.19303	0.65	0.494	1	MA1060.1	SPL7
MA1115.1	0.0123132	0.426306	0.675	0.483	1	MA1115.1	POU5F1
MA0023.1	0.0125714	0.613897	0.7	0.455	1	MA0023.1	dl(var.2)
MA0285.1	0.0128223	0.352421	0.675	0.464	1	MA0285.1	CRZ1
MA0670.1	0.013077	0.334546	0.65	0.449	1	MA0670.1	NFIA
MA0422.1	0.0132423	0.856594	0.575	0.488	1	MA0422.1	URC2
MA0432.1	0.0132533	0.358613	0.625	0.473	1	MA0432.1	YNR063W
MA0020.1	0.0132755	0.265965	0.625	0.428	1	MA0020.1	Dof2
MA0442.2	0.013283	0.275782	0.675	0.453	1	MA0442.2	SOX10
MA1694.1	0.0137352	1.11884	0.6	0.476	1	MA1694.1	ARF35
MA0604.1	0.0138441	0.430544	0.7	0.517	1	MA0604.1	Atf1
MA0865.1	0.0141478	1.09165	0.525	0.466	1	MA0865.1	E2F8
MA0789.1	0.0148017	1.7733	0.6	0.493	1	MA0789.1	POU3F4
MA1025.1	0.0154845	0.482425	0.625	0.483	1	MA1025.1	HBI1
MA0959.1	0.0156365	0.519149	0.6	0.467	1	MA0959.1	AIB
MA1154.1	0.0156628	0.334603	0.65	0.449	1	MA1154.1	ZNF282
MA1116.1	0.0167202	0.432505	0.525	0.45	1	MA1116.1	RBPJ
MA1153.1	0.0173659	1.00437	0.625	0.471	1	MA1153.1	Smad4
MA1667.1	0.0175152	0.832304	0.55	0.44	1	MA1667.1	HSFC1
MA0983.1	0.0176312	1.15252	0.575	0.466	1	MA0983.1	DOF5.6
MA0565.2	0.0180448	0.375066	0.65	0.461	1	MA0565.2	FUS3
MA0507.1	0.0181164	0.548341	0.6	0.493	1	MA0507.1	POU2F2
MA0080.5	0.0188297	0.497886	0.6	0.439	1	MA0080.5	SPI1
MA0471.2	0.0191927	0.308748	0.575	0.451	1	MA0471.2	E2F6
MA0389.1	0.0193655	0.425273	0.575	0.5	1	MA0389.1	SRD1
MA0862.1	0.0199535	0.992398	0.625	0.487	1	MA0862.1	GMEB2
MA0301.1	0.0205979	0.42907	0.6	0.489	1	MA0301.1	GAT3
MA1080.1	0.0207209	0.50274	0.575	0.454	1	MA1080.1	WRKY23
MA0671.1	0.0220869	0.285468	0.625	0.479	1	MA0671.1	NFIX
MA0049.1	0.023487	0.663979	0.525	0.44	1	MA0049.1	hb
MA0051.1	0.0241299	0.422777	0.575	0.444	1	MA0051.1	IRF2
MA1560.1	0.0270839	0.649071	0.65	0.489	1	MA1560.1	SOHLH2
MA0005.2	0.0319983	0.456551	0.575	0.477	1	MA0005.2	AG
MA0935.1	0.0321097	0.259154	0.65	0.486	1	MA0935.1	NAC025
MA1666.1	0.0356873	0.533944	0.55	0.445	1	MA1666.1	HSFB2B
MA1600.1	0.0377734	0.633324	0.6	0.48	1	MA1600.1	ZNF684
MA1122.1	0.0379632	0.32654	0.65	0.504	1	MA1122.1	TFDP1
MA1677.1	0.0379907	0.425506	0.575	0.475	1	MA1677.1	NAC078
MA0966.1	0.0385722	0.370011	0.625	0.488	1	MA0966.1	BIM3
MA0253.1	0.0387267	0.312267	0.675	0.469	1	MA0253.1	vnd
MA1664.1	0.0416853	0.5921	0.6	0.456	1	MA1664.1	HSFA6B
MA1191.1	0.0427191	0.296585	0.525	0.477	1	MA1191.1	AT3G10113
MA0989.1	0.0458041	0.380247	0.525	0.466	1	MA0989.1	PHYPADRAFT_153324
MA0532.1	0.0458823	0.727066	0.525	0.439	1	MA0532.1	Stat92E
MA1522.1	0.0461294	0.573028	0.55	0.477	1	MA1522.1	MAZ
MA1163.1	0.0471523	0.302312	0.55	0.487	1	MA1163.1	PHL11
MA1689.1	0.0504607	0.644485	0.6	0.464	1	MA1689.1	ARF18
MA0007.3	0.0520423	0.27329	0.6	0.465	1	MA0007.3	Ar
MA0753.2	0.0549782	0.269145	0.6	0.462	1	MA0753.2	ZNF740
MA0222.1	0.059875	0.321303	0.6	0.481	1	MA0222.1	exd
MA1320.1	0.0610739	0.36772	0.575	0.49	1	MA1320.1	SPL15
MA0972.1	0.0627728	0.360718	0.575	0.468	1	MA0972.1	CCA1
MA0925.1	0.0635661	0.270465	0.575	0.463	1	MA0925.1	sma-4
MA1702.1	0.0644719	1.25435	0.575	0.469	1	MA1702.1	Pdp1
MA0434.1	0.0666753	0.421839	0.65	0.481	1	MA0434.1	YPR013C
MA1165.1	0.0670695	0.736983	0.575	0.456	1	MA1165.1	HHO6
MA1385.1	0.0715933	0.290645	0.625	0.476	1	MA1385.1	AT2G40260
MA0965.1	0.0730009	0.375961	0.675	0.501	1	MA0965.1	BIM2
MA1021.1	0.0745745	0.4297	0.65	0.488	1	MA1021.1	PHYPADRAFT_48267
MA0771.1	0.0780495	0.510499	0.5	0.451	1	MA0771.1	HSF4
MA0973.1	0.080949	0.440366	0.55	0.46	1	MA0973.1	CDF2
MA0372.1	0.0823922	0.386572	0.55	0.481	1	MA0372.1	RPH1
MA0930.1	0.084924	1.1525	0.5	0.483	1	MA0930.1	ABF3
MA1083.1	0.0856935	0.394982	0.65	0.452	1	MA1083.1	WRKY30
MA0794.1	0.0879803	0.311251	0.675	0.483	1	MA0794.1	PROX1
MA1674.1	0.0975251	0.321023	0.55	0.481	1	MA1674.1	NAC017
MA1657.1	0.0987114	0.26924	0.55	0.481	1	MA1657.1	ZNF652
MA0519.1	0.100396	0.320626	0.575	0.439	1	MA0519.1	Stat5a::Stat5b
MA1562.1	0.100418	0.894302	0.6	0.437	1	MA1562.1	SOX14
MA0274.1	0.10209	0.391722	0.575	0.48	1	MA0274.1	ARR1
MA0361.1	0.103008	0.416806	0.65	0.495	1	MA0361.1	RDS1
MA1057.1	0.103881	0.471326	0.55	0.48	1	MA1057.1	SPL12
MA0673.1	0.105181	0.334473	0.6	0.488	1	MA0673.1	NKX2-8
MA0294.1	0.119712	0.515364	0.6	0.482	1	MA0294.1	EDS1
MA1656.1	0.121875	0.355676	0.5	0.461	1	MA1656.1	ZNF449
MA0025.2	0.135263	0.42333	0.575	0.471	1	MA0025.2	NFIL3
MA1701.1	0.13859	0.386641	0.475	0.461	1	MA1701.1	elt-2
MA0637.1	0.149217	0.309099	0.525	0.48	1	MA0637.1	CENPB
MA1418.1	0.155169	0.293275	0.525	0.437	1	MA1418.1	IRF3
MA1125.1	0.158452	0.421408	0.525	0.454	1	MA1125.1	ZNF384
MA1189.1	0.161006	0.333659	0.525	0.484	1	MA1189.1	AT5G61620
MA1476.1	0.161349	0.341983	0.525	0.473	1	MA1476.1	DLX5
MA0792.1	0.163434	1.02685	0.625	0.499	1	MA0792.1	POU5F1B
MA0486.2	0.16833	0.322644	0.575	0.442	1	MA0486.2	HSF1
MA1592.1	0.175803	0.685198	0.55	0.468	1	MA1592.1	ZNF274
MA1603.1	0.180422	0.508194	0.525	0.473	1	MA1603.1	Dmrt1
MA0107.1	0.186541	0.287496	0.575	0.47	1	MA0107.1	RELA
MA0589.1	0.194214	0.382928	0.525	0.477	1	MA0589.1	ZAP1
MA0576.1	0.203043	0.541315	0.575	0.482	1	MA0576.1	RAX3
MA0247.2	0.208655	0.317344	0.55	0.462	1	MA0247.2	tin
MA1285.1	0.216359	0.307241	0.525	0.483	1	MA1285.1	At2g45680
MA1654.1	0.221767	0.590549	0.475	0.463	1	MA1654.1	ZNF16
MA0435.1	0.257422	0.552576	0.575	0.494	1	MA0435.1	YPR015C
MA0695.1	0.25883	0.278766	0.55	0.48	1	MA0695.1	ZBTB7C
MA1056.1	0.259903	0.392926	0.5	0.484	1	MA1056.1	SPL11
MA0264.1	0.291618	0.889001	0.5	0.474	1	MA0264.1	ceh-22
MA1378.1	0.310099	0.286249	0.525	0.484	1	MA1378.1	PLT3
MA0413.1	0.318085	0.271208	0.5	0.487	1	MA0413.1	USV1
MA0126.1	0.318125	0.558716	0.4	0.471	1	MA0126.1	ovo
MA0239.1	0.318125	0.558716	0.4	0.471	1	MA0239.1	prd
MA0193.1	0.328095	0.793559	0.5	0.482	1	MA0193.1	schlank
MA0382.1	0.334601	0.393588	0.5	0.482	1	MA0382.1	SKO1
MA0289.1	0.349977	0.430868	0.6	0.483	1	MA0289.1	DAL80
MA0466.2	0.387157	0.350841	0.475	0.458	1	MA0466.2	CEBPB
MA0325.1	0.388144	0.678972	0.575	0.479	1	MA0325.1	LYS14
MA1229.1	0.389178	0.276976	0.475	0.472	1	MA1229.1	AT2G44940
MA0266.1	0.390581	0.265701	0.55	0.465	1	MA0266.1	ABF2
MA1520.1	0.446429	0.256761	0.6	0.451	1	MA1520.1	MAF
MA0837.1	0.448829	0.377527	0.5	0.453	1	MA0837.1	CEBPE
MA0884.1	0.456899	0.320135	0.55	0.491	1	MA0884.1	DUXA
MA1668.1	0.465385	0.617068	0.5	0.465	1	MA1668.1	DPBF3
MA0955.1	0.477017	0.297322	0.575	0.478	1	MA0955.1	POPTR_0002s00440g
MA1203.1	0.487965	0.327152	0.525	0.46	1	MA1203.1	AGL63
MA0785.1	0.488061	0.81566	0.5	0.494	1	MA0785.1	POU2F1
MA1690.1	0.550394	0.273249	0.425	0.471	1	MA1690.1	ARF25
MA0787.1	0.563162	0.278747	0.525	0.498	1	MA0787.1	POU3F2
MA1152.1	0.569929	0.390263	0.425	0.466	1	MA1152.1	SOX15
MA0868.2	0.570175	0.531489	0.5	0.446	1	MA0868.2	SOX8
MA1589.1	0.577471	0.469584	0.475	0.457	1	MA1589.1	ZNF140
MA0451.1	0.608596	0.434859	0.5	0.46	1	MA0451.1	kni
MA0109.1	0.617109	0.501779	0.425	0.518	1	MA0109.1	HLTF
MA1027.1	0.62437	0.253679	0.525	0.488	1	MA1027.1	KAN1
MA1663.1	0.692459	0.832959	0.525	0.48	1	MA1663.1	ANAC050
MA0838.1	0.704318	0.574528	0.475	0.46	1	MA0838.1	CEBPG
MA0559.1	0.727782	0.257396	0.35	0.422	1	MA0559.1	PI
MA1325.1	0.732922	0.420446	0.475	0.474	1	MA1325.1	GATA14
MA0932.1	0.788715	0.299171	0.45	0.493	1	MA0932.1	AHL12
MA0934.1	0.788715	0.299171	0.45	0.493	1	MA0934.1	AHL25
MA0945.1	0.824908	0.327699	0.5	0.474	1	MA0945.1	ARR1

[truncated: 26 more sheets: 11 MHB.1, 12 MHB.2, 13 MHB.3, 14 MHB.4, 15 MHB.5, 16 MHB.6, 17 Mitochondrial, 18 NC.1, 19 NC.2, 20 Neurog, 21 Neuron.1, 22 Neuron.2, 23 r1, 24 r1&r2.1, 25 r2, 26 r3, 27 r4.1, 28 r4.2, 29 r5.1, 30 r5.2 …]
