# Supplementary material for: scMultiome analysis identifies embryonic hindbrain progenitors with mixed rhombomere identities
Source: eLife journal article supplement (doi:10.7554/elife.87772), 2023-11-10

A

wnnMAP\_2

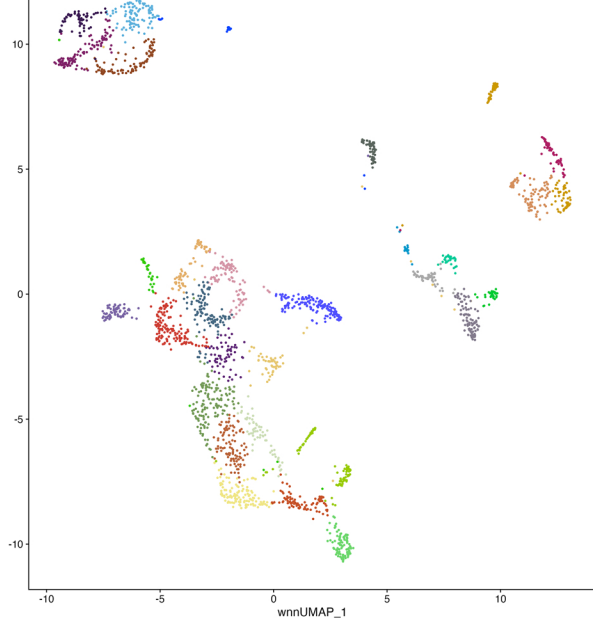

- NC.1
- r1/r2/r4
- MHB.1
- MB.1
- HB-like
- MHB.2
- Placode.1
- Placode.2
- Eye.1
- SC.1
- Placode.3
- vasculature
- FB/eye.1
- muscle.1
- r3
- SC.2?
- placode.4
- MHB.3
- NC.2?
- somite
- ribosomal
- endoderm?
- muscle.2
- eye.2
- heart
- notochord
- ciliated
- neuron
- skeletal
- blood
- kidney
- epidermis

B

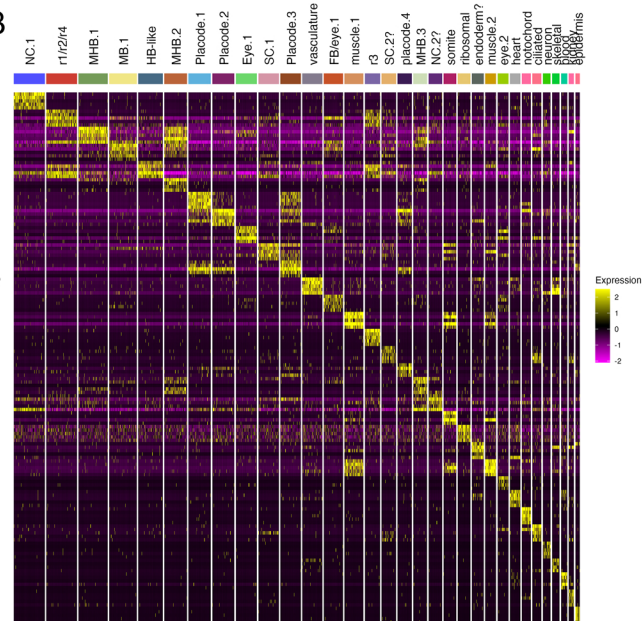

C

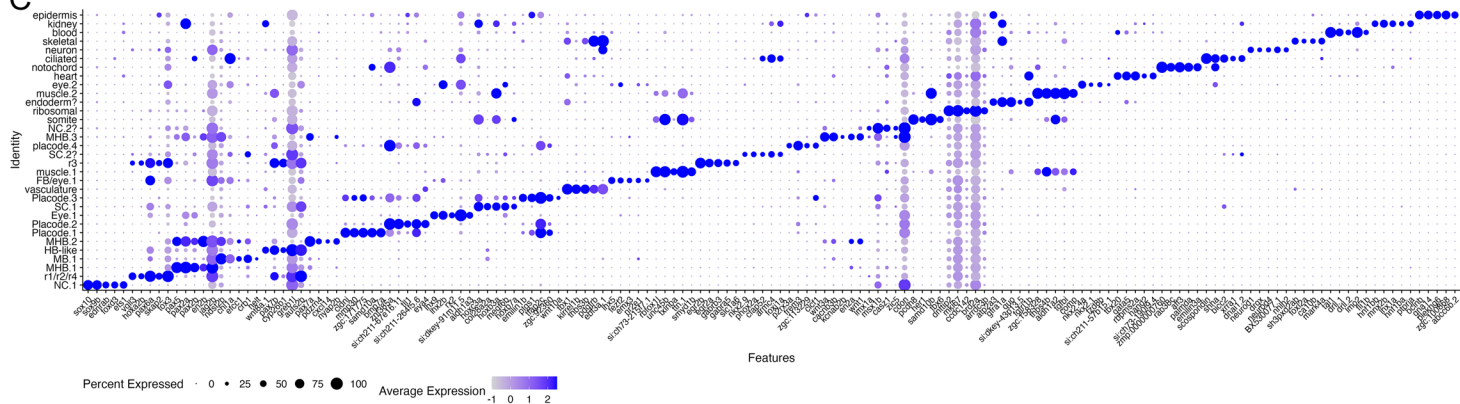

Supplement: supp [file elife-87772-supp-v1.zip]
