# Supplementary figures and images for: scMultiome analysis identifies embryonic hindbrain progenitors with mixed rhombomere identities
Source: eLife journal article supplement (doi:10.7554/elife.87772), 2023-11-10

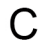

## Clusters

# B

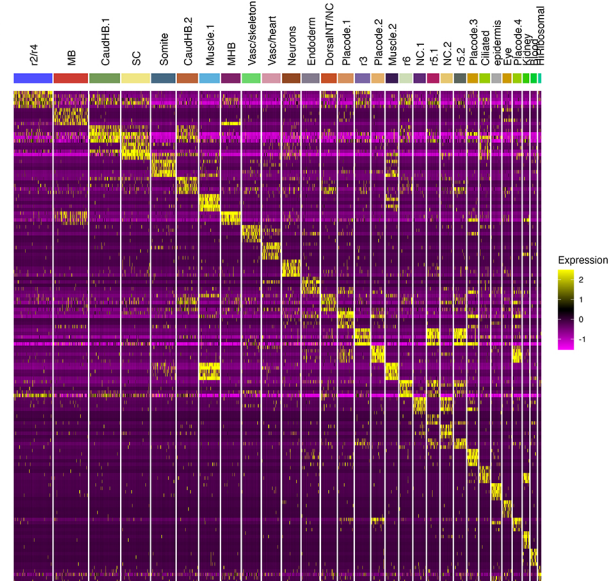

Expression

Supplement: supp [file elife-87772-supp-v1.zip]

A

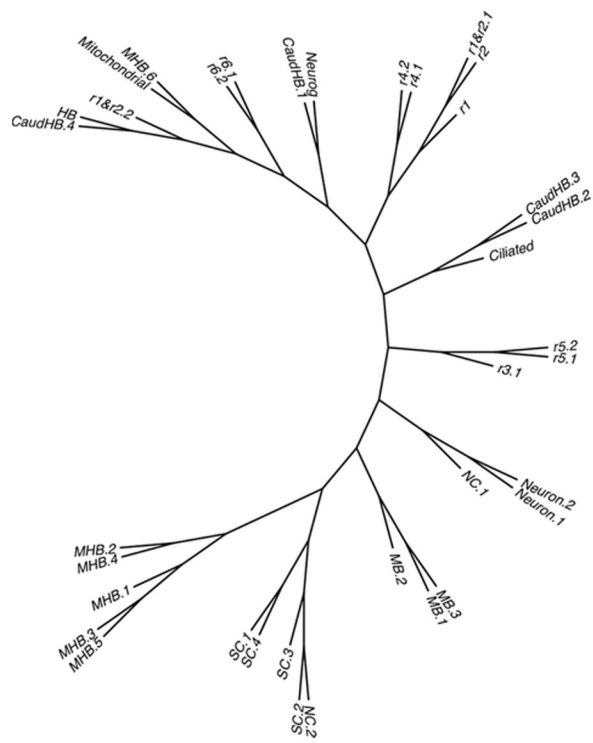

B

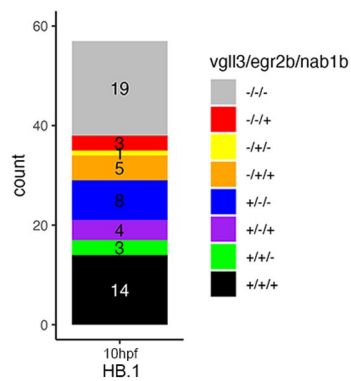

C

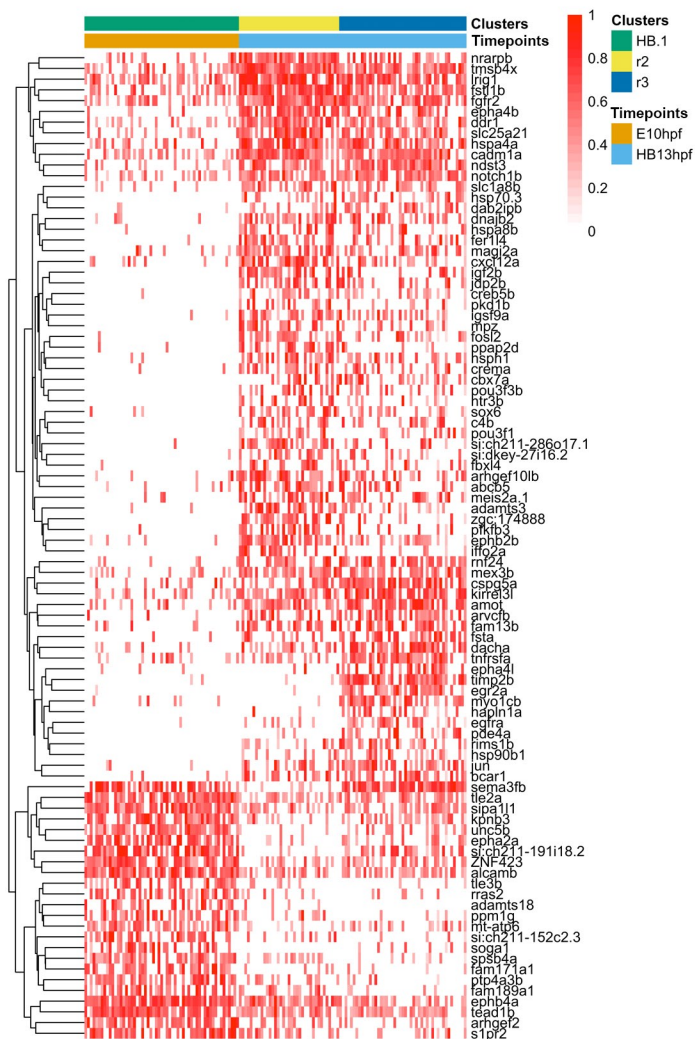

D

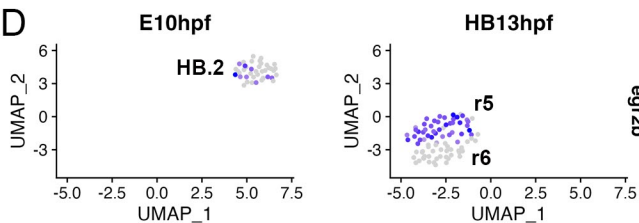

E

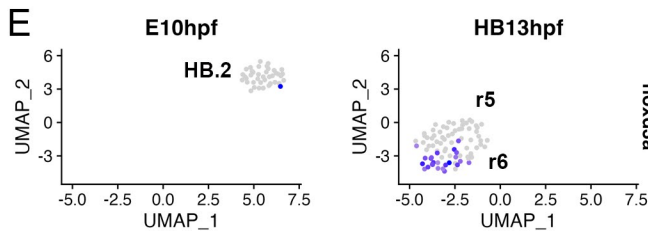

F

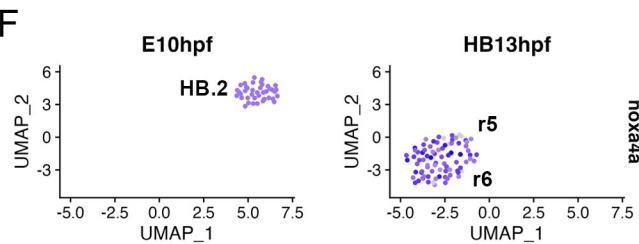

G

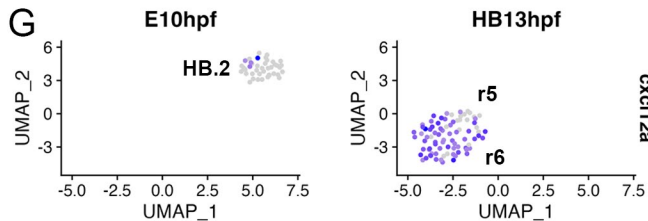

H

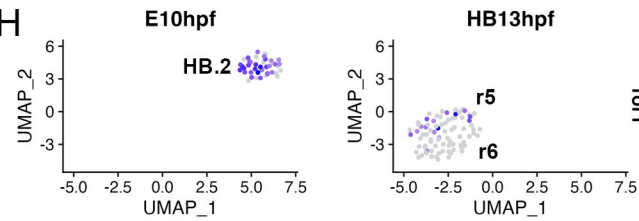

Supplement: supp [file elife-87772-supp-v1.zip]

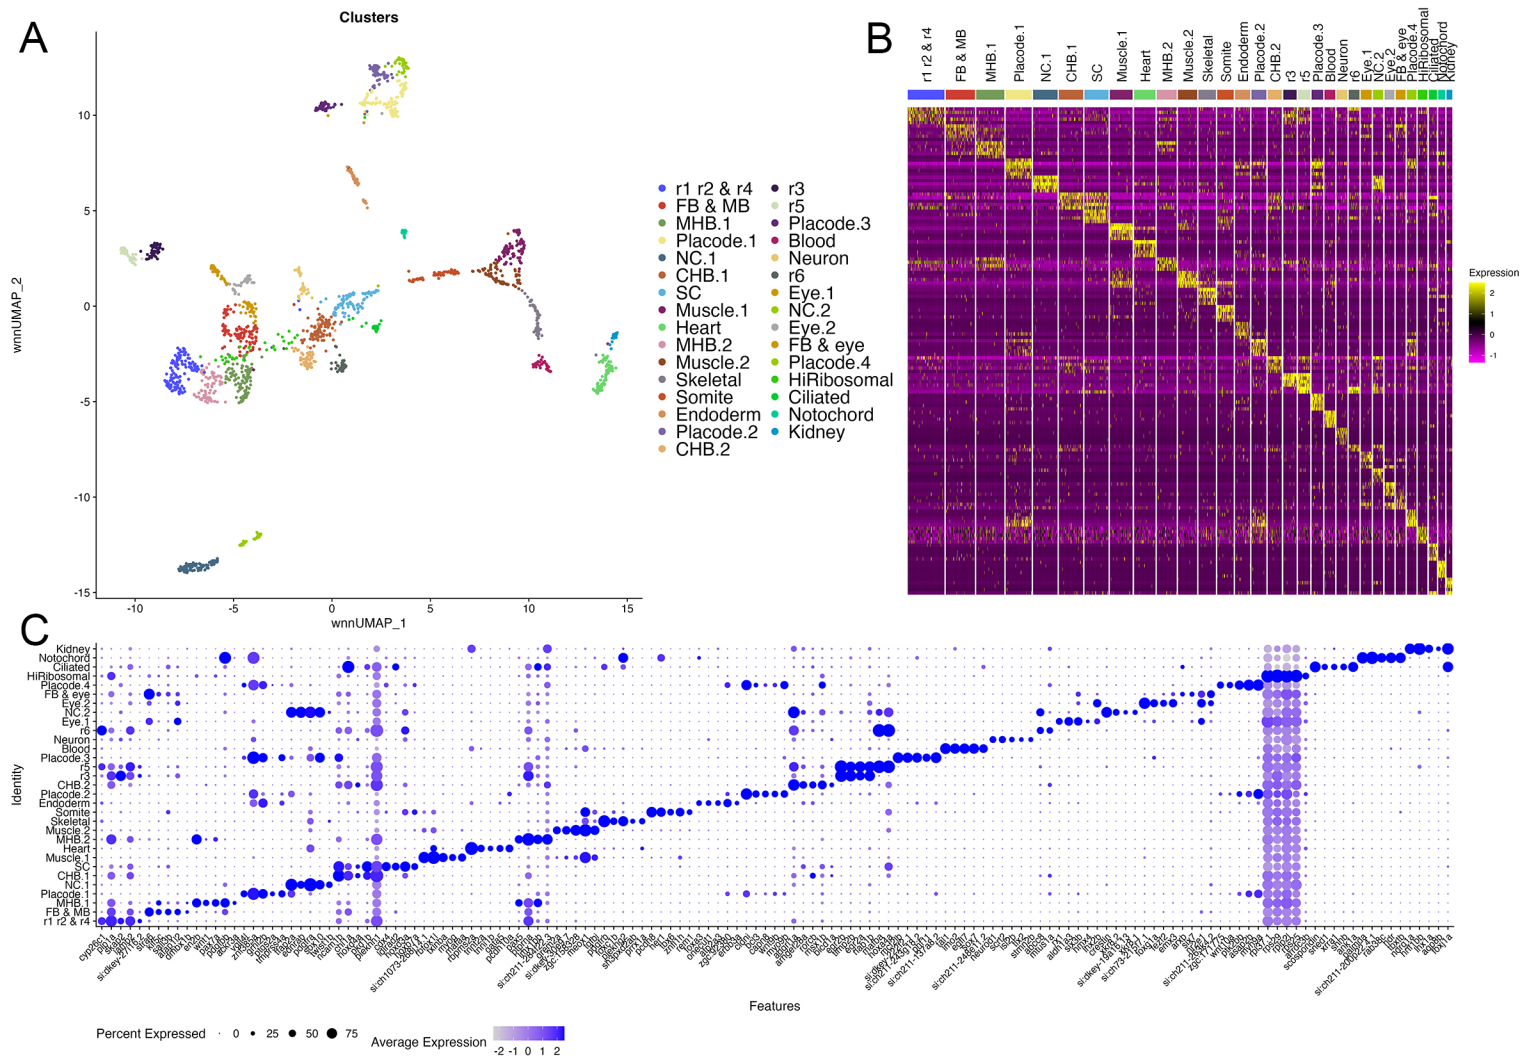

Supplement: supp [file elife-87772-supp-v1.zip]

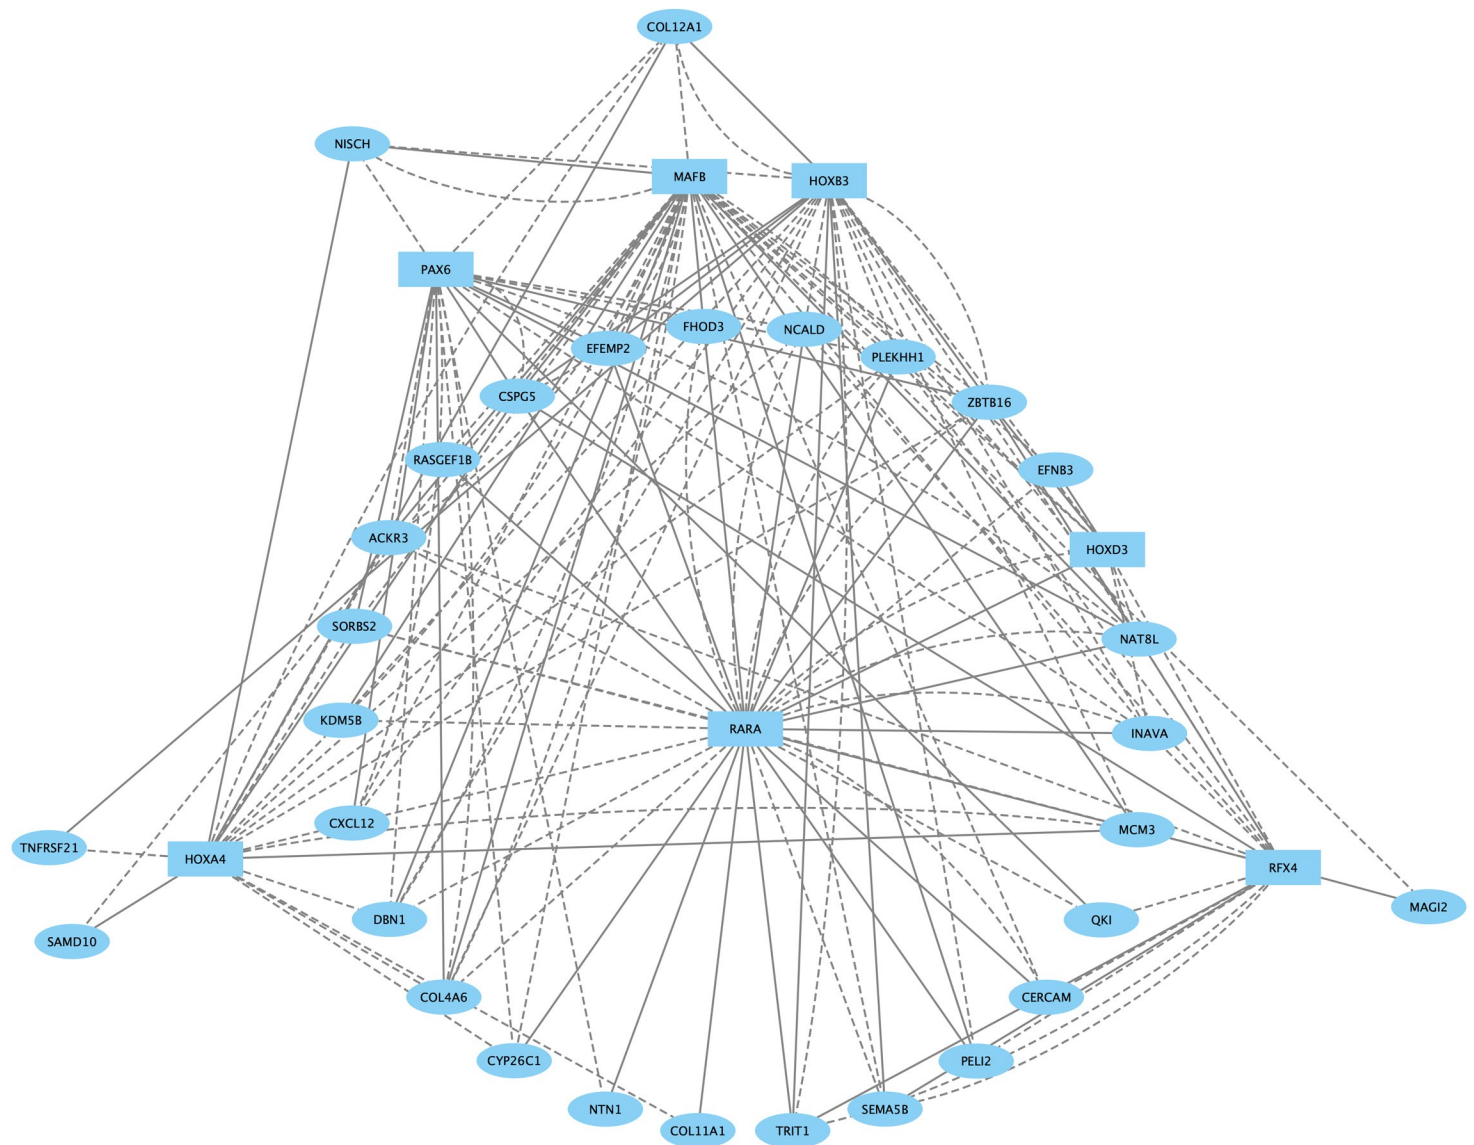

Supplement: supp [file elife-87772-supp-v1.zip]

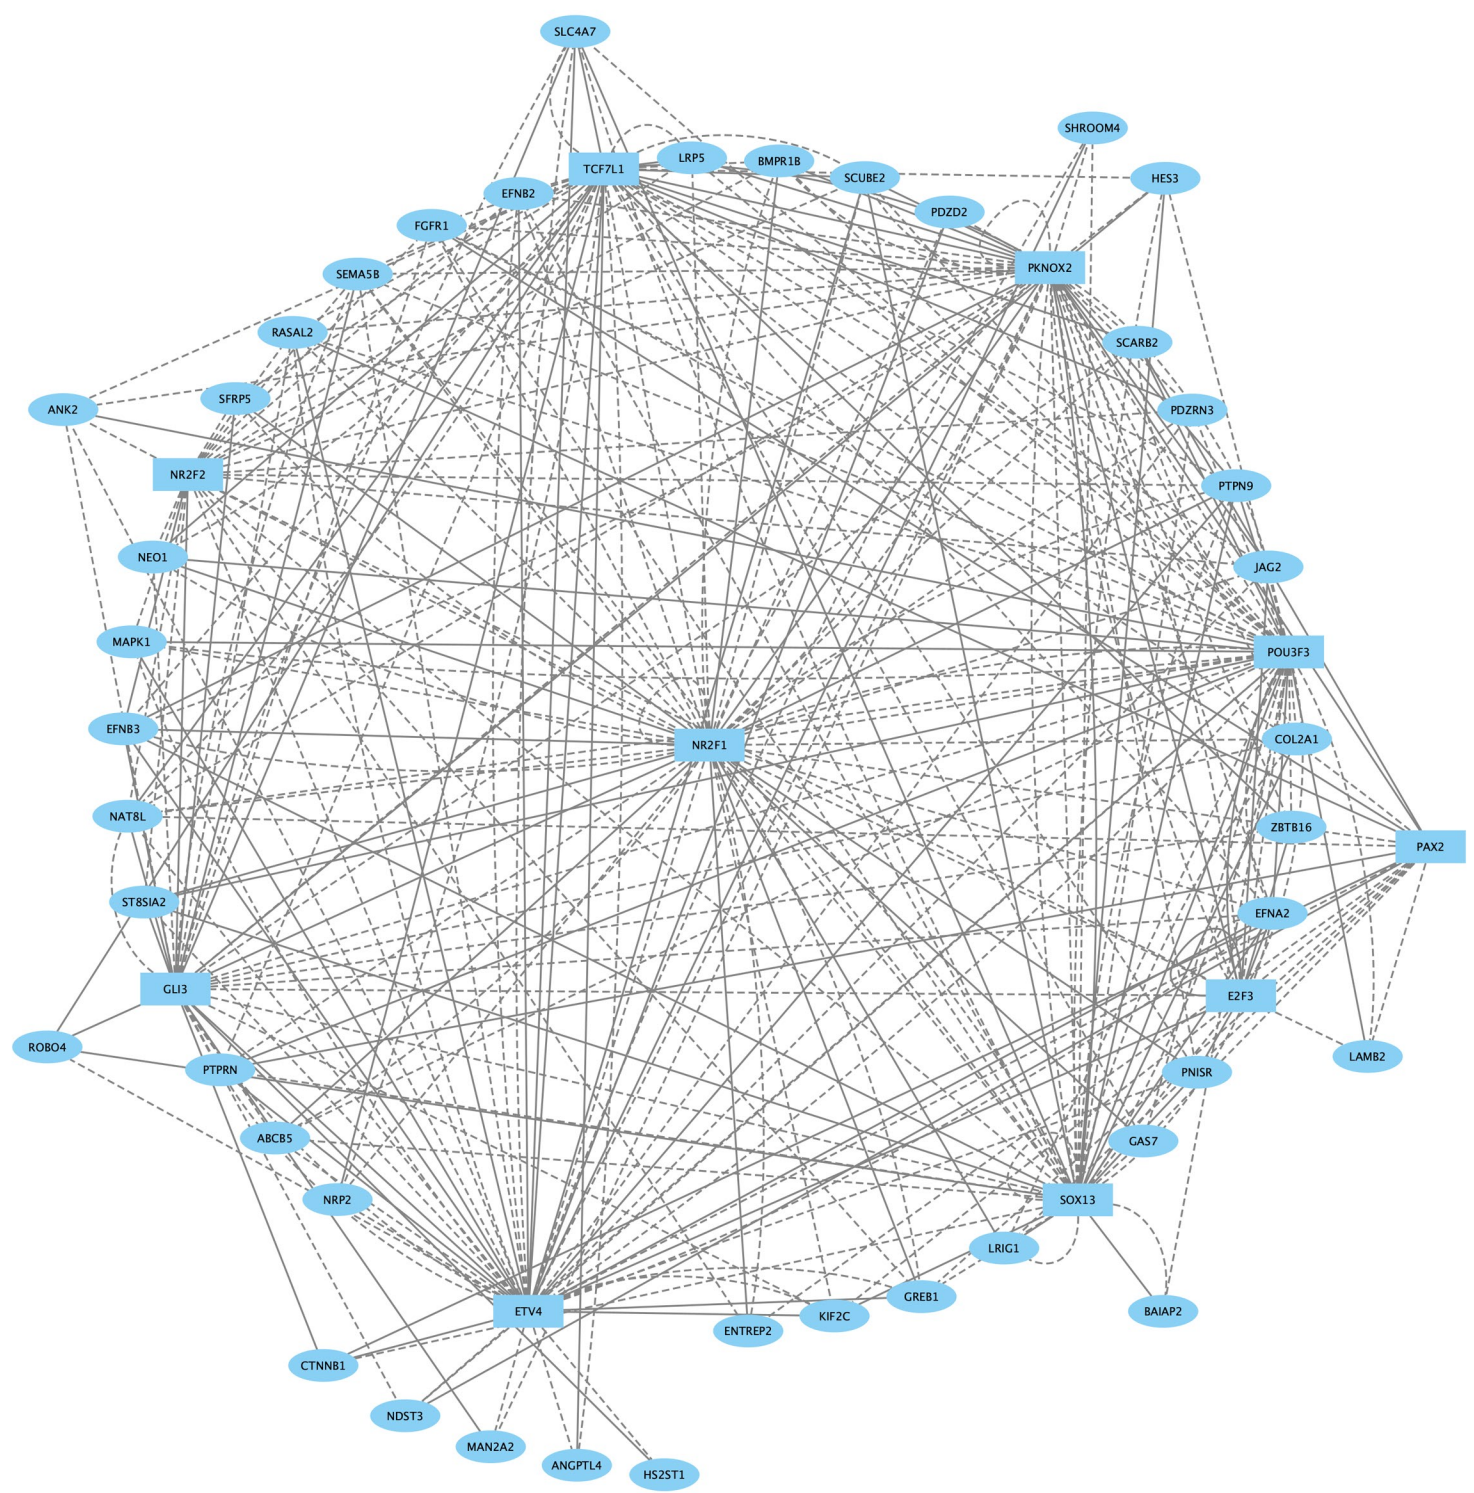

Supplement: supp [file elife-87772-supp-v1.zip]

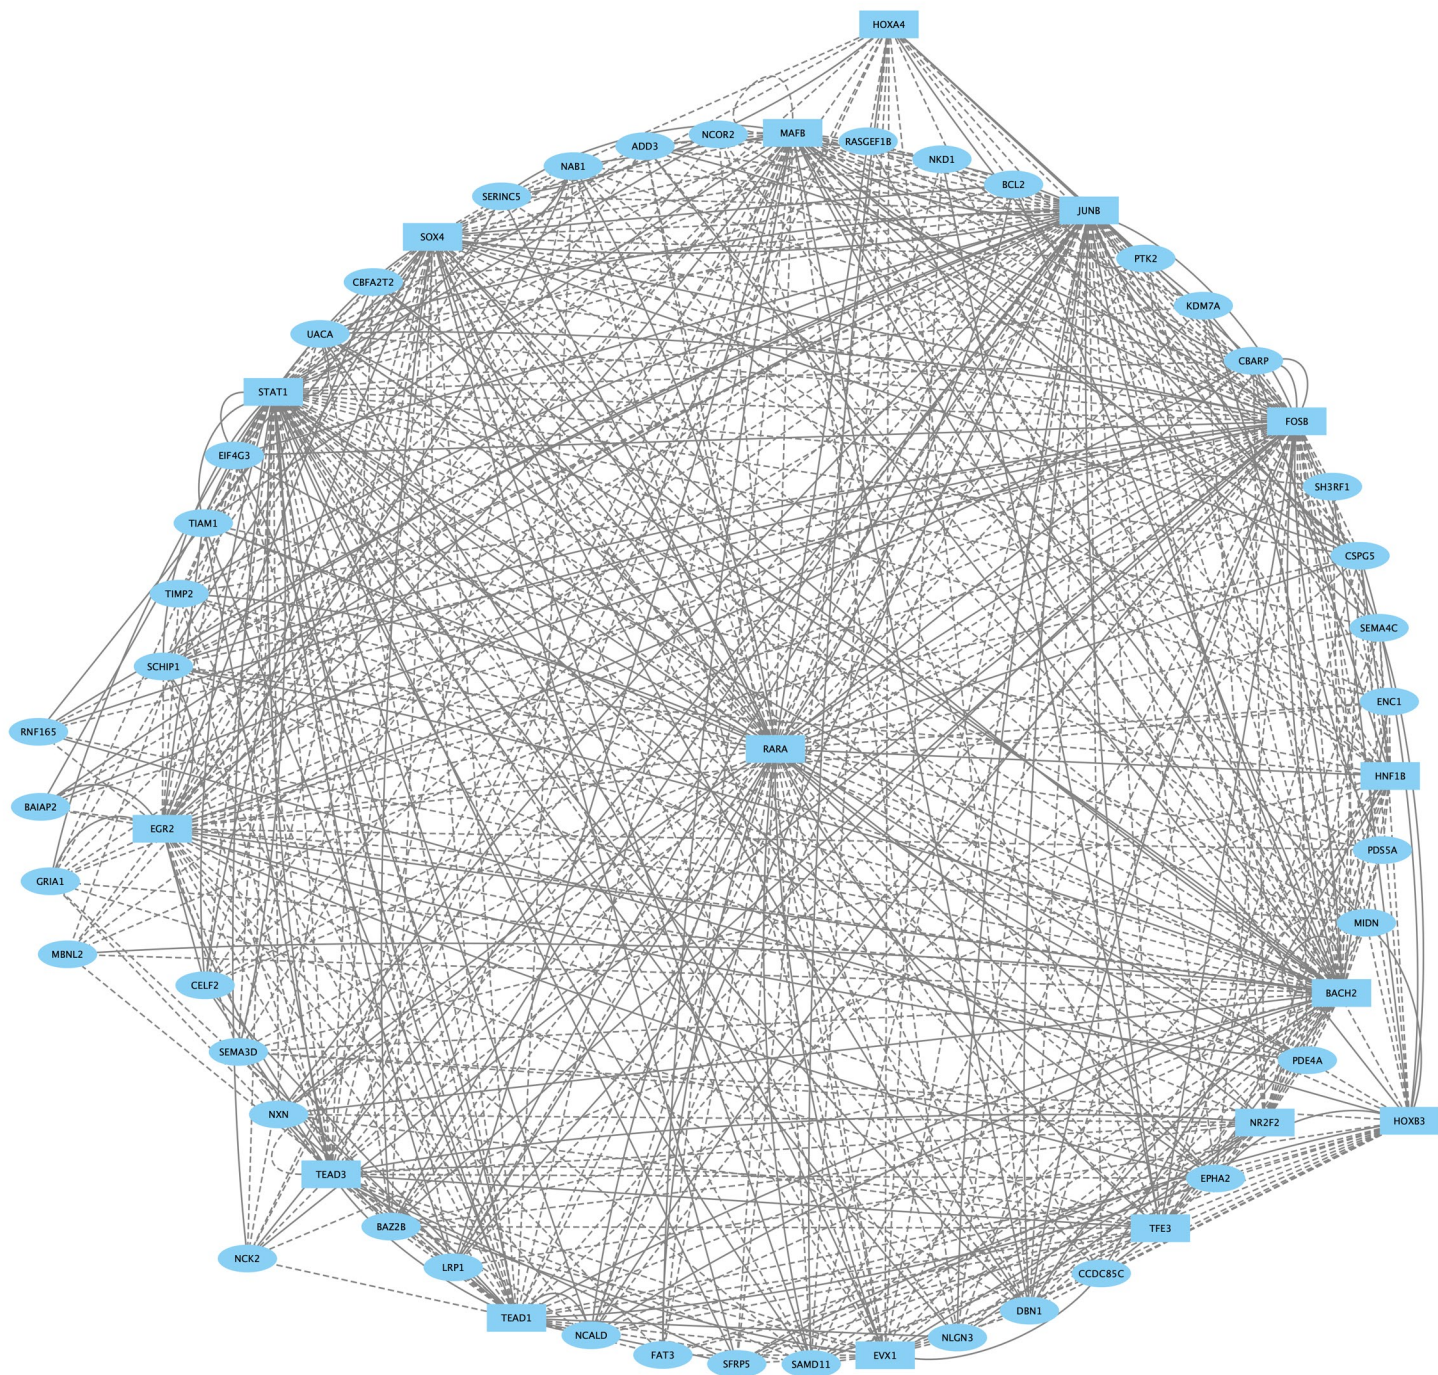

Supplement: supp [file elife-87772-supp-v1.zip]

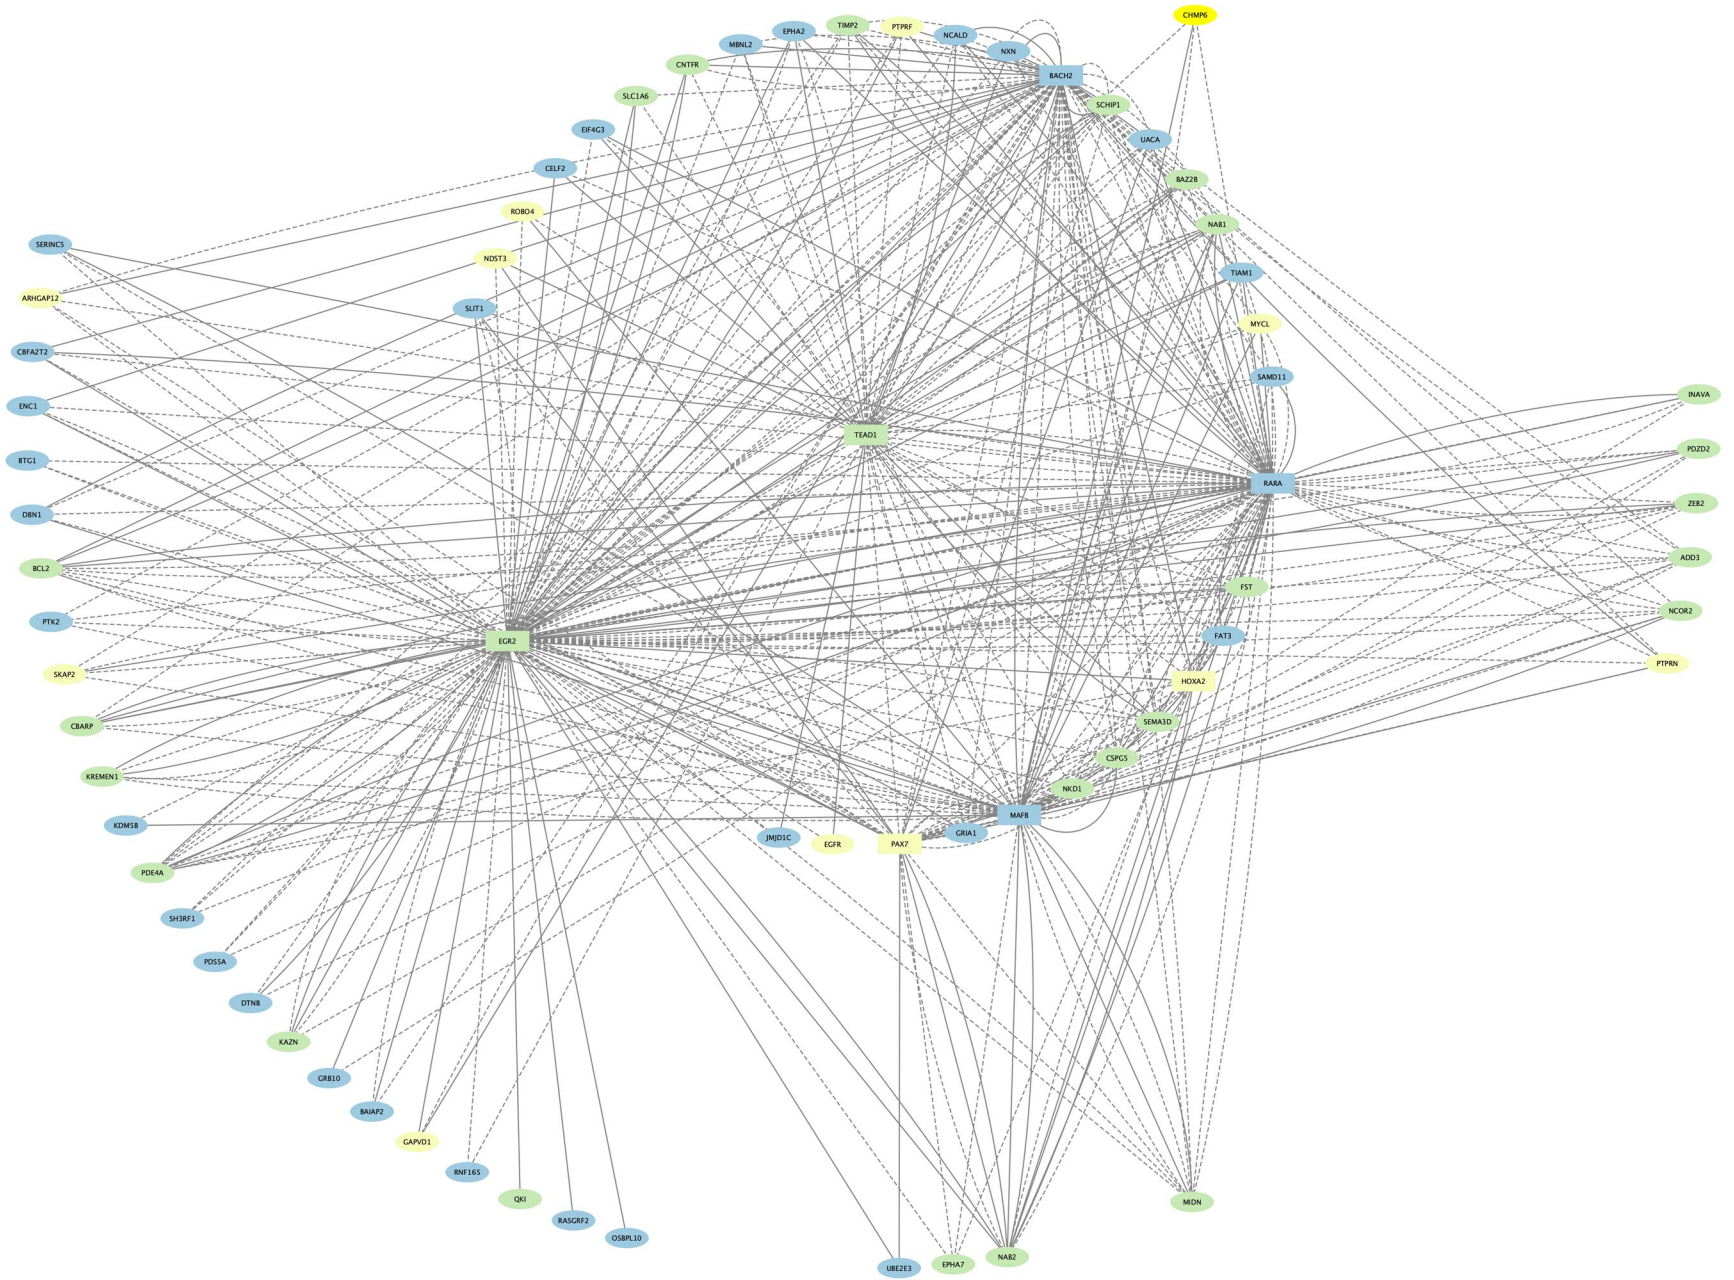

Supplement: supp [file elife-87772-supp-v1.zip]

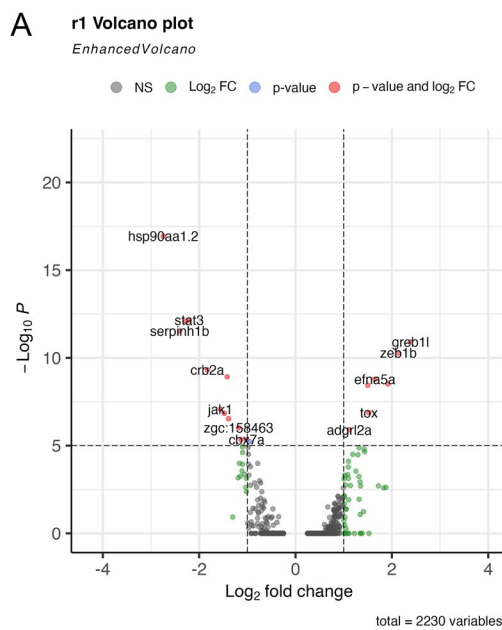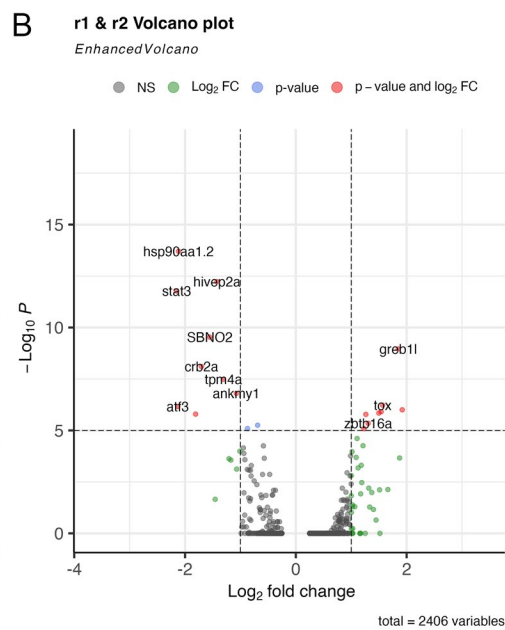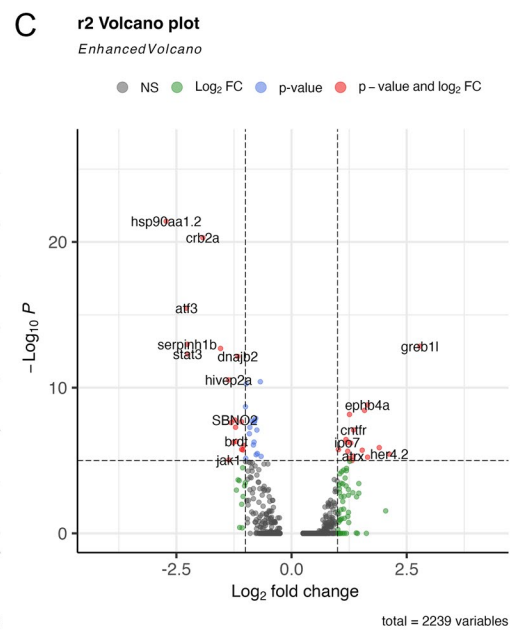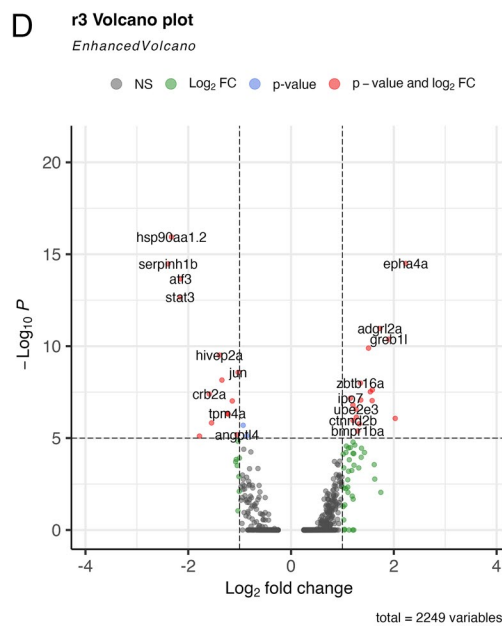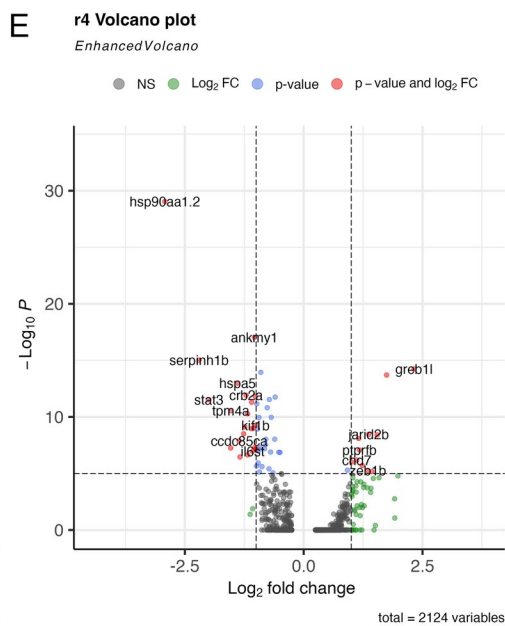

Supplement: supp [file elife-87772-supp-v1.zip]

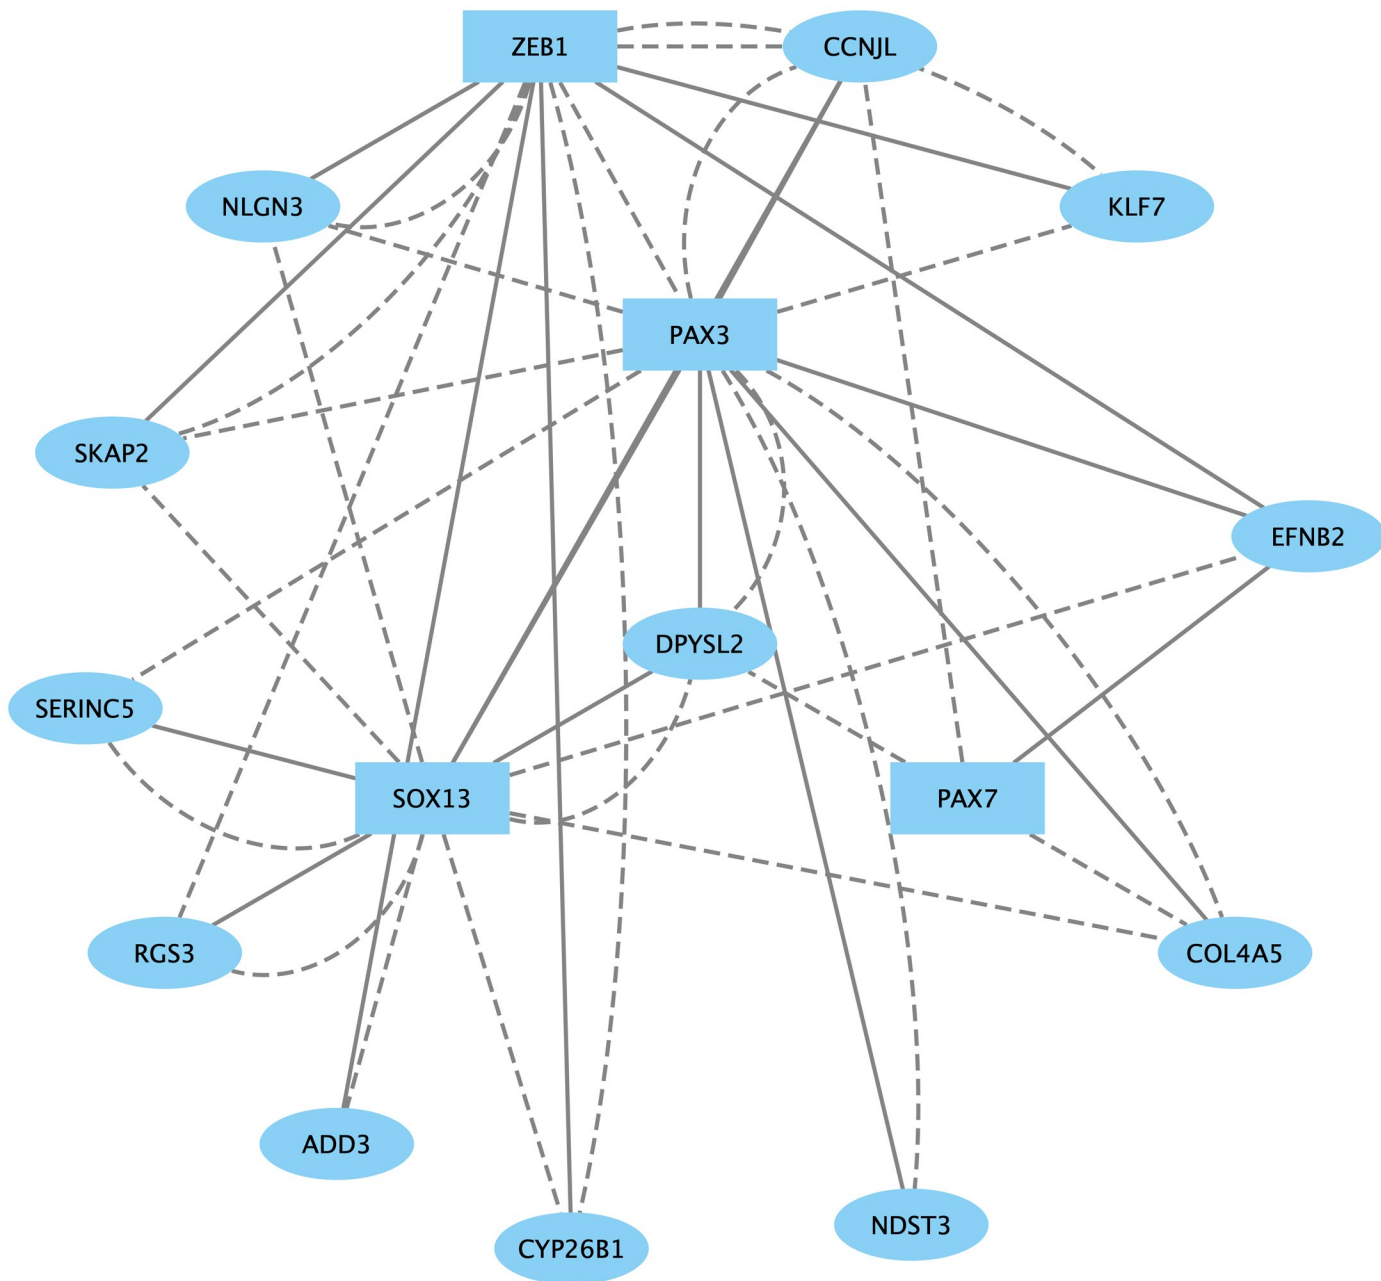

Supplement: supp [file elife-87772-supp-v1.zip]

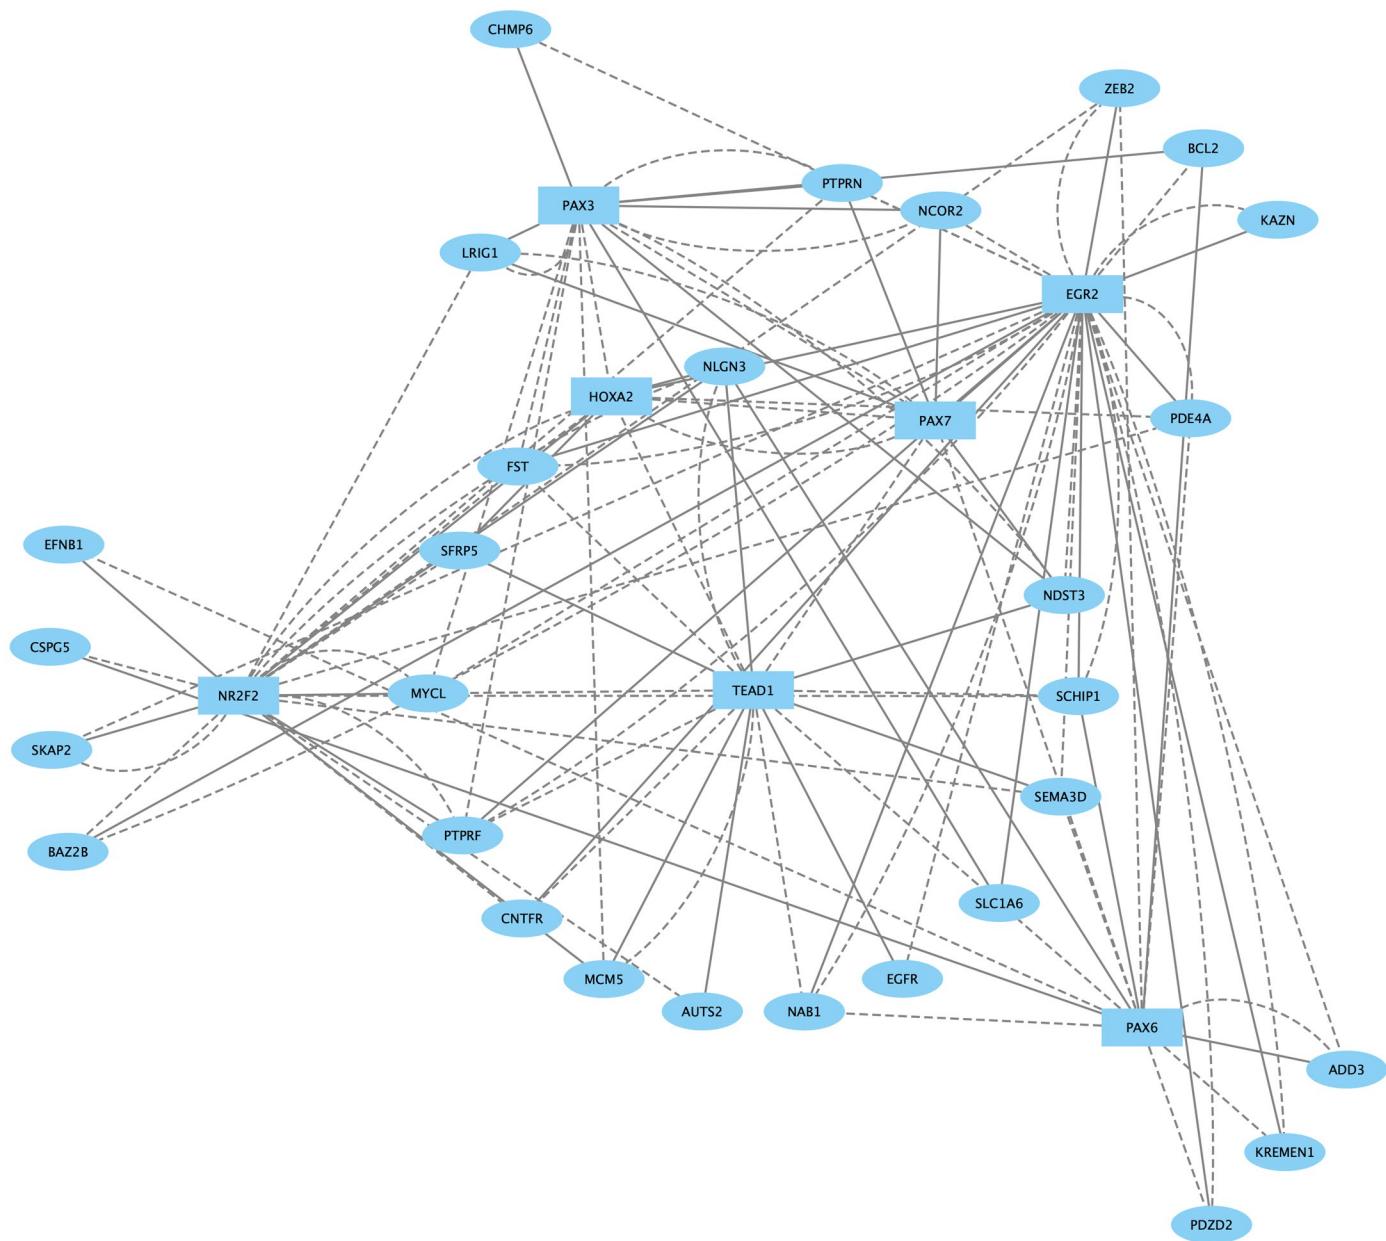

Supplement: supp [file elife-87772-supp-v1.zip]

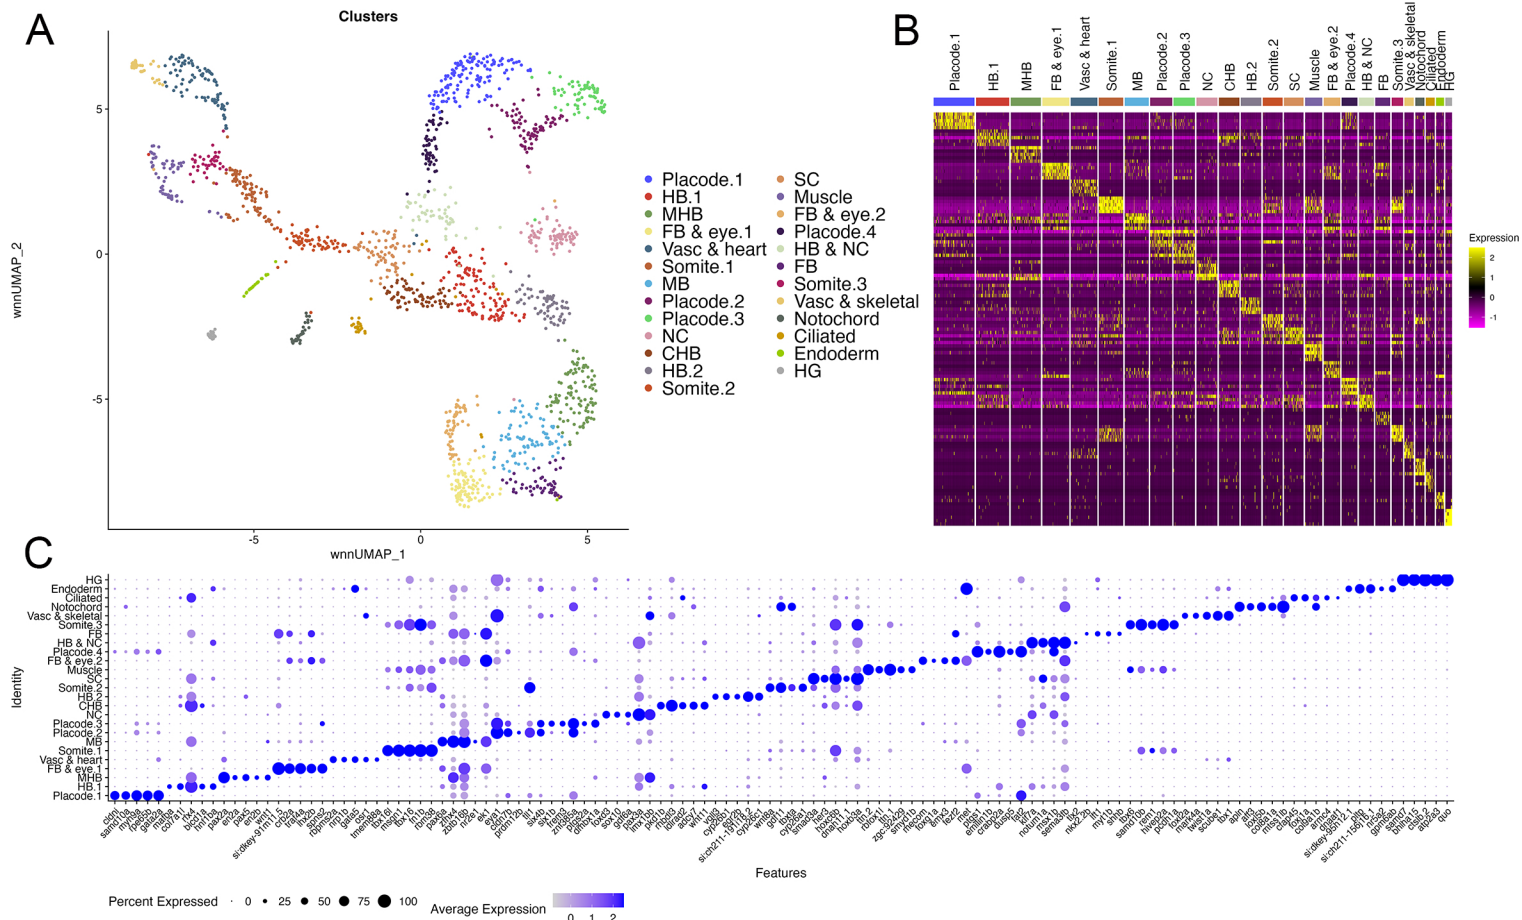

Supplement: supp [file elife-87772-supp-v1.zip]

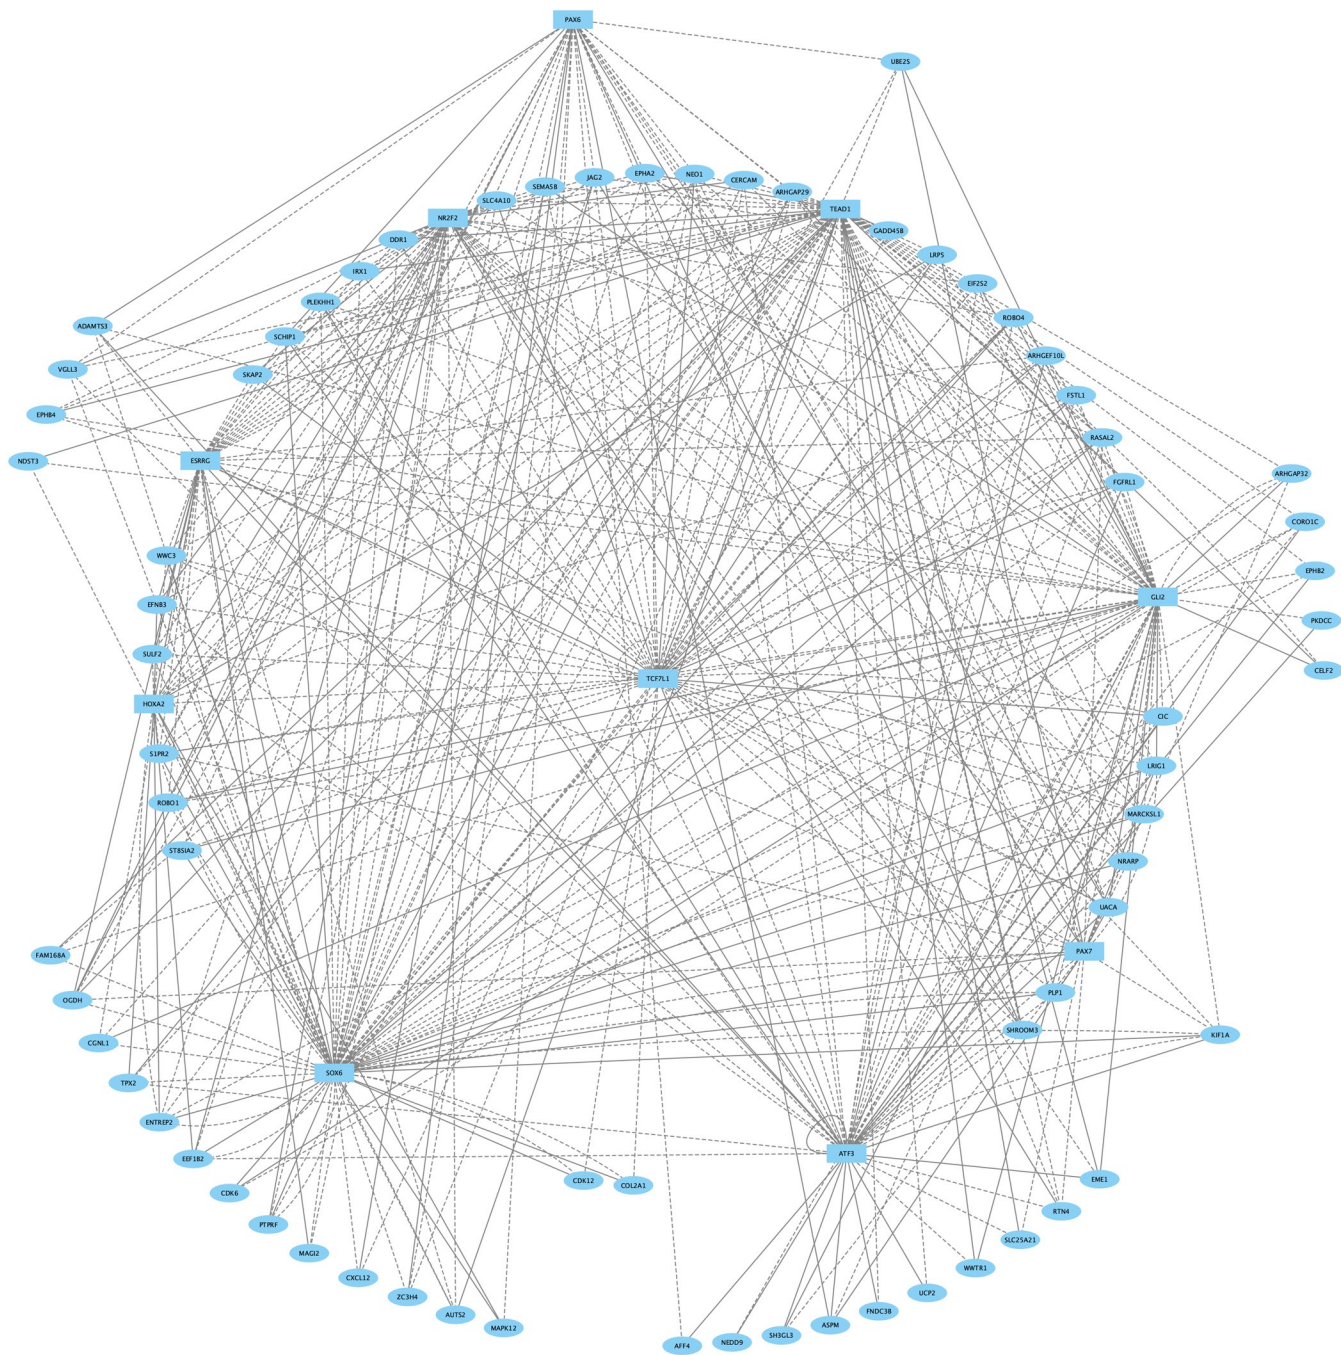

Supplement: supp [file elife-87772-supp-v1.zip]
